# Supplementary material for: Dissecting the Contributions of Cooperating Gene Mutations to Cancer Phenotypes and Drug Responses with Patient-Derived iPSCs
Source: PubMed Central journal article supplement — Stem Cell Reports. 2018 Apr 19;10(5):1610–24. doi: 10.1016/j.stemcr.2018.03.020 (PMC5995368; doi:10.1016/j.stemcr.2018.03.020), 2018-04-19
Supplement: mmc2.pdf [file mmc2.pdf]

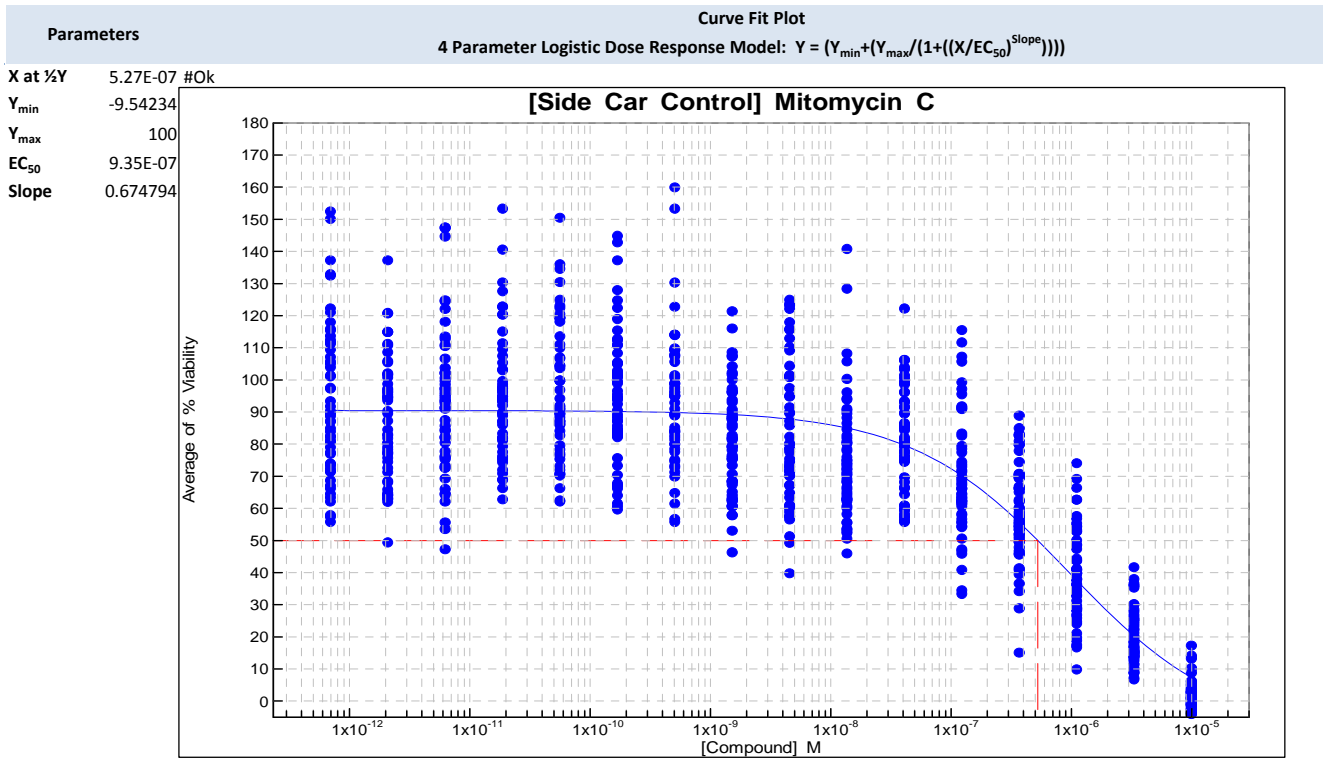

| Compounds and Final Concentrations (M)                     | Average of % Viability | Hits (✓) |
|------------------------------------------------------------|------------------------|----------|
| <b>1-(2-METHOXYPHENYL)PIRAZINE HYDROCHLORIDE</b>           |                        |          |
| 10.0E-9                                                    |                        | 118.47   |
| 100.0E-9                                                   |                        | 130.00   |
| 1.0E-6                                                     |                        | 118.93   |
| 10.0E-6                                                    |                        | 125.04   |
| <b>1,2alpha-EPOXYDEACETOXYDIHYDROGEDUNIN</b>               |                        |          |
| 10.0E-9                                                    |                        | 105.43   |
| 100.0E-9                                                   |                        | 82.10    |
| 1.0E-6                                                     |                        | 88.62    |
| 10.0E-6                                                    |                        | 75.82    |
| <b>1,3,5-TRIMETHOXYBENZENE</b>                             |                        |          |
| 10.0E-9                                                    |                        | 88.94    |
| 100.0E-9                                                   |                        | 127.86   |
| 1.0E-6                                                     |                        | 115.83   |
| 10.0E-6                                                    |                        | 104.78   |
| <b>1,3-DIDEACETYL-7-DEACETOXY-7-OXOKHIVORIN</b>            |                        |          |
| 10.0E-9                                                    |                        | 112.19   |
| 100.0E-9                                                   |                        | 91.18    |
| 1.0E-6                                                     |                        | 106.21   |
| 10.0E-6                                                    |                        | 103.59   |
| <b>1,7-DIDEACETOXY-1,7-DIOXO-3-DEACETYLKHIVORIN</b>        |                        |          |
| 10.0E-9                                                    |                        | 78.44    |
| 100.0E-9                                                   |                        | 103.41   |
| 1.0E-6                                                     |                        | 76.29    |
| 10.0E-6                                                    |                        | 126.59   |
| <b>1,7-DIDEACETOXY-1,7-DIOXOKHIVORIN</b>                   |                        |          |
| 10.0E-9                                                    |                        | 122.84   |
| 100.0E-9                                                   |                        | 92.26    |
| 1.0E-6                                                     |                        | 135.97   |
| 10.0E-6                                                    |                        | 94.20    |
| <b>10-HYDROXYCAMPTOTHECIN</b>                              |                        |          |
| 10.0E-9                                                    |                        | 88.30    |
| 100.0E-9                                                   |                        | 131.57   |
| 1.0E-6                                                     |                        | 109.70   |
| 10.0E-6                                                    |                        | 98.62    |
| <b>11a-ACETOXYPROGESTERONE</b>                             |                        |          |
| 10.0E-9                                                    |                        | 103.95   |
| 100.0E-9                                                   |                        | 131.02   |
| 1.0E-6                                                     |                        | 110.28   |
| 10.0E-6                                                    |                        | 79.27    |
| <b>11alpha-HYDROXYPROGESTERONE HEMISUCCINATE</b>           |                        |          |
| 10.0E-9                                                    |                        | 97.68    |
| 100.0E-9                                                   |                        | 139.25   |
| 1.0E-6                                                     |                        | 130.79   |
| 10.0E-6                                                    |                        | 142.45   |
| <b>12a-HYDROXY-5-DEOXYDEHYDROMUNDUSERONE</b>               |                        |          |
| 10.0E-9                                                    |                        | 116.45   |
| 100.0E-9                                                   |                        | 113.99   |
| 1.0E-6                                                     |                        | 107.72   |
| 10.0E-6                                                    |                        | 69.57    |
| <b>12a-HYDROXY-9-DEMETHYLMUNDUSERONE-8-CARBOXYLIC ACID</b> |                        |          |
| 10.0E-9                                                    |                        | 81.37    |
| 100.0E-9                                                   |                        | 117.79   |
| 1.0E-6                                                     |                        | 98.26    |
| 10.0E-6                                                    |                        | 95.33    |
| <b>13-METHYL-4,4-BISNOR-8,11,13-PODOCARPATRIEN-3-ONE</b>   |                        |          |
| 10.0E-9                                                    |                        | 106.43   |
| 100.0E-9                                                   |                        | 96.84    |
| 1.0E-6                                                     |                        | 109.88   |
| 10.0E-6                                                    |                        | 90.71    |
| <b>18alpha-GLYCYRRHETINIC ACID</b>                         |                        |          |
| 10.0E-9                                                    |                        | 91.06    |
| 100.0E-9                                                   |                        | 108.52   |
| 1.0E-6                                                     |                        | 84.57    |
| 10.0E-6                                                    |                        | 101.35   |
| <b>18-AMINOABIETA-8,11,13-TRIENE SULFATE</b>               |                        |          |
| 10.0E-9                                                    |                        | 134.98   |
| 100.0E-9                                                   |                        | 101.11   |
| 1.0E-6                                                     |                        | 98.10    |
| 10.0E-6                                                    |                        | 47.55    |
| <b>1-HYDROXY-3,6,7-TRIMETHOXY-2,8-DIPRENILXANTHONE</b>     |                        |          |
| 10.0E-9                                                    |                        | 149.13   |
| 100.0E-9                                                   |                        | 97.80    |
| 1.0E-6                                                     |                        | 90.54    |
| 10.0E-6                                                    |                        | 82.79    |
| <b>1-MONOPALMITIN</b>                                      |                        |          |
| 10.0E-9                                                    |                        | 102.45   |
| 100.0E-9                                                   |                        | 116.33   |
| 1.0E-6                                                     |                        | 66.65    |
| 10.0E-6                                                    |                        | 153.19   |
| <b>1-PHENYLBIGUANIDE HYDROCHLORIDE</b>                     |                        |          |
| 10.0E-9                                                    |                        | 96.42    |
| 100.0E-9                                                   |                        | 83.35    |
| 1.0E-6                                                     |                        | 120.41   |
| 10.0E-6                                                    |                        | 75.74    |

| Compounds and Final Concentrations (M)               | Average of % Viability | Hits (✓) |
|------------------------------------------------------|------------------------|----------|
| <b>1R,2S-PHENYLPROPYLAMINE</b>                       |                        |          |
| 10.0E-9                                              |                        | 117.57   |
| 100.0E-9                                             |                        | 112.66   |
| 1.0E-6                                               |                        | 88.71    |
| 10.0E-6                                              |                        | 99.50    |
| <b>2,2'-AZO-bis-2-AMINOPROPANE</b>                   |                        |          |
| 10.0E-9                                              |                        | 126.98   |
| 100.0E-9                                             |                        | 79.62    |
| 1.0E-6                                               |                        | 135.63   |
| 10.0E-6                                              |                        | 113.24   |
| <b>2',2'-BISEPIGALLOECATECHIN DIGALLATE</b>          |                        |          |
| 10.0E-9                                              |                        | 118.95   |
| 100.0E-9                                             |                        | 126.68   |
| 1.0E-6                                               |                        | 112.37   |
| 10.0E-6                                              |                        | 78.97    |
| <b>2,3,4-TRIHYDROXY-4'-ETHOXYBENZOPHENONE</b>        |                        |          |
| 10.0E-9                                              |                        | 119.84   |
| 100.0E-9                                             |                        | 87.01    |
| 1.0E-6                                               |                        | 130.04   |
| 10.0E-6                                              |                        | 70.46    |
| <b>2,3,4'-TRIHYDROXY-4-METHOXYBENZOPHENONE</b>       |                        |          |
| 10.0E-9                                              |                        | 97.55    |
| 100.0E-9                                             |                        | 129.73   |
| 1.0E-6                                               |                        | 122.82   |
| 10.0E-6                                              |                        | 85.19    |
| <b>2,3-DICHLORO-5,8-DIHYDROXYNAPHTHOQUINONE</b>      |                        |          |
| 10.0E-9                                              |                        | 113.80   |
| 100.0E-9                                             |                        | 101.08   |
| 1.0E-6                                               |                        | 75.53    |
| 10.0E-6                                              |                        | 38.20    |
| <b>2',3-DIHYDROXY-4,4',6'-TRIMETHOXYCHALCONE</b>     |                        |          |
| 10.0E-9                                              |                        | 118.32   |
| 100.0E-9                                             |                        | 120.77   |
| 1.0E-6                                               |                        | 94.50    |
| 10.0E-6                                              |                        | 89.81    |
| <b>2,3-DIHYDROXY-4-METHOXY-4'-ETHOXYBENZOPHENONE</b> |                        |          |
| 10.0E-9                                              |                        | 81.35    |
| 100.0E-9                                             |                        | 130.06   |
| 1.0E-6                                               |                        | 74.55    |
| 10.0E-6                                              |                        | 68.38    |
| <b>2,3-DIHYDROXY-6,7-DICHLOROQUINOXALINE</b>         |                        |          |
| 10.0E-9                                              |                        | 95.26    |
| 100.0E-9                                             |                        | 113.48   |
| 1.0E-6                                               |                        | 113.85   |
| 10.0E-6                                              |                        | 102.50   |
| <b>2,3-DIMERCAPTOSUCCINIC ACID</b>                   |                        |          |
| 10.0E-9                                              |                        | 110.32   |
| 100.0E-9                                             |                        | 111.42   |
| 1.0E-6                                               |                        | 92.03    |
| 10.0E-6                                              |                        | 96.41    |
| <b>2',4-DIHYDROXY-3,4',6'-TRIMETHOXYCHALCONE</b>     |                        |          |
| 10.0E-9                                              |                        | 103.69   |
| 100.0E-9                                             |                        | 109.33   |
| 1.0E-6                                               |                        | 125.36   |
| 10.0E-6                                              |                        | 99.52    |
| <b>2',4'-DIHYDROXY-4-METHOXYCHALCONE</b>             |                        |          |
| 10.0E-9                                              |                        | 130.09   |
| 100.0E-9                                             |                        | 157.64   |
| 1.0E-6                                               |                        | 93.39    |
| 10.0E-6                                              |                        | 101.32   |
| <b>2',4'-DIHYDROXYCHALCONE</b>                       |                        |          |
| 10.0E-9                                              |                        | 92.18    |
| 100.0E-9                                             |                        | 102.07   |
| 1.0E-6                                               |                        | 103.28   |
| 10.0E-6                                              |                        | 82.75    |
| <b>2',4-DIHYDROXYCHALCONE</b>                        |                        |          |
| 10.0E-9                                              |                        | 94.43    |
| 100.0E-9                                             |                        | 128.81   |
| 1.0E-6                                               |                        | 103.34   |
| 10.0E-6                                              |                        | 80.16    |
| <b>2',4'-DIHYDROXYCHALCONE 4'-GLUCOSIDE</b>          |                        |          |
| 10.0E-9                                              |                        | 136.35   |
| 100.0E-9                                             |                        | 110.11   |
| 1.0E-6                                               |                        | 84.30    |
| 10.0E-6                                              |                        | 83.74    |
| <b>2,4-DINITROPHENOL</b>                             |                        |          |
| 10.0E-9                                              |                        | 128.61   |
| 100.0E-9                                             |                        | 114.36   |
| 1.0E-6                                               |                        | 124.88   |
| 10.0E-6                                              |                        | 114.45   |
| <b>2',5'-DIHYDROXY-4-METHOXYCHALCONE</b>             |                        |          |
| 10.0E-9                                              |                        | 88.55    |
| 100.0E-9                                             |                        | 109.20   |
| 1.0E-6                                               |                        | 104.39   |
| 10.0E-6                                              |                        | 105.66   |

| Compounds and Final Concentrations (M)                                                             | Average of % Viability | Hits (✓) |
|----------------------------------------------------------------------------------------------------|------------------------|----------|
| <b>2,5-DI-T-BUTYL-4-HYDROXYANISOLE</b>                                                             |                        |          |
| 10.0E-9                                                                                            |                        | 133.60   |
| 100.0E-9                                                                                           |                        | 97.34    |
| 1.0E-6                                                                                             |                        | 122.42   |
| 10.0E-6                                                                                            |                        | 166.32   |
| <b>2,6-DIHYDROXY-4-METHOXYTOLUENE</b>                                                              |                        |          |
| 10.0E-9                                                                                            |                        | 98.68    |
| 100.0E-9                                                                                           |                        | 98.53    |
| 1.0E-6                                                                                             |                        | 116.76   |
| 10.0E-6                                                                                            |                        | 100.45   |
| <b>2,6-DIMETHOXYQUINONE</b>                                                                        |                        |          |
| 10.0E-9                                                                                            |                        | 88.97    |
| 100.0E-9                                                                                           |                        | 122.41   |
| 1.0E-6                                                                                             |                        | 136.47   |
| 10.0E-6                                                                                            |                        | 58.48    |
| <b>21-ACETOPYREGNENOLONE</b>                                                                       |                        |          |
| 10.0E-9                                                                                            |                        | 94.66    |
| 100.0E-9                                                                                           |                        | 84.55    |
| 1.0E-6                                                                                             |                        | 108.29   |
| 10.0E-6                                                                                            |                        | 87.25    |
| <b>2-AMINOBENZENESULFONAMIDE</b>                                                                   |                        |          |
| 10.0E-9                                                                                            |                        | 95.35    |
| 100.0E-9                                                                                           |                        | 95.85    |
| 1.0E-6                                                                                             |                        | 110.38   |
| 10.0E-6                                                                                            |                        | 80.55    |
| <b>2-BENZOYL-5-METHOXYBENZOQUINONE</b>                                                             |                        |          |
| 10.0E-9                                                                                            |                        | 115.01   |
| 100.0E-9                                                                                           |                        | 103.01   |
| 1.0E-6                                                                                             |                        | 118.61   |
| 10.0E-6                                                                                            |                        | 82.41    |
| <b>2-HYDROXY-3,4-DIMETHOXYBENZOIC ACID</b>                                                         |                        |          |
| 10.0E-9                                                                                            |                        | 103.45   |
| 100.0E-9                                                                                           |                        | 100.72   |
| 1.0E-6                                                                                             |                        | 89.45    |
| 10.0E-6                                                                                            |                        | 56.32    |
| <b>2-HYDROXY-5 (6)EPOXY-TETRAHYDROCARYOPHYLLENE</b>                                                |                        |          |
| 10.0E-9                                                                                            |                        | 67.77    |
| 100.0E-9                                                                                           |                        | 103.48   |
| 1.0E-6                                                                                             |                        | 60.38    |
| 10.0E-6                                                                                            |                        | 86.53    |
| <b>2-MERCAPTOBENZOTHAZOLE</b>                                                                      |                        |          |
| 10.0E-9                                                                                            |                        | 78.95    |
| 100.0E-9                                                                                           |                        | 74.27    |
| 1.0E-6                                                                                             |                        | 86.22    |
| 10.0E-6                                                                                            |                        | 97.20    |
| <b>2-METHOXY-5 (6)EPOXY-TETRAHYDROCARYOPHYLLENE</b>                                                |                        |          |
| 10.0E-9                                                                                            |                        | 102.50   |
| 100.0E-9                                                                                           |                        | 95.84    |
| 1.0E-6                                                                                             |                        | 115.18   |
| 10.0E-6                                                                                            |                        | 121.99   |
| <b>2-METHOXYFORMONETIN</b>                                                                         |                        |          |
| 10.0E-9                                                                                            |                        | 127.62   |
| 100.0E-9                                                                                           |                        | 153.44   |
| 1.0E-6                                                                                             |                        | 99.26    |
| 10.0E-6                                                                                            |                        | 90.38    |
| <b>2-METHOXYRESORCINOL</b>                                                                         |                        |          |
| 10.0E-9                                                                                            |                        | 143.75   |
| 100.0E-9                                                                                           |                        | 127.18   |
| 1.0E-6                                                                                             |                        | 110.57   |
| 10.0E-6                                                                                            |                        | 89.87    |
| <b>2-METHOXYXANTHONE</b>                                                                           |                        |          |
| 10.0E-9                                                                                            |                        | 84.04    |
| 100.0E-9                                                                                           |                        | 107.26   |
| 1.0E-6                                                                                             |                        | 108.05   |
| 10.0E-6                                                                                            |                        | 117.24   |
| <b>2-METHYL GRAMINE</b>                                                                            |                        |          |
| 10.0E-9                                                                                            |                        | 100.53   |
| 100.0E-9                                                                                           |                        | 142.65   |
| 1.0E-6                                                                                             |                        | 110.63   |
| 10.0E-6                                                                                            |                        | 92.42    |
| <b>2-METHYL-4-(PIPERIDIN-1-YLCARBOXY)-5-ISOPROPYLPHENYLTRIMETHYLAMMONIUM CHLORIDE</b>              |                        |          |
| 10.0E-9                                                                                            |                        | 114.75   |
| 100.0E-9                                                                                           |                        | 86.44    |
| 1.0E-6                                                                                             |                        | 120.08   |
| 10.0E-6                                                                                            |                        | 112.92   |
| <b>2-METHYL-5,7,8-TRIMETHOXYISOFLAVONE</b>                                                         |                        |          |
| 10.0E-9                                                                                            |                        | 80.37    |
| 100.0E-9                                                                                           |                        | 80.53    |
| 1.0E-6                                                                                             |                        | 89.45    |
| 10.0E-6                                                                                            |                        | 86.36    |
| <b>2-METHYLENE-5-(2,5-DIOXOTETRAHYDROFURAN-3-YL)-6-OXO--10,10-DIMETHYLBICYCLO[7: 2: 0]UNDECANE</b> |                        |          |
| 10.0E-9                                                                                            |                        | 128.56   |
| 100.0E-9                                                                                           |                        | 113.35   |
| 1.0E-6                                                                                             |                        | 117.52   |
| 10.0E-6                                                                                            |                        | 91.54    |

| Compounds and Final Concentrations (M)                | Average of % Viability | Hits (✓) |
|-------------------------------------------------------|------------------------|----------|
| <b>2-THIOURACIL</b>                                   |                        |          |
| 10.0E-9                                               |                        | 76.08    |
| 100.0E-9                                              |                        | 113.61   |
| 1.0E-6                                                |                        | 107.36   |
| 10.0E-6                                               |                        | 83.10    |
| <b>3,16-DIDEOXYMEXICANOLIDE-3beta-DIOL</b>            |                        |          |
| 10.0E-9                                               |                        | 101.61   |
| 100.0E-9                                              |                        | 100.54   |
| 1.0E-6                                                |                        | 87.67    |
| 10.0E-6                                               |                        | 78.49    |
| <b>3,3'-DIINDOLYLMETHANE</b>                          |                        |          |
| 10.0E-9                                               |                        | 112.39   |
| 100.0E-9                                              |                        | 95.45    |
| 1.0E-6                                                |                        | 82.60    |
| 10.0E-6                                               |                        | 96.48    |
| <b>3,4',5,6,7-PENTAMETHOXYFLAVONE</b>                 |                        |          |
| 10.0E-9                                               |                        | 120.58   |
| 100.0E-9                                              |                        | 108.25   |
| 1.0E-6                                                |                        | 116.03   |
| 10.0E-6                                               |                        | 98.60    |
| <b>3,4-DIDESMETHYL-5-DESHYDROXY-3'-ETHOXYSCLEROIN</b> |                        |          |
| 10.0E-9                                               |                        | 153.51   |
| 100.0E-9                                              |                        | 167.71   |
| 1.0E-6                                                |                        | 106.28   |
| 10.0E-6                                               |                        | 106.51   |
| <b>3,4-DIMETHOXYCINNAMIC ACID</b>                     |                        |          |
| 10.0E-9                                               |                        | 113.97   |
| 100.0E-9                                              |                        | 74.43    |
| 1.0E-6                                                |                        | 119.78   |
| 10.0E-6                                               |                        | 119.74   |
| <b>3,4-DIMETHOXYDALBERGIONE</b>                       |                        |          |
| 10.0E-9                                               |                        | 76.53    |
| 100.0E-9                                              |                        | 103.66   |
| 1.0E-6                                                |                        | 102.26   |
| 10.0E-6                                               |                        | 59.02    |
| <b>3,4'-DIMETHOXYFLAVONE</b>                          |                        |          |
| 10.0E-9                                               |                        | 82.50    |
| 100.0E-9                                              |                        | 123.79   |
| 1.0E-6                                                |                        | 65.76    |
| 10.0E-6                                               |                        | 99.68    |
| <b>3,6-DIMETHOXYFLAVONE</b>                           |                        |          |
| 10.0E-9                                               |                        | 101.87   |
| 100.0E-9                                              |                        | 119.34   |
| 1.0E-6                                                |                        | 98.29    |
| 10.0E-6                                               |                        | 99.44    |
| <b>3,7-DIHYDROXYFLAVONE</b>                           |                        |          |
| 10.0E-9                                               |                        | 102.57   |
| 100.0E-9                                              |                        | 88.63    |
| 1.0E-6                                                |                        | 111.41   |
| 10.0E-6                                               |                        | 125.05   |
| <b>3,7-DIMETHOXYFLAVONE</b>                           |                        |          |
| 10.0E-9                                               |                        | 95.81    |
| 100.0E-9                                              |                        | 83.54    |
| 1.0E-6                                                |                        | 94.70    |
| 10.0E-6                                               |                        | 71.64    |
| <b>3,7-EPOXYCARYOPHYLLAN-6-OL</b>                     |                        |          |
| 10.0E-9                                               |                        | 120.69   |
| 100.0E-9                                              |                        | 144.44   |
| 1.0E-6                                                |                        | 86.78    |
| 10.0E-6                                               |                        | 117.74   |
| <b>3,7-EPOXYCARYOPHYLLAN-6-ONE</b>                    |                        |          |
| 10.0E-9                                               |                        | 117.07   |
| 100.0E-9                                              |                        | 77.77    |
| 1.0E-6                                                |                        | 85.97    |
| 10.0E-6                                               |                        | 78.27    |
| <b>3-ACETAMIDOCOUMARIN</b>                            |                        |          |
| 10.0E-9                                               |                        | 111.02   |
| 100.0E-9                                              |                        | 116.46   |
| 1.0E-6                                                |                        | 105.00   |
| 10.0E-6                                               |                        | 74.12    |
| <b>3-ACETOXPREGN-16-EN-12,20-DIONE</b>                |                        |          |
| 10.0E-9                                               |                        | 79.76    |
| 100.0E-9                                              |                        | 144.34   |
| 1.0E-6                                                |                        | 74.91    |
| 10.0E-6                                               |                        | 74.71    |
| <b>3-ACETYLCOUMARIN</b>                               |                        |          |
| 10.0E-9                                               |                        | 110.97   |
| 100.0E-9                                              |                        | 117.35   |
| 1.0E-6                                                |                        | 109.00   |
| 10.0E-6                                               |                        | 106.01   |
| <b>3alpha-ACETOXYDIHYDRODEOXYGEDUNIN</b>              |                        |          |
| 10.0E-9                                               |                        | 124.72   |
| 100.0E-9                                              |                        | 110.98   |
| 1.0E-6                                                |                        | 148.03   |
| 10.0E-6                                               |                        | 110.98   |

| Compounds and Final Concentrations (M)                                   | Average of % Viability                                                               | Hits (✓) |
|--------------------------------------------------------------------------|--------------------------------------------------------------------------------------|----------|
| <b>3alpha-HYDROXY-3-DEOXYANGOLENSIC ACID METHYL ESTER</b>                |                                                                                      |          |
| 10.0E-9                                                                  |    | 99.03    |
| 100.0E-9                                                                 |    | 121.65   |
| 1.0E-6                                                                   |    | 90.66    |
| 10.0E-6                                                                  |    | 117.59   |
| <b>3alpha-HYDROXY-4,4-BISNOR-8,11,13-PODOCARPATRIENE</b>                 |                                                                                      |          |
| 10.0E-9                                                                  |    | 114.06   |
| 100.0E-9                                                                 |    | 89.82    |
| 1.0E-6                                                                   |    | 121.22   |
| 10.0E-6                                                                  |    | 101.33   |
| <b>3-AMINO-1,2,4-TRIAZOLE</b>                                            |                                                                                      |          |
| 10.0E-9                                                                  |    | 124.49   |
| 100.0E-9                                                                 |    | 76.05    |
| 1.0E-6                                                                   |    | 86.87    |
| 10.0E-6                                                                  |    | 111.34   |
| <b>3-AMINO-beta-PINENE</b>                                               |                                                                                      |          |
| 10.0E-9                                                                  |    | 101.92   |
| 100.0E-9                                                                 |    | 95.45    |
| 1.0E-6                                                                   |    | 117.95   |
| 10.0E-6                                                                  |    | 116.31   |
| <b>3-AMINOPROPANESULPHONIC ACID</b>                                      |                                                                                      |          |
| 10.0E-9                                                                  |    | 108.94   |
| 100.0E-9                                                                 |    | 161.18   |
| 1.0E-6                                                                   |    | 99.26    |
| 10.0E-6                                                                  |    | 67.87    |
| <b>3beta-ACETOXYDEOXODIHYDROGEDUNIN</b>                                  |                                                                                      |          |
| 10.0E-9                                                                  |    | 91.01    |
| 100.0E-9                                                                 |    | 135.22   |
| 1.0E-6                                                                   |    | 69.99    |
| 10.0E-6                                                                  |    | 64.53    |
| <b>3beta-HYDROXY-23,24-BISNORCHOL-5-ENIC ACID</b>                        |                                                                                      |          |
| 10.0E-9                                                                  |    | 110.16   |
| 100.0E-9                                                                 |    | 138.40   |
| 1.0E-6                                                                   |    | 87.79    |
| 10.0E-6                                                                  |    | 23.11    |
| <b>3beta-HYDROXYDEOXODIHYDRODEOXYGEDUNIN</b>                             |                                                                                      |          |
| 10.0E-9                                                                  |    | 97.79    |
| 100.0E-9                                                                 |    | 72.13    |
| 1.0E-6                                                                   |   | 91.29    |
| 10.0E-6                                                                  |  | 83.50    |
| <b>3-BROMO-4-METHYL-3,4-HEXAMETHYLENE-3,4-DIHYDRODIAZETE-1,2-DIOXIDE</b> |                                                                                      |          |
| 10.0E-9                                                                  |  | 85.27    |
| 100.0E-9                                                                 |  | 98.37    |
| 1.0E-6                                                                   |  | 118.23   |
| 10.0E-6                                                                  |  | 48.42    |
| <b>3-DEACETYLKHIVORIN</b>                                                |                                                                                      |          |
| 10.0E-9                                                                  |  | 97.62    |
| 100.0E-9                                                                 |  | 67.90    |
| 1.0E-6                                                                   |  | 89.46    |
| 10.0E-6                                                                  |  | 114.82   |
| <b>3-DEOXO-3beta-ACETOXYDEOXYDIHYDROGEDUNIN</b>                          |                                                                                      |          |
| 10.0E-9                                                                  |  | 86.11    |
| 100.0E-9                                                                 |  | 79.67    |
| 1.0E-6                                                                   |  | 79.01    |
| 10.0E-6                                                                  |  | 74.72    |
| <b>3-DEOXO-3beta-HYDROXYMEXICANOLIDE 16-ENOL ETHER</b>                   |                                                                                      |          |
| 10.0E-9                                                                  |  | 104.46   |
| 100.0E-9                                                                 |  | 110.23   |
| 1.0E-6                                                                   |  | 115.91   |
| 10.0E-6                                                                  |  | 112.96   |
| <b>3-DEOXY-3beta-HYDROXYANGOLENSIC ACID METHYL ESTER</b>                 |                                                                                      |          |
| 10.0E-9                                                                  |  | 120.94   |
| 100.0E-9                                                                 |  | 91.46    |
| 1.0E-6                                                                   |  | 115.11   |
| 10.0E-6                                                                  |  | 73.26    |
| <b>3-DESHYDROXYSAPPANOL TRIMETHYL ETHER</b>                              |                                                                                      |          |
| 10.0E-9                                                                  |  | 92.80    |
| 100.0E-9                                                                 |  | 104.23   |
| 1.0E-6                                                                   |  | 79.63    |
| 10.0E-6                                                                  |  | 96.14    |
| <b>3H-1,2-DITHIOLE-3-THIONE</b>                                          |                                                                                      |          |
| 10.0E-9                                                                  |  | 103.53   |
| 100.0E-9                                                                 |  | 113.03   |
| 1.0E-6                                                                   |  | 100.64   |
| 10.0E-6                                                                  |  | 114.06   |
| <b>3-HYDROXY-3',4'-DIMETHOXYFLAVONE</b>                                  |                                                                                      |          |
| 10.0E-9                                                                  |  | 110.81   |
| 100.0E-9                                                                 |  | 95.92    |
| 1.0E-6                                                                   |  | 107.93   |
| 10.0E-6                                                                  |  | 91.58    |
| <b>3-HYDROXY-4-(SUCCIN-2-YL)-CARYOLANE delta-LACTONE</b>                 |                                                                                      |          |
| 10.0E-9                                                                  |  | 99.55    |
| 100.0E-9                                                                 |  | 112.18   |
| 1.0E-6                                                                   |  | 143.14   |
| 10.0E-6                                                                  |  | 98.72    |

| Compounds and Final Concentrations (M)                           | Average of % Viability | Hits (✓) |
|------------------------------------------------------------------|------------------------|----------|
| <b>3-HYDROXYFLAVONE</b>                                          |                        |          |
| 10.0E-9                                                          |                        | 129.98   |
| 100.0E-9                                                         |                        | 87.90    |
| 1.0E-6                                                           |                        | 109.04   |
| 10.0E-6                                                          |                        | 109.17   |
| <b>3-HYDROXYTYRAMINE</b>                                         |                        |          |
| 10.0E-9                                                          |                        | 118.36   |
| 100.0E-9                                                         |                        | 145.10   |
| 1.0E-6                                                           |                        | 126.09   |
| 10.0E-6                                                          |                        | 125.93   |
| <b>3-ISOBUTYL-1-METHYLXANTHINE (IBMX)</b>                        |                        |          |
| 10.0E-9                                                          |                        | 107.25   |
| 100.0E-9                                                         |                        | 84.66    |
| 1.0E-6                                                           |                        | 100.04   |
| 10.0E-6                                                          |                        | 95.93    |
| <b>3-METHOXYCATECHOL</b>                                         |                        |          |
| 10.0E-9                                                          |                        | 96.81    |
| 100.0E-9                                                         |                        | 121.60   |
| 1.0E-6                                                           |                        | 107.05   |
| 10.0E-6                                                          |                        | 90.84    |
| <b>3-METHYLORSELLINIC ACID</b>                                   |                        |          |
| 10.0E-9                                                          |                        | 119.73   |
| 100.0E-9                                                         |                        | 135.90   |
| 1.0E-6                                                           |                        | 125.54   |
| 10.0E-6                                                          |                        | 93.69    |
| <b>3-METHYLXANTHINE</b>                                          |                        |          |
| 10.0E-9                                                          |                        | 96.32    |
| 100.0E-9                                                         |                        | 84.09    |
| 1.0E-6                                                           |                        | 110.08   |
| 10.0E-6                                                          |                        | 41.47    |
| <b>3-NOR-3-OXOPANASINSAN-6-OL</b>                                |                        |          |
| 10.0E-9                                                          |                        | 128.57   |
| 100.0E-9                                                         |                        | 110.98   |
| 1.0E-6                                                           |                        | 107.07   |
| 10.0E-6                                                          |                        | 125.89   |
| <b>3-OXOURSAN (28-13)OLIDE</b>                                   |                        |          |
| 10.0E-9                                                          |                        | 90.96    |
| 100.0E-9                                                         |                        | 88.17    |
| 1.0E-6                                                           |                        | 87.79    |
| 10.0E-6                                                          |                        | 123.10   |
| <b>4-(3-BUTOXY-4-METHOXYBENZYL)IMIDAZOLIDIN-2-ONE</b>            |                        |          |
| 10.0E-9                                                          |                        | 109.02   |
| 100.0E-9                                                         |                        | 103.49   |
| 1.0E-6                                                           |                        | 79.92    |
| 10.0E-6                                                          |                        | 142.72   |
| <b>4,4'-DIISOTHIOCYANOSTILBENE-2,2'-SUFONIC ACID SODIUM SALT</b> |                        |          |
| 10.0E-9                                                          |                        | 128.46   |
| 100.0E-9                                                         |                        | 97.65    |
| 1.0E-6                                                           |                        | 99.75    |
| 10.0E-6                                                          |                        | 113.03   |
| <b>4,4'-DIMETHOXYDALBERGIONE</b>                                 |                        |          |
| 10.0E-9                                                          |                        | 130.37   |
| 100.0E-9                                                         |                        | 86.69    |
| 1.0E-6                                                           |                        | 112.36   |
| 10.0E-6                                                          |                        | 86.07    |
| <b>4-ACETOXYPHENOL</b>                                           |                        |          |
| 10.0E-9                                                          |                        | 104.07   |
| 100.0E-9                                                         |                        | 99.25    |
| 1.0E-6                                                           |                        | 125.77   |
| 10.0E-6                                                          |                        | 75.76    |
| <b>4'-DEMETHYLEPIPODOPHYLLOTOXIN</b>                             |                        |          |
| 10.0E-9                                                          |                        | 94.31    |
| 100.0E-9                                                         |                        | 50.56    |
| 1.0E-6                                                           |                        | 32.47    |
| 10.0E-6                                                          |                        | 63.59    |
| <b>4-HYDROXY-6-METHYLPYRAN-2-ONE</b>                             |                        |          |
| 10.0E-9                                                          |                        | 133.36   |
| 100.0E-9                                                         |                        | 91.64    |
| 1.0E-6                                                           |                        | 93.88    |
| 10.0E-6                                                          |                        | 120.13   |
| <b>4-HYDROXYANTIPYRINE</b>                                       |                        |          |
| 10.0E-9                                                          |                        | 134.07   |
| 100.0E-9                                                         |                        | 146.52   |
| 1.0E-6                                                           |                        | 117.68   |
| 10.0E-6                                                          |                        | 121.12   |
| <b>4'-HYDROXYCHALCONE</b>                                        |                        |          |
| 10.0E-9                                                          |                        | 87.66    |
| 100.0E-9                                                         |                        | 94.09    |
| 1.0E-6                                                           |                        | 82.71    |
| 10.0E-6                                                          |                        | 58.14    |
| <b>4'-METHOXYCHALCONE</b>                                        |                        |          |
| 10.0E-9                                                          |                        | 93.53    |
| 100.0E-9                                                         |                        | 147.53   |
| 1.0E-6                                                           |                        | 93.84    |
| 10.0E-6                                                          |                        | 81.24    |

| Compounds and Final Concentrations (M)                          | Average of % Viability | Hits (✓) |
|-----------------------------------------------------------------|------------------------|----------|
| <b>4'-METHOXYFLAVONE</b>                                        |                        |          |
| 10.0E-9                                                         |                        | 102.82   |
| 100.0E-9                                                        |                        | 106.45   |
| 1.0E-6                                                          |                        | 116.20   |
| 10.0E-6                                                         |                        | 86.32    |
| <b>4-METHYLDAPHNETIN</b>                                        |                        |          |
| 10.0E-9                                                         |                        | 92.88    |
| 100.0E-9                                                        |                        | 89.10    |
| 1.0E-6                                                          |                        | 97.42    |
| 10.0E-6                                                         |                        | 105.39   |
| <b>4-METHYLESCULETIN</b>                                        |                        |          |
| 10.0E-9                                                         |                        | 115.93   |
| 100.0E-9                                                        |                        | 106.53   |
| 1.0E-6                                                          |                        | 99.24    |
| 10.0E-6                                                         |                        | 111.93   |
| <b>4-NAPHTHALIMIDOBUTYRIC ACID</b>                              |                        |          |
| 10.0E-9                                                         |                        | 179.40   |
| 100.0E-9                                                        |                        | 85.21    |
| 1.0E-6                                                          |                        | 90.33    |
| 10.0E-6                                                         |                        | 64.40    |
| <b>4-O-METHYLPHLORACETOPHENONE</b>                              |                        |          |
| 10.0E-9                                                         |                        | 100.62   |
| 100.0E-9                                                        |                        | 107.93   |
| 1.0E-6                                                          |                        | 110.50   |
| 10.0E-6                                                         |                        | 95.11    |
| <b>5,7-DIHYDROXY-4-METHYLCOUMARIN</b>                           |                        |          |
| 10.0E-9                                                         |                        | 107.54   |
| 100.0E-9                                                        |                        | 99.65    |
| 1.0E-6                                                          |                        | 96.07    |
| 10.0E-6                                                         |                        | 96.89    |
| <b>5,7-DIHYDROXYISOFLAVONE</b>                                  |                        |          |
| 10.0E-9                                                         |                        | 83.54    |
| 100.0E-9                                                        |                        | 159.94   |
| 1.0E-6                                                          |                        | 83.91    |
| 10.0E-6                                                         |                        | 91.53    |
| <b>5alpha-ANDROSTAN-3,17-DIONE</b>                              |                        |          |
| 10.0E-9                                                         |                        | 112.01   |
| 100.0E-9                                                        |                        | 135.79   |
| 1.0E-6                                                          |                        | 113.70   |
| 10.0E-6                                                         |                        | 114.74   |
| <b>5alpha-CHOLESTAN-3beta-OL-6-ONE</b>                          |                        |          |
| 10.0E-9                                                         |                        | 109.27   |
| 100.0E-9                                                        |                        | 130.96   |
| 1.0E-6                                                          |                        | 88.67    |
| 10.0E-6                                                         |                        | 21.50    |
| <b>5alpha-CHOLESTANOL</b>                                       |                        |          |
| 10.0E-9                                                         |                        | 119.43   |
| 100.0E-9                                                        |                        | 106.03   |
| 1.0E-6                                                          |                        | 115.05   |
| 10.0E-6                                                         |                        | 137.36   |
| <b>5-AMINOPENTANOIC ACID HYDROCHLORIDE</b>                      |                        |          |
| 10.0E-9                                                         |                        | 118.42   |
| 100.0E-9                                                        |                        | 104.24   |
| 1.0E-6                                                          |                        | 103.24   |
| 10.0E-6                                                         |                        | 79.32    |
| <b>5beta-12-METHOXY-4,4-BISNOR-8,11,13-PODOCARPATRIEN-3-ONE</b> |                        |          |
| 10.0E-9                                                         |                        | 131.72   |
| 100.0E-9                                                        |                        | 107.29   |
| 1.0E-6                                                          |                        | 132.05   |
| 10.0E-6                                                         |                        | 128.54   |
| <b>5-FLUOROINDOLE-2-CARBOXYLIC ACID</b>                         |                        |          |
| 10.0E-9                                                         |                        | 148.02   |
| 100.0E-9                                                        |                        | 110.19   |
| 1.0E-6                                                          |                        | 135.52   |
| 10.0E-6                                                         |                        | 118.90   |
| <b>5-HYDROXY-2',4',7,8-TETRAMETHOXYFLAVONE</b>                  |                        |          |
| 10.0E-9                                                         |                        | 71.77    |
| 100.0E-9                                                        |                        | 79.86    |
| 1.0E-6                                                          |                        | 116.72   |
| 10.0E-6                                                         |                        | 108.38   |
| <b>5-METHYLFURMETHIDE</b>                                       |                        |          |
| 10.0E-9                                                         |                        | 123.09   |
| 100.0E-9                                                        |                        | 78.96    |
| 1.0E-6                                                          |                        | 110.96   |
| 10.0E-6                                                         |                        | 112.75   |
| <b>5-METHYLHYDANTOIN</b>                                        |                        |          |
| 10.0E-9                                                         |                        | 134.08   |
| 100.0E-9                                                        |                        | 115.10   |
| 1.0E-6                                                          |                        | 134.23   |
| 10.0E-6                                                         |                        | 102.33   |
| <b>6,2'-DIMETHOXYFLAVONE</b>                                    |                        |          |
| 10.0E-9                                                         |                        | 127.55   |
| 100.0E-9                                                        |                        | 94.15    |
| 1.0E-6                                                          |                        | 92.71    |
| 10.0E-6                                                         |                        | 138.34   |



| Compounds and Final Concentrations (M)                     | Average of % Viability | Hits (✓) |
|------------------------------------------------------------|------------------------|----------|
| <b>6,3'-DIMETHOXYFLAVONE</b>                               |                        |          |
| 10.0E-9                                                    | ✓                      | 106.20   |
| 100.0E-9                                                   | ✓                      | 119.12   |
| 1.0E-6                                                     | ✓                      | 115.37   |
| 10.0E-6                                                    | ✓                      | 59.88    |
| <b>6,4'-DIHYDROXYFLAVONE</b>                               |                        |          |
| 10.0E-9                                                    | ✓                      | 114.99   |
| 100.0E-9                                                   | ✓                      | 84.40    |
| 1.0E-6                                                     | ✓                      | 93.90    |
| 10.0E-6                                                    | ✓                      | 80.18    |
| <b>6,7-DICHLORO-3-HYDROXY-2-QUINOXALINECARBOXYLIC ACID</b> |                        |          |
| 10.0E-9                                                    | ✓                      | 100.18   |
| 100.0E-9                                                   | ✓                      | 129.77   |
| 1.0E-6                                                     | ✓                      | 120.71   |
| 10.0E-6                                                    | ✓                      | 113.57   |
| <b>6alpha-METHYLPREDNISOLONE ACETATE</b>                   |                        |          |
| 10.0E-9                                                    | ✓                      | 89.53    |
| 100.0E-9                                                   | ✓                      | 133.25   |
| 1.0E-6                                                     | ✓                      | 138.31   |
| 10.0E-6                                                    | ✓                      | 113.66   |
| <b>6-AMINONICOTINAMIDE</b>                                 |                        |          |
| 10.0E-9                                                    | ✓                      | 90.74    |
| 100.0E-9                                                   | ✓                      | 121.79   |
| 1.0E-6                                                     | ✓                      | 135.61   |
| 10.0E-6                                                    | ✓                      | 126.42   |
| <b>6-HYDROXYANGOLENSIC ACID METHYL ESTER</b>               |                        |          |
| 10.0E-9                                                    | ✓                      | 138.73   |
| 100.0E-9                                                   | ✓                      | 92.28    |
| 1.0E-6                                                     | ✓                      | 141.22   |
| 10.0E-6                                                    | ✓                      | 125.81   |
| <b>6-HYDROXYTROPINONE</b>                                  |                        |          |
| 10.0E-9                                                    | ✓                      | 116.58   |
| 100.0E-9                                                   | ✓                      | 159.14   |
| 1.0E-6                                                     | ✓                      | 59.75    |
| 10.0E-6                                                    | ✓                      | 78.44    |
| <b>7,2'-DIHYDROXYFLAVONE</b>                               |                        |          |
| 10.0E-9                                                    | ✓                      | 57.22    |
| 100.0E-9                                                   | ✓                      | 115.32   |
| 1.0E-6                                                     | ✓                      | 95.58    |
| 10.0E-6                                                    | ✓                      | 112.04   |
| <b>7,4'-DIHYDROXYFLAVONE</b>                               |                        |          |
| 10.0E-9                                                    | ✓                      | 93.85    |
| 100.0E-9                                                   | ✓                      | 71.24    |
| 1.0E-6                                                     | ✓                      | 98.18    |
| 10.0E-6                                                    | ✓                      | 107.24   |
| <b>7,4'-DIMETHOXYISOFLAVONE</b>                            |                        |          |
| 10.0E-9                                                    | ✓                      | 97.17    |
| 100.0E-9                                                   | ✓                      | 117.41   |
| 1.0E-6                                                     | ✓                      | 111.17   |
| 10.0E-6                                                    | ✓                      | 85.51    |
| <b>7,8-DIHYDROXYFLAVONE</b>                                |                        |          |
| 10.0E-9                                                    | ✓                      | 110.33   |
| 100.0E-9                                                   | ✓                      | 154.87   |
| 1.0E-6                                                     | ✓                      | 121.82   |
| 10.0E-6                                                    | ✓                      | 51.97    |
| <b>7-AMINOCEPHALOSPORANIC ACID</b>                         |                        |          |
| 10.0E-9                                                    | ✓                      | 49.50    |
| 100.0E-9                                                   | ✓                      | 111.23   |
| 1.0E-6                                                     | ✓                      | 107.12   |
| 10.0E-6                                                    | ✓                      | 85.77    |
| <b>7-DEACETOXY-7-OXOKHIVORIN</b>                           |                        |          |
| 10.0E-9                                                    | ✓                      | 97.78    |
| 100.0E-9                                                   | ✓                      | 93.23    |
| 1.0E-6                                                     | ✓                      | 94.78    |
| 10.0E-6                                                    | ✓                      | 82.28    |
| <b>7-DEACETYLKHIVORIN</b>                                  |                        |          |
| 10.0E-9                                                    | ✓                      | 115.07   |
| 100.0E-9                                                   | ✓                      | 106.96   |
| 1.0E-6                                                     | ✓                      | 99.99    |
| 10.0E-6                                                    | ✓                      | 145.92   |
| <b>7-DESACETOXY-6,7-DEHYDROGEDUNIN</b>                     |                        |          |
| 10.0E-9                                                    | ✓                      | 117.08   |
| 100.0E-9                                                   | ✓                      | 93.01    |
| 1.0E-6                                                     | ✓                      | 85.22    |
| 10.0E-6                                                    | ✓                      | 74.37    |
| <b>7-DESHYDROXYPYROGALLIN-4-CARBOXYLIC ACID</b>            |                        |          |
| 10.0E-9                                                    | ✓                      | 113.14   |
| 100.0E-9                                                   | ✓                      | 90.57    |
| 1.0E-6                                                     | ✓                      | 93.86    |
| 10.0E-6                                                    | ✓                      | 88.40    |
| <b>7-HYDROXYFLAVONE</b>                                    |                        |          |
| 10.0E-9                                                    | ✓                      | 96.05    |
| 100.0E-9                                                   | ✓                      | 82.41    |
| 1.0E-6                                                     | ✓                      | 109.82   |
| 10.0E-6                                                    | ✓                      | 111.90   |

| Compounds and Final Concentrations (M)      | Average of % Viability | Hits (✓) |
|---------------------------------------------|------------------------|----------|
| <b>7-NITROINDAZOLE</b>                      |                        |          |
| 10.0E-9                                     |                        | 126.21   |
| 100.0E-9                                    |                        | 109.35   |
| 1.0E-6                                      |                        | 125.10   |
| 10.0E-6                                     |                        | 200.40   |
| <b>7-OXOCHOLESTEROL</b>                     |                        |          |
| 10.0E-9                                     |                        | 102.58   |
| 100.0E-9                                    |                        | 97.69    |
| 1.0E-6                                      |                        | 112.94   |
| 10.0E-6                                     |                        | 55.32    |
| <b>7-OXOCHOLESTERYL ACETATE</b>             |                        |          |
| 10.0E-9                                     |                        | 105.56   |
| 100.0E-9                                    |                        | 105.55   |
| 1.0E-6                                      |                        | 107.36   |
| 10.0E-6                                     |                        | 118.12   |
| <b>8beta-HYDROXYCARAPIN, 3,8-HEMIACETAL</b> |                        |          |
| 10.0E-9                                     |                        | 105.44   |
| 100.0E-9                                    |                        | 122.74   |
| 1.0E-6                                      |                        | 114.95   |
| 10.0E-6                                     |                        | 97.07    |
| <b>8-CYCLOPENTYLTHEOPHYLLINE</b>            |                        |          |
| 10.0E-9                                     |                        | 108.32   |
| 100.0E-9                                    |                        | 114.83   |
| 1.0E-6                                      |                        | 82.42    |
| 10.0E-6                                     |                        | 116.46   |
| <b>8-HYDROXYCARAPINIC ACID</b>              |                        |          |
| 10.0E-9                                     |                        | 92.91    |
| 100.0E-9                                    |                        | 136.41   |
| 1.0E-6                                      |                        | 88.75    |
| 10.0E-6                                     |                        | 94.57    |
| <b>ABAMECTIN</b>                            |                        |          |
| 10.0E-9                                     |                        | 96.40    |
| 100.0E-9                                    |                        | 75.31    |
| 1.0E-6                                      |                        | 103.65   |
| 10.0E-6                                     |                        | 38.06    |
| <b>ABIETIC ACID</b>                         |                        |          |
| 10.0E-9                                     |                        | 119.46   |
| 100.0E-9                                    |                        | 146.38   |
| 1.0E-6                                      |                        | 136.24   |
| 10.0E-6                                     |                        | 99.51    |
| <b>ACACETIN</b>                             |                        |          |
| 10.0E-9                                     |                        | 118.84   |
| 100.0E-9                                    |                        | 75.61    |
| 1.0E-6                                      |                        | 97.36    |
| 10.0E-6                                     |                        | 76.93    |
| <b>ACACETIN DIACETATE</b>                   |                        |          |
| 10.0E-9                                     |                        | 110.32   |
| 100.0E-9                                    |                        | 112.45   |
| 1.0E-6                                      |                        | 68.23    |
| 10.0E-6                                     |                        | 98.65    |
| <b>ACADESINE</b>                            |                        |          |
| 10.0E-9                                     |                        | 127.75   |
| 100.0E-9                                    |                        | 65.43    |
| 1.0E-6                                      |                        | 98.50    |
| 10.0E-6                                     |                        | 90.25    |
| <b>ACAMPROSATE CALCIUM</b>                  |                        |          |
| 10.0E-9                                     |                        | 101.36   |
| 100.0E-9                                    |                        | 121.52   |
| 1.0E-6                                      |                        | 90.07    |
| 10.0E-6                                     |                        | 101.04   |
| <b>ACARBOSE</b>                             |                        |          |
| 10.0E-9                                     |                        | 138.23   |
| 100.0E-9                                    |                        | 143.63   |
| 1.0E-6                                      |                        | 111.67   |
| 10.0E-6                                     |                        | 97.48    |
| <b>ACEBUTOLOL HYDROCHLORIDE</b>             |                        |          |
| 10.0E-9                                     |                        | 137.81   |
| 100.0E-9                                    |                        | 112.86   |
| 1.0E-6                                      |                        | 98.88    |
| 10.0E-6                                     |                        | 113.86   |
| <b>ACECAINIDE HYDROCHLORIDE</b>             |                        |          |
| 10.0E-9                                     |                        | 154.33   |
| 100.0E-9                                    |                        | 126.24   |
| 1.0E-6                                      |                        | 102.27   |
| 10.0E-6                                     |                        | 97.38    |
| <b>ACECLIDINE</b>                           |                        |          |
| 10.0E-9                                     |                        | 86.08    |
| 100.0E-9                                    |                        | 55.60    |
| 1.0E-6                                      |                        | 70.77    |
| 10.0E-6                                     |                        | 83.28    |
| <b>ACEDAPSONE</b>                           |                        |          |
| 10.0E-9                                     |                        | 88.99    |
| 100.0E-9                                    |                        | 110.78   |
| 1.0E-6                                      |                        | 90.08    |
| 10.0E-6                                     |                        | 118.97   |

| Compounds and Final Concentrations (M) | Average of % Viability | Hits (✓) |
|----------------------------------------|------------------------|----------|
| <b>ACEMETACIN</b>                      |                        |          |
| 10.0E-9                                |                        | 106.42   |
| 100.0E-9                               |                        | 117.28   |
| 1.0E-6                                 |                        | 91.65    |
| 10.0E-6                                |                        | 70.27    |
| <b>ACEPROMAZINE MALEATE</b>            |                        |          |
| 10.0E-9                                |                        | 107.89   |
| 100.0E-9                               |                        | 135.75   |
| 1.0E-6                                 |                        | 131.24   |
| 10.0E-6                                |                        | 92.70    |
| <b>ACETAMINOPHEN</b>                   |                        |          |
| 10.0E-9                                |                        | 124.77   |
| 100.0E-9                               |                        | 93.45    |
| 1.0E-6                                 |                        | 109.55   |
| 10.0E-6                                |                        | 86.93    |
| <b>ACETAMINOSALOL</b>                  |                        |          |
| 10.0E-9                                |                        | 100.84   |
| 100.0E-9                               |                        | 114.22   |
| 1.0E-6                                 |                        | 122.27   |
| 10.0E-6                                |                        | 83.20    |
| <b>ACETANILIDE</b>                     |                        |          |
| 10.0E-9                                |                        | 97.48    |
| 100.0E-9                               |                        | 115.01   |
| 1.0E-6                                 |                        | 82.22    |
| 10.0E-6                                |                        | 108.71   |
| <b>ACETARSOL</b>                       |                        |          |
| 10.0E-9                                |                        | 104.83   |
| 100.0E-9                               |                        | 98.36    |
| 1.0E-6                                 |                        | 130.62   |
| 10.0E-6                                |                        | 124.81   |
| <b>ACETAZOLAMIDE</b>                   |                        |          |
| 10.0E-9                                |                        | 138.48   |
| 100.0E-9                               |                        | 128.59   |
| 1.0E-6                                 |                        | 104.75   |
| 10.0E-6                                |                        | 78.70    |
| <b>ACETOHEXAMIDE</b>                   |                        |          |
| 10.0E-9                                |                        | 84.17    |
| 100.0E-9                               |                        | 90.33    |
| 1.0E-6                                 |                        | 96.95    |
| 10.0E-6                                |                        | 117.10   |
| <b>ACETOHYDROXAMIC ACID</b>            |                        |          |
| 10.0E-9                                |                        | 374.78   |
| 100.0E-9                               |                        | 75.80    |
| 1.0E-6                                 |                        | 115.96   |
| 10.0E-6                                |                        | 107.61   |
| <b>ACETOSYRINGONE</b>                  |                        |          |
| 10.0E-9                                |                        | 86.16    |
| 100.0E-9                               |                        | 89.06    |
| 1.0E-6                                 |                        | 84.14    |
| 10.0E-6                                |                        | 93.58    |
| <b>ACETRIAZOIC ACID</b>                |                        |          |
| 10.0E-9                                |                        | 119.84   |
| 100.0E-9                               |                        | 105.57   |
| 1.0E-6                                 |                        | 101.36   |
| 10.0E-6                                |                        | 93.21    |
| <b>ACETYL ISOGAMBOGIC ACID</b>         |                        |          |
| 10.0E-9                                |                        | 87.17    |
| 100.0E-9                               |                        | 84.37    |
| 1.0E-6                                 |                        | 89.49    |
| 10.0E-6                                |                        | 1.82     |
| <b>ACETYLCHOLINE</b>                   |                        |          |
| 10.0E-9                                |                        | 124.00   |
| 100.0E-9                               |                        | 105.66   |
| 1.0E-6                                 |                        | 109.82   |
| 10.0E-6                                |                        | 114.86   |
| <b>ACETYLCYSTEINE</b>                  |                        |          |
| 10.0E-9                                |                        | 74.30    |
| 100.0E-9                               |                        | 99.29    |
| 1.0E-6                                 |                        | 92.48    |
| 10.0E-6                                |                        | 107.57   |
| <b>ACETYLGUCOSAMINE</b>                |                        |          |
| 10.0E-9                                |                        | 108.01   |
| 100.0E-9                               |                        | 122.71   |
| 1.0E-6                                 |                        | 112.87   |
| 10.0E-6                                |                        | 81.96    |
| <b>ACETYLGLUTAMIC ACID</b>             |                        |          |
| 10.0E-9                                |                        | 110.38   |
| 100.0E-9                               |                        | 113.89   |
| 1.0E-6                                 |                        | 128.86   |
| 10.0E-6                                |                        | 149.40   |
| <b>ACETYL-L-LEUCINE</b>                |                        |          |
| 10.0E-9                                |                        | 100.96   |
| 100.0E-9                               |                        | 85.68    |
| 1.0E-6                                 |                        | 83.13    |
| 10.0E-6                                |                        | 72.31    |

| Compounds and Final Concentrations (M) | Average of % Viability | Hits (✓) |
|----------------------------------------|------------------------|----------|
| <b>ACETYLPHENYLALANINE</b>             |                        |          |
| 10.0E-9                                |                        | 129.11   |
| 100.0E-9                               |                        | 89.42    |
| 1.0E-6                                 |                        | 121.27   |
| 10.0E-6                                |                        | 79.97    |
| <b>ACETYLTRYPTOPHAN</b>                |                        |          |
| 10.0E-9                                |                        | 91.76    |
| 100.0E-9                               |                        | 95.72    |
| 1.0E-6                                 |                        | 81.88    |
| 10.0E-6                                |                        | 85.60    |
| <b>ACETYLTRYPTOPHANAMIDE</b>           |                        |          |
| 10.0E-9                                |                        | 106.50   |
| 100.0E-9                               |                        | 130.86   |
| 1.0E-6                                 |                        | 94.42    |
| 10.0E-6                                |                        | 109.94   |
| <b>ACEXAMIC ACID</b>                   |                        |          |
| 10.0E-9                                |                        | 114.82   |
| 100.0E-9                               |                        | 142.29   |
| 1.0E-6                                 |                        | 129.56   |
| 10.0E-6                                |                        | 95.31    |
| <b>ACONITIC ACID</b>                   |                        |          |
| 10.0E-9                                |                        | 98.85    |
| 100.0E-9                               |                        | 114.06   |
| 1.0E-6                                 |                        | 109.77   |
| 10.0E-6                                |                        | 93.17    |
| <b>ACRIFLAVINIUM HYDROCHLORIDE</b>     |                        | ✓        |
| 10.0E-9                                |                        | 114.69   |
| 100.0E-9                               |                        | 132.66   |
| 1.0E-6                                 |                        | 72.63    |
| 10.0E-6                                |                        | 38.65    |
| <b>ACRISORCIN</b>                      |                        | ✓        |
| 10.0E-9                                |                        | 117.28   |
| 100.0E-9                               |                        | 111.50   |
| 1.0E-6                                 |                        | 98.48    |
| 10.0E-6                                |                        | 50.79    |
| <b>ACTINONIN</b>                       |                        |          |
| 10.0E-9                                |                        | 76.90    |
| 100.0E-9                               |                        | 88.00    |
| 1.0E-6                                 |                        | 146.80   |
| 10.0E-6                                |                        | 114.46   |
| <b>ACYCLOVIR</b>                       |                        |          |
| 10.0E-9                                |                        | 108.46   |
| 100.0E-9                               |                        | 113.63   |
| 1.0E-6                                 |                        | 115.81   |
| 10.0E-6                                |                        | 84.78    |
| <b>ADENINE</b>                         |                        |          |
| 10.0E-9                                |                        | 120.83   |
| 100.0E-9                               |                        | 122.59   |
| 1.0E-6                                 |                        | 114.25   |
| 10.0E-6                                |                        | 121.65   |
| <b>ADENOSINE</b>                       |                        |          |
| 10.0E-9                                |                        | 89.32    |
| 100.0E-9                               |                        | 103.90   |
| 1.0E-6                                 |                        | 64.88    |
| 10.0E-6                                |                        | 88.99    |
| <b>ADENOSINE PHOSPHATE</b>             |                        |          |
| 10.0E-9                                |                        | 96.42    |
| 100.0E-9                               |                        | 106.88   |
| 1.0E-6                                 |                        | 122.94   |
| 10.0E-6                                |                        | 67.76    |
| <b>ADIPHENINE HYDROCHLORIDE</b>        |                        |          |
| 10.0E-9                                |                        | 122.73   |
| 100.0E-9                               |                        | 101.28   |
| 1.0E-6                                 |                        | 82.58    |
| 10.0E-6                                |                        | 136.97   |
| <b>ADONITOL</b>                        |                        |          |
| 10.0E-9                                |                        | 103.81   |
| 100.0E-9                               |                        | 129.71   |
| 1.0E-6                                 |                        | 101.07   |
| 10.0E-6                                |                        | 75.73    |
| <b>ADRENALINE BITARTRATE</b>           |                        |          |
| 10.0E-9                                |                        | 93.10    |
| 100.0E-9                               |                        | 106.00   |
| 1.0E-6                                 |                        | 98.14    |
| 10.0E-6                                |                        | 159.20   |
| <b>AESCULIN</b>                        |                        |          |
| 10.0E-9                                |                        | 93.85    |
| 100.0E-9                               |                        | 129.88   |
| 1.0E-6                                 |                        | 81.51    |
| 10.0E-6                                |                        | 116.87   |
| <b>AGARIC ACID</b>                     |                        |          |
| 10.0E-9                                |                        | 116.58   |
| 100.0E-9                               |                        | 115.63   |
| 1.0E-6                                 |                        | 97.29    |
| 10.0E-6                                |                        | 102.15   |

| Compounds and Final Concentrations (M)                  | Average of % Viability | Hits (✓) |
|---------------------------------------------------------|------------------------|----------|
| <b>AGELASINE (stereochemistry of diterpene unknown)</b> |                        |          |
| 10.0E-9                                                 |                        | 139.05   |
| 100.0E-9                                                |                        | 121.60   |
| 1.0E-6                                                  |                        | 102.68   |
| 10.0E-6                                                 |                        | 96.72    |
| <b>AGMATINE SULFATE</b>                                 |                        |          |
| 10.0E-9                                                 |                        | 111.15   |
| 100.0E-9                                                |                        | 98.13    |
| 1.0E-6                                                  |                        | 79.82    |
| 10.0E-6                                                 |                        | 104.70   |
| <b>AJMALINE</b>                                         |                        |          |
| 10.0E-9                                                 |                        | 113.12   |
| 100.0E-9                                                |                        | 109.26   |
| 1.0E-6                                                  |                        | 111.35   |
| 10.0E-6                                                 |                        | 117.62   |
| <b>AKLOMIDE</b>                                         |                        |          |
| 10.0E-9                                                 |                        | 93.18    |
| 100.0E-9                                                |                        | 96.94    |
| 1.0E-6                                                  |                        | 131.15   |
| 10.0E-6                                                 |                        | 124.94   |
| <b>ALANYL-di-LEUCINE</b>                                |                        |          |
| 10.0E-9                                                 |                        | 118.46   |
| 100.0E-9                                                |                        | 129.08   |
| 1.0E-6                                                  |                        | 119.90   |
| 10.0E-6                                                 |                        | 105.66   |
| <b>ALAPROCLATE</b>                                      |                        |          |
| 10.0E-9                                                 |                        | 78.29    |
| 100.0E-9                                                |                        | 86.74    |
| 1.0E-6                                                  |                        | 99.50    |
| 10.0E-6                                                 |                        | 117.70   |
| <b>ALBENDAZOLE</b>                                      |                        |          |
| 10.0E-9                                                 |                        | 142.93   |
| 100.0E-9                                                |                        | 102.73   |
| 1.0E-6                                                  |                        | 93.51    |
| 10.0E-6                                                 |                        | 53.21    |
| <b>ALBUTEROL (+/-)</b>                                  |                        |          |
| 10.0E-9                                                 |                        | 131.48   |
| 100.0E-9                                                |                        | 119.95   |
| 1.0E-6                                                  |                        | 67.91    |
| 10.0E-6                                                 |                        | 119.97   |
| <b>ALCLOMETAZONE DIPROPIONATE</b>                       |                        |          |
| 10.0E-9                                                 |                        | 88.61    |
| 100.0E-9                                                |                        | 101.46   |
| 1.0E-6                                                  |                        | 109.91   |
| 10.0E-6                                                 |                        | 95.19    |
| <b>ALENDRONATE SODIUM</b>                               |                        |          |
| 10.0E-9                                                 |                        | 97.31    |
| 100.0E-9                                                |                        | 140.80   |
| 1.0E-6                                                  |                        | 123.04   |
| 10.0E-6                                                 |                        | 124.65   |
| <b>ALEURETIC ACID</b>                                   |                        |          |
| 10.0E-9                                                 |                        | 80.90    |
| 100.0E-9                                                |                        | 110.35   |
| 1.0E-6                                                  |                        | 108.29   |
| 10.0E-6                                                 |                        | 83.70    |
| <b>ALEXIDINE HYDROCHLORIDE</b>                          |                        |          |
| 10.0E-9                                                 |                        | 134.95   |
| 100.0E-9                                                |                        | 103.03   |
| 1.0E-6                                                  |                        | 91.76    |
| 10.0E-6                                                 |                        | 21.00    |
| <b>ALFAXALONE</b>                                       |                        |          |
| 10.0E-9                                                 |                        | 97.22    |
| 100.0E-9                                                |                        | 104.99   |
| 1.0E-6                                                  |                        | 105.97   |
| 10.0E-6                                                 |                        | 54.21    |
| <b>ALFLUZOSIN</b>                                       |                        |          |
| 10.0E-9                                                 |                        | 105.67   |
| 100.0E-9                                                |                        | 106.35   |
| 1.0E-6                                                  |                        | 109.91   |
| 10.0E-6                                                 |                        | 124.46   |
| <b>ALISKIREN HEMIFUMARATE</b>                           |                        |          |
| 10.0E-9                                                 |                        | 97.57    |
| 100.0E-9                                                |                        | 77.82    |
| 1.0E-6                                                  |                        | 87.16    |
| 10.0E-6                                                 |                        | 88.14    |
| <b>ALIZARIN</b>                                         |                        |          |
| 10.0E-9                                                 |                        | 96.78    |
| 100.0E-9                                                |                        | 81.32    |
| 1.0E-6                                                  |                        | 111.48   |
| 10.0E-6                                                 |                        | 75.59    |
| <b>ALLANTOIN</b>                                        |                        |          |
| 10.0E-9                                                 |                        | 105.79   |
| 100.0E-9                                                |                        | 88.63    |
| 1.0E-6                                                  |                        | 91.20    |
| 10.0E-6                                                 |                        | 91.57    |

| Compounds and Final Concentrations (M)    | Average of % Viability | Hits (✓) |
|-------------------------------------------|------------------------|----------|
| <b>ALLOPREGNANOLONE</b>                   |                        |          |
| 10.0E-9                                   |                        | 101.51   |
| 100.0E-9                                  |                        | 126.00   |
| 1.0E-6                                    |                        | 86.84    |
| 10.0E-6                                   |                        | 101.09   |
| <b>ALLOPURINOL</b>                        |                        |          |
| 10.0E-9                                   |                        | 99.92    |
| 100.0E-9                                  |                        | 120.07   |
| 1.0E-6                                    |                        | 99.55    |
| 10.0E-6                                   |                        | 156.17   |
| <b>ALLOXAN</b>                            |                        |          |
| 10.0E-9                                   |                        | 107.66   |
| 100.0E-9                                  |                        | 107.45   |
| 1.0E-6                                    |                        | 108.77   |
| 10.0E-6                                   |                        | 115.26   |
| <b>ALOIN</b>                              |                        |          |
| 10.0E-9                                   |                        | 118.34   |
| 100.0E-9                                  |                        | 112.83   |
| 1.0E-6                                    |                        | 105.81   |
| 10.0E-6                                   |                        | 101.22   |
| <b>alpha-CYANO-3-HYDROXYCINNAMIC ACID</b> |                        |          |
| 10.0E-9                                   |                        | 138.11   |
| 100.0E-9                                  |                        | 95.80    |
| 1.0E-6                                    |                        | 136.64   |
| 10.0E-6                                   |                        | 119.59   |
| <b>alpha-CYANO-4-HYDROXYCINNAMIC ACID</b> |                        |          |
| 10.0E-9                                   |                        | 147.80   |
| 100.0E-9                                  |                        | 147.89   |
| 1.0E-6                                    |                        | 114.83   |
| 10.0E-6                                   |                        | 106.30   |
| <b>alpha-DIHYDROGEDUNOL</b>               |                        |          |
| 10.0E-9                                   |                        | 123.78   |
| 100.0E-9                                  |                        | 115.56   |
| 1.0E-6                                    |                        | 99.21    |
| 10.0E-6                                   |                        | 112.04   |
| <b>alpha-ERGOCRYPTINE</b>                 |                        |          |
| 10.0E-9                                   |                        | 105.18   |
| 100.0E-9                                  |                        | 101.17   |
| 1.0E-6                                    |                        | 117.23   |
| 10.0E-6                                   |                        | 104.82   |
| <b>alpha-HYDROXYDEOXYCHOLIC ACID</b>      |                        |          |
| 10.0E-9                                   |                        | 108.39   |
| 100.0E-9                                  |                        | 119.05   |
| 1.0E-6                                    |                        | 119.45   |
| 10.0E-6                                   |                        | 131.88   |
| <b>alpha-MANGOSTIN</b>                    |                        |          |
| 10.0E-9                                   |                        | 130.61   |
| 100.0E-9                                  |                        | 108.33   |
| 1.0E-6                                    |                        | 74.88    |
| 10.0E-6                                   |                        | 5.33     |
| <b>alpha-TOCHOPHEROL</b>                  |                        |          |
| 10.0E-9                                   |                        | 119.58   |
| 100.0E-9                                  |                        | 111.06   |
| 1.0E-6                                    |                        | 90.48    |
| 10.0E-6                                   |                        | 132.31   |
| <b>alpha-TOCHOPHERYL ACETATE</b>          |                        |          |
| 10.0E-9                                   |                        | 138.04   |
| 100.0E-9                                  |                        | 111.39   |
| 1.0E-6                                    |                        | 119.15   |
| 10.0E-6                                   |                        | 97.29    |
| <b>ALPINETIN METHYL ETHER</b>             |                        |          |
| 10.0E-9                                   |                        | 97.70    |
| 100.0E-9                                  |                        | 69.05    |
| 1.0E-6                                    |                        | 62.97    |
| 10.0E-6                                   |                        | 88.40    |
| <b>ALPRENOLOL</b>                         |                        |          |
| 10.0E-9                                   |                        | 79.73    |
| 100.0E-9                                  |                        | 95.17    |
| 1.0E-6                                    |                        | 86.93    |
| 10.0E-6                                   |                        | 73.24    |
| <b>ALRESTATIN</b>                         |                        |          |
| 10.0E-9                                   |                        | 89.74    |
| 100.0E-9                                  |                        | 51.22    |
| 1.0E-6                                    |                        | 96.95    |
| 10.0E-6                                   |                        | 63.82    |
| <b>ALTHIAZIDE</b>                         |                        |          |
| 10.0E-9                                   |                        | 77.46    |
| 100.0E-9                                  |                        | 99.37    |
| 1.0E-6                                    |                        | 106.56   |
| 10.0E-6                                   |                        | 110.68   |
| <b>ALTRENOGEST</b>                        |                        |          |
| 10.0E-9                                   |                        | 105.02   |
| 100.0E-9                                  |                        | 100.68   |
| 1.0E-6                                    |                        | 82.84    |
| 10.0E-6                                   |                        | 85.10    |

| Compounds and Final Concentrations (M)   | Average of % Viability | Hits (✓) |
|------------------------------------------|------------------------|----------|
| <b>ALTRETAMINE</b>                       |                        |          |
| 10.0E-9                                  |                        | 134.01   |
| 100.0E-9                                 |                        | 136.10   |
| 1.0E-6                                   |                        | 141.91   |
| 10.0E-6                                  |                        | 105.52   |
| <b>ALVERINE CITRATE</b>                  |                        |          |
| 10.0E-9                                  |                        | 99.48    |
| 100.0E-9                                 |                        | 131.81   |
| 1.0E-6                                   |                        | 122.35   |
| 10.0E-6                                  |                        | 93.13    |
| <b>AMANTADINE HYDROCHLORIDE</b>          |                        |          |
| 10.0E-9                                  |                        | 104.01   |
| 100.0E-9                                 |                        | 99.24    |
| 1.0E-6                                   |                        | 123.55   |
| 10.0E-6                                  |                        | 92.11    |
| <b>AMBROXOL HYDROCHLORIDE</b>            |                        |          |
| 10.0E-9                                  |                        | 121.21   |
| 100.0E-9                                 |                        | 90.87    |
| 1.0E-6                                   |                        | 79.65    |
| 10.0E-6                                  |                        | 88.79    |
| <b>AMCINONIDE</b>                        |                        |          |
| 10.0E-9                                  |                        | 91.00    |
| 100.0E-9                                 |                        | 127.57   |
| 1.0E-6                                   |                        | 93.25    |
| 10.0E-6                                  |                        | 92.18    |
| <b>AMIFOSTINE</b>                        |                        |          |
| 10.0E-9                                  |                        | 114.38   |
| 100.0E-9                                 |                        | 114.45   |
| 1.0E-6                                   |                        | 108.23   |
| 10.0E-6                                  |                        | 100.45   |
| <b>AMIKACIN SULFATE</b>                  |                        |          |
| 10.0E-9                                  |                        | 138.13   |
| 100.0E-9                                 |                        | 137.24   |
| 1.0E-6                                   |                        | 124.62   |
| 10.0E-6                                  |                        | 115.84   |
| <b>AMILORIDE HYDROCHLORIDE</b>           |                        |          |
| 10.0E-9                                  |                        | 97.16    |
| 100.0E-9                                 |                        | 96.98    |
| 1.0E-6                                   |                        | 74.21    |
| 10.0E-6                                  |                        | 89.02    |
| <b>AMINACRINE</b>                        |                        |          |
| 10.0E-9                                  |                        | 76.34    |
| 100.0E-9                                 |                        | 100.25   |
| 1.0E-6                                   |                        | 101.52   |
| 10.0E-6                                  |                        | 70.15    |
| <b>AMINOBENZTROPINE</b>                  |                        |          |
| 10.0E-9                                  |                        | 120.31   |
| 100.0E-9                                 |                        | 150.20   |
| 1.0E-6                                   |                        | 124.78   |
| 10.0E-6                                  |                        | 89.18    |
| <b>AMINOCAPROIC ACID</b>                 |                        |          |
| 10.0E-9                                  |                        | 83.69    |
| 100.0E-9                                 |                        | 119.81   |
| 1.0E-6                                   |                        | 95.55    |
| 10.0E-6                                  |                        | 102.50   |
| <b>AMINOCYCLOPROPANECARBOXYLIC ACID</b>  |                        |          |
| 10.0E-9                                  |                        | 99.55    |
| 100.0E-9                                 |                        | 91.48    |
| 1.0E-6                                   |                        | 102.81   |
| 10.0E-6                                  |                        | 96.02    |
| <b>AMINOGLUTETHIMIDE</b>                 |                        |          |
| 10.0E-9                                  |                        | 125.67   |
| 100.0E-9                                 |                        | 144.02   |
| 1.0E-6                                   |                        | 122.75   |
| 10.0E-6                                  |                        | 114.87   |
| <b>AMINOHIPPURIC ACID</b>                |                        |          |
| 10.0E-9                                  |                        | 111.18   |
| 100.0E-9                                 |                        | 122.68   |
| 1.0E-6                                   |                        | 98.45    |
| 10.0E-6                                  |                        | 132.57   |
| <b>AMINOLEVULINIC ACID HYDROCHLORIDE</b> |                        |          |
| 10.0E-9                                  |                        | 100.02   |
| 100.0E-9                                 |                        | 114.97   |
| 1.0E-6                                   |                        | 104.08   |
| 10.0E-6                                  |                        | 114.86   |
| <b>AMINOPENTAMIDE</b>                    |                        |          |
| 10.0E-9                                  |                        | 97.57    |
| 100.0E-9                                 |                        | 90.78    |
| 1.0E-6                                   |                        | 117.58   |
| 10.0E-6                                  |                        | 70.90    |
| <b>AMINOPTERIN</b>                       |                        |          |
| 10.0E-9                                  |                        | 115.74   |
| 100.0E-9                                 |                        | 82.42    |
| 1.0E-6                                   |                        | 110.01   |
| 10.0E-6                                  |                        | 55.04    |

| Compounds and Final Concentrations (M) | Average of % Viability | Hits (✓) |
|----------------------------------------|------------------------|----------|
| <b>AMINOSALICYLATE SODIUM</b>          |                        |          |
| 10.0E-9                                |                        | 102.36   |
| 100.0E-9                               |                        | 127.88   |
| 1.0E-6                                 |                        | 117.15   |
| 10.0E-6                                |                        | 105.58   |
| <b>AMINOTHIAZOLE</b>                   |                        |          |
| 10.0E-9                                |                        | 127.72   |
| 100.0E-9                               |                        | 99.82    |
| 1.0E-6                                 |                        | 147.61   |
| 10.0E-6                                |                        | 47.19    |
| <b>AMIODARONE HYDROCHLORIDE</b>        |                        |          |
| 10.0E-9                                |                        | 108.30   |
| 100.0E-9                               |                        | 122.29   |
| 1.0E-6                                 |                        | 109.03   |
| 10.0E-6                                |                        | 23.99    |
| <b>AMIPRILOSE</b>                      |                        |          |
| 10.0E-9                                |                        | 83.69    |
| 100.0E-9                               |                        | 92.80    |
| 1.0E-6                                 |                        | 82.31    |
| 10.0E-6                                |                        | 102.94   |
| <b>AMITRAZ</b>                         |                        |          |
| 10.0E-9                                |                        | 134.49   |
| 100.0E-9                               |                        | 135.97   |
| 1.0E-6                                 |                        | 138.82   |
| 10.0E-6                                |                        | 89.06    |
| <b>AMITRIPTYLINE HYDROCHLORIDE</b>     |                        |          |
| 10.0E-9                                |                        | 104.79   |
| 100.0E-9                               |                        | 97.35    |
| 1.0E-6                                 |                        | 98.48    |
| 10.0E-6                                |                        | 115.84   |
| <b>AMLODIPINE BESYLATE</b>             |                        |          |
| 10.0E-9                                |                        | 122.65   |
| 100.0E-9                               |                        | 93.39    |
| 1.0E-6                                 |                        | 99.15    |
| 10.0E-6                                |                        | 99.46    |
| <b>AMODIAQUINE DIHYDROCHLORIDE</b>     |                        |          |
| 10.0E-9                                |                        | 118.92   |
| 100.0E-9                               |                        | 87.01    |
| 1.0E-6                                 |                        | 94.08    |
| 10.0E-6                                |                        | 37.37    |
| <b>AMOXAPINE</b>                       |                        |          |
| 10.0E-9                                |                        | 99.16    |
| 100.0E-9                               |                        | 122.74   |
| 1.0E-6                                 |                        | 90.60    |
| 10.0E-6                                |                        | 48.07    |
| <b>AMOXICILLIN</b>                     |                        |          |
| 10.0E-9                                |                        | 130.19   |
| 100.0E-9                               |                        | 99.67    |
| 1.0E-6                                 |                        | 65.41    |
| 10.0E-6                                |                        | 120.04   |
| <b>AMPHOTERICIN B</b>                  |                        |          |
| 10.0E-9                                |                        | 98.83    |
| 100.0E-9                               |                        | 154.06   |
| 1.0E-6                                 |                        | 87.82    |
| 10.0E-6                                |                        | 126.21   |
| <b>AMPICILLIN SODIUM</b>               |                        |          |
| 10.0E-9                                |                        | 125.78   |
| 100.0E-9                               |                        | 162.06   |
| 1.0E-6                                 |                        | 91.42    |
| 10.0E-6                                |                        | 108.64   |
| <b>AMPROLIUM</b>                       |                        |          |
| 10.0E-9                                |                        | 103.12   |
| 100.0E-9                               |                        | 131.30   |
| 1.0E-6                                 |                        | 65.81    |
| 10.0E-6                                |                        | 89.00    |
| <b>AMPYRONE</b>                        |                        |          |
| 10.0E-9                                |                        | 109.79   |
| 100.0E-9                               |                        | 129.26   |
| 1.0E-6                                 |                        | 101.70   |
| 10.0E-6                                |                        | 148.29   |
| <b>AMPYZINE SULFATE</b>                |                        |          |
| 10.0E-9                                |                        | 124.61   |
| 100.0E-9                               |                        | 104.45   |
| 1.0E-6                                 |                        | 120.22   |
| 10.0E-6                                |                        | 102.35   |
| <b>AMRINONE</b>                        |                        |          |
| 10.0E-9                                |                        | 155.21   |
| 100.0E-9                               |                        | 111.48   |
| 1.0E-6                                 |                        | 110.77   |
| 10.0E-6                                |                        | 144.66   |
| <b>AMSACRINE</b>                       |                        |          |
| 10.0E-9                                |                        | 93.33    |
| 100.0E-9                               |                        | 87.16    |
| 1.0E-6                                 |                        | 52.52    |
| 10.0E-6                                |                        | 45.46    |



| Compounds and Final Concentrations (M) | Average of % Viability | Hits (✓) |
|----------------------------------------|------------------------|----------|
| <b>Row Labels</b>                      |                        |          |
| <b>AMYGDALIN</b>                       |                        |          |
| 10.0E-9                                |                        | 95.67    |
| 100.0E-9                               |                        | 120.72   |
| 1.0E-6                                 |                        | 97.43    |
| 10.0E-6                                |                        | 107.48   |
| <b>ANABASAMINE HYDROCHLORIDE</b>       |                        |          |
| 10.0E-9                                |                        | 88.79    |
| 100.0E-9                               |                        | 112.10   |
| 1.0E-6                                 |                        | 125.20   |
| 10.0E-6                                |                        | 100.44   |
| <b>ANABASINE HYDROCHLORIDE</b>         |                        |          |
| 10.0E-9                                |                        | 100.68   |
| 100.0E-9                               |                        | 116.11   |
| 1.0E-6                                 |                        | 153.04   |
| 10.0E-6                                |                        | 103.07   |
| <b>ANAGRELIDE HYDROCHLORIDE</b>        |                        |          |
| 10.0E-9                                |                        | 127.18   |
| 100.0E-9                               |                        | 88.13    |
| 1.0E-6                                 |                        | 93.33    |
| 10.0E-6                                |                        | 93.89    |
| <b>ANCITABINE HYDROCHLORIDE</b>        |                        |          |
| 10.0E-9                                |                        | 111.09   |
| 100.0E-9                               |                        | 92.53    |
| 1.0E-6                                 |                        | 101.12   |
| 10.0E-6                                |                        | 24.02    |
| <b>ANDROSTA-1,4-DIEN-3,17-DIONE</b>    |                        |          |
| 10.0E-9                                |                        | 76.77    |
| 100.0E-9                               |                        | 105.86   |
| 1.0E-6                                 |                        | 73.86    |
| 10.0E-6                                |                        | 109.34   |
| <b>ANDROSTERONE</b>                    |                        |          |
| 10.0E-9                                |                        | 97.19    |
| 100.0E-9                               |                        | 94.11    |
| 1.0E-6                                 |                        | 116.69   |
| 10.0E-6                                |                        | 98.61    |
| <b>ANDROSTERONE ACETATE</b>            |                        |          |
| 10.0E-9                                |                        | 108.40   |
| 100.0E-9                               |                        | 120.52   |
| 1.0E-6                                 |                        | 100.00   |
| 10.0E-6                                |                        | 115.94   |
| <b>ANETHOLE</b>                        |                        |          |
| 10.0E-9                                |                        | 95.95    |
| 100.0E-9                               |                        | 93.09    |
| 1.0E-6                                 |                        | 124.36   |
| 10.0E-6                                |                        | 102.46   |
| <b>ANGOLENSIN (R)</b>                  |                        |          |
| 10.0E-9                                |                        | 108.29   |
| 100.0E-9                               |                        | 81.75    |
| 1.0E-6                                 |                        | 68.26    |
| 10.0E-6                                |                        | 96.50    |
| <b>ANHYDROBRAZILIC ACID</b>            |                        |          |
| 10.0E-9                                |                        | 95.75    |
| 100.0E-9                               |                        | 121.66   |
| 1.0E-6                                 |                        | 96.48    |
| 10.0E-6                                |                        | 99.28    |
| <b>ANIRACETAM</b>                      |                        |          |
| 10.0E-9                                |                        | 73.34    |
| 100.0E-9                               |                        | 108.27   |
| 1.0E-6                                 |                        | 117.90   |
| 10.0E-6                                |                        | 64.71    |
| <b>ANISODAMINE HYDROBROMIDE</b>        |                        |          |
| 10.0E-9                                |                        | 105.48   |
| 100.0E-9                               |                        | 89.14    |
| 1.0E-6                                 |                        | 107.07   |
| 10.0E-6                                |                        | 102.53   |
| <b>ANISOMYCIN</b>                      |                        |          |
| 10.0E-9                                |                        | 84.29    |
| 100.0E-9                               |                        | 127.13   |
| 1.0E-6                                 |                        | 1.77     |
| 10.0E-6                                |                        | 1.82     |
| <b>ANTAZOLINE PHOSPHATE</b>            |                        |          |
| 10.0E-9                                |                        | 105.22   |
| 100.0E-9                               |                        | 110.12   |
| 1.0E-6                                 |                        | 88.88    |
| 10.0E-6                                |                        | 110.72   |
| <b>ANTHOTHECOL</b>                     |                        |          |
| 10.0E-9                                |                        | 97.60    |
| 100.0E-9                               |                        | 106.85   |
| 1.0E-6                                 |                        | 75.36    |
| 10.0E-6                                |                        | 2.47     |
| <b>ANTHRALIN</b>                       |                        |          |
| 10.0E-9                                |                        | 117.16   |
| 100.0E-9                               |                        | 102.10   |
| 1.0E-6                                 |                        | 77.81    |
| 10.0E-6                                |                        | 79.71    |

| Compounds and Final Concentrations (M) | Average of % Viability | Hits (✓) |
|----------------------------------------|------------------------|----------|
| <b>ANTHRAQUINONE</b>                   |                        |          |
| 10.0E-9                                |                        | 101.17   |
| 100.0E-9                               |                        | 83.38    |
| 1.0E-6                                 |                        | 142.21   |
| 10.0E-6                                |                        | 110.10   |
| <b>ANTIAROL</b>                        |                        |          |
| 10.0E-9                                |                        | 117.85   |
| 100.0E-9                               |                        | 89.28    |
| 1.0E-6                                 |                        | 123.79   |
| 10.0E-6                                |                        | 98.87    |
| <b>ANTIMYCIN A (A1 shown)</b>          |                        |          |
| 10.0E-9                                |                        | 111.96   |
| 100.0E-9                               |                        | 119.02   |
| 1.0E-6                                 |                        | 86.31    |
| 10.0E-6                                |                        | 108.34   |
| <b>ANTIPIRYNE</b>                      |                        |          |
| 10.0E-9                                |                        | 124.98   |
| 100.0E-9                               |                        | 122.06   |
| 1.0E-6                                 |                        | 128.35   |
| 10.0E-6                                |                        | 100.43   |
| <b>APHYLIC ACID</b>                    |                        |          |
| 10.0E-9                                |                        | 112.33   |
| 100.0E-9                               |                        | 86.17    |
| 1.0E-6                                 |                        | 110.69   |
| 10.0E-6                                |                        | 81.87    |
| <b>APIGENIN</b>                        |                        |          |
| 10.0E-9                                |                        | 103.48   |
| 100.0E-9                               |                        | 91.72    |
| 1.0E-6                                 |                        | 92.12    |
| 10.0E-6                                |                        | 129.38   |
| <b>APIGENIN DIMETHYL ETHER</b>         |                        |          |
| 10.0E-9                                |                        | 128.48   |
| 100.0E-9                               |                        | 68.26    |
| 1.0E-6                                 |                        | 111.86   |
| 10.0E-6                                |                        | 88.07    |
| <b>APIIN</b>                           |                        |          |
| 10.0E-9                                |                        | 115.08   |
| 100.0E-9                               |                        | 105.20   |
| 1.0E-6                                 |                        | 111.49   |
| 10.0E-6                                |                        | 128.33   |
| <b>APIOLE</b>                          |                        |          |
| 10.0E-9                                |                        | 99.79    |
| 100.0E-9                               |                        | 98.28    |
| 1.0E-6                                 |                        | 105.39   |
| 10.0E-6                                |                        | 131.53   |
| <b>APOMORPHINE HYDROCHLORIDE</b>       |                        |          |
| 10.0E-9                                |                        | 156.70   |
| 100.0E-9                               |                        | 107.69   |
| 1.0E-6                                 |                        | 113.55   |
| 10.0E-6                                |                        | 123.12   |
| <b>APOTOXICAROL</b>                    |                        |          |
| 10.0E-9                                |                        | 138.09   |
| 100.0E-9                               |                        | 119.94   |
| 1.0E-6                                 |                        | 111.49   |
| 10.0E-6                                |                        | 93.58    |
| <b>APRAMYCIN</b>                       |                        |          |
| 10.0E-9                                |                        | 105.26   |
| 100.0E-9                               |                        | 98.02    |
| 1.0E-6                                 |                        | 110.44   |
| 10.0E-6                                |                        | 70.74    |
| <b>ARABITOL(D)</b>                     |                        |          |
| 10.0E-9                                |                        | 125.20   |
| 100.0E-9                               |                        | 90.60    |
| 1.0E-6                                 |                        | 115.30   |
| 10.0E-6                                |                        | 114.57   |
| <b>ARBUTIN</b>                         |                        |          |
| 10.0E-9                                |                        | 101.61   |
| 100.0E-9                               |                        | 102.83   |
| 1.0E-6                                 |                        | 122.98   |
| 10.0E-6                                |                        | 120.59   |
| <b>ARCAINE SULFATE</b>                 |                        |          |
| 10.0E-9                                |                        | 74.57    |
| 100.0E-9                               |                        | 109.55   |
| 1.0E-6                                 |                        | 88.54    |
| 10.0E-6                                |                        | 92.19    |
| <b>ARGININE HYDROCHLORIDE</b>          |                        |          |
| 10.0E-9                                |                        | 93.47    |
| 100.0E-9                               |                        | 110.25   |
| 1.0E-6                                 |                        | 105.43   |
| 10.0E-6                                |                        | 80.21    |
| <b>ARIPIPIRAZOLE</b>                   |                        |          |
| 10.0E-9                                |                        | 79.73    |
| 100.0E-9                               |                        | 120.17   |
| 1.0E-6                                 |                        | 106.52   |
| 10.0E-6                                |                        | 79.32    |

| Compounds and Final Concentrations (M) | Average of % Viability | Hits (✓) |
|----------------------------------------|------------------------|----------|
| <b>ARMODAFINIL</b>                     |                        |          |
| 10.0E-9                                |                        | 99.93    |
| 100.0E-9                               |                        | 120.74   |
| 1.0E-6                                 |                        | 108.88   |
| 10.0E-6                                |                        | 110.77   |
| <b>ARSANILIC ACID</b>                  |                        |          |
| 10.0E-9                                |                        | 123.06   |
| 100.0E-9                               |                        | 115.42   |
| 1.0E-6                                 |                        | 112.20   |
| 10.0E-6                                |                        | 100.29   |
| <b>ARSENIC TRIOXIDE</b>                |                        |          |
| 10.0E-9                                |                        | 88.02    |
| 100.0E-9                               |                        | 124.19   |
| 1.0E-6                                 |                        | 79.73    |
| 10.0E-6                                |                        | 109.59   |
| <b>ARTEMISIN</b>                       |                        |          |
| 10.0E-9                                |                        | 83.29    |
| 100.0E-9                               |                        | 68.44    |
| 1.0E-6                                 |                        | 117.19   |
| 10.0E-6                                |                        | 77.53    |
| <b>ARTEMISININ</b>                     |                        |          |
| 10.0E-9                                |                        | 101.45   |
| 100.0E-9                               |                        | 73.10    |
| 1.0E-6                                 |                        | 78.88    |
| 10.0E-6                                |                        | 89.50    |
| <b>ARTENIMOL</b>                       |                        |          |
| 10.0E-9                                |                        | 128.64   |
| 100.0E-9                               |                        | 65.71    |
| 1.0E-6                                 |                        | 128.66   |
| 10.0E-6                                |                        | 37.86    |
| <b>ARTHONIOIC ACID</b>                 |                        |          |
| 10.0E-9                                |                        | 109.21   |
| 100.0E-9                               |                        | 111.91   |
| 1.0E-6                                 |                        | 108.95   |
| 10.0E-6                                |                        | 110.04   |
| <b>ASARININ (-)</b>                    |                        |          |
| 10.0E-9                                |                        | 120.58   |
| 100.0E-9                               |                        | 119.00   |
| 1.0E-6                                 |                        | 103.62   |
| 10.0E-6                                |                        | 92.47    |
| <b>ASARYLALDEHYDE</b>                  |                        |          |
| 10.0E-9                                |                        | 79.35    |
| 100.0E-9                               |                        | 109.79   |
| 1.0E-6                                 |                        | 109.57   |
| 10.0E-6                                |                        | 80.24    |
| <b>ASCORBIC ACID</b>                   |                        |          |
| 10.0E-9                                |                        | 97.19    |
| 100.0E-9                               |                        | 111.25   |
| 1.0E-6                                 |                        | 119.16   |
| 10.0E-6                                |                        | 114.49   |
| <b>ASCORBYL PALMITATE</b>              |                        |          |
| 10.0E-9                                |                        | 103.01   |
| 100.0E-9                               |                        | 99.18    |
| 1.0E-6                                 |                        | 89.68    |
| 10.0E-6                                |                        | 110.66   |
| <b>ASIATIC ACID</b>                    |                        |          |
| 10.0E-9                                |                        | 121.71   |
| 100.0E-9                               |                        | 148.48   |
| 1.0E-6                                 |                        | 104.15   |
| 10.0E-6                                |                        | 99.44    |
| <b>ASPARTAME</b>                       |                        |          |
| 10.0E-9                                |                        | 141.35   |
| 100.0E-9                               |                        | 148.24   |
| 1.0E-6                                 |                        | 102.48   |
| 10.0E-6                                |                        | 101.42   |
| <b>ASPIRIN</b>                         |                        |          |
| 10.0E-9                                |                        | 153.18   |
| 100.0E-9                               |                        | 90.75    |
| 1.0E-6                                 |                        | 60.48    |
| 10.0E-6                                |                        | 112.83   |
| <b>ASTAXANTHIN</b>                     |                        |          |
| 10.0E-9                                |                        | 105.57   |
| 100.0E-9                               |                        | 85.32    |
| 1.0E-6                                 |                        | 145.63   |
| 10.0E-6                                |                        | 104.87   |
| <b>ASTEMIZOLE</b>                      |                        |          |
| 10.0E-9                                |                        | 122.98   |
| 100.0E-9                               |                        | 118.59   |
| 1.0E-6                                 |                        | 121.17   |
| 10.0E-6                                |                        | 13.93    |
| <b>ASTRAGALOSIDE IV</b>                |                        |          |
| 10.0E-9                                |                        | 136.36   |
| 100.0E-9                               |                        | 100.59   |
| 1.0E-6                                 |                        | 97.35    |
| 10.0E-6                                |                        | 88.18    |

| Compounds and Final Concentrations (M) | Average of % Viability | Hits (✓) |
|----------------------------------------|------------------------|----------|
| <b>ATENOLOL</b>                        |                        |          |
| 10.0E-9                                |                        | 72.86    |
| 100.0E-9                               |                        | 97.30    |
| 1.0E-6                                 |                        | 111.28   |
| 10.0E-6                                |                        | 124.15   |
| <b>ATOMOXETINE HYDROCHLORIDE</b>       |                        |          |
| 10.0E-9                                |                        | 139.24   |
| 100.0E-9                               |                        | 80.02    |
| 1.0E-6                                 |                        | 97.95    |
| 10.0E-6                                |                        | 108.77   |
| <b>ATORVASTATIN CALCIUM</b>            |                        |          |
| 10.0E-9                                |                        | 110.41   |
| 100.0E-9                               |                        | 100.06   |
| 1.0E-6                                 |                        | 107.95   |
| 10.0E-6                                |                        | 100.38   |
| <b>ATOVAQUONE</b>                      |                        |          |
| 10.0E-9                                |                        | 75.33    |
| 100.0E-9                               |                        | 103.37   |
| 1.0E-6                                 |                        | 132.21   |
| 10.0E-6                                |                        | 110.38   |
| <b>ATRANORIN</b>                       |                        |          |
| 10.0E-9                                |                        | 97.19    |
| 100.0E-9                               |                        | 91.57    |
| 1.0E-6                                 |                        | 103.40   |
| 10.0E-6                                |                        | 103.99   |
| <b>ATROPINE OXIDE</b>                  |                        |          |
| 10.0E-9                                |                        | 122.11   |
| 100.0E-9                               |                        | 114.41   |
| 1.0E-6                                 |                        | 105.02   |
| 10.0E-6                                |                        | 107.61   |
| <b>ATROPINE SULFATE</b>                |                        |          |
| 10.0E-9                                |                        | 147.98   |
| 100.0E-9                               |                        | 131.58   |
| 1.0E-6                                 |                        | 92.88    |
| 10.0E-6                                |                        | 116.92   |
| <b>AURAPTENE</b>                       |                        |          |
| 10.0E-9                                |                        | 87.03    |
| 100.0E-9                               |                        | 145.01   |
| 1.0E-6                                 |                        | 105.29   |
| 10.0E-6                                |                        | 90.66    |
| <b>AURIN TRICARBOXYLIC ACID</b>        |                        |          |
| 10.0E-9                                |                        | 137.67   |
| 100.0E-9                               |                        | 79.72    |
| 1.0E-6                                 |                        | 83.34    |
| 10.0E-6                                |                        | 71.74    |
| <b>AVOBENZONE</b>                      |                        |          |
| 10.0E-9                                |                        | 82.86    |
| 100.0E-9                               |                        | 129.18   |
| 1.0E-6                                 |                        | 101.62   |
| 10.0E-6                                |                        | 70.50    |
| <b>AVOCADANOFURAN</b>                  |                        |          |
| 10.0E-9                                |                        | 108.34   |
| 100.0E-9                               |                        | 100.77   |
| 1.0E-6                                 |                        | 132.92   |
| 10.0E-6                                |                        | 82.07    |
| <b>AVOCADENOFURAN</b>                  |                        |          |
| 10.0E-9                                |                        | 104.59   |
| 100.0E-9                               |                        | 100.01   |
| 1.0E-6                                 |                        | 100.63   |
| 10.0E-6                                |                        | 88.50    |
| <b>AVOCADYNE ACETATE</b>               |                        |          |
| 10.0E-9                                |                        | 88.90    |
| 100.0E-9                               |                        | 125.34   |
| 1.0E-6                                 |                        | 90.81    |
| 10.0E-6                                |                        | 115.77   |
| <b>AVOCATIN A</b>                      |                        |          |
| 10.0E-9                                |                        | 117.69   |
| 100.0E-9                               |                        | 122.56   |
| 1.0E-6                                 |                        | 123.56   |
| 10.0E-6                                |                        | 85.42    |
| <b>AVOCATIN B</b>                      |                        |          |
| 10.0E-9                                |                        | 109.27   |
| 100.0E-9                               |                        | 108.17   |
| 1.0E-6                                 |                        | 133.55   |
| 10.0E-6                                |                        | 125.66   |
| <b>AZACITIDINE</b>                     |                        |          |
| 10.0E-9                                |                        | 120.95   |
| 100.0E-9                               |                        | 135.37   |
| 1.0E-6                                 |                        | 88.84    |
| 10.0E-6                                |                        | 78.18    |
| <b>AZADIRACHTIN</b>                    |                        |          |
| 10.0E-9                                |                        | 103.81   |
| 100.0E-9                               |                        | 131.48   |
| 1.0E-6                                 |                        | 110.21   |
| 10.0E-6                                |                        | 100.45   |

| Compounds and Final Concentrations (M) | Average of % Viability | Hits (✓) |
|----------------------------------------|------------------------|----------|
| <b>AZAPERONE</b>                       |                        |          |
| 10.0E-9                                |                        | 99.08    |
| 100.0E-9                               |                        | 100.38   |
| 1.0E-6                                 |                        | 104.97   |
| 10.0E-6                                |                        | 99.34    |
| <b>AZASERINE</b>                       |                        |          |
| 10.0E-9                                |                        | 102.44   |
| 100.0E-9                               |                        | 138.28   |
| 1.0E-6                                 |                        | 106.94   |
| 10.0E-6                                |                        | 111.84   |
| <b>AZATHIOPRINE</b>                    |                        |          |
| 10.0E-9                                |                        | 102.25   |
| 100.0E-9                               |                        | 153.57   |
| 1.0E-6                                 |                        | 110.48   |
| 10.0E-6                                |                        | 84.88    |
| <b>AZELAIC ACID</b>                    |                        |          |
| 10.0E-9                                |                        | 86.48    |
| 100.0E-9                               |                        | 114.07   |
| 1.0E-6                                 |                        | 68.41    |
| 10.0E-6                                |                        | 123.71   |
| <b>AZELASTINE HYDROCHLORIDE</b>        |                        |          |
| 10.0E-9                                |                        | 112.18   |
| 100.0E-9                               |                        | 102.91   |
| 1.0E-6                                 |                        | 97.65    |
| 10.0E-6                                |                        | 58.75    |
| <b>AZITHROMYCIN</b>                    |                        |          |
| 10.0E-9                                |                        | 115.92   |
| 100.0E-9                               |                        | 127.82   |
| 1.0E-6                                 |                        | 182.55   |
| 10.0E-6                                |                        | 129.41   |
| <b>AZLOCILLIN SODIUM</b>               |                        |          |
| 10.0E-9                                |                        | 121.58   |
| 100.0E-9                               |                        | 86.64    |
| 1.0E-6                                 |                        | 102.88   |
| 10.0E-6                                |                        | 91.10    |
| <b>AZO BENZENE</b>                     |                        |          |
| 10.0E-9                                |                        | 117.30   |
| 100.0E-9                               |                        | 101.04   |
| 1.0E-6                                 |                        | 67.96    |
| 10.0E-6                                |                        | 94.23    |
| <b>AZTREONAM</b>                       |                        |          |
| 10.0E-9                                |                        | 59.05    |
| 100.0E-9                               |                        | 89.00    |
| 1.0E-6                                 |                        | 133.15   |
| 10.0E-6                                |                        | 115.87   |
| <b>BACAMPICILLIN HYDROCHLORIDE</b>     |                        |          |
| 10.0E-9                                |                        | 110.74   |
| 100.0E-9                               |                        | 123.17   |
| 1.0E-6                                 |                        | 108.58   |
| 10.0E-6                                |                        | 97.60    |
| <b>BACCATIN III</b>                    |                        |          |
| 10.0E-9                                |                        | 116.32   |
| 100.0E-9                               |                        | 99.64    |
| 1.0E-6                                 |                        | 109.67   |
| 10.0E-6                                |                        | 104.82   |
| <b>BACITRACIN</b>                      |                        |          |
| 10.0E-9                                |                        | 144.55   |
| 100.0E-9                               |                        | 123.93   |
| 1.0E-6                                 |                        | 75.01    |
| 10.0E-6                                |                        | 124.22   |
| <b>BACLOFEN</b>                        |                        |          |
| 10.0E-9                                |                        | 97.39    |
| 100.0E-9                               |                        | 133.66   |
| 1.0E-6                                 |                        | 93.28    |
| 10.0E-6                                |                        | 109.65   |
| <b>BAICALEIN</b>                       |                        |          |
| 10.0E-9                                |                        | 95.75    |
| 100.0E-9                               |                        | 137.42   |
| 1.0E-6                                 |                        | 97.35    |
| 10.0E-6                                |                        | 57.55    |
| <b>BAMBUTEROL HYDROCHLORIDE</b>        |                        |          |
| 10.0E-9                                |                        | 125.73   |
| 100.0E-9                               |                        | 136.96   |
| 1.0E-6                                 |                        | 122.87   |
| 10.0E-6                                |                        | 95.86    |
| <b>BARBITAL</b>                        |                        |          |
| 10.0E-9                                |                        | 111.13   |
| 100.0E-9                               |                        | 127.60   |
| 1.0E-6                                 |                        | 114.83   |
| 10.0E-6                                |                        | 114.45   |
| <b>BATYL ALCOHOL</b>                   |                        |          |
| 10.0E-9                                |                        | 98.94    |
| 100.0E-9                               |                        | 123.85   |
| 1.0E-6                                 |                        | 99.32    |
| 10.0E-6                                |                        | 106.50   |

| Compounds and Final Concentrations (M) |  | Average of % Viability | Hits (✓) |
|----------------------------------------|--|------------------------|----------|
| Row Labels                             |  |                        |          |
| <b>BECLAMIDE</b>                       |  |                        |          |
| 10.0E-9                                |  | 120.31                 |          |
| 100.0E-9                               |  | 145.48                 |          |
| 1.0E-6                                 |  | 127.51                 |          |
| 10.0E-6                                |  | 89.72                  |          |
| <b>BECLOMETHASONE DIPROPIONATE</b>     |  |                        |          |
| 10.0E-9                                |  | 81.70                  |          |
| 100.0E-9                               |  | 126.36                 |          |
| 1.0E-6                                 |  | 101.82                 |          |
| 10.0E-6                                |  | 87.97                  |          |
| <b>BEKANAMYCIN SULFATE</b>             |  |                        |          |
| 10.0E-9                                |  | 131.65                 |          |
| 100.0E-9                               |  | 142.14                 |          |
| 1.0E-6                                 |  | 134.45                 |          |
| 10.0E-6                                |  | 117.45                 |          |
| <b>BENZAEPRILOL HYDROCHLORIDE</b>      |  |                        |          |
| 10.0E-9                                |  | 88.10                  |          |
| 100.0E-9                               |  | 106.38                 |          |
| 1.0E-6                                 |  | 84.08                  |          |
| 10.0E-6                                |  | 112.86                 |          |
| <b>BENDROFLUMETHIAZIDE</b>             |  |                        |          |
| 10.0E-9                                |  | 92.09                  |          |
| 100.0E-9                               |  | 128.50                 |          |
| 1.0E-6                                 |  | 100.21                 |          |
| 10.0E-6                                |  | 145.98                 |          |
| <b>BENFLUOREX HYDROCHLORIDE</b>        |  |                        |          |
| 10.0E-9                                |  | 132.26                 |          |
| 100.0E-9                               |  | 97.15                  |          |
| 1.0E-6                                 |  | 119.79                 |          |
| 10.0E-6                                |  | 140.55                 |          |
| <b>BENFOTIAMINE</b>                    |  |                        |          |
| 10.0E-9                                |  | 79.71                  |          |
| 100.0E-9                               |  | 126.10                 |          |
| 1.0E-6                                 |  | 111.22                 |          |
| 10.0E-6                                |  | 53.23                  |          |
| <b>BENSERAZIDE HYDROCHLORIDE</b>       |  |                        |          |
| 10.0E-9                                |  | 83.59                  |          |
| 100.0E-9                               |  | 110.22                 |          |
| 1.0E-6                                 |  | 113.15                 |          |
| 10.0E-6                                |  | 94.17                  |          |
| <b>BENURESTAT</b>                      |  |                        |          |
| 10.0E-9                                |  | 90.15                  |          |
| 100.0E-9                               |  | 77.89                  |          |
| 1.0E-6                                 |  | 104.26                 |          |
| 10.0E-6                                |  | 126.52                 |          |
| <b>BENZALKONIUM CHLORIDE</b>           |  |                        |          |
| 10.0E-9                                |  | 77.57                  |          |
| 100.0E-9                               |  | 118.12                 |          |
| 1.0E-6                                 |  | 81.43                  |          |
| 10.0E-6                                |  | 95.19                  |          |
| <b>BENZBROMARONE</b>                   |  |                        |          |
| 10.0E-9                                |  | 116.52                 |          |
| 100.0E-9                               |  | 122.75                 |          |
| 1.0E-6                                 |  | 81.63                  |          |
| 10.0E-6                                |  | 102.13                 |          |
| <b>BENZETHONIUM CHLORIDE</b>           |  |                        |          |
| 10.0E-9                                |  | 74.41                  |          |
| 100.0E-9                               |  | 140.65                 |          |
| 1.0E-6                                 |  | 99.68                  |          |
| 10.0E-6                                |  | 77.61                  |          |
| <b>BENZOCAINE</b>                      |  |                        |          |
| 10.0E-9                                |  | 162.44                 |          |
| 100.0E-9                               |  | 133.61                 |          |
| 1.0E-6                                 |  | 84.75                  |          |
| 10.0E-6                                |  | 136.53                 |          |
| <b>BENZOIC ACID</b>                    |  |                        |          |
| 10.0E-9                                |  | 100.41                 |          |
| 100.0E-9                               |  | 112.59                 |          |
| 1.0E-6                                 |  | 117.84                 |          |
| 10.0E-6                                |  | 86.45                  |          |
| <b>BENZOXIQUINE</b>                    |  |                        |          |
| 10.0E-9                                |  | 102.19                 |          |
| 100.0E-9                               |  | 94.10                  |          |
| 1.0E-6                                 |  | 87.60                  |          |
| 10.0E-6                                |  | 86.09                  |          |
| <b>BENZOYL PEROXIDE</b>                |  |                        |          |
| 10.0E-9                                |  | 99.25                  |          |
| 100.0E-9                               |  | 100.53                 |          |
| 1.0E-6                                 |  | 113.17                 |          |
| 10.0E-6                                |  | 78.65                  |          |
| <b>BENZOYLPAS</b>                      |  |                        |          |
| 10.0E-9                                |  | 80.43                  |          |
| 100.0E-9                               |  | 120.62                 |          |
| 1.0E-6                                 |  | 111.58                 |          |
| 10.0E-6                                |  | 77.74                  |          |

| Compounds and Final Concentrations (M) | Average of % Viability | Hits (✓) |
|----------------------------------------|------------------------|----------|
| <b>BENZTHIAZIDE</b>                    |                        |          |
| 10.0E-9                                |                        | 93.30    |
| 100.0E-9                               |                        | 124.91   |
| 1.0E-6                                 |                        | 116.22   |
| 10.0E-6                                |                        | 120.07   |
| <b>BENZYDAMINE HYDROCHLORIDE</b>       |                        |          |
| 10.0E-9                                |                        | 122.17   |
| 100.0E-9                               |                        | 145.64   |
| 1.0E-6                                 |                        | 89.60    |
| 10.0E-6                                |                        | 80.30    |
| <b>BENZYL BENZOATE</b>                 |                        |          |
| 10.0E-9                                |                        | 120.45   |
| 100.0E-9                               |                        | 150.57   |
| 1.0E-6                                 |                        | 117.66   |
| 10.0E-6                                |                        | 79.88    |
| <b>BENZYL ISOTHIOCYANATE</b>           |                        |          |
| 10.0E-9                                |                        | 73.62    |
| 100.0E-9                               |                        | 123.92   |
| 1.0E-6                                 |                        | 96.62    |
| 10.0E-6                                |                        | 90.09    |
| <b>BEPHENIUM HYDROXYNAPHTHOATE</b>     |                        |          |
| 10.0E-9                                |                        | 84.39    |
| 100.0E-9                               |                        | 84.05    |
| 1.0E-6                                 |                        | 132.43   |
| 10.0E-6                                |                        | 73.54    |
| <b>BEPRIDIL HYDROCHLORIDE</b>          |                        |          |
| 10.0E-9                                |                        | 113.81   |
| 100.0E-9                               |                        | 117.31   |
| 1.0E-6                                 |                        | 164.91   |
| 10.0E-6                                |                        | 128.58   |
| <b>BERBAMINE HYDROCHLORIDE</b>         |                        |          |
| 10.0E-9                                |                        | 97.18    |
| 100.0E-9                               |                        | 118.42   |
| 1.0E-6                                 |                        | 129.14   |
| 10.0E-6                                |                        | 30.91    |
| <b>BERBERINE CHLORIDE</b>              |                        |          |
| 10.0E-9                                |                        | 72.68    |
| 100.0E-9                               |                        | 139.02   |
| 1.0E-6                                 |                        | 94.76    |
| 10.0E-6                                |                        | 67.85    |
| <b>BERGENIN</b>                        |                        |          |
| 10.0E-9                                |                        | 137.10   |
| 100.0E-9                               |                        | 73.96    |
| 1.0E-6                                 |                        | 135.14   |
| 10.0E-6                                |                        | 132.10   |
| <b>beta-AMYRIN</b>                     |                        |          |
| 10.0E-9                                |                        | 99.59    |
| 100.0E-9                               |                        | 107.71   |
| 1.0E-6                                 |                        | 82.54    |
| 10.0E-6                                |                        | 122.10   |
| <b>beta-AMYRIN ACETATE</b>             |                        |          |
| 10.0E-9                                |                        | 105.56   |
| 100.0E-9                               |                        | 81.63    |
| 1.0E-6                                 |                        | 118.73   |
| 10.0E-6                                |                        | 93.40    |
| <b>beta-CAROTENE</b>                   |                        |          |
| 10.0E-9                                |                        | 112.18   |
| 100.0E-9                               |                        | 125.66   |
| 1.0E-6                                 |                        | 108.88   |
| 10.0E-6                                |                        | 106.61   |
| <b>beta-CARYOPHYLLENE ALCOHOL</b>      |                        |          |
| 10.0E-9                                |                        | 155.44   |
| 100.0E-9                               |                        | 168.10   |
| 1.0E-6                                 |                        | 89.76    |
| 10.0E-6                                |                        | 134.46   |
| <b>beta-ESCIN</b>                      |                        |          |
| 10.0E-9                                |                        | 113.12   |
| 100.0E-9                               |                        | 112.09   |
| 1.0E-6                                 |                        | 98.34    |
| 10.0E-6                                |                        | 124.38   |
| <b>BETAHISTINE HYDROCHLORIDE</b>       |                        |          |
| 10.0E-9                                |                        | 98.39    |
| 100.0E-9                               |                        | 108.29   |
| 1.0E-6                                 |                        | 104.78   |
| 10.0E-6                                |                        | 95.38    |
| <b>BETAINE HYDROCHLORIDE</b>           |                        |          |
| 10.0E-9                                |                        | 129.57   |
| 100.0E-9                               |                        | 139.59   |
| 1.0E-6                                 |                        | 103.03   |
| 10.0E-6                                |                        | 93.01    |
| <b>BETAMETHASONE</b>                   |                        |          |
| 10.0E-9                                |                        | 117.15   |
| 100.0E-9                               |                        | 153.31   |
| 1.0E-6                                 |                        | 95.95    |
| 10.0E-6                                |                        | 93.15    |

| Compounds and Final Concentrations (M)  | Average of % Viability | Hits (✓) |
|-----------------------------------------|------------------------|----------|
| <b>BETAMETHASONE 17,21-DIPROPIONATE</b> |                        |          |
| 10.0E-9                                 |                        | 120.62   |
| 100.0E-9                                |                        | 100.04   |
| 1.0E-6                                  |                        | 83.99    |
| 10.0E-6                                 |                        | 101.52   |
| <b>BETAMETHASONE ACETATE</b>            |                        |          |
| 10.0E-9                                 |                        | 84.78    |
| 100.0E-9                                |                        | 96.83    |
| 1.0E-6                                  |                        | 80.64    |
| 10.0E-6                                 |                        | 81.46    |
| <b>BETAMETHASONE VALERATE</b>           |                        |          |
| 10.0E-9                                 |                        | 124.68   |
| 100.0E-9                                |                        | 124.54   |
| 1.0E-6                                  |                        | 116.22   |
| 10.0E-6                                 |                        | 108.65   |
| <b>BETAMETHAZONE SODIUM PHOSPHATE</b>   |                        |          |
| 10.0E-9                                 |                        | 81.57    |
| 100.0E-9                                |                        | 108.22   |
| 1.0E-6                                  |                        | 119.17   |
| 10.0E-6                                 |                        | 66.62    |
| <b>BETAMIPRON</b>                       |                        |          |
| 10.0E-9                                 |                        | 135.25   |
| 100.0E-9                                |                        | 96.94    |
| 1.0E-6                                  |                        | 115.03   |
| 10.0E-6                                 |                        | 132.36   |
| <b>beta-NAPHTHOL</b>                    |                        |          |
| 10.0E-9                                 |                        | 83.40    |
| 100.0E-9                                |                        | 103.58   |
| 1.0E-6                                  |                        | 77.00    |
| 10.0E-6                                 |                        | 103.61   |
| <b>beta-PELTATIN</b>                    |                        |          |
| 10.0E-9                                 |                        | 89.06    |
| 100.0E-9                                |                        | 103.09   |
| 1.0E-6                                  |                        | 46.22    |
| 10.0E-6                                 |                        | 51.78    |
| <b>BETA-PROPIOLACTONE</b>               |                        |          |
| 10.0E-9                                 |                        | 114.10   |
| 100.0E-9                                |                        | 100.60   |
| 1.0E-6                                  |                        | 96.86    |
| 10.0E-6                                 |                        | 85.65    |
| <b>beta-TOXICAROL</b>                   |                        |          |
| 10.0E-9                                 |                        | 67.40    |
| 100.0E-9                                |                        | 99.54    |
| 1.0E-6                                  |                        | 77.64    |
| 10.0E-6                                 |                        | 63.47    |
| <b>BETHANECHOL CHLORIDE</b>             |                        |          |
| 10.0E-9                                 |                        | 113.29   |
| 100.0E-9                                |                        | 126.46   |
| 1.0E-6                                  |                        | 105.68   |
| 10.0E-6                                 |                        | 134.49   |
| <b>BETULIN</b>                          |                        |          |
| 10.0E-9                                 |                        | 57.23    |
| 100.0E-9                                |                        | 95.38    |
| 1.0E-6                                  |                        | 77.17    |
| 10.0E-6                                 |                        | 109.40   |
| <b>BETULINIC ACID</b>                   |                        |          |
| 10.0E-9                                 |                        | 71.76    |
| 100.0E-9                                |                        | 78.25    |
| 1.0E-6                                  |                        | 120.83   |
| 10.0E-6                                 |                        | 88.97    |
| <b>BEZAFIBRATE</b>                      |                        |          |
| 10.0E-9                                 |                        | 144.33   |
| 100.0E-9                                |                        | 111.09   |
| 1.0E-6                                  |                        | 112.88   |
| 10.0E-6                                 |                        | 102.48   |
| <b>BICUCULLINE (+)</b>                  |                        |          |
| 10.0E-9                                 |                        | 75.53    |
| 100.0E-9                                |                        | 87.76    |
| 1.0E-6                                  |                        | 70.32    |
| 10.0E-6                                 |                        | 75.76    |
| <b>BICUCULLINE(-) METHIODIDE</b>        |                        |          |
| 10.0E-9                                 |                        | 132.82   |
| 100.0E-9                                |                        | 132.25   |
| 1.0E-6                                  |                        | 121.74   |
| 10.0E-6                                 |                        | 123.49   |
| <b>BIFONAZOLE</b>                       |                        |          |
| 10.0E-9                                 |                        | 118.25   |
| 100.0E-9                                |                        | 96.63    |
| 1.0E-6                                  |                        | 73.23    |
| 10.0E-6                                 |                        | 73.47    |
| <b>BILIRUBIN</b>                        |                        |          |
| 10.0E-9                                 |                        | 80.15    |
| 100.0E-9                                |                        | 82.48    |
| 1.0E-6                                  |                        | 84.78    |
| 10.0E-6                                 |                        | 80.21    |



| Compounds and Final Concentrations (M)     | Average of % Viability | Hits (✓) |
|--------------------------------------------|------------------------|----------|
| <b>BIOCHANIN A</b>                         |                        |          |
| 10.0E-9                                    |                        | 117.81   |
| 100.0E-9                                   |                        | 95.09    |
| 1.0E-6                                     |                        | 106.16   |
| 10.0E-6                                    |                        | 124.38   |
| <b>BIOTIN</b>                              |                        |          |
| 10.0E-9                                    |                        | 86.98    |
| 100.0E-9                                   |                        | 105.75   |
| 1.0E-6                                     |                        | 100.56   |
| 10.0E-6                                    |                        | 87.99    |
| <b>BIPERIDEN</b>                           |                        |          |
| 10.0E-9                                    |                        | 146.68   |
| 100.0E-9                                   |                        | 111.92   |
| 1.0E-6                                     |                        | 88.40    |
| 10.0E-6                                    |                        | 111.85   |
| <b>BISACODYL</b>                           |                        |          |
| 10.0E-9                                    |                        | 108.33   |
| 100.0E-9                                   |                        | 133.76   |
| 1.0E-6                                     |                        | 95.95    |
| 10.0E-6                                    |                        | 82.85    |
| <b>BISANHYDRORUTILANTINONE</b>             |                        |          |
| 10.0E-9                                    |                        | 83.34    |
| 100.0E-9                                   |                        | 77.48    |
| 1.0E-6                                     |                        | 128.42   |
| 10.0E-6                                    |                        | 104.40   |
| <b>BISMUTH SUBSALICYLATE</b>               |                        |          |
| 10.0E-9                                    |                        | 156.28   |
| 100.0E-9                                   |                        | 93.70    |
| 1.0E-6                                     |                        | 93.60    |
| 10.0E-6                                    |                        | 104.64   |
| <b>BISOPROLOL FUMARATE</b>                 |                        |          |
| 10.0E-9                                    |                        | 84.91    |
| 100.0E-9                                   |                        | 76.63    |
| 1.0E-6                                     |                        | 119.34   |
| 10.0E-6                                    |                        | 120.51   |
| <b>BISPHENOL A</b>                         |                        |          |
| 10.0E-9                                    |                        | 128.33   |
| 100.0E-9                                   |                        | 117.09   |
| 1.0E-6                                     |                        | 91.41    |
| 10.0E-6                                    |                        | 120.67   |
| <b>BISSALICYL FUMARATE</b>                 |                        |          |
| 10.0E-9                                    |                        | 101.22   |
| 100.0E-9                                   |                        | 100.23   |
| 1.0E-6                                     |                        | 128.48   |
| 10.0E-6                                    |                        | 85.64    |
| <b>BITHIONATE SODIUM</b>                   |                        |          |
| 10.0E-9                                    |                        | 140.78   |
| 100.0E-9                                   |                        | 119.02   |
| 1.0E-6                                     |                        | 88.75    |
| 10.0E-6                                    |                        | 98.32    |
| <b>BITOSCANATE</b>                         |                        |          |
| 10.0E-9                                    |                        | 103.76   |
| 100.0E-9                                   |                        | 101.04   |
| 1.0E-6                                     |                        | 114.61   |
| 10.0E-6                                    |                        | 111.31   |
| <b>BIXIN</b>                               |                        |          |
| 10.0E-9                                    |                        | 145.87   |
| 100.0E-9                                   |                        | 96.41    |
| 1.0E-6                                     |                        | 93.77    |
| 10.0E-6                                    |                        | 81.18    |
| <b>BLEOMYCIN (bleomycin B2 shown)</b>      |                        |          |
| 10.0E-9                                    |                        | 99.06    |
| 100.0E-9                                   |                        | 94.22    |
| 1.0E-6                                     |                        | 82.38    |
| 10.0E-6                                    |                        | 77.31    |
| <b>BOLDINE</b>                             |                        |          |
| 10.0E-9                                    |                        | 119.82   |
| 100.0E-9                                   |                        | 96.79    |
| 1.0E-6                                     |                        | 134.99   |
| 10.0E-6                                    |                        | 139.26   |
| <b>BOVINOCIDIN (3-nitropropionic acid)</b> |                        |          |
| 10.0E-9                                    |                        | 97.58    |
| 100.0E-9                                   |                        | 77.19    |
| 1.0E-6                                     |                        | 96.51    |
| 10.0E-6                                    |                        | 71.57    |
| <b>BRAZILEIN</b>                           |                        |          |
| 10.0E-9                                    |                        | 95.65    |
| 100.0E-9                                   |                        | 108.25   |
| 1.0E-6                                     |                        | 113.18   |
| 10.0E-6                                    |                        | 117.85   |
| <b>BRAZILIN</b>                            |                        |          |
| 10.0E-9                                    |                        | 110.14   |
| 100.0E-9                                   |                        | 114.35   |
| 1.0E-6                                     |                        | 82.42    |
| 10.0E-6                                    |                        | 117.39   |

| Compounds and Final Concentrations (M)                         | Average of % Viability | Hits (✓) |
|----------------------------------------------------------------|------------------------|----------|
| <b>BRETYLIUM TOSYLATE</b>                                      |                        |          |
| 10.0E-9                                                        |                        | 100.67   |
| 100.0E-9                                                       |                        | 111.14   |
| 1.0E-6                                                         |                        | 112.73   |
| 10.0E-6                                                        |                        | 92.42    |
| <b>BROMHEXINE HYDROCHLORIDE</b>                                |                        |          |
| 10.0E-9                                                        |                        | 110.90   |
| 100.0E-9                                                       |                        | 132.91   |
| 1.0E-6                                                         |                        | 143.05   |
| 10.0E-6                                                        |                        | 84.15    |
| <b>BROMINDIONE</b>                                             |                        |          |
| 10.0E-9                                                        |                        | 90.50    |
| 100.0E-9                                                       |                        | 104.85   |
| 1.0E-6                                                         |                        | 81.52    |
| 10.0E-6                                                        |                        | 97.17    |
| <b>BROMO-3-HYDROXY-4-(SUCCIN-2-YL)-CARYOLANE gamma-LACTONE</b> |                        |          |
| 10.0E-9                                                        |                        | 76.53    |
| 100.0E-9                                                       |                        | 105.76   |
| 1.0E-6                                                         |                        | 72.18    |
| 10.0E-6                                                        |                        | 98.57    |
| <b>BROMOCRIPTINE MESYLATE</b>                                  |                        |          |
| 10.0E-9                                                        |                        | 104.34   |
| 100.0E-9                                                       |                        | 127.41   |
| 1.0E-6                                                         |                        | 89.82    |
| 10.0E-6                                                        |                        | 92.13    |
| <b>BROMOPRIDE</b>                                              |                        |          |
| 10.0E-9                                                        |                        | 104.54   |
| 100.0E-9                                                       |                        | 110.12   |
| 1.0E-6                                                         |                        | 93.00    |
| 10.0E-6                                                        |                        | 128.62   |
| <b>BROMPERIDOL</b>                                             |                        |          |
| 10.0E-9                                                        |                        | 113.77   |
| 100.0E-9                                                       |                        | 116.06   |
| 1.0E-6                                                         |                        | 104.92   |
| 10.0E-6                                                        |                        | 91.44    |
| <b>BROMPHENIRAMINE MALEATE</b>                                 |                        |          |
| 10.0E-9                                                        |                        | 96.86    |
| 100.0E-9                                                       |                        | 95.16    |
| 1.0E-6                                                         |                        | 89.19    |
| 10.0E-6                                                        |                        | 82.96    |
| <b>BRXYQUINOLINE</b>                                           |                        |          |
| 10.0E-9                                                        |                        | 88.07    |
| 100.0E-9                                                       |                        | 106.15   |
| 1.0E-6                                                         |                        | 104.63   |
| 10.0E-6                                                        |                        | 72.21    |
| <b>BRUCINE</b>                                                 |                        |          |
| 10.0E-9                                                        |                        | 111.74   |
| 100.0E-9                                                       |                        | 101.77   |
| 1.0E-6                                                         |                        | 97.16    |
| 10.0E-6                                                        |                        | 101.96   |
| <b>BUCETIN</b>                                                 |                        |          |
| 10.0E-9                                                        |                        | 152.56   |
| 100.0E-9                                                       |                        | 105.41   |
| 1.0E-6                                                         |                        | 122.67   |
| 10.0E-6                                                        |                        | 130.83   |
| <b>BUCLADESINE</b>                                             |                        |          |
| 10.0E-9                                                        |                        | 102.18   |
| 100.0E-9                                                       |                        | 91.48    |
| 1.0E-6                                                         |                        | 92.58    |
| 10.0E-6                                                        |                        | 103.00   |
| <b>BUDESONIDE</b>                                              |                        |          |
| 10.0E-9                                                        |                        | 70.62    |
| 100.0E-9                                                       |                        | 109.10   |
| 1.0E-6                                                         |                        | 118.21   |
| 10.0E-6                                                        |                        | 114.16   |
| <b>BUFEXAMAC</b>                                               |                        |          |
| 10.0E-9                                                        |                        | 80.53    |
| 100.0E-9                                                       |                        | 78.27    |
| 1.0E-6                                                         |                        | 133.27   |
| 10.0E-6                                                        |                        | 95.95    |
| <b>BUFLOMEDIL HYDROCHLORIDE</b>                                |                        |          |
| 10.0E-9                                                        |                        | 126.77   |
| 100.0E-9                                                       |                        | 117.43   |
| 1.0E-6                                                         |                        | 112.74   |
| 10.0E-6                                                        |                        | 126.95   |
| <b>BUMETANIDE</b>                                              |                        |          |
| 10.0E-9                                                        |                        | 116.27   |
| 100.0E-9                                                       |                        | 69.02    |
| 1.0E-6                                                         |                        | 135.29   |
| 10.0E-6                                                        |                        | 104.49   |
| <b>BUPIVACAINE HYDROCHLORIDE</b>                               |                        |          |
| 10.0E-9                                                        |                        | 62.21    |
| 100.0E-9                                                       |                        | 105.57   |
| 1.0E-6                                                         |                        | 125.16   |
| 10.0E-6                                                        |                        | 75.84    |

| Compounds and Final Concentrations (M) | Average of % Viability | Hits (✓) |
|----------------------------------------|------------------------|----------|
| <b>Row Labels</b>                      |                        |          |
| <b>BUPROPION</b>                       |                        |          |
| 10.0E-9                                |                        | 110.02   |
| 100.0E-9                               |                        | 101.94   |
| 1.0E-6                                 |                        | 93.42    |
| 10.0E-6                                |                        | 93.84    |
| <b>BUSPIRON HYDROCHLORIDE</b>          |                        |          |
| 10.0E-9                                |                        | 94.38    |
| 100.0E-9                               |                        | 114.36   |
| 1.0E-6                                 |                        | 98.15    |
| 10.0E-6                                |                        | 117.30   |
| <b>BUSSEIN</b>                         |                        |          |
| 10.0E-9                                |                        | 83.26    |
| 100.0E-9                               |                        | 102.44   |
| 1.0E-6                                 |                        | 85.07    |
| 10.0E-6                                |                        | 73.74    |
| <b>BUSULFAN</b>                        |                        |          |
| 10.0E-9                                |                        | 154.28   |
| 100.0E-9                               |                        | 104.30   |
| 1.0E-6                                 |                        | 94.22    |
| 10.0E-6                                |                        | 83.84    |
| <b>BUTACAINE</b>                       |                        |          |
| 10.0E-9                                |                        | 110.77   |
| 100.0E-9                               |                        | 112.92   |
| 1.0E-6                                 |                        | 105.41   |
| 10.0E-6                                |                        | 68.72    |
| <b>BUTAMBEN</b>                        |                        |          |
| 10.0E-9                                |                        | 134.22   |
| 100.0E-9                               |                        | 80.53    |
| 1.0E-6                                 |                        | 125.41   |
| 10.0E-6                                |                        | 106.74   |
| <b>BUTOCONAZOLE</b>                    |                        |          |
| 10.0E-9                                |                        | 108.71   |
| 100.0E-9                               |                        | 108.50   |
| 1.0E-6                                 |                        | 78.39    |
| 10.0E-6                                |                        | 85.12    |
| <b>BUTYL PARABEN</b>                   |                        |          |
| 10.0E-9                                |                        | 114.70   |
| 100.0E-9                               |                        | 98.24    |
| 1.0E-6                                 |                        | 95.69    |
| 10.0E-6                                |                        | 96.44    |
| <b>BUTYLATED HYDROXYTOLUENE</b>        |                        |          |
| 10.0E-9                                |                        | 101.53   |
| 100.0E-9                               |                        | 84.40    |
| 1.0E-6                                 |                        | 96.56    |
| 10.0E-6                                |                        | 139.05   |
| <b>CACODYLIC ACID</b>                  |                        |          |
| 10.0E-9                                |                        | 99.43    |
| 100.0E-9                               |                        | 118.02   |
| 1.0E-6                                 |                        | 99.26    |
| 10.0E-6                                |                        | 84.47    |
| <b>CADAVERINE TARTRATE</b>             |                        |          |
| 10.0E-9                                |                        | 121.90   |
| 100.0E-9                               |                        | 112.52   |
| 1.0E-6                                 |                        | 105.22   |
| 10.0E-6                                |                        | 64.01    |
| <b>CADIN-4-EN-10-OL</b>                |                        |          |
| 10.0E-9                                |                        | 107.24   |
| 100.0E-9                               |                        | 129.16   |
| 1.0E-6                                 |                        | 98.38    |
| 10.0E-6                                |                        | 84.32    |
| <b>CAFESTOL</b>                        |                        |          |
| 10.0E-9                                |                        | 102.69   |
| 100.0E-9                               |                        | 108.25   |
| 1.0E-6                                 |                        | 136.57   |
| 10.0E-6                                |                        | 99.61    |
| <b>CAFESTOL ACETATE</b>                |                        |          |
| 10.0E-9                                |                        | 113.32   |
| 100.0E-9                               |                        | 94.20    |
| 1.0E-6                                 |                        | 106.88   |
| 10.0E-6                                |                        | 105.71   |
| <b>CAFFEIC ACID</b>                    |                        |          |
| 10.0E-9                                |                        | 102.06   |
| 100.0E-9                               |                        | 115.60   |
| 1.0E-6                                 |                        | 75.93    |
| 10.0E-6                                |                        | 97.76    |
| <b>CAFFEINE</b>                        |                        |          |
| 10.0E-9                                |                        | 134.94   |
| 100.0E-9                               |                        | 129.59   |
| 1.0E-6                                 |                        | 103.95   |
| 10.0E-6                                |                        | 121.02   |
| <b>CALCIUM GLUCEPTATE</b>              |                        |          |
| 10.0E-9                                |                        | 106.98   |
| 100.0E-9                               |                        | 96.24    |
| 1.0E-6                                 |                        | 82.64    |
| 10.0E-6                                |                        | 128.55   |

| Compounds and Final Concentrations (M) | Average of % Viability | Hits (✓) |
|----------------------------------------|------------------------|----------|
| <b>CAMPBOR (1R)</b>                    |                        |          |
| 10.0E-9                                | ✓                      | 111.74   |
| 100.0E-9                               | ✓                      | 109.78   |
| 1.0E-6                                 | ✓                      | 119.42   |
| 10.0E-6                                | ✓                      | 120.01   |
| <b>CAMPTOTHECIN</b>                    |                        | ✓        |
| 10.0E-9                                | ✓                      | 106.47   |
| 100.0E-9                               | ✓                      | 95.73    |
| 1.0E-6                                 | ✓                      | 63.83    |
| 10.0E-6                                | ✓                      | 41.83    |
| <b>CAMYLOFINE DIHYDROCHLORIDE</b>      |                        |          |
| 10.0E-9                                | ✓                      | 85.74    |
| 100.0E-9                               | ✓                      | 85.05    |
| 1.0E-6                                 | ✓                      | 113.69   |
| 10.0E-6                                | ✓                      | 112.17   |
| <b>CANAVANINE</b>                      |                        |          |
| 10.0E-9                                | ✓                      | 111.06   |
| 100.0E-9                               | ✓                      | 115.04   |
| 1.0E-6                                 | ✓                      | 90.99    |
| 10.0E-6                                | ✓                      | 85.55    |
| <b>CANDESARTAN CILEXTEL</b>            |                        |          |
| 10.0E-9                                | ✓                      | 110.64   |
| 100.0E-9                               | ✓                      | 124.98   |
| 1.0E-6                                 | ✓                      | 67.02    |
| 10.0E-6                                | ✓                      | 120.02   |
| <b>CANRENOIC ACID, POTASSIUM SALT</b>  |                        |          |
| 10.0E-9                                | ✓                      | 104.70   |
| 100.0E-9                               | ✓                      | 99.59    |
| 1.0E-6                                 | ✓                      | 96.49    |
| 10.0E-6                                | ✓                      | 89.64    |
| <b>CANRENONE</b>                       |                        |          |
| 10.0E-9                                | ✓                      | 123.67   |
| 100.0E-9                               | ✓                      | 111.65   |
| 1.0E-6                                 | ✓                      | 103.95   |
| 10.0E-6                                | ✓                      | 130.35   |
| <b>CANTHARIDIN</b>                     |                        | ✓        |
| 10.0E-9                                | ✓                      | 110.26   |
| 100.0E-9                               | ✓                      | 112.99   |
| 1.0E-6                                 | ✓                      | 78.92    |
| 10.0E-6                                | ✓                      | 6.72     |
| <b>CANTHAXANTHIN (euglenanone)</b>     |                        |          |
| 10.0E-9                                | ✓                      | 117.97   |
| 100.0E-9                               | ✓                      | 98.79    |
| 1.0E-6                                 | ✓                      | 92.72    |
| 10.0E-6                                | ✓                      | 79.26    |
| <b>CAPERATIC ACID</b>                  |                        |          |
| 10.0E-9                                | ✓                      | 93.55    |
| 100.0E-9                               | ✓                      | 97.44    |
| 1.0E-6                                 | ✓                      | 63.13    |
| 10.0E-6                                | ✓                      | 114.44   |
| <b>CAPOBENIC ACID</b>                  |                        |          |
| 10.0E-9                                | ✓                      | 107.50   |
| 100.0E-9                               | ✓                      | 97.21    |
| 1.0E-6                                 | ✓                      | 121.37   |
| 10.0E-6                                | ✓                      | 117.02   |
| <b>CAPREOMYCIN SULFATE</b>             |                        |          |
| 10.0E-9                                | ✓                      | 110.75   |
| 100.0E-9                               | ✓                      | 125.26   |
| 1.0E-6                                 | ✓                      | 116.49   |
| 10.0E-6                                | ✓                      | 103.45   |
| <b>CAPSAICIN</b>                       |                        |          |
| 10.0E-9                                | ✓                      | 110.63   |
| 100.0E-9                               | ✓                      | 97.54    |
| 1.0E-6                                 | ✓                      | 98.36    |
| 10.0E-6                                | ✓                      | 89.49    |
| <b>CAPSANTHIN</b>                      |                        |          |
| 10.0E-9                                | ✓                      | 88.97    |
| 100.0E-9                               | ✓                      | 109.64   |
| 1.0E-6                                 | ✓                      | 124.33   |
| 10.0E-6                                | ✓                      | 86.58    |
| <b>CAPTOPRIL</b>                       |                        |          |
| 10.0E-9                                | ✓                      | 90.11    |
| 100.0E-9                               | ✓                      | 122.37   |
| 1.0E-6                                 | ✓                      | 88.17    |
| 10.0E-6                                | ✓                      | 110.35   |
| <b>CARAPIN</b>                         |                        |          |
| 10.0E-9                                | ✓                      | 95.79    |
| 100.0E-9                               | ✓                      | 92.58    |
| 1.0E-6                                 | ✓                      | 92.93    |
| 10.0E-6                                | ✓                      | 118.14   |
| <b>CARAPIN-8(9)-ENE</b>                |                        |          |
| 10.0E-9                                | ✓                      | 99.64    |
| 100.0E-9                               | ✓                      | 84.11    |
| 1.0E-6                                 | ✓                      | 104.59   |
| 10.0E-6                                | ✓                      | 90.43    |

| Compounds and Final Concentrations (M) | Average of % Viability | Hits (✓) |
|----------------------------------------|------------------------|----------|
| <b>CARBACHOL</b>                       |                        |          |
| 10.0E-9                                |                        | 69.55    |
| 100.0E-9                               |                        | 104.30   |
| 1.0E-6                                 |                        | 104.62   |
| 10.0E-6                                |                        | 105.61   |
| <b>CARBADOX</b>                        |                        |          |
| 10.0E-9                                |                        | 88.95    |
| 100.0E-9                               |                        | 149.44   |
| 1.0E-6                                 |                        | 102.25   |
| 10.0E-6                                |                        | 99.44    |
| <b>CARBAMAZEPINE</b>                   |                        |          |
| 10.0E-9                                |                        | 100.04   |
| 100.0E-9                               |                        | 127.11   |
| 1.0E-6                                 |                        | 86.62    |
| 10.0E-6                                |                        | 109.70   |
| <b>CARBENICILLIN DISODIUM</b>          |                        |          |
| 10.0E-9                                |                        | 96.71    |
| 100.0E-9                               |                        | 95.99    |
| 1.0E-6                                 |                        | 79.28    |
| 10.0E-6                                |                        | 106.58   |
| <b>CARBENOXOLONE SODIUM</b>            |                        |          |
| 10.0E-9                                |                        | 101.47   |
| 100.0E-9                               |                        | 96.65    |
| 1.0E-6                                 |                        | 61.68    |
| 10.0E-6                                |                        | 122.07   |
| <b>CARBIDOPA</b>                       |                        |          |
| 10.0E-9                                |                        | 105.83   |
| 100.0E-9                               |                        | 95.33    |
| 1.0E-6                                 |                        | 94.66    |
| 10.0E-6                                |                        | 67.18    |
| <b>CARBIMAZOLE</b>                     |                        |          |
| 10.0E-9                                |                        | 124.02   |
| 100.0E-9                               |                        | 109.86   |
| 1.0E-6                                 |                        | 116.51   |
| 10.0E-6                                |                        | 118.52   |
| <b>CARBINOXAMINE MALEATE</b>           |                        |          |
| 10.0E-9                                |                        | 100.81   |
| 100.0E-9                               |                        | 86.26    |
| 1.0E-6                                 |                        | 100.88   |
| 10.0E-6                                |                        | 134.44   |
| <b>CARBOPLATIN</b>                     |                        |          |
| 10.0E-9                                |                        | 87.93    |
| 100.0E-9                               |                        | 63.37    |
| 1.0E-6                                 |                        | 81.61    |
| 10.0E-6                                |                        | 73.00    |
| <b>CARISOPRODOL</b>                    |                        |          |
| 10.0E-9                                |                        | 92.19    |
| 100.0E-9                               |                        | 96.16    |
| 1.0E-6                                 |                        | 84.75    |
| 10.0E-6                                |                        | 91.11    |
| <b>CARMINIC ACID</b>                   |                        |          |
| 10.0E-9                                |                        | 77.54    |
| 100.0E-9                               |                        | 72.71    |
| 1.0E-6                                 |                        | 111.53   |
| 10.0E-6                                |                        | 107.55   |
| <b>CARMOFUR</b>                        |                        |          |
| 10.0E-9                                |                        | 109.79   |
| 100.0E-9                               |                        | 81.40    |
| 1.0E-6                                 |                        | 111.35   |
| 10.0E-6                                |                        | 77.42    |
| <b>CARMUSTINE</b>                      |                        |          |
| 10.0E-9                                |                        | 101.78   |
| 100.0E-9                               |                        | 114.08   |
| 1.0E-6                                 |                        | 83.81    |
| 10.0E-6                                |                        | 87.03    |
| <b>CARNITINE (dl) HYDROCHLORIDE</b>    |                        |          |
| 10.0E-9                                |                        | 103.61   |
| 100.0E-9                               |                        | 91.82    |
| 1.0E-6                                 |                        | 79.71    |
| 10.0E-6                                |                        | 80.42    |
| <b>CARNOSIC ACID</b>                   |                        |          |
| 10.0E-9                                |                        | 89.01    |
| 100.0E-9                               |                        | 138.02   |
| 1.0E-6                                 |                        | 68.29    |
| 10.0E-6                                |                        | 109.72   |
| <b>CARNOSINE</b>                       |                        |          |
| 10.0E-9                                |                        | 116.14   |
| 100.0E-9                               |                        | 89.17    |
| 1.0E-6                                 |                        | 110.62   |
| 10.0E-6                                |                        | 109.18   |
| <b>CARPROFEN</b>                       |                        |          |
| 10.0E-9                                |                        | 107.67   |
| 100.0E-9                               |                        | 120.56   |
| 1.0E-6                                 |                        | 96.75    |
| 10.0E-6                                |                        | 95.30    |

| Compounds and Final Concentrations (M) | Average of % Viability | Hits (✓) |
|----------------------------------------|------------------------|----------|
| <b>CARSALAM</b>                        |                        |          |
| 10.0E-9                                |                        | 77.82    |
| 100.0E-9                               |                        | 113.94   |
| 1.0E-6                                 |                        | 100.77   |
| 10.0E-6                                |                        | 116.02   |
| <b>CARVEDIOL</b>                       |                        |          |
| 10.0E-9                                |                        | 106.35   |
| 100.0E-9                               |                        | 104.67   |
| 1.0E-6                                 |                        | 127.63   |
| 10.0E-6                                |                        | 105.75   |
| <b>CARYLOPHYLLENE OXIDE</b>            |                        |          |
| 10.0E-9                                |                        | 112.20   |
| 100.0E-9                               |                        | 113.59   |
| 1.0E-6                                 |                        | 132.68   |
| 10.0E-6                                |                        | 98.64    |
| <b>CARYOPHYLLENE [t(-)]</b>            |                        |          |
| 10.0E-9                                |                        | 98.69    |
| 100.0E-9                               |                        | 88.75    |
| 1.0E-6                                 |                        | 107.67   |
| 10.0E-6                                |                        | 104.77   |
| <b>CARZENIDE</b>                       |                        |          |
| 10.0E-9                                |                        | 103.75   |
| 100.0E-9                               |                        | 82.68    |
| 1.0E-6                                 |                        | 86.27    |
| 10.0E-6                                |                        | 86.34    |
| <b>CATECHIN PENTAACETATE</b>           |                        |          |
| 10.0E-9                                |                        | 118.07   |
| 100.0E-9                               |                        | 94.55    |
| 1.0E-6                                 |                        | 109.74   |
| 10.0E-6                                |                        | 92.36    |
| <b>CATECHIN TETRAMETHYLETHER</b>       |                        |          |
| 10.0E-9                                |                        | 89.93    |
| 100.0E-9                               |                        | 126.11   |
| 1.0E-6                                 |                        | 95.77    |
| 10.0E-6                                |                        | 66.39    |
| <b>CEDRELONE</b>                       |                        |          |
| 10.0E-9                                |                        | 98.69    |
| 100.0E-9                               |                        | 110.62   |
| 1.0E-6                                 |                        | 64.64    |
| 10.0E-6                                |                        | 79.38    |
| <b>CEDROL</b>                          |                        |          |
| 10.0E-9                                |                        | 108.37   |
| 100.0E-9                               |                        | 139.56   |
| 1.0E-6                                 |                        | 97.50    |
| 10.0E-6                                |                        | 113.67   |
| <b>CEDRYL ACETATE</b>                  |                        |          |
| 10.0E-9                                |                        | 91.03    |
| 100.0E-9                               |                        | 99.90    |
| 1.0E-6                                 |                        | 138.96   |
| 10.0E-6                                |                        | 83.04    |
| <b>CEFACLOR</b>                        |                        |          |
| 10.0E-9                                |                        | 134.58   |
| 100.0E-9                               |                        | 100.03   |
| 1.0E-6                                 |                        | 67.91    |
| 10.0E-6                                |                        | 95.12    |
| <b>CEFADROXIL</b>                      |                        |          |
| 10.0E-9                                |                        | 102.02   |
| 100.0E-9                               |                        | 92.97    |
| 1.0E-6                                 |                        | 93.55    |
| 10.0E-6                                |                        | 96.28    |
| <b>CEFAMANDOLE NAFATE</b>              |                        |          |
| 10.0E-9                                |                        | 100.75   |
| 100.0E-9                               |                        | 104.55   |
| 1.0E-6                                 |                        | 113.34   |
| 10.0E-6                                |                        | 173.69   |
| <b>CEFAMANDOLE SODIUM</b>              |                        |          |
| 10.0E-9                                |                        | 120.15   |
| 100.0E-9                               |                        | 147.63   |
| 1.0E-6                                 |                        | 75.55    |
| 10.0E-6                                |                        | 100.36   |
| <b>CEFAZOLIN SODIUM</b>                |                        |          |
| 10.0E-9                                |                        | 109.98   |
| 100.0E-9                               |                        | 89.89    |
| 1.0E-6                                 |                        | 107.68   |
| 10.0E-6                                |                        | 90.00    |
| <b>CEFDINIR</b>                        |                        |          |
| 10.0E-9                                |                        | 132.75   |
| 100.0E-9                               |                        | 135.33   |
| 1.0E-6                                 |                        | 106.47   |
| 10.0E-6                                |                        | 121.02   |
| <b>CEFDITORIN PIVOXIL</b>              |                        |          |
| 10.0E-9                                |                        | 88.76    |
| 100.0E-9                               |                        | 115.84   |
| 1.0E-6                                 |                        | 100.74   |
| 10.0E-6                                |                        | 129.92   |

| Compounds and Final Concentrations (M) | Average of % Viability | Hits (✓) |
|----------------------------------------|------------------------|----------|
| <b>CEFMETAZOLE SODIUM</b>              |                        |          |
| 10.0E-9                                |                        | 63.47    |
| 100.0E-9                               |                        | 125.19   |
| 1.0E-6                                 |                        | 66.88    |
| 10.0E-6                                |                        | 113.95   |
| <b>CEFONICID SODIUM</b>                |                        |          |
| 10.0E-9                                |                        | 120.45   |
| 100.0E-9                               |                        | 98.24    |
| 1.0E-6                                 |                        | 115.28   |
| 10.0E-6                                |                        | 136.06   |
| <b>CEFOPERAZONE SODIUM</b>             |                        |          |
| 10.0E-9                                |                        | 93.62    |
| 100.0E-9                               |                        | 89.10    |
| 1.0E-6                                 |                        | 99.69    |
| 10.0E-6                                |                        | 90.03    |
| <b>CEFOTAXIME SODIUM</b>               |                        |          |
| 10.0E-9                                |                        | 82.25    |
| 100.0E-9                               |                        | 106.87   |
| 1.0E-6                                 |                        | 87.02    |
| 10.0E-6                                |                        | 104.56   |
| <b>CEFOXITIN SODIUM</b>                |                        |          |
| 10.0E-9                                |                        | 120.36   |
| 100.0E-9                               |                        | 111.39   |
| 1.0E-6                                 |                        | 86.35    |
| 10.0E-6                                |                        | 100.38   |
| <b>CEFPODOXIME PROXETIL</b>            |                        |          |
| 10.0E-9                                |                        | 111.52   |
| 100.0E-9                               |                        | 82.67    |
| 1.0E-6                                 |                        | 136.62   |
| 10.0E-6                                |                        | 116.39   |
| <b>CEFPROZIL</b>                       |                        |          |
| 10.0E-9                                |                        | 111.19   |
| 100.0E-9                               |                        | 125.52   |
| 1.0E-6                                 |                        | 100.75   |
| 10.0E-6                                |                        | 98.32    |
| <b>CEFSULODIN SODIUM</b>               |                        |          |
| 10.0E-9                                |                        | 112.51   |
| 100.0E-9                               |                        | 120.73   |
| 1.0E-6                                 |                        | 92.28    |
| 10.0E-6                                |                        | 84.22    |
| <b>CEFTAZIDIME</b>                     |                        |          |
| 10.0E-9                                |                        | 136.02   |
| 100.0E-9                               |                        | 149.02   |
| 1.0E-6                                 |                        | 115.75   |
| 10.0E-6                                |                        | 95.56    |
| <b>CEFTIBUTEN</b>                      |                        |          |
| 10.0E-9                                |                        | 98.08    |
| 100.0E-9                               |                        | 108.44   |
| 1.0E-6                                 |                        | 103.74   |
| 10.0E-6                                |                        | 101.00   |
| <b>CEFTRIAXONE SODIUM TRIHYDRATE</b>   |                        |          |
| 10.0E-9                                |                        | 110.81   |
| 100.0E-9                               |                        | 112.18   |
| 1.0E-6                                 |                        | 94.66    |
| 10.0E-6                                |                        | 119.00   |
| <b>CEFUROXIME AXETIL</b>               |                        |          |
| 10.0E-9                                |                        | 111.35   |
| 100.0E-9                               |                        | 91.00    |
| 1.0E-6                                 |                        | 112.99   |
| 10.0E-6                                |                        | 119.05   |
| <b>CEFUROXIME SODIUM</b>               |                        |          |
| 10.0E-9                                |                        | 93.19    |
| 100.0E-9                               |                        | 133.15   |
| 1.0E-6                                 |                        | 80.48    |
| 10.0E-6                                |                        | 121.03   |
| <b>CELASTROL</b>                       |                        |          |
| 10.0E-9                                |                        | 140.58   |
| 100.0E-9                               |                        | 115.52   |
| 1.0E-6                                 |                        | 115.01   |
| 10.0E-6                                |                        | 2.90     |
| <b>CELECOXIB</b>                       |                        |          |
| 10.0E-9                                |                        | 134.80   |
| 100.0E-9                               |                        | 95.79    |
| 1.0E-6                                 |                        | 112.20   |
| 10.0E-6                                |                        | 119.36   |
| <b>CELLOBIOSE (D{+})</b>               |                        |          |
| 10.0E-9                                |                        | 127.72   |
| 100.0E-9                               |                        | 96.73    |
| 1.0E-6                                 |                        | 111.86   |
| 10.0E-6                                |                        | 114.47   |
| <b>CEPHALEXIN</b>                      |                        |          |
| 10.0E-9                                |                        | 94.95    |
| 100.0E-9                               |                        | 97.47    |
| 1.0E-6                                 |                        | 72.22    |
| 10.0E-6                                |                        | 110.64   |

| Compounds and Final Concentrations (M) | Average of % Viability | Hits (✓) |
|----------------------------------------|------------------------|----------|
| <b>CEPHALOSPORIN C SODIUM</b>          |                        |          |
| 10.0E-9                                |                        | 112.32   |
| 100.0E-9                               |                        | 124.51   |
| 1.0E-6                                 |                        | 119.84   |
| 10.0E-6                                |                        | 109.15   |
| <b>CEPHALOTHIN SODIUM</b>              |                        |          |
| 10.0E-9                                |                        | 82.47    |
| 100.0E-9                               |                        | 93.91    |
| 1.0E-6                                 |                        | 98.48    |
| 10.0E-6                                |                        | 113.79   |
| <b>CEPHAPIRIN SODIUM</b>               |                        |          |
| 10.0E-9                                |                        | 70.43    |
| 100.0E-9                               |                        | 117.17   |
| 1.0E-6                                 |                        | 98.08    |
| 10.0E-6                                |                        | 137.63   |
| <b>CEPHRADINE</b>                      |                        |          |
| 10.0E-9                                |                        | 93.63    |
| 100.0E-9                               |                        | 144.05   |
| 1.0E-6                                 |                        | 79.15    |
| 10.0E-6                                |                        | 116.93   |
| <b>CETIRIZINE HYDROCHLORIDE</b>        |                        |          |
| 10.0E-9                                |                        | 90.09    |
| 100.0E-9                               |                        | 108.37   |
| 1.0E-6                                 |                        | 105.82   |
| 10.0E-6                                |                        | 153.08   |
| <b>CETRIMONIUM BROMIDE</b>             |                        |          |
| 10.0E-9                                |                        | 96.33    |
| 100.0E-9                               |                        | 109.09   |
| 1.0E-6                                 |                        | 90.40    |
| 10.0E-6                                |                        | 58.48    |
| <b>CETYLPYRIDINIUM CHLORIDE</b>        |                        |          |
| 10.0E-9                                |                        | 91.08    |
| 100.0E-9                               |                        | 131.13   |
| 1.0E-6                                 |                        | 87.41    |
| 10.0E-6                                |                        | 48.72    |
| <b>CEVADINE</b>                        |                        |          |
| 10.0E-9                                |                        | 159.40   |
| 100.0E-9                               |                        | 102.00   |
| 1.0E-6                                 |                        | 134.07   |
| 10.0E-6                                |                        | 158.49   |
| <b>CHAULMOGRIC ACID</b>                |                        |          |
| 10.0E-9                                |                        | 127.62   |
| 100.0E-9                               |                        | 142.97   |
| 1.0E-6                                 |                        | 110.13   |
| 10.0E-6                                |                        | 138.38   |
| <b>CHAULMOSULFONE</b>                  |                        |          |
| 10.0E-9                                |                        | 86.20    |
| 100.0E-9                               |                        | 79.75    |
| 1.0E-6                                 |                        | 97.27    |
| 10.0E-6                                |                        | 91.10    |
| <b>CHENODIOL</b>                       |                        |          |
| 10.0E-9                                |                        | 98.63    |
| 100.0E-9                               |                        | 125.39   |
| 1.0E-6                                 |                        | 83.03    |
| 10.0E-6                                |                        | 110.74   |
| <b>CHICAGO SKY BLUE</b>                |                        |          |
| 10.0E-9                                |                        | 94.48    |
| 100.0E-9                               |                        | 132.24   |
| 1.0E-6                                 |                        | 169.32   |
| 10.0E-6                                |                        | 76.58    |
| <b>CHINIOFON</b>                       |                        |          |
| 10.0E-9                                |                        | 78.85    |
| 100.0E-9                               |                        | 100.86   |
| 1.0E-6                                 |                        | 119.38   |
| 10.0E-6                                |                        | 71.67    |
| <b>CHLORALOSE</b>                      |                        |          |
| 10.0E-9                                |                        | 89.82    |
| 100.0E-9                               |                        | 91.14    |
| 1.0E-6                                 |                        | 108.41   |
| 10.0E-6                                |                        | 93.35    |
| <b>CHLORAMBUCIL</b>                    |                        |          |
| 10.0E-9                                |                        | 75.07    |
| 100.0E-9                               |                        | 66.17    |
| 1.0E-6                                 |                        | 105.15   |
| 10.0E-6                                |                        | 99.34    |
| <b>CHLORAMPHENICOL</b>                 |                        |          |
| 10.0E-9                                |                        | 91.21    |
| 100.0E-9                               |                        | 125.57   |
| 1.0E-6                                 |                        | 93.55    |
| 10.0E-6                                |                        | 92.11    |
| <b>CHLORAMPHENICOL HEMISUCCINATE</b>   |                        |          |
| 10.0E-9                                |                        | 85.24    |
| 100.0E-9                               |                        | 98.19    |
| 1.0E-6                                 |                        | 87.55    |
| 10.0E-6                                |                        | 102.48   |



| Compounds and Final Concentrations (M)   | Average of % Viability | Hits (✓) |
|------------------------------------------|------------------------|----------|
| <b>CHLORAMPHENICOL PALMITATE</b>         |                        |          |
| 10.0E-9                                  |                        | 103.57   |
| 100.0E-9                                 |                        | 108.58   |
| 1.0E-6                                   |                        | 86.48    |
| 10.0E-6                                  |                        | 105.58   |
| <b>CHLORANIL</b>                         |                        |          |
| 10.0E-9                                  |                        | 114.04   |
| 100.0E-9                                 |                        | 115.28   |
| 1.0E-6                                   |                        | 131.80   |
| 10.0E-6                                  |                        | 114.41   |
| <b>CHLORCYCLIZINE HYDROCHLORIDE</b>      |                        |          |
| 10.0E-9                                  |                        | 67.34    |
| 100.0E-9                                 |                        | 75.97    |
| 1.0E-6                                   |                        | 101.28   |
| 10.0E-6                                  |                        | 104.46   |
| <b>CHLORHEXIDINE</b>                     |                        |          |
| 10.0E-9                                  |                        | 117.83   |
| 100.0E-9                                 |                        | 105.38   |
| 1.0E-6                                   |                        | 134.62   |
| 10.0E-6                                  |                        | 87.99    |
| <b>CHLORINDIONE</b>                      |                        |          |
| 10.0E-9                                  |                        | 83.46    |
| 100.0E-9                                 |                        | 113.35   |
| 1.0E-6                                   |                        | 123.57   |
| 10.0E-6                                  |                        | 74.96    |
| <b>CHLORMADINONE ACETATE</b>             |                        |          |
| 10.0E-9                                  |                        | 109.70   |
| 100.0E-9                                 |                        | 93.59    |
| 1.0E-6                                   |                        | 91.48    |
| 10.0E-6                                  |                        | 98.58    |
| <b>CHLORMEZANONE</b>                     |                        |          |
| 10.0E-9                                  |                        | 108.24   |
| 100.0E-9                                 |                        | 80.09    |
| 1.0E-6                                   |                        | 102.32   |
| 10.0E-6                                  |                        | 101.11   |
| <b>CHLOROACETOXYQUINOLINE</b>            |                        |          |
| 10.0E-9                                  |                        | 145.85   |
| 100.0E-9                                 |                        | 75.87    |
| 1.0E-6                                   |                        | 88.59    |
| 10.0E-6                                  |                        | 73.04    |
| <b>CHLOROCRESOL</b>                      |                        |          |
| 10.0E-9                                  |                        | 156.70   |
| 100.0E-9                                 |                        | 93.00    |
| 1.0E-6                                   |                        | 97.02    |
| 10.0E-6                                  |                        | 95.26    |
| <b>CHLOROGUANIDE HYDROCHLORIDE</b>       |                        |          |
| 10.0E-9                                  |                        | 143.32   |
| 100.0E-9                                 |                        | 119.13   |
| 1.0E-6                                   |                        | 77.02    |
| 10.0E-6                                  |                        | 114.86   |
| <b>CHLOROPHYLLIDE Cu COMPLEX Na SALT</b> |                        |          |
| 10.0E-9                                  |                        | 80.32    |
| 100.0E-9                                 |                        | 85.66    |
| 1.0E-6                                   |                        | 96.68    |
| 10.0E-6                                  |                        | 87.91    |
| <b>CHLOROPYRAMINE HYDROCHLORIDE</b>      |                        |          |
| 10.0E-9                                  |                        | 99.97    |
| 100.0E-9                                 |                        | 122.74   |
| 1.0E-6                                   |                        | 134.89   |
| 10.0E-6                                  |                        | 83.99    |
| <b>CHLOROQUINE DIPHOSPHATE</b>           |                        |          |
| 10.0E-9                                  |                        | 46.02    |
| 100.0E-9                                 |                        | 103.13   |
| 1.0E-6                                   |                        | 121.02   |
| 10.0E-6                                  |                        | 87.99    |
| <b>CHLOROTHIAZIDE</b>                    |                        |          |
| 10.0E-9                                  |                        | 108.65   |
| 100.0E-9                                 |                        | 82.61    |
| 1.0E-6                                   |                        | 96.35    |
| 10.0E-6                                  |                        | 87.96    |
| <b>CHLOROXINE</b>                        |                        |          |
| 10.0E-9                                  |                        | 89.52    |
| 100.0E-9                                 |                        | 112.89   |
| 1.0E-6                                   |                        | 104.35   |
| 10.0E-6                                  |                        | 98.03    |
| <b>CHLOROXYLENOL</b>                     |                        |          |
| 10.0E-9                                  |                        | 110.83   |
| 100.0E-9                                 |                        | 90.85    |
| 1.0E-6                                   |                        | 77.21    |
| 10.0E-6                                  |                        | 93.32    |
| <b>CHLORPHENIRAMINE (S) MALEATE</b>      |                        |          |
| 10.0E-9                                  |                        | 62.73    |
| 100.0E-9                                 |                        | 99.81    |
| 1.0E-6                                   |                        | 106.27   |
| 10.0E-6                                  |                        | 116.29   |

| Compounds and Final Concentrations (M) | Average of % Viability | Hits (✓) |
|----------------------------------------|------------------------|----------|
| <b>CHLORPROMAZINE</b>                  |                        |          |
| 10.0E-9                                |                        | 122.03   |
| 100.0E-9                               |                        | 104.72   |
| 1.0E-6                                 |                        | 94.19    |
| 10.0E-6                                |                        | 145.78   |
| <b>CHLORPROPAMIDE</b>                  |                        |          |
| 10.0E-9                                |                        | 136.51   |
| 100.0E-9                               |                        | 95.81    |
| 1.0E-6                                 |                        | 106.16   |
| 10.0E-6                                |                        | 95.83    |
| <b>CHLORPROTHIXENE HYDROCHLORIDE</b>   |                        |          |
| 10.0E-9                                |                        | 96.82    |
| 100.0E-9                               |                        | 107.09   |
| 1.0E-6                                 |                        | 106.38   |
| 10.0E-6                                |                        | 125.61   |
| <b>CHLORPYRIFOS</b>                    |                        |          |
| 10.0E-9                                |                        | 103.81   |
| 100.0E-9                               |                        | 119.74   |
| 1.0E-6                                 |                        | 135.65   |
| 10.0E-6                                |                        | 101.36   |
| <b>CHLORQUINALDOL</b>                  |                        |          |
| 10.0E-9                                |                        | 120.24   |
| 100.0E-9                               |                        | 151.78   |
| 1.0E-6                                 |                        | 111.73   |
| 10.0E-6                                |                        | 97.72    |
| <b>CHLORTETRACYCLINE HYDROCHLORIDE</b> |                        |          |
| 10.0E-9                                |                        | 117.53   |
| 100.0E-9                               |                        | 87.99    |
| 1.0E-6                                 |                        | 120.21   |
| 10.0E-6                                |                        | 120.42   |
| <b>CHLORTHALIDONE</b>                  |                        |          |
| 10.0E-9                                |                        | 84.40    |
| 100.0E-9                               |                        | 107.49   |
| 1.0E-6                                 |                        | 104.32   |
| 10.0E-6                                |                        | 127.00   |
| <b>CHLORZOXAZONE</b>                   |                        |          |
| 10.0E-9                                |                        | 71.50    |
| 100.0E-9                               |                        | 99.70    |
| 1.0E-6                                 |                        | 82.68    |
| 10.0E-6                                |                        | 93.12    |
| <b>CHOL-11-ENIC ACID</b>               |                        |          |
| 10.0E-9                                |                        | 84.28    |
| 100.0E-9                               |                        | 92.70    |
| 1.0E-6                                 |                        | 125.51   |
| 10.0E-6                                |                        | 84.51    |
| <b>CHOLECALCIFEROL</b>                 |                        |          |
| 10.0E-9                                |                        | 115.51   |
| 100.0E-9                               |                        | 114.65   |
| 1.0E-6                                 |                        | 82.79    |
| 10.0E-6                                |                        | 86.61    |
| <b>CHOLEST-4,6-DIEN-3-ONE</b>          |                        |          |
| 10.0E-9                                |                        | 76.41    |
| 100.0E-9                               |                        | 87.90    |
| 1.0E-6                                 |                        | 75.99    |
| 10.0E-6                                |                        | 76.58    |
| <b>CHOLEST-5-EN-3-ONE</b>              |                        |          |
| 10.0E-9                                |                        | 114.06   |
| 100.0E-9                               |                        | 104.92   |
| 1.0E-6                                 |                        | 120.68   |
| 10.0E-6                                |                        | 106.65   |
| <b>CHOLESTAN-3-ONE</b>                 |                        |          |
| 10.0E-9                                |                        | 116.94   |
| 100.0E-9                               |                        | 120.01   |
| 1.0E-6                                 |                        | 99.12    |
| 10.0E-6                                |                        | 88.52    |
| <b>CHOLESTANE</b>                      |                        |          |
| 10.0E-9                                |                        | 136.10   |
| 100.0E-9                               |                        | 83.32    |
| 1.0E-6                                 |                        | 94.52    |
| 10.0E-6                                |                        | 102.99   |
| <b>CHOLESTEROL</b>                     |                        |          |
| 10.0E-9                                |                        | 88.46    |
| 100.0E-9                               |                        | 105.54   |
| 1.0E-6                                 |                        | 133.57   |
| 10.0E-6                                |                        | 120.35   |
| <b>CHOLIC ACID</b>                     |                        |          |
| 10.0E-9                                |                        | 106.95   |
| 100.0E-9                               |                        | 113.64   |
| 1.0E-6                                 |                        | 108.09   |
| 10.0E-6                                |                        | 39.85    |
| <b>CHOLIC ACID, METHYL ESTER</b>       |                        |          |
| 10.0E-9                                |                        | 105.32   |
| 100.0E-9                               |                        | 99.60    |
| 1.0E-6                                 |                        | 106.43   |
| 10.0E-6                                |                        | 89.84    |

| Compounds and Final Concentrations (M) | Average of % Viability | Hits (✓) |
|----------------------------------------|------------------------|----------|
| <b>CHOLINE CHLORIDE</b>                |                        |          |
| 10.0E-9                                |                        | 72.53    |
| 100.0E-9                               |                        | 105.38   |
| 1.0E-6                                 |                        | 82.35    |
| 10.0E-6                                |                        | 113.88   |
| <b>CHROMOCARB</b>                      |                        |          |
| 10.0E-9                                |                        | 86.22    |
| 100.0E-9                               |                        | 93.73    |
| 1.0E-6                                 |                        | 108.16   |
| 10.0E-6                                |                        | 99.58    |
| <b>CHRYSANTHEMIC ACID</b>              |                        |          |
| 10.0E-9                                |                        | 80.67    |
| 100.0E-9                               |                        | 94.05    |
| 1.0E-6                                 |                        | 112.28   |
| 10.0E-6                                |                        | 117.19   |
| <b>CHRYSANTHEMIC ACID, ETHYL ESTER</b> |                        |          |
| 10.0E-9                                |                        | 95.88    |
| 100.0E-9                               |                        | 78.30    |
| 1.0E-6                                 |                        | 72.61    |
| 10.0E-6                                |                        | 101.73   |
| <b>CHRYSANTHEMYL ALCOHOL</b>           |                        |          |
| 10.0E-9                                |                        | 87.02    |
| 100.0E-9                               |                        | 92.58    |
| 1.0E-6                                 |                        | 74.59    |
| 10.0E-6                                |                        | 102.01   |
| <b>CHRYSAROBIN</b>                     |                        |          |
| 10.0E-9                                |                        | 113.13   |
| 100.0E-9                               |                        | 104.16   |
| 1.0E-6                                 |                        | 91.16    |
| 10.0E-6                                |                        | 83.45    |
| <b>CHRYSIN</b>                         |                        |          |
| 10.0E-9                                |                        | 127.63   |
| 100.0E-9                               |                        | 108.25   |
| 1.0E-6                                 |                        | 108.97   |
| 10.0E-6                                |                        | 87.70    |
| <b>CHRYSIN DIMETHYL ETHER</b>          |                        |          |
| 10.0E-9                                |                        | 106.36   |
| 100.0E-9                               |                        | 97.89    |
| 1.0E-6                                 |                        | 76.31    |
| 10.0E-6                                |                        | 90.48    |
| <b>CHRYSOPHANOL</b>                    |                        |          |
| 10.0E-9                                |                        | 108.32   |
| 100.0E-9                               |                        | 86.22    |
| 1.0E-6                                 |                        | 120.44   |
| 10.0E-6                                |                        | 104.76   |
| <b>CHUKRASIN METHYL ETHER</b>          |                        |          |
| 10.0E-9                                |                        | 77.42    |
| 100.0E-9                               |                        | 98.64    |
| 1.0E-6                                 |                        | 78.88    |
| 10.0E-6                                |                        | 86.18    |
| <b>CICLOPIROX OLAMINE</b>              |                        |          |
| 10.0E-9                                |                        | 92.54    |
| 100.0E-9                               |                        | 86.41    |
| 1.0E-6                                 |                        | 105.63   |
| 10.0E-6                                |                        | 70.60    |
| <b>CILOSTAZOL</b>                      |                        |          |
| 10.0E-9                                |                        | 80.43    |
| 100.0E-9                               |                        | 105.95   |
| 1.0E-6                                 |                        | 123.22   |
| 10.0E-6                                |                        | 125.09   |
| <b>CIMETIDINE</b>                      |                        |          |
| 10.0E-9                                |                        | 96.28    |
| 100.0E-9                               |                        | 127.04   |
| 1.0E-6                                 |                        | 88.32    |
| 10.0E-6                                |                        | 111.90   |
| <b>CINCHONIDINE</b>                    |                        |          |
| 10.0E-9                                |                        | 108.75   |
| 100.0E-9                               |                        | 110.88   |
| 1.0E-6                                 |                        | 85.58    |
| 10.0E-6                                |                        | 105.58   |
| <b>CINCHONINE</b>                      |                        |          |
| 10.0E-9                                |                        | 106.60   |
| 100.0E-9                               |                        | 110.13   |
| 1.0E-6                                 |                        | 94.14    |
| 10.0E-6                                |                        | 92.22    |
| <b>CINCHOPHEN</b>                      |                        |          |
| 10.0E-9                                |                        | 99.06    |
| 100.0E-9                               |                        | 96.87    |
| 1.0E-6                                 |                        | 93.25    |
| 10.0E-6                                |                        | 72.31    |
| <b>CINNARAZINE</b>                     |                        |          |
| 10.0E-9                                |                        | 91.40    |
| 100.0E-9                               |                        | 92.84    |
| 1.0E-6                                 |                        | 91.92    |
| 10.0E-6                                |                        | 105.94   |

| Compounds and Final Concentrations (M)     | Average of % Viability | Hits (✓) |
|--------------------------------------------|------------------------|----------|
| <b>CINOXACIN</b>                           |                        |          |
| 10.0E-9                                    |                        | 108.25   |
| 100.0E-9                                   |                        | 141.13   |
| 1.0E-6                                     |                        | 58.33    |
| 10.0E-6                                    |                        | 86.80    |
| <b>CIPROFLOXACIN</b>                       |                        |          |
| 10.0E-9                                    |                        | 88.65    |
| 100.0E-9                                   |                        | 95.51    |
| 1.0E-6                                     |                        | 119.52   |
| 10.0E-6                                    |                        | 115.12   |
| <b>CISPLATIN</b>                           |                        |          |
| 10.0E-9                                    |                        | 128.39   |
| 100.0E-9                                   |                        | 97.65    |
| 1.0E-6                                     |                        | 133.00   |
| 10.0E-6                                    |                        | 114.26   |
| <b>CITALOPRAM</b>                          |                        |          |
| 10.0E-9                                    |                        | 78.36    |
| 100.0E-9                                   |                        | 82.97    |
| 1.0E-6                                     |                        | 122.07   |
| 10.0E-6                                    |                        | 68.32    |
| <b>CITICOLINE</b>                          |                        |          |
| 10.0E-9                                    |                        | 117.66   |
| 100.0E-9                                   |                        | 103.77   |
| 1.0E-6                                     |                        | 110.70   |
| 10.0E-6                                    |                        | 84.43    |
| <b>CITIOLONE</b>                           |                        |          |
| 10.0E-9                                    |                        | 99.97    |
| 100.0E-9                                   |                        | 125.77   |
| 1.0E-6                                     |                        | 100.73   |
| 10.0E-6                                    |                        | 94.48    |
| <b>CITRININ</b>                            |                        |          |
| 10.0E-9                                    |                        | 92.79    |
| 100.0E-9                                   |                        | 103.18   |
| 1.0E-6                                     |                        | 138.82   |
| 10.0E-6                                    |                        | 114.43   |
| <b>CITROPTEN</b>                           |                        |          |
| 10.0E-9                                    |                        | 98.62    |
| 100.0E-9                                   |                        | 99.07    |
| 1.0E-6                                     |                        | 101.70   |
| 10.0E-6                                    |                        | 103.59   |
| <b>CITRULLINE</b>                          |                        |          |
| 10.0E-9                                    |                        | 104.82   |
| 100.0E-9                                   |                        | 121.88   |
| 1.0E-6                                     |                        | 114.59   |
| 10.0E-6                                    |                        | 90.69    |
| <b>CLARITHROMYCIN</b>                      |                        |          |
| 10.0E-9                                    |                        | 101.03   |
| 100.0E-9                                   |                        | 133.56   |
| 1.0E-6                                     |                        | 70.35    |
| 10.0E-6                                    |                        | 115.85   |
| <b>CLAVULANATE LITHIUM</b>                 |                        |          |
| 10.0E-9                                    |                        | 93.35    |
| 100.0E-9                                   |                        | 103.48   |
| 1.0E-6                                     |                        | 128.51   |
| 10.0E-6                                    |                        | 132.06   |
| <b>CLEMASTINE</b>                          |                        |          |
| 10.0E-9                                    |                        | 116.78   |
| 100.0E-9                                   |                        | 66.71    |
| 1.0E-6                                     |                        | 76.57    |
| 10.0E-6                                    |                        | 96.09    |
| <b>CLEMIZOLE HYDROCHLORIDE</b>             |                        |          |
| 10.0E-9                                    |                        | 81.52    |
| 100.0E-9                                   |                        | 84.59    |
| 1.0E-6                                     |                        | 88.43    |
| 10.0E-6                                    |                        | 65.74    |
| <b>CLENBUTEROL HYDROCHLORIDE</b>           |                        |          |
| 10.0E-9                                    |                        | 76.08    |
| 100.0E-9                                   |                        | 112.31   |
| 1.0E-6                                     |                        | 80.92    |
| 10.0E-6                                    |                        | 123.37   |
| <b>CLIDINIUM BROMIDE</b>                   |                        |          |
| 10.0E-9                                    |                        | 123.87   |
| 100.0E-9                                   |                        | 136.43   |
| 1.0E-6                                     |                        | 76.47    |
| 10.0E-6                                    |                        | 107.90   |
| <b>CLINDAMYCIN HYDROCHLORIDE</b>           |                        |          |
| 10.0E-9                                    |                        | 114.00   |
| 100.0E-9                                   |                        | 78.00    |
| 1.0E-6                                     |                        | 72.22    |
| 10.0E-6                                    |                        | 101.64   |
| <b>CLINDAMYCIN PALMITATE HYDROCHLORIDE</b> |                        |          |
| 10.0E-9                                    |                        | 140.39   |
| 100.0E-9                                   |                        | 110.61   |
| 1.0E-6                                     |                        | 81.43    |
| 10.0E-6                                    |                        | 153.62   |

| Compounds and Final Concentrations (M) | Average of % Viability | Hits (✓) |
|----------------------------------------|------------------------|----------|
| <b>CLOQUINOL</b>                       |                        |          |
| 10.0E-9                                |                        | 111.09   |
| 100.0E-9                               |                        | 69.58    |
| 1.0E-6                                 |                        | 103.15   |
| 10.0E-6                                |                        | 91.07    |
| <b>CLOBETASOL PROPIONATE</b>           |                        |          |
| 10.0E-9                                |                        | 81.65    |
| 100.0E-9                               |                        | 99.96    |
| 1.0E-6                                 |                        | 104.88   |
| 10.0E-6                                |                        | 86.29    |
| <b>CLOFAZIMINE</b>                     |                        |          |
| 10.0E-9                                |                        | 89.04    |
| 100.0E-9                               |                        | 66.63    |
| 1.0E-6                                 |                        | 83.13    |
| 10.0E-6                                |                        | 69.56    |
| <b>CLOFIBRATE</b>                      |                        |          |
| 10.0E-9                                |                        | 86.41    |
| 100.0E-9                               |                        | 121.18   |
| 1.0E-6                                 |                        | 104.00   |
| 10.0E-6                                |                        | 98.91    |
| <b>CLOFIBRIC ACID</b>                  |                        |          |
| 10.0E-9                                |                        | 110.99   |
| 100.0E-9                               |                        | 89.03    |
| 1.0E-6                                 |                        | 90.99    |
| 10.0E-6                                |                        | 70.30    |
| <b>CLOFOCTOL</b>                       |                        |          |
| 10.0E-9                                |                        | 75.13    |
| 100.0E-9                               |                        | 112.24   |
| 1.0E-6                                 |                        | 81.43    |
| 10.0E-6                                |                        | 80.99    |
| <b>CLOMIPHENE CITRATE</b>              |                        |          |
| 10.0E-9                                |                        | 75.24    |
| 100.0E-9                               |                        | 96.31    |
| 1.0E-6                                 |                        | 135.66   |
| 10.0E-6                                |                        | 89.12    |
| <b>CLOMIPRAMINE HYDROCHLORIDE</b>      |                        |          |
| 10.0E-9                                |                        | 86.12    |
| 100.0E-9                               |                        | 109.56   |
| 1.0E-6                                 |                        | 113.42   |
| 10.0E-6                                |                        | 88.03    |
| <b>CLOMIDINE HYDROCHLORIDE</b>         |                        |          |
| 10.0E-9                                |                        | 121.43   |
| 100.0E-9                               |                        | 167.32   |
| 1.0E-6                                 |                        | 99.16    |
| 10.0E-6                                |                        | 143.00   |
| <b>CLOPERASTINE HYDROCHLORIDE</b>      |                        |          |
| 10.0E-9                                |                        | 103.69   |
| 100.0E-9                               |                        | 111.29   |
| 1.0E-6                                 |                        | 113.53   |
| 10.0E-6                                |                        | 60.44    |
| <b>CLOPIDOGREL SULFATE</b>             |                        |          |
| 10.0E-9                                |                        | 108.31   |
| 100.0E-9                               |                        | 126.45   |
| 1.0E-6                                 |                        | 109.55   |
| 10.0E-6                                |                        | 114.65   |
| <b>CLOPIDOL</b>                        |                        |          |
| 10.0E-9                                |                        | 83.21    |
| 100.0E-9                               |                        | 96.83    |
| 1.0E-6                                 |                        | 109.99   |
| 10.0E-6                                |                        | 99.43    |
| <b>CLORGILINE HYDROCHLORIDE</b>        |                        |          |
| 10.0E-9                                |                        | 85.27    |
| 100.0E-9                               |                        | 97.65    |
| 1.0E-6                                 |                        | 115.13   |
| 10.0E-6                                |                        | 88.20    |
| <b>CLORSULON</b>                       |                        |          |
| 10.0E-9                                |                        | 96.82    |
| 100.0E-9                               |                        | 93.24    |
| 1.0E-6                                 |                        | 126.83   |
| 10.0E-6                                |                        | 74.85    |
| <b>CLOTRIMAZOLE</b>                    |                        |          |
| 10.0E-9                                |                        | 98.04    |
| 100.0E-9                               |                        | 139.93   |
| 1.0E-6                                 |                        | 74.47    |
| 10.0E-6                                |                        | 104.80   |
| <b>CLOVANEDIOL DIACETATE</b>           |                        |          |
| 10.0E-9                                |                        | 110.37   |
| 100.0E-9                               |                        | 91.14    |
| 1.0E-6                                 |                        | 104.57   |
| 10.0E-6                                |                        | 101.27   |
| <b>CLOXACILLIN SODIUM</b>              |                        |          |
| 10.0E-9                                |                        | 67.95    |
| 100.0E-9                               |                        | 98.84    |
| 1.0E-6                                 |                        | 73.24    |
| 10.0E-6                                |                        | 85.96    |

| Compounds and Final Concentrations (M)                            | Average of % Viability | Hits (✓) |
|-------------------------------------------------------------------|------------------------|----------|
| <b>CLOXYQUIN</b>                                                  |                        |          |
| 10.0E-9                                                           |                        | 108.29   |
| 100.0E-9                                                          |                        | 107.38   |
| 1.0E-6                                                            |                        | 101.28   |
| 10.0E-6                                                           |                        | 103.00   |
| <b>CLOZAPINE</b>                                                  |                        |          |
| 10.0E-9                                                           |                        | 91.20    |
| 100.0E-9                                                          |                        | 145.11   |
| 1.0E-6                                                            |                        | 110.76   |
| 10.0E-6                                                           |                        | 113.00   |
| <b>COENZYME B12</b>                                               |                        |          |
| 10.0E-9                                                           |                        | 145.15   |
| 100.0E-9                                                          |                        | 181.83   |
| 1.0E-6                                                            |                        | 104.84   |
| 10.0E-6                                                           |                        | 73.64    |
| <b>COLCHICINE</b>                                                 |                        |          |
| 10.0E-9                                                           |                        | 86.27    |
| 100.0E-9                                                          |                        | 74.59    |
| 1.0E-6                                                            |                        | 67.32    |
| 10.0E-6                                                           |                        | 65.89    |
| <b>COLESEVALAM HYDROCHLORIDE (high mol wt copolymer @10mg/ml)</b> |                        |          |
| 10.0E-9                                                           |                        | 114.70   |
| 100.0E-9                                                          |                        | 109.12   |
| 1.0E-6                                                            |                        | 89.70    |
| 10.0E-6                                                           |                        | 100.91   |
| <b>COLFORSIN</b>                                                  |                        |          |
| 10.0E-9                                                           |                        | 93.72    |
| 100.0E-9                                                          |                        | 105.46   |
| 1.0E-6                                                            |                        | 115.20   |
| 10.0E-6                                                           |                        | 131.62   |
| <b>COLISTIMETHATE SODIUM</b>                                      |                        |          |
| 10.0E-9                                                           |                        | 109.38   |
| 100.0E-9                                                          |                        | 126.09   |
| 1.0E-6                                                            |                        | 118.25   |
| 10.0E-6                                                           |                        | 168.95   |
| <b>COLISTIN SULFATE</b>                                           |                        |          |
| 10.0E-9                                                           |                        | 124.07   |
| 100.0E-9                                                          |                        | 117.22   |
| 1.0E-6                                                            |                        | 87.50    |
| 10.0E-6                                                           |                        | 105.81   |
| <b>CONESSINE</b>                                                  |                        |          |
| 10.0E-9                                                           |                        | 81.03    |
| 100.0E-9                                                          |                        | 85.92    |
| 1.0E-6                                                            |                        | 69.30    |
| 10.0E-6                                                           |                        | 76.62    |
| <b>CONVALLATOXIN</b>                                              |                        |          |
| 10.0E-9                                                           |                        | 77.16    |
| 100.0E-9                                                          |                        | 81.52    |
| 1.0E-6                                                            |                        | 91.41    |
| 10.0E-6                                                           |                        | 98.63    |
| <b>CORALYNE CHLORIDE</b>                                          |                        |          |
| 10.0E-9                                                           |                        | 82.53    |
| 100.0E-9                                                          |                        | 84.40    |
| 1.0E-6                                                            |                        | 92.66    |
| 10.0E-6                                                           |                        | 108.36   |
| <b>CORTISONE</b>                                                  |                        |          |
| 10.0E-9                                                           |                        | 152.65   |
| 100.0E-9                                                          |                        | 123.43   |
| 1.0E-6                                                            |                        | 97.78    |
| 10.0E-6                                                           |                        | 109.69   |
| <b>CORTISONE ACETATE</b>                                          |                        |          |
| 10.0E-9                                                           |                        | 75.10    |
| 100.0E-9                                                          |                        | 100.68   |
| 1.0E-6                                                            |                        | 71.19    |
| 10.0E-6                                                           |                        | 92.22    |
| <b>CORYNANTHINE</b>                                               |                        |          |
| 10.0E-9                                                           |                        | 109.56   |
| 100.0E-9                                                          |                        | 98.41    |
| 1.0E-6                                                            |                        | 101.01   |
| 10.0E-6                                                           |                        | 118.93   |
| <b>COTARNINE CHLORIDE</b>                                         |                        |          |
| 10.0E-9                                                           |                        | 111.09   |
| 100.0E-9                                                          |                        | 126.57   |
| 1.0E-6                                                            |                        | 83.13    |
| 10.0E-6                                                           |                        | 94.19    |
| <b>COTININE</b>                                                   |                        |          |
| 10.0E-9                                                           |                        | 90.43    |
| 100.0E-9                                                          |                        | 113.64   |
| 1.0E-6                                                            |                        | 89.87    |
| 10.0E-6                                                           |                        | 119.19   |
| <b>COUMARIN</b>                                                   |                        |          |
| 10.0E-9                                                           |                        | 95.07    |
| 100.0E-9                                                          |                        | 122.71   |
| 1.0E-6                                                            |                        | 104.22   |
| 10.0E-6                                                           |                        | 99.29    |

| Compounds and Final Concentrations (M) | Average of % Viability | Hits (✓) |
|----------------------------------------|------------------------|----------|
| <b>CREATININE</b>                      |                        | ✓        |
| 10.0E-9                                |                        | 83.25    |
| 100.0E-9                               |                        | 107.25   |
| 1.0E-6                                 |                        | 114.14   |
| 10.0E-6                                |                        | 119.77   |
| <b>CRESOL</b>                          |                        |          |
| 10.0E-9                                |                        | 74.11    |
| 100.0E-9                               |                        | 129.24   |
| 1.0E-6                                 |                        | 80.44    |
| 10.0E-6                                |                        | 80.28    |
| <b>CRESOPIRINE</b>                     |                        |          |
| 10.0E-9                                |                        | 132.32   |
| 100.0E-9                               |                        | 121.61   |
| 1.0E-6                                 |                        | 99.42    |
| 10.0E-6                                |                        | 93.84    |
| <b>CROMOLYN SODIUM</b>                 |                        |          |
| 10.0E-9                                |                        | 113.61   |
| 100.0E-9                               |                        | 160.73   |
| 1.0E-6                                 |                        | 118.40   |
| 10.0E-6                                |                        | 126.81   |
| <b>CROTAMITON</b>                      |                        | ✓        |
| 10.0E-9                                |                        | 135.62   |
| 100.0E-9                               |                        | 100.44   |
| 1.0E-6                                 |                        | 97.55    |
| 10.0E-6                                |                        | 65.24    |
| <b>CRUSTECDYSONE</b>                   |                        |          |
| 10.0E-9                                |                        | 99.03    |
| 100.0E-9                               |                        | 109.80   |
| 1.0E-6                                 |                        | 168.52   |
| 10.0E-6                                |                        | 112.13   |
| <b>CRYPTOTANSHINONE</b>                |                        |          |
| 10.0E-9                                |                        | 84.19    |
| 100.0E-9                               |                        | 111.19   |
| 1.0E-6                                 |                        | 67.36    |
| 10.0E-6                                |                        | 107.43   |
| <b>CURCUMIN</b>                        |                        |          |
| 10.0E-9                                |                        | 91.43    |
| 100.0E-9                               |                        | 97.69    |
| 1.0E-6                                 |                        | 112.97   |
| 10.0E-6                                |                        | 84.56    |
| <b>CYCLANDELATE</b>                    |                        |          |
| 10.0E-9                                |                        | 110.10   |
| 100.0E-9                               |                        | 157.49   |
| 1.0E-6                                 |                        | 122.13   |
| 10.0E-6                                |                        | 113.90   |
| <b>CYCLIZINE</b>                       |                        |          |
| 10.0E-9                                |                        | 103.71   |
| 100.0E-9                               |                        | 136.21   |
| 1.0E-6                                 |                        | 118.89   |
| 10.0E-6                                |                        | 121.84   |
| <b>CYCLOBENZAPRINE HYDROCHLORIDE</b>   |                        |          |
| 10.0E-9                                |                        | 84.39    |
| 100.0E-9                               |                        | 112.38   |
| 1.0E-6                                 |                        | 101.78   |
| 10.0E-6                                |                        | 81.09    |
| <b>CYCLOCREATINE</b>                   |                        |          |
| 10.0E-9                                |                        | 118.44   |
| 100.0E-9                               |                        | 122.82   |
| 1.0E-6                                 |                        | 123.40   |
| 10.0E-6                                |                        | 113.47   |
| <b>CYCLOHEXIMIDE</b>                   |                        | ✓        |
| 10.0E-9                                |                        | 117.12   |
| 100.0E-9                               |                        | 137.62   |
| 1.0E-6                                 |                        | 110.96   |
| 10.0E-6                                |                        | 34.14    |
| <b>CYCLOLEUCINE</b>                    |                        |          |
| 10.0E-9                                |                        | 143.00   |
| 100.0E-9                               |                        | 121.73   |
| 1.0E-6                                 |                        | 130.19   |
| 10.0E-6                                |                        | 113.58   |
| <b>CYCLOPENTOLATE HYDROCHLORIDE</b>    |                        |          |
| 10.0E-9                                |                        | 94.05    |
| 100.0E-9                               |                        | 147.86   |
| 1.0E-6                                 |                        | 132.40   |
| 10.0E-6                                |                        | 142.81   |
| <b>CYCLOPHOSPHAMIDE HYDRATE</b>        |                        |          |
| 10.0E-9                                |                        | 107.83   |
| 100.0E-9                               |                        | 125.39   |
| 1.0E-6                                 |                        | 79.71    |
| 10.0E-6                                |                        | 117.58   |
| <b>CYCLOSERINE</b>                     |                        |          |
| 10.0E-9                                |                        | 128.55   |
| 100.0E-9                               |                        | 123.71   |
| 1.0E-6                                 |                        | 114.64   |
| 10.0E-6                                |                        | 109.97   |

| Compounds and Final Concentrations (M)    | Average of % Viability | Hits (✓) |
|-------------------------------------------|------------------------|----------|
| <b>CYCLOSPORINE</b>                       |                        | ✓        |
| 10.0E-9                                   | 103.17                 |          |
| 100.0E-9                                  | 106.98                 |          |
| 1.0E-6                                    | 74.91                  |          |
| 10.0E-6                                   | 55.35                  |          |
| <b>CYCLOTHIAZIDE</b>                      |                        |          |
| 10.0E-9                                   | 107.94                 |          |
| 100.0E-9                                  | 86.56                  |          |
| 1.0E-6                                    | 109.64                 |          |
| 10.0E-6                                   | 88.46                  |          |
| <b>CYCLOVERATRYLENE</b>                   |                        |          |
| 10.0E-9                                   | 149.64                 |          |
| 100.0E-9                                  | 103.12                 |          |
| 1.0E-6                                    | 122.04                 |          |
| 10.0E-6                                   | 115.23                 |          |
| <b>CYPERMETHRIN</b>                       |                        |          |
| 10.0E-9                                   | 81.59                  |          |
| 100.0E-9                                  | 90.94                  |          |
| 1.0E-6                                    | 98.33                  |          |
| 10.0E-6                                   | 145.31                 |          |
| <b>CYPROHEPTADINE HYDROCHLORIDE</b>       |                        |          |
| 10.0E-9                                   | 99.01                  |          |
| 100.0E-9                                  | 151.96                 |          |
| 1.0E-6                                    | 147.24                 |          |
| 10.0E-6                                   | 81.24                  |          |
| <b>CYPROTERONE ACETATE</b>                |                        |          |
| 10.0E-9                                   | 105.12                 |          |
| 100.0E-9                                  | 113.09                 |          |
| 1.0E-6                                    | 127.25                 |          |
| 10.0E-6                                   | 117.84                 |          |
| <b>CYSTEAMINE HYDROCHLORIDE</b>           |                        |          |
| 10.0E-9                                   | 106.83                 |          |
| 100.0E-9                                  | 113.26                 |          |
| 1.0E-6                                    | 99.77                  |          |
| 10.0E-6                                   | 85.73                  |          |
| <b>CYSTEINE HYDROCHLORIDE</b>             |                        |          |
| 10.0E-9                                   | 75.52                  |          |
| 100.0E-9                                  | 109.47                 |          |
| 1.0E-6                                    | 89.93                  |          |
| 10.0E-6                                   | 96.48                  |          |
| <b>CYSTINE</b>                            |                        |          |
| 10.0E-9                                   | 106.41                 |          |
| 100.0E-9                                  | 92.43                  |          |
| 1.0E-6                                    | 84.98                  |          |
| 10.0E-6                                   | 104.05                 |          |
| <b>CYTARABINE</b>                         |                        |          |
| 10.0E-9                                   | 84.72                  |          |
| 100.0E-9                                  | 82.63                  |          |
| 1.0E-6                                    | 71.19                  |          |
| 10.0E-6                                   | 62.54                  |          |
| <b>CYTIDINE</b>                           |                        |          |
| 10.0E-9                                   | 101.31                 |          |
| 100.0E-9                                  | 85.24                  |          |
| 1.0E-6                                    | 99.93                  |          |
| 10.0E-6                                   | 86.37                  |          |
| <b>CYTISINE</b>                           |                        |          |
| 10.0E-9                                   | 132.22                 |          |
| 100.0E-9                                  | 129.04                 |          |
| 1.0E-6                                    | 101.12                 |          |
| 10.0E-6                                   | 95.08                  |          |
| <b>d,l-threo-3-HYDROXYASPARTIC ACID</b>   |                        |          |
| 10.0E-9                                   | 143.12                 |          |
| 100.0E-9                                  | 86.09                  |          |
| 1.0E-6                                    | 123.82                 |          |
| 10.0E-6                                   | 119.26                 |          |
| <b>DACARBAZINE</b>                        |                        |          |
| 10.0E-9                                   | 106.00                 |          |
| 100.0E-9                                  | 109.43                 |          |
| 1.0E-6                                    | 112.86                 |          |
| 10.0E-6                                   | 125.32                 |          |
| <b>DACTINOMYCIN</b>                       |                        | ✓        |
| 10.0E-9                                   | 97.72                  |          |
| 100.0E-9                                  | 108.96                 |          |
| 1.0E-6                                    | 12.48                  |          |
| 10.0E-6                                   | 1.20                   |          |
| <b>DALBERGIONE</b>                        |                        |          |
| 10.0E-9                                   | 101.67                 |          |
| 100.0E-9                                  | 87.09                  |          |
| 1.0E-6                                    | 89.59                  |          |
| 10.0E-6                                   | 55.51                  |          |
| <b>DALBERGIONE, 4-METHOXY-4'-HYDROXY-</b> |                        |          |
| 10.0E-9                                   | 116.02                 |          |
| 100.0E-9                                  | 117.50                 |          |
| 1.0E-6                                    | 117.74                 |          |
| 10.0E-6                                   | 62.62                  |          |



| Compounds and Final Concentrations (M)   | Average of % Viability | Hits (✓) |
|------------------------------------------|------------------------|----------|
| <b>DANAZOL</b>                           |                        |          |
| 10.0E-9                                  |                        | 102.27   |
| 100.0E-9                                 |                        | 107.41   |
| 1.0E-6                                   |                        | 88.22    |
| 10.0E-6                                  |                        | 98.87    |
| <b>DANTHRON</b>                          |                        |          |
| 10.0E-9                                  |                        | 134.17   |
| 100.0E-9                                 |                        | 122.27   |
| 1.0E-6                                   |                        | 108.62   |
| 10.0E-6                                  |                        | 100.40   |
| <b>DANTROLENE SODIUM</b>                 |                        |          |
| 10.0E-9                                  |                        | 130.13   |
| 100.0E-9                                 |                        | 159.69   |
| 1.0E-6                                   |                        | 79.85    |
| 10.0E-6                                  |                        | 76.36    |
| <b>DAPSONE</b>                           |                        |          |
| 10.0E-9                                  |                        | 70.45    |
| 100.0E-9                                 |                        | 93.45    |
| 1.0E-6                                   |                        | 70.12    |
| 10.0E-6                                  |                        | 92.61    |
| <b>DAUNORUBICIN</b>                      |                        |          |
| 10.0E-9                                  |                        | 89.33    |
| 100.0E-9                                 |                        | 105.36   |
| 1.0E-6                                   |                        | 41.21    |
| 10.0E-6                                  |                        | 4.53     |
| <b>DEACETOXY(7)-7-OXOKHIVORINIC ACID</b> |                        |          |
| 10.0E-9                                  |                        | 101.91   |
| 100.0E-9                                 |                        | 104.66   |
| 1.0E-6                                   |                        | 125.17   |
| 10.0E-6                                  |                        | 103.11   |
| <b>DEACETOXY-7-OXOGEDUNIN</b>            |                        |          |
| 10.0E-9                                  |                        | 113.05   |
| 100.0E-9                                 |                        | 94.69    |
| 1.0E-6                                   |                        | 78.83    |
| 10.0E-6                                  |                        | 129.79   |
| <b>DEACETYLGEDUNIN</b>                   |                        |          |
| 10.0E-9                                  |                        | 139.19   |
| 100.0E-9                                 |                        | 115.57   |
| 1.0E-6                                   |                        | 78.75    |
| 10.0E-6                                  |                        | 109.58   |
| <b>DEBRISOQUIN SULFATE</b>               |                        |          |
| 10.0E-9                                  |                        | 109.97   |
| 100.0E-9                                 |                        | 90.26    |
| 1.0E-6                                   |                        | 107.55   |
| 10.0E-6                                  |                        | 77.64    |
| <b>DECAHYDROGAMBOGIC ACID</b>            |                        |          |
| 10.0E-9                                  |                        | 68.78    |
| 100.0E-9                                 |                        | 93.62    |
| 1.0E-6                                   |                        | 89.53    |
| 10.0E-6                                  |                        | 74.43    |
| <b>DECAMETHONIUM BROMIDE</b>             |                        |          |
| 10.0E-9                                  |                        | 92.62    |
| 100.0E-9                                 |                        | 112.71   |
| 1.0E-6                                   |                        | 95.52    |
| 10.0E-6                                  |                        | 88.11    |
| <b>DECOQUINATE</b>                       |                        |          |
| 10.0E-9                                  |                        | 113.75   |
| 100.0E-9                                 |                        | 90.86    |
| 1.0E-6                                   |                        | 89.81    |
| 10.0E-6                                  |                        | 99.22    |
| <b>DEFERIPRONE</b>                       |                        |          |
| 10.0E-9                                  |                        | 114.67   |
| 100.0E-9                                 |                        | 110.80   |
| 1.0E-6                                   |                        | 124.96   |
| 10.0E-6                                  |                        | 87.12    |
| <b>DEFEROXAMINE MESYLATE</b>             |                        |          |
| 10.0E-9                                  |                        | 84.93    |
| 100.0E-9                                 |                        | 119.25   |
| 1.0E-6                                   |                        | 90.96    |
| 10.0E-6                                  |                        | 89.06    |
| <b>DEGUELIN(-)</b>                       |                        |          |
| 10.0E-9                                  |                        | 95.29    |
| 100.0E-9                                 |                        | 104.70   |
| 1.0E-6                                   |                        | 85.38    |
| 10.0E-6                                  |                        | 87.21    |
| <b>DEHYDROABIETAMIDE</b>                 |                        |          |
| 10.0E-9                                  |                        | 85.31    |
| 100.0E-9                                 |                        | 107.07   |
| 1.0E-6                                   |                        | 75.49    |
| 10.0E-6                                  |                        | 93.58    |
| <b>DEHYDROCHOLIC ACID</b>                |                        |          |
| 10.0E-9                                  |                        | 80.07    |
| 100.0E-9                                 |                        | 90.52    |
| 1.0E-6                                   |                        | 100.84   |
| 10.0E-6                                  |                        | 105.32   |

| Compounds and Final Concentrations (M)               | Average of % Viability | Hits (✓) |
|------------------------------------------------------|------------------------|----------|
| <b>DEHYDRIDIHYDROROTENONE</b>                        |                        |          |
| 10.0E-9                                              |                        | 96.74    |
| 100.0E-9                                             |                        | 100.32   |
| 1.0E-6                                               |                        | 127.45   |
| 10.0E-6                                              |                        | 106.04   |
| <b>DEHYDROROTENONE</b>                               |                        |          |
| 10.0E-9                                              |                        | 151.74   |
| 100.0E-9                                             |                        | 94.91    |
| 1.0E-6                                               |                        | 101.03   |
| 10.0E-6                                              |                        | 79.67    |
| <b>DEHYDROVARIABILIN</b>                             |                        |          |
| 10.0E-9                                              |                        | 97.24    |
| 100.0E-9                                             |                        | 149.80   |
| 1.0E-6                                               |                        | 133.64   |
| 10.0E-6                                              |                        | 119.21   |
| <b>DEMECLOCYCLINE HYDROCHLORIDE</b>                  |                        |          |
| 10.0E-9                                              |                        | 93.53    |
| 100.0E-9                                             |                        | 139.43   |
| 1.0E-6                                               |                        | 105.23   |
| 10.0E-6                                              |                        | 80.54    |
| <b>DEMETHYLNIBILETIN</b>                             |                        |          |
| 10.0E-9                                              |                        | 125.60   |
| 100.0E-9                                             |                        | 91.39    |
| 1.0E-6                                               |                        | 88.23    |
| 10.0E-6                                              |                        | 125.09   |
| <b>DENATONIUM BENZOATE</b>                           |                        |          |
| 10.0E-9                                              |                        | 130.43   |
| 100.0E-9                                             |                        | 102.96   |
| 1.0E-6                                               |                        | 86.37    |
| 10.0E-6                                              |                        | 85.70    |
| <b>DEOXYADENOSINE</b>                                |                        |          |
| 10.0E-9                                              |                        | 82.26    |
| 100.0E-9                                             |                        | 75.36    |
| 1.0E-6                                               |                        | 70.99    |
| 10.0E-6                                              |                        | 73.09    |
| <b>DEOXYCHOLIC ACID</b>                              |                        |          |
| 10.0E-9                                              |                        | 127.64   |
| 100.0E-9                                             |                        | 122.75   |
| 1.0E-6                                               |                        | 168.91   |
| 10.0E-6                                              |                        | 49.89    |
| <b>DEOXYGEDUNIN</b>                                  |                        |          |
| 10.0E-9                                              |                        | 94.97    |
| 100.0E-9                                             |                        | 102.44   |
| 1.0E-6                                               |                        | 87.69    |
| 10.0E-6                                              |                        | 99.86    |
| <b>DEOXYKHIVORIN</b>                                 |                        |          |
| 10.0E-9                                              |                        | 111.31   |
| 100.0E-9                                             |                        | 133.64   |
| 1.0E-6                                               |                        | 119.48   |
| 10.0E-6                                              |                        | 141.89   |
| <b>DEOXYSPAPPANONE B 7,3'-DIMETHYL ETHER</b>         |                        |          |
| 10.0E-9                                              |                        | 94.71    |
| 100.0E-9                                             |                        | 103.56   |
| 1.0E-6                                               |                        | 81.61    |
| 10.0E-6                                              |                        | 101.84   |
| <b>DEOXYSPAPPANONE B 7,3'-DIMETHYL ETHER ACETATE</b> |                        |          |
| 10.0E-9                                              |                        | 117.98   |
| 100.0E-9                                             |                        | 130.38   |
| 1.0E-6                                               |                        | 71.86    |
| 10.0E-6                                              |                        | 71.75    |
| <b>DEOXYSPAPPANONE B 7,4'-DIMETHYL ETHER</b>         |                        |          |
| 10.0E-9                                              |                        | 138.23   |
| 100.0E-9                                             |                        | 96.38    |
| 1.0E-6                                               |                        | 91.15    |
| 10.0E-6                                              |                        | 37.11    |
| <b>DEOXYSPAPPANONE B TRIMETHYL ETHER</b>             |                        |          |
| 10.0E-9                                              |                        | 119.73   |
| 100.0E-9                                             |                        | 116.25   |
| 1.0E-6                                               |                        | 113.19   |
| 10.0E-6                                              |                        | 118.66   |
| <b>DEQUALINIUM CHLORIDE</b>                          |                        |          |
| 10.0E-9                                              |                        | 120.45   |
| 100.0E-9                                             |                        | 113.68   |
| 1.0E-6                                               |                        | 93.33    |
| 10.0E-6                                              |                        | 68.69    |
| <b>DERACOXIB</b>                                     |                        |          |
| 10.0E-9                                              |                        | 132.23   |
| 100.0E-9                                             |                        | 107.95   |
| 1.0E-6                                               |                        | 114.31   |
| 10.0E-6                                              |                        | 113.58   |
| <b>DERRUSNIN</b>                                     |                        |          |
| 10.0E-9                                              |                        | 90.03    |
| 100.0E-9                                             |                        | 81.50    |
| 1.0E-6                                               |                        | 98.33    |
| 10.0E-6                                              |                        | 79.79    |

| Compounds and Final Concentrations (M)            | Average of % Viability | Hits (✓) |
|---------------------------------------------------|------------------------|----------|
| <b>DERRUSTONE</b>                                 |                        |          |
| 10.0E-9                                           |                        | 104.49   |
| 100.0E-9                                          |                        | 90.18    |
| 1.0E-6                                            |                        | 115.91   |
| 10.0E-6                                           |                        | 111.11   |
| <b>DESACETYL (7)KHIVORINIC ACID, METHYL ESTER</b> |                        |          |
| 10.0E-9                                           |                        | 107.28   |
| 100.0E-9                                          |                        | 116.64   |
| 1.0E-6                                            |                        | 123.82   |
| 10.0E-6                                           |                        | 109.99   |
| <b>DESACETYLCOLFORSIN</b>                         |                        |          |
| 10.0E-9                                           |                        | 131.11   |
| 100.0E-9                                          |                        | 128.74   |
| 1.0E-6                                            |                        | 84.84    |
| 10.0E-6                                           |                        | 110.89   |
| <b>DESIPRAMINE HYDROCHLORIDE</b>                  |                        |          |
| 10.0E-9                                           |                        | 129.64   |
| 100.0E-9                                          |                        | 151.05   |
| 1.0E-6                                            |                        | 114.24   |
| 10.0E-6                                           |                        | 149.13   |
| <b>DESONIDE</b>                                   |                        |          |
| 10.0E-9                                           |                        | 109.26   |
| 100.0E-9                                          |                        | 76.94    |
| 1.0E-6                                            |                        | 98.97    |
| 10.0E-6                                           |                        | 63.97    |
| <b>DESOXYCORTICOSTERONE ACETATE</b>               |                        |          |
| 10.0E-9                                           |                        | 141.57   |
| 100.0E-9                                          |                        | 107.01   |
| 1.0E-6                                            |                        | 94.08    |
| 10.0E-6                                           |                        | 110.71   |
| <b>DESOXYMETASON</b>                              |                        |          |
| 10.0E-9                                           |                        | 114.14   |
| 100.0E-9                                          |                        | 138.55   |
| 1.0E-6                                            |                        | 90.07    |
| 10.0E-6                                           |                        | 115.64   |
| <b>DESOXYPEGANINE HYDROCHLORIDE</b>               |                        |          |
| 10.0E-9                                           |                        | 117.58   |
| 100.0E-9                                          |                        | 97.66    |
| 1.0E-6                                            |                        | 107.21   |
| 10.0E-6                                           |                        | 103.05   |
| <b>DEXAMETHASONE</b>                              |                        |          |
| 10.0E-9                                           |                        | 122.98   |
| 100.0E-9                                          |                        | 76.64    |
| 1.0E-6                                            |                        | 80.49    |
| 10.0E-6                                           |                        | 90.03    |
| <b>DEXAMETHASONE ACETATE</b>                      |                        |          |
| 10.0E-9                                           |                        | 129.57   |
| 100.0E-9                                          |                        | 121.36   |
| 1.0E-6                                            |                        | 93.40    |
| 10.0E-6                                           |                        | 105.26   |
| <b>DEXAMETHASONE SODIUM PHOSPHATE</b>             |                        |          |
| 10.0E-9                                           |                        | 56.53    |
| 100.0E-9                                          |                        | 97.00    |
| 1.0E-6                                            |                        | 85.08    |
| 10.0E-6                                           |                        | 92.16    |
| <b>DEXCHLORPHENIRAMINE MALEATE</b>                |                        |          |
| 10.0E-9                                           |                        | 108.39   |
| 100.0E-9                                          |                        | 134.78   |
| 1.0E-6                                            |                        | 109.64   |
| 10.0E-6                                           |                        | 103.10   |
| <b>DEXLANSOPRAZOLE</b>                            |                        |          |
| 10.0E-9                                           |                        | 139.12   |
| 100.0E-9                                          |                        | 137.71   |
| 1.0E-6                                            |                        | 135.26   |
| 10.0E-6                                           |                        | 94.41    |
| <b>DEXPANTHENOL</b>                               |                        |          |
| 10.0E-9                                           |                        | 102.67   |
| 100.0E-9                                          |                        | 104.73   |
| 1.0E-6                                            |                        | 117.56   |
| 10.0E-6                                           |                        | 90.21    |
| <b>DEXPROPRANOLOL HYDROCHLORIDE</b>               |                        |          |
| 10.0E-9                                           |                        | 116.75   |
| 100.0E-9                                          |                        | 147.04   |
| 1.0E-6                                            |                        | 98.35    |
| 10.0E-6                                           |                        | 88.22    |
| <b>DEXTROMETHORPHAN HYDROBROMIDE</b>              |                        |          |
| 10.0E-9                                           |                        | 156.77   |
| 100.0E-9                                          |                        | 143.08   |
| 1.0E-6                                            |                        | 97.52    |
| 10.0E-6                                           |                        | 127.65   |
| <b>DIACERIN</b>                                   |                        |          |
| 10.0E-9                                           |                        | 103.66   |
| 100.0E-9                                          |                        | 117.97   |
| 1.0E-6                                            |                        | 87.46    |
| 10.0E-6                                           |                        | 95.31    |

| Compounds and Final Concentrations (M) | Average of % Viability | Hits (✓) |
|----------------------------------------|------------------------|----------|
| <b>DIACETAMATE</b>                     |                        |          |
| 10.0E-9                                |                        | 106.53   |
| 100.0E-9                               |                        | 111.83   |
| 1.0E-6                                 |                        | 103.40   |
| 10.0E-6                                |                        | 78.44    |
| <b>DIALLYL SULFIDE</b>                 |                        |          |
| 10.0E-9                                |                        | 108.34   |
| 100.0E-9                               |                        | 156.23   |
| 1.0E-6                                 |                        | 116.39   |
| 10.0E-6                                |                        | 124.01   |
| <b>DIALLYL TRISULFIDE</b>              |                        |          |
| 10.0E-9                                |                        | 85.20    |
| 100.0E-9                               |                        | 105.56   |
| 1.0E-6                                 |                        | 96.45    |
| 10.0E-6                                |                        | 87.00    |
| <b>DIATRIZOIC ACID</b>                 |                        |          |
| 10.0E-9                                |                        | 87.08    |
| 100.0E-9                               |                        | 114.29   |
| 1.0E-6                                 |                        | 120.16   |
| 10.0E-6                                |                        | 57.35    |
| <b>DIAZOXIDE</b>                       |                        |          |
| 10.0E-9                                |                        | 126.76   |
| 100.0E-9                               |                        | 146.16   |
| 1.0E-6                                 |                        | 148.96   |
| 10.0E-6                                |                        | 120.53   |
| <b>DIBEKACIN</b>                       |                        |          |
| 10.0E-9                                |                        | 117.40   |
| 100.0E-9                               |                        | 115.33   |
| 1.0E-6                                 |                        | 109.59   |
| 10.0E-6                                |                        | 99.78    |
| <b>DIBENZOTHIOPHENE</b>                |                        |          |
| 10.0E-9                                |                        | 123.41   |
| 100.0E-9                               |                        | 109.08   |
| 1.0E-6                                 |                        | 110.76   |
| 10.0E-6                                |                        | 117.00   |
| <b>DIBUCAINE HYDROCHLORIDE</b>         |                        |          |
| 10.0E-9                                |                        | 97.75    |
| 100.0E-9                               |                        | 167.35   |
| 1.0E-6                                 |                        | 125.98   |
| 10.0E-6                                |                        | 147.72   |
| <b>DIBUTYL PHTHALATE</b>               |                        |          |
| 10.0E-9                                |                        | 109.28   |
| 100.0E-9                               |                        | 116.82   |
| 1.0E-6                                 |                        | 88.69    |
| 10.0E-6                                |                        | 132.30   |
| <b>DICHLORISONE ACETATE</b>            |                        |          |
| 10.0E-9                                |                        | 112.83   |
| 100.0E-9                               |                        | 121.94   |
| 1.0E-6                                 |                        | 126.54   |
| 10.0E-6                                |                        | 108.31   |
| <b>DICHLOROPHENE</b>                   |                        |          |
| 10.0E-9                                |                        | 96.31    |
| 100.0E-9                               |                        | 109.56   |
| 1.0E-6                                 |                        | 107.11   |
| 10.0E-6                                |                        | 151.63   |
| <b>DICHLORVOS</b>                      |                        |          |
| 10.0E-9                                |                        | 148.42   |
| 100.0E-9                               |                        | 100.23   |
| 1.0E-6                                 |                        | 98.75    |
| 10.0E-6                                |                        | 110.62   |
| <b>DICLOFENAC SODIUM</b>               |                        |          |
| 10.0E-9                                |                        | 82.50    |
| 100.0E-9                               |                        | 138.68   |
| 1.0E-6                                 |                        | 100.59   |
| 10.0E-6                                |                        | 145.13   |
| <b>DICLOXACILLIN SODIUM</b>            |                        |          |
| 10.0E-9                                |                        | 126.15   |
| 100.0E-9                               |                        | 134.63   |
| 1.0E-6                                 |                        | 134.80   |
| 10.0E-6                                |                        | 102.61   |
| <b>DICTAMNINE</b>                      |                        |          |
| 10.0E-9                                |                        | 103.43   |
| 100.0E-9                               |                        | 117.34   |
| 1.0E-6                                 |                        | 101.48   |
| 10.0E-6                                |                        | 96.09    |
| <b>DICUMAROL</b>                       |                        |          |
| 10.0E-9                                |                        | 87.04    |
| 100.0E-9                               |                        | 158.71   |
| 1.0E-6                                 |                        | 128.46   |
| 10.0E-6                                |                        | 93.90    |
| <b>DICYCLIMINE HYDROCHLORIDE</b>       |                        |          |
| 10.0E-9                                |                        | 146.31   |
| 100.0E-9                               |                        | 102.30   |
| 1.0E-6                                 |                        | 94.62    |
| 10.0E-6                                |                        | 131.78   |

| Compounds and Final Concentrations (M) | Average of % Viability                                                                 | Hits (✓) |
|----------------------------------------|----------------------------------------------------------------------------------------|----------|
| <b>DIENESTROL</b>                      |                                                                                        |          |
| 10.0E-9                                | ✓    | 140.92   |
| 100.0E-9                               | ✓    | 120.11   |
| 1.0E-6                                 | ✓    | 93.80    |
| 10.0E-6                                | ✓    | 130.03   |
| <b>DIETHYLCARBAMAZINE CITRATE</b>      |                                                                                        |          |
| 10.0E-9                                | ✓    | 103.04   |
| 100.0E-9                               | ✓    | 101.64   |
| 1.0E-6                                 | ✓    | 90.81    |
| 10.0E-6                                | ✓    | 85.51    |
| <b>DIETHYLSTILBESTROL</b>              |                                                                                        |          |
| 10.0E-9                                | ✓    | 96.13    |
| 100.0E-9                               | ✓    | 80.69    |
| 1.0E-6                                 | ✓    | 95.95    |
| 10.0E-6                                | ✓    | 104.55   |
| <b>DIETHYLTOLUAMIDE</b>                |                                                                                        |          |
| 10.0E-9                                | ✓    | 47.02    |
| 100.0E-9                               | ✓    | 117.66   |
| 1.0E-6                                 | ✓    | 89.55    |
| 10.0E-6                                | ✓    | 91.15    |
| <b>DIFRACTAIC ACID</b>                 |                                                                                        |          |
| 10.0E-9                                | ✓    | 87.79    |
| 100.0E-9                               | ✓    | 105.69   |
| 1.0E-6                                 | ✓    | 99.56    |
| 10.0E-6                                | ✓    | 87.25    |
| <b>DIFLORASONE DIACETATE</b>           |                                                                                        |          |
| 10.0E-9                                | ✓    | 122.73   |
| 100.0E-9                               | ✓    | 103.39   |
| 1.0E-6                                 | ✓    | 107.74   |
| 10.0E-6                                | ✓    | 122.55   |
| <b>DIFLUNISAL</b>                      |                                                                                        |          |
| 10.0E-9                                | ✓    | 113.05   |
| 100.0E-9                               | ✓    | 135.49   |
| 1.0E-6                                 | ✓    | 107.21   |
| 10.0E-6                                | ✓    | 105.90   |
| <b>DIFUCOL HEXAMETHYL ETHER</b>        |                                                                                        |          |
| 10.0E-9                                | ✓    | 102.56   |
| 100.0E-9                               | ✓    | 118.51   |
| 1.0E-6                                 | ✓   | 87.63    |
| 10.0E-6                                | ✓  | 95.56    |
| <b>DIGITONIN</b>                       |                                                                                        |          |
| 10.0E-9                                | ✓  | 89.54    |
| 100.0E-9                               | ✓  | 91.42    |
| 1.0E-6                                 | ✓  | 107.03   |
| 10.0E-6                                | ✓  | 6.21     |
| <b>DIGITOXIN</b>                       |                                                                                        |          |
| 10.0E-9                                | ✓  | 114.99   |
| 100.0E-9                               | ✓  | 149.44   |
| 1.0E-6                                 | ✓  | 97.50    |
| 10.0E-6                                | ✓  | 103.64   |
| <b>DIGOXIGENIN</b>                     |                                                                                        |          |
| 10.0E-9                                | ✓  | 95.68    |
| 100.0E-9                               | ✓  | 110.22   |
| 1.0E-6                                 | ✓  | 105.14   |
| 10.0E-6                                | ✓  | 86.35    |
| <b>DIGOXIN</b>                         |                                                                                        |          |
| 10.0E-9                                | ✓  | 96.77    |
| 100.0E-9                               | ✓  | 88.68    |
| 1.0E-6                                 | ✓  | 76.43    |
| 10.0E-6                                | ✓  | 117.77   |
| <b>DIHYDROCELASTROL</b>                |                                                                                        | ✓        |
| 10.0E-9                                | ✓  | 112.02   |
| 100.0E-9                               | ✓  | 115.53   |
| 1.0E-6                                 | ✓  | 100.02   |
| 10.0E-6                                | ✓  | 54.36    |
| <b>DIHYDROCELASTRYL DIACETATE</b>      |                                                                                        | ✓        |
| 10.0E-9                                | ✓  | 80.68    |
| 100.0E-9                               | ✓  | 93.80    |
| 1.0E-6                                 | ✓  | 80.65    |
| 10.0E-6                                | ✓  | 1.96     |
| <b>DIHYDROERGOTAMINE MESYLATE</b>      |                                                                                        |          |
| 10.0E-9                                | ✓  | 109.10   |
| 100.0E-9                               | ✓  | 137.80   |
| 1.0E-6                                 | ✓  | 110.32   |
| 10.0E-6                                | ✓  | 142.81   |
| <b>DIHYDROFISSINOLIDE</b>              |                                                                                        |          |
| 10.0E-9                                | ✓  | 146.51   |
| 100.0E-9                               | ✓  | 95.98    |
| 1.0E-6                                 | ✓  | 110.57   |
| 10.0E-6                                | ✓  | 88.95    |
| <b>DIHYDROFOLIC ACID</b>               |                                                                                        |          |
| 10.0E-9                                | ✓  | 75.70    |
| 100.0E-9                               | ✓  | 60.83    |
| 1.0E-6                                 | ✓  | 66.15    |
| 10.0E-6                                | ✓  | 133.57   |

| Compounds and Final Concentrations (M)              | Average of % Viability | Hits (✓) |
|-----------------------------------------------------|------------------------|----------|
| <b>DIHYDROGEDUNIC ACID, METHYL ESTER</b>            |                        |          |
| 10.0E-9                                             |                        | 89.84    |
| 100.0E-9                                            |                        | 119.74   |
| 1.0E-6                                              |                        | 104.76   |
| 10.0E-6                                             |                        | 116.17   |
| <b>DIHYDROGEDUNIN</b>                               |                        |          |
| 10.0E-9                                             |                        | 104.47   |
| 100.0E-9                                            |                        | 88.81    |
| 1.0E-6                                              |                        | 87.76    |
| 10.0E-6                                             |                        | 77.92    |
| <b>DIHYDROJASMONIC ACID</b>                         |                        |          |
| 10.0E-9                                             |                        | 109.16   |
| 100.0E-9                                            |                        | 138.32   |
| 1.0E-6                                              |                        | 118.91   |
| 10.0E-6                                             |                        | 98.31    |
| <b>DIHYDROMYRISTICIN</b>                            |                        |          |
| 10.0E-9                                             |                        | 69.51    |
| 100.0E-9                                            |                        | 92.34    |
| 1.0E-6                                              |                        | 107.18   |
| 10.0E-6                                             |                        | 111.75   |
| <b>DIHYDROSTREPTOMYCIN SULFATE</b>                  |                        |          |
| 10.0E-9                                             |                        | 134.86   |
| 100.0E-9                                            |                        | 115.84   |
| 1.0E-6                                              |                        | 95.26    |
| 10.0E-6                                             |                        | 109.38   |
| <b>DIHYDROTANSHINONE I</b>                          |                        |          |
| 10.0E-9                                             |                        | 99.18    |
| 100.0E-9                                            |                        | 87.76    |
| 1.0E-6                                              |                        | 111.32   |
| 10.0E-6                                             |                        | 61.63    |
| <b>DIHYDROXY (3alpha,12alpha)PREGNAN-20-ONE</b>     |                        |          |
| 10.0E-9                                             |                        | 107.45   |
| 100.0E-9                                            |                        | 107.00   |
| 1.0E-6                                              |                        | 93.18    |
| 10.0E-6                                             |                        | 99.63    |
| <b>DILOXANIDE FUROATE</b>                           |                        |          |
| 10.0E-9                                             |                        | 110.81   |
| 100.0E-9                                            |                        | 113.00   |
| 1.0E-6                                              |                        | 169.59   |
| 10.0E-6                                             |                        | 112.52   |
| <b>DILTIAZEM HYDROCHLORIDE</b>                      |                        |          |
| 10.0E-9                                             |                        | 78.85    |
| 100.0E-9                                            |                        | 136.62   |
| 1.0E-6                                              |                        | 112.57   |
| 10.0E-6                                             |                        | 108.26   |
| <b>DIMENHYDRINATE</b>                               |                        |          |
| 10.0E-9                                             |                        | 148.03   |
| 100.0E-9                                            |                        | 104.39   |
| 1.0E-6                                              |                        | 110.03   |
| 10.0E-6                                             |                        | 123.32   |
| <b>DIMERCAPROL</b>                                  |                        |          |
| 10.0E-9                                             |                        | 119.38   |
| 100.0E-9                                            |                        | 135.63   |
| 1.0E-6                                              |                        | 111.22   |
| 10.0E-6                                             |                        | 78.39    |
| <b>DIMETHADIONE</b>                                 |                        |          |
| 10.0E-9                                             |                        | 128.06   |
| 100.0E-9                                            |                        | 134.63   |
| 1.0E-6                                              |                        | 136.99   |
| 10.0E-6                                             |                        | 99.12    |
| <b>DIMETHYL 4,4-o-PHENYLENE-BIS (3-THIOPHANATE)</b> |                        |          |
| 10.0E-9                                             |                        | 123.07   |
| 100.0E-9                                            |                        | 136.13   |
| 1.0E-6                                              |                        | 107.62   |
| 10.0E-6                                             |                        | 88.79    |
| <b>DIMETHYLCAFFEIC ACID</b>                         |                        |          |
| 10.0E-9                                             |                        | 113.94   |
| 100.0E-9                                            |                        | 104.85   |
| 1.0E-6                                              |                        | 99.21    |
| 10.0E-6                                             |                        | 124.96   |
| <b>DINITOLMIDE</b>                                  |                        |          |
| 10.0E-9                                             |                        | 114.73   |
| 100.0E-9                                            |                        | 136.06   |
| 1.0E-6                                              |                        | 127.77   |
| 10.0E-6                                             |                        | 128.82   |
| <b>DIOSGENIN</b>                                    |                        |          |
| 10.0E-9                                             |                        | 122.76   |
| 100.0E-9                                            |                        | 99.83    |
| 1.0E-6                                              |                        | 107.07   |
| 10.0E-6                                             |                        | 80.31    |
| <b>DIOSMETIN</b>                                    |                        |          |
| 10.0E-9                                             |                        | 101.93   |
| 100.0E-9                                            |                        | 98.46    |
| 1.0E-6                                              |                        | 114.89   |
| 10.0E-6                                             |                        | 93.26    |

| Compounds and Final Concentrations (M) | Average of % Viability | Hits (✓) |
|----------------------------------------|------------------------|----------|
| <b>DIOSMIN</b>                         |                        |          |
| 10.0E-9                                |                        | 99.69    |
| 100.0E-9                               |                        | 82.43    |
| 1.0E-6                                 |                        | 96.37    |
| 10.0E-6                                |                        | 114.19   |
| <b>DIOXYBENZONE</b>                    |                        |          |
| 10.0E-9                                |                        | 108.99   |
| 100.0E-9                               |                        | 129.01   |
| 1.0E-6                                 |                        | 116.78   |
| 10.0E-6                                |                        | 113.97   |
| <b>DIPERODON HYDROCHLORIDE</b>         |                        |          |
| 10.0E-9                                |                        | 90.76    |
| 100.0E-9                               |                        | 101.04   |
| 1.0E-6                                 |                        | 82.09    |
| 10.0E-6                                |                        | 76.87    |
| <b>DIPHENHYDRAMINE HYDROCHLORIDE</b>   |                        |          |
| 10.0E-9                                |                        | 83.97    |
| 100.0E-9                               |                        | 97.06    |
| 1.0E-6                                 |                        | 96.44    |
| 10.0E-6                                |                        | 138.29   |
| <b>DIPHENYLPYRALINE HYDROCHLORIDE</b>  |                        |          |
| 10.0E-9                                |                        | 90.92    |
| 100.0E-9                               |                        | 107.21   |
| 1.0E-6                                 |                        | 90.96    |
| 10.0E-6                                |                        | 113.84   |
| <b>DIPLOSALSALATE</b>                  |                        |          |
| 10.0E-9                                |                        | 118.12   |
| 100.0E-9                               |                        | 87.77    |
| 1.0E-6                                 |                        | 106.10   |
| 10.0E-6                                |                        | 12.05    |
| <b>DIPTERYXIN</b>                      |                        |          |
| 10.0E-9                                |                        | 134.27   |
| 100.0E-9                               |                        | 120.34   |
| 1.0E-6                                 |                        | 132.74   |
| 10.0E-6                                |                        | 91.71    |
| <b>DIPYRIDAMOLE</b>                    |                        |          |
| 10.0E-9                                |                        | 103.53   |
| 100.0E-9                               |                        | 95.06    |
| 1.0E-6                                 |                        | 90.96    |
| 10.0E-6                                |                        | 95.64    |
| <b>DIPYROCETYL</b>                     |                        |          |
| 10.0E-9                                |                        | 98.29    |
| 100.0E-9                               |                        | 108.09   |
| 1.0E-6                                 |                        | 120.33   |
| 10.0E-6                                |                        | 63.48    |
| <b>DIPYRONE</b>                        |                        |          |
| 10.0E-9                                |                        | 112.86   |
| 100.0E-9                               |                        | 90.25    |
| 1.0E-6                                 |                        | 103.91   |
| 10.0E-6                                |                        | 81.02    |
| <b>DIRITHROMYCIN</b>                   |                        |          |
| 10.0E-9                                |                        | 109.19   |
| 100.0E-9                               |                        | 170.30   |
| 1.0E-6                                 |                        | 150.89   |
| 10.0E-6                                |                        | 107.64   |
| <b>DISOPYRAMIDE PHOSPHATE</b>          |                        |          |
| 10.0E-9                                |                        | 97.69    |
| 100.0E-9                               |                        | 132.96   |
| 1.0E-6                                 |                        | 87.88    |
| 10.0E-6                                |                        | 99.90    |
| <b>DISULFIRAM</b>                      |                        |          |
| 10.0E-9                                |                        | 146.62   |
| 100.0E-9                               |                        | 92.57    |
| 1.0E-6                                 |                        | -0.62    |
| 10.0E-6                                |                        | 2.33     |
| <b>DJENKOLIC ACID</b>                  |                        |          |
| 10.0E-9                                |                        | 149.69   |
| 100.0E-9                               |                        | 151.61   |
| 1.0E-6                                 |                        | 98.29    |
| 10.0E-6                                |                        | 96.20    |
| <b>D-LACTITOL MONOHYDRATE</b>          |                        |          |
| 10.0E-9                                |                        | 95.64    |
| 100.0E-9                               |                        | 109.94   |
| 1.0E-6                                 |                        | 119.52   |
| 10.0E-6                                |                        | 109.66   |
| <b>DOBUTAMINE HYDROCHLORIDE</b>        |                        |          |
| 10.0E-9                                |                        | 81.95    |
| 100.0E-9                               |                        | 75.09    |
| 1.0E-6                                 |                        | 78.79    |
| 10.0E-6                                |                        | 71.57    |
| <b>DOCOSANOL</b>                       |                        |          |
| 10.0E-9                                |                        | 65.00    |
| 100.0E-9                               |                        | 120.79   |
| 1.0E-6                                 |                        | 132.49   |
| 10.0E-6                                |                        | 70.15    |

| Compounds and Final Concentrations (M) | Average of % Viability | Hits (✓) |
|----------------------------------------|------------------------|----------|
| <b>DOMPERIDONE</b>                     |                        |          |
| 10.0E-9                                |                        | 112.17   |
| 100.0E-9                               |                        | 151.00   |
| 1.0E-6                                 |                        | 130.35   |
| 10.0E-6                                |                        | 118.74   |
| <b>DONEPEZIL HYDROCHLORIDE</b>         |                        |          |
| 10.0E-9                                |                        | 93.98    |
| 100.0E-9                               |                        | 117.51   |
| 1.0E-6                                 |                        | 93.86    |
| 10.0E-6                                |                        | 91.23    |
| <b>DOPAMINE HYDROCHLORIDE</b>          |                        |          |
| 10.0E-9                                |                        | 113.93   |
| 100.0E-9                               |                        | 126.97   |
| 1.0E-6                                 |                        | 99.08    |
| 10.0E-6                                |                        | 115.19   |
| <b>DOXAZOSIN MESYLATE</b>              |                        |          |
| 10.0E-9                                |                        | 91.73    |
| 100.0E-9                               |                        | 118.37   |
| 1.0E-6                                 |                        | 105.84   |
| 10.0E-6                                |                        | 113.81   |
| <b>DOXEPIH HYDROCHLORIDE</b>           |                        |          |
| 10.0E-9                                |                        | 114.10   |
| 100.0E-9                               |                        | 115.52   |
| 1.0E-6                                 |                        | 95.12    |
| 10.0E-6                                |                        | 97.25    |
| <b>DOXIFLURIDINE</b>                   |                        |          |
| 10.0E-9                                |                        | 75.17    |
| 100.0E-9                               |                        | 115.94   |
| 1.0E-6                                 |                        | 142.38   |
| 10.0E-6                                |                        | 83.59    |
| <b>DOXORUBICIN</b>                     |                        |          |
| 10.0E-9                                |                        | 110.28   |
| 100.0E-9                               |                        | 88.35    |
| 1.0E-6                                 |                        | 70.41    |
| 10.0E-6                                |                        | 17.05    |
| <b>DOXYCYCLINE HYDROCHLORIDE</b>       |                        |          |
| 10.0E-9                                |                        | 125.52   |
| 100.0E-9                               |                        | 93.92    |
| 1.0E-6                                 |                        | 106.12   |
| 10.0E-6                                |                        | 62.02    |
| <b>DOXYLAMINE SUCCINATE</b>            |                        |          |
| 10.0E-9                                |                        | 76.82    |
| 100.0E-9                               |                        | 96.36    |
| 1.0E-6                                 |                        | 97.76    |
| 10.0E-6                                |                        | 116.48   |
| <b>D-PHENYLALANINE</b>                 |                        |          |
| 10.0E-9                                |                        | 81.90    |
| 100.0E-9                               |                        | 129.52   |
| 1.0E-6                                 |                        | 81.63    |
| 10.0E-6                                |                        | 104.84   |
| <b>DROFENINE HYDROCHLORIDE</b>         |                        |          |
| 10.0E-9                                |                        | 110.10   |
| 100.0E-9                               |                        | 144.74   |
| 1.0E-6                                 |                        | 102.73   |
| 10.0E-6                                |                        | 57.93    |
| <b>DROPERIDOL</b>                      |                        |          |
| 10.0E-9                                |                        | 87.08    |
| 100.0E-9                               |                        | 80.64    |
| 1.0E-6                                 |                        | 95.79    |
| 10.0E-6                                |                        | 132.03   |
| <b>DROPROPIZINE</b>                    |                        |          |
| 10.0E-9                                |                        | 93.55    |
| 100.0E-9                               |                        | 108.08   |
| 1.0E-6                                 |                        | 74.35    |
| 10.0E-6                                |                        | 100.17   |
| <b>DUARTIN (-)</b>                     |                        |          |
| 10.0E-9                                |                        | 106.36   |
| 100.0E-9                               |                        | 118.32   |
| 1.0E-6                                 |                        | 126.49   |
| 10.0E-6                                |                        | 89.39    |
| <b>DUARTIN, DIMETHYL ETHER</b>         |                        |          |
| 10.0E-9                                |                        | 105.43   |
| 100.0E-9                               |                        | 125.51   |
| 1.0E-6                                 |                        | 126.55   |
| 10.0E-6                                |                        | 111.57   |
| <b>DULOXETINE HYDROCHLORIDE</b>        |                        |          |
| 10.0E-9                                |                        | 110.42   |
| 100.0E-9                               |                        | 81.92    |
| 1.0E-6                                 |                        | 112.82   |
| 10.0E-6                                |                        | 58.31    |
| <b>DYCLONINE HYDROCHLORIDE</b>         |                        |          |
| 10.0E-9                                |                        | 71.75    |
| 100.0E-9                               |                        | 126.05   |
| 1.0E-6                                 |                        | 95.71    |
| 10.0E-6                                |                        | 98.35    |



| Compounds and Final Concentrations (M)             | Average of % Viability | Hits (✓) |
|----------------------------------------------------|------------------------|----------|
| <b>DYPHYLLINE</b>                                  |                        |          |
| 10.0E-9                                            |                        | 74.22    |
| 100.0E-9                                           |                        | 78.44    |
| 1.0E-6                                             |                        | 72.03    |
| 10.0E-6                                            |                        | 59.83    |
| <b>EBSELEN</b>                                     |                        |          |
| 10.0E-9                                            |                        | 94.44    |
| 100.0E-9                                           |                        | 146.70   |
| 1.0E-6                                             |                        | 134.60   |
| 10.0E-6                                            |                        | 43.07    |
| <b>ECONAZOLE NITRATE</b>                           |                        |          |
| 10.0E-9                                            |                        | 75.73    |
| 100.0E-9                                           |                        | 92.13    |
| 1.0E-6                                             |                        | 58.88    |
| 10.0E-6                                            |                        | 27.00    |
| <b>EDOXUDINE</b>                                   |                        |          |
| 10.0E-9                                            |                        | 97.99    |
| 100.0E-9                                           |                        | 73.00    |
| 1.0E-6                                             |                        | 95.10    |
| 10.0E-6                                            |                        | 96.97    |
| <b>EDROPHONIUM CHLORIDE</b>                        |                        |          |
| 10.0E-9                                            |                        | 70.76    |
| 100.0E-9                                           |                        | 55.78    |
| 1.0E-6                                             |                        | 60.21    |
| 10.0E-6                                            |                        | 117.94   |
| <b>EFAROXAN HYDROCHLORIDE</b>                      |                        |          |
| 10.0E-9                                            |                        | 85.32    |
| 100.0E-9                                           |                        | 94.98    |
| 1.0E-6                                             |                        | 111.85   |
| 10.0E-6                                            |                        | 105.76   |
| <b>EFLOXATE</b>                                    |                        |          |
| 10.0E-9                                            |                        | 102.72   |
| 100.0E-9                                           |                        | 120.10   |
| 1.0E-6                                             |                        | 111.94   |
| 10.0E-6                                            |                        | 98.26    |
| <b>ELAIDYLPHOSPHOCHOLINE</b>                       |                        |          |
| 10.0E-9                                            |                        | 98.03    |
| 100.0E-9                                           |                        | 69.63    |
| 1.0E-6                                             |                        | 130.38   |
| 10.0E-6                                            |                        | 105.77   |
| <b>ELETRIPTAN HYDROBROMIDE</b>                     |                        |          |
| 10.0E-9                                            |                        | 90.81    |
| 100.0E-9                                           |                        | 121.94   |
| 1.0E-6                                             |                        | 104.18   |
| 10.0E-6                                            |                        | 95.56    |
| <b>ELLAGIC ACID</b>                                |                        |          |
| 10.0E-9                                            |                        | 105.38   |
| 100.0E-9                                           |                        | 94.69    |
| 1.0E-6                                             |                        | 96.52    |
| 10.0E-6                                            |                        | 90.50    |
| <b>EMETINE</b>                                     |                        |          |
| 10.0E-9                                            |                        | 84.93    |
| 100.0E-9                                           |                        | 93.81    |
| 1.0E-6                                             |                        | 73.64    |
| 10.0E-6                                            |                        | 1.11     |
| <b>EMODIN</b>                                      |                        |          |
| 10.0E-9                                            |                        | 117.49   |
| 100.0E-9                                           |                        | 128.55   |
| 1.0E-6                                             |                        | 101.74   |
| 10.0E-6                                            |                        | 82.27    |
| <b>ENALAPRIL MALEATE</b>                           |                        |          |
| 10.0E-9                                            |                        | 76.39    |
| 100.0E-9                                           |                        | 129.31   |
| 1.0E-6                                             |                        | 98.88    |
| 10.0E-6                                            |                        | 134.53   |
| <b>ENILCONAZOLE</b>                                |                        |          |
| 10.0E-9                                            |                        | 86.00    |
| 100.0E-9                                           |                        | 107.48   |
| 1.0E-6                                             |                        | 84.35    |
| 10.0E-6                                            |                        | 93.21    |
| <b>ENOXACIN</b>                                    |                        |          |
| 10.0E-9                                            |                        | 93.77    |
| 100.0E-9                                           |                        | 82.49    |
| 1.0E-6                                             |                        | 75.00    |
| 10.0E-6                                            |                        | 48.55    |
| <b>ENOXAPARIN SODIUM (1% wt/vol in 10%aq DMSO)</b> |                        |          |
| 10.0E-9                                            |                        | 117.83   |
| 100.0E-9                                           |                        | 102.30   |
| 1.0E-6                                             |                        | 114.20   |
| 10.0E-6                                            |                        | 129.67   |
| <b>ENOXOLONE</b>                                   |                        |          |
| 10.0E-9                                            |                        | 95.74    |
| 100.0E-9                                           |                        | 142.47   |
| 1.0E-6                                             |                        | 102.67   |
| 10.0E-6                                            |                        | 110.22   |

| Compounds and Final Concentrations (M)      | Average of % Viability | Hits (✓) |
|---------------------------------------------|------------------------|----------|
| <b>ENROFLOXACIN</b>                         |                        |          |
| 10.0E-9                                     |                        | 96.36    |
| 100.0E-9                                    |                        | 98.38    |
| 1.0E-6                                      |                        | 128.78   |
| 10.0E-6                                     |                        | 131.62   |
| <b>ENTANDROPHRAGMIN</b>                     |                        |          |
| 10.0E-9                                     |                        | 106.34   |
| 100.0E-9                                    |                        | 139.82   |
| 1.0E-6                                      |                        | 106.19   |
| 10.0E-6                                     |                        | 84.78    |
| <b>EPI(13)TORULOSOL</b>                     |                        |          |
| 10.0E-9                                     |                        | 119.05   |
| 100.0E-9                                    |                        | 128.84   |
| 1.0E-6                                      |                        | 94.69    |
| 10.0E-6                                     |                        | 80.42    |
| <b>EPIAFZELECHIN (2R,3R)(-)</b>             |                        |          |
| 10.0E-9                                     |                        | 90.05    |
| 100.0E-9                                    |                        | 110.26   |
| 1.0E-6                                      |                        | 108.99   |
| 10.0E-6                                     |                        | 127.98   |
| <b>EPIAFZELECHIN TRIMETHYL ETHER</b>        |                        |          |
| 10.0E-9                                     |                        | 123.81   |
| 100.0E-9                                    |                        | 118.47   |
| 1.0E-6                                      |                        | 129.24   |
| 10.0E-6                                     |                        | 106.27   |
| <b>EPIANDROSTERONE</b>                      |                        |          |
| 10.0E-9                                     |                        | 112.17   |
| 100.0E-9                                    |                        | 90.86    |
| 1.0E-6                                      |                        | 111.66   |
| 10.0E-6                                     |                        | 84.79    |
| <b>EPICATECHIN</b>                          |                        |          |
| 10.0E-9                                     |                        | 86.16    |
| 100.0E-9                                    |                        | 87.02    |
| 1.0E-6                                      |                        | 116.97   |
| 10.0E-6                                     |                        | 81.00    |
| <b>EPICATECHIN MONOGALLATE</b>              |                        |          |
| 10.0E-9                                     |                        | 118.98   |
| 100.0E-9                                    |                        | 106.32   |
| 1.0E-6                                      |                        | 93.82    |
| 10.0E-6                                     |                        | 83.40    |
| <b>EPICATECHIN PENTAACETATE</b>             |                        |          |
| 10.0E-9                                     |                        | 110.26   |
| 100.0E-9                                    |                        | 117.22   |
| 1.0E-6                                      |                        | 75.38    |
| 10.0E-6                                     |                        | 80.31    |
| <b>EPIESTRIOL</b>                           |                        |          |
| 10.0E-9                                     |                        | 111.92   |
| 100.0E-9                                    |                        | 121.95   |
| 1.0E-6                                      |                        | 97.91    |
| 10.0E-6                                     |                        | 92.47    |
| <b>EPIGALLOTECHIN</b>                       |                        |          |
| 10.0E-9                                     |                        | 71.69    |
| 100.0E-9                                    |                        | 128.09   |
| 1.0E-6                                      |                        | 121.28   |
| 10.0E-6                                     |                        | 90.56    |
| <b>EPIGALLOTECHIN 3,5-DIGALLATE</b>         |                        |          |
| 10.0E-9                                     |                        | 96.71    |
| 100.0E-9                                    |                        | 82.10    |
| 1.0E-6                                      |                        | 70.95    |
| 10.0E-6                                     |                        | 89.56    |
| <b>EPIGALLOTECHIN-3-MONOGALLATE</b>         |                        |          |
| 10.0E-9                                     |                        | 136.28   |
| 100.0E-9                                    |                        | 126.26   |
| 1.0E-6                                      |                        | 120.34   |
| 10.0E-6                                     |                        | 80.31    |
| <b>EPIRUBICIN HYDROCHLORIDE</b>             |                        |          |
| 10.0E-9                                     |                        | 104.08   |
| 100.0E-9                                    |                        | 81.77    |
| 1.0E-6                                      |                        | 79.49    |
| 10.0E-6                                     |                        | 13.41    |
| <b>EPITESTOSTERONE</b>                      |                        |          |
| 10.0E-9                                     |                        | 111.57   |
| 100.0E-9                                    |                        | 111.96   |
| 1.0E-6                                      |                        | 110.36   |
| 10.0E-6                                     |                        | 88.08    |
| <b>EPOXY (4,5alpha)-4,5-DIHYDROSANTONIN</b> |                        |          |
| 10.0E-9                                     |                        | 81.27    |
| 100.0E-9                                    |                        | 100.54   |
| 1.0E-6                                      |                        | 95.78    |
| 10.0E-6                                     |                        | 86.47    |
| <b>EPOXYGEDUNIN</b>                         |                        |          |
| 10.0E-9                                     |                        | 108.33   |
| 100.0E-9                                    |                        | 95.70    |
| 1.0E-6                                      |                        | 102.87   |
| 10.0E-6                                     |                        | 101.73   |

| Compounds and Final Concentrations (M) | Average of % Viability | Hits (✓) |
|----------------------------------------|------------------------|----------|
| <b>EQUILIN</b>                         |                        |          |
| 10.0E-9                                |                        | 74.75    |
| 100.0E-9                               |                        | 141.50   |
| 1.0E-6                                 |                        | 109.88   |
| 10.0E-6                                |                        | 115.19   |
| <b>ERGOCALCIFEROL</b>                  |                        |          |
| 10.0E-9                                |                        | 77.78    |
| 100.0E-9                               |                        | 113.94   |
| 1.0E-6                                 |                        | 101.95   |
| 10.0E-6                                |                        | 97.12    |
| <b>ERGONOVINE MALEATE</b>              |                        |          |
| 10.0E-9                                |                        | 81.55    |
| 100.0E-9                               |                        | 111.10   |
| 1.0E-6                                 |                        | 107.20   |
| 10.0E-6                                |                        | 116.35   |
| <b>ERGOSTEROL</b>                      |                        |          |
| 10.0E-9                                |                        | 95.75    |
| 100.0E-9                               |                        | 103.52   |
| 1.0E-6                                 |                        | 118.60   |
| 10.0E-6                                |                        | 79.26    |
| <b>ERGOSTEROL ACETATE</b>              |                        |          |
| 10.0E-9                                |                        | 118.94   |
| 100.0E-9                               |                        | 106.16   |
| 1.0E-6                                 |                        | 117.71   |
| 10.0E-6                                |                        | 93.58    |
| <b>ERGOTAMINE TARTRATE</b>             |                        |          |
| 10.0E-9                                |                        | 102.30   |
| 100.0E-9                               |                        | 120.28   |
| 1.0E-6                                 |                        | 119.52   |
| 10.0E-6                                |                        | 145.51   |
| <b>ERYTHROMYCIN</b>                    |                        |          |
| 10.0E-9                                |                        | 86.66    |
| 100.0E-9                               |                        | 115.06   |
| 1.0E-6                                 |                        | 95.95    |
| 10.0E-6                                |                        | 100.37   |
| <b>ERYTHROMYCIN ESTOLATE</b>           |                        |          |
| 10.0E-9                                |                        | 111.09   |
| 100.0E-9                               |                        | 107.10   |
| 1.0E-6                                 |                        | 99.33    |
| 10.0E-6                                |                        | 99.62    |
| <b>ERYTHROMYCIN ETHYLSUCCINATE</b>     |                        |          |
| 10.0E-9                                |                        | 92.23    |
| 100.0E-9                               |                        | 117.73   |
| 1.0E-6                                 |                        | 101.82   |
| 10.0E-6                                |                        | 117.58   |
| <b>ERYTHROMYCIN STEARATE</b>           |                        |          |
| 10.0E-9                                |                        | 111.06   |
| 100.0E-9                               |                        | 122.89   |
| 1.0E-6                                 |                        | 108.96   |
| 10.0E-6                                |                        | 146.43   |
| <b>ERYTHROSE</b>                       |                        |          |
| 10.0E-9                                |                        | 108.08   |
| 100.0E-9                               |                        | 135.23   |
| 1.0E-6                                 |                        | 157.42   |
| 10.0E-6                                |                        | 112.77   |
| <b>ERYTHROSINE SODIUM</b>              |                        |          |
| 10.0E-9                                |                        | 80.25    |
| 100.0E-9                               |                        | 124.38   |
| 1.0E-6                                 |                        | 69.27    |
| 10.0E-6                                |                        | 71.13    |
| <b>ESCITALOPRAM OXALATE</b>            |                        |          |
| 10.0E-9                                |                        | 123.30   |
| 100.0E-9                               |                        | 100.27   |
| 1.0E-6                                 |                        | 109.73   |
| 10.0E-6                                |                        | 107.61   |
| <b>ESCULETIN</b>                       |                        |          |
| 10.0E-9                                |                        | 130.61   |
| 100.0E-9                               |                        | 78.28    |
| 1.0E-6                                 |                        | 119.81   |
| 10.0E-6                                |                        | 77.47    |
| <b>ESEROLINE FUMARATE</b>              |                        |          |
| 10.0E-9                                |                        | 129.66   |
| 100.0E-9                               |                        | 94.69    |
| 1.0E-6                                 |                        | 116.01   |
| 10.0E-6                                |                        | 49.92    |
| <b>ESTRADIOL</b>                       |                        |          |
| 10.0E-9                                |                        | 94.73    |
| 100.0E-9                               |                        | 80.20    |
| 1.0E-6                                 |                        | 104.67   |
| 10.0E-6                                |                        | 125.26   |
| <b>ESTRADIOL ACETATE</b>               |                        |          |
| 10.0E-9                                |                        | 76.41    |
| 100.0E-9                               |                        | 92.53    |
| 1.0E-6                                 |                        | 121.55   |
| 10.0E-6                                |                        | 110.71   |

| Compounds and Final Concentrations (M)  | Average of % Viability | Hits (✓) |
|-----------------------------------------|------------------------|----------|
| <b>ESTRADIOL BENZOATE</b>               |                        |          |
| 10.0E-9                                 | ✓                      | 115.08   |
| 100.0E-9                                | ✓                      | 93.20    |
| 1.0E-6                                  | ✓                      | 104.88   |
| 10.0E-6                                 | ✓                      | 108.52   |
| <b>ESTRADIOL CYPIONATE</b>              |                        |          |
| 10.0E-9                                 | ✓                      | 127.25   |
| 100.0E-9                                | ✓                      | 77.52    |
| 1.0E-6                                  | ✓                      | 67.05    |
| 10.0E-6                                 | ✓                      | 67.89    |
| <b>ESTRADIOL METHYL ETHER</b>           |                        |          |
| 10.0E-9                                 | ✓                      | 84.66    |
| 100.0E-9                                | ✓                      | 106.57   |
| 1.0E-6                                  | ✓                      | 117.89   |
| 10.0E-6                                 | ✓                      | 76.67    |
| <b>ESTRADIOL VALERATE</b>               |                        |          |
| 10.0E-9                                 | ✓                      | 94.97    |
| 100.0E-9                                | ✓                      | 76.59    |
| 1.0E-6                                  | ✓                      | 77.40    |
| 10.0E-6                                 | ✓                      | 99.71    |
| <b>ESTRADIOL-3-SULFATE, SODIUM SALT</b> |                        |          |
| 10.0E-9                                 | ✓                      | 123.07   |
| 100.0E-9                                | ✓                      | 107.65   |
| 1.0E-6                                  | ✓                      | 111.62   |
| 10.0E-6                                 | ✓                      | 108.32   |
| <b>ESTRAGOLE</b>                        |                        |          |
| 10.0E-9                                 | ✓                      | 97.25    |
| 100.0E-9                                | ✓                      | 87.87    |
| 1.0E-6                                  | ✓                      | 111.42   |
| 10.0E-6                                 | ✓                      | 80.16    |
| <b>ESTRIOL</b>                          |                        |          |
| 10.0E-9                                 | ✓                      | 97.51    |
| 100.0E-9                                | ✓                      | 97.75    |
| 1.0E-6                                  | ✓                      | 78.73    |
| 10.0E-6                                 | ✓                      | 136.42   |
| <b>ESTRONE</b>                          |                        |          |
| 10.0E-9                                 | ✓                      | 65.06    |
| 100.0E-9                                | ✓                      | 113.26   |
| 1.0E-6                                  | ✓                      | 95.05    |
| 10.0E-6                                 | ✓                      | 120.55   |
| <b>ESTRONE BENZOATE</b>                 |                        |          |
| 10.0E-9                                 | ✓                      | 73.32    |
| 100.0E-9                                | ✓                      | 79.40    |
| 1.0E-6                                  | ✓                      | 78.39    |
| 10.0E-6                                 | ✓                      | 97.28    |
| <b>ESTROPIPATE</b>                      |                        |          |
| 10.0E-9                                 | ✓                      | 122.10   |
| 100.0E-9                                | ✓                      | 119.06   |
| 1.0E-6                                  | ✓                      | 101.18   |
| 10.0E-6                                 | ✓                      | 103.42   |
| <b>ETHACRIDINE LACTATE</b>              |                        |          |
| 10.0E-9                                 | ✓                      | 130.44   |
| 100.0E-9                                | ✓                      | 111.76   |
| 1.0E-6                                  | ✓                      | 95.81    |
| 10.0E-6                                 | ✓                      | 62.15    |
| <b>ETHACRYNIC ACID</b>                  |                        |          |
| 10.0E-9                                 | ✓                      | 73.41    |
| 100.0E-9                                | ✓                      | 127.24   |
| 1.0E-6                                  | ✓                      | 80.04    |
| 10.0E-6                                 | ✓                      | 118.03   |
| <b>ETHAMBUTOL HYDROCHLORIDE</b>         |                        |          |
| 10.0E-9                                 | ✓                      | 87.15    |
| 100.0E-9                                | ✓                      | 86.96    |
| 1.0E-6                                  | ✓                      | 103.63   |
| 10.0E-6                                 | ✓                      | 115.13   |
| <b>ETHAMIVAN</b>                        |                        |          |
| 10.0E-9                                 | ✓                      | 92.63    |
| 100.0E-9                                | ✓                      | 111.15   |
| 1.0E-6                                  | ✓                      | 123.24   |
| 10.0E-6                                 | ✓                      | 109.30   |
| <b>ETHAVERINE HYDROCHLORIDE</b>         |                        |          |
| 10.0E-9                                 | ✓                      | 105.50   |
| 100.0E-9                                | ✓                      | 92.58    |
| 1.0E-6                                  | ✓                      | 127.24   |
| 10.0E-6                                 | ✓                      | 39.78    |
| <b>ETHINYL ESTRADIOL</b>                |                        |          |
| 10.0E-9                                 | ✓                      | 92.75    |
| 100.0E-9                                | ✓                      | 98.14    |
| 1.0E-6                                  | ✓                      | 101.63   |
| 10.0E-6                                 | ✓                      | 108.16   |
| <b>ETHIONAMIDE</b>                      |                        |          |
| 10.0E-9                                 | ✓                      | 102.09   |
| 100.0E-9                                | ✓                      | 116.23   |
| 1.0E-6                                  | ✓                      | 90.56    |
| 10.0E-6                                 | ✓                      | 109.00   |

| Compounds and Final Concentrations (M)   | Average of % Viability | Hits (✓) |
|------------------------------------------|------------------------|----------|
| <b>ETHIONINE</b>                         |                        |          |
| 10.0E-9                                  |                        | 123.79   |
| 100.0E-9                                 |                        | 85.46    |
| 1.0E-6                                   |                        | 157.15   |
| 10.0E-6                                  |                        | 120.22   |
| <b>ETHOPROPAZINE HYDROCHLORIDE</b>       |                        |          |
| 10.0E-9                                  |                        | 84.79    |
| 100.0E-9                                 |                        | 84.10    |
| 1.0E-6                                   |                        | 84.59    |
| 10.0E-6                                  |                        | 131.45   |
| <b>ETHOSUXIMIDE</b>                      |                        |          |
| 10.0E-9                                  |                        | 92.20    |
| 100.0E-9                                 |                        | 88.61    |
| 1.0E-6                                   |                        | 105.67   |
| 10.0E-6                                  |                        | 122.09   |
| <b>ETHOXYQUIN</b>                        |                        |          |
| 10.0E-9                                  |                        | 97.91    |
| 100.0E-9                                 |                        | 84.89    |
| 1.0E-6                                   |                        | 94.71    |
| 10.0E-6                                  |                        | 123.21   |
| <b>ETHOXZOLAMIDE</b>                     |                        |          |
| 10.0E-9                                  |                        | 97.08    |
| 100.0E-9                                 |                        | 109.19   |
| 1.0E-6                                   |                        | 109.82   |
| 10.0E-6                                  |                        | 75.17    |
| <b>ETHYL PARABEN</b>                     |                        |          |
| 10.0E-9                                  |                        | 129.54   |
| 100.0E-9                                 |                        | 130.90   |
| 1.0E-6                                   |                        | 103.55   |
| 10.0E-6                                  |                        | 113.80   |
| <b>ETHYLNOREPINEPHRINE HYDROCHLORIDE</b> |                        |          |
| 10.0E-9                                  |                        | 92.27    |
| 100.0E-9                                 |                        | 74.79    |
| 1.0E-6                                   |                        | 75.79    |
| 10.0E-6                                  |                        | 115.92   |
| <b>ETHYNOIDIOL DIACETATE</b>             |                        |          |
| 10.0E-9                                  |                        | 138.65   |
| 100.0E-9                                 |                        | 114.36   |
| 1.0E-6                                   |                        | 101.66   |
| 10.0E-6                                  |                        | 119.89   |
| <b>ETICLOPRIDE HYDROCHLORIDE</b>         |                        |          |
| 10.0E-9                                  |                        | 103.63   |
| 100.0E-9                                 |                        | 133.21   |
| 1.0E-6                                   |                        | 69.16    |
| 10.0E-6                                  |                        | 111.26   |
| <b>ETIDRONATE DISODIUM</b>               |                        |          |
| 10.0E-9                                  |                        | 113.53   |
| 100.0E-9                                 |                        | 84.69    |
| 1.0E-6                                   |                        | 121.01   |
| 10.0E-6                                  |                        | 115.88   |
| <b>ETODOLAC</b>                          |                        |          |
| 10.0E-9                                  |                        | 91.52    |
| 100.0E-9                                 |                        | 112.18   |
| 1.0E-6                                   |                        | 92.43    |
| 10.0E-6                                  |                        | 172.95   |
| <b>ETOMIDATE</b>                         |                        |          |
| 10.0E-9                                  |                        | 84.67    |
| 100.0E-9                                 |                        | 106.32   |
| 1.0E-6                                   |                        | 89.72    |
| 10.0E-6                                  |                        | 83.00    |
| <b>ETOPOSIDE</b>                         |                        |          |
| 10.0E-9                                  |                        | 60.02    |
| 100.0E-9                                 |                        | 122.00   |
| 1.0E-6                                   |                        | 89.00    |
| 10.0E-6                                  |                        | 72.47    |
| <b>EUCATROPINE HYDROCHLORIDE</b>         |                        |          |
| 10.0E-9                                  |                        | 83.77    |
| 100.0E-9                                 |                        | 91.71    |
| 1.0E-6                                   |                        | 95.36    |
| 10.0E-6                                  |                        | 114.35   |
| <b>EUGENOL</b>                           |                        |          |
| 10.0E-9                                  |                        | 71.26    |
| 100.0E-9                                 |                        | 104.52   |
| 1.0E-6                                   |                        | 113.32   |
| 10.0E-6                                  |                        | 100.74   |
| <b>EUPARIN</b>                           |                        |          |
| 10.0E-9                                  |                        | 99.69    |
| 100.0E-9                                 |                        | 144.08   |
| 1.0E-6                                   |                        | 117.71   |
| 10.0E-6                                  |                        | 129.86   |
| <b>EUPHOL</b>                            |                        |          |
| 10.0E-9                                  |                        | 105.94   |
| 100.0E-9                                 |                        | 87.82    |
| 1.0E-6                                   |                        | 124.49   |
| 10.0E-6                                  |                        | 89.87    |

| Compounds and Final Concentrations (M) | Average of % Viability | Hits (✓) |
|----------------------------------------|------------------------|----------|
| <b>EUPHOL ACETATE</b>                  |                        |          |
| 10.0E-9                                |                        | 104.64   |
| 100.0E-9                               |                        | 143.44   |
| 1.0E-6                                 |                        | 90.89    |
| 10.0E-6                                |                        | 109.39   |
| <b>EUPHORBIASTEROID</b>                |                        |          |
| 10.0E-9                                |                        | 134.63   |
| 100.0E-9                               |                        | 102.27   |
| 1.0E-6                                 |                        | 95.48    |
| 10.0E-6                                |                        | 103.04   |
| <b>EVANS BLUE</b>                      |                        |          |
| 10.0E-9                                |                        | 101.35   |
| 100.0E-9                               |                        | 81.99    |
| 1.0E-6                                 |                        | 84.60    |
| 10.0E-6                                |                        | 101.64   |
| <b>EVERNIC ACID</b>                    |                        |          |
| 10.0E-9                                |                        | 100.67   |
| 100.0E-9                               |                        | 116.86   |
| 1.0E-6                                 |                        | 114.98   |
| 10.0E-6                                |                        | 80.66    |
| <b>EVOXINE</b>                         |                        |          |
| 10.0E-9                                |                        | 129.71   |
| 100.0E-9                               |                        | 80.71    |
| 1.0E-6                                 |                        | 132.76   |
| 10.0E-6                                |                        | 90.79    |
| <b>EXALAMIDE</b>                       |                        |          |
| 10.0E-9                                |                        | 96.18    |
| 100.0E-9                               |                        | 94.02    |
| 1.0E-6                                 |                        | 90.39    |
| 10.0E-6                                |                        | 73.08    |
| <b>EXEMESTANE</b>                      |                        |          |
| 10.0E-9                                |                        | 93.00    |
| 100.0E-9                               |                        | 111.84   |
| 1.0E-6                                 |                        | 139.88   |
| 10.0E-6                                |                        | 100.73   |
| <b>EZETIMIBE</b>                       |                        |          |
| 10.0E-9                                |                        | 112.01   |
| 100.0E-9                               |                        | 98.43    |
| 1.0E-6                                 |                        | 96.68    |
| 10.0E-6                                |                        | 81.90    |
| <b>FAMCICLOVIR</b>                     |                        |          |
| 10.0E-9                                |                        | 80.14    |
| 100.0E-9                               |                        | 109.98   |
| 1.0E-6                                 |                        | 151.52   |
| 10.0E-6                                |                        | 96.57    |
| <b>FAMOTIDINE</b>                      |                        |          |
| 10.0E-9                                |                        | 89.23    |
| 100.0E-9                               |                        | 99.55    |
| 1.0E-6                                 |                        | 99.47    |
| 10.0E-6                                |                        | 104.74   |
| <b>FAMPRIDINE</b>                      |                        |          |
| 10.0E-9                                |                        | 99.47    |
| 100.0E-9                               |                        | 95.90    |
| 1.0E-6                                 |                        | 96.42    |
| 10.0E-6                                |                        | 86.29    |
| <b>FAMPROFAZONE</b>                    |                        |          |
| 10.0E-9                                |                        | 126.15   |
| 100.0E-9                               |                        | 120.93   |
| 1.0E-6                                 |                        | 114.15   |
| 10.0E-6                                |                        | 116.26   |
| <b>FARNESOL</b>                        |                        |          |
| 10.0E-9                                |                        | 93.93    |
| 100.0E-9                               |                        | 105.76   |
| 1.0E-6                                 |                        | 121.58   |
| 10.0E-6                                |                        | 89.01    |
| <b>FEBUXOSTAT</b>                      |                        |          |
| 10.0E-9                                |                        | 99.15    |
| 100.0E-9                               |                        | 149.38   |
| 1.0E-6                                 |                        | 112.35   |
| 10.0E-6                                |                        | 101.43   |
| <b>FENBENDAZOLE</b>                    |                        |          |
| 10.0E-9                                |                        | 124.33   |
| 100.0E-9                               |                        | 128.87   |
| 1.0E-6                                 |                        | 89.15    |
| 10.0E-6                                |                        | 50.79    |
| <b>FENBUFEN</b>                        |                        |          |
| 10.0E-9                                |                        | 54.73    |
| 100.0E-9                               |                        | 100.63   |
| 1.0E-6                                 |                        | 92.03    |
| 10.0E-6                                |                        | 120.35   |
| <b>FENBUTYRAMIDE</b>                   |                        |          |
| 10.0E-9                                |                        | 112.39   |
| 100.0E-9                               |                        | 66.98    |
| 1.0E-6                                 |                        | 140.50   |
| 10.0E-6                                |                        | 133.84   |

| Compounds and Final Concentrations (M) | Average of % Viability | Hits (✓) |
|----------------------------------------|------------------------|----------|
| <b>FENDLINE HYDROCHLORIDE</b>          |                        |          |
| 10.0E-9                                |                        | 96.35    |
| 100.0E-9                               |                        | 118.94   |
| 1.0E-6                                 |                        | 100.90   |
| 10.0E-6                                |                        | 41.99    |
| <b>FENOFIBRATE</b>                     |                        |          |
| 10.0E-9                                |                        | 78.05    |
| 100.0E-9                               |                        | 105.40   |
| 1.0E-6                                 |                        | 89.95    |
| 10.0E-6                                |                        | 109.68   |
| <b>FENOPROFEN</b>                      |                        |          |
| 10.0E-9                                |                        | 118.15   |
| 100.0E-9                               |                        | 124.75   |
| 1.0E-6                                 |                        | 129.69   |
| 10.0E-6                                |                        | 109.65   |
| <b>FENOTEROL HYDROBROMIDE</b>          |                        |          |
| 10.0E-9                                |                        | 114.45   |
| 100.0E-9                               |                        | 114.82   |
| 1.0E-6                                 |                        | 108.85   |
| 10.0E-6                                |                        | 129.39   |
| <b>FENRETINIDE</b>                     |                        |          |
| 10.0E-9                                |                        | 99.26    |
| 100.0E-9                               |                        | 108.81   |
| 1.0E-6                                 |                        | 103.15   |
| 10.0E-6                                |                        | 102.47   |
| <b>FENSPIRIDE HYDROCHLORIDE</b>        |                        |          |
| 10.0E-9                                |                        | 62.81    |
| 100.0E-9                               |                        | 81.63    |
| 1.0E-6                                 |                        | 102.35   |
| 10.0E-6                                |                        | 98.33    |
| <b>FERULIC ACID</b>                    |                        |          |
| 10.0E-9                                |                        | 63.98    |
| 100.0E-9                               |                        | 110.47   |
| 1.0E-6                                 |                        | 90.35    |
| 10.0E-6                                |                        | 109.59   |
| <b>FEXOFENADINE HYDROCHLORIDE</b>      |                        |          |
| 10.0E-9                                |                        | 110.61   |
| 100.0E-9                               |                        | 100.35   |
| 1.0E-6                                 |                        | 85.13    |
| 10.0E-6                                |                        | 94.36    |
| <b>FINASTERIDE</b>                     |                        |          |
| 10.0E-9                                |                        | 90.42    |
| 100.0E-9                               |                        | 101.21   |
| 1.0E-6                                 |                        | 56.61    |
| 10.0E-6                                |                        | 112.74   |
| <b>FIPEXIDE HYDROCHLORIDE</b>          |                        |          |
| 10.0E-9                                |                        | 115.57   |
| 100.0E-9                               |                        | 100.22   |
| 1.0E-6                                 |                        | 137.84   |
| 10.0E-6                                |                        | 110.08   |
| <b>FIPRONIL</b>                        |                        |          |
| 10.0E-9                                |                        | 79.71    |
| 100.0E-9                               |                        | 87.67    |
| 1.0E-6                                 |                        | 88.13    |
| 10.0E-6                                |                        | 111.33   |
| <b>FIROCOXIB</b>                       |                        |          |
| 10.0E-9                                |                        | 109.75   |
| 100.0E-9                               |                        | 93.73    |
| 1.0E-6                                 |                        | 92.35    |
| 10.0E-6                                |                        | 118.88   |
| <b>FISETIN</b>                         |                        |          |
| 10.0E-9                                |                        | 133.99   |
| 100.0E-9                               |                        | 144.61   |
| 1.0E-6                                 |                        | 149.86   |
| 10.0E-6                                |                        | 118.92   |
| <b>FISSINOLIDE</b>                     |                        |          |
| 10.0E-9                                |                        | 122.91   |
| 100.0E-9                               |                        | 110.58   |
| 1.0E-6                                 |                        | 115.99   |
| 10.0E-6                                |                        | 99.40    |
| <b>FLOPROPIONE</b>                     |                        |          |
| 10.0E-9                                |                        | 119.71   |
| 100.0E-9                               |                        | 91.51    |
| 1.0E-6                                 |                        | 94.67    |
| 10.0E-6                                |                        | 84.71    |
| <b>FLORFENICOL</b>                     |                        |          |
| 10.0E-9                                |                        | 70.54    |
| 100.0E-9                               |                        | 151.71   |
| 1.0E-6                                 |                        | 108.61   |
| 10.0E-6                                |                        | 106.84   |
| <b>FLOXURIDINE</b>                     |                        |          |
| 10.0E-9                                |                        | 103.65   |
| 100.0E-9                               |                        | 128.24   |
| 1.0E-6                                 |                        | 118.10   |
| 10.0E-6                                |                        | 117.98   |

| Compounds and Final Concentrations (M) | Average of % Viability | Hits (✓) |
|----------------------------------------|------------------------|----------|
| <b>FLUCONAZOLE</b>                     |                        |          |
| 10.0E-9                                |                        | 111.19   |
| 100.0E-9                               |                        | 112.98   |
| 1.0E-6                                 |                        | 121.82   |
| 10.0E-6                                |                        | 101.43   |
| <b>FLUCYTOSINE</b>                     |                        |          |
| 10.0E-9                                |                        | 91.70    |
| 100.0E-9                               |                        | 94.32    |
| 1.0E-6                                 |                        | 99.94    |
| 10.0E-6                                |                        | 120.74   |
| <b>FLUDARABINE PHOSPHATE</b>           |                        |          |
| 10.0E-9                                |                        | 120.34   |
| 100.0E-9                               |                        | 81.41    |
| 1.0E-6                                 |                        | 72.00    |
| 10.0E-6                                |                        | 64.60    |
| <b>FLUDROCORTISONE ACETATE</b>         |                        |          |
| 10.0E-9                                |                        | 113.86   |
| 100.0E-9                               |                        | 119.89   |
| 1.0E-6                                 |                        | 99.85    |
| 10.0E-6                                |                        | 110.09   |
| <b>FLUFENAMIC ACID</b>                 |                        |          |
| 10.0E-9                                |                        | 117.94   |
| 100.0E-9                               |                        | 83.93    |
| 1.0E-6                                 |                        | 103.95   |
| 10.0E-6                                |                        | 111.74   |
| <b>FLUMEQUINE</b>                      |                        |          |
| 10.0E-9                                |                        | 90.21    |
| 100.0E-9                               |                        | 107.85   |
| 1.0E-6                                 |                        | 75.50    |
| 10.0E-6                                |                        | 146.36   |
| <b>FLUMETHASONE</b>                    |                        |          |
| 10.0E-9                                |                        | 90.64    |
| 100.0E-9                               |                        | 93.51    |
| 1.0E-6                                 |                        | 79.41    |
| 10.0E-6                                |                        | 78.72    |
| <b>FLUMETHAZONE PIVALATE</b>           |                        |          |
| 10.0E-9                                |                        | 86.87    |
| 100.0E-9                               |                        | 117.95   |
| 1.0E-6                                 |                        | 92.28    |
| 10.0E-6                                |                        | 87.83    |
| <b>FLUNARIZINE HYDROCHLORIDE</b>       |                        |          |
| 10.0E-9                                |                        | 81.65    |
| 100.0E-9                               |                        | 96.20    |
| 1.0E-6                                 |                        | 96.24    |
| 10.0E-6                                |                        | 100.61   |
| <b>FLUNISOLIDE</b>                     |                        |          |
| 10.0E-9                                |                        | 128.76   |
| 100.0E-9                               |                        | 130.25   |
| 1.0E-6                                 |                        | 76.88    |
| 10.0E-6                                |                        | 110.71   |
| <b>FLUNIXIN MEGLUMINE</b>              |                        |          |
| 10.0E-9                                |                        | 120.41   |
| 100.0E-9                               |                        | 124.09   |
| 1.0E-6                                 |                        | 90.51    |
| 10.0E-6                                |                        | 127.63   |
| <b>FLUOCINOLONE ACETONIDE</b>          |                        |          |
| 10.0E-9                                |                        | 102.16   |
| 100.0E-9                               |                        | 132.96   |
| 1.0E-6                                 |                        | 82.30    |
| 10.0E-6                                |                        | 141.33   |
| <b>FLUOCINONIDE</b>                    |                        |          |
| 10.0E-9                                |                        | 86.83    |
| 100.0E-9                               |                        | 113.24   |
| 1.0E-6                                 |                        | 101.96   |
| 10.0E-6                                |                        | 114.74   |
| <b>FLUORESC EIN</b>                    |                        |          |
| 10.0E-9                                |                        | 137.60   |
| 100.0E-9                               |                        | 134.81   |
| 1.0E-6                                 |                        | 89.95    |
| 10.0E-6                                |                        | 82.84    |
| <b>FLUOROMETHOLONE</b>                 |                        |          |
| 10.0E-9                                |                        | 114.32   |
| 100.0E-9                               |                        | 140.80   |
| 1.0E-6                                 |                        | 95.80    |
| 10.0E-6                                |                        | 122.36   |
| <b>FLUOROURACIL</b>                    |                        |          |
| 10.0E-9                                |                        | 96.59    |
| 100.0E-9                               |                        | 125.94   |
| 1.0E-6                                 |                        | 85.87    |
| 10.0E-6                                |                        | 82.99    |
| <b>FLUOXETINE</b>                      |                        |          |
| 10.0E-9                                |                        | 86.72    |
| 100.0E-9                               |                        | 102.05   |
| 1.0E-6                                 |                        | 107.70   |
| 10.0E-6                                |                        | 68.60    |



| Compounds and Final Concentrations (M) | Average of % Viability | Hits (✓) |
|----------------------------------------|------------------------|----------|
| <b>FLUPHENAZINE HYDROCHLORIDE</b>      |                        |          |
| 10.0E-9                                | ✓                      | 97.33    |
| 100.0E-9                               | ✓                      | 109.26   |
| 1.0E-6                                 | ✓                      | 70.51    |
| 10.0E-6                                | ✓                      | 57.18    |
| <b>FLURANDRENOLIDE</b>                 |                        |          |
| 10.0E-9                                | ✓                      | 90.97    |
| 100.0E-9                               | ✓                      | 91.64    |
| 1.0E-6                                 | ✓                      | 105.02   |
| 10.0E-6                                | ✓                      | 79.75    |
| <b>FLURBIPROFEN</b>                    |                        |          |
| 10.0E-9                                | ✓                      | 115.17   |
| 100.0E-9                               | ✓                      | 86.47    |
| 1.0E-6                                 | ✓                      | 98.75    |
| 10.0E-6                                | ✓                      | 108.55   |
| <b>FLUROTHYL</b>                       |                        |          |
| 10.0E-9                                | ✓                      | 109.11   |
| 100.0E-9                               | ✓                      | 115.23   |
| 1.0E-6                                 | ✓                      | 103.92   |
| 10.0E-6                                | ✓                      | 101.01   |
| <b>FLUTAMIDE</b>                       |                        |          |
| 10.0E-9                                | ✓                      | 88.88    |
| 100.0E-9                               | ✓                      | 82.85    |
| 1.0E-6                                 | ✓                      | 86.41    |
| 10.0E-6                                | ✓                      | 92.03    |
| <b>FLUVASTATIN</b>                     |                        |          |
| 10.0E-9                                | ✓                      | 99.51    |
| 100.0E-9                               | ✓                      | 118.42   |
| 1.0E-6                                 | ✓                      | 92.80    |
| 10.0E-6                                | ✓                      | 82.37    |
| <b>FOLIC ACID</b>                      |                        |          |
| 10.0E-9                                | ✓                      | 88.88    |
| 100.0E-9                               | ✓                      | 108.48   |
| 1.0E-6                                 | ✓                      | 74.61    |
| 10.0E-6                                | ✓                      | 121.05   |
| <b>FOMEPIZOLE HYDROCHLORIDE</b>        |                        |          |
| 10.0E-9                                | ✓                      | 95.57    |
| 100.0E-9                               | ✓                      | 103.96   |
| 1.0E-6                                 | ✓                      | 102.94   |
| 10.0E-6                                | ✓                      | 102.43   |
| <b>FORMESTANE</b>                      |                        |          |
| 10.0E-9                                | ✓                      | 91.74    |
| 100.0E-9                               | ✓                      | 116.74   |
| 1.0E-6                                 | ✓                      | 108.08   |
| 10.0E-6                                | ✓                      | 120.68   |
| <b>FORMONONETIN</b>                    |                        |          |
| 10.0E-9                                | ✓                      | 78.40    |
| 100.0E-9                               | ✓                      | 105.58   |
| 1.0E-6                                 | ✓                      | 98.25    |
| 10.0E-6                                | ✓                      | 80.15    |
| <b>FOSCARNET SODIUM</b>                |                        |          |
| 10.0E-9                                | ✓                      | 93.61    |
| 100.0E-9                               | ✓                      | 113.97   |
| 1.0E-6                                 | ✓                      | 110.17   |
| 10.0E-6                                | ✓                      | 111.69   |
| <b>FOSFOMYCIN CALCIUM</b>              |                        |          |
| 10.0E-9                                | ✓                      | 86.00    |
| 100.0E-9                               | ✓                      | 93.13    |
| 1.0E-6                                 | ✓                      | 105.50   |
| 10.0E-6                                | ✓                      | 88.30    |
| <b>FOSFOSAL</b>                        |                        |          |
| 10.0E-9                                | ✓                      | 90.77    |
| 100.0E-9                               | ✓                      | 101.80   |
| 1.0E-6                                 | ✓                      | 92.84    |
| 10.0E-6                                | ✓                      | 98.26    |
| <b>FRIEDELIN</b>                       |                        |          |
| 10.0E-9                                | ✓                      | 138.28   |
| 100.0E-9                               | ✓                      | 83.47    |
| 1.0E-6                                 | ✓                      | 89.45    |
| 10.0E-6                                | ✓                      | 84.49    |
| <b>FTAXILIDE</b>                       |                        |          |
| 10.0E-9                                | ✓                      | 102.82   |
| 100.0E-9                               | ✓                      | 124.46   |
| 1.0E-6                                 | ✓                      | 94.81    |
| 10.0E-6                                | ✓                      | 77.95    |
| <b>FUCOSTANOL</b>                      |                        |          |
| 10.0E-9                                | ✓                      | 122.21   |
| 100.0E-9                               | ✓                      | 106.53   |
| 1.0E-6                                 | ✓                      | 106.16   |
| 10.0E-6                                | ✓                      | 74.88    |
| <b>FUMARPROTOCETRARIC ACID</b>         |                        |          |
| 10.0E-9                                | ✓                      | 79.35    |
| 100.0E-9                               | ✓                      | 81.60    |
| 1.0E-6                                 | ✓                      | 99.96    |
| 10.0E-6                                | ✓                      | 101.85   |

| Compounds and Final Concentrations (M) | Average of % Viability | Hits (✓) |
|----------------------------------------|------------------------|----------|
| <b>FUMAZENIL</b>                       |                        |          |
| 10.0E-9                                |                        | 126.37   |
| 100.0E-9                               |                        | 96.41    |
| 1.0E-6                                 |                        | 68.12    |
| 10.0E-6                                |                        | 83.87    |
| <b>FURALTADONE</b>                     |                        |          |
| 10.0E-9                                |                        | 120.29   |
| 100.0E-9                               |                        | 115.57   |
| 1.0E-6                                 |                        | 95.23    |
| 10.0E-6                                |                        | 109.00   |
| <b>FURAZOLIDONE</b>                    |                        |          |
| 10.0E-9                                |                        | 265.04   |
| 100.0E-9                               |                        | 114.87   |
| 1.0E-6                                 |                        | 117.42   |
| 10.0E-6                                |                        | 99.38    |
| <b>FUROSEMIDE</b>                      |                        |          |
| 10.0E-9                                |                        | 121.79   |
| 100.0E-9                               |                        | 113.26   |
| 1.0E-6                                 |                        | 92.91    |
| 10.0E-6                                |                        | 122.10   |
| <b>FUSARIC ACID</b>                    |                        |          |
| 10.0E-9                                |                        | 100.92   |
| 100.0E-9                               |                        | 133.48   |
| 1.0E-6                                 |                        | 120.59   |
| 10.0E-6                                |                        | 86.49    |
| <b>FUSIDIC ACID</b>                    |                        |          |
| 10.0E-9                                |                        | 75.73    |
| 100.0E-9                               |                        | 112.97   |
| 1.0E-6                                 |                        | 102.99   |
| 10.0E-6                                |                        | 104.87   |
| <b>GABAPENTIN</b>                      |                        |          |
| 10.0E-9                                |                        | 97.18    |
| 100.0E-9                               |                        | 134.55   |
| 1.0E-6                                 |                        | 108.45   |
| 10.0E-6                                |                        | 147.27   |
| <b>GALANGIN</b>                        |                        |          |
| 10.0E-9                                |                        | 79.43    |
| 100.0E-9                               |                        | 102.30   |
| 1.0E-6                                 |                        | 93.97    |
| 10.0E-6                                |                        | 89.79    |
| <b>GALANTHAMINE HYDROBROMIDE</b>       |                        |          |
| 10.0E-9                                |                        | 88.88    |
| 100.0E-9                               |                        | 130.43   |
| 1.0E-6                                 |                        | 123.82   |
| 10.0E-6                                |                        | 125.19   |
| <b>GALLAMINE TRIETHIODIDE</b>          |                        |          |
| 10.0E-9                                |                        | 106.28   |
| 100.0E-9                               |                        | 127.57   |
| 1.0E-6                                 |                        | 87.63    |
| 10.0E-6                                |                        | 103.84   |
| <b>GALLIC ACID</b>                     |                        |          |
| 10.0E-9                                |                        | 84.32    |
| 100.0E-9                               |                        | 133.61   |
| 1.0E-6                                 |                        | 91.73    |
| 10.0E-6                                |                        | 142.07   |
| <b>GAMBOGIC ACID</b>                   |                        |          |
| 10.0E-9                                |                        | 122.71   |
| 100.0E-9                               |                        | 87.96    |
| 1.0E-6                                 |                        | 12.42    |
| 10.0E-6                                |                        | -1.71    |
| <b>gamma-AMINOBUTYRIC ACID</b>         |                        |          |
| 10.0E-9                                |                        | 120.03   |
| 100.0E-9                               |                        | 103.16   |
| 1.0E-6                                 |                        | 102.72   |
| 10.0E-6                                |                        | 113.49   |
| <b>GANGALEOIDIN</b>                    |                        |          |
| 10.0E-9                                |                        | 126.64   |
| 100.0E-9                               |                        | 90.71    |
| 1.0E-6                                 |                        | 85.93    |
| 10.0E-6                                |                        | 107.43   |
| <b>GARCINOLIC ACID</b>                 |                        |          |
| 10.0E-9                                |                        | 113.06   |
| 100.0E-9                               |                        | 115.07   |
| 1.0E-6                                 |                        | 114.03   |
| 10.0E-6                                |                        | 114.06   |
| <b>GARLICIN</b>                        |                        |          |
| 10.0E-9                                |                        | 103.06   |
| 100.0E-9                               |                        | 132.50   |
| 1.0E-6                                 |                        | 105.05   |
| 10.0E-6                                |                        | 91.62    |
| <b>GATIFLOXACIN</b>                    |                        |          |
| 10.0E-9                                |                        | 123.02   |
| 100.0E-9                               |                        | 110.13   |
| 1.0E-6                                 |                        | 104.18   |
| 10.0E-6                                |                        | 115.64   |

| Compounds and Final Concentrations (M) | Average of % Viability | Hits (✓) |
|----------------------------------------|------------------------|----------|
| <b>GEDUNIN</b>                         |                        |          |
| 10.0E-9                                |                        | 103.46   |
| 100.0E-9                               |                        | 135.55   |
| 1.0E-6                                 |                        | 125.59   |
| 10.0E-6                                |                        | 58.42    |
| <b>GEDUNOL</b>                         |                        |          |
| 10.0E-9                                |                        | 98.63    |
| 100.0E-9                               |                        | 102.62   |
| 1.0E-6                                 |                        | 107.98   |
| 10.0E-6                                |                        | 83.86    |
| <b>GEMFIBROZIL</b>                     |                        |          |
| 10.0E-9                                |                        | 78.94    |
| 100.0E-9                               |                        | 82.63    |
| 1.0E-6                                 |                        | 99.80    |
| 10.0E-6                                |                        | 112.42   |
| <b>GEMIFLOXACIN MESYLATE</b>           |                        |          |
| 10.0E-9                                |                        | 109.65   |
| 100.0E-9                               |                        | 105.05   |
| 1.0E-6                                 |                        | 127.82   |
| 10.0E-6                                |                        | 92.08    |
| <b>GENETICIN</b>                       |                        |          |
| 10.0E-9                                |                        | 100.19   |
| 100.0E-9                               |                        | 86.02    |
| 1.0E-6                                 |                        | 103.97   |
| 10.0E-6                                |                        | 85.42    |
| <b>GENISTEIN</b>                       |                        |          |
| 10.0E-9                                |                        | 113.22   |
| 100.0E-9                               |                        | 146.92   |
| 1.0E-6                                 |                        | 106.23   |
| 10.0E-6                                |                        | 107.38   |
| <b>GENTAMICIN SULFATE</b>              |                        |          |
| 10.0E-9                                |                        | 135.77   |
| 100.0E-9                               |                        | 156.18   |
| 1.0E-6                                 |                        | 106.96   |
| 10.0E-6                                |                        | 103.90   |
| <b>GENTIAN VIOLET</b>                  |                        |          |
| 10.0E-9                                |                        | 102.37   |
| 100.0E-9                               |                        | 126.80   |
| 1.0E-6                                 |                        | 86.31    |
| 10.0E-6                                |                        | 41.11    |
| <b>GIBBERELIC ACID</b>                 |                        |          |
| 10.0E-9                                |                        | 132.41   |
| 100.0E-9                               |                        | 101.55   |
| 1.0E-6                                 |                        | 99.02    |
| 10.0E-6                                |                        | 116.18   |
| <b>GINKGOLIDE A</b>                    |                        |          |
| 10.0E-9                                |                        | 119.84   |
| 100.0E-9                               |                        | 110.27   |
| 1.0E-6                                 |                        | 134.65   |
| 10.0E-6                                |                        | 140.02   |
| <b>GITOXIGENIN DIACETATE</b>           |                        |          |
| 10.0E-9                                |                        | 78.42    |
| 100.0E-9                               |                        | 78.48    |
| 1.0E-6                                 |                        | 75.42    |
| 10.0E-6                                |                        | 92.06    |
| <b>GITOXIN</b>                         |                        |          |
| 10.0E-9                                |                        | 129.97   |
| 100.0E-9                               |                        | 112.78   |
| 1.0E-6                                 |                        | 94.44    |
| 10.0E-6                                |                        | 81.88    |
| <b>GLAFENINE</b>                       |                        |          |
| 10.0E-9                                |                        | 113.34   |
| 100.0E-9                               |                        | 109.12   |
| 1.0E-6                                 |                        | 104.93   |
| 10.0E-6                                |                        | 66.94    |
| <b>GLICLAZIDE</b>                      |                        |          |
| 10.0E-9                                |                        | 109.56   |
| 100.0E-9                               |                        | 127.59   |
| 1.0E-6                                 |                        | 81.02    |
| 10.0E-6                                |                        | 47.73    |
| <b>GLIPIZIDE</b>                       |                        |          |
| 10.0E-9                                |                        | 96.21    |
| 100.0E-9                               |                        | 108.26   |
| 1.0E-6                                 |                        | 136.35   |
| 10.0E-6                                |                        | 111.13   |
| <b>GLUCITOL-4-GUCOPYANOSIDE</b>        |                        |          |
| 10.0E-9                                |                        | 146.00   |
| 100.0E-9                               |                        | 101.25   |
| 1.0E-6                                 |                        | 128.24   |
| 10.0E-6                                |                        | 83.66    |
| <b>GLUCONOLACTONE</b>                  |                        |          |
| 10.0E-9                                |                        | 115.62   |
| 100.0E-9                               |                        | 129.99   |
| 1.0E-6                                 |                        | 110.22   |
| 10.0E-6                                |                        | 105.60   |

| Compounds and Final Concentrations (M)  | Average of % Viability | Hits (✓) |
|-----------------------------------------|------------------------|----------|
| <b>GLUCOSAMINE HYDROCHLORIDE</b>        |                        |          |
| 10.0E-9                                 |                        | 87.15    |
| 100.0E-9                                |                        | 118.16   |
| 1.0E-6                                  |                        | 96.19    |
| 10.0E-6                                 |                        | 80.60    |
| <b>GLUCOSAMINIC ACID</b>                |                        |          |
| 10.0E-9                                 |                        | 148.92   |
| 100.0E-9                                |                        | 100.30   |
| 1.0E-6                                  |                        | 94.65    |
| 10.0E-6                                 |                        | 70.58    |
| <b>GLUTAMINE (D)</b>                    |                        |          |
| 10.0E-9                                 |                        | 105.45   |
| 100.0E-9                                |                        | 114.06   |
| 1.0E-6                                  |                        | 130.76   |
| 10.0E-6                                 |                        | 111.33   |
| <b>GLUTAMINE (L)</b>                    |                        |          |
| 10.0E-9                                 |                        | 110.10   |
| 100.0E-9                                |                        | 129.94   |
| 1.0E-6                                  |                        | 90.82    |
| 10.0E-6                                 |                        | 91.49    |
| <b>GLUTATHIONE</b>                      |                        |          |
| 10.0E-9                                 |                        | 76.46    |
| 100.0E-9                                |                        | 107.32   |
| 1.0E-6                                  |                        | 94.71    |
| 10.0E-6                                 |                        | 78.62    |
| <b>GLYBURIDE</b>                        |                        |          |
| 10.0E-9                                 |                        | 88.88    |
| 100.0E-9                                |                        | 70.01    |
| 1.0E-6                                  |                        | 79.85    |
| 10.0E-6                                 |                        | 81.12    |
| <b>GLYCOCHOLIC ACID</b>                 |                        |          |
| 10.0E-9                                 |                        | 84.32    |
| 100.0E-9                                |                        | 123.85   |
| 1.0E-6                                  |                        | 111.26   |
| 10.0E-6                                 |                        | 96.45    |
| <b>GLYCOPYRROLATE</b>                   |                        |          |
| 10.0E-9                                 |                        | 89.03    |
| 100.0E-9                                |                        | 94.62    |
| 1.0E-6                                  |                        | 81.08    |
| 10.0E-6                                 |                        | 75.74    |
| <b>GLYCYRRHIZIC ACID, AMMONIUM SALT</b> |                        |          |
| 10.0E-9                                 |                        | 66.88    |
| 100.0E-9                                |                        | 91.64    |
| 1.0E-6                                  |                        | 91.27    |
| 10.0E-6                                 |                        | 80.94    |
| <b>GOSSYPETIN</b>                       |                        |          |
| 10.0E-9                                 |                        | 93.91    |
| 100.0E-9                                |                        | 124.54   |
| 1.0E-6                                  |                        | 92.75    |
| 10.0E-6                                 |                        | 88.92    |
| <b>GOSSYPIN</b>                         |                        |          |
| 10.0E-9                                 |                        | 115.21   |
| 100.0E-9                                |                        | 95.20    |
| 1.0E-6                                  |                        | 97.05    |
| 10.0E-6                                 |                        | 73.12    |
| <b>GOSSYPOL</b>                         |                        |          |
| 10.0E-9                                 |                        | 119.00   |
| 100.0E-9                                |                        | 93.87    |
| 1.0E-6                                  |                        | 112.41   |
| 10.0E-6                                 |                        | 80.36    |
| <b>GRAMICIDIN</b>                       |                        |          |
| 10.0E-9                                 |                        | 101.84   |
| 100.0E-9                                |                        | 92.40    |
| 1.0E-6                                  |                        | 81.71    |
| 10.0E-6                                 |                        | 56.54    |
| <b>GRAMINE</b>                          |                        |          |
| 10.0E-9                                 |                        | 147.89   |
| 100.0E-9                                |                        | 93.01    |
| 1.0E-6                                  |                        | 101.88   |
| 10.0E-6                                 |                        | 104.30   |
| <b>RISEOFULVIN</b>                      |                        |          |
| 10.0E-9                                 |                        | 92.63    |
| 100.0E-9                                |                        | 100.77   |
| 1.0E-6                                  |                        | 83.82    |
| 10.0E-6                                 |                        | 89.03    |
| <b>GUAIFENESIN</b>                      |                        |          |
| 10.0E-9                                 |                        | 101.91   |
| 100.0E-9                                |                        | 153.09   |
| 1.0E-6                                  |                        | 81.23    |
| 10.0E-6                                 |                        | 93.96    |
| <b>GUAIOL(-)</b>                        |                        |          |
| 10.0E-9                                 |                        | 126.37   |
| 100.0E-9                                |                        | 103.98   |
| 1.0E-6                                  |                        | 127.13   |
| 10.0E-6                                 |                        | 133.82   |

| Compounds and Final Concentrations (M) | Average of % Viability | Hits (✓) |
|----------------------------------------|------------------------|----------|
| <b>GUANABENZ ACETATE</b>               |                        |          |
| 10.0E-9                                |                        | 125.17   |
| 100.0E-9                               |                        | 129.73   |
| 1.0E-6                                 |                        | 80.43    |
| 10.0E-6                                |                        | 96.16    |
| <b>GUANETHIDINE SULFATE</b>            |                        |          |
| 10.0E-9                                |                        | 147.08   |
| 100.0E-9                               |                        | 115.24   |
| 1.0E-6                                 |                        | 90.80    |
| 10.0E-6                                |                        | 137.33   |
| <b>GUANFACINE</b>                      |                        |          |
| 10.0E-9                                |                        | 85.69    |
| 100.0E-9                               |                        | 98.10    |
| 1.0E-6                                 |                        | 99.59    |
| 10.0E-6                                |                        | 112.20   |
| <b>GYROMITRIN</b>                      |                        |          |
| 10.0E-9                                |                        | 97.94    |
| 100.0E-9                               |                        | 124.34   |
| 1.0E-6                                 |                        | 139.46   |
| 10.0E-6                                |                        | 94.28    |
| <b>HAEMATOMMIC ACID</b>                |                        |          |
| 10.0E-9                                |                        | 131.36   |
| 100.0E-9                               |                        | 80.02    |
| 1.0E-6                                 |                        | 55.86    |
| 10.0E-6                                |                        | 77.56    |
| <b>HAEMATOMMIC ACID, ETHYL ESTER</b>   |                        |          |
| 10.0E-9                                |                        | 101.56   |
| 100.0E-9                               |                        | 101.29   |
| 1.0E-6                                 |                        | 96.56    |
| 10.0E-6                                |                        | 79.90    |
| <b>HAEMATOPORPHYRIN</b>                |                        |          |
| 10.0E-9                                |                        | 111.95   |
| 100.0E-9                               |                        | 97.48    |
| 1.0E-6                                 |                        | 115.16   |
| 10.0E-6                                |                        | 95.98    |
| <b>HAEMATYOXYLIN</b>                   |                        |          |
| 10.0E-9                                |                        | 107.37   |
| 100.0E-9                               |                        | 96.34    |
| 1.0E-6                                 |                        | 82.45    |
| 10.0E-6                                |                        | 92.71    |
| <b>HAEMATYOXYLIN PENTAACETATE</b>      |                        |          |
| 10.0E-9                                |                        | 118.58   |
| 100.0E-9                               |                        | 104.96   |
| 1.0E-6                                 |                        | 79.65    |
| 10.0E-6                                |                        | 120.64   |
| <b>HALAZONE</b>                        |                        |          |
| 10.0E-9                                |                        | 83.80    |
| 100.0E-9                               |                        | 113.85   |
| 1.0E-6                                 |                        | 109.79   |
| 10.0E-6                                |                        | 108.35   |
| <b>HALCINONIDE</b>                     |                        |          |
| 10.0E-9                                |                        | 112.40   |
| 100.0E-9                               |                        | 73.71    |
| 1.0E-6                                 |                        | 107.79   |
| 10.0E-6                                |                        | 81.18    |
| <b>HALOPERIDOL</b>                     |                        |          |
| 10.0E-9                                |                        | 114.35   |
| 100.0E-9                               |                        | 114.40   |
| 1.0E-6                                 |                        | 96.84    |
| 10.0E-6                                |                        | 102.03   |
| <b>HALOTHANE</b>                       |                        |          |
| 10.0E-9                                |                        | 88.04    |
| 100.0E-9                               |                        | 75.71    |
| 1.0E-6                                 |                        | 85.86    |
| 10.0E-6                                |                        | 97.92    |
| <b>HARMALINE</b>                       |                        |          |
| 10.0E-9                                |                        | 76.39    |
| 100.0E-9                               |                        | 96.73    |
| 1.0E-6                                 |                        | 98.63    |
| 10.0E-6                                |                        | 67.91    |
| <b>HARMALOL HYDROCHLORIDE</b>          |                        |          |
| 10.0E-9                                |                        | 111.32   |
| 100.0E-9                               |                        | 114.65   |
| 1.0E-6                                 |                        | 89.40    |
| 10.0E-6                                |                        | 91.59    |
| <b>HARMANE</b>                         |                        |          |
| 10.0E-9                                |                        | 103.44   |
| 100.0E-9                               |                        | 117.38   |
| 1.0E-6                                 |                        | 84.51    |
| 10.0E-6                                |                        | 110.77   |
| <b>HARMINE</b>                         |                        |          |
| 10.0E-9                                |                        | 104.49   |
| 100.0E-9                               |                        | 108.79   |
| 1.0E-6                                 |                        | 117.55   |
| 10.0E-6                                |                        | 42.11    |

| Compounds and Final Concentrations (M) | Average of % Viability | Hits (✓) |
|----------------------------------------|------------------------|----------|
| <b>HARMOL HYDROCHLORIDE</b>            |                        |          |
| 10.0E-9                                |                        | 111.21   |
| 100.0E-9                               |                        | 103.90   |
| 1.0E-6                                 |                        | 132.70   |
| 10.0E-6                                |                        | 106.58   |
| <b>HARPAGOSIDE</b>                     |                        |          |
| 10.0E-9                                |                        | 107.81   |
| 100.0E-9                               |                        | 88.83    |
| 1.0E-6                                 |                        | 123.94   |
| 10.0E-6                                |                        | 131.15   |
| <b>HECOGENIN</b>                       |                        |          |
| 10.0E-9                                |                        | 93.86    |
| 100.0E-9                               |                        | 94.30    |
| 1.0E-6                                 |                        | 64.78    |
| 10.0E-6                                |                        | 82.06    |
| <b>HECOGENIN ACETATE</b>               |                        |          |
| 10.0E-9                                |                        | 112.83   |
| 100.0E-9                               |                        | 86.32    |
| 1.0E-6                                 |                        | 103.92   |
| 10.0E-6                                |                        | 92.44    |
| <b>HEDERACOSIDE C</b>                  |                        |          |
| 10.0E-9                                |                        | 99.06    |
| 100.0E-9                               |                        | 95.82    |
| 1.0E-6                                 |                        | 121.00   |
| 10.0E-6                                |                        | 101.36   |
| <b>HEDERAGENIN</b>                     |                        |          |
| 10.0E-9                                |                        | 92.79    |
| 100.0E-9                               |                        | 84.39    |
| 1.0E-6                                 |                        | 116.93   |
| 10.0E-6                                |                        | 98.66    |
| <b>HELENINE</b>                        |                        |          |
| 10.0E-9                                |                        | 118.97   |
| 100.0E-9                               |                        | 91.51    |
| 1.0E-6                                 |                        | 69.98    |
| 10.0E-6                                |                        | 17.08    |
| <b>HELICIN</b>                         |                        |          |
| 10.0E-9                                |                        | 104.18   |
| 100.0E-9                               |                        | 106.71   |
| 1.0E-6                                 |                        | 107.24   |
| 10.0E-6                                |                        | 98.66    |
| <b>HEMATEIN</b>                        |                        |          |
| 10.0E-9                                |                        | 119.34   |
| 100.0E-9                               |                        | 121.84   |
| 1.0E-6                                 |                        | 70.26    |
| 10.0E-6                                |                        | 103.98   |
| <b>HEMICHOLINIUM BROMIDE</b>           |                        |          |
| 10.0E-9                                |                        | 134.04   |
| 100.0E-9                               |                        | 137.43   |
| 1.0E-6                                 |                        | 93.68    |
| 10.0E-6                                |                        | 70.35    |
| <b>HEPTAMINOL HYDROCHLORIDE</b>        |                        |          |
| 10.0E-9                                |                        | 117.85   |
| 100.0E-9                               |                        | 124.75   |
| 1.0E-6                                 |                        | 83.23    |
| 10.0E-6                                |                        | 118.38   |
| <b>HESPERETIN</b>                      |                        |          |
| 10.0E-9                                |                        | 102.50   |
| 100.0E-9                               |                        | 127.22   |
| 1.0E-6                                 |                        | 106.96   |
| 10.0E-6                                |                        | 115.12   |
| <b>HESPERIDIN</b>                      |                        |          |
| 10.0E-9                                |                        | 107.35   |
| 100.0E-9                               |                        | 115.64   |
| 1.0E-6                                 |                        | 116.80   |
| 10.0E-6                                |                        | 120.54   |
| <b>HETACILLIN POTASSIUM</b>            |                        |          |
| 10.0E-9                                |                        | 86.80    |
| 100.0E-9                               |                        | 122.21   |
| 1.0E-6                                 |                        | 77.85    |
| 10.0E-6                                |                        | 100.09   |
| <b>HETEROPEUCENIN, METHYL ETHER</b>    |                        |          |
| 10.0E-9                                |                        | 117.09   |
| 100.0E-9                               |                        | 140.42   |
| 1.0E-6                                 |                        | 91.08    |
| 10.0E-6                                |                        | 64.94    |
| <b>HEXACHLOROPHENE</b>                 |                        |          |
| 10.0E-9                                |                        | 108.29   |
| 100.0E-9                               |                        | 152.52   |
| 1.0E-6                                 |                        | 118.54   |
| 10.0E-6                                |                        | 98.80    |
| <b>HEXAMETHONIUM BROMIDE</b>           |                        |          |
| 10.0E-9                                |                        | 83.78    |
| 100.0E-9                               |                        | 88.54    |
| 1.0E-6                                 |                        | 94.64    |
| 10.0E-6                                |                        | 86.34    |

| Compounds and Final Concentrations (M) | Average of % Viability | Hits (✓) |
|----------------------------------------|------------------------|----------|
| <b>HEXAMETHYLQUERCETAGETIN</b>         |                        |          |
| 10.0E-9                                |                        | 107.70   |
| 100.0E-9                               |                        | 82.44    |
| 1.0E-6                                 |                        | 110.06   |
| 10.0E-6                                |                        | 90.73    |
| <b>HEXESTROL</b>                       |                        |          |
| 10.0E-9                                |                        | 132.36   |
| 100.0E-9                               |                        | 124.12   |
| 1.0E-6                                 |                        | 110.46   |
| 10.0E-6                                |                        | 73.19    |
| <b>HEXETIDINE</b>                      |                        |          |
| 10.0E-9                                |                        | 76.07    |
| 100.0E-9                               |                        | 97.08    |
| 1.0E-6                                 |                        | 92.04    |
| 10.0E-6                                |                        | 12.36    |
| <b>HEXYLRESORCINOL</b>                 |                        |          |
| 10.0E-9                                |                        | 92.44    |
| 100.0E-9                               |                        | 105.58   |
| 1.0E-6                                 |                        | 129.26   |
| 10.0E-6                                |                        | 115.58   |
| <b>HIERACIN</b>                        |                        |          |
| 10.0E-9                                |                        | 78.52    |
| 100.0E-9                               |                        | 95.95    |
| 1.0E-6                                 |                        | 105.14   |
| 10.0E-6                                |                        | 86.32    |
| <b>HISTAMINE DIHYDROCHLORIDE</b>       |                        |          |
| 10.0E-9                                |                        | 84.43    |
| 100.0E-9                               |                        | 110.07   |
| 1.0E-6                                 |                        | 131.04   |
| 10.0E-6                                |                        | 103.84   |
| <b>HOMATROPINE BROMIDE</b>             |                        |          |
| 10.0E-9                                |                        | 119.78   |
| 100.0E-9                               |                        | 113.30   |
| 1.0E-6                                 |                        | 106.30   |
| 10.0E-6                                |                        | 113.45   |
| <b>HOMATROPINE METHYLBROMIDE</b>       |                        |          |
| 10.0E-9                                |                        | 103.89   |
| 100.0E-9                               |                        | 140.62   |
| 1.0E-6                                 |                        | 102.30   |
| 10.0E-6                                |                        | 141.78   |
| <b>HOMIDIUM BROMIDE</b>                |                        |          |
| 10.0E-9                                |                        | 111.96   |
| 100.0E-9                               |                        | 132.35   |
| 1.0E-6                                 |                        | 73.70    |
| 10.0E-6                                |                        | 34.14    |
| <b>HOMOPTEROCARPIN</b>                 |                        |          |
| 10.0E-9                                |                        | 165.42   |
| 100.0E-9                               |                        | 113.53   |
| 1.0E-6                                 |                        | 122.75   |
| 10.0E-6                                |                        | 73.10    |
| <b>HOMOSALATE</b>                      |                        |          |
| 10.0E-9                                |                        | 68.99    |
| 100.0E-9                               |                        | 117.54   |
| 1.0E-6                                 |                        | 102.22   |
| 10.0E-6                                |                        | 115.86   |
| <b>HUMULENE (alpha)</b>                |                        |          |
| 10.0E-9                                |                        | 149.64   |
| 100.0E-9                               |                        | 119.35   |
| 1.0E-6                                 |                        | 73.95    |
| 10.0E-6                                |                        | 83.65    |
| <b>HUPERZINE A</b>                     |                        |          |
| 10.0E-9                                |                        | 121.34   |
| 100.0E-9                               |                        | 107.25   |
| 1.0E-6                                 |                        | 129.58   |
| 10.0E-6                                |                        | 104.84   |
| <b>HYCANTHONE</b>                      |                        |          |
| 10.0E-9                                |                        | 67.82    |
| 100.0E-9                               |                        | 79.19    |
| 1.0E-6                                 |                        | 79.14    |
| 10.0E-6                                |                        | 92.42    |
| <b>HYDRALAZINE HYDROCHLORIDE</b>       |                        |          |
| 10.0E-9                                |                        | 124.39   |
| 100.0E-9                               |                        | 135.12   |
| 1.0E-6                                 |                        | 124.25   |
| 10.0E-6                                |                        | 100.29   |
| <b>HYDRASTINE (1R, 9S)</b>             |                        |          |
| 10.0E-9                                |                        | 107.79   |
| 100.0E-9                               |                        | 85.38    |
| 1.0E-6                                 |                        | 101.68   |
| 10.0E-6                                |                        | 95.19    |
| <b>HYDRASTININE HYDROCHLORIDE</b>      |                        |          |
| 10.0E-9                                |                        | 98.08    |
| 100.0E-9                               |                        | 95.57    |
| 1.0E-6                                 |                        | 126.46   |
| 10.0E-6                                |                        | 103.31   |

| Compounds and Final Concentrations (M)        | Average of % Viability | Hits (✓) |
|-----------------------------------------------|------------------------|----------|
| <b>HYDRINDANTIN HYDRATE</b>                   |                        |          |
| 10.0E-9                                       |                        | 118.81   |
| 100.0E-9                                      |                        | 116.35   |
| 1.0E-6                                        |                        | 94.62    |
| 10.0E-6                                       |                        | 73.54    |
| <b>HYDROCHLOROTHIAZIDE</b>                    |                        |          |
| 10.0E-9                                       |                        | 122.18   |
| 100.0E-9                                      |                        | 131.07   |
| 1.0E-6                                        |                        | 96.54    |
| 10.0E-6                                       |                        | 116.16   |
| <b>HYDROCORTISONE</b>                         |                        |          |
| 10.0E-9                                       |                        | 94.29    |
| 100.0E-9                                      |                        | 120.74   |
| 1.0E-6                                        |                        | 75.95    |
| 10.0E-6                                       |                        | 96.24    |
| <b>HYDROCORTISONE ACETATE</b>                 |                        |          |
| 10.0E-9                                       |                        | 127.74   |
| 100.0E-9                                      |                        | 122.66   |
| 1.0E-6                                        |                        | 74.12    |
| 10.0E-6                                       |                        | 99.58    |
| <b>HYDROCORTISONE BUTYRATE</b>                |                        |          |
| 10.0E-9                                       |                        | 100.38   |
| 100.0E-9                                      |                        | 104.45   |
| 1.0E-6                                        |                        | 106.91   |
| 10.0E-6                                       |                        | 102.94   |
| <b>HYDROCORTISONE HEMISUCCINATE</b>           |                        |          |
| 10.0E-9                                       |                        | 120.52   |
| 100.0E-9                                      |                        | 137.73   |
| 1.0E-6                                        |                        | 125.49   |
| 10.0E-6                                       |                        | 97.90    |
| <b>HYDROCORTISONE PHOSPHATE TRIETHYLAMINE</b> |                        |          |
| 10.0E-9                                       |                        | 145.57   |
| 100.0E-9                                      |                        | 133.66   |
| 1.0E-6                                        |                        | 98.73    |
| 10.0E-6                                       |                        | 92.74    |
| <b>HYDROCORTISONE VALERATE</b>                |                        |          |
| 10.0E-9                                       |                        | 83.25    |
| 100.0E-9                                      |                        | 115.57   |
| 1.0E-6                                        |                        | 119.42   |
| 10.0E-6                                       |                        | 96.26    |
| <b>HYDROFLUMETHIAZIDE</b>                     |                        |          |
| 10.0E-9                                       |                        | 127.88   |
| 100.0E-9                                      |                        | 105.38   |
| 1.0E-6                                        |                        | 119.58   |
| 10.0E-6                                       |                        | 117.52   |
| <b>HYDROLYSIS PRODUCT OF BUSSEIN</b>          |                        |          |
| 10.0E-9                                       |                        | 114.89   |
| 100.0E-9                                      |                        | 123.24   |
| 1.0E-6                                        |                        | 93.79    |
| 10.0E-6                                       |                        | 92.66    |
| <b>HYDROQUINIDINE</b>                         |                        |          |
| 10.0E-9                                       |                        | 129.34   |
| 100.0E-9                                      |                        | 87.88    |
| 1.0E-6                                        |                        | 106.19   |
| 10.0E-6                                       |                        | 118.91   |
| <b>HYDROQUININE HYDROBROMIDE HYDRATE</b>      |                        |          |
| 10.0E-9                                       |                        | 75.10    |
| 100.0E-9                                      |                        | 112.38   |
| 1.0E-6                                        |                        | 111.44   |
| 10.0E-6                                       |                        | 139.41   |
| <b>HYDROQUINONE</b>                           |                        |          |
| 10.0E-9                                       |                        | 108.42   |
| 100.0E-9                                      |                        | 115.79   |
| 1.0E-6                                        |                        | 75.41    |
| 10.0E-6                                       |                        | 90.08    |
| <b>HYDROXYCHLOROQUINE SULFATE</b>             |                        |          |
| 10.0E-9                                       |                        | 118.59   |
| 100.0E-9                                      |                        | 136.40   |
| 1.0E-6                                        |                        | 99.69    |
| 10.0E-6                                       |                        | 123.16   |
| <b>HYDROXYPROGESTERONE</b>                    |                        |          |
| 10.0E-9                                       |                        | 79.53    |
| 100.0E-9                                      |                        | 71.85    |
| 1.0E-6                                        |                        | 126.41   |
| 10.0E-6                                       |                        | 84.65    |
| <b>HYDROXYTOLUIC ACID</b>                     |                        |          |
| 10.0E-9                                       |                        | 111.95   |
| 100.0E-9                                      |                        | 112.52   |
| 1.0E-6                                        |                        | 100.06   |
| 10.0E-6                                       |                        | 140.79   |
| <b>HYDROXYUREA</b>                            |                        |          |
| 10.0E-9                                       |                        | 80.98    |
| 100.0E-9                                      |                        | 102.28   |
| 1.0E-6                                        |                        | 84.79    |
| 10.0E-6                                       |                        | 113.32   |



| Compounds and Final Concentrations (M)      | Average of % Viability | Hits (✓) |
|---------------------------------------------|------------------------|----------|
| <b>HYDROXYZINE PAMOATE</b>                  |                        |          |
| 10.0E-9                                     |                        | 63.44    |
| 100.0E-9                                    |                        | 118.50   |
| 1.0E-6                                      |                        | 104.65   |
| 10.0E-6                                     |                        | 73.70    |
| <b>HYMECROMONE METHYL ETHER</b>             |                        |          |
| 10.0E-9                                     |                        | 100.62   |
| 100.0E-9                                    |                        | 91.00    |
| 1.0E-6                                      |                        | 104.46   |
| 10.0E-6                                     |                        | 116.24   |
| <b>HYOSCYAMINE</b>                          |                        |          |
| 10.0E-9                                     |                        | 108.36   |
| 100.0E-9                                    |                        | 114.23   |
| 1.0E-6                                      |                        | 110.19   |
| 10.0E-6                                     |                        | 96.29    |
| <b>HYPOXANTHINE</b>                         |                        |          |
| 10.0E-9                                     |                        | 101.47   |
| 100.0E-9                                    |                        | 117.50   |
| 1.0E-6                                      |                        | 94.69    |
| 10.0E-6                                     |                        | 100.40   |
| <b>IBANDRONATE SODIUM</b>                   |                        |          |
| 10.0E-9                                     |                        | 120.22   |
| 100.0E-9                                    |                        | 133.27   |
| 1.0E-6                                      |                        | 109.17   |
| 10.0E-6                                     |                        | 83.74    |
| <b>IBUPROFEN</b>                            |                        |          |
| 10.0E-9                                     |                        | 96.48    |
| 100.0E-9                                    |                        | 139.60   |
| 1.0E-6                                      |                        | 117.02   |
| 10.0E-6                                     |                        | 103.45   |
| <b>ICARIIN</b>                              |                        |          |
| 10.0E-9                                     |                        | 118.46   |
| 100.0E-9                                    |                        | 134.98   |
| 1.0E-6                                      |                        | 110.24   |
| 10.0E-6                                     |                        | 96.96    |
| <b>IDAZOXAN HYDROCHLORIDE</b>               |                        |          |
| 10.0E-9                                     |                        | 119.39   |
| 100.0E-9                                    |                        | 133.53   |
| 1.0E-6                                      |                        | 97.02    |
| 10.0E-6                                     |                        | 73.54    |
| <b>IDEBENONE</b>                            |                        |          |
| 10.0E-9                                     |                        | 97.14    |
| 100.0E-9                                    |                        | 96.33    |
| 1.0E-6                                      |                        | 110.21   |
| 10.0E-6                                     |                        | 121.90   |
| <b>IFOSFAMIDE</b>                           |                        |          |
| 10.0E-9                                     |                        | 124.91   |
| 100.0E-9                                    |                        | 109.19   |
| 1.0E-6                                      |                        | 98.89    |
| 10.0E-6                                     |                        | 116.60   |
| <b>IMIDAZOL-4-YLACETIC ACID SODIUM SALT</b> |                        |          |
| 10.0E-9                                     |                        | 122.20   |
| 100.0E-9                                    |                        | 115.30   |
| 1.0E-6                                      |                        | 69.91    |
| 10.0E-6                                     |                        | 96.85    |
| <b>IMIPRAMINE HYDROCHLORIDE</b>             |                        |          |
| 10.0E-9                                     |                        | 104.87   |
| 100.0E-9                                    |                        | 132.16   |
| 1.0E-6                                      |                        | 114.62   |
| 10.0E-6                                     |                        | 108.93   |
| <b>INDAPAMIDE</b>                           |                        |          |
| 10.0E-9                                     |                        | 119.78   |
| 100.0E-9                                    |                        | 143.81   |
| 1.0E-6                                      |                        | 68.55    |
| 10.0E-6                                     |                        | 112.42   |
| <b>INDOLE-3-CARBINOL</b>                    |                        |          |
| 10.0E-9                                     |                        | 85.54    |
| 100.0E-9                                    |                        | 93.99    |
| 1.0E-6                                      |                        | 86.64    |
| 10.0E-6                                     |                        | 75.74    |
| <b>INDOMETHACIN</b>                         |                        |          |
| 10.0E-9                                     |                        | 119.81   |
| 100.0E-9                                    |                        | 96.51    |
| 1.0E-6                                      |                        | 98.49    |
| 10.0E-6                                     |                        | 103.71   |
| <b>INDOPROFEN</b>                           |                        |          |
| 10.0E-9                                     |                        | 105.36   |
| 100.0E-9                                    |                        | 122.13   |
| 1.0E-6                                      |                        | 116.93   |
| 10.0E-6                                     |                        | 91.19    |
| <b>INOSITOL</b>                             |                        |          |
| 10.0E-9                                     |                        | 83.03    |
| 100.0E-9                                    |                        | 103.33   |
| 1.0E-6                                      |                        | 104.32   |
| 10.0E-6                                     |                        | 141.71   |

| Compounds and Final Concentrations (M) | Average of % Viability | Hits (✓) |
|----------------------------------------|------------------------|----------|
| <b>IODIPAMIDE</b>                      |                        |          |
| 10.0E-9                                |                        | 109.03   |
| 100.0E-9                               |                        | 73.73    |
| 1.0E-6                                 |                        | 111.74   |
| 10.0E-6                                |                        | 98.09    |
| <b>IODOQUINOL</b>                      |                        |          |
| 10.0E-9                                |                        | 120.80   |
| 100.0E-9                               |                        | 122.75   |
| 1.0E-6                                 |                        | 98.38    |
| 10.0E-6                                |                        | 92.22    |
| <b>IOPANIC ACID</b>                    |                        |          |
| 10.0E-9                                |                        | 104.04   |
| 100.0E-9                               |                        | 112.25   |
| 1.0E-6                                 |                        | 115.37   |
| 10.0E-6                                |                        | 96.49    |
| <b>IPRATROPIUM BROMIDE</b>             |                        |          |
| 10.0E-9                                |                        | 100.51   |
| 100.0E-9                               |                        | 104.24   |
| 1.0E-6                                 |                        | 99.07    |
| 10.0E-6                                |                        | 126.94   |
| <b>IPRIFLAVONE</b>                     |                        |          |
| 10.0E-9                                |                        | 110.13   |
| 100.0E-9                               |                        | 119.67   |
| 1.0E-6                                 |                        | 101.80   |
| 10.0E-6                                |                        | 133.14   |
| <b>IPRONIAZID SULFATE</b>              |                        |          |
| 10.0E-9                                |                        | 136.77   |
| 100.0E-9                               |                        | 123.56   |
| 1.0E-6                                 |                        | 109.78   |
| 10.0E-6                                |                        | 111.16   |
| <b>IRBESARTAN</b>                      |                        |          |
| 10.0E-9                                |                        | 78.55    |
| 100.0E-9                               |                        | 143.14   |
| 1.0E-6                                 |                        | 97.56    |
| 10.0E-6                                |                        | 99.07    |
| <b>IRETOL</b>                          |                        |          |
| 10.0E-9                                |                        | 82.24    |
| 100.0E-9                               |                        | 87.99    |
| 1.0E-6                                 |                        | 130.16   |
| 10.0E-6                                |                        | 89.96    |
| <b>IRIDIN</b>                          |                        |          |
| 10.0E-9                                |                        | 100.55   |
| 100.0E-9                               |                        | 95.95    |
| 1.0E-6                                 |                        | 112.44   |
| 10.0E-6                                |                        | 74.60    |
| <b>IRIGENIN</b>                        |                        |          |
| 10.0E-9                                |                        | 111.83   |
| 100.0E-9                               |                        | 112.90   |
| 1.0E-6                                 |                        | 84.57    |
| 10.0E-6                                |                        | 61.69    |
| <b>IRIGENIN TRIMETHYL ETHER</b>        |                        |          |
| 10.0E-9                                |                        | 108.29   |
| 100.0E-9                               |                        | 115.75   |
| 1.0E-6                                 |                        | 114.23   |
| 10.0E-6                                |                        | 99.40    |
| <b>IRIGENIN, 7-BENZYL ETHER</b>        |                        |          |
| 10.0E-9                                |                        | 121.85   |
| 100.0E-9                               |                        | 131.24   |
| 1.0E-6                                 |                        | 106.23   |
| 10.0E-6                                |                        | 68.90    |
| <b>IRIGENIN, DIBENZYL ETHER</b>        |                        |          |
| 10.0E-9                                |                        | 87.05    |
| 100.0E-9                               |                        | 115.96   |
| 1.0E-6                                 |                        | 96.51    |
| 10.0E-6                                |                        | 110.40   |
| <b>IRIGENOL</b>                        |                        |          |
| 10.0E-9                                |                        | 98.23    |
| 100.0E-9                               |                        | 106.43   |
| 1.0E-6                                 |                        | 106.40   |
| 10.0E-6                                |                        | 137.90   |
| <b>IRIGINOL HEXAAACETATE</b>           |                        |          |
| 10.0E-9                                |                        | 95.30    |
| 100.0E-9                               |                        | 94.95    |
| 1.0E-6                                 |                        | 112.79   |
| 10.0E-6                                |                        | 93.37    |
| <b>ISAXONINE</b>                       |                        |          |
| 10.0E-9                                |                        | 85.19    |
| 100.0E-9                               |                        | 108.96   |
| 1.0E-6                                 |                        | 110.40   |
| 10.0E-6                                |                        | 40.28    |
| <b>ISOBERGAPTENE</b>                   |                        |          |
| 10.0E-9                                |                        | 146.95   |
| 100.0E-9                               |                        | 109.11   |
| 1.0E-6                                 |                        | 117.61   |
| 10.0E-6                                |                        | 120.00   |

| Compounds and Final Concentrations (M) | Average of % Viability | Hits (✓) |
|----------------------------------------|------------------------|----------|
| <b>ISOETHARINE MESYLATE</b>            |                        |          |
| 10.0E-9                                |                        | 150.58   |
| 100.0E-9                               |                        | 116.34   |
| 1.0E-6                                 |                        | 92.88    |
| 10.0E-6                                |                        | 68.53    |
| <b>ISOFLUPREDNONE ACETATE</b>          |                        |          |
| 10.0E-9                                |                        | 78.87    |
| 100.0E-9                               |                        | 81.24    |
| 1.0E-6                                 |                        | 78.01    |
| 10.0E-6                                |                        | 56.17    |
| <b>ISOGUVACINE HYDROCHLORIDE</b>       |                        |          |
| 10.0E-9                                |                        | 85.29    |
| 100.0E-9                               |                        | 107.69   |
| 1.0E-6                                 |                        | 88.04    |
| 10.0E-6                                |                        | 78.38    |
| <b>ISOKOBUSONE</b>                     |                        |          |
| 10.0E-9                                |                        | 123.59   |
| 100.0E-9                               |                        | 101.47   |
| 1.0E-6                                 |                        | 106.23   |
| 10.0E-6                                |                        | 120.98   |
| <b>ISOLIQUIRITIGENIN</b>               |                        |          |
| 10.0E-9                                |                        | 97.29    |
| 100.0E-9                               |                        | 130.69   |
| 1.0E-6                                 |                        | 107.96   |
| 10.0E-6                                |                        | 86.25    |
| <b>ISONIAZID</b>                       |                        |          |
| 10.0E-9                                |                        | 103.96   |
| 100.0E-9                               |                        | 108.13   |
| 1.0E-6                                 |                        | 106.21   |
| 10.0E-6                                |                        | 113.97   |
| <b>ISOPEONOL</b>                       |                        |          |
| 10.0E-9                                |                        | 124.72   |
| 100.0E-9                               |                        | 107.78   |
| 1.0E-6                                 |                        | 75.34    |
| 10.0E-6                                |                        | 115.58   |
| <b>ISOPIMPINELLIN</b>                  |                        |          |
| 10.0E-9                                |                        | 102.52   |
| 100.0E-9                               |                        | 92.54    |
| 1.0E-6                                 |                        | 115.02   |
| 10.0E-6                                |                        | 112.91   |
| <b>ISOPROPAMIDE IODIDE</b>             |                        |          |
| 10.0E-9                                |                        | 121.61   |
| 100.0E-9                               |                        | 104.35   |
| 1.0E-6                                 |                        | 86.44    |
| 10.0E-6                                |                        | 99.38    |
| <b>ISOPROTERENOL HYDROCHLORIDE</b>     |                        |          |
| 10.0E-9                                |                        | 138.87   |
| 100.0E-9                               |                        | 99.00    |
| 1.0E-6                                 |                        | 104.84   |
| 10.0E-6                                |                        | 140.94   |
| <b>ISOROTENONE</b>                     |                        |          |
| 10.0E-9                                |                        | 89.42    |
| 100.0E-9                               |                        | 79.93    |
| 1.0E-6                                 |                        | 109.10   |
| 10.0E-6                                |                        | 82.79    |
| <b>ISOSAFROLE</b>                      |                        |          |
| 10.0E-9                                |                        | 102.55   |
| 100.0E-9                               |                        | 92.87    |
| 1.0E-6                                 |                        | 74.55    |
| 10.0E-6                                |                        | 97.48    |
| <b>ISOSORBIDE DINITRATE</b>            |                        |          |
| 10.0E-9                                |                        | 99.31    |
| 100.0E-9                               |                        | 123.84   |
| 1.0E-6                                 |                        | 118.69   |
| 10.0E-6                                |                        | 89.77    |
| <b>ISOSORBIDE MONONITRATE</b>          |                        |          |
| 10.0E-9                                |                        | 88.00    |
| 100.0E-9                               |                        | 100.00   |
| 1.0E-6                                 |                        | 104.09   |
| 10.0E-6                                |                        | 124.15   |
| <b>ISOTECTORIGENIN, 7-METHYL ETHER</b> |                        |          |
| 10.0E-9                                |                        | 119.98   |
| 100.0E-9                               |                        | 103.27   |
| 1.0E-6                                 |                        | 112.56   |
| 10.0E-6                                |                        | 108.08   |
| <b>ISOTRETINON</b>                     |                        |          |
| 10.0E-9                                |                        | 79.16    |
| 100.0E-9                               |                        | 118.79   |
| 1.0E-6                                 |                        | 204.58   |
| 10.0E-6                                |                        | 160.11   |
| <b>ISOXICAM</b>                        |                        |          |
| 10.0E-9                                |                        | 87.78    |
| 100.0E-9                               |                        | 93.99    |
| 1.0E-6                                 |                        | 101.27   |
| 10.0E-6                                |                        | 89.41    |

| Compounds and Final Concentrations (M) | Average of % Viability | Hits (✓) |
|----------------------------------------|------------------------|----------|
| <b>ISOXSUPRINE HYDROCHLORIDE</b>       |                        |          |
| 10.0E-9                                |                        | 130.38   |
| 100.0E-9                               |                        | 88.52    |
| 1.0E-6                                 |                        | 113.76   |
| 10.0E-6                                |                        | 118.87   |
| <b>ITRACONAZOLE</b>                    |                        |          |
| 10.0E-9                                |                        | 103.58   |
| 100.0E-9                               |                        | 104.38   |
| 1.0E-6                                 |                        | 94.85    |
| 10.0E-6                                |                        | 177.44   |
| <b>IVERMECTIN</b>                      |                        |          |
| 10.0E-9                                |                        | 96.94    |
| 100.0E-9                               |                        | 111.90   |
| 1.0E-6                                 |                        | 117.68   |
| 10.0E-6                                |                        | 0.16     |
| <b>JUAREZIC ACID</b>                   |                        |          |
| 10.0E-9                                |                        | 116.99   |
| 100.0E-9                               |                        | 143.18   |
| 1.0E-6                                 |                        | 119.48   |
| 10.0E-6                                |                        | 108.99   |
| <b>JUGLONE</b>                         |                        |          |
| 10.0E-9                                |                        | 127.61   |
| 100.0E-9                               |                        | 86.59    |
| 1.0E-6                                 |                        | 114.16   |
| 10.0E-6                                |                        | 59.87    |
| <b>KAEMPFEROL</b>                      |                        |          |
| 10.0E-9                                |                        | 124.09   |
| 100.0E-9                               |                        | 111.93   |
| 1.0E-6                                 |                        | 119.98   |
| 10.0E-6                                |                        | 84.62    |
| <b>KAINIC ACID</b>                     |                        |          |
| 10.0E-9                                |                        | 142.00   |
| 100.0E-9                               |                        | 129.64   |
| 1.0E-6                                 |                        | 120.77   |
| 10.0E-6                                |                        | 118.81   |
| <b>KANAMYCIN A SULFATE</b>             |                        |          |
| 10.0E-9                                |                        | 100.64   |
| 100.0E-9                               |                        | 109.41   |
| 1.0E-6                                 |                        | 56.12    |
| 10.0E-6                                |                        | 92.87    |
| <b>KARANJIN</b>                        |                        |          |
| 10.0E-9                                |                        | 95.81    |
| 100.0E-9                               |                        | 101.32   |
| 1.0E-6                                 |                        | 85.68    |
| 10.0E-6                                |                        | 120.70   |
| <b>KASUGAMYCIN HYDROCHLORIDE</b>       |                        |          |
| 10.0E-9                                |                        | 116.07   |
| 100.0E-9                               |                        | 97.89    |
| 1.0E-6                                 |                        | 90.38    |
| 10.0E-6                                |                        | 76.34    |
| <b>KAWAIN</b>                          |                        |          |
| 10.0E-9                                |                        | 94.68    |
| 100.0E-9                               |                        | 105.01   |
| 1.0E-6                                 |                        | 103.10   |
| 10.0E-6                                |                        | 83.63    |
| <b>KETANSERIN TARTRATE</b>             |                        |          |
| 10.0E-9                                |                        | 111.93   |
| 100.0E-9                               |                        | 123.16   |
| 1.0E-6                                 |                        | 100.00   |
| 10.0E-6                                |                        | 141.87   |
| <b>KETOCONAZOLE</b>                    |                        |          |
| 10.0E-9                                |                        | 90.00    |
| 100.0E-9                               |                        | 109.25   |
| 1.0E-6                                 |                        | 62.04    |
| 10.0E-6                                |                        | 83.64    |
| <b>KETOPROFEN</b>                      |                        |          |
| 10.0E-9                                |                        | 83.02    |
| 100.0E-9                               |                        | 108.68   |
| 1.0E-6                                 |                        | 80.35    |
| 10.0E-6                                |                        | 122.02   |
| <b>KETOROLAC TROMETHAMINE</b>          |                        |          |
| 10.0E-9                                |                        | 96.42    |
| 100.0E-9                               |                        | 110.46   |
| 1.0E-6                                 |                        | 95.54    |
| 10.0E-6                                |                        | 99.46    |
| <b>KETOTIFEN FUMARATE</b>              |                        |          |
| 10.0E-9                                |                        | 108.86   |
| 100.0E-9                               |                        | 90.26    |
| 1.0E-6                                 |                        | 111.07   |
| 10.0E-6                                |                        | 118.29   |
| <b>KHAYANTHONE</b>                     |                        |          |
| 10.0E-9                                |                        | 82.29    |
| 100.0E-9                               |                        | 70.05    |
| 1.0E-6                                 |                        | 77.93    |
| 10.0E-6                                |                        | 86.59    |

| Compounds and Final Concentrations (M) | Average of % Viability | Hits (✓) |
|----------------------------------------|------------------------|----------|
| <b>KHIVORIN</b>                        |                        |          |
| 10.0E-9                                |                        | 123.68   |
| 100.0E-9                               |                        | 93.58    |
| 1.0E-6                                 |                        | 97.35    |
| 10.0E-6                                |                        | 112.83   |
| <b>KINETIN</b>                         |                        |          |
| 10.0E-9                                |                        | 100.60   |
| 100.0E-9                               |                        | 92.72    |
| 1.0E-6                                 |                        | 110.71   |
| 10.0E-6                                |                        | 110.92   |
| <b>KINETIN RIBOSIDE</b>                |                        |          |
| 10.0E-9                                |                        | 123.35   |
| 100.0E-9                               |                        | 125.47   |
| 1.0E-6                                 |                        | 40.73    |
| 10.0E-6                                |                        | 4.45     |
| <b>KOBUSONE</b>                        |                        |          |
| 10.0E-9                                |                        | 132.59   |
| 100.0E-9                               |                        | 113.83   |
| 1.0E-6                                 |                        | 116.57   |
| 10.0E-6                                |                        | 86.34    |
| <b>KOJIC ACID</b>                      |                        |          |
| 10.0E-9                                |                        | 104.56   |
| 100.0E-9                               |                        | 132.31   |
| 1.0E-6                                 |                        | 134.32   |
| 10.0E-6                                |                        | 128.47   |
| <b>KOPARIN</b>                         |                        |          |
| 10.0E-9                                |                        | 117.01   |
| 100.0E-9                               |                        | 125.61   |
| 1.0E-6                                 |                        | 108.94   |
| 10.0E-6                                |                        | 116.98   |
| <b>KUHLMANNIN</b>                      |                        |          |
| 10.0E-9                                |                        | 129.59   |
| 100.0E-9                               |                        | 104.65   |
| 1.0E-6                                 |                        | 127.57   |
| 10.0E-6                                |                        | 89.77    |
| <b>KYNURENINE</b>                      |                        |          |
| 10.0E-9                                |                        | 111.20   |
| 100.0E-9                               |                        | 83.44    |
| 1.0E-6                                 |                        | 90.21    |
| 10.0E-6                                |                        | 122.45   |
| <b>L(+/-)-ALLIIN</b>                   |                        |          |
| 10.0E-9                                |                        | 109.57   |
| 100.0E-9                               |                        | 122.77   |
| 1.0E-6                                 |                        | 109.88   |
| 10.0E-6                                |                        | 79.25    |
| <b>LABETALOL HYDROCHLORIDE</b>         |                        |          |
| 10.0E-9                                |                        | 83.28    |
| 100.0E-9                               |                        | 101.72   |
| 1.0E-6                                 |                        | 107.35   |
| 10.0E-6                                |                        | 131.43   |
| <b>LACCAIC ACID A</b>                  |                        |          |
| 10.0E-9                                |                        | 98.80    |
| 100.0E-9                               |                        | 115.73   |
| 1.0E-6                                 |                        | 117.23   |
| 10.0E-6                                |                        | 89.86    |
| <b>LACTOBIONIC ACID</b>                |                        |          |
| 10.0E-9                                |                        | 122.80   |
| 100.0E-9                               |                        | 159.14   |
| 1.0E-6                                 |                        | 73.64    |
| 10.0E-6                                |                        | 80.70    |
| <b>LACTULOSE</b>                       |                        |          |
| 10.0E-9                                |                        | 98.28    |
| 100.0E-9                               |                        | 96.14    |
| 1.0E-6                                 |                        | 110.88   |
| 10.0E-6                                |                        | 110.55   |
| <b>LAGOCHILIN</b>                      |                        |          |
| 10.0E-9                                |                        | 91.80    |
| 100.0E-9                               |                        | 116.56   |
| 1.0E-6                                 |                        | 88.62    |
| 10.0E-6                                |                        | 74.90    |
| <b>LAMOTRIGINE</b>                     |                        |          |
| 10.0E-9                                |                        | 106.13   |
| 100.0E-9                               |                        | 128.92   |
| 1.0E-6                                 |                        | 94.39    |
| 10.0E-6                                |                        | 122.61   |
| <b>LANATOSIDE C</b>                    |                        |          |
| 10.0E-9                                |                        | 95.79    |
| 100.0E-9                               |                        | 119.44   |
| 1.0E-6                                 |                        | 95.63    |
| 10.0E-6                                |                        | 106.72   |
| <b>LANSOPRAZOLE</b>                    |                        |          |
| 10.0E-9                                |                        | 68.41    |
| 100.0E-9                               |                        | 90.51    |
| 1.0E-6                                 |                        | 105.94   |
| 10.0E-6                                |                        | 98.39    |

| Compounds and Final Concentrations (M)        | Average of % Viability | Hits (✓) |
|-----------------------------------------------|------------------------|----------|
| <b>LAPACHOL</b>                               |                        |          |
| 10.0E-9                                       |                        | 79.36    |
| 100.0E-9                                      |                        | 134.58   |
| 1.0E-6                                        |                        | 138.85   |
| 10.0E-6                                       |                        | 101.57   |
| <b>LAPPACONITINE</b>                          |                        |          |
| 10.0E-9                                       |                        | 142.12   |
| 100.0E-9                                      |                        | 91.30    |
| 1.0E-6                                        |                        | 107.12   |
| 10.0E-6                                       |                        | 59.02    |
| <b>LARIXINIC ACID</b>                         |                        |          |
| 10.0E-9                                       |                        | 123.83   |
| 100.0E-9                                      |                        | 103.16   |
| 1.0E-6                                        |                        | 89.58    |
| 10.0E-6                                       |                        | 107.90   |
| <b>LARIXOL</b>                                |                        |          |
| 10.0E-9                                       |                        | 118.84   |
| 100.0E-9                                      |                        | 107.14   |
| 1.0E-6                                        |                        | 115.95   |
| 10.0E-6                                       |                        | 95.39    |
| <b>LARIXOL ACETATE</b>                        |                        |          |
| 10.0E-9                                       |                        | 105.46   |
| 100.0E-9                                      |                        | 77.69    |
| 1.0E-6                                        |                        | 95.71    |
| 10.0E-6                                       |                        | 107.26   |
| <b>LATHOSTEROL</b>                            |                        |          |
| 10.0E-9                                       |                        | 98.05    |
| 100.0E-9                                      |                        | 78.10    |
| 1.0E-6                                        |                        | 106.01   |
| 10.0E-6                                       |                        | 90.67    |
| <b>L-BUTHIONINE SULFOXIMINE</b>               |                        |          |
| 10.0E-9                                       |                        | 89.90    |
| 100.0E-9                                      |                        | 127.54   |
| 1.0E-6                                        |                        | 85.53    |
| 10.0E-6                                       |                        | 103.26   |
| <b>L-DEOXYALLIIN</b>                          |                        |          |
| 10.0E-9                                       |                        | 122.04   |
| 100.0E-9                                      |                        | 96.40    |
| 1.0E-6                                        |                        | 87.71    |
| 10.0E-6                                       |                        | 109.54   |
| <b>LECANORIC ACID</b>                         |                        |          |
| 10.0E-9                                       |                        | 85.14    |
| 100.0E-9                                      |                        | 100.76   |
| 1.0E-6                                        |                        | 106.29   |
| 10.0E-6                                       |                        | 75.19    |
| <b>LEOIDIN</b>                                |                        |          |
| 10.0E-9                                       |                        | 108.43   |
| 100.0E-9                                      |                        | 134.50   |
| 1.0E-6                                        |                        | 119.46   |
| 10.0E-6                                       |                        | 123.62   |
| <b>LEUCODIN</b>                               |                        |          |
| 10.0E-9                                       |                        | 92.42    |
| 100.0E-9                                      |                        | 76.41    |
| 1.0E-6                                        |                        | 95.37    |
| 10.0E-6                                       |                        | 112.73   |
| <b>LEUCOVORIN CALCIUM</b>                     |                        |          |
| 10.0E-9                                       |                        | 98.50    |
| 100.0E-9                                      |                        | 142.47   |
| 1.0E-6                                        |                        | 91.69    |
| 10.0E-6                                       |                        | 111.00   |
| <b>LEVABUTEROL HYDROCHLORIDE</b>              |                        |          |
| 10.0E-9                                       |                        | 80.37    |
| 100.0E-9                                      |                        | 107.27   |
| 1.0E-6                                        |                        | 72.88    |
| 10.0E-6                                       |                        | 81.80    |
| <b>LEVAMISOLE HYDROCHLORIDE</b>               |                        |          |
| 10.0E-9                                       |                        | 114.25   |
| 100.0E-9                                      |                        | 82.75    |
| 1.0E-6                                        |                        | 99.33    |
| 10.0E-6                                       |                        | 90.28    |
| <b>LEVOCARNITINE</b>                          |                        |          |
| 10.0E-9                                       |                        | 87.59    |
| 100.0E-9                                      |                        | 102.62   |
| 1.0E-6                                        |                        | 107.53   |
| 10.0E-6                                       |                        | 123.19   |
| <b>LEVOCARNITINE PROPIONATE HYDROCHLORIDE</b> |                        |          |
| 10.0E-9                                       |                        | 85.19    |
| 100.0E-9                                      |                        | 104.52   |
| 1.0E-6                                        |                        | 94.19    |
| 10.0E-6                                       |                        | 79.67    |
| <b>LEVODOPA</b>                               |                        |          |
| 10.0E-9                                       |                        | 83.69    |
| 100.0E-9                                      |                        | 116.23   |
| 1.0E-6                                        |                        | 73.28    |
| 10.0E-6                                       |                        | 75.59    |

| Compounds and Final Concentrations (M) | Average of % Viability | Hits (✓) |
|----------------------------------------|------------------------|----------|
| <b>LEVOFLOXACIN</b>                    |                        |          |
| 10.0E-9                                |                        | 114.33   |
| 100.0E-9                               |                        | 100.64   |
| 1.0E-6                                 |                        | 105.06   |
| 10.0E-6                                |                        | 92.57    |
| <b>LEVONORDEFIN</b>                    |                        |          |
| 10.0E-9                                |                        | 114.45   |
| 100.0E-9                               |                        | 78.42    |
| 1.0E-6                                 |                        | 121.12   |
| 10.0E-6                                |                        | 106.55   |
| <b>LEVULINIC ACID, 3-BENZYLIDENYL-</b> |                        |          |
| 10.0E-9                                |                        | 75.89    |
| 100.0E-9                               |                        | 97.89    |
| 1.0E-6                                 |                        | 107.21   |
| 10.0E-6                                |                        | 109.18   |
| <b>LIDOCAINE HYDROCHLORIDE</b>         |                        |          |
| 10.0E-9                                |                        | 119.36   |
| 100.0E-9                               |                        | 117.04   |
| 1.0E-6                                 |                        | 117.17   |
| 10.0E-6                                |                        | 80.15    |
| <b>LIGUSTILIDE</b>                     |                        |          |
| 10.0E-9                                |                        | 119.58   |
| 100.0E-9                               |                        | 128.15   |
| 1.0E-6                                 |                        | 104.88   |
| 10.0E-6                                |                        | 78.40    |
| <b>LIMONIN</b>                         |                        |          |
| 10.0E-9                                |                        | 116.83   |
| 100.0E-9                               |                        | 121.63   |
| 1.0E-6                                 |                        | 114.56   |
| 10.0E-6                                |                        | 98.65    |
| <b>LINALOOL (+)</b>                    |                        |          |
| 10.0E-9                                |                        | 140.48   |
| 100.0E-9                               |                        | 135.14   |
| 1.0E-6                                 |                        | 117.26   |
| 10.0E-6                                |                        | 78.36    |
| <b>LINAMARIN</b>                       |                        |          |
| 10.0E-9                                |                        | 89.92    |
| 100.0E-9                               |                        | 93.42    |
| 1.0E-6                                 |                        | 114.74   |
| 10.0E-6                                |                        | 96.89    |
| <b>LINCOMYCIN HYDROCHLORIDE</b>        |                        |          |
| 10.0E-9                                |                        | 102.48   |
| 100.0E-9                               |                        | 139.45   |
| 1.0E-6                                 |                        | 115.68   |
| 10.0E-6                                |                        | 87.96    |
| <b>LINDANE</b>                         |                        |          |
| 10.0E-9                                |                        | 85.89    |
| 100.0E-9                               |                        | 99.11    |
| 1.0E-6                                 |                        | 78.75    |
| 10.0E-6                                |                        | 131.44   |
| <b>LIOTHYRONINE</b>                    |                        |          |
| 10.0E-9                                |                        | 124.60   |
| 100.0E-9                               |                        | 104.98   |
| 1.0E-6                                 |                        | 114.93   |
| 10.0E-6                                |                        | 67.25    |
| <b>LIOTHYRONINE (L- isomer) SODIUM</b> |                        |          |
| 10.0E-9                                |                        | 92.77    |
| 100.0E-9                               |                        | 95.71    |
| 1.0E-6                                 |                        | 113.43   |
| 10.0E-6                                |                        | 86.64    |
| <b>LIPOAMIDE</b>                       |                        |          |
| 10.0E-9                                |                        | 111.09   |
| 100.0E-9                               |                        | 101.87   |
| 1.0E-6                                 |                        | 126.11   |
| 10.0E-6                                |                        | 93.40    |
| <b>LISINAPRIL</b>                      |                        |          |
| 10.0E-9                                |                        | 105.67   |
| 100.0E-9                               |                        | 96.65    |
| 1.0E-6                                 |                        | 85.15    |
| 10.0E-6                                |                        | 111.83   |
| <b>LITHIUM CITRATE</b>                 |                        |          |
| 10.0E-9                                |                        | 121.13   |
| 100.0E-9                               |                        | 124.17   |
| 1.0E-6                                 |                        | 83.55    |
| 10.0E-6                                |                        | 131.51   |
| <b>LITHOCHOL-11-ENIC ACID</b>          |                        |          |
| 10.0E-9                                |                        | 119.47   |
| 100.0E-9                               |                        | 70.75    |
| 1.0E-6                                 |                        | 88.11    |
| 10.0E-6                                |                        | 66.04    |
| <b>LITHOCHOLIC ACID</b>                |                        |          |
| 10.0E-9                                |                        | 136.22   |
| 100.0E-9                               |                        | 113.67   |
| 1.0E-6                                 |                        | 100.90   |
| 10.0E-6                                |                        | 87.18    |

| Compounds and Final Concentrations (M) | Average of % Viability | Hits (✓) |
|----------------------------------------|------------------------|----------|
| <b>L-LEUCYL-L-ALANINE</b>              |                        |          |
| 10.0E-9                                |                        | 133.60   |
| 100.0E-9                               |                        | 108.90   |
| 1.0E-6                                 |                        | 112.82   |
| 10.0E-6                                |                        | 68.70    |
| <b>LOBARIC ACID</b>                    |                        | ✓        |
| 10.0E-9                                |                        | 155.87   |
| 100.0E-9                               |                        | 138.55   |
| 1.0E-6                                 |                        | 124.06   |
| 10.0E-6                                |                        | 97.76    |
| <b>LOBELINE HYDROCHLORIDE</b>          |                        |          |
| 10.0E-9                                |                        | 116.03   |
| 100.0E-9                               |                        | 95.41    |
| 1.0E-6                                 |                        | 109.72   |
| 10.0E-6                                |                        | 89.45    |
| <b>LOBENDAZOLE</b>                     |                        |          |
| 10.0E-9                                |                        | 100.14   |
| 100.0E-9                               |                        | 85.29    |
| 1.0E-6                                 |                        | 112.73   |
| 10.0E-6                                |                        | 85.02    |
| <b>LOMEFLOXACIN HYDROCHLORIDE</b>      |                        |          |
| 10.0E-9                                |                        | 118.15   |
| 100.0E-9                               |                        | 120.09   |
| 1.0E-6                                 |                        | 71.68    |
| 10.0E-6                                |                        | 160.39   |
| <b>LOPERAMIDE HYDROCHLORIDE</b>        |                        |          |
| 10.0E-9                                |                        | 121.91   |
| 100.0E-9                               |                        | 79.01    |
| 1.0E-6                                 |                        | 118.62   |
| 10.0E-6                                |                        | 90.06    |
| <b>LORATADINE</b>                      |                        |          |
| 10.0E-9                                |                        | 156.62   |
| 100.0E-9                               |                        | 140.39   |
| 1.0E-6                                 |                        | 123.13   |
| 10.0E-6                                |                        | 101.88   |
| <b>LOSARTAN</b>                        |                        |          |
| 10.0E-9                                |                        | 108.99   |
| 100.0E-9                               |                        | 115.18   |
| 1.0E-6                                 |                        | 75.68    |
| 10.0E-6                                |                        | 120.02   |
| <b>LOVASTATIN</b>                      |                        |          |
| 10.0E-9                                |                        | 88.76    |
| 100.0E-9                               |                        | 112.23   |
| 1.0E-6                                 |                        | 79.41    |
| 10.0E-6                                |                        | 63.19    |
| <b>LOXAPINE SUCCINATE</b>              |                        |          |
| 10.0E-9                                |                        | 111.06   |
| 100.0E-9                               |                        | 134.15   |
| 1.0E-6                                 |                        | 103.75   |
| 10.0E-6                                |                        | 150.30   |
| <b>L-PHENYLALANINOL</b>                |                        |          |
| 10.0E-9                                |                        | 96.26    |
| 100.0E-9                               |                        | 110.66   |
| 1.0E-6                                 |                        | 115.93   |
| 10.0E-6                                |                        | 142.72   |
| <b>LUFENURON</b>                       |                        |          |
| 10.0E-9                                |                        | 103.72   |
| 100.0E-9                               |                        | 85.47    |
| 1.0E-6                                 |                        | 107.36   |
| 10.0E-6                                |                        | 87.37    |
| <b>LUNARINE</b>                        |                        |          |
| 10.0E-9                                |                        | 105.36   |
| 100.0E-9                               |                        | 151.22   |
| 1.0E-6                                 |                        | 122.18   |
| 10.0E-6                                |                        | 127.00   |
| <b>LUPANINE PERCHLORATE</b>            |                        |          |
| 10.0E-9                                |                        | 136.99   |
| 100.0E-9                               |                        | 123.47   |
| 1.0E-6                                 |                        | 117.92   |
| 10.0E-6                                |                        | 99.53    |
| <b>LUPANYL ACID HYDROCHLORIDE</b>      |                        |          |
| 10.0E-9                                |                        | 136.10   |
| 100.0E-9                               |                        | 115.69   |
| 1.0E-6                                 |                        | 133.60   |
| 10.0E-6                                |                        | 112.64   |
| <b>LUPEOL</b>                          |                        |          |
| 10.0E-9                                |                        | 114.99   |
| 100.0E-9                               |                        | 107.07   |
| 1.0E-6                                 |                        | 108.85   |
| 10.0E-6                                |                        | 131.72   |
| <b>LUPININE</b>                        |                        |          |
| 10.0E-9                                |                        | 115.63   |
| 100.0E-9                               |                        | 124.11   |
| 1.0E-6                                 |                        | 83.89    |
| 10.0E-6                                |                        | 91.83    |



| Compounds and Final Concentrations (M)                       | Average of % Viability | Hits (✓) |
|--------------------------------------------------------------|------------------------|----------|
| <b>MADECASSIC ACID</b>                                       |                        |          |
| 10.0E-9                                                      |                        | 131.41   |
| 100.0E-9                                                     |                        | 81.72    |
| 1.0E-6                                                       |                        | 132.10   |
| 10.0E-6                                                      |                        | 96.55    |
| <b>MAFENIDE HYDROCHLORIDE</b>                                |                        |          |
| 10.0E-9                                                      |                        | 86.34    |
| 100.0E-9                                                     |                        | 103.23   |
| 1.0E-6                                                       |                        | 74.48    |
| 10.0E-6                                                      |                        | 91.11    |
| <b>MALATHION</b>                                             |                        |          |
| 10.0E-9                                                      |                        | 113.27   |
| 100.0E-9                                                     |                        | 105.64   |
| 1.0E-6                                                       |                        | 49.61    |
| 10.0E-6                                                      |                        | 44.67    |
| <b>MANDELIC ACID, METHYL ESTER</b>                           |                        |          |
| 10.0E-9                                                      |                        | 113.34   |
| 100.0E-9                                                     |                        | 97.84    |
| 1.0E-6                                                       |                        | 132.17   |
| 10.0E-6                                                      |                        | 128.51   |
| <b>MANGANESE TETRAKIS(4-CARBOXYPHENYL)PORPHYRIN CHLORIDE</b> |                        |          |
| 10.0E-9                                                      |                        | 92.36    |
| 100.0E-9                                                     |                        | 139.82   |
| 1.0E-6                                                       |                        | 128.80   |
| 10.0E-6                                                      |                        | 119.26   |
| <b>MANGIFERIN</b>                                            |                        |          |
| 10.0E-9                                                      |                        | 88.41    |
| 100.0E-9                                                     |                        | 111.01   |
| 1.0E-6                                                       |                        | 123.05   |
| 10.0E-6                                                      |                        | 102.24   |
| <b>MANGOSTIN TRIMETHYL ETHER</b>                             |                        |          |
| 10.0E-9                                                      |                        | 143.50   |
| 100.0E-9                                                     |                        | 114.54   |
| 1.0E-6                                                       |                        | 115.94   |
| 10.0E-6                                                      |                        | 67.80    |
| <b>MANNITOL</b>                                              |                        |          |
| 10.0E-9                                                      |                        | 110.17   |
| 100.0E-9                                                     |                        | 165.40   |
| 1.0E-6                                                       |                        | 105.97   |
| 10.0E-6                                                      |                        | 87.71    |
| <b>MAPROTILINE HYDROCHLORIDE</b>                             |                        |          |
| 10.0E-9                                                      |                        | 100.58   |
| 100.0E-9                                                     |                        | 113.77   |
| 1.0E-6                                                       |                        | 102.62   |
| 10.0E-6                                                      |                        | 29.06    |
| <b>MEBENDAZOLE</b>                                           |                        |          |
| 10.0E-9                                                      |                        | 70.76    |
| 100.0E-9                                                     |                        | 102.31   |
| 1.0E-6                                                       |                        | 98.48    |
| 10.0E-6                                                      |                        | 65.26    |
| <b>MEBEVERINE HYDROCHLORIDE</b>                              |                        |          |
| 10.0E-9                                                      |                        | 69.64    |
| 100.0E-9                                                     |                        | 94.24    |
| 1.0E-6                                                       |                        | 100.51   |
| 10.0E-6                                                      |                        | 69.25    |
| <b>MEBHYDROLIN NAPHTHALENESULFONATE</b>                      |                        |          |
| 10.0E-9                                                      |                        | 115.70   |
| 100.0E-9                                                     |                        | 142.22   |
| 1.0E-6                                                       |                        | 81.60    |
| 10.0E-6                                                      |                        | 123.32   |
| <b>MECHLORETHAMINE</b>                                       |                        |          |
| 10.0E-9                                                      |                        | 98.27    |
| 100.0E-9                                                     |                        | 93.40    |
| 1.0E-6                                                       |                        | 103.28   |
| 10.0E-6                                                      |                        | 89.07    |
| <b>MECLIZINE HYDROCHLORIDE</b>                               |                        |          |
| 10.0E-9                                                      |                        | 111.97   |
| 100.0E-9                                                     |                        | 115.62   |
| 1.0E-6                                                       |                        | 78.61    |
| 10.0E-6                                                      |                        | 109.71   |
| <b>MECLOCYCLINE SULFOSALICYLATE</b>                          |                        |          |
| 10.0E-9                                                      |                        | 108.99   |
| 100.0E-9                                                     |                        | 158.92   |
| 1.0E-6                                                       |                        | 90.48    |
| 10.0E-6                                                      |                        | 80.80    |
| <b>MECLOFENAMATE SODIUM</b>                                  |                        |          |
| 10.0E-9                                                      |                        | 103.23   |
| 100.0E-9                                                     |                        | 77.07    |
| 1.0E-6                                                       |                        | 51.01    |
| 10.0E-6                                                      |                        | 138.59   |
| <b>MECYSTEINE HYDROCHLORIDE</b>                              |                        |          |
| 10.0E-9                                                      |                        | 97.16    |
| 100.0E-9                                                     |                        | 126.30   |
| 1.0E-6                                                       |                        | 110.72   |
| 10.0E-6                                                      |                        | 107.73   |

| Compounds and Final Concentrations (M) | Average of % Viability | Hits (✓) |
|----------------------------------------|------------------------|----------|
| <b>MEDROXYPROGESTERONE ACETATE</b>     |                        |          |
| 10.0E-9                                |                        | 107.62   |
| 100.0E-9                               |                        | 122.00   |
| 1.0E-6                                 |                        | 76.09    |
| 10.0E-6                                |                        | 46.92    |
| <b>MEDRYSONE</b>                       |                        |          |
| 10.0E-9                                |                        | 83.47    |
| 100.0E-9                               |                        | 116.23   |
| 1.0E-6                                 |                        | 87.01    |
| 10.0E-6                                |                        | 95.19    |
| <b>MEFENAMIC ACID</b>                  |                        |          |
| 10.0E-9                                |                        | 103.69   |
| 100.0E-9                               |                        | 70.19    |
| 1.0E-6                                 |                        | 89.55    |
| 10.0E-6                                |                        | 89.00    |
| <b>MEFEXAMIDE</b>                      |                        |          |
| 10.0E-9                                |                        | 86.88    |
| 100.0E-9                               |                        | 128.00   |
| 1.0E-6                                 |                        | 90.75    |
| 10.0E-6                                |                        | 78.72    |
| <b>MEFLOQUINE</b>                      |                        |          |
| 10.0E-9                                |                        | 110.92   |
| 100.0E-9                               |                        | 93.99    |
| 1.0E-6                                 |                        | 104.09   |
| 10.0E-6                                |                        | 88.46    |
| <b>MEGESTROL ACETATE</b>               |                        |          |
| 10.0E-9                                |                        | 105.67   |
| 100.0E-9                               |                        | 99.83    |
| 1.0E-6                                 |                        | 104.48   |
| 10.0E-6                                |                        | 80.81    |
| <b>MEGLUMINE</b>                       |                        |          |
| 10.0E-9                                |                        | 84.33    |
| 100.0E-9                               |                        | 79.26    |
| 1.0E-6                                 |                        | 91.24    |
| 10.0E-6                                |                        | 82.22    |
| <b>MELATONIN</b>                       |                        |          |
| 10.0E-9                                |                        | 117.00   |
| 100.0E-9                               |                        | 93.83    |
| 1.0E-6                                 |                        | 71.76    |
| 10.0E-6                                |                        | 99.52    |
| <b>MELENGESTROL ACETATE</b>            |                        |          |
| 10.0E-9                                |                        | 110.15   |
| 100.0E-9                               |                        | 113.06   |
| 1.0E-6                                 |                        | 106.77   |
| 10.0E-6                                |                        | 58.13    |
| <b>MELEZITOSE</b>                      |                        |          |
| 10.0E-9                                |                        | 106.41   |
| 100.0E-9                               |                        | 115.13   |
| 1.0E-6                                 |                        | 106.34   |
| 10.0E-6                                |                        | 120.02   |
| <b>MELIBIOSE</b>                       |                        |          |
| 10.0E-9                                |                        | 120.71   |
| 100.0E-9                               |                        | 120.10   |
| 1.0E-6                                 |                        | 107.03   |
| 10.0E-6                                |                        | 77.47    |
| <b>MELOXICAM SODIUM</b>                |                        |          |
| 10.0E-9                                |                        | 103.45   |
| 100.0E-9                               |                        | 72.40    |
| 1.0E-6                                 |                        | 114.23   |
| 10.0E-6                                |                        | 135.65   |
| <b>MELPHALAN</b>                       |                        |          |
| 10.0E-9                                |                        | 102.13   |
| 100.0E-9                               |                        | 128.95   |
| 1.0E-6                                 |                        | 69.01    |
| 10.0E-6                                |                        | 101.40   |
| <b>MEMANTINE HYDROCHLORIDE</b>         |                        |          |
| 10.0E-9                                |                        | 105.78   |
| 100.0E-9                               |                        | 119.20   |
| 1.0E-6                                 |                        | 89.42    |
| 10.0E-6                                |                        | 108.66   |
| <b>MENADIONE</b>                       |                        |          |
| 10.0E-9                                |                        | 95.49    |
| 100.0E-9                               |                        | 107.55   |
| 1.0E-6                                 |                        | 97.39    |
| 10.0E-6                                |                        | 62.23    |
| <b>MENAQUINONE-4</b>                   |                        |          |
| 10.0E-9                                |                        | 104.39   |
| 100.0E-9                               |                        | 150.32   |
| 1.0E-6                                 |                        | 114.07   |
| 10.0E-6                                |                        | 120.77   |
| <b>MENTHOL(-)</b>                      |                        |          |
| 10.0E-9                                |                        | 91.94    |
| 100.0E-9                               |                        | 106.58   |
| 1.0E-6                                 |                        | 100.12   |
| 10.0E-6                                |                        | 107.81   |

| Compounds and Final Concentrations (M) | Average of % Viability | Hits (✓) |
|----------------------------------------|------------------------|----------|
| <b>MENTHONE</b>                        |                        |          |
| 10.0E-9                                |                        | 96.68    |
| 100.0E-9                               |                        | 150.64   |
| 1.0E-6                                 |                        | 110.58   |
| 10.0E-6                                |                        | 124.90   |
| <b>MENTHYL BENZOATE</b>                |                        |          |
| 10.0E-9                                |                        | 115.09   |
| 100.0E-9                               |                        | 114.57   |
| 1.0E-6                                 |                        | 112.25   |
| 10.0E-6                                |                        | 101.28   |
| <b>MEPIZOLATE BROMIDE</b>              |                        |          |
| 10.0E-9                                |                        | 90.60    |
| 100.0E-9                               |                        | 90.04    |
| 1.0E-6                                 |                        | 73.16    |
| 10.0E-6                                |                        | 90.80    |
| <b>MEPHENTERMINE SULFATE</b>           |                        |          |
| 10.0E-9                                |                        | 87.96    |
| 100.0E-9                               |                        | 117.18   |
| 1.0E-6                                 |                        | 81.70    |
| 10.0E-6                                |                        | 117.58   |
| <b>MEPIROXOL</b>                       |                        |          |
| 10.0E-9                                |                        | 87.11    |
| 100.0E-9                               |                        | 109.65   |
| 1.0E-6                                 |                        | 95.30    |
| 10.0E-6                                |                        | 92.03    |
| <b>MEPIVACAINE HYDROCHLORIDE</b>       |                        |          |
| 10.0E-9                                |                        | 77.72    |
| 100.0E-9                               |                        | 124.21   |
| 1.0E-6                                 |                        | 79.82    |
| 10.0E-6                                |                        | 88.00    |
| <b>MERCAPTOPYRINE</b>                  |                        |          |
| 10.0E-9                                |                        | 69.53    |
| 100.0E-9                               |                        | 74.70    |
| 1.0E-6                                 |                        | 120.38   |
| 10.0E-6                                |                        | 89.83    |
| <b>MEROGEDUNIN</b>                     |                        |          |
| 10.0E-9                                |                        | 97.69    |
| 100.0E-9                               |                        | 132.82   |
| 1.0E-6                                 |                        | 77.11    |
| 10.0E-6                                |                        | 123.62   |
| <b>MESALAMINE</b>                      |                        |          |
| 10.0E-9                                |                        | 100.88   |
| 100.0E-9                               |                        | 96.82    |
| 1.0E-6                                 |                        | 110.50   |
| 10.0E-6                                |                        | 142.07   |
| <b>MESNA</b>                           |                        |          |
| 10.0E-9                                |                        | 100.64   |
| 100.0E-9                               |                        | 106.98   |
| 1.0E-6                                 |                        | 89.81    |
| 10.0E-6                                |                        | 107.02   |
| <b>MESTRANOL</b>                       |                        |          |
| 10.0E-9                                |                        | 97.93    |
| 100.0E-9                               |                        | 99.88    |
| 1.0E-6                                 |                        | 87.68    |
| 10.0E-6                                |                        | 94.18    |
| <b>METACETAMOL</b>                     |                        |          |
| 10.0E-9                                |                        | 164.57   |
| 100.0E-9                               |                        | 120.98   |
| 1.0E-6                                 |                        | 116.00   |
| 10.0E-6                                |                        | 106.01   |
| <b>METAMECONINE</b>                    |                        |          |
| 10.0E-9                                |                        | 99.99    |
| 100.0E-9                               |                        | 115.26   |
| 1.0E-6                                 |                        | 140.92   |
| 10.0E-6                                |                        | 94.38    |
| <b>METAMPICILLIN SODIUM</b>            |                        |          |
| 10.0E-9                                |                        | 95.34    |
| 100.0E-9                               |                        | 79.40    |
| 1.0E-6                                 |                        | 93.08    |
| 10.0E-6                                |                        | 118.91   |
| <b>METAPROTERENOL</b>                  |                        |          |
| 10.0E-9                                |                        | 86.12    |
| 100.0E-9                               |                        | 94.50    |
| 1.0E-6                                 |                        | 87.01    |
| 10.0E-6                                |                        | 77.72    |
| <b>METARAMINOL BITARTRATE</b>          |                        |          |
| 10.0E-9                                |                        | 106.28   |
| 100.0E-9                               |                        | 93.66    |
| 1.0E-6                                 |                        | 130.27   |
| 10.0E-6                                |                        | 104.64   |
| <b>METAXALONE</b>                      |                        |          |
| 10.0E-9                                |                        | 88.55    |
| 100.0E-9                               |                        | 91.85    |
| 1.0E-6                                 |                        | 78.35    |
| 10.0E-6                                |                        | 129.32   |

| Compounds and Final Concentrations (M) |  | Average of % Viability | Hits (✓) |
|----------------------------------------|--|------------------------|----------|
| Row Labels                             |  |                        |          |
| <b>METERGOLINE</b>                     |  |                        |          |
| 10.0E-9                                |  | 103.72                 | ✓        |
| 100.0E-9                               |  | 74.14                  |          |
| 1.0E-6                                 |  | 109.80                 |          |
| 10.0E-6                                |  | 135.15                 |          |
| <b>METFORMIN HYDROCHLORIDE</b>         |  |                        |          |
| 10.0E-9                                |  | 100.71                 |          |
| 100.0E-9                               |  | 99.88                  |          |
| 1.0E-6                                 |  | 95.55                  |          |
| 10.0E-6                                |  | 148.99                 |          |
| <b>METHACHOLINE CHLORIDE</b>           |  |                        |          |
| 10.0E-9                                |  | 103.57                 |          |
| 100.0E-9                               |  | 105.99                 |          |
| 1.0E-6                                 |  | 105.55                 |          |
| 10.0E-6                                |  | 143.72                 |          |
| <b>METHACYCLINE HYDROCHLORIDE</b>      |  |                        |          |
| 10.0E-9                                |  | 103.78                 |          |
| 100.0E-9                               |  | 119.58                 |          |
| 1.0E-6                                 |  | 131.42                 |          |
| 10.0E-6                                |  | 90.08                  |          |
| <b>METHAPYRILENE HYDROCHLORIDE</b>     |  |                        |          |
| 10.0E-9                                |  | 86.26                  |          |
| 100.0E-9                               |  | 74.61                  |          |
| 1.0E-6                                 |  | 111.32                 |          |
| 10.0E-6                                |  | 125.81                 |          |
| <b>METHAZOLAMIDE</b>                   |  |                        |          |
| 10.0E-9                                |  | 55.14                  |          |
| 100.0E-9                               |  | 79.39                  |          |
| 1.0E-6                                 |  | 97.83                  |          |
| 10.0E-6                                |  | 102.82                 |          |
| <b>METHENAMINE</b>                     |  |                        |          |
| 10.0E-9                                |  | 92.47                  |          |
| 100.0E-9                               |  | 88.90                  |          |
| 1.0E-6                                 |  | 85.04                  |          |
| 10.0E-6                                |  | 88.93                  |          |
| <b>METHICILLIN SODIUM</b>              |  |                        |          |
| 10.0E-9                                |  | 90.64                  |          |
| 100.0E-9                               |  | 91.17                  |          |
| 1.0E-6                                 |  | 80.11                  |          |
| 10.0E-6                                |  | 109.45                 |          |
| <b>METHIMAZOLE</b>                     |  |                        |          |
| 10.0E-9                                |  | 88.16                  |          |
| 100.0E-9                               |  | 111.42                 |          |
| 1.0E-6                                 |  | 67.88                  |          |
| 10.0E-6                                |  | 93.15                  |          |
| <b>METHIONINE SULFOXIMINE (L)</b>      |  |                        |          |
| 10.0E-9                                |  | 92.36                  |          |
| 100.0E-9                               |  | 83.81                  |          |
| 1.0E-6                                 |  | 91.23                  |          |
| 10.0E-6                                |  | 110.27                 |          |
| <b>METHOCARBAMOL</b>                   |  |                        |          |
| 10.0E-9                                |  | 63.69                  |          |
| 100.0E-9                               |  | 120.84                 |          |
| 1.0E-6                                 |  | 87.95                  |          |
| 10.0E-6                                |  | 127.24                 |          |
| <b>METHOPRENE (S)</b>                  |  |                        |          |
| 10.0E-9                                |  | 113.74                 |          |
| 100.0E-9                               |  | 96.28                  |          |
| 1.0E-6                                 |  | 107.03                 |          |
| 10.0E-6                                |  | 87.47                  |          |
| <b>METHOTREXATE(+/-)</b>               |  |                        |          |
| 10.0E-9                                |  | 92.97                  |          |
| 100.0E-9                               |  | 120.44                 |          |
| 1.0E-6                                 |  | 94.48                  |          |
| 10.0E-6                                |  | 100.40                 |          |
| <b>METHOXAMINE HYDROCHLORIDE</b>       |  |                        |          |
| 10.0E-9                                |  | 86.00                  |          |
| 100.0E-9                               |  | 108.65                 |          |
| 1.0E-6                                 |  | 122.22                 |          |
| 10.0E-6                                |  | 81.80                  |          |
| <b>METHOXSALEN</b>                     |  |                        |          |
| 10.0E-9                                |  | 148.28                 |          |
| 100.0E-9                               |  | 96.42                  |          |
| 1.0E-6                                 |  | 73.00                  |          |
| 10.0E-6                                |  | 90.99                  |          |
| <b>METHOXYAMINE HYDROCHLORIDE</b>      |  |                        |          |
| 10.0E-9                                |  | 104.42                 |          |
| 100.0E-9                               |  | 77.02                  |          |
| 1.0E-6                                 |  | 104.79                 |          |
| 10.0E-6                                |  | 106.61                 |          |
| <b>METHOXYVONE</b>                     |  |                        |          |
| 10.0E-9                                |  | 102.11                 |          |
| 100.0E-9                               |  | 89.07                  |          |
| 1.0E-6                                 |  | 98.09                  |          |
| 10.0E-6                                |  | 52.82                  |          |

| Compounds and Final Concentrations (M)             | Average of % Viability | Hits (✓) |
|----------------------------------------------------|------------------------|----------|
| <b>METHSCOPOLAMINE BROMIDE</b>                     |                        |          |
| 10.0E-9                                            |                        | 131.30   |
| 100.0E-9                                           |                        | 106.22   |
| 1.0E-6                                             |                        | 89.15    |
| 10.0E-6                                            |                        | 101.49   |
| <b>METHYL 7-DESHYDROXYPYROGALLIN-4-CARBOXYLATE</b> |                        |          |
| 10.0E-9                                            |                        | 69.55    |
| 100.0E-9                                           |                        | 87.66    |
| 1.0E-6                                             |                        | 90.44    |
| 10.0E-6                                            |                        | 116.02   |
| <b>METHYL DEOXYCHOLATE</b>                         |                        |          |
| 10.0E-9                                            |                        | 135.18   |
| 100.0E-9                                           |                        | 104.34   |
| 1.0E-6                                             |                        | 89.61    |
| 10.0E-6                                            |                        | 66.57    |
| <b>METHYL ORSELLINATE</b>                          |                        |          |
| 10.0E-9                                            |                        | 98.23    |
| 100.0E-9                                           |                        | 84.19    |
| 1.0E-6                                             |                        | 102.62   |
| 10.0E-6                                            |                        | 121.86   |
| <b>METHYL ROBUSTONE</b>                            |                        |          |
| 10.0E-9                                            |                        | 93.90    |
| 100.0E-9                                           |                        | 112.30   |
| 1.0E-6                                             |                        | 92.06    |
| 10.0E-6                                            |                        | 127.00   |
| <b>METHYLATROPINE NITRATE</b>                      |                        |          |
| 10.0E-9                                            |                        | 92.05    |
| 100.0E-9                                           |                        | 100.49   |
| 1.0E-6                                             |                        | 107.17   |
| 10.0E-6                                            |                        | 128.66   |
| <b>METHYLBENZETHONIUM CHLORIDE</b>                 |                        |          |
| 10.0E-9                                            |                        | 75.51    |
| 100.0E-9                                           |                        | 65.05    |
| 1.0E-6                                             |                        | 99.15    |
| 10.0E-6                                            |                        | 72.48    |
| <b>METHYLDOPA</b>                                  |                        |          |
| 10.0E-9                                            |                        | 78.83    |
| 100.0E-9                                           |                        | 115.13   |
| 1.0E-6                                             |                        | 98.21    |
| 10.0E-6                                            |                        | 113.85   |
| <b>METHYLENE BLUE</b>                              |                        |          |
| 10.0E-9                                            |                        | 99.66    |
| 100.0E-9                                           |                        | 73.57    |
| 1.0E-6                                             |                        | 97.74    |
| 10.0E-6                                            |                        | 63.82    |
| <b>METHYLERGONOVINE MALEATE</b>                    |                        |          |
| 10.0E-9                                            |                        | 90.08    |
| 100.0E-9                                           |                        | 73.78    |
| 1.0E-6                                             |                        | 85.29    |
| 10.0E-6                                            |                        | 110.80   |
| <b>METHYLPHENIDATE HYDROCHLORIDE</b>               |                        |          |
| 10.0E-9                                            |                        | 77.89    |
| 100.0E-9                                           |                        | 68.82    |
| 1.0E-6                                             |                        | 77.04    |
| 10.0E-6                                            |                        | 92.22    |
| <b>METHYLPREDNISOLONE</b>                          |                        |          |
| 10.0E-9                                            |                        | 129.85   |
| 100.0E-9                                           |                        | 115.29   |
| 1.0E-6                                             |                        | 106.35   |
| 10.0E-6                                            |                        | 80.73    |
| <b>METHYLPREDNISOLONE SODIUM SUCCINATE</b>         |                        |          |
| 10.0E-9                                            |                        | 97.49    |
| 100.0E-9                                           |                        | 110.72   |
| 1.0E-6                                             |                        | 117.13   |
| 10.0E-6                                            |                        | 122.48   |
| <b>METHYLTHIOURACIL</b>                            |                        |          |
| 10.0E-9                                            |                        | 113.40   |
| 100.0E-9                                           |                        | 122.28   |
| 1.0E-6                                             |                        | 105.29   |
| 10.0E-6                                            |                        | 89.77    |
| <b>METHYLXANTHOXYLIN</b>                           |                        |          |
| 10.0E-9                                            |                        | 109.30   |
| 100.0E-9                                           |                        | 109.25   |
| 1.0E-6                                             |                        | 100.02   |
| 10.0E-6                                            |                        | 86.53    |
| <b>METHYSERGIDE MALEATE</b>                        |                        |          |
| 10.0E-9                                            |                        | 109.00   |
| 100.0E-9                                           |                        | 155.32   |
| 1.0E-6                                             |                        | 91.22    |
| 10.0E-6                                            |                        | 133.48   |
| <b>METICRANE</b>                                   |                        |          |
| 10.0E-9                                            |                        | 108.40   |
| 100.0E-9                                           |                        | 151.09   |
| 1.0E-6                                             |                        | 98.62    |
| 10.0E-6                                            |                        | 92.47    |

| Compounds and Final Concentrations (M) | Average of % Viability | Hits (✓) |
|----------------------------------------|------------------------|----------|
| <b>METITEPINE MALEATE</b>              |                        |          |
| 10.0E-9                                |                        | 126.72   |
| 100.0E-9                               |                        | 70.96    |
| 1.0E-6                                 |                        | 130.99   |
| 10.0E-6                                |                        | 66.05    |
| <b>METOCLOPRAMIDE HYDROCHLORIDE</b>    |                        |          |
| 10.0E-9                                |                        | 74.84    |
| 100.0E-9                               |                        | 113.19   |
| 1.0E-6                                 |                        | 77.68    |
| 10.0E-6                                |                        | 136.62   |
| <b>METOLAZONE</b>                      |                        |          |
| 10.0E-9                                |                        | 86.19    |
| 100.0E-9                               |                        | 129.70   |
| 1.0E-6                                 |                        | 87.46    |
| 10.0E-6                                |                        | 73.49    |
| <b>METOPROLOL TARTRATE</b>             |                        |          |
| 10.0E-9                                |                        | 102.90   |
| 100.0E-9                               |                        | 107.50   |
| 1.0E-6                                 |                        | 122.62   |
| 10.0E-6                                |                        | 91.10    |
| <b>METRONIDAZOLE</b>                   |                        |          |
| 10.0E-9                                |                        | 77.39    |
| 100.0E-9                               |                        | 93.02    |
| 1.0E-6                                 |                        | 78.35    |
| 10.0E-6                                |                        | 103.49   |
| <b>MEVALONIC ACID LACTONE</b>          |                        |          |
| 10.0E-9                                |                        | 105.31   |
| 100.0E-9                               |                        | 84.48    |
| 1.0E-6                                 |                        | 112.85   |
| 10.0E-6                                |                        | 100.36   |
| <b>MEVASTATIN</b>                      |                        |          |
| 10.0E-9                                |                        | 91.88    |
| 100.0E-9                               |                        | 104.66   |
| 1.0E-6                                 |                        | 98.28    |
| 10.0E-6                                |                        | 110.16   |
| <b>MEXAMINE</b>                        |                        |          |
| 10.0E-9                                |                        | 117.52   |
| 100.0E-9                               |                        | 97.36    |
| 1.0E-6                                 |                        | 82.64    |
| 10.0E-6                                |                        | 136.32   |
| <b>MEXICANOLIDE</b>                    |                        |          |
| 10.0E-9                                |                        | 108.28   |
| 100.0E-9                               |                        | 125.29   |
| 1.0E-6                                 |                        | 108.94   |
| 10.0E-6                                |                        | 102.83   |
| <b>MEXILETINE HYDROCHLORIDE</b>        |                        |          |
| 10.0E-9                                |                        | 85.58    |
| 100.0E-9                               |                        | 122.15   |
| 1.0E-6                                 |                        | 109.55   |
| 10.0E-6                                |                        | 52.06    |
| <b>MICONAZOLE NITRATE</b>              |                        |          |
| 10.0E-9                                |                        | 107.20   |
| 100.0E-9                               |                        | 100.25   |
| 1.0E-6                                 |                        | 88.60    |
| 10.0E-6                                |                        | 48.73    |
| <b>MIDODRINE HYDROCHLORIDE</b>         |                        |          |
| 10.0E-9                                |                        | 96.55    |
| 100.0E-9                               |                        | 112.55   |
| 1.0E-6                                 |                        | 105.85   |
| 10.0E-6                                |                        | 92.14    |
| <b>MIGLITOL</b>                        |                        |          |
| 10.0E-9                                |                        | 107.28   |
| 100.0E-9                               |                        | 101.49   |
| 1.0E-6                                 |                        | 102.77   |
| 10.0E-6                                |                        | 81.10    |
| <b>MIMOSINE</b>                        |                        |          |
| 10.0E-9                                |                        | 85.67    |
| 100.0E-9                               |                        | 78.99    |
| 1.0E-6                                 |                        | 124.03   |
| 10.0E-6                                |                        | 108.36   |
| <b>MINAPRINE HYDROCHLORIDE</b>         |                        |          |
| 10.0E-9                                |                        | 98.94    |
| 100.0E-9                               |                        | 91.62    |
| 1.0E-6                                 |                        | 84.35    |
| 10.0E-6                                |                        | 99.35    |
| <b>MINOCYCLINE HYDROCHLORIDE</b>       |                        |          |
| 10.0E-9                                |                        | 89.31    |
| 100.0E-9                               |                        | 119.18   |
| 1.0E-6                                 |                        | 75.28    |
| 10.0E-6                                |                        | 83.87    |
| <b>MINOXIDIL</b>                       |                        |          |
| 10.0E-9                                |                        | 89.53    |
| 100.0E-9                               |                        | 51.50    |
| 1.0E-6                                 |                        | 21.28    |
| 10.0E-6                                |                        | 124.14   |

| Compounds and Final Concentrations (M)       | Average of % Viability | Hits (✓) |
|----------------------------------------------|------------------------|----------|
| <b>MITOMYCIN C</b>                           |                        | ✓        |
| 10.0E-9                                      | 95.50                  |          |
| 100.0E-9                                     | 83.83                  |          |
| 1.0E-6                                       | 71.28                  |          |
| 10.0E-6                                      | 4.30                   |          |
| <b>MITOTANE</b>                              |                        |          |
| 10.0E-9                                      | 95.83                  |          |
| 100.0E-9                                     | 87.34                  |          |
| 1.0E-6                                       | 86.48                  |          |
| 10.0E-6                                      | 100.34                 |          |
| <b>MITOXANTRONE HYDROCHLORIDE</b>            |                        |          |
| 10.0E-9                                      | 104.11                 |          |
| 100.0E-9                                     | 85.47                  |          |
| 1.0E-6                                       | 48.29                  |          |
| 10.0E-6                                      | 50.32                  |          |
| <b>MODAFINIL</b>                             |                        |          |
| 10.0E-9                                      | 119.47                 |          |
| 100.0E-9                                     | 120.73                 |          |
| 1.0E-6                                       | 102.21                 |          |
| 10.0E-6                                      | 86.97                  |          |
| <b>MOLSIDOMINE</b>                           |                        |          |
| 10.0E-9                                      | 70.06                  |          |
| 100.0E-9                                     | 110.29                 |          |
| 1.0E-6                                       | 80.92                  |          |
| 10.0E-6                                      | 140.42                 |          |
| <b>MONENSIN SODIUM (monensin A is shown)</b> |                        |          |
| 10.0E-9                                      | 99.47                  |          |
| 100.0E-9                                     | 88.79                  |          |
| 1.0E-6                                       | 85.31                  |          |
| 10.0E-6                                      | 24.65                  |          |
| <b>MONOBENZONE</b>                           |                        |          |
| 10.0E-9                                      | 105.08                 |          |
| 100.0E-9                                     | 108.82                 |          |
| 1.0E-6                                       | 109.84                 |          |
| 10.0E-6                                      | 84.09                  |          |
| <b>MONOCROTALINE</b>                         |                        |          |
| 10.0E-9                                      | 89.17                  |          |
| 100.0E-9                                     | 100.36                 |          |
| 1.0E-6                                       | 119.48                 |          |
| 10.0E-6                                      | 117.17                 |          |
| <b>MONTELUKAST SODIUM</b>                    |                        |          |
| 10.0E-9                                      | 81.91                  |          |
| 100.0E-9                                     | 85.55                  |          |
| 1.0E-6                                       | 93.33                  |          |
| 10.0E-6                                      | 104.68                 |          |
| <b>MORANTEL CITRATE</b>                      |                        |          |
| 10.0E-9                                      | 101.32                 |          |
| 100.0E-9                                     | 100.64                 |          |
| 1.0E-6                                       | 98.98                  |          |
| 10.0E-6                                      | 108.44                 |          |
| <b>MORIN</b>                                 |                        |          |
| 10.0E-9                                      | 103.18                 |          |
| 100.0E-9                                     | 98.70                  |          |
| 1.0E-6                                       | 101.04                 |          |
| 10.0E-6                                      | 96.89                  |          |
| <b>MOROXYDINE HYDROCHLORIDE</b>              |                        |          |
| 10.0E-9                                      | 111.03                 |          |
| 100.0E-9                                     | 107.78                 |          |
| 1.0E-6                                       | 117.29                 |          |
| 10.0E-6                                      | 40.33                  |          |
| <b>MOXALACTAM DISODIUM</b>                   |                        |          |
| 10.0E-9                                      | 70.32                  |          |
| 100.0E-9                                     | 181.08                 |          |
| 1.0E-6                                       | 100.88                 |          |
| 10.0E-6                                      | 127.32                 |          |
| <b>MOXIFLOXACIN HYDROCHLORIDE</b>            |                        |          |
| 10.0E-9                                      | 92.70                  |          |
| 100.0E-9                                     | 105.13                 |          |
| 1.0E-6                                       | 105.15                 |          |
| 10.0E-6                                      | 103.65                 |          |
| <b>MOXISYLYTE HYDROCHLORIDE</b>              |                        | ✓        |
| 10.0E-9                                      | 91.79                  |          |
| 100.0E-9                                     | 116.20                 |          |
| 1.0E-6                                       | 103.46                 |          |
| 10.0E-6                                      | 141.77                 |          |
| <b>MUNDOSERONE</b>                           |                        |          |
| 10.0E-9                                      | 104.45                 |          |
| 100.0E-9                                     | 95.12                  |          |
| 1.0E-6                                       | 93.94                  |          |
| 10.0E-6                                      | 79.44                  |          |
| <b>MUNDULONE</b>                             |                        |          |
| 10.0E-9                                      | 120.85                 |          |
| 100.0E-9                                     | 89.24                  |          |
| 1.0E-6                                       | 98.27                  |          |
| 10.0E-6                                      | 69.83                  |          |

| Compounds and Final Concentrations (M)           | Average of % Viability | Hits (✓) |
|--------------------------------------------------|------------------------|----------|
| <b>MUNDULONE ACETATE</b>                         |                        |          |
| 10.0E-9                                          |                        | 78.45    |
| 100.0E-9                                         |                        | 95.66    |
| 1.0E-6                                           |                        | 89.60    |
| 10.0E-6                                          |                        | 77.51    |
| <b>MUPIROCIN</b>                                 |                        |          |
| 10.0E-9                                          |                        | 55.51    |
| 100.0E-9                                         |                        | 95.18    |
| 1.0E-6                                           |                        | 132.83   |
| 10.0E-6                                          |                        | 74.90    |
| <b>MUUROLLADIE-3-ONE</b>                         |                        |          |
| 10.0E-9                                          |                        | 107.46   |
| 100.0E-9                                         |                        | 99.68    |
| 1.0E-6                                           |                        | 82.32    |
| 10.0E-6                                          |                        | 110.52   |
| <b>MYCOPHENOLATE MOFETIL</b>                     |                        |          |
| 10.0E-9                                          |                        | 109.75   |
| 100.0E-9                                         |                        | 92.84    |
| 1.0E-6                                           |                        | 91.82    |
| 10.0E-6                                          |                        | 100.38   |
| <b>MYCOPHENOLIC ACID</b>                         |                        |          |
| 10.0E-9                                          |                        | 109.45   |
| 100.0E-9                                         |                        | 115.53   |
| 1.0E-6                                           |                        | 116.03   |
| 10.0E-6                                          |                        | 72.09    |
| <b>MYOSMINE</b>                                  |                        |          |
| 10.0E-9                                          |                        | 122.46   |
| 100.0E-9                                         |                        | 111.93   |
| 1.0E-6                                           |                        | 112.49   |
| 10.0E-6                                          |                        | 105.74   |
| <b>MYRICETIN</b>                                 |                        |          |
| 10.0E-9                                          |                        | 108.07   |
| 100.0E-9                                         |                        | 96.87    |
| 1.0E-6                                           |                        | 122.92   |
| 10.0E-6                                          |                        | 63.40    |
| <b>N- (9-FLUORENYLMETHOXYCARBONYL)-L-LEUCINE</b> |                        |          |
| 10.0E-9                                          |                        | 122.59   |
| 100.0E-9                                         |                        | 95.19    |
| 1.0E-6                                           |                        | 105.11   |
| 10.0E-6                                          |                        | 104.73   |
| <b>N,N-HEXAMETHYLENEAMILORIDE</b>                |                        |          |
| 10.0E-9                                          |                        | 88.58    |
| 100.0E-9                                         |                        | 93.73    |
| 1.0E-6                                           |                        | 94.49    |
| 10.0E-6                                          |                        | 108.00   |
| <b>NABUMETONE</b>                                |                        |          |
| 10.0E-9                                          |                        | 100.78   |
| 100.0E-9                                         |                        | 118.59   |
| 1.0E-6                                           |                        | 111.40   |
| 10.0E-6                                          |                        | 109.19   |
| <b>N-ACETYLMURAMIC ACID</b>                      |                        |          |
| 10.0E-9                                          |                        | 89.66    |
| 100.0E-9                                         |                        | 106.56   |
| 1.0E-6                                           |                        | 100.34   |
| 10.0E-6                                          |                        | 79.33    |
| <b>N-ACETYLNEURAMIC ACID</b>                     |                        |          |
| 10.0E-9                                          |                        | 96.44    |
| 100.0E-9                                         |                        | 138.59   |
| 1.0E-6                                           |                        | 122.73   |
| 10.0E-6                                          |                        | 92.67    |
| <b>N-ACETYLPROLINE</b>                           |                        |          |
| 10.0E-9                                          |                        | 104.43   |
| 100.0E-9                                         |                        | 82.56    |
| 1.0E-6                                           |                        | 112.04   |
| 10.0E-6                                          |                        | 114.60   |
| <b>NADIDE</b>                                    |                        |          |
| 10.0E-9                                          |                        | 111.19   |
| 100.0E-9                                         |                        | 92.84    |
| 1.0E-6                                           |                        | 102.35   |
| 10.0E-6                                          |                        | 89.03    |
| <b>NADOLOL</b>                                   |                        |          |
| 10.0E-9                                          |                        | 93.79    |
| 100.0E-9                                         |                        | 156.85   |
| 1.0E-6                                           |                        | 113.70   |
| 10.0E-6                                          |                        | 114.85   |
| <b>NAFCILLIN SODIUM</b>                          |                        |          |
| 10.0E-9                                          |                        | 109.42   |
| 100.0E-9                                         |                        | 112.49   |
| 1.0E-6                                           |                        | 126.35   |
| 10.0E-6                                          |                        | 105.54   |
| <b>NAFRONYL OXALATE</b>                          |                        |          |
| 10.0E-9                                          |                        | 103.78   |
| 100.0E-9                                         |                        | 119.12   |
| 1.0E-6                                           |                        | 103.38   |
| 10.0E-6                                          |                        | 99.07    |



| Compounds and Final Concentrations (M) | Average of % Viability | Hits (✓) |
|----------------------------------------|------------------------|----------|
| <b>NAFTOPIDIL DIHYDROCHLORIDE</b>      |                        |          |
| 10.0E-9                                |                        | 80.68    |
| 100.0E-9                               |                        | 128.88   |
| 1.0E-6                                 |                        | 116.18   |
| 10.0E-6                                |                        | 91.59    |
| <b>NALBUPHINE HYDROCHLORIDE</b>        |                        |          |
| 10.0E-9                                |                        | 64.58    |
| 100.0E-9                               |                        | 95.04    |
| 1.0E-6                                 |                        | 108.35   |
| 10.0E-6                                |                        | 99.41    |
| <b>NALIDIXIC ACID</b>                  |                        |          |
| 10.0E-9                                |                        | 142.11   |
| 100.0E-9                               |                        | 102.80   |
| 1.0E-6                                 |                        | 89.63    |
| 10.0E-6                                |                        | 109.51   |
| <b>NALOXONE HYDROCHLORIDE</b>          |                        |          |
| 10.0E-9                                |                        | 140.36   |
| 100.0E-9                               |                        | 138.34   |
| 1.0E-6                                 |                        | 106.88   |
| 10.0E-6                                |                        | 98.30    |
| <b>NALTREXONE HYDROCHLORIDE</b>        |                        |          |
| 10.0E-9                                |                        | 108.02   |
| 100.0E-9                               |                        | 122.04   |
| 1.0E-6                                 |                        | 115.46   |
| 10.0E-6                                |                        | 101.95   |
| <b>NAPHAZOLINE HYDROCHLORIDE</b>       |                        |          |
| 10.0E-9                                |                        | 83.13    |
| 100.0E-9                               |                        | 102.97   |
| 1.0E-6                                 |                        | 100.22   |
| 10.0E-6                                |                        | 130.38   |
| <b>NAPROXEN(+)</b>                     |                        |          |
| 10.0E-9                                |                        | 61.38    |
| 100.0E-9                               |                        | 115.06   |
| 1.0E-6                                 |                        | 73.15    |
| 10.0E-6                                |                        | 121.07   |
| <b>NAPROXOL</b>                        |                        |          |
| 10.0E-9                                |                        | 126.78   |
| 100.0E-9                               |                        | 136.27   |
| 1.0E-6                                 |                        | 115.20   |
| 10.0E-6                                |                        | 91.94    |
| <b>NARINGENIN</b>                      |                        |          |
| 10.0E-9                                |                        | 89.96    |
| 100.0E-9                               |                        | 88.77    |
| 1.0E-6                                 |                        | 66.51    |
| 10.0E-6                                |                        | 108.49   |
| <b>NARINGIN</b>                        |                        |          |
| 10.0E-9                                |                        | 104.51   |
| 100.0E-9                               |                        | 97.38    |
| 1.0E-6                                 |                        | 107.06   |
| 10.0E-6                                |                        | 139.75   |
| <b>NATAMYCIN</b>                       |                        |          |
| 10.0E-9                                |                        | 119.43   |
| 100.0E-9                               |                        | 98.02    |
| 1.0E-6                                 |                        | 100.39   |
| 10.0E-6                                |                        | 80.91    |
| <b>NATEGLINIDE</b>                     |                        |          |
| 10.0E-9                                |                        | 124.44   |
| 100.0E-9                               |                        | 105.82   |
| 1.0E-6                                 |                        | 86.08    |
| 10.0E-6                                |                        | 103.51   |
| <b>NEFOPAM</b>                         |                        |          |
| 10.0E-9                                |                        | 94.61    |
| 100.0E-9                               |                        | 126.19   |
| 1.0E-6                                 |                        | 79.15    |
| 10.0E-6                                |                        | 107.63   |
| <b>NEOMYCIN SULFATE</b>                |                        |          |
| 10.0E-9                                |                        | 77.14    |
| 100.0E-9                               |                        | 115.41   |
| 1.0E-6                                 |                        | 86.20    |
| 10.0E-6                                |                        | 102.48   |
| <b>NEOSTIGMINE BROMIDE</b>             |                        |          |
| 10.0E-9                                |                        | 128.53   |
| 100.0E-9                               |                        | 157.03   |
| 1.0E-6                                 |                        | 103.15   |
| 10.0E-6                                |                        | 85.98    |
| <b>NEROL</b>                           |                        |          |
| 10.0E-9                                |                        | 111.31   |
| 100.0E-9                               |                        | 116.35   |
| 1.0E-6                                 |                        | 82.80    |
| 10.0E-6                                |                        | 65.15    |
| <b>NETILMICIN SULFATE</b>              |                        |          |
| 10.0E-9                                |                        | 96.82    |
| 100.0E-9                               |                        | 76.43    |
| 1.0E-6                                 |                        | 124.80   |
| 10.0E-6                                |                        | 118.37   |

| Compounds and Final Concentrations (M) | Average of % Viability | Hits (✓) |
|----------------------------------------|------------------------|----------|
| <b>Row Labels</b>                      |                        |          |
| <b>NIACIN</b>                          |                        |          |
| 10.0E-9                                |                        | 81.81    |
| 100.0E-9                               |                        | 96.48    |
| 1.0E-6                                 |                        | 73.55    |
| 10.0E-6                                |                        | 111.68   |
| <b>NIACINAMIDE</b>                     |                        |          |
| 10.0E-9                                |                        | 117.93   |
| 100.0E-9                               |                        | 138.55   |
| 1.0E-6                                 |                        | 115.55   |
| 10.0E-6                                |                        | 96.31    |
| <b>NIALAMIDE</b>                       |                        |          |
| 10.0E-9                                |                        | 136.91   |
| 100.0E-9                               |                        | 125.94   |
| 1.0E-6                                 |                        | 130.62   |
| 10.0E-6                                |                        | 187.61   |
| <b>NICARDIPINE HYDROCHLORIDE</b>       |                        |          |
| 10.0E-9                                |                        | 78.27    |
| 100.0E-9                               |                        | 112.51   |
| 1.0E-6                                 |                        | 105.42   |
| 10.0E-6                                |                        | 91.05    |
| <b>NICERGOLINE</b>                     |                        |          |
| 10.0E-9                                |                        | 100.34   |
| 100.0E-9                               |                        | 100.90   |
| 1.0E-6                                 |                        | 137.15   |
| 10.0E-6                                |                        | 105.24   |
| <b>NICLOSAMIDE</b>                     |                        |          |
| 10.0E-9                                |                        | 105.63   |
| 100.0E-9                               |                        | 96.90    |
| 1.0E-6                                 |                        | 87.60    |
| 10.0E-6                                |                        | 140.41   |
| <b>NICOTINE DITARTRATE</b>             |                        |          |
| 10.0E-9                                |                        | 88.89    |
| 100.0E-9                               |                        | 125.49   |
| 1.0E-6                                 |                        | 105.00   |
| 10.0E-6                                |                        | 113.27   |
| <b>NICOTINYL ALCOHOL TARTRATE</b>      |                        |          |
| 10.0E-9                                |                        | 72.57    |
| 100.0E-9                               |                        | 128.91   |
| 1.0E-6                                 |                        | 84.78    |
| 10.0E-6                                |                        | 129.92   |
| <b>NIFEDIPINE</b>                      |                        |          |
| 10.0E-9                                |                        | 74.63    |
| 100.0E-9                               |                        | 167.00   |
| 1.0E-6                                 |                        | 77.42    |
| 10.0E-6                                |                        | 63.20    |
| <b>NIFENAZONE</b>                      |                        |          |
| 10.0E-9                                |                        | 101.85   |
| 100.0E-9                               |                        | 86.57    |
| 1.0E-6                                 |                        | 92.42    |
| 10.0E-6                                |                        | 118.17   |
| <b>NIFLUMIC ACID</b>                   |                        |          |
| 10.0E-9                                |                        | 138.61   |
| 100.0E-9                               |                        | 115.24   |
| 1.0E-6                                 |                        | 102.95   |
| 10.0E-6                                |                        | 43.81    |
| <b>NIFUROXAZIDE</b>                    |                        |          |
| 10.0E-9                                |                        | 108.28   |
| 100.0E-9                               |                        | 122.41   |
| 1.0E-6                                 |                        | 132.37   |
| 10.0E-6                                |                        | 59.31    |
| <b>NILUTAMIDE</b>                      |                        |          |
| 10.0E-9                                |                        | 169.51   |
| 100.0E-9                               |                        | 100.82   |
| 1.0E-6                                 |                        | 94.22    |
| 10.0E-6                                |                        | 111.84   |
| <b>NIMESULIDE</b>                      |                        |          |
| 10.0E-9                                |                        | 111.04   |
| 100.0E-9                               |                        | 135.05   |
| 1.0E-6                                 |                        | 120.57   |
| 10.0E-6                                |                        | 118.62   |
| <b>NIMODIPINE</b>                      |                        |          |
| 10.0E-9                                |                        | 109.29   |
| 100.0E-9                               |                        | 122.68   |
| 1.0E-6                                 |                        | 124.36   |
| 10.0E-6                                |                        | 120.66   |
| <b>NIMUSTINE</b>                       |                        |          |
| 10.0E-9                                |                        | 118.41   |
| 100.0E-9                               |                        | 85.24    |
| 1.0E-6                                 |                        | 124.08   |
| 10.0E-6                                |                        | 36.45    |
| <b>NIPECOTIC ACID</b>                  |                        |          |
| 10.0E-9                                |                        | 118.44   |
| 100.0E-9                               |                        | 179.65   |
| 1.0E-6                                 |                        | 110.83   |
| 10.0E-6                                |                        | 125.78   |

| Compounds and Final Concentrations (M)   | Average of % Viability | Hits (✓) |
|------------------------------------------|------------------------|----------|
| <b>NISOLDIPINE</b>                       |                        |          |
| 10.0E-9                                  |                        | 91.59    |
| 100.0E-9                                 |                        | 95.51    |
| 1.0E-6                                   |                        | 89.19    |
| 10.0E-6                                  |                        | 82.53    |
| <b>NITHIAMIDE</b>                        |                        |          |
| 10.0E-9                                  |                        | 103.43   |
| 100.0E-9                                 |                        | 97.49    |
| 1.0E-6                                   |                        | 100.21   |
| 10.0E-6                                  |                        | 149.15   |
| <b>NITRENDIPINE</b>                      |                        |          |
| 10.0E-9                                  |                        | 74.96    |
| 100.0E-9                                 |                        | 131.45   |
| 1.0E-6                                   |                        | 123.39   |
| 10.0E-6                                  |                        | 84.98    |
| <b>NITROFURANTOIN</b>                    |                        |          |
| 10.0E-9                                  |                        | 61.37    |
| 100.0E-9                                 |                        | 94.66    |
| 1.0E-6                                   |                        | 109.42   |
| 10.0E-6                                  |                        | 92.10    |
| <b>NITROFURAZONE</b>                     |                        |          |
| 10.0E-9                                  |                        | 100.61   |
| 100.0E-9                                 |                        | 125.25   |
| 1.0E-6                                   |                        | 111.89   |
| 10.0E-6                                  |                        | 116.10   |
| <b>NITROMIDE</b>                         |                        |          |
| 10.0E-9                                  |                        | 116.50   |
| 100.0E-9                                 |                        | 116.38   |
| 1.0E-6                                   |                        | 80.09    |
| 10.0E-6                                  |                        | 128.68   |
| <b>NIZATIDINE</b>                        |                        |          |
| 10.0E-9                                  |                        | 110.14   |
| 100.0E-9                                 |                        | 115.04   |
| 1.0E-6                                   |                        | 91.91    |
| 10.0E-6                                  |                        | 140.35   |
| <b>N-METHYLANTHRANILIC ACID</b>          |                        |          |
| 10.0E-9                                  |                        | 118.98   |
| 100.0E-9                                 |                        | 98.93    |
| 1.0E-6                                   |                        | 106.97   |
| 10.0E-6                                  |                        | 110.29   |
| <b>N-METHYLBENZYLAMINE HYDROCHLORIDE</b> |                        |          |
| 10.0E-9                                  |                        | 75.53    |
| 100.0E-9                                 |                        | 99.93    |
| 1.0E-6                                   |                        | 86.07    |
| 10.0E-6                                  |                        | 97.54    |
| <b>N-METHYL-D-ASPARTIC ACID (NMDA)</b>   |                        |          |
| 10.0E-9                                  |                        | 89.28    |
| 100.0E-9                                 |                        | 82.51    |
| 1.0E-6                                   |                        | 86.67    |
| 10.0E-6                                  |                        | 66.05    |
| <b>N-METHYLSOLEUCINE</b>                 |                        |          |
| 10.0E-9                                  |                        | 119.94   |
| 100.0E-9                                 |                        | 124.18   |
| 1.0E-6                                   |                        | 101.02   |
| 10.0E-6                                  |                        | 124.61   |
| <b>NOBILETIN</b>                         |                        |          |
| 10.0E-9                                  |                        | 121.59   |
| 100.0E-9                                 |                        | 116.60   |
| 1.0E-6                                   |                        | 142.24   |
| 10.0E-6                                  |                        | 94.16    |
| <b>NOCODAZOLE</b>                        |                        |          |
| 10.0E-9                                  |                        | 95.38    |
| 100.0E-9                                 |                        | 109.72   |
| 1.0E-6                                   |                        | 94.39    |
| 10.0E-6                                  |                        | 49.18    |
| <b>NOMIFENSINE MALEATE</b>               |                        |          |
| 10.0E-9                                  |                        | 93.86    |
| 100.0E-9                                 |                        | 104.27   |
| 1.0E-6                                   |                        | 101.62   |
| 10.0E-6                                  |                        | 93.92    |
| <b>NONIC ACID</b>                        |                        |          |
| 10.0E-9                                  |                        | 71.65    |
| 100.0E-9                                 |                        | 86.27    |
| 1.0E-6                                   |                        | 107.87   |
| 10.0E-6                                  |                        | 110.29   |
| <b>NONOXYNOL-9</b>                       |                        |          |
| 10.0E-9                                  |                        | 76.03    |
| 100.0E-9                                 |                        | 108.42   |
| 1.0E-6                                   |                        | 101.52   |
| 10.0E-6                                  |                        | 94.93    |
| <b>NORCANTHARIDIN</b>                    |                        |          |
| 10.0E-9                                  |                        | 107.25   |
| 100.0E-9                                 |                        | 77.09    |
| 1.0E-6                                   |                        | 114.05   |
| 10.0E-6                                  |                        | 17.73    |

| Compounds and Final Concentrations (M) | Average of % Viability | Hits (✓) |
|----------------------------------------|------------------------|----------|
| <b>NOREPINEPHRINE</b>                  |                        |          |
| 10.0E-9                                |                        | 122.23   |
| 100.0E-9                               |                        | 142.41   |
| 1.0E-6                                 |                        | 91.15    |
| 10.0E-6                                |                        | 139.64   |
| <b>NORETHINDRONE</b>                   |                        |          |
| 10.0E-9                                |                        | 139.80   |
| 100.0E-9                               |                        | 77.44    |
| 1.0E-6                                 |                        | 91.95    |
| 10.0E-6                                |                        | 76.60    |
| <b>NORETHINDRONE ACETATE</b>           |                        |          |
| 10.0E-9                                |                        | 42.15    |
| 100.0E-9                               |                        | 100.03   |
| 1.0E-6                                 |                        | 83.42    |
| 10.0E-6                                |                        | 105.77   |
| <b>NORETHYNODREL</b>                   |                        |          |
| 10.0E-9                                |                        | 104.68   |
| 100.0E-9                               |                        | 131.91   |
| 1.0E-6                                 |                        | 94.35    |
| 10.0E-6                                |                        | 80.75    |
| <b>NORFLOXACIN</b>                     |                        |          |
| 10.0E-9                                |                        | 89.53    |
| 100.0E-9                               |                        | 140.82   |
| 1.0E-6                                 |                        | 71.55    |
| 10.0E-6                                |                        | 91.13    |
| <b>NORGESTIMATE</b>                    |                        |          |
| 10.0E-9                                |                        | 113.07   |
| 100.0E-9                               |                        | 109.45   |
| 1.0E-6                                 |                        | 101.00   |
| 10.0E-6                                |                        | 111.13   |
| <b>NORGESTREL</b>                      |                        |          |
| 10.0E-9                                |                        | 111.08   |
| 100.0E-9                               |                        | 111.53   |
| 1.0E-6                                 |                        | 95.68    |
| 10.0E-6                                |                        | 102.47   |
| <b>NORHARMAN</b>                       |                        |          |
| 10.0E-9                                |                        | 65.26    |
| 100.0E-9                               |                        | 92.37    |
| 1.0E-6                                 |                        | 106.85   |
| 10.0E-6                                |                        | 106.51   |
| <b>NORSTICTIC ACID</b>                 |                        |          |
| 10.0E-9                                |                        | 79.72    |
| 100.0E-9                               |                        | 123.43   |
| 1.0E-6                                 |                        | 88.76    |
| 10.0E-6                                |                        | 105.72   |
| <b>NORSTICTIC ACID PENTAACETATE</b>    |                        |          |
| 10.0E-9                                |                        | 92.96    |
| 100.0E-9                               |                        | 77.77    |
| 1.0E-6                                 |                        | 94.69    |
| 10.0E-6                                |                        | 101.33   |
| <b>NORTRIPTYLINE</b>                   |                        |          |
| 10.0E-9                                |                        | 124.78   |
| 100.0E-9                               |                        | 101.42   |
| 1.0E-6                                 |                        | 92.75    |
| 10.0E-6                                |                        | 66.25    |
| <b>NOSCAPINE HYDROCHLORIDE</b>         |                        |          |
| 10.0E-9                                |                        | 80.37    |
| 100.0E-9                               |                        | 81.89    |
| 1.0E-6                                 |                        | 112.48   |
| 10.0E-6                                |                        | 96.27    |
| <b>NOVOBIOCIN SODIUM</b>               |                        |          |
| 10.0E-9                                |                        | 64.79    |
| 100.0E-9                               |                        | 120.40   |
| 1.0E-6                                 |                        | 85.68    |
| 10.0E-6                                |                        | 92.14    |
| <b>N-PHENYLANTHRANILIC ACID</b>        |                        |          |
| 10.0E-9                                |                        | 110.02   |
| 100.0E-9                               |                        | 88.75    |
| 1.0E-6                                 |                        | 83.20    |
| 10.0E-6                                |                        | 83.51    |
| <b>NYLIDRIN HYDROCHLORIDE</b>          |                        |          |
| 10.0E-9                                |                        | 98.16    |
| 100.0E-9                               |                        | 100.39   |
| 1.0E-6                                 |                        | 75.28    |
| 10.0E-6                                |                        | 113.81   |
| <b>NYSTATIN</b>                        |                        |          |
| 10.0E-9                                |                        | 87.23    |
| 100.0E-9                               |                        | 145.59   |
| 1.0E-6                                 |                        | 109.15   |
| 10.0E-6                                |                        | 97.31    |
| <b>O-BENZYL-L-SERINE</b>               |                        |          |
| 10.0E-9                                |                        | 106.78   |
| 100.0E-9                               |                        | 89.14    |
| 1.0E-6                                 |                        | 145.40   |
| 10.0E-6                                |                        | 129.91   |

| Compounds and Final Concentrations (M) | Average of % Viability | Hits (✓) |
|----------------------------------------|------------------------|----------|
| <b>OBLIQUIN</b>                        |                        |          |
| 10.0E-9                                |                        | 83.15    |
| 100.0E-9                               |                        | 129.55   |
| 1.0E-6                                 |                        | 113.50   |
| 10.0E-6                                |                        | 81.02    |
| <b>OBTUSAQUINONE</b>                   |                        |          |
| 10.0E-9                                |                        | 106.40   |
| 100.0E-9                               |                        | 114.89   |
| 1.0E-6                                 |                        | 81.49    |
| 10.0E-6                                |                        | 65.75    |
| <b>OCTISALATE</b>                      |                        |          |
| 10.0E-9                                |                        | 87.08    |
| 100.0E-9                               |                        | 79.40    |
| 1.0E-6                                 |                        | 88.85    |
| 10.0E-6                                |                        | 95.51    |
| <b>OCTODRINE</b>                       |                        |          |
| 10.0E-9                                |                        | 115.08   |
| 100.0E-9                               |                        | 110.77   |
| 1.0E-6                                 |                        | 127.18   |
| 10.0E-6                                |                        | 90.04    |
| <b>OCTOPAMINE HYDROCHLORIDE</b>        |                        |          |
| 10.0E-9                                |                        | 86.42    |
| 100.0E-9                               |                        | 103.93   |
| 1.0E-6                                 |                        | 105.14   |
| 10.0E-6                                |                        | 103.89   |
| <b>OFLOXACIN</b>                       |                        |          |
| 10.0E-9                                |                        | 97.38    |
| 100.0E-9                               |                        | 112.37   |
| 1.0E-6                                 |                        | 121.69   |
| 10.0E-6                                |                        | 111.73   |
| <b>OLEANOIC ACID</b>                   |                        |          |
| 10.0E-9                                |                        | 133.36   |
| 100.0E-9                               |                        | 105.02   |
| 1.0E-6                                 |                        | 85.09    |
| 10.0E-6                                |                        | 126.41   |
| <b>OLEANOLIC ACID ACETATE</b>          |                        |          |
| 10.0E-9                                |                        | 105.59   |
| 100.0E-9                               |                        | 117.57   |
| 1.0E-6                                 |                        | 131.09   |
| 10.0E-6                                |                        | 142.46   |
| <b>OLMESARTAN MEDOXOMIL</b>            |                        |          |
| 10.0E-9                                |                        | 106.35   |
| 100.0E-9                               |                        | 108.41   |
| 1.0E-6                                 |                        | 93.25    |
| 10.0E-6                                |                        | 110.93   |
| <b>OLSELTAMIVIR PHOSPHATE</b>          |                        |          |
| 10.0E-9                                |                        | 91.71    |
| 100.0E-9                               |                        | 120.36   |
| 1.0E-6                                 |                        | 106.44   |
| 10.0E-6                                |                        | 108.46   |
| <b>OMEGA-3-ACID ESTERS (EPA shown)</b> |                        |          |
| 10.0E-9                                |                        | 126.75   |
| 100.0E-9                               |                        | 104.66   |
| 1.0E-6                                 |                        | 145.56   |
| 10.0E-6                                |                        | 84.28    |
| <b>OMEPRAZOLE</b>                      |                        |          |
| 10.0E-9                                |                        | 112.74   |
| 100.0E-9                               |                        | 89.54    |
| 1.0E-6                                 |                        | 100.62   |
| 10.0E-6                                |                        | 96.25    |
| <b>ONONETIN</b>                        |                        |          |
| 10.0E-9                                |                        | 89.16    |
| 100.0E-9                               |                        | 107.55   |
| 1.0E-6                                 |                        | 104.48   |
| 10.0E-6                                |                        | 96.08    |
| <b>ORBIFLOXACIN</b>                    |                        |          |
| 10.0E-9                                |                        | 128.46   |
| 100.0E-9                               |                        | 123.31   |
| 1.0E-6                                 |                        | 111.09   |
| 10.0E-6                                |                        | 91.79    |
| <b>ORLISTAT</b>                        |                        |          |
| 10.0E-9                                |                        | 92.24    |
| 100.0E-9                               |                        | 104.67   |
| 1.0E-6                                 |                        | 127.01   |
| 10.0E-6                                |                        | 78.77    |
| <b>ORNIDAZOLE</b>                      |                        |          |
| 10.0E-9                                |                        | 103.66   |
| 100.0E-9                               |                        | 121.11   |
| 1.0E-6                                 |                        | 64.28    |
| 10.0E-6                                |                        | 103.36   |
| <b>ORNITHINE</b>                       |                        |          |
| 10.0E-9                                |                        | 103.48   |
| 100.0E-9                               |                        | 111.38   |
| 1.0E-6                                 |                        | 110.70   |
| 10.0E-6                                |                        | 113.78   |

| Compounds and Final Concentrations (M) | Average of % Viability | Hits (✓) |
|----------------------------------------|------------------------|----------|
| <b>OROTIC ACID</b>                     |                        |          |
| 10.0E-9                                |                        | 109.26   |
| 100.0E-9                               |                        | 66.36    |
| 1.0E-6                                 |                        | 95.60    |
| 10.0E-6                                |                        | 83.86    |
| <b>ORPHENADRINE CITRATE</b>            |                        |          |
| 10.0E-9                                |                        | 114.95   |
| 100.0E-9                               |                        | 128.23   |
| 1.0E-6                                 |                        | 88.48    |
| 10.0E-6                                |                        | 108.68   |
| <b>ORSELLINIC ACID</b>                 |                        |          |
| 10.0E-9                                |                        | 118.93   |
| 100.0E-9                               |                        | 85.94    |
| 1.0E-6                                 |                        | 124.87   |
| 10.0E-6                                |                        | 119.70   |
| <b>ORSELLINIC ACID, ETHYL ESTER</b>    |                        |          |
| 10.0E-9                                |                        | 97.06    |
| 100.0E-9                               |                        | 90.51    |
| 1.0E-6                                 |                        | 153.81   |
| 10.0E-6                                |                        | 90.71    |
| <b>OSAJIN</b>                          |                        |          |
| 10.0E-9                                |                        | 116.98   |
| 100.0E-9                               |                        | 90.49    |
| 1.0E-6                                 |                        | 103.56   |
| 10.0E-6                                |                        | 102.09   |
| <b>OUABAIN</b>                         |                        |          |
| 10.0E-9                                |                        | 71.96    |
| 100.0E-9                               |                        | 108.82   |
| 1.0E-6                                 |                        | 78.28    |
| 10.0E-6                                |                        | 88.41    |
| <b>OXACILLIN SODIUM</b>                |                        |          |
| 10.0E-9                                |                        | 89.99    |
| 100.0E-9                               |                        | 162.63   |
| 1.0E-6                                 |                        | 102.09   |
| 10.0E-6                                |                        | 89.03    |
| <b>OXALAMINE CITRATE</b>               |                        |          |
| 10.0E-9                                |                        | 127.58   |
| 100.0E-9                               |                        | 124.80   |
| 1.0E-6                                 |                        | 95.95    |
| 10.0E-6                                |                        | 106.70   |
| <b>OXANTEL PAMOATE</b>                 |                        |          |
| 10.0E-9                                |                        | 123.94   |
| 100.0E-9                               |                        | 102.89   |
| 1.0E-6                                 |                        | 93.29    |
| 10.0E-6                                |                        | 111.11   |
| <b>OXAPROZIN</b>                       |                        |          |
| 10.0E-9                                |                        | 102.80   |
| 100.0E-9                               |                        | 93.20    |
| 1.0E-6                                 |                        | 95.80    |
| 10.0E-6                                |                        | 121.02   |
| <b>OXCARBAZEPINE</b>                   |                        |          |
| 10.0E-9                                |                        | 107.06   |
| 100.0E-9                               |                        | 124.03   |
| 1.0E-6                                 |                        | 128.51   |
| 10.0E-6                                |                        | 113.11   |
| <b>OXEDRINE</b>                        |                        |          |
| 10.0E-9                                |                        | 107.32   |
| 100.0E-9                               |                        | 141.68   |
| 1.0E-6                                 |                        | 126.39   |
| 10.0E-6                                |                        | 78.15    |
| <b>OXELAIDIN CITRATE</b>               |                        |          |
| 10.0E-9                                |                        | 185.23   |
| 100.0E-9                               |                        | 130.94   |
| 1.0E-6                                 |                        | 108.21   |
| 10.0E-6                                |                        | 115.51   |
| <b>OXETHAZAINE</b>                     |                        |          |
| 10.0E-9                                |                        | 105.26   |
| 100.0E-9                               |                        | 103.37   |
| 1.0E-6                                 |                        | 99.68    |
| 10.0E-6                                |                        | 99.62    |
| <b>OXFENDAZOLE</b>                     |                        |          |
| 10.0E-9                                |                        | 88.19    |
| 100.0E-9                               |                        | 110.05   |
| 1.0E-6                                 |                        | 89.19    |
| 10.0E-6                                |                        | 99.74    |
| <b>OXIBENDAZOLE</b>                    |                        |          |
| 10.0E-9                                |                        | 111.14   |
| 100.0E-9                               |                        | 85.14    |
| 1.0E-6                                 |                        | 106.20   |
| 10.0E-6                                |                        | 43.92    |
| <b>OXICONAZOLE NITRATE</b>             |                        |          |
| 10.0E-9                                |                        | 96.03    |
| 100.0E-9                               |                        | 101.72   |
| 1.0E-6                                 |                        | 109.47   |
| 10.0E-6                                |                        | 59.90    |

| Compounds and Final Concentrations (M)    | Average of % Viability | Hits (✓) |
|-------------------------------------------|------------------------|----------|
| <b>OXIDOPAMINE HYDROCHLORIDE</b>          |                        |          |
| 10.0E-9                                   |                        | 93.56    |
| 100.0E-9                                  |                        | 113.74   |
| 1.0E-6                                    |                        | 111.05   |
| 10.0E-6                                   |                        | 89.77    |
| <b>OXIGLUTATIONE DISODIUM SALT</b>        |                        |          |
| 10.0E-9                                   |                        | 90.79    |
| 100.0E-9                                  |                        | 119.53   |
| 1.0E-6                                    |                        | 132.76   |
| 10.0E-6                                   |                        | 125.73   |
| <b>OXOLINIC ACID</b>                      |                        |          |
| 10.0E-9                                   |                        | 114.94   |
| 100.0E-9                                  |                        | 114.13   |
| 1.0E-6                                    |                        | 73.55    |
| 10.0E-6                                   |                        | 103.57   |
| <b>OXONITINE</b>                          |                        |          |
| 10.0E-9                                   |                        | 74.14    |
| 100.0E-9                                  |                        | 99.40    |
| 1.0E-6                                    |                        | 120.94   |
| 10.0E-6                                   |                        | 84.64    |
| <b>OXYBENZONE</b>                         |                        |          |
| 10.0E-9                                   |                        | 158.03   |
| 100.0E-9                                  |                        | 131.86   |
| 1.0E-6                                    |                        | 110.89   |
| 10.0E-6                                   |                        | 99.43    |
| <b>OXYBUTYNIN CHLORIDE</b>                |                        |          |
| 10.0E-9                                   |                        | 104.89   |
| 100.0E-9                                  |                        | 124.96   |
| 1.0E-6                                    |                        | 81.02    |
| 10.0E-6                                   |                        | 97.29    |
| <b>OXYMETAZOLINE HYDROCHLORIDE</b>        |                        |          |
| 10.0E-9                                   |                        | 101.15   |
| 100.0E-9                                  |                        | 126.98   |
| 1.0E-6                                    |                        | 145.82   |
| 10.0E-6                                   |                        | 117.95   |
| <b>OXYPHENBUTAZONE</b>                    |                        |          |
| 10.0E-9                                   |                        | 99.59    |
| 100.0E-9                                  |                        | 106.87   |
| 1.0E-6                                    |                        | 63.68    |
| 10.0E-6                                   |                        | 134.55   |
| <b>OXYPHENCYCLIMINE HYDROCHLORIDE</b>     |                        |          |
| 10.0E-9                                   |                        | 121.46   |
| 100.0E-9                                  |                        | 126.03   |
| 1.0E-6                                    |                        | 112.08   |
| 10.0E-6                                   |                        | 105.57   |
| <b>OXYPHENONIUM BROMIDE</b>               |                        |          |
| 10.0E-9                                   |                        | 116.66   |
| 100.0E-9                                  |                        | 107.73   |
| 1.0E-6                                    |                        | 97.95    |
| 10.0E-6                                   |                        | 109.59   |
| <b>OXYQUINOLINE HEMISULFATE</b>           |                        |          |
| 10.0E-9                                   |                        | 122.14   |
| 100.0E-9                                  |                        | 103.27   |
| 1.0E-6                                    |                        | 78.54    |
| 10.0E-6                                   |                        | 0.14     |
| <b>OXYTETRACYCLINE</b>                    |                        |          |
| 10.0E-9                                   |                        | 122.77   |
| 100.0E-9                                  |                        | 128.77   |
| 1.0E-6                                    |                        | 124.22   |
| 10.0E-6                                   |                        | 107.66   |
| <b>OXYTHIAMINE CHLORIDE HYDROCHLORIDE</b> |                        |          |
| 10.0E-9                                   |                        | 79.71    |
| 100.0E-9                                  |                        | 106.29   |
| 1.0E-6                                    |                        | 72.85    |
| 10.0E-6                                   |                        | 123.72   |
| <b>PACHYRRHIZIN</b>                       |                        |          |
| 10.0E-9                                   |                        | 92.86    |
| 100.0E-9                                  |                        | 111.48   |
| 1.0E-6                                    |                        | 98.35    |
| 10.0E-6                                   |                        | 111.63   |
| <b>PACLITAXEL</b>                         |                        |          |
| 10.0E-9                                   |                        | 49.61    |
| 100.0E-9                                  |                        | 69.49    |
| 1.0E-6                                    |                        | 80.73    |
| 10.0E-6                                   |                        | 58.87    |
| <b>PAEONOL</b>                            |                        |          |
| 10.0E-9                                   |                        | 114.03   |
| 100.0E-9                                  |                        | 110.26   |
| 1.0E-6                                    |                        | 72.68    |
| 10.0E-6                                   |                        | 130.08   |
| <b>PALMATINE</b>                          |                        |          |
| 10.0E-9                                   |                        | 116.64   |
| 100.0E-9                                  |                        | 118.13   |
| 1.0E-6                                    |                        | 115.99   |
| 10.0E-6                                   |                        | 99.68    |

| Compounds and Final Concentrations (M) | Average of % Viability | Hits (✓) |
|----------------------------------------|------------------------|----------|
| <b>PALMATINE CHLORIDE</b>              |                        |          |
| 10.0E-9                                |                        | 82.31    |
| 100.0E-9                               |                        | 79.38    |
| 1.0E-6                                 |                        | 88.55    |
| 10.0E-6                                |                        | 78.85    |
| <b>PANCURONIUM BROMIDE</b>             |                        |          |
| 10.0E-9                                |                        | 98.93    |
| 100.0E-9                               |                        | 110.26   |
| 1.0E-6                                 |                        | 89.90    |
| 10.0E-6                                |                        | 100.65   |
| <b>PANGAMIC ACID SODIUM</b>            |                        |          |
| 10.0E-9                                |                        | 91.29    |
| 100.0E-9                               |                        | 94.12    |
| 1.0E-6                                 |                        | 105.02   |
| 10.0E-6                                |                        | 99.45    |
| <b>PANTETHINE</b>                      |                        |          |
| 10.0E-9                                |                        | 90.94    |
| 100.0E-9                               |                        | 79.34    |
| 1.0E-6                                 |                        | 97.39    |
| 10.0E-6                                |                        | 91.25    |
| <b>PANTOPRAZOLE</b>                    |                        |          |
| 10.0E-9                                |                        | 113.63   |
| 100.0E-9                               |                        | 128.61   |
| 1.0E-6                                 |                        | 137.42   |
| 10.0E-6                                |                        | 102.51   |
| <b>PANTOTHENIC ACID(d) Na salt</b>     |                        |          |
| 10.0E-9                                |                        | 92.69    |
| 100.0E-9                               |                        | 116.67   |
| 1.0E-6                                 |                        | 130.99   |
| 10.0E-6                                |                        | 61.52    |
| <b>PAPAVERINE HYDROCHLORIDE</b>        |                        |          |
| 10.0E-9                                |                        | 94.18    |
| 100.0E-9                               |                        | 100.28   |
| 1.0E-6                                 |                        | 94.35    |
| 10.0E-6                                |                        | 70.44    |
| <b>PARACHLOROPHENOL</b>                |                        |          |
| 10.0E-9                                |                        | 139.36   |
| 100.0E-9                               |                        | 149.94   |
| 1.0E-6                                 |                        | 102.62   |
| 10.0E-6                                |                        | 93.12    |
| <b>PARAMETHADIONE</b>                  |                        |          |
| 10.0E-9                                |                        | 148.53   |
| 100.0E-9                               |                        | 146.25   |
| 1.0E-6                                 |                        | 157.29   |
| 10.0E-6                                |                        | 84.86    |
| <b>PARAROSANILINE PAMOATE</b>          |                        |          |
| 10.0E-9                                |                        | 106.11   |
| 100.0E-9                               |                        | 114.69   |
| 1.0E-6                                 |                        | 100.47   |
| 10.0E-6                                |                        | 32.09    |
| <b>PARAXANTHINE</b>                    |                        |          |
| 10.0E-9                                |                        | 150.74   |
| 100.0E-9                               |                        | 103.64   |
| 1.0E-6                                 |                        | 112.02   |
| 10.0E-6                                |                        | 122.15   |
| <b>PARGYLINE HYDROCHLORIDE</b>         |                        |          |
| 10.0E-9                                |                        | 117.37   |
| 100.0E-9                               |                        | 121.28   |
| 1.0E-6                                 |                        | 102.62   |
| 10.0E-6                                |                        | 116.92   |
| <b>PAROMOMYCIN SULFATE</b>             |                        |          |
| 10.0E-9                                |                        | 89.52    |
| 100.0E-9                               |                        | 111.17   |
| 1.0E-6                                 |                        | 87.16    |
| 10.0E-6                                |                        | 107.61   |
| <b>PAROXETINE HYDROCHLORIDE</b>        |                        |          |
| 10.0E-9                                |                        | 107.41   |
| 100.0E-9                               |                        | 99.29    |
| 1.0E-6                                 |                        | 118.46   |
| 10.0E-6                                |                        | 75.84    |
| <b>PARTHENOLIDE</b>                    |                        |          |
| 10.0E-9                                |                        | 135.74   |
| 100.0E-9                               |                        | 88.72    |
| 1.0E-6                                 |                        | 107.00   |
| 10.0E-6                                |                        | 95.08    |
| <b>PASINIAZID</b>                      |                        |          |
| 10.0E-9                                |                        | 85.22    |
| 100.0E-9                               |                        | 118.80   |
| 1.0E-6                                 |                        | 106.31   |
| 10.0E-6                                |                        | 139.46   |
| <b>PATULIN</b>                         |                        |          |
| 10.0E-9                                |                        | 94.76    |
| 100.0E-9                               |                        | 80.71    |
| 1.0E-6                                 |                        | 11.00    |
| 10.0E-6                                |                        | -0.85    |



| Compounds and Final Concentrations (M) | Average of % Viability | Hits (✓) |
|----------------------------------------|------------------------|----------|
| <b>p-CHLOROPHENYLALANINE</b>           |                        |          |
| 10.0E-9                                |                        | 123.34   |
| 100.0E-9                               |                        | 113.64   |
| 1.0E-6                                 |                        | 114.89   |
| 10.0E-6                                |                        | 153.22   |
| <b>PECTOLINARIN</b>                    |                        |          |
| 10.0E-9                                |                        | 108.25   |
| 100.0E-9                               |                        | 89.60    |
| 1.0E-6                                 |                        | 101.01   |
| 10.0E-6                                |                        | 141.96   |
| <b>PEFLOXACINE MESYLATE</b>            |                        |          |
| 10.0E-9                                |                        | 138.91   |
| 100.0E-9                               |                        | 103.17   |
| 1.0E-6                                 |                        | 120.40   |
| 10.0E-6                                |                        | 113.82   |
| <b>PELLETIERINE HYDROCHLORIDE</b>      |                        |          |
| 10.0E-9                                |                        | 131.38   |
| 100.0E-9                               |                        | 127.62   |
| 1.0E-6                                 |                        | 88.62    |
| 10.0E-6                                |                        | 107.49   |
| <b>PEMPIDINE TARTRATE</b>              |                        |          |
| 10.0E-9                                |                        | 100.91   |
| 100.0E-9                               |                        | 133.41   |
| 1.0E-6                                 |                        | 110.46   |
| 10.0E-6                                |                        | 108.81   |
| <b>PENFLURIDOL</b>                     |                        |          |
| 10.0E-9                                |                        | 117.15   |
| 100.0E-9                               |                        | 148.77   |
| 1.0E-6                                 |                        | 79.95    |
| 10.0E-6                                |                        | 1.19     |
| <b>PENICILLAMINE</b>                   |                        |          |
| 10.0E-9                                |                        | 100.47   |
| 100.0E-9                               |                        | 131.95   |
| 1.0E-6                                 |                        | 124.09   |
| 10.0E-6                                |                        | 115.88   |
| <b>PENICILLIN G POTASSIUM</b>          |                        |          |
| 10.0E-9                                |                        | 102.20   |
| 100.0E-9                               |                        | 114.43   |
| 1.0E-6                                 |                        | 103.48   |
| 10.0E-6                                |                        | 85.57    |
| <b>PENICILLIN V POTASSIUM</b>          |                        |          |
| 10.0E-9                                |                        | 73.51    |
| 100.0E-9                               |                        | 128.95   |
| 1.0E-6                                 |                        | 105.10   |
| 10.0E-6                                |                        | 139.91   |
| <b>PENTACHLOROPHENOL</b>               |                        |          |
| 10.0E-9                                |                        | 136.35   |
| 100.0E-9                               |                        | 113.92   |
| 1.0E-6                                 |                        | 100.55   |
| 10.0E-6                                |                        | 110.14   |
| <b>PENTAMIDINE ISETHIONATE</b>         |                        |          |
| 10.0E-9                                |                        | 114.74   |
| 100.0E-9                               |                        | 93.40    |
| 1.0E-6                                 |                        | 105.13   |
| 10.0E-6                                |                        | 80.35    |
| <b>PENTETIC ACID</b>                   |                        |          |
| 10.0E-9                                |                        | 92.86    |
| 100.0E-9                               |                        | 114.46   |
| 1.0E-6                                 |                        | 136.48   |
| 10.0E-6                                |                        | 81.83    |
| <b>PENTOXIFYLLINE</b>                  |                        |          |
| 10.0E-9                                |                        | 64.07    |
| 100.0E-9                               |                        | 92.98    |
| 1.0E-6                                 |                        | 132.08   |
| 10.0E-6                                |                        | 74.57    |
| <b>PENTYLENETETRAZOL</b>               |                        |          |
| 10.0E-9                                |                        | 100.06   |
| 100.0E-9                               |                        | 90.12    |
| 1.0E-6                                 |                        | 118.95   |
| 10.0E-6                                |                        | 109.59   |
| <b>PEONIFLORIN</b>                     |                        |          |
| 10.0E-9                                |                        | 88.96    |
| 100.0E-9                               |                        | 93.58    |
| 1.0E-6                                 |                        | 145.81   |
| 10.0E-6                                |                        | 107.14   |
| <b>PERGOLIDE MESYLATE</b>              |                        |          |
| 10.0E-9                                |                        | 134.25   |
| 100.0E-9                               |                        | 113.41   |
| 1.0E-6                                 |                        | 113.87   |
| 10.0E-6                                |                        | 140.05   |
| <b>PERHEXILINE MALEATE</b>             |                        |          |
| 10.0E-9                                |                        | 121.98   |
| 100.0E-9                               |                        | 114.60   |
| 1.0E-6                                 |                        | 96.86    |
| 10.0E-6                                |                        | 93.96    |

| Compounds and Final Concentrations (M) | Average of % Viability | Hits (✓) |
|----------------------------------------|------------------------|----------|
| <b>PERICIAZINE</b>                     |                        |          |
| 10.0E-9                                |                        | 98.41    |
| 100.0E-9                               |                        | 72.69    |
| 1.0E-6                                 |                        | 111.05   |
| 10.0E-6                                |                        | 111.81   |
| <b>PERILLIC ACID (-)</b>               |                        |          |
| 10.0E-9                                |                        | 98.56    |
| 100.0E-9                               |                        | 80.58    |
| 1.0E-6                                 |                        | 95.72    |
| 10.0E-6                                |                        | 91.60    |
| <b>PERILLYL ALCOHOL</b>                |                        |          |
| 10.0E-9                                |                        | 96.67    |
| 100.0E-9                               |                        | 114.52   |
| 1.0E-6                                 |                        | 117.92   |
| 10.0E-6                                |                        | 97.82    |
| <b>PERINDOPRIL ERBUMINE</b>            |                        |          |
| 10.0E-9                                |                        | 145.76   |
| 100.0E-9                               |                        | 123.72   |
| 1.0E-6                                 |                        | 80.64    |
| 10.0E-6                                |                        | 68.68    |
| <b>PERPHENAZINE</b>                    |                        |          |
| 10.0E-9                                |                        | 75.79    |
| 100.0E-9                               |                        | 101.76   |
| 1.0E-6                                 |                        | 104.88   |
| 10.0E-6                                |                        | 75.81    |
| <b>PERSEITOL</b>                       |                        |          |
| 10.0E-9                                |                        | 137.26   |
| 100.0E-9                               |                        | 119.02   |
| 1.0E-6                                 |                        | 81.50    |
| 10.0E-6                                |                        | 115.12   |
| <b>PERSEITOL HEPTAACETATE</b>          |                        |          |
| 10.0E-9                                |                        | 130.47   |
| 100.0E-9                               |                        | 175.00   |
| 1.0E-6                                 |                        | 101.82   |
| 10.0E-6                                |                        | 88.46    |
| <b>PERUVOSIDE</b>                      |                        |          |
| 10.0E-9                                |                        | 97.42    |
| 100.0E-9                               |                        | 93.93    |
| 1.0E-6                                 |                        | 102.06   |
| 10.0E-6                                |                        | 97.74    |
| <b>PEUCENIN</b>                        |                        |          |
| 10.0E-9                                |                        | 169.11   |
| 100.0E-9                               |                        | 142.22   |
| 1.0E-6                                 |                        | 119.86   |
| 10.0E-6                                |                        | 79.47    |
| <b>p-FLUOROPHENYLALANINE</b>           |                        |          |
| 10.0E-9                                |                        | 80.15    |
| 100.0E-9                               |                        | 85.35    |
| 1.0E-6                                 |                        | 116.12   |
| 10.0E-6                                |                        | 110.05   |
| <b>PHENACEMIDE</b>                     |                        |          |
| 10.0E-9                                |                        | 132.96   |
| 100.0E-9                               |                        | 90.26    |
| 1.0E-6                                 |                        | 113.82   |
| 10.0E-6                                |                        | 108.72   |
| <b>PHENACETIN</b>                      |                        |          |
| 10.0E-9                                |                        | 115.41   |
| 100.0E-9                               |                        | 153.53   |
| 1.0E-6                                 |                        | 111.21   |
| 10.0E-6                                |                        | 99.90    |
| <b>PHENACYLAMINE HYDROCHLORIDE</b>     |                        |          |
| 10.0E-9                                |                        | 114.10   |
| 100.0E-9                               |                        | 96.88    |
| 1.0E-6                                 |                        | 94.69    |
| 10.0E-6                                |                        | 93.05    |
| <b>PHENAZOPYRIDINE HYDROCHLORIDE</b>   |                        |          |
| 10.0E-9                                |                        | 111.09   |
| 100.0E-9                               |                        | 115.81   |
| 1.0E-6                                 |                        | 128.22   |
| 10.0E-6                                |                        | 95.16    |
| <b>PHENELZINE SULFATE</b>              |                        |          |
| 10.0E-9                                |                        | 89.31    |
| 100.0E-9                               |                        | 166.13   |
| 1.0E-6                                 |                        | 134.62   |
| 10.0E-6                                |                        | 100.45   |
| <b>PHENETHYL CAFFEATE (CAPE)</b>       |                        |          |
| 10.0E-9                                |                        | 96.30    |
| 100.0E-9                               |                        | 93.81    |
| 1.0E-6                                 |                        | 56.44    |
| 10.0E-6                                |                        | 35.25    |
| <b>PHENFORMIN HYDROCHLORIDE</b>        |                        |          |
| 10.0E-9                                |                        | 133.40   |
| 100.0E-9                               |                        | 119.91   |
| 1.0E-6                                 |                        | 89.95    |
| 10.0E-6                                |                        | 96.25    |

| Compounds and Final Concentrations (M)   | Average of % Viability | Hits (✓) |
|------------------------------------------|------------------------|----------|
| <b>PHENINDIONE</b>                       |                        |          |
| 10.0E-9                                  |                        | 129.42   |
| 100.0E-9                                 |                        | 120.46   |
| 1.0E-6                                   |                        | 112.88   |
| 10.0E-6                                  |                        | 150.02   |
| <b>PHENIRAMINE MALEATE</b>               |                        |          |
| 10.0E-9                                  |                        | 106.77   |
| 100.0E-9                                 |                        | 149.10   |
| 1.0E-6                                   |                        | 99.02    |
| 10.0E-6                                  |                        | 120.03   |
| <b>PHENOLPHTHALEIN</b>                   |                        |          |
| 10.0E-9                                  |                        | 112.10   |
| 100.0E-9                                 |                        | 125.72   |
| 1.0E-6                                   |                        | 104.36   |
| 10.0E-6                                  |                        | 121.65   |
| <b>PHENOTHRIN</b>                        |                        |          |
| 10.0E-9                                  |                        | 123.99   |
| 100.0E-9                                 |                        | 116.06   |
| 1.0E-6                                   |                        | 77.68    |
| 10.0E-6                                  |                        | 93.99    |
| <b>PHENOXYBENZAMINE HYDROCHLORIDE</b>    |                        |          |
| 10.0E-9                                  |                        | 112.63   |
| 100.0E-9                                 |                        | 128.56   |
| 1.0E-6                                   |                        | 87.02    |
| 10.0E-6                                  |                        | 114.82   |
| <b>PHENTERMINE</b>                       |                        |          |
| 10.0E-9                                  |                        | 91.37    |
| 100.0E-9                                 |                        | 119.73   |
| 1.0E-6                                   |                        | 124.45   |
| 10.0E-6                                  |                        | 63.54    |
| <b>PHENTOLAMINE HYDROCHLORIDE</b>        |                        |          |
| 10.0E-9                                  |                        | 129.30   |
| 100.0E-9                                 |                        | 101.00   |
| 1.0E-6                                   |                        | 115.52   |
| 10.0E-6                                  |                        | 113.51   |
| <b>PHENYL AMINOSALICYLATE</b>            |                        |          |
| 10.0E-9                                  |                        | 94.29    |
| 100.0E-9                                 |                        | 119.88   |
| 1.0E-6                                   |                        | 103.68   |
| 10.0E-6                                  |                        | 84.89    |
| <b>PHENYLBUTAZONE</b>                    |                        |          |
| 10.0E-9                                  |                        | 109.98   |
| 100.0E-9                                 |                        | 108.02   |
| 1.0E-6                                   |                        | 112.75   |
| 10.0E-6                                  |                        | 105.55   |
| <b>PHENYLBUTYRATE SODIUM</b>             |                        |          |
| 10.0E-9                                  |                        | 98.50    |
| 100.0E-9                                 |                        | 106.09   |
| 1.0E-6                                   |                        | 115.31   |
| 10.0E-6                                  |                        | 25.02    |
| <b>PHENYLEPHRINE HYDROCHLORIDE</b>       |                        |          |
| 10.0E-9                                  |                        | 87.93    |
| 100.0E-9                                 |                        | 148.36   |
| 1.0E-6                                   |                        | 102.70   |
| 10.0E-6                                  |                        | 122.29   |
| <b>PHENYLETHYL ALCOHOL</b>               |                        |          |
| 10.0E-9                                  |                        | 108.66   |
| 100.0E-9                                 |                        | 121.35   |
| 1.0E-6                                   |                        | 111.95   |
| 10.0E-6                                  |                        | 100.38   |
| <b>PHENYLMERCURIC ACETATE</b>            |                        |          |
| 10.0E-9                                  |                        | 90.08    |
| 100.0E-9                                 |                        | 132.58   |
| 1.0E-6                                   |                        | 66.99    |
| 10.0E-6                                  |                        | -0.12    |
| <b>PHENYLPROPANOLAMINE HYDROCHLORIDE</b> |                        |          |
| 10.0E-9                                  |                        | 93.59    |
| 100.0E-9                                 |                        | 141.65   |
| 1.0E-6                                   |                        | 114.59   |
| 10.0E-6                                  |                        | 110.22   |
| <b>PHENYTOIN SODIUM</b>                  |                        |          |
| 10.0E-9                                  |                        | 88.10    |
| 100.0E-9                                 |                        | 89.49    |
| 1.0E-6                                   |                        | 66.88    |
| 10.0E-6                                  |                        | 81.81    |
| <b>PHLORACETOPHENONE</b>                 |                        |          |
| 10.0E-9                                  |                        | 112.06   |
| 100.0E-9                                 |                        | 109.72   |
| 1.0E-6                                   |                        | 112.44   |
| 10.0E-6                                  |                        | 96.61    |
| <b>PHLORETIN</b>                         |                        |          |
| 10.0E-9                                  |                        | 92.88    |
| 100.0E-9                                 |                        | 99.50    |
| 1.0E-6                                   |                        | 77.11    |
| 10.0E-6                                  |                        | 137.81   |

| Compounds and Final Concentrations (M) | Average of % Viability | Hits (✓) |
|----------------------------------------|------------------------|----------|
| <b>PHLORIDZIN</b>                      |                        |          |
| 10.0E-9                                |                        | 74.61    |
| 100.0E-9                               |                        | 92.79    |
| 1.0E-6                                 |                        | 108.96   |
| 10.0E-6                                |                        | 103.42   |
| <b>PHTHALYLSULFATHIAZOLE</b>           |                        |          |
| 10.0E-9                                |                        | 122.13   |
| 100.0E-9                               |                        | 94.45    |
| 1.0E-6                                 |                        | 74.21    |
| 10.0E-6                                |                        | 64.22    |
| <b>PHYSCION</b>                        |                        |          |
| 10.0E-9                                |                        | 93.61    |
| 100.0E-9                               |                        | 103.64   |
| 1.0E-6                                 |                        | 104.00   |
| 10.0E-6                                |                        | 136.62   |
| <b>PHYSOSTIGMINE SALICYLATE</b>        |                        |          |
| 10.0E-9                                |                        | 93.98    |
| 100.0E-9                               |                        | 125.83   |
| 1.0E-6                                 |                        | 107.79   |
| 10.0E-6                                |                        | 127.00   |
| <b>PHYTOL</b>                          |                        |          |
| 10.0E-9                                |                        | 97.66    |
| 100.0E-9                               |                        | 98.42    |
| 1.0E-6                                 |                        | 115.91   |
| 10.0E-6                                |                        | 86.59    |
| <b>PHYTONADIONE</b>                    |                        |          |
| 10.0E-9                                |                        | 144.20   |
| 100.0E-9                               |                        | 93.66    |
| 1.0E-6                                 |                        | 139.81   |
| 10.0E-6                                |                        | 92.03    |
| <b>PICROPODOPHYLLIN</b>                |                        |          |
| 10.0E-9                                |                        | 107.31   |
| 100.0E-9                               |                        | 112.94   |
| 1.0E-6                                 |                        | 72.90    |
| 10.0E-6                                |                        | 38.79    |
| <b>PICROTIN</b>                        |                        |          |
| 10.0E-9                                |                        | 144.92   |
| 100.0E-9                               |                        | 121.99   |
| 1.0E-6                                 |                        | 117.77   |
| 10.0E-6                                |                        | 89.91    |
| <b>PICROTOXININ</b>                    |                        |          |
| 10.0E-9                                |                        | 125.48   |
| 100.0E-9                               |                        | 84.31    |
| 1.0E-6                                 |                        | 172.41   |
| 10.0E-6                                |                        | 96.95    |
| <b>PILOCARPINE NITRATE</b>             |                        |          |
| 10.0E-9                                |                        | 92.08    |
| 100.0E-9                               |                        | 111.10   |
| 1.0E-6                                 |                        | 111.90   |
| 10.0E-6                                |                        | 120.87   |
| <b>PIMETHIXENE MALEATE</b>             |                        |          |
| 10.0E-9                                |                        | 114.73   |
| 100.0E-9                               |                        | 143.02   |
| 1.0E-6                                 |                        | 109.62   |
| 10.0E-6                                |                        | 67.21    |
| <b>PIMOZIDE</b>                        |                        |          |
| 10.0E-9                                |                        | 106.44   |
| 100.0E-9                               |                        | 99.46    |
| 1.0E-6                                 |                        | 98.75    |
| 10.0E-6                                |                        | 73.53    |
| <b>PIMPINELLIN</b>                     |                        |          |
| 10.0E-9                                |                        | 122.82   |
| 100.0E-9                               |                        | 83.82    |
| 1.0E-6                                 |                        | 115.00   |
| 10.0E-6                                |                        | 114.71   |
| <b>PINACIDIL</b>                       |                        |          |
| 10.0E-9                                |                        | 79.05    |
| 100.0E-9                               |                        | 114.46   |
| 1.0E-6                                 |                        | 86.75    |
| 10.0E-6                                |                        | 102.43   |
| <b>PINDOLOL</b>                        |                        |          |
| 10.0E-9                                |                        | 113.25   |
| 100.0E-9                               |                        | 102.46   |
| 1.0E-6                                 |                        | 125.33   |
| 10.0E-6                                |                        | 78.02    |
| <b>PIOGLITAZONE HYDROCHLORIDE</b>      |                        |          |
| 10.0E-9                                |                        | 95.68    |
| 100.0E-9                               |                        | 133.32   |
| 1.0E-6                                 |                        | 89.37    |
| 10.0E-6                                |                        | 105.00   |
| <b>PIPAMPERONE</b>                     |                        |          |
| 10.0E-9                                |                        | 147.77   |
| 100.0E-9                               |                        | 90.93    |
| 1.0E-6                                 |                        | 128.07   |
| 10.0E-6                                |                        | 72.48    |

| Compounds and Final Concentrations (M) | Average of % Viability | Hits (✓) |
|----------------------------------------|------------------------|----------|
| <b>PIPEMIDIC ACID</b>                  |                        |          |
| 10.0E-9                                |                        | 88.95    |
| 100.0E-9                               |                        | 91.75    |
| 1.0E-6                                 |                        | 109.92   |
| 10.0E-6                                |                        | 114.89   |
| <b>PIPENZOLATE BROMIDE</b>             |                        |          |
| 10.0E-9                                |                        | 125.80   |
| 100.0E-9                               |                        | 134.49   |
| 1.0E-6                                 |                        | 137.66   |
| 10.0E-6                                |                        | 136.72   |
| <b>PIPERACILLIN SODIUM</b>             |                        |          |
| 10.0E-9                                |                        | 121.96   |
| 100.0E-9                               |                        | 121.78   |
| 1.0E-6                                 |                        | 84.89    |
| 10.0E-6                                |                        | 101.45   |
| <b>PIPERAZINE</b>                      |                        |          |
| 10.0E-9                                |                        | 121.26   |
| 100.0E-9                               |                        | 116.06   |
| 1.0E-6                                 |                        | 99.39    |
| 10.0E-6                                |                        | 134.81   |
| <b>PIPERIC ACID</b>                    |                        |          |
| 10.0E-9                                |                        | 89.65    |
| 100.0E-9                               |                        | 87.78    |
| 1.0E-6                                 |                        | 101.04   |
| 10.0E-6                                |                        | 50.27    |
| <b>PIPERIDOLATE HYDROCHLORIDE</b>      |                        |          |
| 10.0E-9                                |                        | 115.51   |
| 100.0E-9                               |                        | 133.28   |
| 1.0E-6                                 |                        | 133.09   |
| 10.0E-6                                |                        | 83.31    |
| <b>PIPERINE</b>                        |                        |          |
| 10.0E-9                                |                        | 102.79   |
| 100.0E-9                               |                        | 125.18   |
| 1.0E-6                                 |                        | 73.00    |
| 10.0E-6                                |                        | 140.04   |
| <b>PIPERONYLIC ACID</b>                |                        |          |
| 10.0E-9                                |                        | 150.70   |
| 100.0E-9                               |                        | 105.81   |
| 1.0E-6                                 |                        | 99.14    |
| 10.0E-6                                |                        | 144.39   |
| <b>PIPLARTINE</b>                      |                        |          |
| 10.0E-9                                |                        | 127.84   |
| 100.0E-9                               |                        | 106.38   |
| 1.0E-6                                 |                        | 100.17   |
| 10.0E-6                                |                        | 50.17    |
| <b>PIPOBROMAN</b>                      |                        |          |
| 10.0E-9                                |                        | 111.53   |
| 100.0E-9                               |                        | 99.04    |
| 1.0E-6                                 |                        | 109.73   |
| 10.0E-6                                |                        | 104.28   |
| <b>PIRACETAM</b>                       |                        |          |
| 10.0E-9                                |                        | 85.01    |
| 100.0E-9                               |                        | 105.89   |
| 1.0E-6                                 |                        | 94.35    |
| 10.0E-6                                |                        | 90.09    |
| <b>PIRENPERONE</b>                     |                        |          |
| 10.0E-9                                |                        | 113.31   |
| 100.0E-9                               |                        | 105.49   |
| 1.0E-6                                 |                        | 100.03   |
| 10.0E-6                                |                        | 127.63   |
| <b>PIRENZEPINE HYDROCHLORIDE</b>       |                        |          |
| 10.0E-9                                |                        | 86.99    |
| 100.0E-9                               |                        | 96.58    |
| 1.0E-6                                 |                        | 110.48   |
| 10.0E-6                                |                        | 125.22   |
| <b>PIRIBEDIL HYDROCHLORIDE</b>         |                        |          |
| 10.0E-9                                |                        | 97.23    |
| 100.0E-9                               |                        | 95.78    |
| 1.0E-6                                 |                        | 136.82   |
| 10.0E-6                                |                        | 73.04    |
| <b>PIROMIDIC ACID</b>                  |                        |          |
| 10.0E-9                                |                        | 122.15   |
| 100.0E-9                               |                        | 132.12   |
| 1.0E-6                                 |                        | 99.08    |
| 10.0E-6                                |                        | 95.17    |
| <b>PIROXICAM</b>                       |                        |          |
| 10.0E-9                                |                        | 106.98   |
| 100.0E-9                               |                        | 108.57   |
| 1.0E-6                                 |                        | 107.98   |
| 10.0E-6                                |                        | 98.35    |
| <b>PISCIDIC ACID</b>                   |                        |          |
| 10.0E-9                                |                        | 116.99   |
| 100.0E-9                               |                        | 122.45   |
| 1.0E-6                                 |                        | 105.30   |
| 10.0E-6                                |                        | 70.47    |

| Compounds and Final Concentrations (M) | Average of % Viability | Hits (✓) |
|----------------------------------------|------------------------|----------|
| <b>PIZOTYLIN MALATE</b>                |                        |          |
| 10.0E-9                                |                        | 82.78    |
| 100.0E-9                               |                        | 160.97   |
| 1.0E-6                                 |                        | 152.40   |
| 10.0E-6                                |                        | 133.72   |
| <b>PLUMBAGIN</b>                       |                        |          |
| 10.0E-9                                |                        | 88.67    |
| 100.0E-9                               |                        | 97.74    |
| 1.0E-6                                 |                        | 83.46    |
| 10.0E-6                                |                        | -0.82    |
| <b>PODOFILOX</b>                       |                        |          |
| 10.0E-9                                |                        | 103.57   |
| 100.0E-9                               |                        | 60.72    |
| 1.0E-6                                 |                        | 65.81    |
| 10.0E-6                                |                        | 58.02    |
| <b>PODOPHYLLIN ACETATE</b>             |                        |          |
| 10.0E-9                                |                        | 105.38   |
| 100.0E-9                               |                        | 62.23    |
| 1.0E-6                                 |                        | 61.27    |
| 10.0E-6                                |                        | 57.14    |
| <b>POTDOTOTARIN</b>                    |                        |          |
| 10.0E-9                                |                        | 139.17   |
| 100.0E-9                               |                        | 120.23   |
| 1.0E-6                                 |                        | 108.89   |
| 10.0E-6                                |                        | 96.55    |
| <b>POLYMYXIN B SULFATE</b>             |                        |          |
| 10.0E-9                                |                        | 112.87   |
| 100.0E-9                               |                        | 93.28    |
| 1.0E-6                                 |                        | 114.30   |
| 10.0E-6                                |                        | 118.61   |
| <b>POMIFERIN</b>                       |                        |          |
| 10.0E-9                                |                        | 54.86    |
| 100.0E-9                               |                        | 125.70   |
| 1.0E-6                                 |                        | 93.54    |
| 10.0E-6                                |                        | 119.45   |
| <b>POTASSIUM p-AMINO BENZOATE</b>      |                        |          |
| 10.0E-9                                |                        | 93.29    |
| 100.0E-9                               |                        | 113.93   |
| 1.0E-6                                 |                        | 98.48    |
| 10.0E-6                                |                        | 97.29    |
| <b>PRALIDOXIME CHLORIDE</b>            |                        |          |
| 10.0E-9                                |                        | 106.28   |
| 100.0E-9                               |                        | 69.04    |
| 1.0E-6                                 |                        | 97.21    |
| 10.0E-6                                |                        | 122.97   |
| <b>PRAMOXINE HYDROCHLORIDE</b>         |                        |          |
| 10.0E-9                                |                        | 100.37   |
| 100.0E-9                               |                        | 132.18   |
| 1.0E-6                                 |                        | 63.55    |
| 10.0E-6                                |                        | 89.99    |
| <b>PRASTERONE</b>                      |                        |          |
| 10.0E-9                                |                        | 129.04   |
| 100.0E-9                               |                        | 113.25   |
| 1.0E-6                                 |                        | 134.51   |
| 10.0E-6                                |                        | 71.54    |
| <b>PRASTERONE ACETATE</b>              |                        |          |
| 10.0E-9                                |                        | 108.25   |
| 100.0E-9                               |                        | 100.36   |
| 1.0E-6                                 |                        | 99.55    |
| 10.0E-6                                |                        | 88.60    |
| <b>PRAVASTATIN SODIUM</b>              |                        |          |
| 10.0E-9                                |                        | 121.26   |
| 100.0E-9                               |                        | 101.54   |
| 1.0E-6                                 |                        | 96.62    |
| 10.0E-6                                |                        | 94.15    |
| <b>PRAZIQUANTEL</b>                    |                        |          |
| 10.0E-9                                |                        | 96.70    |
| 100.0E-9                               |                        | 118.12   |
| 1.0E-6                                 |                        | 114.29   |
| 10.0E-6                                |                        | 91.64    |
| <b>PRAZOSIN HYDROCHLORIDE</b>          |                        |          |
| 10.0E-9                                |                        | 83.42    |
| 100.0E-9                               |                        | 128.27   |
| 1.0E-6                                 |                        | 91.93    |
| 10.0E-6                                |                        | 52.53    |
| <b>PREDNISOLONE</b>                    |                        |          |
| 10.0E-9                                |                        | 92.90    |
| 100.0E-9                               |                        | 163.09   |
| 1.0E-6                                 |                        | 112.64   |
| 10.0E-6                                |                        | 97.96    |
| <b>PREDNISOLONE ACETATE</b>            |                        |          |
| 10.0E-9                                |                        | 95.82    |
| 100.0E-9                               |                        | 106.77   |
| 1.0E-6                                 |                        | 96.44    |
| 10.0E-6                                |                        | 110.74   |

| Compounds and Final Concentrations (M) | Average of % Viability | Hits (✓) |
|----------------------------------------|------------------------|----------|
| <b>PREDNISOLONE HEMISUCCINATE</b>      |                        |          |
| 10.0E-9                                | ✓                      | 117.92   |
| 100.0E-9                               | ✓                      | 101.09   |
| 1.0E-6                                 | ✓                      | 120.22   |
| 10.0E-6                                | ✓                      | 119.88   |
| <b>PREDNISOLONE SODIUM PHOSPHATE</b>   |                        |          |
| 10.0E-9                                | ✓                      | 91.68    |
| 100.0E-9                               | ✓                      | 91.59    |
| 1.0E-6                                 | ✓                      | 85.13    |
| 10.0E-6                                | ✓                      | 97.20    |
| <b>PREDNISONE</b>                      |                        |          |
| 10.0E-9                                | ✓                      | 124.92   |
| 100.0E-9                               | ✓                      | 114.22   |
| 1.0E-6                                 | ✓                      | 102.70   |
| 10.0E-6                                | ✓                      | 83.38    |
| <b>PREGABALIN</b>                      |                        |          |
| 10.0E-9                                | ✓                      | 101.91   |
| 100.0E-9                               | ✓                      | 123.11   |
| 1.0E-6                                 | ✓                      | 97.81    |
| 10.0E-6                                | ✓                      | 105.59   |
| <b>PREGNENOLONE</b>                    |                        |          |
| 10.0E-9                                | ✓                      | 107.38   |
| 100.0E-9                               | ✓                      | 84.80    |
| 1.0E-6                                 | ✓                      | 94.48    |
| 10.0E-6                                | ✓                      | 76.33    |
| <b>PREGNENOLONE SUCCINATE</b>          |                        |          |
| 10.0E-9                                | ✓                      | 77.79    |
| 100.0E-9                               | ✓                      | 96.90    |
| 1.0E-6                                 | ✓                      | 106.03   |
| 10.0E-6                                | ✓                      | 85.89    |
| <b>PRENYLETIN</b>                      |                        |          |
| 10.0E-9                                | ✓                      | 124.79   |
| 100.0E-9                               | ✓                      | 86.09    |
| 1.0E-6                                 | ✓                      | 94.69    |
| 10.0E-6                                | ✓                      | 88.05    |
| <b>PRIDINOL METHANESULFONATE</b>       |                        |          |
| 10.0E-9                                | ✓                      | 116.06   |
| 100.0E-9                               | ✓                      | 72.78    |
| 1.0E-6                                 | ✓                      | 97.55    |
| 10.0E-6                                | ✓                      | 88.08    |
| <b>PRILOCAINE HYDROCHLORIDE</b>        |                        |          |
| 10.0E-9                                | ✓                      | 103.78   |
| 100.0E-9                               | ✓                      | 98.06    |
| 1.0E-6                                 | ✓                      | 77.29    |
| 10.0E-6                                | ✓                      | 92.70    |
| <b>PRIMAQUINE DIPHOSPHATE</b>          |                        |          |
| 10.0E-9                                | ✓                      | 100.19   |
| 100.0E-9                               | ✓                      | 114.49   |
| 1.0E-6                                 | ✓                      | 107.13   |
| 10.0E-6                                | ✓                      | 60.86    |
| <b>PRIMIDONE</b>                       |                        |          |
| 10.0E-9                                | ✓                      | 97.65    |
| 100.0E-9                               | ✓                      | 119.93   |
| 1.0E-6                                 | ✓                      | 98.22    |
| 10.0E-6                                | ✓                      | 94.35    |
| <b>PRIMULETIN</b>                      |                        |          |
| 10.0E-9                                | ✓                      | 86.42    |
| 100.0E-9                               | ✓                      | 79.92    |
| 1.0E-6                                 | ✓                      | 84.24    |
| 10.0E-6                                | ✓                      | 88.94    |
| <b>PRISTIMERIN</b>                     |                        |          |
| 10.0E-9                                | ✓                      | 112.02   |
| 100.0E-9                               | ✓                      | 148.90   |
| 1.0E-6                                 | ✓                      | 73.39    |
| 10.0E-6                                | ✓                      | -1.08    |
| <b>PROADIFEN HYDROCHLORIDE</b>         |                        |          |
| 10.0E-9                                | ✓                      | 121.13   |
| 100.0E-9                               | ✓                      | 89.69    |
| 1.0E-6                                 | ✓                      | 154.25   |
| 10.0E-6                                | ✓                      | 87.16    |
| <b>PROBENECID</b>                      |                        |          |
| 10.0E-9                                | ✓                      | 127.74   |
| 100.0E-9                               | ✓                      | 84.85    |
| 1.0E-6                                 | ✓                      | 105.34   |
| 10.0E-6                                | ✓                      | 87.25    |
| <b>PROBUCOL</b>                        |                        |          |
| 10.0E-9                                | ✓                      | 101.03   |
| 100.0E-9                               | ✓                      | 107.60   |
| 1.0E-6                                 | ✓                      | 120.08   |
| 10.0E-6                                | ✓                      | 91.10    |
| <b>PROCAINAMIDE HYDROCHLORIDE</b>      |                        |          |
| 10.0E-9                                | ✓                      | 82.50    |
| 100.0E-9                               | ✓                      | 115.53   |
| 1.0E-6                                 | ✓                      | 93.93    |
| 10.0E-6                                | ✓                      | 95.96    |

| Compounds and Final Concentrations (M) | Average of % Viability | Hits (✓) |
|----------------------------------------|------------------------|----------|
| <b>PROCAINE HYDROCHLORIDE</b>          |                        |          |
| 10.0E-9                                |                        | 115.41   |
| 100.0E-9                               |                        | 121.36   |
| 1.0E-6                                 |                        | 68.89    |
| 10.0E-6                                |                        | 107.13   |
| <b>PROCHLORPERAZINE EDISYLATE</b>      |                        |          |
| 10.0E-9                                |                        | 128.41   |
| 100.0E-9                               |                        | 97.06    |
| 1.0E-6                                 |                        | 90.12    |
| 10.0E-6                                |                        | 87.70    |
| <b>PROCYCLIDINE HYDROCHLORIDE</b>      |                        |          |
| 10.0E-9                                |                        | 94.16    |
| 100.0E-9                               |                        | 137.33   |
| 1.0E-6                                 |                        | 133.85   |
| 10.0E-6                                |                        | 105.96   |
| <b>PROGESTERONE</b>                    |                        |          |
| 10.0E-9                                |                        | 96.21    |
| 100.0E-9                               |                        | 105.68   |
| 1.0E-6                                 |                        | 111.67   |
| 10.0E-6                                |                        | 88.62    |
| <b>PROGLUMIDE</b>                      |                        |          |
| 10.0E-9                                |                        | 110.75   |
| 100.0E-9                               |                        | 93.19    |
| 1.0E-6                                 |                        | 81.01    |
| 10.0E-6                                |                        | 102.41   |
| <b>PROMAZINE HYDROCHLORIDE</b>         |                        |          |
| 10.0E-9                                |                        | 115.97   |
| 100.0E-9                               |                        | 113.67   |
| 1.0E-6                                 |                        | 117.44   |
| 10.0E-6                                |                        | 148.43   |
| <b>PROMETHAZINE HYDROCHLORIDE</b>      |                        |          |
| 10.0E-9                                |                        | 104.23   |
| 100.0E-9                               |                        | 136.09   |
| 1.0E-6                                 |                        | 95.02    |
| 10.0E-6                                |                        | 114.90   |
| <b>PRONETALOL HYDROCHLORIDE</b>        |                        |          |
| 10.0E-9                                |                        | 113.81   |
| 100.0E-9                               |                        | 109.17   |
| 1.0E-6                                 |                        | 142.89   |
| 10.0E-6                                |                        | 122.79   |
| <b>PROPAFENONE HYDROCHLORIDE</b>       |                        |          |
| 10.0E-9                                |                        | 87.89    |
| 100.0E-9                               |                        | 112.65   |
| 1.0E-6                                 |                        | 125.68   |
| 10.0E-6                                |                        | 145.86   |
| <b>PROPANTHELINE BROMIDE</b>           |                        |          |
| 10.0E-9                                |                        | 102.58   |
| 100.0E-9                               |                        | 122.86   |
| 1.0E-6                                 |                        | 98.06    |
| 10.0E-6                                |                        | 84.54    |
| <b>PROPENTOFYLLINE</b>                 |                        |          |
| 10.0E-9                                |                        | 135.39   |
| 100.0E-9                               |                        | 96.96    |
| 1.0E-6                                 |                        | 87.64    |
| 10.0E-6                                |                        | 72.50    |
| <b>PROPOFOL</b>                        |                        |          |
| 10.0E-9                                |                        | 102.36   |
| 100.0E-9                               |                        | 85.09    |
| 1.0E-6                                 |                        | 100.75   |
| 10.0E-6                                |                        | 87.99    |
| <b>PROPRANOLOL HYDROCHLORIDE (+/-)</b> |                        |          |
| 10.0E-9                                |                        | 70.33    |
| 100.0E-9                               |                        | 119.97   |
| 1.0E-6                                 |                        | 105.95   |
| 10.0E-6                                |                        | 89.01    |
| <b>PROPYLTHIOURACIL</b>                |                        |          |
| 10.0E-9                                |                        | 116.78   |
| 100.0E-9                               |                        | 130.96   |
| 1.0E-6                                 |                        | 111.76   |
| 10.0E-6                                |                        | 133.26   |
| <b>PROTIONAMIDE</b>                    |                        |          |
| 10.0E-9                                |                        | 141.10   |
| 100.0E-9                               |                        | 76.80    |
| 1.0E-6                                 |                        | 89.03    |
| 10.0E-6                                |                        | 87.26    |
| <b>PROTOPORPHYRIN IX</b>               |                        |          |
| 10.0E-9                                |                        | 125.74   |
| 100.0E-9                               |                        | 121.99   |
| 1.0E-6                                 |                        | 93.47    |
| 10.0E-6                                |                        | 101.25   |
| <b>PROTOVERATRINE A</b>                |                        |          |
| 10.0E-9                                |                        | 143.50   |
| 100.0E-9                               |                        | 95.71    |
| 1.0E-6                                 |                        | 91.47    |
| 10.0E-6                                |                        | 83.67    |



| Compounds and Final Concentrations (M) | Average of % Viability | Hits (✓) |
|----------------------------------------|------------------------|----------|
| <b>PROTOVERATRINE B</b>                |                        |          |
| 10.0E-9                                |                        | 119.36   |
| 100.0E-9                               |                        | 109.50   |
| 1.0E-6                                 |                        | 134.19   |
| 10.0E-6                                |                        | 58.08    |
| <b>PROTRYPYLINE HYDROCHLORIDE</b>      |                        |          |
| 10.0E-9                                |                        | 123.97   |
| 100.0E-9                               |                        | 77.21    |
| 1.0E-6                                 |                        | 80.45    |
| 10.0E-6                                |                        | 98.26    |
| <b>PROXYPHYLLINE</b>                   |                        |          |
| 10.0E-9                                |                        | 120.19   |
| 100.0E-9                               |                        | 100.33   |
| 1.0E-6                                 |                        | 85.86    |
| 10.0E-6                                |                        | 114.13   |
| <b>PSEUDOANISATIN</b>                  |                        |          |
| 10.0E-9                                |                        | 116.71   |
| 100.0E-9                               |                        | 109.46   |
| 1.0E-6                                 |                        | 126.23   |
| 10.0E-6                                |                        | 110.90   |
| <b>PSEUDOEPHEDRINE HYDROCHLORIDE</b>   |                        |          |
| 10.0E-9                                |                        | 106.74   |
| 100.0E-9                               |                        | 131.33   |
| 1.0E-6                                 |                        | 125.15   |
| 10.0E-6                                |                        | 75.18    |
| <b>PTAEROXYLIN</b>                     |                        |          |
| 10.0E-9                                |                        | 123.74   |
| 100.0E-9                               |                        | 96.34    |
| 1.0E-6                                 |                        | 106.26   |
| 10.0E-6                                |                        | 92.76    |
| <b>PUERARIN</b>                        |                        |          |
| 10.0E-9                                |                        | 125.74   |
| 100.0E-9                               |                        | 108.72   |
| 1.0E-6                                 |                        | 109.10   |
| 10.0E-6                                |                        | 93.21    |
| <b>PUNCTAPORONIN B</b>                 |                        |          |
| 10.0E-9                                |                        | 106.39   |
| 100.0E-9                               |                        | 106.36   |
| 1.0E-6                                 |                        | 93.25    |
| 10.0E-6                                |                        | 81.53    |
| <b>PURMYCIN HYDROCHLORIDE</b>          |                        |          |
| 10.0E-9                                |                        | 87.66    |
| 100.0E-9                               |                        | 63.85    |
| 1.0E-6                                 |                        | 28.74    |
| 10.0E-6                                |                        | 3.26     |
| <b>PURPURIN</b>                        |                        |          |
| 10.0E-9                                |                        | 90.81    |
| 100.0E-9                               |                        | 104.92   |
| 1.0E-6                                 |                        | 82.00    |
| 10.0E-6                                |                        | 94.28    |
| <b>PURPUROGALLIN</b>                   |                        |          |
| 10.0E-9                                |                        | 97.13    |
| 100.0E-9                               |                        | 114.43   |
| 1.0E-6                                 |                        | 114.58   |
| 10.0E-6                                |                        | 74.37    |
| <b>PURPUROGALLIN-4-CARBOXYLIC ACID</b> |                        |          |
| 10.0E-9                                |                        | 97.31    |
| 100.0E-9                               |                        | 113.77   |
| 1.0E-6                                 |                        | 118.28   |
| 10.0E-6                                |                        | 96.86    |
| <b>PYRANTEL PAMOATE</b>                |                        |          |
| 10.0E-9                                |                        | 96.59    |
| 100.0E-9                               |                        | 95.92    |
| 1.0E-6                                 |                        | 105.48   |
| 10.0E-6                                |                        | 124.48   |
| <b>PYRAZINAMIDE</b>                    |                        |          |
| 10.0E-9                                |                        | 107.69   |
| 100.0E-9                               |                        | 127.02   |
| 1.0E-6                                 |                        | 94.72    |
| 10.0E-6                                |                        | 107.19   |
| <b>PYRIDOSTIGMINE BROMIDE</b>          |                        |          |
| 10.0E-9                                |                        | 69.89    |
| 100.0E-9                               |                        | 81.06    |
| 1.0E-6                                 |                        | 98.89    |
| 10.0E-6                                |                        | 93.64    |
| <b>PYRIDOXINE</b>                      |                        |          |
| 10.0E-9                                |                        | 83.62    |
| 100.0E-9                               |                        | 83.99    |
| 1.0E-6                                 |                        | 119.25   |
| 10.0E-6                                |                        | 94.91    |
| <b>PYRILAMINE MALEATE</b>              |                        |          |
| 10.0E-9                                |                        | 92.50    |
| 100.0E-9                               |                        | 111.15   |
| 1.0E-6                                 |                        | 117.96   |
| 10.0E-6                                |                        | 135.84   |

| Compounds and Final Concentrations (M) | Average of % Viability | Hits (✓) |
|----------------------------------------|------------------------|----------|
| <b>PYRIMETHAMINE</b>                   |                        |          |
| 10.0E-9                                |                        | 102.79   |
| 100.0E-9                               |                        | 126.00   |
| 1.0E-6                                 |                        | 99.85    |
| 10.0E-6                                |                        | 121.90   |
| <b>PYRITHIONE ZINC</b>                 |                        | ✓        |
| 10.0E-9                                |                        | 86.62    |
| 100.0E-9                               |                        | 89.38    |
| 1.0E-6                                 |                        | 1.14     |
| 10.0E-6                                |                        | -1.09    |
| <b>PYRITHYLDIONE</b>                   |                        |          |
| 10.0E-9                                |                        | 103.65   |
| 100.0E-9                               |                        | 84.99    |
| 1.0E-6                                 |                        | 96.45    |
| 10.0E-6                                |                        | 96.69    |
| <b>PYRITINOL</b>                       |                        |          |
| 10.0E-9                                |                        | 123.09   |
| 100.0E-9                               |                        | 118.73   |
| 1.0E-6                                 |                        | 163.72   |
| 10.0E-6                                |                        | 81.82    |
| <b>PYROCATECHUIC ACID</b>              |                        |          |
| 10.0E-9                                |                        | 135.10   |
| 100.0E-9                               |                        | 125.48   |
| 1.0E-6                                 |                        | 141.28   |
| 10.0E-6                                |                        | 98.59    |
| <b>PYROGALLIN</b>                      |                        |          |
| 10.0E-9                                |                        | 88.03    |
| 100.0E-9                               |                        | 112.24   |
| 1.0E-6                                 |                        | 90.56    |
| 10.0E-6                                |                        | 62.15    |
| <b>PYRRROMYCIN</b>                     |                        |          |
| 10.0E-9                                |                        | 98.06    |
| 100.0E-9                               |                        | 112.97   |
| 1.0E-6                                 |                        | 114.98   |
| 10.0E-6                                |                        | 104.78   |
| <b>PYRVINIUM PAMOATE</b>               |                        | ✓        |
| 10.0E-9                                |                        | 132.22   |
| 100.0E-9                               |                        | 143.70   |
| 1.0E-6                                 |                        | 97.95    |
| 10.0E-6                                |                        | 35.89    |
| <b>QUASSIN</b>                         |                        |          |
| 10.0E-9                                |                        | 129.47   |
| 100.0E-9                               |                        | 124.14   |
| 1.0E-6                                 |                        | 122.05   |
| 10.0E-6                                |                        | 107.08   |
| <b>QUEBRACHITOL</b>                    |                        |          |
| 10.0E-9                                |                        | 117.58   |
| 100.0E-9                               |                        | 111.10   |
| 1.0E-6                                 |                        | 113.69   |
| 10.0E-6                                |                        | 82.83    |
| <b>QUERCETIN</b>                       |                        |          |
| 10.0E-9                                |                        | 106.39   |
| 100.0E-9                               |                        | 123.71   |
| 1.0E-6                                 |                        | 104.48   |
| 10.0E-6                                |                        | 108.25   |
| <b>QUERCITRIN</b>                      |                        |          |
| 10.0E-9                                |                        | 105.51   |
| 100.0E-9                               |                        | 100.65   |
| 1.0E-6                                 |                        | 106.14   |
| 10.0E-6                                |                        | 97.89    |
| <b>QUETIAPINE</b>                      |                        |          |
| 10.0E-9                                |                        | 93.49    |
| 100.0E-9                               |                        | 94.06    |
| 1.0E-6                                 |                        | 122.16   |
| 10.0E-6                                |                        | 92.62    |
| <b>QUINACRINE HYDROCHLORIDE</b>        |                        |          |
| 10.0E-9                                |                        | 111.29   |
| 100.0E-9                               |                        | 150.03   |
| 1.0E-6                                 |                        | 115.74   |
| 10.0E-6                                |                        | 3.30     |
| <b>QUINAPRIL HYDROCHLORIDE</b>         |                        |          |
| 10.0E-9                                |                        | 117.12   |
| 100.0E-9                               |                        | 102.32   |
| 1.0E-6                                 |                        | 105.23   |
| 10.0E-6                                |                        | 104.64   |
| <b>QUINIC ACID</b>                     |                        |          |
| 10.0E-9                                |                        | 99.70    |
| 100.0E-9                               |                        | 91.07    |
| 1.0E-6                                 |                        | 115.91   |
| 10.0E-6                                |                        | 91.25    |
| <b>QUINIDINE GLUCONATE</b>             |                        |          |
| 10.0E-9                                |                        | 99.41    |
| 100.0E-9                               |                        | 133.99   |
| 1.0E-6                                 |                        | 117.61   |
| 10.0E-6                                |                        | 133.65   |

| Compounds and Final Concentrations (M) | Average of % Viability | Hits (✓) |
|----------------------------------------|------------------------|----------|
| <b>QUININE ETHYL CARBONATE</b>         |                        |          |
| 10.0E-9                                |                        | 106.45   |
| 100.0E-9                               |                        | 92.51    |
| 1.0E-6                                 |                        | 71.46    |
| 10.0E-6                                |                        | 124.70   |
| <b>QUININE SULFATE</b>                 |                        |          |
| 10.0E-9                                |                        | 140.54   |
| 100.0E-9                               |                        | 120.92   |
| 1.0E-6                                 |                        | 149.26   |
| 10.0E-6                                |                        | 135.71   |
| <b>QUINOLINIC ACID</b>                 |                        |          |
| 10.0E-9                                |                        | 110.15   |
| 100.0E-9                               |                        | 142.14   |
| 1.0E-6                                 |                        | 147.12   |
| 10.0E-6                                |                        | 132.21   |
| <b>QUIPAZINE MALEATE</b>               |                        |          |
| 10.0E-9                                |                        | 85.85    |
| 100.0E-9                               |                        | 146.10   |
| 1.0E-6                                 |                        | 138.29   |
| 10.0E-6                                |                        | 72.28    |
| <b>RABEPRAZOLE SODIUM</b>              |                        |          |
| 10.0E-9                                |                        | 88.04    |
| 100.0E-9                               |                        | 108.62   |
| 1.0E-6                                 |                        | 108.02   |
| 10.0E-6                                |                        | 95.91    |
| <b>RACEPHEDRINE HYDROCHLORIDE</b>      |                        |          |
| 10.0E-9                                |                        | 137.43   |
| 100.0E-9                               |                        | 115.48   |
| 1.0E-6                                 |                        | 95.24    |
| 10.0E-6                                |                        | 147.01   |
| <b>RALOXIFENE HYDROCHLORIDE</b>        |                        |          |
| 10.0E-9                                |                        | 97.45    |
| 100.0E-9                               |                        | 105.31   |
| 1.0E-6                                 |                        | 146.67   |
| 10.0E-6                                |                        | 90.95    |
| <b>RAMIFENAZONE</b>                    |                        |          |
| 10.0E-9                                |                        | 109.14   |
| 100.0E-9                               |                        | 141.53   |
| 1.0E-6                                 |                        | 97.11    |
| 10.0E-6                                |                        | 101.01   |
| <b>RAMIPRIL</b>                        |                        |          |
| 10.0E-9                                |                        | 98.60    |
| 100.0E-9                               |                        | 127.42   |
| 1.0E-6                                 |                        | 91.57    |
| 10.0E-6                                |                        | 112.83   |
| <b>RANITIDINE</b>                      |                        |          |
| 10.0E-9                                |                        | 77.39    |
| 100.0E-9                               |                        | 103.46   |
| 1.0E-6                                 |                        | 91.55    |
| 10.0E-6                                |                        | 104.57   |
| <b>RANOLAZINE</b>                      |                        |          |
| 10.0E-9                                |                        | 99.16    |
| 100.0E-9                               |                        | 111.44   |
| 1.0E-6                                 |                        | 108.22   |
| 10.0E-6                                |                        | 132.43   |
| <b>RAUWOLSCINE HYDROCHLORIDE</b>       |                        |          |
| 10.0E-9                                |                        | 102.93   |
| 100.0E-9                               |                        | 78.87    |
| 1.0E-6                                 |                        | 72.82    |
| 10.0E-6                                |                        | 83.66    |
| <b>REBAMIPIDE</b>                      |                        |          |
| 10.0E-9                                |                        | 81.51    |
| 100.0E-9                               |                        | 135.86   |
| 1.0E-6                                 |                        | 129.66   |
| 10.0E-6                                |                        | 98.55    |
| <b>RESERPINE</b>                       |                        |          |
| 10.0E-9                                |                        | 75.88    |
| 100.0E-9                               |                        | 115.95   |
| 1.0E-6                                 |                        | 82.65    |
| 10.0E-6                                |                        | 116.68   |
| <b>RESORCINOL</b>                      |                        |          |
| 10.0E-9                                |                        | 112.37   |
| 100.0E-9                               |                        | 121.18   |
| 1.0E-6                                 |                        | 91.88    |
| 10.0E-6                                |                        | 105.64   |
| <b>RESORCINOL MONOACETATE</b>          |                        |          |
| 10.0E-9                                |                        | 103.21   |
| 100.0E-9                               |                        | 116.10   |
| 1.0E-6                                 |                        | 123.57   |
| 10.0E-6                                |                        | 86.25    |
| <b>RESVERATROL</b>                     |                        |          |
| 10.0E-9                                |                        | 130.85   |
| 100.0E-9                               |                        | 104.07   |
| 1.0E-6                                 |                        | 101.54   |
| 10.0E-6                                |                        | 132.91   |

| Compounds and Final Concentrations (M) | Average of % Viability | Hits (✓) |
|----------------------------------------|------------------------|----------|
| <b>RESVERATROL 4'-METHYL ETHER</b>     |                        |          |
| 10.0E-9                                |                        | 108.94   |
| 100.0E-9                               |                        | 96.72    |
| 1.0E-6                                 |                        | 87.87    |
| 10.0E-6                                |                        | 45.86    |
| <b>RETINOL</b>                         |                        |          |
| 10.0E-9                                |                        | 98.32    |
| 100.0E-9                               |                        | 104.60   |
| 1.0E-6                                 |                        | 108.14   |
| 10.0E-6                                |                        | 107.02   |
| <b>RETINYL ACETATE</b>                 |                        |          |
| 10.0E-9                                |                        | 104.55   |
| 100.0E-9                               |                        | 67.60    |
| 1.0E-6                                 |                        | 122.33   |
| 10.0E-6                                |                        | 89.84    |
| <b>RETINYL PALMITATE</b>               |                        |          |
| 10.0E-9                                |                        | 89.74    |
| 100.0E-9                               |                        | 115.31   |
| 1.0E-6                                 |                        | 115.02   |
| 10.0E-6                                |                        | 99.82    |
| <b>RETUSIN</b>                         |                        |          |
| 10.0E-9                                |                        | 111.13   |
| 100.0E-9                               |                        | 98.82    |
| 1.0E-6                                 |                        | 95.57    |
| 10.0E-6                                |                        | 118.10   |
| <b>RETUSIN 7-METHYL ETHER</b>          |                        |          |
| 10.0E-9                                |                        | 100.68   |
| 100.0E-9                               |                        | 123.58   |
| 1.0E-6                                 |                        | 85.35    |
| 10.0E-6                                |                        | 118.92   |
| <b>RHETSININE</b>                      |                        |          |
| 10.0E-9                                |                        | 80.16    |
| 100.0E-9                               |                        | 105.52   |
| 1.0E-6                                 |                        | 78.69    |
| 10.0E-6                                |                        | 88.98    |
| <b>RHIZOCARPIC ACID</b>                |                        |          |
| 10.0E-9                                |                        | 129.60   |
| 100.0E-9                               |                        | 115.67   |
| 1.0E-6                                 |                        | 78.90    |
| 10.0E-6                                |                        | 97.75    |
| <b>RHODINYL ACETATE</b>                |                        |          |
| 10.0E-9                                |                        | 121.74   |
| 100.0E-9                               |                        | 98.07    |
| 1.0E-6                                 |                        | 108.74   |
| 10.0E-6                                |                        | 73.85    |
| <b>RHODOCLADONIC ACID</b>              |                        |          |
| 10.0E-9                                |                        | 137.60   |
| 100.0E-9                               |                        | 133.54   |
| 1.0E-6                                 |                        | 106.07   |
| 10.0E-6                                |                        | 96.91    |
| <b>RHOIFOLIN</b>                       |                        |          |
| 10.0E-9                                |                        | 84.02    |
| 100.0E-9                               |                        | 114.79   |
| 1.0E-6                                 |                        | 106.13   |
| 10.0E-6                                |                        | 86.35    |
| <b>RIBAVIRIN</b>                       |                        |          |
| 10.0E-9                                |                        | 82.28    |
| 100.0E-9                               |                        | 100.64   |
| 1.0E-6                                 |                        | 71.47    |
| 10.0E-6                                |                        | 87.67    |
| <b>RIBOFLAVIN</b>                      |                        |          |
| 10.0E-9                                |                        | 93.96    |
| 100.0E-9                               |                        | 162.88   |
| 1.0E-6                                 |                        | 118.62   |
| 10.0E-6                                |                        | 132.42   |
| <b>RIBOFLAVIN 5-PHOSPHATE SODIUM</b>   |                        |          |
| 10.0E-9                                |                        | 99.96    |
| 100.0E-9                               |                        | 85.82    |
| 1.0E-6                                 |                        | 109.29   |
| 10.0E-6                                |                        | 143.54   |
| <b>RIFAMPIN</b>                        |                        |          |
| 10.0E-9                                |                        | 124.07   |
| 100.0E-9                               |                        | 120.70   |
| 1.0E-6                                 |                        | 123.82   |
| 10.0E-6                                |                        | 139.65   |
| <b>RIFAXIMIN</b>                       |                        |          |
| 10.0E-9                                |                        | 154.61   |
| 100.0E-9                               |                        | 114.47   |
| 1.0E-6                                 |                        | 81.28    |
| 10.0E-6                                |                        | 103.46   |
| <b>RIMANTADINE HYDROCHLORIDE</b>       |                        |          |
| 10.0E-9                                |                        | 79.12    |
| 100.0E-9                               |                        | 93.35    |
| 1.0E-6                                 |                        | 88.66    |
| 10.0E-6                                |                        | 136.50   |

| Compounds and Final Concentrations (M) | Average of % Viability | Hits (✓) |
|----------------------------------------|------------------------|----------|
| <b>RISEDRONATE SODIUM HYDRATE</b>      |                        | ✓        |
| 10.0E-9                                | 109.22                 |          |
| 100.0E-9                               | 90.52                  |          |
| 1.0E-6                                 | 95.48                  |          |
| 10.0E-6                                | 175.82                 |          |
| <b>RITANSERIN</b>                      |                        |          |
| 10.0E-9                                | 95.75                  |          |
| 100.0E-9                               | 102.58                 |          |
| 1.0E-6                                 | 125.95                 |          |
| 10.0E-6                                | 113.03                 |          |
| <b>RITODRINE HYDROCHLORIDE</b>         |                        |          |
| 10.0E-9                                | 74.41                  |          |
| 100.0E-9                               | 95.88                  |          |
| 1.0E-6                                 | 76.62                  |          |
| 10.0E-6                                | 148.95                 |          |
| <b>RIZATRIPTAN BENZOATE</b>            |                        |          |
| 10.0E-9                                | 79.19                  |          |
| 100.0E-9                               | 121.59                 |          |
| 1.0E-6                                 | 147.99                 |          |
| 10.0E-6                                | 109.27                 |          |
| <b>ROBUSTIC ACID</b>                   |                        |          |
| 10.0E-9                                | 105.08                 |          |
| 100.0E-9                               | 137.84                 |          |
| 1.0E-6                                 | 102.38                 |          |
| 10.0E-6                                | 88.95                  |          |
| <b>ROCCELLIC ACID</b>                  |                        |          |
| 10.0E-9                                | 71.68                  |          |
| 100.0E-9                               | 93.26                  |          |
| 1.0E-6                                 | 70.91                  |          |
| 10.0E-6                                | 88.74                  |          |
| <b>ROFECOXIB</b>                       |                        |          |
| 10.0E-9                                | 103.06                 |          |
| 100.0E-9                               | 91.48                  |          |
| 1.0E-6                                 | 118.10                 |          |
| 10.0E-6                                | 111.48                 |          |
| <b>ROLIPRAM</b>                        |                        | ✓        |
| 10.0E-9                                | 84.49                  |          |
| 100.0E-9                               | 91.08                  |          |
| 1.0E-6                                 | 108.41                 |          |
| 10.0E-6                                | 119.45                 |          |
| <b>ROLITETRACYCLINE</b>                |                        |          |
| 10.0E-9                                | 85.32                  |          |
| 100.0E-9                               | 108.44                 |          |
| 1.0E-6                                 | 68.65                  |          |
| 10.0E-6                                | 115.37                 |          |
| <b>RONIDAZOLE</b>                      |                        |          |
| 10.0E-9                                | 94.29                  |          |
| 100.0E-9                               | 132.12                 |          |
| 1.0E-6                                 | 83.55                  |          |
| 10.0E-6                                | 160.29                 |          |
| <b>ROPINIROLE</b>                      |                        |          |
| 10.0E-9                                | 120.76                 |          |
| 100.0E-9                               | 98.51                  |          |
| 1.0E-6                                 | 137.50                 |          |
| 10.0E-6                                | 85.41                  |          |
| <b>ROSIGLITAZONE</b>                   |                        |          |
| 10.0E-9                                | 134.84                 |          |
| 100.0E-9                               | 99.52                  |          |
| 1.0E-6                                 | 105.55                 |          |
| 10.0E-6                                | 93.17                  |          |
| <b>ROSMARINIC ACID</b>                 |                        |          |
| 10.0E-9                                | 121.95                 |          |
| 100.0E-9                               | 98.50                  |          |
| 1.0E-6                                 | 103.80                 |          |
| 10.0E-6                                | 120.67                 |          |
| <b>ROSOLIC ACID</b>                    |                        |          |
| 10.0E-9                                | 103.68                 |          |
| 100.0E-9                               | 89.64                  |          |
| 1.0E-6                                 | 112.27                 |          |
| 10.0E-6                                | 59.95                  |          |
| <b>ROSUVASTATIN CALCIUM</b>            |                        |          |
| 10.0E-9                                | 121.95                 |          |
| 100.0E-9                               | 115.40                 |          |
| 1.0E-6                                 | 87.96                  |          |
| 10.0E-6                                | 103.22                 |          |
| <b>ROTENONE</b>                        |                        |          |
| 10.0E-9                                | 82.03                  |          |
| 100.0E-9                               | 101.35                 |          |
| 1.0E-6                                 | 135.76                 |          |
| 10.0E-6                                | 95.12                  |          |
| <b>ROXARSONE</b>                       |                        |          |
| 10.0E-9                                | 113.47                 |          |
| 100.0E-9                               | 104.39                 |          |
| 1.0E-6                                 | 87.08                  |          |
| 10.0E-6                                | 76.02                  |          |

| Compounds and Final Concentrations (M) | Average of % Viability | Hits (✓) |
|----------------------------------------|------------------------|----------|
| <b>ROXITHROMYCIN</b>                   |                        |          |
| 10.0E-9                                |                        | 102.65   |
| 100.0E-9                               |                        | 111.47   |
| 1.0E-6                                 |                        | 69.44    |
| 10.0E-6                                |                        | 101.00   |
| <b>RUTILANTINONE</b>                   |                        |          |
| 10.0E-9                                |                        | 88.94    |
| 100.0E-9                               |                        | 109.85   |
| 1.0E-6                                 |                        | 112.28   |
| 10.0E-6                                |                        | 61.02    |
| <b>RUTOSIDE (rutin)</b>                |                        |          |
| 10.0E-9                                |                        | 94.84    |
| 100.0E-9                               |                        | 126.57   |
| 1.0E-6                                 |                        | 87.42    |
| 10.0E-6                                |                        | 80.75    |
| <b>SACCHARIN</b>                       |                        |          |
| 10.0E-9                                |                        | 321.86   |
| 100.0E-9                               |                        | 105.23   |
| 1.0E-6                                 |                        | 95.55    |
| 10.0E-6                                |                        | 63.22    |
| <b>SAFROLE</b>                         |                        |          |
| 10.0E-9                                |                        | 145.11   |
| 100.0E-9                               |                        | 96.76    |
| 1.0E-6                                 |                        | 113.66   |
| 10.0E-6                                |                        | 91.62    |
| <b>SALICIN</b>                         |                        |          |
| 10.0E-9                                |                        | 84.41    |
| 100.0E-9                               |                        | 141.47   |
| 1.0E-6                                 |                        | 105.67   |
| 10.0E-6                                |                        | 53.41    |
| <b>SALICYL ALCOHOL</b>                 |                        |          |
| 10.0E-9                                |                        | 128.76   |
| 100.0E-9                               |                        | 102.83   |
| 1.0E-6                                 |                        | 134.30   |
| 10.0E-6                                |                        | 95.38    |
| <b>SALICYLAMIDE</b>                    |                        |          |
| 10.0E-9                                |                        | 105.61   |
| 100.0E-9                               |                        | 122.22   |
| 1.0E-6                                 |                        | 92.38    |
| 10.0E-6                                |                        | 98.74    |
| <b>SALICYLANILIDE</b>                  |                        |          |
| 10.0E-9                                |                        | 106.55   |
| 100.0E-9                               |                        | 112.32   |
| 1.0E-6                                 |                        | 125.69   |
| 10.0E-6                                |                        | 92.10    |
| <b>SALIDROSIDE</b>                     |                        |          |
| 10.0E-9                                |                        | 94.85    |
| 100.0E-9                               |                        | 144.26   |
| 1.0E-6                                 |                        | 64.76    |
| 10.0E-6                                |                        | 93.40    |
| <b>SALINOMYCIN, SODIUM</b>             |                        |          |
| 10.0E-9                                |                        | 82.27    |
| 100.0E-9                               |                        | 81.00    |
| 1.0E-6                                 |                        | 78.09    |
| 10.0E-6                                |                        | 13.35    |
| <b>SALSALATE</b>                       |                        |          |
| 10.0E-9                                |                        | 123.79   |
| 100.0E-9                               |                        | 124.30   |
| 1.0E-6                                 |                        | 91.95    |
| 10.0E-6                                |                        | 86.93    |
| <b>SALSOLIDINE</b>                     |                        |          |
| 10.0E-9                                |                        | 94.93    |
| 100.0E-9                               |                        | 146.77   |
| 1.0E-6                                 |                        | 105.50   |
| 10.0E-6                                |                        | 88.11    |
| <b>SALSOLINE</b>                       |                        |          |
| 10.0E-9                                |                        | 82.66    |
| 100.0E-9                               |                        | 65.59    |
| 1.0E-6                                 |                        | 75.87    |
| 10.0E-6                                |                        | 116.26   |
| <b>SALSOLINOL HYDROBROMIDE</b>         |                        |          |
| 10.0E-9                                |                        | 59.04    |
| 100.0E-9                               |                        | 103.55   |
| 1.0E-6                                 |                        | 102.12   |
| 10.0E-6                                |                        | 73.60    |
| <b>SALVINORIN A</b>                    |                        |          |
| 10.0E-9                                |                        | 86.43    |
| 100.0E-9                               |                        | 154.66   |
| 1.0E-6                                 |                        | 125.98   |
| 10.0E-6                                |                        | 124.05   |
| <b>SANGUINARINE SULFATE</b>            |                        |          |
| 10.0E-9                                |                        | 83.47    |
| 100.0E-9                               |                        | 126.67   |
| 1.0E-6                                 |                        | 90.88    |
| 10.0E-6                                |                        | 60.13    |

| Compounds and Final Concentrations (M) | Average of % Viability | Hits (✓) |
|----------------------------------------|------------------------|----------|
| <b>SANTONIN</b>                        |                        |          |
| 10.0E-9                                |                        | 96.80    |
| 100.0E-9                               |                        | 110.80   |
| 1.0E-6                                 |                        | 98.36    |
| 10.0E-6                                |                        | 74.54    |
| <b>SAPPANONE A DIMETHYL ETHER</b>      |                        |          |
| 10.0E-9                                |                        | 157.50   |
| 100.0E-9                               |                        | 156.45   |
| 1.0E-6                                 |                        | 91.95    |
| 10.0E-6                                |                        | 70.77    |
| <b>SARAFLOXACIN HYDROCHLORIDE</b>      |                        |          |
| 10.0E-9                                |                        | 124.85   |
| 100.0E-9                               |                        | 98.70    |
| 1.0E-6                                 |                        | 101.00   |
| 10.0E-6                                |                        | 83.48    |
| <b>SARMENTOSIDE B</b>                  |                        |          |
| 10.0E-9                                |                        | 127.69   |
| 100.0E-9                               |                        | 97.43    |
| 1.0E-6                                 |                        | 120.96   |
| 10.0E-6                                |                        | 119.99   |
| <b>SCOPOLAMINE HYDROBROMIDE</b>        |                        |          |
| 10.0E-9                                |                        | 143.22   |
| 100.0E-9                               |                        | 120.09   |
| 1.0E-6                                 |                        | 105.15   |
| 10.0E-6                                |                        | 90.08    |
| <b>SCOPOLETIN</b>                      |                        |          |
| 10.0E-9                                |                        | 98.68    |
| 100.0E-9                               |                        | 114.49   |
| 1.0E-6                                 |                        | 134.96   |
| 10.0E-6                                |                        | 130.22   |
| <b>SECNIDAZOLE</b>                     |                        |          |
| 10.0E-9                                |                        | 82.26    |
| 100.0E-9                               |                        | 111.70   |
| 1.0E-6                                 |                        | 106.36   |
| 10.0E-6                                |                        | 34.11    |
| <b>SECURININE</b>                      |                        |          |
| 10.0E-9                                |                        | 107.82   |
| 100.0E-9                               |                        | 132.47   |
| 1.0E-6                                 |                        | 94.38    |
| 10.0E-6                                |                        | 44.06    |
| <b>SELAMECTIN</b>                      |                        |          |
| 10.0E-9                                |                        | 83.65    |
| 100.0E-9                               |                        | 123.87   |
| 1.0E-6                                 |                        | 83.28    |
| 10.0E-6                                |                        | -2.10    |
| <b>SELEGILINE HYDROCHLORIDE</b>        |                        |          |
| 10.0E-9                                |                        | 116.61   |
| 100.0E-9                               |                        | 119.95   |
| 1.0E-6                                 |                        | 90.19    |
| 10.0E-6                                |                        | 116.41   |
| <b>SEMUSTINE</b>                       |                        |          |
| 10.0E-9                                |                        | 127.00   |
| 100.0E-9                               |                        | 119.84   |
| 1.0E-6                                 |                        | 125.07   |
| 10.0E-6                                |                        | 100.29   |
| <b>SENNOSIDE A</b>                     |                        |          |
| 10.0E-9                                |                        | 101.91   |
| 100.0E-9                               |                        | 115.06   |
| 1.0E-6                                 |                        | 88.75    |
| 10.0E-6                                |                        | 110.69   |
| <b>SEROTONIN HYDROCHLORIDE</b>         |                        |          |
| 10.0E-9                                |                        | 83.79    |
| 100.0E-9                               |                        | 132.52   |
| 1.0E-6                                 |                        | 92.87    |
| 10.0E-6                                |                        | 102.97   |
| <b>SERTRALINE HYDROCHLORIDE</b>        |                        |          |
| 10.0E-9                                |                        | 87.06    |
| 100.0E-9                               |                        | 106.02   |
| 1.0E-6                                 |                        | 121.37   |
| 10.0E-6                                |                        | 87.91    |
| <b>SHIKIMIC ACID</b>                   |                        |          |
| 10.0E-9                                |                        | 85.28    |
| 100.0E-9                               |                        | 133.07   |
| 1.0E-6                                 |                        | 127.33   |
| 10.0E-6                                |                        | 95.91    |
| <b>SIBUTRAMINE HYDROCHLORIDE</b>       |                        |          |
| 10.0E-9                                |                        | 109.33   |
| 100.0E-9                               |                        | 99.89    |
| 1.0E-6                                 |                        | 120.48   |
| 10.0E-6                                |                        | 106.43   |
| <b>SILDENAFIL CITRATE</b>              |                        |          |
| 10.0E-9                                |                        | 122.14   |
| 100.0E-9                               |                        | 126.38   |
| 1.0E-6                                 |                        | 106.82   |
| 10.0E-6                                |                        | 115.28   |

| Compounds and Final Concentrations (M) |   | Average of % Viability | Hits (✓) |
|----------------------------------------|---|------------------------|----------|
| Row Labels                             |   |                        |          |
| <b>SILIBININ</b>                       |   |                        |          |
| 10.0E-9                                | ✓ |                        | 109.23   |
| 100.0E-9                               | ✓ |                        | 107.82   |
| 1.0E-6                                 | ✓ |                        | 94.72    |
| 10.0E-6                                | ✓ |                        | 107.28   |
| <b>SIMVASTATIN</b>                     |   |                        |          |
| 10.0E-9                                | ✓ |                        | 92.31    |
| 100.0E-9                               | ✓ |                        | 110.09   |
| 1.0E-6                                 | ✓ |                        | 115.81   |
| 10.0E-6                                | ✓ |                        | 65.16    |
| <b>SINENSETIN</b>                      |   |                        |          |
| 10.0E-9                                | ✓ |                        | 127.86   |
| 100.0E-9                               | ✓ |                        | 121.16   |
| 1.0E-6                                 | ✓ |                        | 121.99   |
| 10.0E-6                                | ✓ |                        | 103.09   |
| <b>SINOMENINE</b>                      |   |                        |          |
| 10.0E-9                                | ✓ |                        | 136.84   |
| 100.0E-9                               | ✓ |                        | 119.22   |
| 1.0E-6                                 | ✓ |                        | 105.42   |
| 10.0E-6                                | ✓ |                        | 117.40   |
| <b>SIROLIMUS</b>                       |   |                        |          |
| 10.0E-9                                | ✓ |                        | 124.28   |
| 100.0E-9                               | ✓ |                        | 89.25    |
| 1.0E-6                                 | ✓ |                        | 106.91   |
| 10.0E-6                                | ✓ |                        | 89.41    |
| <b>S-ISOCORYDINE (+)</b>               |   |                        |          |
| 10.0E-9                                | ✓ |                        | 132.36   |
| 100.0E-9                               | ✓ |                        | 121.22   |
| 1.0E-6                                 | ✓ |                        | 100.37   |
| 10.0E-6                                | ✓ |                        | 125.89   |
| <b>SISOMICIN SULFATE</b>               |   |                        |          |
| 10.0E-9                                | ✓ |                        | 131.31   |
| 100.0E-9                               | ✓ |                        | 122.22   |
| 1.0E-6                                 | ✓ |                        | 112.91   |
| 10.0E-6                                | ✓ |                        | 120.68   |
| <b>SITOSTERYL ACETATE</b>              |   |                        |          |
| 10.0E-9                                | ✓ |                        | 132.49   |
| 100.0E-9                               | ✓ |                        | 96.34    |
| 1.0E-6                                 | ✓ |                        | 94.80    |
| 10.0E-6                                | ✓ |                        | 118.44   |
| <b>SKATOLE</b>                         |   |                        |          |
| 10.0E-9                                | ✓ |                        | 121.56   |
| 100.0E-9                               | ✓ |                        | 102.10   |
| 1.0E-6                                 | ✓ |                        | 130.63   |
| 10.0E-6                                | ✓ |                        | 65.23    |
| <b>SMILAGENIN</b>                      |   |                        |          |
| 10.0E-9                                | ✓ |                        | 105.06   |
| 100.0E-9                               | ✓ |                        | 124.30   |
| 1.0E-6                                 | ✓ |                        | 142.84   |
| 10.0E-6                                | ✓ |                        | 84.53    |
| <b>SMILAGENIN ACETATE</b>              |   |                        |          |
| 10.0E-9                                | ✓ |                        | 105.41   |
| 100.0E-9                               | ✓ |                        | 102.69   |
| 1.0E-6                                 | ✓ |                        | 101.03   |
| 10.0E-6                                | ✓ |                        | 109.31   |
| <b>SODIUM DEHYDROCHOLATE</b>           |   |                        |          |
| 10.0E-9                                | ✓ |                        | 105.12   |
| 100.0E-9                               | ✓ |                        | 100.72   |
| 1.0E-6                                 | ✓ |                        | 91.50    |
| 10.0E-6                                | ✓ |                        | 130.81   |
| <b>SODIUM DEOXYCHOLATE</b>             |   |                        |          |
| 10.0E-9                                | ✓ |                        | 79.84    |
| 100.0E-9                               | ✓ |                        | 81.15    |
| 1.0E-6                                 | ✓ |                        | 96.81    |
| 10.0E-6                                | ✓ |                        | 132.84   |
| <b>SODIUM FLUOROACETATE</b>            |   |                        |          |
| 10.0E-9                                | ✓ |                        | 121.28   |
| 100.0E-9                               | ✓ |                        | 98.78    |
| 1.0E-6                                 | ✓ |                        | 121.84   |
| 10.0E-6                                | ✓ |                        | 118.86   |
| <b>SODIUM NITROPRUSSIDE</b>            |   |                        |          |
| 10.0E-9                                | ✓ |                        | 84.35    |
| 100.0E-9                               | ✓ |                        | 115.01   |
| 1.0E-6                                 | ✓ |                        | 85.41    |
| 10.0E-6                                | ✓ |                        | 156.14   |
| <b>SODIUM OXYBATE</b>                  |   |                        |          |
| 10.0E-9                                | ✓ |                        | 110.52   |
| 100.0E-9                               | ✓ |                        | 106.94   |
| 1.0E-6                                 | ✓ |                        | 98.35    |
| 10.0E-6                                | ✓ |                        | 92.12    |
| <b>SODIUM PHENYLACETATE</b>            |   |                        |          |
| 10.0E-9                                | ✓ |                        | 130.85   |
| 100.0E-9                               | ✓ |                        | 112.40   |
| 1.0E-6                                 | ✓ |                        | 121.54   |
| 10.0E-6                                | ✓ |                        | 90.12    |



| Compounds and Final Concentrations (M) | Average of % Viability | Hits (✓) |
|----------------------------------------|------------------------|----------|
| <b>SODIUM SALICYLATE</b>               |                        |          |
| 10.0E-9                                |                        | 109.31   |
| 100.0E-9                               |                        | 105.43   |
| 1.0E-6                                 |                        | 120.93   |
| 10.0E-6                                |                        | 111.90   |
| <b>SODIUM TETRADECYL SULFATE</b>       |                        |          |
| 10.0E-9                                |                        | 117.47   |
| 100.0E-9                               |                        | 109.99   |
| 1.0E-6                                 |                        | 82.64    |
| 10.0E-6                                |                        | 65.89    |
| <b>SODIUM THIOGLYCOLATE</b>            |                        |          |
| 10.0E-9                                |                        | 123.48   |
| 100.0E-9                               |                        | 132.53   |
| 1.0E-6                                 |                        | 88.56    |
| 10.0E-6                                |                        | 90.71    |
| <b>SOLANESOL</b>                       |                        |          |
| 10.0E-9                                |                        | 111.45   |
| 100.0E-9                               |                        | 57.55    |
| 1.0E-6                                 |                        | 89.61    |
| 10.0E-6                                |                        | 113.67   |
| <b>SOLANESYL ACETATE</b>               |                        |          |
| 10.0E-9                                |                        | 114.08   |
| 100.0E-9                               |                        | 97.84    |
| 1.0E-6                                 |                        | 77.16    |
| 10.0E-6                                |                        | 63.42    |
| <b>SOLASODINE</b>                      |                        |          |
| 10.0E-9                                |                        | 116.33   |
| 100.0E-9                               |                        | 126.17   |
| 1.0E-6                                 |                        | 144.31   |
| 10.0E-6                                |                        | 98.74    |
| <b>SOLIDAGENONE</b>                    |                        |          |
| 10.0E-9                                |                        | 111.24   |
| 100.0E-9                               |                        | 126.76   |
| 1.0E-6                                 |                        | 108.00   |
| 10.0E-6                                |                        | 83.51    |
| <b>SOLIFENACIN SUCCINATE</b>           |                        |          |
| 10.0E-9                                |                        | 103.57   |
| 100.0E-9                               |                        | 110.50   |
| 1.0E-6                                 |                        | 92.88    |
| 10.0E-6                                |                        | 117.99   |
| <b>SORBITOL</b>                        |                        |          |
| 10.0E-9                                |                        | 107.48   |
| 100.0E-9                               |                        | 137.20   |
| 1.0E-6                                 |                        | 121.98   |
| 10.0E-6                                |                        | 141.63   |
| <b>SOTALOL HYDROCHLORIDE</b>           |                        |          |
| 10.0E-9                                |                        | 121.98   |
| 100.0E-9                               |                        | 122.69   |
| 1.0E-6                                 |                        | 141.33   |
| 10.0E-6                                |                        | 101.89   |
| <b>SPARTEINE SULFATE</b>               |                        |          |
| 10.0E-9                                |                        | 106.34   |
| 100.0E-9                               |                        | 110.62   |
| 1.0E-6                                 |                        | 80.48    |
| 10.0E-6                                |                        | 81.80    |
| <b>SPECTINOMYCIN HYDROCHLORIDE</b>     |                        |          |
| 10.0E-9                                |                        | 117.31   |
| 100.0E-9                               |                        | 115.68   |
| 1.0E-6                                 |                        | 96.57    |
| 10.0E-6                                |                        | 97.06    |
| <b>SPERMINE</b>                        |                        |          |
| 10.0E-9                                |                        | 132.43   |
| 100.0E-9                               |                        | 131.85   |
| 1.0E-6                                 |                        | 128.33   |
| 10.0E-6                                |                        | 105.93   |
| <b>SPHONDIN</b>                        |                        |          |
| 10.0E-9                                |                        | 98.70    |
| 100.0E-9                               |                        | 99.28    |
| 1.0E-6                                 |                        | 78.91    |
| 10.0E-6                                |                        | 101.66   |
| <b>SPIPERONE</b>                       |                        |          |
| 10.0E-9                                |                        | 94.66    |
| 100.0E-9                               |                        | 77.89    |
| 1.0E-6                                 |                        | 92.54    |
| 10.0E-6                                |                        | 99.54    |
| <b>SPIRAMYCIN</b>                      |                        |          |
| 10.0E-9                                |                        | 106.72   |
| 100.0E-9                               |                        | 104.76   |
| 1.0E-6                                 |                        | 102.24   |
| 10.0E-6                                |                        | 88.66    |
| <b>SPIRONOLACTONE</b>                  |                        |          |
| 10.0E-9                                |                        | 71.89    |
| 100.0E-9                               |                        | 147.53   |
| 1.0E-6                                 |                        | 142.13   |
| 10.0E-6                                |                        | 89.64    |

| Compounds and Final Concentrations (M)       | Average of % Viability | Hits (✓) |
|----------------------------------------------|------------------------|----------|
| <b>SR-2640</b>                               |                        |          |
| 10.0E-9                                      |                        | 128.22   |
| 100.0E-9                                     |                        | 100.04   |
| 1.0E-6                                       |                        | 124.74   |
| 10.0E-6                                      |                        | 113.06   |
| <b>STICTIC ACID</b>                          |                        |          |
| 10.0E-9                                      |                        | 127.54   |
| 100.0E-9                                     |                        | 108.46   |
| 1.0E-6                                       |                        | 115.11   |
| 10.0E-6                                      |                        | 121.63   |
| <b>STIGMASTA-4,22-DIEN-3-ONE</b>             |                        |          |
| 10.0E-9                                      |                        | 101.32   |
| 100.0E-9                                     |                        | 135.35   |
| 1.0E-6                                       |                        | 95.54    |
| 10.0E-6                                      |                        | 118.02   |
| <b>STIGMASTEROL</b>                          |                        |          |
| 10.0E-9                                      |                        | 106.37   |
| 100.0E-9                                     |                        | 135.22   |
| 1.0E-6                                       |                        | 111.59   |
| 10.0E-6                                      |                        | 110.18   |
| <b>STREPTOMYCIN SULFATE</b>                  |                        |          |
| 10.0E-9                                      |                        | 88.38    |
| 100.0E-9                                     |                        | 106.18   |
| 1.0E-6                                       |                        | 120.85   |
| 10.0E-6                                      |                        | 114.16   |
| <b>STREPTOZOSIN</b>                          |                        |          |
| 10.0E-9                                      |                        | 84.96    |
| 100.0E-9                                     |                        | 92.04    |
| 1.0E-6                                       |                        | 72.70    |
| 10.0E-6                                      |                        | 125.71   |
| <b>STROPHANTHIDIN</b>                        |                        |          |
| 10.0E-9                                      |                        | 91.98    |
| 100.0E-9                                     |                        | 107.68   |
| 1.0E-6                                       |                        | 100.02   |
| 10.0E-6                                      |                        | 101.03   |
| <b>STROPHANTHIDINIC ACID LACTONE ACETATE</b> |                        |          |
| 10.0E-9                                      |                        | 119.33   |
| 100.0E-9                                     |                        | 120.64   |
| 1.0E-6                                       |                        | 98.75    |
| 10.0E-6                                      |                        | 106.35   |
| <b>STRYCHNINE</b>                            |                        |          |
| 10.0E-9                                      |                        | 83.20    |
| 100.0E-9                                     |                        | 81.08    |
| 1.0E-6                                       |                        | 98.59    |
| 10.0E-6                                      |                        | 105.13   |
| <b>STRYCHNINE METHIODIDE</b>                 |                        |          |
| 10.0E-9                                      |                        | 116.45   |
| 100.0E-9                                     |                        | 118.08   |
| 1.0E-6                                       |                        | 112.61   |
| 10.0E-6                                      |                        | 98.60    |
| <b>SUCCINYLSULFATHIAZOLE</b>                 |                        |          |
| 10.0E-9                                      |                        | 82.58    |
| 100.0E-9                                     |                        | 132.10   |
| 1.0E-6                                       |                        | 73.81    |
| 10.0E-6                                      |                        | 137.59   |
| <b>SUCRALFATE SODIUM (10% w/v in DMSO)</b>   |                        |          |
| 10.0E-9                                      |                        | 103.72   |
| 100.0E-9                                     |                        | 146.71   |
| 1.0E-6                                       |                        | 119.36   |
| 10.0E-6                                      |                        | 96.98    |
| <b>SUCRALOSE</b>                             |                        |          |
| 10.0E-9                                      |                        | 112.95   |
| 100.0E-9                                     |                        | 107.11   |
| 1.0E-6                                       |                        | 113.66   |
| 10.0E-6                                      |                        | 128.77   |
| <b>SULCONAZOLE NITRATE</b>                   |                        |          |
| 10.0E-9                                      |                        | 90.76    |
| 100.0E-9                                     |                        | 80.09    |
| 1.0E-6                                       |                        | 58.88    |
| 10.0E-6                                      |                        | 39.42    |
| <b>SULFABENZAMIDE</b>                        |                        |          |
| 10.0E-9                                      |                        | 98.21    |
| 100.0E-9                                     |                        | 104.13   |
| 1.0E-6                                       |                        | 102.89   |
| 10.0E-6                                      |                        | 124.36   |
| <b>SULFACETAMIDE</b>                         |                        |          |
| 10.0E-9                                      |                        | 115.72   |
| 100.0E-9                                     |                        | 82.96    |
| 1.0E-6                                       |                        | 94.62    |
| 10.0E-6                                      |                        | 102.16   |
| <b>SULFACHLORPYRIDAZINE</b>                  |                        |          |
| 10.0E-9                                      |                        | 88.55    |
| 100.0E-9                                     |                        | 111.50   |
| 1.0E-6                                       |                        | 121.55   |
| 10.0E-6                                      |                        | 166.57   |

| Compounds and Final Concentrations (M) |  | Average of % Viability | Hits (✓) |
|----------------------------------------|--|------------------------|----------|
| Row Labels                             |  |                        |          |
| <b>SULFADIAZINE</b>                    |  |                        |          |
| 10.0E-9                                |  |                        | 121.32   |
| 100.0E-9                               |  |                        | 111.86   |
| 1.0E-6                                 |  |                        | 91.20    |
| 10.0E-6                                |  |                        | 71.70    |
| <b>SULFADIMETHOXINE</b>                |  |                        |          |
| 10.0E-9                                |  |                        | 89.33    |
| 100.0E-9                               |  |                        | 100.39   |
| 1.0E-6                                 |  |                        | 78.48    |
| 10.0E-6                                |  |                        | 99.38    |
| <b>SULFADOXINE</b>                     |  |                        |          |
| 10.0E-9                                |  |                        | 82.80    |
| 100.0E-9                               |  |                        | 87.31    |
| 1.0E-6                                 |  |                        | 86.88    |
| 10.0E-6                                |  |                        | 108.70   |
| <b>SULFAMERAZINE</b>                   |  |                        |          |
| 10.0E-9                                |  |                        | 97.72    |
| 100.0E-9                               |  |                        | 151.80   |
| 1.0E-6                                 |  |                        | 116.33   |
| 10.0E-6                                |  |                        | 113.58   |
| <b>SULFAMETER</b>                      |  |                        |          |
| 10.0E-9                                |  |                        | 107.76   |
| 100.0E-9                               |  |                        | 128.65   |
| 1.0E-6                                 |  |                        | 86.08    |
| 10.0E-6                                |  |                        | 129.27   |
| <b>SULFAMETHAZINE</b>                  |  |                        |          |
| 10.0E-9                                |  |                        | 118.43   |
| 100.0E-9                               |  |                        | 149.97   |
| 1.0E-6                                 |  |                        | 163.49   |
| 10.0E-6                                |  |                        | 102.09   |
| <b>SULFAMETHIZOLE</b>                  |  |                        |          |
| 10.0E-9                                |  |                        | 154.09   |
| 100.0E-9                               |  |                        | 101.60   |
| 1.0E-6                                 |  |                        | 99.80    |
| 10.0E-6                                |  |                        | 102.35   |
| <b>SULFAMETHOXAZOLE</b>                |  |                        |          |
| 10.0E-9                                |  |                        | 108.12   |
| 100.0E-9                               |  |                        | 133.02   |
| 1.0E-6                                 |  |                        | 112.62   |
| 10.0E-6                                |  |                        | 98.42    |
| <b>SULFAMETHOXYPYRIDAZINE</b>          |  |                        |          |
| 10.0E-9                                |  |                        | 113.96   |
| 100.0E-9                               |  |                        | 94.66    |
| 1.0E-6                                 |  |                        | 86.48    |
| 10.0E-6                                |  |                        | 118.96   |
| <b>SULFAMONOMETHOXINE</b>              |  |                        |          |
| 10.0E-9                                |  |                        | 83.57    |
| 100.0E-9                               |  |                        | 84.60    |
| 1.0E-6                                 |  |                        | 87.01    |
| 10.0E-6                                |  |                        | 116.90   |
| <b>SULFANILATE ZINC</b>                |  |                        |          |
| 10.0E-9                                |  |                        | 87.67    |
| 100.0E-9                               |  |                        | 122.68   |
| 1.0E-6                                 |  |                        | 116.25   |
| 10.0E-6                                |  |                        | 97.80    |
| <b>SULFANITRAN</b>                     |  |                        |          |
| 10.0E-9                                |  |                        | 123.78   |
| 100.0E-9                               |  |                        | 103.41   |
| 1.0E-6                                 |  |                        | 95.89    |
| 10.0E-6                                |  |                        | 113.46   |
| <b>SULFAPHENAZOLE</b>                  |  |                        |          |
| 10.0E-9                                |  |                        | 123.48   |
| 100.0E-9                               |  |                        | 114.67   |
| 1.0E-6                                 |  |                        | 113.81   |
| 10.0E-6                                |  |                        | 86.35    |
| <b>SULFAPYRIDINE</b>                   |  |                        |          |
| 10.0E-9                                |  |                        | 109.42   |
| 100.0E-9                               |  |                        | 134.70   |
| 1.0E-6                                 |  |                        | 96.33    |
| 10.0E-6                                |  |                        | 124.48   |
| <b>SULFAQUINOXALINE SODIUM</b>         |  |                        |          |
| 10.0E-9                                |  |                        | 80.16    |
| 100.0E-9                               |  |                        | 103.92   |
| 1.0E-6                                 |  |                        | 110.08   |
| 10.0E-6                                |  |                        | 103.53   |
| <b>SULFASALAZINE</b>                   |  |                        |          |
| 10.0E-9                                |  |                        | 94.93    |
| 100.0E-9                               |  |                        | 98.51    |
| 1.0E-6                                 |  |                        | 72.67    |
| 10.0E-6                                |  |                        | 147.91   |
| <b>SULFATHIAZOLE</b>                   |  |                        |          |
| 10.0E-9                                |  |                        | 100.12   |
| 100.0E-9                               |  |                        | 109.15   |
| 1.0E-6                                 |  |                        | 73.05    |
| 10.0E-6                                |  |                        | 110.55   |

| Compounds and Final Concentrations (M) | Average of % Viability | Hits (✓) |
|----------------------------------------|------------------------|----------|
| <b>SULFINPYRAZONE</b>                  |                        |          |
| 10.0E-9                                |                        | 93.77    |
| 100.0E-9                               |                        | 113.52   |
| 1.0E-6                                 |                        | 113.02   |
| 10.0E-6                                |                        | 110.93   |
| <b>SULFISOXAZOLE</b>                   |                        |          |
| 10.0E-9                                |                        | 88.13    |
| 100.0E-9                               |                        | 106.18   |
| 1.0E-6                                 |                        | 81.51    |
| 10.0E-6                                |                        | 98.54    |
| <b>SULFISOXAZOLE ACETYL</b>            |                        |          |
| 10.0E-9                                |                        | 61.71    |
| 100.0E-9                               |                        | 107.21   |
| 1.0E-6                                 |                        | 127.18   |
| 10.0E-6                                |                        | 86.25    |
| <b>SULINDAC</b>                        |                        |          |
| 10.0E-9                                |                        | 106.24   |
| 100.0E-9                               |                        | 85.24    |
| 1.0E-6                                 |                        | 79.80    |
| 10.0E-6                                |                        | 101.84   |
| <b>SULMAZOLE</b>                       |                        |          |
| 10.0E-9                                |                        | 105.62   |
| 100.0E-9                               |                        | 135.65   |
| 1.0E-6                                 |                        | 104.53   |
| 10.0E-6                                |                        | 74.71    |
| <b>SULOCTIDIL</b>                      |                        |          |
| 10.0E-9                                |                        | 111.41   |
| 100.0E-9                               |                        | 113.52   |
| 1.0E-6                                 |                        | 91.02    |
| 10.0E-6                                |                        | -0.87    |
| <b>SULPIRIDE</b>                       |                        |          |
| 10.0E-9                                |                        | 104.13   |
| 100.0E-9                               |                        | 131.69   |
| 1.0E-6                                 |                        | 147.69   |
| 10.0E-6                                |                        | 107.63   |
| <b>SUPROFEN</b>                        |                        |          |
| 10.0E-9                                |                        | 139.03   |
| 100.0E-9                               |                        | 89.07    |
| 1.0E-6                                 |                        | 112.35   |
| 10.0E-6                                |                        | 132.40   |
| <b>SURAMIN</b>                         |                        |          |
| 10.0E-9                                |                        | 149.97   |
| 100.0E-9                               |                        | 113.64   |
| 1.0E-6                                 |                        | 100.75   |
| 10.0E-6                                |                        | 114.78   |
| <b>SUXIBUZONE</b>                      |                        |          |
| 10.0E-9                                |                        | 131.21   |
| 100.0E-9                               |                        | 161.87   |
| 1.0E-6                                 |                        | 145.78   |
| 10.0E-6                                |                        | 84.63    |
| <b>SYRINGIC ACID</b>                   |                        |          |
| 10.0E-9                                |                        | 93.42    |
| 100.0E-9                               |                        | 118.90   |
| 1.0E-6                                 |                        | 108.29   |
| 10.0E-6                                |                        | 77.51    |
| <b>TACRINE HYDROCHLORIDE</b>           |                        |          |
| 10.0E-9                                |                        | 132.36   |
| 100.0E-9                               |                        | 118.38   |
| 1.0E-6                                 |                        | 107.48   |
| 10.0E-6                                |                        | 102.63   |
| <b>TACROLIMUS</b>                      |                        |          |
| 10.0E-9                                |                        | 98.58    |
| 100.0E-9                               |                        | 103.37   |
| 1.0E-6                                 |                        | 122.42   |
| 10.0E-6                                |                        | 89.37    |
| <b>TADALAFIL</b>                       |                        |          |
| 10.0E-9                                |                        | 111.27   |
| 100.0E-9                               |                        | 97.69    |
| 1.0E-6                                 |                        | 99.33    |
| 10.0E-6                                |                        | 142.71   |
| <b>TAMOXIFEN CITRATE</b>               |                        |          |
| 10.0E-9                                |                        | 73.20    |
| 100.0E-9                               |                        | 87.07    |
| 1.0E-6                                 |                        | 73.88    |
| 10.0E-6                                |                        | 62.73    |
| <b>TANGERITIN</b>                      |                        |          |
| 10.0E-9                                |                        | 110.19   |
| 100.0E-9                               |                        | 103.78   |
| 1.0E-6                                 |                        | 116.33   |
| 10.0E-6                                |                        | 87.14    |
| <b>TANNIC ACID</b>                     |                        |          |
| 10.0E-9                                |                        | 83.80    |
| 100.0E-9                               |                        | 128.23   |
| 1.0E-6                                 |                        | 79.82    |
| 10.0E-6                                |                        | 82.82    |

| Compounds and Final Concentrations (M) | Average of % Viability | Hits (✓) |
|----------------------------------------|------------------------|----------|
| <b>TANSHINONE IIA</b>                  |                        |          |
| 10.0E-9                                |                        | 109.20   |
| 100.0E-9                               |                        | 128.16   |
| 1.0E-6                                 |                        | 114.22   |
| 10.0E-6                                |                        | 85.88    |
| <b>TANSHINONE IIA SULFONATE SODIUM</b> |                        |          |
| 10.0E-9                                |                        | 96.26    |
| 100.0E-9                               |                        | 92.40    |
| 1.0E-6                                 |                        | 90.13    |
| 10.0E-6                                |                        | 105.43   |
| <b>TAPENTADOL HYDROCHLORIDE</b>        |                        |          |
| 10.0E-9                                |                        | 116.58   |
| 100.0E-9                               |                        | 105.84   |
| 1.0E-6                                 |                        | 115.99   |
| 10.0E-6                                |                        | 137.93   |
| <b>TARTARIC ACID</b>                   |                        |          |
| 10.0E-9                                |                        | 99.09    |
| 100.0E-9                               |                        | 123.99   |
| 1.0E-6                                 |                        | 124.28   |
| 10.0E-6                                |                        | 135.88   |
| <b>TAURINE</b>                         |                        |          |
| 10.0E-9                                |                        | 91.11    |
| 100.0E-9                               |                        | 140.50   |
| 1.0E-6                                 |                        | 105.50   |
| 10.0E-6                                |                        | 124.30   |
| <b>TEICOPLANIN [A(2-1) shown]</b>      |                        |          |
| 10.0E-9                                |                        | 95.68    |
| 100.0E-9                               |                        | 98.99    |
| 1.0E-6                                 |                        | 95.45    |
| 10.0E-6                                |                        | 65.87    |
| <b>TELENZEPINE HYDROCHLORIDE</b>       |                        |          |
| 10.0E-9                                |                        | 99.13    |
| 100.0E-9                               |                        | 86.22    |
| 1.0E-6                                 |                        | 101.74   |
| 10.0E-6                                |                        | 107.97   |
| <b>TELITHROMYCIN</b>                   |                        |          |
| 10.0E-9                                |                        | 100.97   |
| 100.0E-9                               |                        | 116.17   |
| 1.0E-6                                 |                        | 90.51    |
| 10.0E-6                                |                        | 114.93   |
| <b>TEMEFOS</b>                         |                        |          |
| 10.0E-9                                |                        | 119.82   |
| 100.0E-9                               |                        | 97.12    |
| 1.0E-6                                 |                        | 94.08    |
| 10.0E-6                                |                        | 142.75   |
| <b>TENIPOSIDE</b>                      |                        |          |
| 10.0E-9                                |                        | 101.47   |
| 100.0E-9                               |                        | 74.08    |
| 1.0E-6                                 |                        | 63.82    |
| 10.0E-6                                |                        | 31.16    |
| <b>TENOXCICAM</b>                      |                        |          |
| 10.0E-9                                |                        | 96.70    |
| 100.0E-9                               |                        | 72.93    |
| 1.0E-6                                 |                        | 104.00   |
| 10.0E-6                                |                        | 109.83   |
| <b>TERAZOSIN HYDROCHLORIDE</b>         |                        |          |
| 10.0E-9                                |                        | 110.85   |
| 100.0E-9                               |                        | 91.48    |
| 1.0E-6                                 |                        | 134.50   |
| 10.0E-6                                |                        | 127.67   |
| <b>TERBINAFINE HYDROCHLORIDE</b>       |                        |          |
| 10.0E-9                                |                        | 118.48   |
| 100.0E-9                               |                        | 112.47   |
| 1.0E-6                                 |                        | 134.88   |
| 10.0E-6                                |                        | 105.55   |
| <b>TERBUTALINE HEMISULFATE</b>         |                        |          |
| 10.0E-9                                |                        | 110.30   |
| 100.0E-9                               |                        | 104.92   |
| 1.0E-6                                 |                        | 90.36    |
| 10.0E-6                                |                        | 97.06    |
| <b>TERFENADINE</b>                     |                        |          |
| 10.0E-9                                |                        | 106.13   |
| 100.0E-9                               |                        | 115.20   |
| 1.0E-6                                 |                        | 157.07   |
| 10.0E-6                                |                        | 135.93   |
| <b>TESTOSTERONE</b>                    |                        |          |
| 10.0E-9                                |                        | 100.15   |
| 100.0E-9                               |                        | 81.35    |
| 1.0E-6                                 |                        | 85.15    |
| 10.0E-6                                |                        | 78.75    |
| <b>TESTOSTERONE PROPIONATE</b>         |                        |          |
| 10.0E-9                                |                        | 98.83    |
| 100.0E-9                               |                        | 98.36    |
| 1.0E-6                                 |                        | 94.22    |
| 10.0E-6                                |                        | 94.21    |

| Compounds and Final Concentrations (M)       | Average of % Viability | Hits (✓) |
|----------------------------------------------|------------------------|----------|
| <b>TETRACAINE HYDROCHLORIDE</b>              |                        |          |
| 10.0E-9                                      |                        | 86.05    |
| 100.0E-9                                     |                        | 107.36   |
| 1.0E-6                                       |                        | 96.57    |
| 10.0E-6                                      |                        | 128.61   |
| <b>TETRACHLOROISOPHTHALONITRILE</b>          |                        |          |
| 10.0E-9                                      |                        | 114.85   |
| 100.0E-9                                     |                        | 85.21    |
| 1.0E-6                                       |                        | 143.20   |
| 10.0E-6                                      |                        | 14.08    |
| <b>TETRACYCLINE HYDROCHLORIDE</b>            |                        |          |
| 10.0E-9                                      |                        | 124.88   |
| 100.0E-9                                     |                        | 99.49    |
| 1.0E-6                                       |                        | 104.65   |
| 10.0E-6                                      |                        | 100.54   |
| <b>TETRAHYDROGAMBOGIC ACID</b>               |                        |          |
| 10.0E-9                                      |                        | 102.77   |
| 100.0E-9                                     |                        | 137.09   |
| 1.0E-6                                       |                        | 123.86   |
| 10.0E-6                                      |                        | 87.86    |
| <b>TETRAHYDROSAPPANONE A TRIMETHYL ETHER</b> |                        |          |
| 10.0E-9                                      |                        | 69.70    |
| 100.0E-9                                     |                        | 117.32   |
| 1.0E-6                                       |                        | 102.67   |
| 10.0E-6                                      |                        | 119.42   |
| <b>TETRAHYDROZOLINE HYDROCHLORIDE</b>        |                        |          |
| 10.0E-9                                      |                        | 119.56   |
| 100.0E-9                                     |                        | 102.67   |
| 1.0E-6                                       |                        | 115.28   |
| 10.0E-6                                      |                        | 112.29   |
| <b>TETRAMIZOLE HYDROCHLORIDE</b>             |                        |          |
| 10.0E-9                                      |                        | 100.91   |
| 100.0E-9                                     |                        | 126.85   |
| 1.0E-6                                       |                        | 114.31   |
| 10.0E-6                                      |                        | 85.18    |
| <b>TETRANDRINE</b>                           |                        |          |
| 10.0E-9                                      |                        | 89.79    |
| 100.0E-9                                     |                        | 121.72   |
| 1.0E-6                                       |                        | 88.62    |
| 10.0E-6                                      |                        | 1.81     |
| <b>TETROQUINONE</b>                          |                        |          |
| 10.0E-9                                      |                        | 88.42    |
| 100.0E-9                                     |                        | 113.26   |
| 1.0E-6                                       |                        | 134.68   |
| 10.0E-6                                      |                        | 110.93   |
| <b>THALIDOMIDE</b>                           |                        |          |
| 10.0E-9                                      |                        | 83.50    |
| 100.0E-9                                     |                        | 102.20   |
| 1.0E-6                                       |                        | 128.68   |
| 10.0E-6                                      |                        | 92.93    |
| <b>THEAFLAVIN</b>                            |                        |          |
| 10.0E-9                                      |                        | 87.12    |
| 100.0E-9                                     |                        | 106.63   |
| 1.0E-6                                       |                        | 112.44   |
| 10.0E-6                                      |                        | 88.98    |
| <b>THEAFLAVIN DIGALLATE</b>                  |                        |          |
| 10.0E-9                                      |                        | 87.29    |
| 100.0E-9                                     |                        | 131.02   |
| 1.0E-6                                       |                        | 146.23   |
| 10.0E-6                                      |                        | 97.74    |
| <b>THEAFLAVIN MONOGALLATES</b>               |                        |          |
| 10.0E-9                                      |                        | 118.43   |
| 100.0E-9                                     |                        | 94.42    |
| 1.0E-6                                       |                        | 121.56   |
| 10.0E-6                                      |                        | 82.71    |
| <b>THEANINE</b>                              |                        |          |
| 10.0E-9                                      |                        | 134.85   |
| 100.0E-9                                     |                        | 111.23   |
| 1.0E-6                                       |                        | 140.35   |
| 10.0E-6                                      |                        | 122.44   |
| <b>THEOPHYLLINE</b>                          |                        |          |
| 10.0E-9                                      |                        | 124.12   |
| 100.0E-9                                     |                        | 102.92   |
| 1.0E-6                                       |                        | 105.15   |
| 10.0E-6                                      |                        | 93.13    |
| <b>THERMOPSINE PERCHLORATE</b>               |                        |          |
| 10.0E-9                                      |                        | 107.56   |
| 100.0E-9                                     |                        | 97.54    |
| 1.0E-6                                       |                        | 110.69   |
| 10.0E-6                                      |                        | 109.29   |
| <b>THIABENDAZOLE</b>                         |                        |          |
| 10.0E-9                                      |                        | 114.49   |
| 100.0E-9                                     |                        | 66.34    |
| 1.0E-6                                       |                        | 98.09    |
| 10.0E-6                                      |                        | 49.89    |

| Compounds and Final Concentrations (M) | Average of % Viability | Hits (✓) |
|----------------------------------------|------------------------|----------|
| <b>THIAMINE</b>                        |                        |          |
| 10.0E-9                                |                        | 102.52   |
| 100.0E-9                               |                        | 110.61   |
| 1.0E-6                                 |                        | 123.22   |
| 10.0E-6                                |                        | 130.91   |
| <b>THIAMPHENICOL</b>                   |                        |          |
| 10.0E-9                                |                        | 73.40    |
| 100.0E-9                               |                        | 109.00   |
| 1.0E-6                                 |                        | 146.14   |
| 10.0E-6                                |                        | 82.81    |
| <b>THIAMYLAL SODIUM</b>                |                        |          |
| 10.0E-9                                |                        | 113.86   |
| 100.0E-9                               |                        | 132.58   |
| 1.0E-6                                 |                        | 127.10   |
| 10.0E-6                                |                        | 108.02   |
| <b>THIMEROSAL</b>                      |                        |          |
| 10.0E-9                                |                        | 83.45    |
| 100.0E-9                               |                        | 93.32    |
| 1.0E-6                                 |                        | 38.62    |
| 10.0E-6                                |                        | 1.11     |
| <b>THIOCTIC ACID</b>                   |                        |          |
| 10.0E-9                                |                        | 101.94   |
| 100.0E-9                               |                        | 58.48    |
| 1.0E-6                                 |                        | 96.53    |
| 10.0E-6                                |                        | 133.74   |
| <b>THIOGUANINE</b>                     |                        |          |
| 10.0E-9                                |                        | 102.55   |
| 100.0E-9                               |                        | 111.04   |
| 1.0E-6                                 |                        | 98.35    |
| 10.0E-6                                |                        | 93.32    |
| <b>THIOGUANOSINE</b>                   |                        |          |
| 10.0E-9                                |                        | 107.72   |
| 100.0E-9                               |                        | 60.54    |
| 1.0E-6                                 |                        | 133.49   |
| 10.0E-6                                |                        | 83.65    |
| <b>THIOPENTAL SODIUM</b>               |                        |          |
| 10.0E-9                                |                        | 86.56    |
| 100.0E-9                               |                        | 109.26   |
| 1.0E-6                                 |                        | 72.48    |
| 10.0E-6                                |                        | 95.26    |
| <b>THIORIDAZINE HYDROCHLORIDE</b>      |                        |          |
| 10.0E-9                                |                        | 84.08    |
| 100.0E-9                               |                        | 76.86    |
| 1.0E-6                                 |                        | 83.08    |
| 10.0E-6                                |                        | 77.12    |
| <b>THIOTEPA</b>                        |                        |          |
| 10.0E-9                                |                        | 151.01   |
| 100.0E-9                               |                        | 97.92    |
| 1.0E-6                                 |                        | 91.39    |
| 10.0E-6                                |                        | 77.82    |
| <b>THIOTHIXENE</b>                     |                        |          |
| 10.0E-9                                |                        | 90.25    |
| 100.0E-9                               |                        | 69.09    |
| 1.0E-6                                 |                        | 107.15   |
| 10.0E-6                                |                        | 60.21    |
| <b>THIRAM</b>                          |                        |          |
| 10.0E-9                                |                        | 78.95    |
| 100.0E-9                               |                        | 130.29   |
| 1.0E-6                                 |                        | 0.15     |
| 10.0E-6                                |                        | -2.10    |
| <b>THONZYLAMINE HYDROCHLORIDE</b>      |                        |          |
| 10.0E-9                                |                        | 104.58   |
| 100.0E-9                               |                        | 114.12   |
| 1.0E-6                                 |                        | 90.42    |
| 10.0E-6                                |                        | 34.31    |
| <b>THYMOQUINONE</b>                    |                        |          |
| 10.0E-9                                |                        | 112.33   |
| 100.0E-9                               |                        | 145.69   |
| 1.0E-6                                 |                        | 88.35    |
| 10.0E-6                                |                        | 2.70     |
| <b>TIAPRIDE HYDROCHLORIDE</b>          |                        |          |
| 10.0E-9                                |                        | 106.50   |
| 100.0E-9                               |                        | 117.34   |
| 1.0E-6                                 |                        | 80.90    |
| 10.0E-6                                |                        | 136.85   |
| <b>TICARCILLIN DISODIUM</b>            |                        |          |
| 10.0E-9                                |                        | 87.17    |
| 100.0E-9                               |                        | 128.35   |
| 1.0E-6                                 |                        | 115.11   |
| 10.0E-6                                |                        | 105.63   |
| <b>TICLOPIDINE HYDROCHLORIDE</b>       |                        |          |
| 10.0E-9                                |                        | 132.60   |
| 100.0E-9                               |                        | 100.60   |
| 1.0E-6                                 |                        | 121.63   |
| 10.0E-6                                |                        | 106.02   |

| Compounds and Final Concentrations (M) |  | Average of % Viability | Hits (✓) |
|----------------------------------------|--|------------------------|----------|
| Row Labels                             |  |                        |          |
| <b>TIGOGENIN</b>                       |  |                        |          |
| 10.0E-9                                |  | 152.52                 |          |
| 100.0E-9                               |  | 115.17                 |          |
| 1.0E-6                                 |  | 133.58                 |          |
| 10.0E-6                                |  | 119.53                 |          |
| <b>TILMICOSIN</b>                      |  |                        |          |
| 10.0E-9                                |  | 148.83                 |          |
| 100.0E-9                               |  | 119.95                 |          |
| 1.0E-6                                 |  | 126.83                 |          |
| 10.0E-6                                |  | 119.01                 |          |
| <b>TILORONE</b>                        |  |                        |          |
| 10.0E-9                                |  | 146.32                 | ✓        |
| 100.0E-9                               |  | 147.88                 |          |
| 1.0E-6                                 |  | 73.01                  |          |
| 10.0E-6                                |  | 4.29                   |          |
| <b>TIMOLOL MALEATE</b>                 |  |                        |          |
| 10.0E-9                                |  | 96.74                  |          |
| 100.0E-9                               |  | 104.34                 |          |
| 1.0E-6                                 |  | 101.28                 |          |
| 10.0E-6                                |  | 127.45                 |          |
| <b>TIMONACIC</b>                       |  |                        |          |
| 10.0E-9                                |  | 105.44                 |          |
| 100.0E-9                               |  | 93.82                  |          |
| 1.0E-6                                 |  | 99.05                  |          |
| 10.0E-6                                |  | 133.68                 |          |
| <b>TINIDAZOLE</b>                      |  |                        |          |
| 10.0E-9                                |  | 107.48                 |          |
| 100.0E-9                               |  | 100.75                 |          |
| 1.0E-6                                 |  | 117.49                 |          |
| 10.0E-6                                |  | 89.81                  |          |
| <b>TIOCONAZOLE</b>                     |  |                        |          |
| 10.0E-9                                |  | 92.53                  |          |
| 100.0E-9                               |  | 115.88                 |          |
| 1.0E-6                                 |  | 78.79                  |          |
| 10.0E-6                                |  | 71.26                  |          |
| <b>TIOXOLONE</b>                       |  |                        |          |
| 10.0E-9                                |  | 107.35                 |          |
| 100.0E-9                               |  | 130.41                 |          |
| 1.0E-6                                 |  | 123.94                 |          |
| 10.0E-6                                |  | 70.10                  |          |
| <b>TIRATRICOL</b>                      |  |                        |          |
| 10.0E-9                                |  | 76.02                  |          |
| 100.0E-9                               |  | 92.64                  |          |
| 1.0E-6                                 |  | 85.82                  |          |
| 10.0E-6                                |  | 80.55                  |          |
| <b>TOBRAMYCIN</b>                      |  |                        |          |
| 10.0E-9                                |  | 88.35                  |          |
| 100.0E-9                               |  | 106.13                 |          |
| 1.0E-6                                 |  | 117.71                 |          |
| 10.0E-6                                |  | 112.61                 |          |
| <b>TODRALAZINE HYDROCHLORIDE</b>       |  |                        |          |
| 10.0E-9                                |  | 75.52                  |          |
| 100.0E-9                               |  | 103.14                 |          |
| 1.0E-6                                 |  | 90.09                  |          |
| 10.0E-6                                |  | 79.22                  |          |
| <b>TOLAZAMIDE</b>                      |  |                        |          |
| 10.0E-9                                |  | 98.15                  |          |
| 100.0E-9                               |  | 111.60                 |          |
| 1.0E-6                                 |  | 99.55                  |          |
| 10.0E-6                                |  | 106.60                 |          |
| <b>TOLAZOLINE HYDROCHLORIDE</b>        |  |                        |          |
| 10.0E-9                                |  | 93.85                  |          |
| 100.0E-9                               |  | 84.85                  |          |
| 1.0E-6                                 |  | 76.12                  |          |
| 10.0E-6                                |  | 105.38                 |          |
| <b>TOLBUTAMIDE</b>                     |  |                        |          |
| 10.0E-9                                |  | 86.05                  |          |
| 100.0E-9                               |  | 128.64                 |          |
| 1.0E-6                                 |  | 103.61                 |          |
| 10.0E-6                                |  | 121.39                 |          |
| <b>TOLFENAMIC ACID</b>                 |  |                        |          |
| 10.0E-9                                |  | 121.58                 |          |
| 100.0E-9                               |  | 104.17                 |          |
| 1.0E-6                                 |  | 137.11                 |          |
| 10.0E-6                                |  | 106.64                 |          |
| <b>TOLMETIN SODIUM</b>                 |  |                        |          |
| 10.0E-9                                |  | 122.21                 |          |
| 100.0E-9                               |  | 94.78                  |          |
| 1.0E-6                                 |  | 81.34                  |          |
| 10.0E-6                                |  | 101.60                 |          |
| <b>TOLNAFTATE</b>                      |  |                        |          |
| 10.0E-9                                |  | 121.34                 |          |
| 100.0E-9                               |  | 107.48                 |          |
| 1.0E-6                                 |  | 109.42                 |          |
| 10.0E-6                                |  | 114.92                 |          |



| Compounds and Final Concentrations (M)          | Average of % Viability | Hits (✓) |
|-------------------------------------------------|------------------------|----------|
| <b>TOLPERISONE HYDROCHLORIDE</b>                |                        |          |
| 10.0E-9                                         |                        | 96.91    |
| 100.0E-9                                        |                        | 91.07    |
| 1.0E-6                                          |                        | 87.73    |
| 10.0E-6                                         |                        | 83.17    |
| <b>TOLTRAZURIL</b>                              |                        |          |
| 10.0E-9                                         |                        | 91.00    |
| 100.0E-9                                        |                        | 113.64   |
| 1.0E-6                                          |                        | 107.88   |
| 10.0E-6                                         |                        | 120.98   |
| <b>TOMATINE</b>                                 |                        |          |
| 10.0E-9                                         |                        | 85.15    |
| 100.0E-9                                        |                        | 103.93   |
| 1.0E-6                                          |                        | 111.71   |
| 10.0E-6                                         |                        | 0.06     |
| <b>TOPIRAMATE</b>                               |                        |          |
| 10.0E-9                                         |                        | 112.86   |
| 100.0E-9                                        |                        | 136.07   |
| 1.0E-6                                          |                        | 138.35   |
| 10.0E-6                                         |                        | 104.52   |
| <b>TOPOTECAN HYDROCHLORIDE</b>                  |                        |          |
| 10.0E-9                                         |                        | 70.76    |
| 100.0E-9                                        |                        | 91.25    |
| 1.0E-6                                          |                        | 82.35    |
| 10.0E-6                                         |                        | 66.29    |
| <b>TOREMIPHENE CITRATE</b>                      |                        |          |
| 10.0E-9                                         |                        | 101.86   |
| 100.0E-9                                        |                        | 144.34   |
| 1.0E-6                                          |                        | 67.77    |
| 10.0E-6                                         |                        | 96.85    |
| <b>TOSYLCHLORAMIDE SODIUM</b>                   |                        |          |
| 10.0E-9                                         |                        | 111.07   |
| 100.0E-9                                        |                        | 110.80   |
| 1.0E-6                                          |                        | 71.67    |
| 10.0E-6                                         |                        | 89.97    |
| <b>TOTAROL</b>                                  |                        |          |
| 10.0E-9                                         |                        | 120.90   |
| 100.0E-9                                        |                        | 88.13    |
| 1.0E-6                                          |                        | 99.24    |
| 10.0E-6                                         |                        | 111.98   |
| <b>TOTAROL ACETATE</b>                          |                        |          |
| 10.0E-9                                         |                        | 113.14   |
| 100.0E-9                                        |                        | 132.71   |
| 1.0E-6                                          |                        | 106.23   |
| 10.0E-6                                         |                        | 61.38    |
| <b>TOTAROL-19-CARBOXYLIC ACID, METHYL ESTER</b> |                        |          |
| 10.0E-9                                         |                        | 100.91   |
| 100.0E-9                                        |                        | 79.26    |
| 1.0E-6                                          |                        | 88.80    |
| 10.0E-6                                         |                        | 70.20    |
| <b>TRAMADOL HYDROCHLORIDE</b>                   |                        |          |
| 10.0E-9                                         |                        | 124.67   |
| 100.0E-9                                        |                        | 98.52    |
| 1.0E-6                                          |                        | 110.35   |
| 10.0E-6                                         |                        | 126.18   |
| <b>TRANEXAMIC ACID</b>                          |                        |          |
| 10.0E-9                                         |                        | 130.18   |
| 100.0E-9                                        |                        | 151.88   |
| 1.0E-6                                          |                        | 79.15    |
| 10.0E-6                                         |                        | 85.85    |
| <b>TRANLYCYPROMINE SULFATE</b>                  |                        |          |
| 10.0E-9                                         |                        | 66.54    |
| 100.0E-9                                        |                        | 89.82    |
| 1.0E-6                                          |                        | 77.31    |
| 10.0E-6                                         |                        | 87.06    |
| <b>TRAZODONE HYDROCHLORIDE</b>                  |                        |          |
| 10.0E-9                                         |                        | 63.95    |
| 100.0E-9                                        |                        | 52.16    |
| 1.0E-6                                          |                        | 101.53   |
| 10.0E-6                                         |                        | 102.43   |
| <b>TRETINON</b>                                 |                        |          |
| 10.0E-9                                         |                        | 102.08   |
| 100.0E-9                                        |                        | 112.40   |
| 1.0E-6                                          |                        | 259.50   |
| 10.0E-6                                         |                        | 507.40   |
| <b>TRIA CETIN</b>                               |                        |          |
| 10.0E-9                                         |                        | 100.32   |
| 100.0E-9                                        |                        | 124.48   |
| 1.0E-6                                          |                        | 89.68    |
| 10.0E-6                                         |                        | 125.78   |
| <b>TRIA CETYLRESVERATROL</b>                    |                        |          |
| 10.0E-9                                         |                        | 79.91    |
| 100.0E-9                                        |                        | 136.09   |
| 1.0E-6                                          |                        | 96.21    |
| 10.0E-6                                         |                        | 51.15    |

| Compounds and Final Concentrations (M) | Average of % Viability | Hits (✓) |
|----------------------------------------|------------------------|----------|
| <b>TRIAMCINOLONE</b>                   |                        |          |
| 10.0E-9                                |                        | 92.08    |
| 100.0E-9                               |                        | 93.92    |
| 1.0E-6                                 |                        | 123.25   |
| 10.0E-6                                |                        | 80.54    |
| <b>TRIAMCINOLONE ACETONIDE</b>         |                        |          |
| 10.0E-9                                |                        | 110.33   |
| 100.0E-9                               |                        | 96.24    |
| 1.0E-6                                 |                        | 120.27   |
| 10.0E-6                                |                        | 101.45   |
| <b>TRIAMCINOLONE DIACETATE</b>         |                        |          |
| 10.0E-9                                |                        | 91.31    |
| 100.0E-9                               |                        | 130.05   |
| 1.0E-6                                 |                        | 109.63   |
| 10.0E-6                                |                        | 108.61   |
| <b>TRIAMTERENE</b>                     |                        |          |
| 10.0E-9                                |                        | 97.33    |
| 100.0E-9                               |                        | 107.38   |
| 1.0E-6                                 |                        | 102.49   |
| 10.0E-6                                |                        | 96.93    |
| <b>TRICHLORFON</b>                     |                        |          |
| 10.0E-9                                |                        | 121.22   |
| 100.0E-9                               |                        | 129.44   |
| 1.0E-6                                 |                        | 103.38   |
| 10.0E-6                                |                        | 97.77    |
| <b>TRICHLORMETHIAZIDE</b>              |                        |          |
| 10.0E-9                                |                        | 107.79   |
| 100.0E-9                               |                        | 109.04   |
| 1.0E-6                                 |                        | 111.12   |
| 10.0E-6                                |                        | 111.64   |
| <b>TRICHLORMETHINE</b>                 |                        |          |
| 10.0E-9                                |                        | 93.45    |
| 100.0E-9                               |                        | 88.47    |
| 1.0E-6                                 |                        | 118.23   |
| 10.0E-6                                |                        | 89.43    |
| <b>TRICLABENDAZOLE</b>                 |                        |          |
| 10.0E-9                                |                        | 88.07    |
| 100.0E-9                               |                        | 77.70    |
| 1.0E-6                                 |                        | 100.26   |
| 10.0E-6                                |                        | 73.44    |
| <b>TRICLOSAN</b>                       |                        |          |
| 10.0E-9                                |                        | 117.14   |
| 100.0E-9                               |                        | 91.45    |
| 1.0E-6                                 |                        | 97.12    |
| 10.0E-6                                |                        | 138.23   |
| <b>TRIDESACETOXYKHIVORIN</b>           |                        |          |
| 10.0E-9                                |                        | 108.32   |
| 100.0E-9                               |                        | 137.92   |
| 1.0E-6                                 |                        | 117.77   |
| 10.0E-6                                |                        | 98.59    |
| <b>TRIENTINE HYDROCHLORIDE</b>         |                        |          |
| 10.0E-9                                |                        | 137.56   |
| 100.0E-9                               |                        | 109.27   |
| 1.0E-6                                 |                        | 115.11   |
| 10.0E-6                                |                        | 103.14   |
| <b>TRIFLUOPERAZINE HYDROCHLORIDE</b>   |                        |          |
| 10.0E-9                                |                        | 77.28    |
| 100.0E-9                               |                        | 129.41   |
| 1.0E-6                                 |                        | 84.01    |
| 10.0E-6                                |                        | 19.50    |
| <b>TRIFLUPROMAZINE HYDROCHLORIDE</b>   |                        |          |
| 10.0E-9                                |                        | 90.76    |
| 100.0E-9                               |                        | 124.73   |
| 1.0E-6                                 |                        | 110.44   |
| 10.0E-6                                |                        | 120.23   |
| <b>TRIFLURIDINE</b>                    |                        |          |
| 10.0E-9                                |                        | 106.11   |
| 100.0E-9                               |                        | 96.65    |
| 1.0E-6                                 |                        | 95.63    |
| 10.0E-6                                |                        | 96.85    |
| <b>TRIGONELLINE</b>                    |                        |          |
| 10.0E-9                                |                        | 105.07   |
| 100.0E-9                               |                        | 111.84   |
| 1.0E-6                                 |                        | 80.79    |
| 10.0E-6                                |                        | 88.99    |
| <b>TRIHXYPHENIDYL HYDROCHLORIDE</b>    |                        |          |
| 10.0E-9                                |                        | 104.28   |
| 100.0E-9                               |                        | 98.58    |
| 1.0E-6                                 |                        | 93.00    |
| 10.0E-6                                |                        | 98.80    |
| <b>TRILOSTANE</b>                      |                        |          |
| 10.0E-9                                |                        | 75.99    |
| 100.0E-9                               |                        | 118.31   |
| 1.0E-6                                 |                        | 116.98   |
| 10.0E-6                                |                        | 85.26    |

| Compounds and Final Concentrations (M)       | Average of % Viability | Hits (✓) |
|----------------------------------------------|------------------------|----------|
| <b>TRIMEBUTINE MALEATE</b>                   |                        |          |
| 10.0E-9                                      |                        | 102.40   |
| 100.0E-9                                     |                        | 73.64    |
| 1.0E-6                                       |                        | 82.62    |
| 10.0E-6                                      |                        | 92.35    |
| <b>TRIMEDLURE</b>                            |                        |          |
| 10.0E-9                                      |                        | 87.64    |
| 100.0E-9                                     |                        | 70.02    |
| 1.0E-6                                       |                        | 102.06   |
| 10.0E-6                                      |                        | 30.11    |
| <b>TRIMEPAZINE TARTRATE</b>                  |                        |          |
| 10.0E-9                                      |                        | 103.92   |
| 100.0E-9                                     |                        | 103.05   |
| 1.0E-6                                       |                        | 107.69   |
| 10.0E-6                                      |                        | 105.84   |
| <b>TRIMETAZIDINE DIHYDROCHLORIDE</b>         |                        |          |
| 10.0E-9                                      |                        | 76.23    |
| 100.0E-9                                     |                        | 99.53    |
| 1.0E-6                                       |                        | 113.85   |
| 10.0E-6                                      |                        | 19.21    |
| <b>TRIMETHADIONE</b>                         |                        |          |
| 10.0E-9                                      |                        | 122.63   |
| 100.0E-9                                     |                        | 142.88   |
| 1.0E-6                                       |                        | 98.71    |
| 10.0E-6                                      |                        | 118.14   |
| <b>TRIMETHOBENZAMIDE HYDROCHLORIDE</b>       |                        |          |
| 10.0E-9                                      |                        | 119.16   |
| 100.0E-9                                     |                        | 106.84   |
| 1.0E-6                                       |                        | 98.35    |
| 10.0E-6                                      |                        | 150.93   |
| <b>TRIMETHOPRIM</b>                          |                        |          |
| 10.0E-9                                      |                        | 94.58    |
| 100.0E-9                                     |                        | 123.36   |
| 1.0E-6                                       |                        | 110.48   |
| 10.0E-6                                      |                        | 84.80    |
| <b>TRIMETHYLCOLCHICINIC ACID</b>             |                        |          |
| 10.0E-9                                      |                        | 94.96    |
| 100.0E-9                                     |                        | 107.96   |
| 1.0E-6                                       |                        | 102.30   |
| 10.0E-6                                      |                        | 97.89    |
| <b>TRIMETOZINE</b>                           |                        |          |
| 10.0E-9                                      |                        | 79.16    |
| 100.0E-9                                     |                        | 132.53   |
| 1.0E-6                                       |                        | 117.66   |
| 10.0E-6                                      |                        | 91.03    |
| <b>TRIMIPRAMINE MALEATE</b>                  |                        |          |
| 10.0E-9                                      |                        | 119.43   |
| 100.0E-9                                     |                        | 100.26   |
| 1.0E-6                                       |                        | 129.92   |
| 10.0E-6                                      |                        | 112.04   |
| <b>TRIOXSALEN</b>                            |                        |          |
| 10.0E-9                                      |                        | 71.04    |
| 100.0E-9                                     |                        | 103.20   |
| 1.0E-6                                       |                        | 88.32    |
| 10.0E-6                                      |                        | 153.97   |
| <b>TRIPLENNAMINE CITRATE</b>                 |                        |          |
| 10.0E-9                                      |                        | 104.87   |
| 100.0E-9                                     |                        | 60.24    |
| 1.0E-6                                       |                        | 85.82    |
| 10.0E-6                                      |                        | 121.19   |
| <b>TRIPROLIDINE HYDROCHLORIDE</b>            |                        |          |
| 10.0E-9                                      |                        | 88.00    |
| 100.0E-9                                     |                        | 91.93    |
| 1.0E-6                                       |                        | 94.73    |
| 10.0E-6                                      |                        | 138.10   |
| <b>TRIPTOPHENOLIDE</b>                       |                        |          |
| 10.0E-9                                      |                        | 113.69   |
| 100.0E-9                                     |                        | 93.22    |
| 1.0E-6                                       |                        | 110.96   |
| 10.0E-6                                      |                        | 88.10    |
| <b>TRISODIUM ETHYLENEDIAMINE TETRACETATE</b> |                        |          |
| 10.0E-9                                      |                        | 112.24   |
| 100.0E-9                                     |                        | 103.80   |
| 1.0E-6                                       |                        | 95.40    |
| 10.0E-6                                      |                        | 95.70    |
| <b>TROLOX</b>                                |                        |          |
| 10.0E-9                                      |                        | 109.10   |
| 100.0E-9                                     |                        | 146.54   |
| 1.0E-6                                       |                        | 94.38    |
| 10.0E-6                                      |                        | 105.27   |
| <b>TROPICAMIDE</b>                           |                        |          |
| 10.0E-9                                      |                        | 108.15   |
| 100.0E-9                                     |                        | 147.97   |
| 1.0E-6                                       |                        | 84.54    |
| 10.0E-6                                      |                        | 125.39   |

| Compounds and Final Concentrations (M) | Average of % Viability | Hits (✓) |
|----------------------------------------|------------------------|----------|
| <b>TROXERUTIN</b>                      |                        |          |
| 10.0E-9                                |                        | 100.92   |
| 100.0E-9                               |                        | 94.35    |
| 1.0E-6                                 |                        | 124.24   |
| 10.0E-6                                |                        | 101.59   |
| <b>TRYPTAMINE</b>                      |                        |          |
| 10.0E-9                                |                        | 106.81   |
| 100.0E-9                               |                        | 103.20   |
| 1.0E-6                                 |                        | 91.70    |
| 10.0E-6                                |                        | 96.02    |
| <b>TRYPTOPHAN</b>                      |                        |          |
| 10.0E-9                                |                        | 146.37   |
| 100.0E-9                               |                        | 140.94   |
| 1.0E-6                                 |                        | 79.47    |
| 10.0E-6                                |                        | 78.54    |
| <b>TUAMINOHEPTANE SULFATE</b>          |                        |          |
| 10.0E-9                                |                        | 79.29    |
| 100.0E-9                               |                        | 146.03   |
| 1.0E-6                                 |                        | 118.59   |
| 10.0E-6                                |                        | 131.52   |
| <b>TUBOCURARINE CHLORIDE</b>           |                        |          |
| 10.0E-9                                |                        | 109.31   |
| 100.0E-9                               |                        | 80.58    |
| 1.0E-6                                 |                        | 98.18    |
| 10.0E-6                                |                        | 79.32    |
| <b>TULOBUTEROL</b>                     |                        |          |
| 10.0E-9                                |                        | 107.07   |
| 100.0E-9                               |                        | 109.40   |
| 1.0E-6                                 |                        | 97.43    |
| 10.0E-6                                |                        | 78.47    |
| <b>TYLOSIN TARTRATE</b>                |                        |          |
| 10.0E-9                                |                        | 104.08   |
| 100.0E-9                               |                        | 116.30   |
| 1.0E-6                                 |                        | 128.15   |
| 10.0E-6                                |                        | 68.68    |
| <b>TYLOXAPOL</b>                       |                        |          |
| 10.0E-9                                |                        | 134.05   |
| 100.0E-9                               |                        | 164.41   |
| 1.0E-6                                 |                        | 96.14    |
| 10.0E-6                                |                        | 98.50    |
| <b>TYROSINE</b>                        |                        |          |
| 10.0E-9                                |                        | 130.36   |
| 100.0E-9                               |                        | 141.32   |
| 1.0E-6                                 |                        | 103.24   |
| 10.0E-6                                |                        | 106.06   |
| <b>TYROTHRICIN</b>                     |                        |          |
| 10.0E-9                                |                        | 107.48   |
| 100.0E-9                               |                        | 85.18    |
| 1.0E-6                                 |                        | 75.59    |
| 10.0E-6                                |                        | 9.88     |
| <b>UBIDECARENEONE</b>                  |                        |          |
| 10.0E-9                                |                        | 112.44   |
| 100.0E-9                               |                        | 100.51   |
| 1.0E-6                                 |                        | 117.68   |
| 10.0E-6                                |                        | 96.01    |
| <b>UMBELLIFERONE</b>                   |                        |          |
| 10.0E-9                                |                        | 92.54    |
| 100.0E-9                               |                        | 83.52    |
| 1.0E-6                                 |                        | 103.97   |
| 10.0E-6                                |                        | 79.28    |
| <b>UNDECYLENIC ACID</b>                |                        |          |
| 10.0E-9                                |                        | 122.93   |
| 100.0E-9                               |                        | 93.13    |
| 1.0E-6                                 |                        | 95.01    |
| 10.0E-6                                |                        | 18.08    |
| <b>URAPIDIL HYDROCHLORIDE</b>          |                        |          |
| 10.0E-9                                |                        | 74.18    |
| 100.0E-9                               |                        | 133.55   |
| 1.0E-6                                 |                        | 119.28   |
| 10.0E-6                                |                        | 107.28   |
| <b>UREA</b>                            |                        |          |
| 10.0E-9                                |                        | 110.62   |
| 100.0E-9                               |                        | 121.89   |
| 1.0E-6                                 |                        | 101.61   |
| 10.0E-6                                |                        | 135.20   |
| <b>URIDINE TRIPHOSPHATE TRISODIUM</b>  |                        |          |
| 10.0E-9                                |                        | 99.05    |
| 100.0E-9                               |                        | 86.83    |
| 1.0E-6                                 |                        | 120.91   |
| 10.0E-6                                |                        | 132.10   |
| <b>URSINOIC ACID</b>                   |                        |          |
| 10.0E-9                                |                        | 101.06   |
| 100.0E-9                               |                        | 93.18    |
| 1.0E-6                                 |                        | 109.82   |
| 10.0E-6                                |                        | 110.95   |

| Compounds and Final Concentrations (M) | Average of % Viability | Hits (✓) |
|----------------------------------------|------------------------|----------|
| <b>URSOCHOLANIC ACID</b>               |                        |          |
| 10.0E-9                                |                        | 90.17    |
| 100.0E-9                               |                        | 79.84    |
| 1.0E-6                                 |                        | 94.55    |
| 10.0E-6                                |                        | 113.71   |
| <b>URSODIOL</b>                        |                        |          |
| 10.0E-9                                |                        | 145.78   |
| 100.0E-9                               |                        | 101.97   |
| 1.0E-6                                 |                        | 111.36   |
| 10.0E-6                                |                        | 121.13   |
| <b>URSOLIC ACID</b>                    |                        |          |
| 10.0E-9                                |                        | 95.44    |
| 100.0E-9                               |                        | 113.53   |
| 1.0E-6                                 |                        | 123.61   |
| 10.0E-6                                |                        | 108.46   |
| <b>UTILIN</b>                          |                        |          |
| 10.0E-9                                |                        | 124.63   |
| 100.0E-9                               |                        | 134.40   |
| 1.0E-6                                 |                        | 97.54    |
| 10.0E-6                                |                        | 99.64    |
| <b>VALACYCLOVIR HYDROCHLORIDE</b>      |                        |          |
| 10.0E-9                                |                        | 125.04   |
| 100.0E-9                               |                        | 129.32   |
| 1.0E-6                                 |                        | 98.62    |
| 10.0E-6                                |                        | 98.36    |
| <b>VALERYL SALICYLATE</b>              |                        |          |
| 10.0E-9                                |                        | 135.89   |
| 100.0E-9                               |                        | 119.38   |
| 1.0E-6                                 |                        | 109.87   |
| 10.0E-6                                |                        | 147.63   |
| <b>VALINOMYCIN</b>                     |                        |          |
| 10.0E-9                                |                        | 22.06    |
| 100.0E-9                               |                        | 44.31    |
| 1.0E-6                                 |                        | 25.61    |
| 10.0E-6                                |                        | 34.52    |
| <b>VALPROATE SODIUM</b>                |                        |          |
| 10.0E-9                                |                        | 123.97   |
| 100.0E-9                               |                        | 113.90   |
| 1.0E-6                                 |                        | 94.28    |
| 10.0E-6                                |                        | 103.71   |
| <b>VALSARTAN</b>                       |                        |          |
| 10.0E-9                                |                        | 134.49   |
| 100.0E-9                               |                        | 120.68   |
| 1.0E-6                                 |                        | 87.95    |
| 10.0E-6                                |                        | 120.08   |
| <b>VANCOMYCIN HYDROCHLORIDE</b>        |                        |          |
| 10.0E-9                                |                        | 126.30   |
| 100.0E-9                               |                        | 120.44   |
| 1.0E-6                                 |                        | 94.83    |
| 10.0E-6                                |                        | 102.03   |
| <b>VARDENAFIL HYDROCHLORIDE</b>        |                        |          |
| 10.0E-9                                |                        | 99.37    |
| 100.0E-9                               |                        | 126.55   |
| 1.0E-6                                 |                        | 98.88    |
| 10.0E-6                                |                        | 97.23    |
| <b>VECURONIUM BROMIDE</b>              |                        |          |
| 10.0E-9                                |                        | 96.51    |
| 100.0E-9                               |                        | 114.27   |
| 1.0E-6                                 |                        | 86.10    |
| 10.0E-6                                |                        | 135.79   |
| <b>VENLAFAXINE</b>                     |                        |          |
| 10.0E-9                                |                        | 82.75    |
| 100.0E-9                               |                        | 88.02    |
| 1.0E-6                                 |                        | 101.27   |
| 10.0E-6                                |                        | 114.02   |
| <b>VERAPAMIL HYDROCHLORIDE</b>         |                        |          |
| 10.0E-9                                |                        | 91.30    |
| 100.0E-9                               |                        | 94.78    |
| 1.0E-6                                 |                        | 114.48   |
| 10.0E-6                                |                        | 73.51    |
| <b>VERATRINE SULFATE</b>               |                        |          |
| 10.0E-9                                |                        | 120.96   |
| 100.0E-9                               |                        | 112.96   |
| 1.0E-6                                 |                        | 153.93   |
| 10.0E-6                                |                        | 120.65   |
| <b>VESAMICOL HYDROCHLORIDE</b>         |                        |          |
| 10.0E-9                                |                        | 62.28    |
| 100.0E-9                               |                        | 143.84   |
| 1.0E-6                                 |                        | 98.29    |
| 10.0E-6                                |                        | 114.69   |
| <b>VIDARABINE</b>                      |                        |          |
| 10.0E-9                                |                        | 92.29    |
| 100.0E-9                               |                        | 94.09    |
| 1.0E-6                                 |                        | 64.63    |
| 10.0E-6                                |                        | 64.15    |

| Compounds and Final Concentrations (M) | Average of % Viability | Hits (✓) |
|----------------------------------------|------------------------|----------|
| <b>VIGABATRIN</b>                      |                        |          |
| 10.0E-9                                |                        | 98.49    |
| 100.0E-9                               |                        | 121.01   |
| 1.0E-6                                 |                        | 100.62   |
| 10.0E-6                                |                        | 119.98   |
| <b>VINBLASTINE SULFATE</b>             |                        |          |
| 10.0E-9                                |                        | 70.21    |
| 100.0E-9                               |                        | 98.40    |
| 1.0E-6                                 |                        | 48.48    |
| 10.0E-6                                |                        | 50.79    |
| <b>VINCAMINE</b>                       |                        |          |
| 10.0E-9                                |                        | 84.27    |
| 100.0E-9                               |                        | 137.92   |
| 1.0E-6                                 |                        | 114.99   |
| 10.0E-6                                |                        | 82.51    |
| <b>VINCRIStINE SULFATE</b>             |                        |          |
| 10.0E-9                                |                        | 93.96    |
| 100.0E-9                               |                        | 67.10    |
| 1.0E-6                                 |                        | 51.01    |
| 10.0E-6                                |                        | 45.65    |
| <b>VIOLASTYRENE</b>                    |                        |          |
| 10.0E-9                                |                        | 110.16   |
| 100.0E-9                               |                        | 109.94   |
| 1.0E-6                                 |                        | 136.42   |
| 10.0E-6                                |                        | 116.62   |
| <b>VISNAGIN</b>                        |                        |          |
| 10.0E-9                                |                        | 100.60   |
| 100.0E-9                               |                        | 107.78   |
| 1.0E-6                                 |                        | 86.78    |
| 10.0E-6                                |                        | 67.85    |
| <b>VULPINIC ACID</b>                   |                        |          |
| 10.0E-9                                |                        | 92.00    |
| 100.0E-9                               |                        | 106.53   |
| 1.0E-6                                 |                        | 108.93   |
| 10.0E-6                                |                        | 107.32   |
| <b>WARFARIN</b>                        |                        |          |
| 10.0E-9                                |                        | 84.82    |
| 100.0E-9                               |                        | 128.00   |
| 1.0E-6                                 |                        | 93.21    |
| 10.0E-6                                |                        | 106.22   |
| <b>XANTHONE</b>                        |                        |          |
| 10.0E-9                                |                        | 109.31   |
| 100.0E-9                               |                        | 119.59   |
| 1.0E-6                                 |                        | 132.68   |
| 10.0E-6                                |                        | 86.66    |
| <b>XANTHOPTERIN</b>                    |                        |          |
| 10.0E-9                                |                        | 84.19    |
| 100.0E-9                               |                        | 90.21    |
| 1.0E-6                                 |                        | 94.74    |
| 10.0E-6                                |                        | 117.80   |
| <b>XANTHOXYLIN</b>                     |                        |          |
| 10.0E-9                                |                        | 80.28    |
| 100.0E-9                               |                        | 93.27    |
| 1.0E-6                                 |                        | 113.51   |
| 10.0E-6                                |                        | 103.04   |
| <b>XANTHURENIC ACID</b>                |                        |          |
| 10.0E-9                                |                        | 69.77    |
| 100.0E-9                               |                        | 98.82    |
| 1.0E-6                                 |                        | 108.75   |
| 10.0E-6                                |                        | 95.91    |
| <b>XANTHYLETIN</b>                     |                        |          |
| 10.0E-9                                |                        | 99.61    |
| 100.0E-9                               |                        | 93.83    |
| 1.0E-6                                 |                        | 89.49    |
| 10.0E-6                                |                        | 63.12    |
| <b>XYLAZINE</b>                        |                        |          |
| 10.0E-9                                |                        | 99.82    |
| 100.0E-9                               |                        | 79.76    |
| 1.0E-6                                 |                        | 92.35    |
| 10.0E-6                                |                        | 152.05   |
| <b>XYLOCARPUS A</b>                    |                        |          |
| 10.0E-9                                |                        | 131.34   |
| 100.0E-9                               |                        | 129.09   |
| 1.0E-6                                 |                        | 95.85    |
| 10.0E-6                                |                        | 72.70    |
| <b>XYLOMETAZOLINE HYDROCHLORIDE</b>    |                        |          |
| 10.0E-9                                |                        | 80.77    |
| 100.0E-9                               |                        | 127.34   |
| 1.0E-6                                 |                        | 123.44   |
| 10.0E-6                                |                        | 157.85   |
| <b>XYLOSE</b>                          |                        |          |
| 10.0E-9                                |                        | 76.92    |
| 100.0E-9                               |                        | 106.31   |
| 1.0E-6                                 |                        | 100.18   |
| 10.0E-6                                |                        | 131.86   |

| Compounds and Final Concentrations (M) | Average of % Viability | Hits (✓)      |
|----------------------------------------|------------------------|---------------|
| <b>YOHIMBIC ACID HYDRATE</b>           |                        |               |
| 10.0E-9                                |                        | 96.31         |
| 100.0E-9                               |                        | 108.50        |
| 1.0E-6                                 |                        | 127.91        |
| 10.0E-6                                |                        | 72.23         |
| <b>YOHIMBINE HYDROCHLORIDE</b>         |                        |               |
| 10.0E-9                                |                        | 102.79        |
| 100.0E-9                               |                        | 134.85        |
| 1.0E-6                                 |                        | 116.25        |
| 10.0E-6                                |                        | 76.02         |
| <b>ZAPRINAST</b>                       |                        |               |
| 10.0E-9                                |                        | 77.91         |
| 100.0E-9                               |                        | 119.13        |
| 1.0E-6                                 |                        | 103.67        |
| 10.0E-6                                |                        | 82.17         |
| <b>ZIDOVUDINE [AZT]</b>                |                        |               |
| 10.0E-9                                |                        | 67.76         |
| 100.0E-9                               |                        | 109.91        |
| 1.0E-6                                 |                        | 112.02        |
| 10.0E-6                                |                        | 98.91         |
| <b>ZILEUTON</b>                        |                        |               |
| 10.0E-9                                |                        | 145.23        |
| 100.0E-9                               |                        | 87.60         |
| 1.0E-6                                 |                        | 97.25         |
| 10.0E-6                                |                        | 76.04         |
| <b>ZINC UNDECYLENATE</b>               |                        |               |
| 10.0E-9                                |                        | 124.39        |
| 100.0E-9                               |                        | 99.82         |
| 1.0E-6                                 |                        | 107.53        |
| 10.0E-6                                |                        | 119.52        |
| <b>ZOLMITRIPTAN</b>                    |                        |               |
| 10.0E-9                                |                        | 39.39         |
| 100.0E-9                               |                        | 135.65        |
| 1.0E-6                                 |                        | 113.02        |
| 10.0E-6                                |                        | 115.89        |
| <b>ZOMEPIRAC SODIUM</b>                |                        |               |
| 10.0E-9                                |                        | 93.85         |
| 100.0E-9                               |                        | 94.94         |
| 1.0E-6                                 |                        | 85.81         |
| 10.0E-6                                |                        | 106.60        |
| <b>ZOPICLONE</b>                       |                        |               |
| 10.0E-9                                |                        | 116.33        |
| 100.0E-9                               |                        | 83.55         |
| 1.0E-6                                 |                        | 89.61         |
| 10.0E-6                                |                        | 120.79        |
| <b>ZOXAZOLAMINE</b>                    |                        |               |
| 10.0E-9                                |                        | 102.84        |
| 100.0E-9                               |                        | 98.66         |
| 1.0E-6                                 |                        | 119.25        |
| 10.0E-6                                |                        | 76.12         |
| <b>Grand Total</b>                     |                        | <b>103.47</b> |
