# Supplementary material for: Dissecting the Contributions of Cooperating Gene Mutations to Cancer Phenotypes and Drug Responses with Patient-Derived iPSCs
Source: PubMed Central journal article supplement — Stem Cell Reports. 2018 Apr 19;10(5):1610–24. doi: 10.1016/j.stemcr.2018.03.020 (PMC5995368; doi:10.1016/j.stemcr.2018.03.020), 2018-04-19
Supplement: mmc3.pdf [file mmc3.pdf]

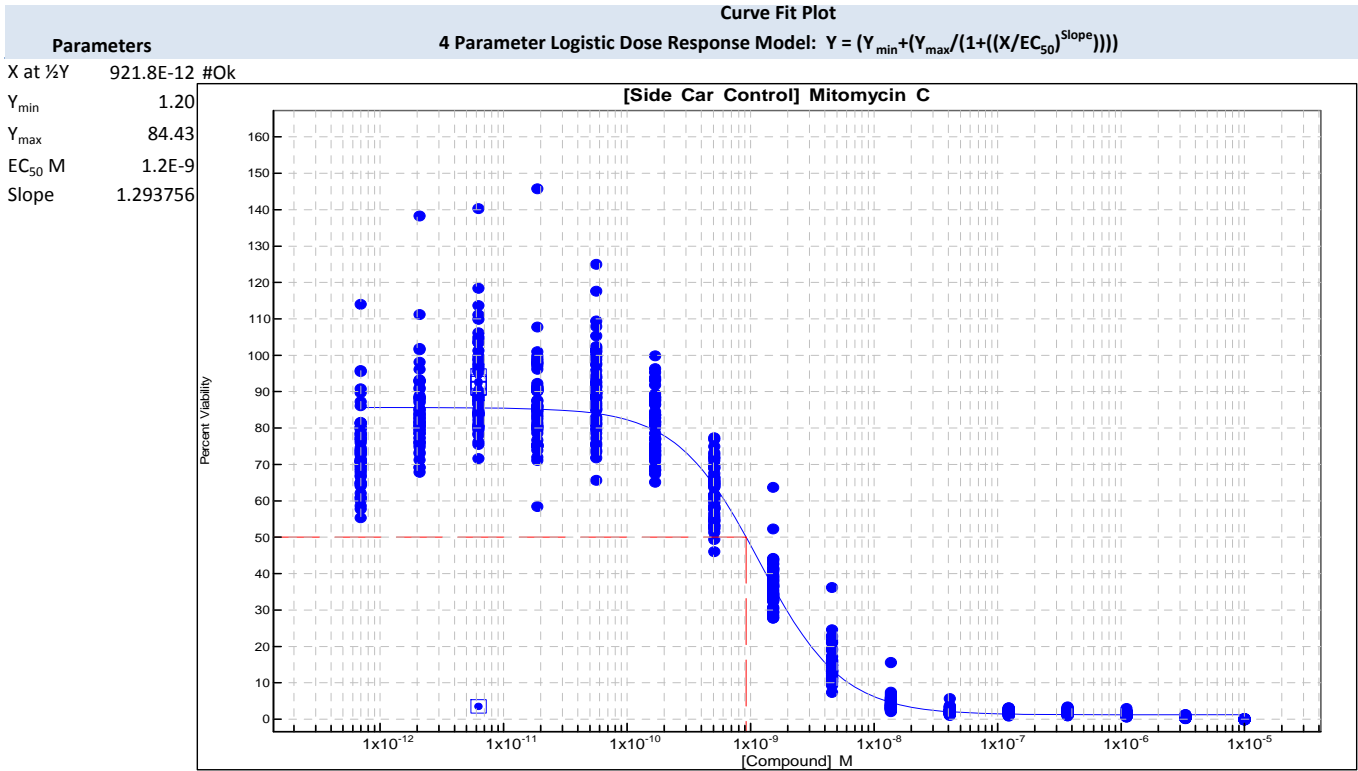

| Compounds and Final Concentrations (M)                     | Average of % Viability | Hits (✓) |
|------------------------------------------------------------|------------------------|----------|
| <b>1-(2-METHOXYPHENYL)PIRAZINE HYDROCHLORIDE</b>           |                        |          |
| 10.0E-9                                                    |                        | 127.92   |
| 100.0E-9                                                   |                        | 126.34   |
| 1.0E-6                                                     |                        | 116.91   |
| 10.0E-6                                                    |                        | 108.24   |
| <b>1,2alpha-EPOXYDEACETOXYDIHYDROGEDUNIN</b>               |                        |          |
| 10.0E-9                                                    |                        | 111.30   |
| 100.0E-9                                                   |                        | 108.72   |
| 1.0E-6                                                     |                        | 107.98   |
| 10.0E-6                                                    |                        | 56.47    |
| <b>1,3,5-TRIMETHOXYBENZENE</b>                             |                        |          |
| 10.0E-9                                                    |                        | 129.24   |
| 100.0E-9                                                   |                        | 128.30   |
| 1.0E-6                                                     |                        | 98.74    |
| 10.0E-6                                                    |                        | 125.45   |
| <b>1,3-DIDEACETYL-7-DEACETOXY-7-OXOKHIVORIN</b>            |                        |          |
| 10.0E-9                                                    |                        | 134.43   |
| 100.0E-9                                                   |                        | 134.25   |
| 1.0E-6                                                     |                        | 118.59   |
| 10.0E-6                                                    |                        | 108.26   |
| <b>1,7-DIDEACETOXY-1,7-DIOXO-3-DEACETYLKHIVORIN</b>        |                        |          |
| 10.0E-9                                                    |                        | 124.36   |
| 100.0E-9                                                   |                        | 119.54   |
| 1.0E-6                                                     |                        | 112.93   |
| 10.0E-6                                                    |                        | 108.55   |
| <b>1,7-DIDEACETOXY-1,7-DIOXOKHIVORIN</b>                   |                        |          |
| 10.0E-9                                                    |                        | 123.91   |
| 100.0E-9                                                   |                        | 126.33   |
| 1.0E-6                                                     |                        | 120.17   |
| 10.0E-6                                                    |                        | 105.94   |
| <b>10-HYDROXYCAMPTOTHECIN</b>                              |                        |          |
| 10.0E-9                                                    |                        | 52.41    |
| 100.0E-9                                                   |                        | 3.86     |
| 1.0E-6                                                     |                        | 2.81     |
| 10.0E-6                                                    |                        | 1.99     |
| <b>11a-ACETOXYPROGESTERONE</b>                             |                        |          |
| 10.0E-9                                                    |                        | 111.97   |
| 100.0E-9                                                   |                        | 111.05   |
| 1.0E-6                                                     |                        | 102.56   |
| 10.0E-6                                                    |                        | 64.57    |
| <b>11alpha-HYDROXYPROGESTERONE HEMISUCCINATE</b>           |                        |          |
| 10.0E-9                                                    |                        | 123.52   |
| 100.0E-9                                                   |                        | 123.91   |
| 1.0E-6                                                     |                        | 132.66   |
| 10.0E-6                                                    |                        | 115.53   |
| <b>12a-HYDROXY-5-DEOXYDEHYDROMUNDUSERONE</b>               |                        |          |
| 10.0E-9                                                    |                        | 135.80   |
| 100.0E-9                                                   |                        | 122.35   |
| 1.0E-6                                                     |                        | 116.66   |
| 10.0E-6                                                    |                        | 98.09    |
| <b>12a-HYDROXY-9-DEMETHYLMUNDUSERONE-8-CARBOXYLIC ACID</b> |                        |          |
| 10.0E-9                                                    |                        | 75.30    |
| 100.0E-9                                                   |                        | 115.99   |
| 1.0E-6                                                     |                        | 104.02   |
| 10.0E-6                                                    |                        | 91.05    |
| <b>13-METHYL-4,4-BISNOR-8,11,13-PODOCARPATRIEN-3-ONE</b>   |                        |          |
| 10.0E-9                                                    |                        | 103.14   |
| 100.0E-9                                                   |                        | 115.64   |
| 1.0E-6                                                     |                        | 112.40   |
| 10.0E-6                                                    |                        | 102.61   |
| <b>18alpha-GLYCRRHETINIC ACID</b>                          |                        |          |
| 10.0E-9                                                    |                        | 132.81   |
| 100.0E-9                                                   |                        | 118.32   |
| 1.0E-6                                                     |                        | 115.49   |
| 10.0E-6                                                    |                        | 125.00   |
| <b>18-AMINOABIETA-8,11,13-TRIENE SULFATE</b>               |                        |          |
| 10.0E-9                                                    |                        | 103.14   |
| 100.0E-9                                                   |                        | 124.35   |
| 1.0E-6                                                     |                        | 113.02   |
| 10.0E-6                                                    |                        | 80.40    |
| <b>1-HYDROXY-3,6,7-TRIMETHOXY-2,8-DIPRENYLXANTHONE</b>     |                        |          |
| 10.0E-9                                                    |                        | 110.16   |
| 100.0E-9                                                   |                        | 132.37   |
| 1.0E-6                                                     |                        | 115.96   |
| 10.0E-6                                                    |                        | 123.01   |
| <b>1-MONOPALMITIN</b>                                      |                        |          |
| 10.0E-9                                                    |                        | 146.44   |
| 100.0E-9                                                   |                        | 133.76   |
| 1.0E-6                                                     |                        | 123.55   |
| 10.0E-6                                                    |                        | 133.18   |

| Compounds and Final Concentrations (M)               | Average of % Viability | Hits (✓) |
|------------------------------------------------------|------------------------|----------|
| <b>1-PHENYLBIGUANIDE HYDROCHLORIDE</b>               |                        |          |
| 10.0E-9                                              |                        | 108.55   |
| 100.0E-9                                             |                        | 115.75   |
| 1.0E-6                                               |                        | 107.76   |
| 10.0E-6                                              |                        | 100.58   |
| <b>1R,2S-PHENYLPROPYLAMINE</b>                       |                        |          |
| 10.0E-9                                              |                        | 121.95   |
| 100.0E-9                                             |                        | 126.45   |
| 1.0E-6                                               |                        | 123.47   |
| 10.0E-6                                              |                        | 129.30   |
| <b>2,2'-AZO-bis-2-AMINOPROPANE</b>                   |                        |          |
| 10.0E-9                                              |                        | 124.20   |
| 100.0E-9                                             |                        | 116.56   |
| 1.0E-6                                               |                        | 122.12   |
| 10.0E-6                                              |                        | 113.03   |
| <b>2',2'-BISEPIGALLOCATECHIN DIGALLATE</b>           |                        |          |
| 10.0E-9                                              |                        | 104.06   |
| 100.0E-9                                             |                        | 118.80   |
| 1.0E-6                                               |                        | 122.92   |
| 10.0E-6                                              |                        | 98.97    |
| <b>2,3,4-TRIHYDROXY-4'-ETHOXYBENZOPHENONE</b>        |                        |          |
| 10.0E-9                                              |                        | 118.09   |
| 100.0E-9                                             |                        | 120.98   |
| 1.0E-6                                               |                        | 95.81    |
| 10.0E-6                                              |                        | 71.24    |
| <b>2,3,4'-TRIHYDROXY-4-METHOXYBENZOPHENONE</b>       |                        |          |
| 10.0E-9                                              |                        | 140.34   |
| 100.0E-9                                             |                        | 123.49   |
| 1.0E-6                                               |                        | 105.22   |
| 10.0E-6                                              |                        | 34.01    |
| <b>2,3-DICHLORO-5,8-DIHYDROXYNAPHTHOQUINONE</b>      |                        |          |
| 10.0E-9                                              |                        | 108.49   |
| 100.0E-9                                             |                        | 93.62    |
| 1.0E-6                                               |                        | 23.85    |
| 10.0E-6                                              |                        | 0.09     |
| <b>2',3-DIHYDROXY-4,4',6'-TRIMETHOXYCHALCONE</b>     |                        |          |
| 10.0E-9                                              |                        | 118.44   |
| 100.0E-9                                             |                        | 127.57   |
| 1.0E-6                                               |                        | 110.87   |
| 10.0E-6                                              |                        | 80.53    |
| <b>2,3-DIHYDROXY-4-METHOXY-4'-ETHOXYBENZOPHENONE</b> |                        |          |
| 10.0E-9                                              |                        | 124.52   |
| 100.0E-9                                             |                        | 111.50   |
| 1.0E-6                                               |                        | 100.16   |
| 10.0E-6                                              |                        | 79.92    |
| <b>2,3-DIHYDROXY-6,7-DICHLOROQUINOXALINE</b>         |                        |          |
| 10.0E-9                                              |                        | 109.80   |
| 100.0E-9                                             |                        | 121.73   |
| 1.0E-6                                               |                        | 121.39   |
| 10.0E-6                                              |                        | 119.12   |
| <b>2,3-DIMERCAPTOSUCCINIC ACID</b>                   |                        |          |
| 10.0E-9                                              |                        | 109.55   |
| 100.0E-9                                             |                        | 113.92   |
| 1.0E-6                                               |                        | 126.16   |
| 10.0E-6                                              |                        | 64.06    |
| <b>2',4-DIHYDROXY-3,4',6'-TRIMETHOXYCHALCONE</b>     |                        |          |
| 10.0E-9                                              |                        | 125.78   |
| 100.0E-9                                             |                        | 120.64   |
| 1.0E-6                                               |                        | 106.19   |
| 10.0E-6                                              |                        | 98.64    |
| <b>2',4'-DIHYDROXY-4-METHOXYCHALCONE</b>             |                        |          |
| 10.0E-9                                              |                        | 133.86   |
| 100.0E-9                                             |                        | 145.99   |
| 1.0E-6                                               |                        | 127.51   |
| 10.0E-6                                              |                        | 109.90   |
| <b>2',4'-DIHYDROXYCHALCONE</b>                       |                        |          |
| 10.0E-9                                              |                        | 122.02   |
| 100.0E-9                                             |                        | 136.59   |
| 1.0E-6                                               |                        | 109.20   |
| 10.0E-6                                              |                        | 86.89    |
| <b>2',4-DIHYDROXYCHALCONE</b>                        |                        |          |
| 10.0E-9                                              |                        | 126.84   |
| 100.0E-9                                             |                        | 121.80   |
| 1.0E-6                                               |                        | 107.18   |
| 10.0E-6                                              |                        | 78.84    |
| <b>2',4'-DIHYDROXYCHALCONE 4'-GLUCOSIDE</b>          |                        |          |
| 10.0E-9                                              |                        | 120.68   |
| 100.0E-9                                             |                        | 130.15   |
| 1.0E-6                                               |                        | 112.27   |
| 10.0E-6                                              |                        | 107.85   |

| Compounds and Final Concentrations (M)              | Average of % Viability | Hits (✓) |
|-----------------------------------------------------|------------------------|----------|
| <b>2,4-DINITROPHENOL</b>                            |                        |          |
| 10.0E-9                                             |                        | 123.06   |
| 100.0E-9                                            |                        | 122.73   |
| 1.0E-6                                              |                        | 118.68   |
| 10.0E-6                                             |                        | 104.40   |
| <b>2',5'-DIHYDROXY-4-METHOXYCHALCONE</b>            |                        |          |
| 10.0E-9                                             |                        | 120.85   |
| 100.0E-9                                            |                        | 123.09   |
| 1.0E-6                                              |                        | 108.17   |
| 10.0E-6                                             |                        | 58.17    |
| <b>2,5-DI-t-BUTYL-4-HYDROXYANISOLE</b>              |                        |          |
| 10.0E-9                                             |                        | 118.10   |
| 100.0E-9                                            |                        | 117.89   |
| 1.0E-6                                              |                        | 136.37   |
| 10.0E-6                                             |                        | 109.56   |
| <b>2,6-DIHYDROXY-4-METHOXYTOLUENE</b>               |                        |          |
| 10.0E-9                                             |                        | 140.62   |
| 100.0E-9                                            |                        | 128.06   |
| 1.0E-6                                              |                        | 113.66   |
| 10.0E-6                                             |                        | 102.52   |
| <b>2,6-DIMETHOXYQUINONE</b>                         |                        |          |
| 10.0E-9                                             |                        | 79.25    |
| 100.0E-9                                            |                        | 81.13    |
| 1.0E-6                                              |                        | 78.67    |
| 10.0E-6                                             |                        | 1.59     |
| <b>21-ACETOXYPREGNENOLONE</b>                       |                        |          |
| 10.0E-9                                             |                        | 104.47   |
| 100.0E-9                                            |                        | 94.13    |
| 1.0E-6                                              |                        | 113.58   |
| 10.0E-6                                             |                        | 104.04   |
| <b>2-AMINOBENZENESULFONAMIDE</b>                    |                        |          |
| 10.0E-9                                             |                        | 119.16   |
| 100.0E-9                                            |                        | 112.75   |
| 1.0E-6                                              |                        | 105.08   |
| 10.0E-6                                             |                        | 105.88   |
| <b>2-BENZOYL-5-METHOXYBENZOQUINONE</b>              |                        |          |
| 10.0E-9                                             |                        | 121.16   |
| 100.0E-9                                            |                        | 118.15   |
| 1.0E-6                                              |                        | 122.96   |
| 10.0E-6                                             |                        | 121.40   |
| <b>2-HYDROXY-3,4-DIMETHOXYBENZOIC ACID</b>          |                        |          |
| 10.0E-9                                             |                        | 138.42   |
| 100.0E-9                                            |                        | 137.77   |
| 1.0E-6                                              |                        | 114.55   |
| 10.0E-6                                             |                        | 1.82     |
| <b>2-HYDROXY-5 (6)EPOXY-TETRAHYDROCARYOPHYLLENE</b> |                        |          |
| 10.0E-9                                             |                        | 127.50   |
| 100.0E-9                                            |                        | 113.99   |
| 1.0E-6                                              |                        | 116.27   |
| 10.0E-6                                             |                        | 78.75    |
| <b>2-MERCAPTOBENZOTHIAZOLE</b>                      |                        |          |
| 10.0E-9                                             |                        | 89.26    |
| 100.0E-9                                            |                        | 95.33    |
| 1.0E-6                                              |                        | 111.87   |
| 10.0E-6                                             |                        | 92.97    |
| <b>2-METHOXY-5 (6)EPOXY-TETRAHYDROCARYOPHYLLENE</b> |                        |          |
| 10.0E-9                                             |                        | 119.01   |
| 100.0E-9                                            |                        | 139.68   |
| 1.0E-6                                              |                        | 119.10   |
| 10.0E-6                                             |                        | 40.52    |
| <b>2'-METHOXYFORMONETIN</b>                         |                        |          |
| 10.0E-9                                             |                        | 123.88   |
| 100.0E-9                                            |                        | 136.03   |
| 1.0E-6                                              |                        | 135.85   |
| 10.0E-6                                             |                        | 128.37   |
| <b>2-METHOXYRESORCINOL</b>                          |                        |          |
| 10.0E-9                                             |                        | 113.61   |
| 100.0E-9                                            |                        | 127.42   |
| 1.0E-6                                              |                        | 113.15   |
| 10.0E-6                                             |                        | 115.77   |
| <b>2-METHOXYXANTHONE</b>                            |                        |          |
| 10.0E-9                                             |                        | 119.91   |
| 100.0E-9                                            |                        | 123.52   |
| 1.0E-6                                              |                        | 121.74   |
| 10.0E-6                                             |                        | 114.45   |
| <b>2-METHYL GRAMINE</b>                             |                        |          |
| 10.0E-9                                             |                        | 109.24   |
| 100.0E-9                                            |                        | 114.89   |
| 1.0E-6                                              |                        | 93.73    |
| 10.0E-6                                             |                        | 94.94    |

| Compounds and Final Concentrations (M)                                                             | Average of % Viability | Hits (✓) |
|----------------------------------------------------------------------------------------------------|------------------------|----------|
| <b>2-METHYL-4-(PIPERIDIN-1-YLCARBOXY)-5-ISOPROPYLPHENYLTRIMETHYLAMMONIUM CHLORIDE</b>              |                        |          |
| 10.0E-9                                                                                            |                        | 113.08   |
| 100.0E-9                                                                                           |                        | 115.57   |
| 1.0E-6                                                                                             |                        | 132.70   |
| 10.0E-6                                                                                            |                        | 124.60   |
| <b>2-METHYL-5,7,8-TRIMETHOXYISOFLAVONE</b>                                                         |                        |          |
| 10.0E-9                                                                                            |                        | 113.18   |
| 100.0E-9                                                                                           |                        | 109.67   |
| 1.0E-6                                                                                             |                        | 104.84   |
| 10.0E-6                                                                                            |                        | 3.29     |
| <b>2-METHYLENE-5-(2,5-DIOXOTETRAHYDROFURAN-3-YL)-6-OXO--10,10-DIMETHYLBICYCLO[7: 2: 0]UNDECANE</b> |                        |          |
| 10.0E-9                                                                                            |                        | 122.40   |
| 100.0E-9                                                                                           |                        | 121.10   |
| 1.0E-6                                                                                             |                        | 107.90   |
| 10.0E-6                                                                                            |                        | 113.10   |
| <b>2-THIOURACIL</b>                                                                                |                        |          |
| 10.0E-9                                                                                            |                        | 108.93   |
| 100.0E-9                                                                                           |                        | 104.40   |
| 1.0E-6                                                                                             |                        | 98.33    |
| 10.0E-6                                                                                            |                        | 91.87    |
| <b>3,16-DIDEOXYMEXICANOLIDE-3beta-DIOL</b>                                                         |                        |          |
| 10.0E-9                                                                                            |                        | 121.85   |
| 100.0E-9                                                                                           |                        | 142.81   |
| 1.0E-6                                                                                             |                        | 119.46   |
| 10.0E-6                                                                                            |                        | 92.32    |
| <b>3,3'-DIINDOLYLMETHANE</b>                                                                       |                        |          |
| 10.0E-9                                                                                            |                        | 114.02   |
| 100.0E-9                                                                                           |                        | 111.40   |
| 1.0E-6                                                                                             |                        | 115.52   |
| 10.0E-6                                                                                            |                        | 88.44    |
| <b>3,4',5,6,7-PENTAMETHOXYFLAVONE</b>                                                              |                        |          |
| 10.0E-9                                                                                            |                        | 112.16   |
| 100.0E-9                                                                                           |                        | 110.54   |
| 1.0E-6                                                                                             |                        | 111.75   |
| 10.0E-6                                                                                            |                        | 2.43     |
| <b>3,4-DIDESMETHYL-5-DESHYDROXY-3'-ETHOXYSCLEROIN</b>                                              |                        |          |
| 10.0E-9                                                                                            |                        | 130.14   |
| 100.0E-9                                                                                           |                        | 125.08   |
| 1.0E-6                                                                                             |                        | 119.53   |
| 10.0E-6                                                                                            |                        | 87.85    |
| <b>3,4-DIMETHOXYCINNAMIC ACID</b>                                                                  |                        |          |
| 10.0E-9                                                                                            |                        | 132.86   |
| 100.0E-9                                                                                           |                        | 126.14   |
| 1.0E-6                                                                                             |                        | 124.51   |
| 10.0E-6                                                                                            |                        | 127.12   |
| <b>3,4-DIMETHOXYDALBERGIONE</b>                                                                    |                        |          |
| 10.0E-9                                                                                            |                        | 110.10   |
| 100.0E-9                                                                                           |                        | 114.02   |
| 1.0E-6                                                                                             |                        | 110.28   |
| 10.0E-6                                                                                            |                        | 7.52     |
| <b>3,4'-DIMETHOXYFLAVONE</b>                                                                       |                        |          |
| 10.0E-9                                                                                            |                        | 90.81    |
| 100.0E-9                                                                                           |                        | 62.92    |
| 1.0E-6                                                                                             |                        | 48.02    |
| 10.0E-6                                                                                            |                        | 41.23    |
| <b>3,6-DIMETHOXYFLAVONE</b>                                                                        |                        |          |
| 10.0E-9                                                                                            |                        | 103.76   |
| 100.0E-9                                                                                           |                        | 92.58    |
| 1.0E-6                                                                                             |                        | 89.59    |
| 10.0E-6                                                                                            |                        | 78.25    |
| <b>3,7-DIHYDROXYFLAVONE</b>                                                                        |                        |          |
| 10.0E-9                                                                                            |                        | 100.68   |
| 100.0E-9                                                                                           |                        | 99.85    |
| 1.0E-6                                                                                             |                        | 110.65   |
| 10.0E-6                                                                                            |                        | 91.78    |
| <b>3,7-DIMETHOXYFLAVONE</b>                                                                        |                        |          |
| 10.0E-9                                                                                            |                        | 99.17    |
| 100.0E-9                                                                                           |                        | 99.13    |
| 1.0E-6                                                                                             |                        | 95.51    |
| 10.0E-6                                                                                            |                        | 1.95     |
| <b>3,7-EPOXYCARYOPHYLLAN-6-OL</b>                                                                  |                        |          |
| 10.0E-9                                                                                            |                        | 119.95   |
| 100.0E-9                                                                                           |                        | 128.98   |
| 1.0E-6                                                                                             |                        | 113.91   |
| 10.0E-6                                                                                            |                        | 96.18    |
| <b>3,7-EPOXYCARYOPHYLLAN-6-ONE</b>                                                                 |                        |          |
| 10.0E-9                                                                                            |                        | 135.99   |
| 100.0E-9                                                                                           |                        | 118.79   |
| 1.0E-6                                                                                             |                        | 103.15   |
| 10.0E-6                                                                                            |                        | 108.42   |

| Compounds and Final Concentrations (M)                                   | Average of % Viability | Hits (✓) |
|--------------------------------------------------------------------------|------------------------|----------|
| <b>3-ACETAMIDOCOUMARIN</b>                                               |                        |          |
| 10.0E-9                                                                  |                        | 123.29   |
| 100.0E-9                                                                 |                        | 117.81   |
| 1.0E-6                                                                   |                        | 107.54   |
| 10.0E-6                                                                  |                        | 115.48   |
| <b>3-ACETOXPREGN-16-EN-12,20-DIONE</b>                                   |                        |          |
| 10.0E-9                                                                  |                        | 109.29   |
| 100.0E-9                                                                 |                        | 100.33   |
| 1.0E-6                                                                   |                        | 79.98    |
| 10.0E-6                                                                  |                        | 1.96     |
| <b>3-ACETYLCOUMARIN</b>                                                  |                        |          |
| 10.0E-9                                                                  |                        | 129.44   |
| 100.0E-9                                                                 |                        | 130.84   |
| 1.0E-6                                                                   |                        | 118.07   |
| 10.0E-6                                                                  |                        | 119.06   |
| <b>3alpha-ACETOXYDIHYDRODEOXYGEDUNIN</b>                                 |                        |          |
| 10.0E-9                                                                  |                        | 115.56   |
| 100.0E-9                                                                 |                        | 125.48   |
| 1.0E-6                                                                   |                        | 119.24   |
| 10.0E-6                                                                  |                        | 88.29    |
| <b>3alpha-HYDROXY-3-DEOXYANGOLESIC ACID METHYL ESTER</b>                 |                        |          |
| 10.0E-9                                                                  |                        | 112.41   |
| 100.0E-9                                                                 |                        | 108.26   |
| 1.0E-6                                                                   |                        | 97.82    |
| 10.0E-6                                                                  |                        | 90.58    |
| <b>3alpha-HYDROXY-4,4-BISNOR-8,11,13-PODOCARPATRIENE</b>                 |                        |          |
| 10.0E-9                                                                  |                        | 118.91   |
| 100.0E-9                                                                 |                        | 124.08   |
| 1.0E-6                                                                   |                        | 131.16   |
| 10.0E-6                                                                  |                        | 101.49   |
| <b>3-AMINO-1,2,4-TRIAZOLE</b>                                            |                        |          |
| 10.0E-9                                                                  |                        | 104.00   |
| 100.0E-9                                                                 |                        | 97.10    |
| 1.0E-6                                                                   |                        | 118.32   |
| 10.0E-6                                                                  |                        | 103.10   |
| <b>3-AMINO-beta-PINENE</b>                                               |                        |          |
| 10.0E-9                                                                  |                        | 125.93   |
| 100.0E-9                                                                 |                        | 124.18   |
| 1.0E-6                                                                   |                        | 114.08   |
| 10.0E-6                                                                  |                        | 120.53   |
| <b>3-AMINOPROPANESULPHONIC ACID</b>                                      |                        |          |
| 10.0E-9                                                                  |                        | 126.08   |
| 100.0E-9                                                                 |                        | 125.08   |
| 1.0E-6                                                                   |                        | 123.90   |
| 10.0E-6                                                                  |                        | 119.71   |
| <b>3beta-ACETOXYDEOXODIHYDROGEDUNIN</b>                                  |                        |          |
| 10.0E-9                                                                  |                        | 124.32   |
| 100.0E-9                                                                 |                        | 147.69   |
| 1.0E-6                                                                   |                        | 129.65   |
| 10.0E-6                                                                  |                        | 60.49    |
| <b>3beta-HYDROXY-23,24-BISNORCHOL-5-ENIC ACID</b>                        |                        |          |
| 10.0E-9                                                                  |                        | 126.14   |
| 100.0E-9                                                                 |                        | 124.01   |
| 1.0E-6                                                                   |                        | 26.64    |
| 10.0E-6                                                                  |                        | 1.81     |
| <b>3beta-HYDROXYDEOXODIHYDRODEOXYGEDUNIN</b>                             |                        |          |
| 10.0E-9                                                                  |                        | 133.49   |
| 100.0E-9                                                                 |                        | 131.42   |
| 1.0E-6                                                                   |                        | 103.07   |
| 10.0E-6                                                                  |                        | 89.38    |
| <b>3-BROMO-4-METHYL-3,4-HEXAMETHYLENE-3,4-DIHYDRODIAZETE-1,2-DIOXIDE</b> |                        |          |
| 10.0E-9                                                                  |                        | 114.44   |
| 100.0E-9                                                                 |                        | 114.26   |
| 1.0E-6                                                                   |                        | 109.30   |
| 10.0E-6                                                                  |                        | 22.84    |
| <b>3-DEACETYLKHIVORIN</b>                                                |                        |          |
| 10.0E-9                                                                  |                        | 113.25   |
| 100.0E-9                                                                 |                        | 131.35   |
| 1.0E-6                                                                   |                        | 96.01    |
| 10.0E-6                                                                  |                        | 90.69    |
| <b>3-DEOXO-3beta-ACETOXYDEOXYDIHYDROGEDUNIN</b>                          |                        |          |
| 10.0E-9                                                                  |                        | 130.20   |
| 100.0E-9                                                                 |                        | 107.77   |
| 1.0E-6                                                                   |                        | 96.80    |
| 10.0E-6                                                                  |                        | 63.04    |
| <b>3-DEOXO-3beta-HYDROXYMEXICANOLIDE 16-ENOL ETHER</b>                   |                        |          |
| 10.0E-9                                                                  |                        | 121.84   |
| 100.0E-9                                                                 |                        | 144.43   |
| 1.0E-6                                                                   |                        | 129.73   |
| 10.0E-6                                                                  |                        | 98.23    |

| Compounds and Final Concentrations (M)                           | Average of % Viability | Hits (✓) |
|------------------------------------------------------------------|------------------------|----------|
| <b>3-DEOXY-3beta-HYDROXYANGOLENSIC ACID METHYL ESTER</b>         |                        |          |
| 10.0E-9                                                          |                        | 122.07   |
| 100.0E-9                                                         |                        | 130.42   |
| 1.0E-6                                                           |                        | 107.15   |
| 10.0E-6                                                          |                        | 99.84    |
| <b>3-DESHYDROXYSAPPANOL TRIMETHYL ETHER</b>                      |                        |          |
| 10.0E-9                                                          |                        | 134.94   |
| 100.0E-9                                                         |                        | 135.27   |
| 1.0E-6                                                           |                        | 112.07   |
| 10.0E-6                                                          |                        | 65.18    |
| <b>3H-1,2-DITHIOLE-3-THIONE</b>                                  |                        |          |
| 10.0E-9                                                          |                        | 114.79   |
| 100.0E-9                                                         |                        | 119.74   |
| 1.0E-6                                                           |                        | 105.71   |
| 10.0E-6                                                          |                        | 96.52    |
| <b>3-HYDROXY-3',4'-DIMETHOXYFLAVONE</b>                          |                        |          |
| 10.0E-9                                                          |                        | 93.71    |
| 100.0E-9                                                         |                        | 101.62   |
| 1.0E-6                                                           |                        | 102.46   |
| 10.0E-6                                                          |                        | 99.40    |
| <b>3-HYDROXY-4-(SUCCIN-2-YL)-CARYOLANE delta-LACTONE</b>         |                        |          |
| 10.0E-9                                                          |                        | 120.70   |
| 100.0E-9                                                         |                        | 126.33   |
| 1.0E-6                                                           |                        | 127.12   |
| 10.0E-6                                                          |                        | 78.17    |
| <b>3-HYDROXYFLAVONE</b>                                          |                        |          |
| 10.0E-9                                                          |                        | 117.44   |
| 100.0E-9                                                         |                        | 123.65   |
| 1.0E-6                                                           |                        | 123.17   |
| 10.0E-6                                                          |                        | 55.62    |
| <b>3-HYDROXYTYRAMINE</b>                                         |                        |          |
| 10.0E-9                                                          |                        | 118.54   |
| 100.0E-9                                                         |                        | 116.82   |
| 1.0E-6                                                           |                        | 102.39   |
| 10.0E-6                                                          |                        | 106.10   |
| <b>3-ISOBUTYL-1-METHYLXANTHINE (IBMX)</b>                        |                        |          |
| 10.0E-9                                                          |                        | 126.56   |
| 100.0E-9                                                         |                        | 116.78   |
| 1.0E-6                                                           |                        | 125.89   |
| 10.0E-6                                                          |                        | 118.03   |
| <b>3-METHOXYCATECHOL</b>                                         |                        |          |
| 10.0E-9                                                          |                        | 143.58   |
| 100.0E-9                                                         |                        | 133.60   |
| 1.0E-6                                                           |                        | 92.77    |
| 10.0E-6                                                          |                        | 9.19     |
| <b>3-METHYLORSELLINIC ACID</b>                                   |                        |          |
| 10.0E-9                                                          |                        | 124.97   |
| 100.0E-9                                                         |                        | 137.75   |
| 1.0E-6                                                           |                        | 115.09   |
| 10.0E-6                                                          |                        | 115.06   |
| <b>3-METHYLXANTHINE</b>                                          |                        |          |
| 10.0E-9                                                          |                        | 95.14    |
| 100.0E-9                                                         |                        | 100.97   |
| 1.0E-6                                                           |                        | 131.96   |
| 10.0E-6                                                          |                        | 105.26   |
| <b>3-NOR-3-OXOPANASINSAN-6-OL</b>                                |                        |          |
| 10.0E-9                                                          |                        | 124.27   |
| 100.0E-9                                                         |                        | 134.68   |
| 1.0E-6                                                           |                        | 114.56   |
| 10.0E-6                                                          |                        | 118.82   |
| <b>3-OXOURSAN (28-13)OLIDE</b>                                   |                        |          |
| 10.0E-9                                                          |                        | 108.78   |
| 100.0E-9                                                         |                        | 110.32   |
| 1.0E-6                                                           |                        | 99.53    |
| 10.0E-6                                                          |                        | 81.42    |
| <b>4-(3-BUTOXY-4-METHOXYBENZYL)IMIDAZOLIDIN-2-ONE</b>            |                        |          |
| 10.0E-9                                                          |                        | 128.47   |
| 100.0E-9                                                         |                        | 117.68   |
| 1.0E-6                                                           |                        | 122.16   |
| 10.0E-6                                                          |                        | 122.36   |
| <b>4,4'-DIISOTHIOCYANOSTILBENE-2,2'-SUFONIC ACID SODIUM SALT</b> |                        |          |
| 10.0E-9                                                          |                        | 113.65   |
| 100.0E-9                                                         |                        | 119.06   |
| 1.0E-6                                                           |                        | 128.35   |
| 10.0E-6                                                          |                        | 124.87   |
| <b>4,4'-DIMETHOXYDALBERGIONE</b>                                 |                        |          |
| 10.0E-9                                                          |                        | 122.82   |
| 100.0E-9                                                         |                        | 114.95   |
| 1.0E-6                                                           |                        | 108.17   |
| 10.0E-6                                                          |                        | 49.13    |

| Compounds and Final Concentrations (M) | Average of % Viability | Hits (✓) |
|----------------------------------------|------------------------|----------|
| <b>4-ACETOXYPHENOL</b>                 |                        |          |
| 10.0E-9                                |                        | 116.36   |
| 100.0E-9                               |                        | 118.82   |
| 1.0E-6                                 |                        | 118.38   |
| 10.0E-6                                |                        | 2.61     |
| <b>4'-DEMETHYLEPIPODOPHYLLOTOXIN</b>   |                        |          |
| 10.0E-9                                |                        | 102.91   |
| 100.0E-9                               |                        | 0.92     |
| 1.0E-6                                 |                        | 1.58     |
| 10.0E-6                                |                        | 3.41     |
| <b>4-HYDROXY-6-METHYLPYRAN-2-ONE</b>   |                        |          |
| 10.0E-9                                |                        | 118.81   |
| 100.0E-9                               |                        | 136.07   |
| 1.0E-6                                 |                        | 107.53   |
| 10.0E-6                                |                        | 109.71   |
| <b>4-HYDROXYANTIPYRINE</b>             |                        |          |
| 10.0E-9                                |                        | 125.16   |
| 100.0E-9                               |                        | 123.15   |
| 1.0E-6                                 |                        | 110.58   |
| 10.0E-6                                |                        | 120.23   |
| <b>4'-HYDROXYCHALCONE</b>              |                        |          |
| 10.0E-9                                |                        | 98.23    |
| 100.0E-9                               |                        | 111.67   |
| 1.0E-6                                 |                        | 92.52    |
| 10.0E-6                                |                        | 33.32    |
| <b>4'-METHOXYCHALCONE</b>              |                        |          |
| 10.0E-9                                |                        | 125.23   |
| 100.0E-9                               |                        | 112.70   |
| 1.0E-6                                 |                        | 112.89   |
| 10.0E-6                                |                        | 2.02     |
| <b>4'-METHOXYFLAVONE</b>               |                        |          |
| 10.0E-9                                |                        | 107.45   |
| 100.0E-9                               |                        | 103.80   |
| 1.0E-6                                 |                        | 118.95   |
| 10.0E-6                                |                        | 118.82   |
| <b>4-METHYLDAPHNETIN</b>               |                        |          |
| 10.0E-9                                |                        | 116.65   |
| 100.0E-9                               |                        | 97.67    |
| 1.0E-6                                 |                        | 86.75    |
| 10.0E-6                                |                        | 18.01    |
| <b>4-METHYLESCULETIN</b>               |                        |          |
| 10.0E-9                                |                        | 109.86   |
| 100.0E-9                               |                        | 95.64    |
| 1.0E-6                                 |                        | 105.58   |
| 10.0E-6                                |                        | 92.67    |
| <b>4-NAPHTHALIMIDOBUTYRIC ACID</b>     |                        |          |
| 10.0E-9                                |                        | 126.01   |
| 100.0E-9                               |                        | 116.28   |
| 1.0E-6                                 |                        | 111.27   |
| 10.0E-6                                |                        | 125.78   |
| <b>4-O-METHYLPHLORACETOPHENONE</b>     |                        |          |
| 10.0E-9                                |                        | 119.95   |
| 100.0E-9                               |                        | 108.20   |
| 1.0E-6                                 |                        | 91.93    |
| 10.0E-6                                |                        | 94.13    |
| <b>5,7-DIHYDROXY-4-METHYLCOUMARIN</b>  |                        |          |
| 10.0E-9                                |                        | 103.48   |
| 100.0E-9                               |                        | 95.35    |
| 1.0E-6                                 |                        | 103.47   |
| 10.0E-6                                |                        | 97.49    |
| <b>5,7-DIHYDROXYISOFLAVONE</b>         |                        |          |
| 10.0E-9                                |                        | 123.24   |
| 100.0E-9                               |                        | 119.88   |
| 1.0E-6                                 |                        | 113.08   |
| 10.0E-6                                |                        | 113.29   |
| <b>5alpha-ANDROSTAN-3,17-DIONE</b>     |                        |          |
| 10.0E-9                                |                        | 127.56   |
| 100.0E-9                               |                        | 117.42   |
| 1.0E-6                                 |                        | 101.29   |
| 10.0E-6                                |                        | 106.22   |
| <b>5alpha-CHOLESTAN-3beta-OL-6-ONE</b> |                        |          |
| 10.0E-9                                |                        | 139.92   |
| 100.0E-9                               |                        | 133.59   |
| 1.0E-6                                 |                        | 113.18   |
| 10.0E-6                                |                        | 0.88     |
| <b>5alpha-CHOLESTANOL</b>              |                        |          |
| 10.0E-9                                |                        | 115.77   |
| 100.0E-9                               |                        | 104.40   |
| 1.0E-6                                 |                        | 109.60   |
| 10.0E-6                                |                        | 99.67    |



| Compounds and Final Concentrations (M)                          | Average of % Viability | Hits (✓) |
|-----------------------------------------------------------------|------------------------|----------|
| <b>5-AMINOPENTANOIC ACID HYDROCHLORIDE</b>                      |                        |          |
| 10.0E-9                                                         |                        | 120.17   |
| 100.0E-9                                                        |                        | 106.76   |
| 1.0E-6                                                          |                        | 106.30   |
| 10.0E-6                                                         |                        | 115.52   |
| <b>5beta-12-METHOXY-4,4-BISNOR-8,11,13-PODOCARPATRIEN-3-ONE</b> |                        |          |
| 10.0E-9                                                         |                        | 110.95   |
| 100.0E-9                                                        |                        | 118.87   |
| 1.0E-6                                                          |                        | 121.21   |
| 10.0E-6                                                         |                        | 119.76   |
| <b>5-FLUOROINDOLE-2-CARBOXYLIC ACID</b>                         |                        |          |
| 10.0E-9                                                         |                        | 117.36   |
| 100.0E-9                                                        |                        | 114.74   |
| 1.0E-6                                                          |                        | 99.89    |
| 10.0E-6                                                         |                        | 109.04   |
| <b>5-HYDROXY-2',4',7,8-TETRAMETHOXYFLAVONE</b>                  |                        |          |
| 10.0E-9                                                         |                        | 117.55   |
| 100.0E-9                                                        |                        | 109.76   |
| 1.0E-6                                                          |                        | 101.72   |
| 10.0E-6                                                         |                        | 94.89    |
| <b>5-METHYLFURMETHIDE</b>                                       |                        |          |
| 10.0E-9                                                         |                        | 96.60    |
| 100.0E-9                                                        |                        | 98.05    |
| 1.0E-6                                                          |                        | 96.32    |
| 10.0E-6                                                         |                        | 83.99    |
| <b>5-METHYLHYDANTOIN</b>                                        |                        |          |
| 10.0E-9                                                         |                        | 130.87   |
| 100.0E-9                                                        |                        | 121.65   |
| 1.0E-6                                                          |                        | 106.84   |
| 10.0E-6                                                         |                        | 110.67   |
| <b>6,2'-DIMETHOXYFLAVONE</b>                                    |                        |          |
| 10.0E-9                                                         |                        | 126.93   |
| 100.0E-9                                                        |                        | 123.29   |
| 1.0E-6                                                          |                        | 108.28   |
| 10.0E-6                                                         |                        | 80.66    |
| <b>6,3'-DIMETHOXYFLAVONE</b>                                    |                        |          |
| 10.0E-9                                                         |                        | 97.75    |
| 100.0E-9                                                        |                        | 98.63    |
| 1.0E-6                                                          |                        | 103.33   |
| 10.0E-6                                                         |                        | 55.34    |
| <b>6,4'-DIHYDROXYFLAVONE</b>                                    |                        |          |
| 10.0E-9                                                         |                        | 131.95   |
| 100.0E-9                                                        |                        | 126.32   |
| 1.0E-6                                                          |                        | 114.02   |
| 10.0E-6                                                         |                        | 109.87   |
| <b>6,7-DICHLORO-3-HYDROXY-2-QUINOXALINECARBOXYLIC ACID</b>      |                        |          |
| 10.0E-9                                                         |                        | 109.65   |
| 100.0E-9                                                        |                        | 121.32   |
| 1.0E-6                                                          |                        | 109.41   |
| 10.0E-6                                                         |                        | 110.35   |
| <b>6alpha-METHYLPREDNISOLONE ACETATE</b>                        |                        |          |
| 10.0E-9                                                         |                        | 114.67   |
| 100.0E-9                                                        |                        | 105.80   |
| 1.0E-6                                                          |                        | 106.93   |
| 10.0E-6                                                         |                        | 113.85   |
| <b>6-AMINONICOTINAMIDE</b>                                      |                        |          |
| 10.0E-9                                                         |                        | 125.49   |
| 100.0E-9                                                        |                        | 112.49   |
| 1.0E-6                                                          |                        | 107.49   |
| 10.0E-6                                                         |                        | 19.22    |
| <b>6-HYDROXYANGOLENSIC ACID METHYL ESTER</b>                    |                        |          |
| 10.0E-9                                                         |                        | 134.79   |
| 100.0E-9                                                        |                        | 120.47   |
| 1.0E-6                                                          |                        | 119.98   |
| 10.0E-6                                                         |                        | 97.26    |
| <b>6-HYDROXYTROPINONE</b>                                       |                        |          |
| 10.0E-9                                                         |                        | 122.44   |
| 100.0E-9                                                        |                        | 113.34   |
| 1.0E-6                                                          |                        | 113.17   |
| 10.0E-6                                                         |                        | 20.03    |
| <b>7,2'-DIHYDROXYFLAVONE</b>                                    |                        |          |
| 10.0E-9                                                         |                        | 112.86   |
| 100.0E-9                                                        |                        | 113.52   |
| 1.0E-6                                                          |                        | 105.23   |
| 10.0E-6                                                         |                        | 105.27   |
| <b>7,4'-DIHYDROXYFLAVONE</b>                                    |                        |          |
| 10.0E-9                                                         |                        | 128.37   |
| 100.0E-9                                                        |                        | 115.50   |
| 1.0E-6                                                          |                        | 105.30   |
| 10.0E-6                                                         |                        | 104.98   |

| Compounds and Final Concentrations (M)          | Average of % Viability | Hits (✓) |
|-------------------------------------------------|------------------------|----------|
| <b>7,4'-DIMETHOXYISOFLAVONE</b>                 |                        |          |
| 10.0E-9                                         |                        | 117.46   |
| 100.0E-9                                        |                        | 119.47   |
| 1.0E-6                                          |                        | 125.40   |
| 10.0E-6                                         |                        | 108.88   |
| <b>7,8-DIHYDROXYFLAVONE</b>                     |                        |          |
| 10.0E-9                                         |                        | 118.96   |
| 100.0E-9                                        |                        | 123.42   |
| 1.0E-6                                          |                        | 103.32   |
| 10.0E-6                                         |                        | 8.57     |
| <b>7-AMINOCEPHALOSPORANIC ACID</b>              |                        |          |
| 10.0E-9                                         |                        | 99.94    |
| 100.0E-9                                        |                        | 111.60   |
| 1.0E-6                                          |                        | 111.53   |
| 10.0E-6                                         |                        | 111.07   |
| <b>7-DEACETOXY-7-OXOKHIVORIN</b>                |                        |          |
| 10.0E-9                                         |                        | 129.47   |
| 100.0E-9                                        |                        | 123.32   |
| 1.0E-6                                          |                        | 122.14   |
| 10.0E-6                                         |                        | 106.34   |
| <b>7-DEACETYLKHIVORIN</b>                       |                        |          |
| 10.0E-9                                         |                        | 140.54   |
| 100.0E-9                                        |                        | 152.14   |
| 1.0E-6                                          |                        | 126.15   |
| 10.0E-6                                         |                        | 100.07   |
| <b>7-DESACETOXY-6,7-DEHYDROGEDUNIN</b>          |                        |          |
| 10.0E-9                                         |                        | 116.99   |
| 100.0E-9                                        |                        | 130.78   |
| 1.0E-6                                          |                        | 81.46    |
| 10.0E-6                                         |                        | 2.09     |
| <b>7-DESHYDROXYPYROGALLIN-4-CARBOXYLIC ACID</b> |                        |          |
| 10.0E-9                                         |                        | 138.47   |
| 100.0E-9                                        |                        | 121.81   |
| 1.0E-6                                          |                        | 119.64   |
| 10.0E-6                                         |                        | 97.22    |
| <b>7-HYDROXYFLAVONE</b>                         |                        |          |
| 10.0E-9                                         |                        | 115.07   |
| 100.0E-9                                        |                        | 114.65   |
| 1.0E-6                                          |                        | 119.14   |
| 10.0E-6                                         |                        | 112.07   |
| <b>7-NITROINDAZOLE</b>                          |                        |          |
| 10.0E-9                                         |                        | 119.30   |
| 100.0E-9                                        |                        | 114.05   |
| 1.0E-6                                          |                        | 149.28   |
| 10.0E-6                                         |                        | 135.72   |
| <b>7-OXOCHOLESTEROL</b>                         |                        |          |
| 10.0E-9                                         |                        | 106.08   |
| 100.0E-9                                        |                        | 95.60    |
| 1.0E-6                                          |                        | 113.42   |
| 10.0E-6                                         |                        | 63.78    |
| <b>7-OXOCHOLESTERYL ACETATE</b>                 |                        |          |
| 10.0E-9                                         |                        | 122.67   |
| 100.0E-9                                        |                        | 108.34   |
| 1.0E-6                                          |                        | 112.21   |
| 10.0E-6                                         |                        | 114.08   |
| <b>8beta-HYDROXYCARAPIN, 3,8-HEMIACETAL</b>     |                        |          |
| 10.0E-9                                         |                        | 140.15   |
| 100.0E-9                                        |                        | 141.88   |
| 1.0E-6                                          |                        | 129.30   |
| 10.0E-6                                         |                        | 114.58   |
| <b>8-CYCLOPENTYLTHEOPHYLLINE</b>                |                        |          |
| 10.0E-9                                         |                        | 117.53   |
| 100.0E-9                                        |                        | 107.29   |
| 1.0E-6                                          |                        | 126.17   |
| 10.0E-6                                         |                        | 104.32   |
| <b>8-HYDROXYCARAPINIC ACID</b>                  |                        |          |
| 10.0E-9                                         |                        | 112.72   |
| 100.0E-9                                        |                        | 112.69   |
| 1.0E-6                                          |                        | 100.34   |
| 10.0E-6                                         |                        | 107.73   |
| <b>ABAMECTIN</b>                                |                        |          |
| 10.0E-9                                         |                        | 119.46   |
| 100.0E-9                                        |                        | 99.22    |
| 1.0E-6                                          |                        | 91.51    |
| 10.0E-6                                         |                        | 1.18     |
| <b>ABIETIC ACID</b>                             |                        |          |
| 10.0E-9                                         |                        | 108.08   |
| 100.0E-9                                        |                        | 118.71   |
| 1.0E-6                                          |                        | 111.90   |
| 10.0E-6                                         |                        | 108.39   |

| Compounds and Final Concentrations (M) | Average of % Viability | Hits (✓) |
|----------------------------------------|------------------------|----------|
| <b>ACACETIN</b>                        |                        |          |
| 10.0E-9                                |                        | 118.00   |
| 100.0E-9                               |                        | 130.65   |
| 1.0E-6                                 |                        | 116.86   |
| 10.0E-6                                |                        | 128.62   |
| <b>ACACETIN DIACETATE</b>              |                        |          |
| 10.0E-9                                |                        | 124.60   |
| 100.0E-9                               |                        | 128.27   |
| 1.0E-6                                 |                        | 120.15   |
| 10.0E-6                                |                        | 112.25   |
| <b>ACADESINE</b>                       |                        |          |
| 10.0E-9                                |                        | 122.40   |
| 100.0E-9                               |                        | 116.46   |
| 1.0E-6                                 |                        | 51.50    |
| 10.0E-6                                |                        | 2.67     |
| <b>ACAMPROSATE CALCIUM</b>             |                        |          |
| 10.0E-9                                |                        | 84.54    |
| 100.0E-9                               |                        | 88.34    |
| 1.0E-6                                 |                        | 87.21    |
| 10.0E-6                                |                        | 80.30    |
| <b>ACARBOSE</b>                        |                        |          |
| 10.0E-9                                |                        | 120.66   |
| 100.0E-9                               |                        | 99.76    |
| 1.0E-6                                 |                        | 99.11    |
| 10.0E-6                                |                        | 27.80    |
| <b>ACEBUTOLOL HYDROCHLORIDE</b>        |                        |          |
| 10.0E-9                                |                        | 108.61   |
| 100.0E-9                               |                        | 116.68   |
| 1.0E-6                                 |                        | 100.69   |
| 10.0E-6                                |                        | 98.70    |
| <b>ACECAINIDE HYDROCHLORIDE</b>        |                        |          |
| 10.0E-9                                |                        | 117.31   |
| 100.0E-9                               |                        | 128.24   |
| 1.0E-6                                 |                        | 118.81   |
| 10.0E-6                                |                        | 110.89   |
| <b>ACECLIDINE</b>                      |                        |          |
| 10.0E-9                                |                        | 70.83    |
| 100.0E-9                               |                        | 75.24    |
| 1.0E-6                                 |                        | 88.59    |
| 10.0E-6                                |                        | 82.89    |
| <b>ACEDAPSONE</b>                      |                        |          |
| 10.0E-9                                |                        | 105.23   |
| 100.0E-9                               |                        | 106.05   |
| 1.0E-6                                 |                        | 103.33   |
| 10.0E-6                                |                        | 95.99    |
| <b>ACEMETACIN</b>                      |                        |          |
| 10.0E-9                                |                        | 107.09   |
| 100.0E-9                               |                        | 97.64    |
| 1.0E-6                                 |                        | 104.27   |
| 10.0E-6                                |                        | 95.05    |
| <b>ACEPROMAZINE MALEATE</b>            |                        |          |
| 10.0E-9                                |                        | 119.07   |
| 100.0E-9                               |                        | 112.76   |
| 1.0E-6                                 |                        | 105.74   |
| 10.0E-6                                |                        | 108.89   |
| <b>ACETAMINOPHEN</b>                   |                        |          |
| 10.0E-9                                |                        | 107.82   |
| 100.0E-9                               |                        | 114.19   |
| 1.0E-6                                 |                        | 110.37   |
| 10.0E-6                                |                        | 108.53   |
| <b>ACETAMINOSALOL</b>                  |                        |          |
| 10.0E-9                                |                        | 108.93   |
| 100.0E-9                               |                        | 108.85   |
| 1.0E-6                                 |                        | 117.80   |
| 10.0E-6                                |                        | 115.26   |
| <b>ACETANILIDE</b>                     |                        |          |
| 10.0E-9                                |                        | 100.23   |
| 100.0E-9                               |                        | 111.35   |
| 1.0E-6                                 |                        | 121.35   |
| 10.0E-6                                |                        | 107.27   |
| <b>ACETARSOL</b>                       |                        |          |
| 10.0E-9                                |                        | 133.36   |
| 100.0E-9                               |                        | 116.39   |
| 1.0E-6                                 |                        | 98.87    |
| 10.0E-6                                |                        | 109.70   |
| <b>ACETAZOLAMIDE</b>                   |                        |          |
| 10.0E-9                                |                        | 112.37   |
| 100.0E-9                               |                        | 113.90   |
| 1.0E-6                                 |                        | 115.57   |
| 10.0E-6                                |                        | 75.28    |

| Compounds and Final Concentrations (M) | Average of % Viability | Hits (✓) |
|----------------------------------------|------------------------|----------|
| <b>ACETOHEXAMIDE</b>                   |                        |          |
| 10.0E-9                                |                        | 99.16    |
| 100.0E-9                               |                        | 115.08   |
| 1.0E-6                                 |                        | 125.28   |
| 10.0E-6                                |                        | 126.63   |
| <b>ACETOHYDROXAMIC ACID</b>            |                        |          |
| 10.0E-9                                |                        | 139.50   |
| 100.0E-9                               |                        | 127.38   |
| 1.0E-6                                 |                        | 123.56   |
| 10.0E-6                                |                        | 106.59   |
| <b>ACETOSYRINGONE</b>                  |                        |          |
| 10.0E-9                                |                        | 111.04   |
| 100.0E-9                               |                        | 116.92   |
| 1.0E-6                                 |                        | 105.71   |
| 10.0E-6                                |                        | 110.68   |
| <b>ACETRIAZOIC ACID</b>                |                        |          |
| 10.0E-9                                |                        | 106.82   |
| 100.0E-9                               |                        | 95.70    |
| 1.0E-6                                 |                        | 101.73   |
| 10.0E-6                                |                        | 83.95    |
| <b>ACETYL ISOGAMBOGIC ACID</b>         |                        |          |
| 10.0E-9                                |                        | 116.48   |
| 100.0E-9                               |                        | 101.74   |
| 1.0E-6                                 |                        | 52.49    |
| 10.0E-6                                |                        | 0.07     |
| <b>ACETYLC HOLINE</b>                  |                        |          |
| 10.0E-9                                |                        | 106.48   |
| 100.0E-9                               |                        | 120.26   |
| 1.0E-6                                 |                        | 107.72   |
| 10.0E-6                                |                        | 106.77   |
| <b>ACETYLCYSTEINE</b>                  |                        |          |
| 10.0E-9                                |                        | 103.33   |
| 100.0E-9                               |                        | 97.35    |
| 1.0E-6                                 |                        | 116.79   |
| 10.0E-6                                |                        | 105.24   |
| <b>ACETYLG LUCOSAMINE</b>              |                        |          |
| 10.0E-9                                |                        | 116.54   |
| 100.0E-9                               |                        | 114.87   |
| 1.0E-6                                 |                        | 118.08   |
| 10.0E-6                                |                        | 111.19   |
| <b>ACETYLG LUTAMIC ACID</b>            |                        |          |
| 10.0E-9                                |                        | 102.51   |
| 100.0E-9                               |                        | 107.34   |
| 1.0E-6                                 |                        | 132.84   |
| 10.0E-6                                |                        | 103.86   |
| <b>ACETYL-L-LEUCINE</b>                |                        |          |
| 10.0E-9                                |                        | 107.94   |
| 100.0E-9                               |                        | 105.28   |
| 1.0E-6                                 |                        | 110.22   |
| 10.0E-6                                |                        | 116.25   |
| <b>ACETYLP HENYLALANINE</b>            |                        |          |
| 10.0E-9                                |                        | 111.22   |
| 100.0E-9                               |                        | 99.51    |
| 1.0E-6                                 |                        | 111.48   |
| 10.0E-6                                |                        | 92.30    |
| <b>ACETYLTRYPTOPHAN</b>                |                        |          |
| 10.0E-9                                |                        | 118.74   |
| 100.0E-9                               |                        | 108.75   |
| 1.0E-6                                 |                        | 108.03   |
| 10.0E-6                                |                        | 106.75   |
| <b>ACETYLTRYPTOPHANAMIDE</b>           |                        |          |
| 10.0E-9                                |                        | 115.96   |
| 100.0E-9                               |                        | 107.44   |
| 1.0E-6                                 |                        | 104.73   |
| 10.0E-6                                |                        | 103.18   |
| <b>ACEXAMIC ACID</b>                   |                        |          |
| 10.0E-9                                |                        | 91.32    |
| 100.0E-9                               |                        | 96.53    |
| 1.0E-6                                 |                        | 111.04   |
| 10.0E-6                                |                        | 95.35    |
| <b>ACONITIC ACID</b>                   |                        |          |
| 10.0E-9                                |                        | 116.81   |
| 100.0E-9                               |                        | 133.73   |
| 1.0E-6                                 |                        | 120.26   |
| 10.0E-6                                |                        | 117.24   |
| <b>ACRIFLAVINIUM HYDROCHLORIDE</b>     |                        |          |
| 10.0E-9                                |                        | 108.06   |
| 100.0E-9                               |                        | 124.68   |
| 1.0E-6                                 |                        | 16.11    |
| 10.0E-6                                |                        | 0.85     |

| Compounds and Final Concentrations (M)                  | Average of % Viability | Hits (✓) |
|---------------------------------------------------------|------------------------|----------|
| <b>ACRISORCIN</b>                                       |                        |          |
| 10.0E-9                                                 |                        | 92.23    |
| 100.0E-9                                                |                        | 89.55    |
| 1.0E-6                                                  |                        | 90.67    |
| 10.0E-6                                                 |                        | 2.34     |
| <b>ACTINONIN</b>                                        |                        |          |
| 10.0E-9                                                 |                        | 111.42   |
| 100.0E-9                                                |                        | 115.62   |
| 1.0E-6                                                  |                        | 116.96   |
| 10.0E-6                                                 |                        | 87.25    |
| <b>ACYCLOVIR</b>                                        |                        |          |
| 10.0E-9                                                 |                        | 118.98   |
| 100.0E-9                                                |                        | 122.61   |
| 1.0E-6                                                  |                        | 115.19   |
| 10.0E-6                                                 |                        | 115.61   |
| <b>ADENINE</b>                                          |                        |          |
| 10.0E-9                                                 |                        | 110.15   |
| 100.0E-9                                                |                        | 99.17    |
| 1.0E-6                                                  |                        | 101.33   |
| 10.0E-6                                                 |                        | 118.01   |
| <b>ADENOSINE</b>                                        |                        |          |
| 10.0E-9                                                 |                        | 83.39    |
| 100.0E-9                                                |                        | 103.44   |
| 1.0E-6                                                  |                        | 111.89   |
| 10.0E-6                                                 |                        | 99.49    |
| <b>ADENOSINE PHOSPHATE</b>                              |                        |          |
| 10.0E-9                                                 |                        | 118.98   |
| 100.0E-9                                                |                        | 101.81   |
| 1.0E-6                                                  |                        | 110.77   |
| 10.0E-6                                                 |                        | 93.13    |
| <b>ADIPHENINE HYDROCHLORIDE</b>                         |                        |          |
| 10.0E-9                                                 |                        | 117.76   |
| 100.0E-9                                                |                        | 116.50   |
| 1.0E-6                                                  |                        | 111.36   |
| 10.0E-6                                                 |                        | 109.09   |
| <b>ADONITOL</b>                                         |                        |          |
| 10.0E-9                                                 |                        | 117.99   |
| 100.0E-9                                                |                        | 108.37   |
| 1.0E-6                                                  |                        | 105.49   |
| 10.0E-6                                                 |                        | 4.73     |
| <b>ADRENALINE BITARTRATE</b>                            |                        |          |
| 10.0E-9                                                 |                        | 94.57    |
| 100.0E-9                                                |                        | 88.35    |
| 1.0E-6                                                  |                        | 85.45    |
| 10.0E-6                                                 |                        | 86.99    |
| <b>AESCULIN</b>                                         |                        |          |
| 10.0E-9                                                 |                        | 102.22   |
| 100.0E-9                                                |                        | 118.76   |
| 1.0E-6                                                  |                        | 104.58   |
| 10.0E-6                                                 |                        | 99.71    |
| <b>AGARIC ACID</b>                                      |                        |          |
| 10.0E-9                                                 |                        | 100.47   |
| 100.0E-9                                                |                        | 91.85    |
| 1.0E-6                                                  |                        | 101.31   |
| 10.0E-6                                                 |                        | 68.85    |
| <b>AGELASINE (stereochemistry of diterpene unknown)</b> |                        |          |
| 10.0E-9                                                 |                        | 112.10   |
| 100.0E-9                                                |                        | 152.26   |
| 1.0E-6                                                  |                        | 106.34   |
| 10.0E-6                                                 |                        | 65.47    |
| <b>AGMATINE SULFATE</b>                                 |                        |          |
| 10.0E-9                                                 |                        | 106.11   |
| 100.0E-9                                                |                        | 103.82   |
| 1.0E-6                                                  |                        | 112.62   |
| 10.0E-6                                                 |                        | 110.43   |
| <b>AJMALINE</b>                                         |                        |          |
| 10.0E-9                                                 |                        | 110.38   |
| 100.0E-9                                                |                        | 105.37   |
| 1.0E-6                                                  |                        | 102.76   |
| 10.0E-6                                                 |                        | 86.69    |
| <b>AKLOMIDE</b>                                         |                        |          |
| 10.0E-9                                                 |                        | 123.88   |
| 100.0E-9                                                |                        | 117.53   |
| 1.0E-6                                                  |                        | 113.22   |
| 10.0E-6                                                 |                        | 113.10   |
| <b>ALANYL-dl-LEUCINE</b>                                |                        |          |
| 10.0E-9                                                 |                        | 107.78   |
| 100.0E-9                                                |                        | 110.89   |
| 1.0E-6                                                  |                        | 109.58   |
| 10.0E-6                                                 |                        | 116.02   |

| Compounds and Final Concentrations (M) | Average of % Viability | Hits (✓) |
|----------------------------------------|------------------------|----------|
| <b>ALAPROCLATE</b>                     |                        |          |
| 10.0E-9                                |                        | 103.13   |
| 100.0E-9                               |                        | 90.97    |
| 1.0E-6                                 |                        | 88.29    |
| 10.0E-6                                |                        | 80.38    |
| <b>ALBENDAZOLE</b>                     |                        |          |
| 10.0E-9                                |                        | 109.07   |
| 100.0E-9                               |                        | 110.02   |
| 1.0E-6                                 |                        | 89.74    |
| 10.0E-6                                |                        | 0.99     |
| <b>ALBUTEROL (+/-)</b>                 |                        |          |
| 10.0E-9                                |                        | 107.65   |
| 100.0E-9                               |                        | 100.43   |
| 1.0E-6                                 |                        | 101.09   |
| 10.0E-6                                |                        | 107.64   |
| <b>ALCLOMETAZONE DIPROPIONATE</b>      |                        |          |
| 10.0E-9                                |                        | 109.03   |
| 100.0E-9                               |                        | 118.78   |
| 1.0E-6                                 |                        | 102.45   |
| 10.0E-6                                |                        | 106.28   |
| <b>ALENDRONATE SODIUM</b>              |                        |          |
| 10.0E-9                                |                        | 122.97   |
| 100.0E-9                               |                        | 116.49   |
| 1.0E-6                                 |                        | 104.44   |
| 10.0E-6                                |                        | 110.40   |
| <b>ALEURETIC ACID</b>                  |                        |          |
| 10.0E-9                                |                        | 100.91   |
| 100.0E-9                               |                        | 86.07    |
| 1.0E-6                                 |                        | 89.25    |
| 10.0E-6                                |                        | 92.17    |
| <b>ALEXIDINE HYDROCHLORIDE</b>         |                        |          |
| 10.0E-9                                |                        | 110.43   |
| 100.0E-9                               |                        | 102.68   |
| 1.0E-6                                 |                        | 103.80   |
| 10.0E-6                                |                        | 0.75     |
| <b>ALFAXALONE</b>                      |                        |          |
| 10.0E-9                                |                        | 100.68   |
| 100.0E-9                               |                        | 120.09   |
| 1.0E-6                                 |                        | 119.89   |
| 10.0E-6                                |                        | 121.42   |
| <b>ALFLUZOSIN</b>                      |                        |          |
| 10.0E-9                                |                        | 126.18   |
| 100.0E-9                               |                        | 115.49   |
| 1.0E-6                                 |                        | 106.58   |
| 10.0E-6                                |                        | 107.91   |
| <b>ALISKIREN HEMIFUMARATE</b>          |                        |          |
| 10.0E-9                                |                        | 84.06    |
| 100.0E-9                               |                        | 81.30    |
| 1.0E-6                                 |                        | 78.34    |
| 10.0E-6                                |                        | 85.08    |
| <b>ALIZARIN</b>                        |                        |          |
| 10.0E-9                                |                        | 143.70   |
| 100.0E-9                               |                        | 101.77   |
| 1.0E-6                                 |                        | 106.23   |
| 10.0E-6                                |                        | 88.40    |
| <b>ALLANTOIN</b>                       |                        |          |
| 10.0E-9                                |                        | 121.06   |
| 100.0E-9                               |                        | 97.10    |
| 1.0E-6                                 |                        | 105.72   |
| 10.0E-6                                |                        | 94.01    |
| <b>ALLOPREGNANOLONE</b>                |                        |          |
| 10.0E-9                                |                        | 117.05   |
| 100.0E-9                               |                        | 127.86   |
| 1.0E-6                                 |                        | 123.82   |
| 10.0E-6                                |                        | 97.39    |
| <b>ALLOPURINOL</b>                     |                        |          |
| 10.0E-9                                |                        | 104.25   |
| 100.0E-9                               |                        | 112.20   |
| 1.0E-6                                 |                        | 107.13   |
| 10.0E-6                                |                        | 109.85   |
| <b>ALLOXAN</b>                         |                        |          |
| 10.0E-9                                |                        | 98.61    |
| 100.0E-9                               |                        | 98.37    |
| 1.0E-6                                 |                        | 114.62   |
| 10.0E-6                                |                        | 96.19    |
| <b>ALOIN</b>                           |                        |          |
| 10.0E-9                                |                        | 119.55   |
| 100.0E-9                               |                        | 124.94   |
| 1.0E-6                                 |                        | 121.08   |
| 10.0E-6                                |                        | 114.12   |

| Compounds and Final Concentrations (M)    | Average of % Viability | Hits (✓) |
|-------------------------------------------|------------------------|----------|
| <b>alpha-CYANO-3-HYDROXYCINNAMIC ACID</b> |                        |          |
| 10.0E-9                                   |                        | 140.79   |
| 100.0E-9                                  |                        | 132.74   |
| 1.0E-6                                    |                        | 110.32   |
| 10.0E-6                                   |                        | 125.58   |
| <b>alpha-CYANO-4-HYDROXYCINNAMIC ACID</b> |                        |          |
| 10.0E-9                                   |                        | 116.63   |
| 100.0E-9                                  |                        | 126.58   |
| 1.0E-6                                    |                        | 117.84   |
| 10.0E-6                                   |                        | 101.62   |
| <b>alpha-DIHYDROGEDUNOL</b>               |                        |          |
| 10.0E-9                                   |                        | 143.42   |
| 100.0E-9                                  |                        | 136.24   |
| 1.0E-6                                    |                        | 125.13   |
| 10.0E-6                                   |                        | 86.89    |
| <b>alpha-ERGOCRYPTINE</b>                 |                        |          |
| 10.0E-9                                   |                        | 96.08    |
| 100.0E-9                                  |                        | 88.21    |
| 1.0E-6                                    |                        | 90.12    |
| 10.0E-6                                   |                        | 87.56    |
| <b>alpha-HYDROXYDEOXYCHOLIC ACID</b>      |                        |          |
| 10.0E-9                                   |                        | 120.79   |
| 100.0E-9                                  |                        | 125.46   |
| 1.0E-6                                    |                        | 115.63   |
| 10.0E-6                                   |                        | 106.05   |
| <b>alpha-MANGOSTIN</b>                    |                        |          |
| 10.0E-9                                   |                        | 125.27   |
| 100.0E-9                                  |                        | 110.69   |
| 1.0E-6                                    |                        | 101.88   |
| 10.0E-6                                   |                        | 0.32     |
| <b>alpha-TOCHOPHEROL</b>                  |                        |          |
| 10.0E-9                                   |                        | 93.97    |
| 100.0E-9                                  |                        | 118.24   |
| 1.0E-6                                    |                        | 116.20   |
| 10.0E-6                                   |                        | 95.13    |
| <b>alpha-TOCHOPHERYL ACETATE</b>          |                        |          |
| 10.0E-9                                   |                        | 105.19   |
| 100.0E-9                                  |                        | 124.29   |
| 1.0E-6                                    |                        | 128.87   |
| 10.0E-6                                   |                        | 126.57   |
| <b>ALPINETIN METHYL ETHER</b>             |                        |          |
| 10.0E-9                                   |                        | 115.87   |
| 100.0E-9                                  |                        | 103.29   |
| 1.0E-6                                    |                        | 93.71    |
| 10.0E-6                                   |                        | 80.36    |
| <b>ALPRENOLOL</b>                         |                        |          |
| 10.0E-9                                   |                        | 116.99   |
| 100.0E-9                                  |                        | 104.65   |
| 1.0E-6                                    |                        | 101.77   |
| 10.0E-6                                   |                        | 95.48    |
| <b>ALRESTATIN</b>                         |                        |          |
| 10.0E-9                                   |                        | 111.57   |
| 100.0E-9                                  |                        | 109.58   |
| 1.0E-6                                    |                        | 106.27   |
| 10.0E-6                                   |                        | 2.90     |
| <b>ALTHIAZIDE</b>                         |                        |          |
| 10.0E-9                                   |                        | 123.39   |
| 100.0E-9                                  |                        | 103.70   |
| 1.0E-6                                    |                        | 102.99   |
| 10.0E-6                                   |                        | 110.57   |
| <b>ALTRENOGEST</b>                        |                        |          |
| 10.0E-9                                   |                        | 114.48   |
| 100.0E-9                                  |                        | 97.60    |
| 1.0E-6                                    |                        | 97.38    |
| 10.0E-6                                   |                        | 94.21    |
| <b>ALTRETAMINE</b>                        |                        |          |
| 10.0E-9                                   |                        | 126.02   |
| 100.0E-9                                  |                        | 117.89   |
| 1.0E-6                                    |                        | 122.44   |
| 10.0E-6                                   |                        | 120.50   |
| <b>ALVERINE CITRATE</b>                   |                        |          |
| 10.0E-9                                   |                        | 116.90   |
| 100.0E-9                                  |                        | 120.70   |
| 1.0E-6                                    |                        | 108.38   |
| 10.0E-6                                   |                        | 85.93    |
| <b>AMANTADINE HYDROCHLORIDE</b>           |                        |          |
| 10.0E-9                                   |                        | 96.56    |
| 100.0E-9                                  |                        | 121.56   |
| 1.0E-6                                    |                        | 112.43   |
| 10.0E-6                                   |                        | 106.37   |

| Compounds and Final Concentrations (M)    | Average of % Viability | Hits (✓) |
|-------------------------------------------|------------------------|----------|
| <b>AMBROXOL HYDROCHLORIDE</b>             |                        |          |
| 10.0E-9                                   |                        | 119.66   |
| 100.0E-9                                  |                        | 114.81   |
| 1.0E-6                                    |                        | 104.58   |
| 10.0E-6                                   |                        | 89.44    |
| <b>AMCINONIDE</b>                         |                        |          |
| 10.0E-9                                   |                        | 118.36   |
| 100.0E-9                                  |                        | 119.22   |
| 1.0E-6                                    |                        | 116.54   |
| 10.0E-6                                   |                        | 99.73    |
| <b>AMIFOSTINE</b>                         |                        |          |
| 10.0E-9                                   |                        | 123.65   |
| 100.0E-9                                  |                        | 116.71   |
| 1.0E-6                                    |                        | 103.64   |
| 10.0E-6                                   |                        | 106.82   |
| <b>AMIKACIN SULFATE</b>                   |                        |          |
| 10.0E-9                                   |                        | 110.73   |
| 100.0E-9                                  |                        | 121.00   |
| 1.0E-6                                    |                        | 125.98   |
| 10.0E-6                                   |                        | 106.73   |
| <b>AMILORIDE HYDROCHLORIDE</b>            |                        |          |
| 10.0E-9                                   |                        | 104.68   |
| 100.0E-9                                  |                        | 120.31   |
| 1.0E-6                                    |                        | 91.42    |
| 10.0E-6                                   |                        | 2.49     |
| <b>AMINACRINE</b>                         |                        |          |
| 10.0E-9                                   |                        | 119.16   |
| 100.0E-9                                  |                        | 103.02   |
| 1.0E-6                                    |                        | 98.02    |
| 10.0E-6                                   |                        | 3.71     |
| <b>AMINO BENZOTROPINE</b>                 |                        |          |
| 10.0E-9                                   |                        | 112.53   |
| 100.0E-9                                  |                        | 103.33   |
| 1.0E-6                                    |                        | 100.78   |
| 10.0E-6                                   |                        | 104.14   |
| <b>AMINOCAPROIC ACID</b>                  |                        |          |
| 10.0E-9                                   |                        | 111.15   |
| 100.0E-9                                  |                        | 128.31   |
| 1.0E-6                                    |                        | 118.48   |
| 10.0E-6                                   |                        | 79.21    |
| <b>AMINOCYCLOPROPANECARBOXYLIC ACID</b>   |                        |          |
| 10.0E-9                                   |                        | 142.17   |
| 100.0E-9                                  |                        | 138.01   |
| 1.0E-6                                    |                        | 109.64   |
| 10.0E-6                                   |                        | 119.36   |
| <b>AMINO GLUTETHIMIDE</b>                 |                        |          |
| 10.0E-9                                   |                        | 127.56   |
| 100.0E-9                                  |                        | 133.99   |
| 1.0E-6                                    |                        | 120.27   |
| 10.0E-6                                   |                        | 120.36   |
| <b>AMINO HIPPURIC ACID</b>                |                        |          |
| 10.0E-9                                   |                        | 121.69   |
| 100.0E-9                                  |                        | 114.33   |
| 1.0E-6                                    |                        | 108.59   |
| 10.0E-6                                   |                        | 121.04   |
| <b>AMINO LEVULINIC ACID HYDROCHLORIDE</b> |                        |          |
| 10.0E-9                                   |                        | 111.06   |
| 100.0E-9                                  |                        | 126.78   |
| 1.0E-6                                    |                        | 125.01   |
| 10.0E-6                                   |                        | 101.90   |
| <b>AMINO PENTAMIDE</b>                    |                        |          |
| 10.0E-9                                   |                        | 111.61   |
| 100.0E-9                                  |                        | 95.31    |
| 1.0E-6                                    |                        | 100.89   |
| 10.0E-6                                   |                        | 93.41    |
| <b>AMINO PTERTIN</b>                      |                        |          |
| 10.0E-9                                   |                        | 94.37    |
| 100.0E-9                                  |                        | 94.89    |
| 1.0E-6                                    |                        | 110.54   |
| 10.0E-6                                   |                        | 95.30    |
| <b>AMINO SALICYLATE SODIUM</b>            |                        |          |
| 10.0E-9                                   |                        | 105.99   |
| 100.0E-9                                  |                        | 109.00   |
| 1.0E-6                                    |                        | 110.64   |
| 10.0E-6                                   |                        | 97.31    |
| <b>AMINO THIAZOLE</b>                     |                        |          |
| 10.0E-9                                   |                        | 97.58    |
| 100.0E-9                                  |                        | 115.70   |
| 1.0E-6                                    |                        | 108.72   |
| 10.0E-6                                   |                        | 106.96   |



| Compounds and Final Concentrations (M) | Average of % Viability | Hits (✓) |
|----------------------------------------|------------------------|----------|
| <b>AMIODARONE HYDROCHLORIDE</b>        |                        |          |
| 10.0E-9                                |                        | 124.31   |
| 100.0E-9                               |                        | 117.17   |
| 1.0E-6                                 |                        | 110.88   |
| 10.0E-6                                |                        | 1.46     |
| <b>AMIPRILOSE</b>                      |                        |          |
| 10.0E-9                                |                        | 90.92    |
| 100.0E-9                               |                        | 92.88    |
| 1.0E-6                                 |                        | 83.59    |
| 10.0E-6                                |                        | 86.90    |
| <b>AMITRAZ</b>                         |                        |          |
| 10.0E-9                                |                        | 128.26   |
| 100.0E-9                               |                        | 124.81   |
| 1.0E-6                                 |                        | 112.11   |
| 10.0E-6                                |                        | 96.54    |
| <b>AMITRIPTYLINE HYDROCHLORIDE</b>     |                        |          |
| 10.0E-9                                |                        | 112.26   |
| 100.0E-9                               |                        | 103.03   |
| 1.0E-6                                 |                        | 108.46   |
| 10.0E-6                                |                        | 108.51   |
| <b>AMLODIPINE BESYLATE</b>             |                        |          |
| 10.0E-9                                |                        | 109.01   |
| 100.0E-9                               |                        | 98.90    |
| 1.0E-6                                 |                        | 112.77   |
| 10.0E-6                                |                        | 118.39   |
| <b>AMODIAQUINE DIHYDROCHLORIDE</b>     |                        |          |
| 10.0E-9                                |                        | 92.86    |
| 100.0E-9                               |                        | 108.93   |
| 1.0E-6                                 |                        | 112.17   |
| 10.0E-6                                |                        | 50.84    |
| <b>AMOXAPINE</b>                       |                        |          |
| 10.0E-9                                |                        | 124.13   |
| 100.0E-9                               |                        | 106.12   |
| 1.0E-6                                 |                        | 113.38   |
| 10.0E-6                                |                        | 86.15    |
| <b>AMOXICILLIN</b>                     |                        |          |
| 10.0E-9                                |                        | 108.59   |
| 100.0E-9                               |                        | 107.82   |
| 1.0E-6                                 |                        | 113.84   |
| 10.0E-6                                |                        | 92.63    |
| <b>AMPHOTERICIN B</b>                  |                        |          |
| 10.0E-9                                |                        | 111.41   |
| 100.0E-9                               |                        | 118.19   |
| 1.0E-6                                 |                        | 103.97   |
| 10.0E-6                                |                        | 103.75   |
| <b>AMPICILLIN SODIUM</b>               |                        |          |
| 10.0E-9                                |                        | 108.96   |
| 100.0E-9                               |                        | 116.30   |
| 1.0E-6                                 |                        | 116.41   |
| 10.0E-6                                |                        | 111.58   |
| <b>AMPROLIUM</b>                       |                        |          |
| 10.0E-9                                |                        | 114.43   |
| 100.0E-9                               |                        | 118.17   |
| 1.0E-6                                 |                        | 130.34   |
| 10.0E-6                                |                        | 113.88   |
| <b>AMPYRONE</b>                        |                        |          |
| 10.0E-9                                |                        | 120.35   |
| 100.0E-9                               |                        | 117.63   |
| 1.0E-6                                 |                        | 131.62   |
| 10.0E-6                                |                        | 123.20   |
| <b>AMPYZINE SULFATE</b>                |                        |          |
| 10.0E-9                                |                        | 121.84   |
| 100.0E-9                               |                        | 107.91   |
| 1.0E-6                                 |                        | 106.98   |
| 10.0E-6                                |                        | 103.69   |
| <b>AMRINONE</b>                        |                        |          |
| 10.0E-9                                |                        | 127.06   |
| 100.0E-9                               |                        | 107.36   |
| 1.0E-6                                 |                        | 100.37   |
| 10.0E-6                                |                        | 110.04   |
| <b>AMSACRINE</b>                       |                        |          |
| 10.0E-9                                |                        | 74.41    |
| 100.0E-9                               |                        | 3.01     |
| 1.0E-6                                 |                        | 1.59     |
| 10.0E-6                                |                        | 1.10     |
| <b>AMYGDALIN</b>                       |                        |          |
| 10.0E-9                                |                        | 118.71   |
| 100.0E-9                               |                        | 123.20   |
| 1.0E-6                                 |                        | 113.00   |
| 10.0E-6                                |                        | 114.61   |

| Compounds and Final Concentrations (M) | Average of % Viability | Hits (✓) |
|----------------------------------------|------------------------|----------|
| <b>ANABASAMINE HYDROCHLORIDE</b>       |                        |          |
| 10.0E-9                                |                        | 88.58    |
| 100.0E-9                               |                        | 89.86    |
| 1.0E-6                                 |                        | 111.51   |
| 10.0E-6                                |                        | 95.99    |
| <b>ANABASINE HYDROCHLORIDE</b>         |                        |          |
| 10.0E-9                                |                        | 121.82   |
| 100.0E-9                               |                        | 133.57   |
| 1.0E-6                                 |                        | 113.93   |
| 10.0E-6                                |                        | 117.56   |
| <b>ANAGRELIDE HYDROCHLORIDE</b>        |                        |          |
| 10.0E-9                                |                        | 121.32   |
| 100.0E-9                               |                        | 108.08   |
| 1.0E-6                                 |                        | 78.17    |
| 10.0E-6                                |                        | 70.21    |
| <b>ANCITABINE HYDROCHLORIDE</b>        |                        |          |
| 10.0E-9                                |                        | 4.40     |
| 100.0E-9                               |                        | 3.61     |
| 1.0E-6                                 |                        | 3.11     |
| 10.0E-6                                |                        | 1.79     |
| <b>ANDROSTA-1,4-DIEN-3,17-DIONE</b>    |                        |          |
| 10.0E-9                                |                        | 116.84   |
| 100.0E-9                               |                        | 122.07   |
| 1.0E-6                                 |                        | 122.40   |
| 10.0E-6                                |                        | 108.45   |
| <b>ANDROSTERONE</b>                    |                        |          |
| 10.0E-9                                |                        | 98.15    |
| 100.0E-9                               |                        | 89.59    |
| 1.0E-6                                 |                        | 76.31    |
| 10.0E-6                                |                        | 55.82    |
| <b>ANDROSTERONE ACETATE</b>            |                        |          |
| 10.0E-9                                |                        | 124.35   |
| 100.0E-9                               |                        | 134.12   |
| 1.0E-6                                 |                        | 107.33   |
| 10.0E-6                                |                        | 105.04   |
| <b>ANETHOLE</b>                        |                        |          |
| 10.0E-9                                |                        | 38.19    |
| 100.0E-9                               |                        | 109.64   |
| 1.0E-6                                 |                        | 93.88    |
| 10.0E-6                                |                        | 106.49   |
| <b>ANGOLENSIN (R)</b>                  |                        |          |
| 10.0E-9                                |                        | 93.36    |
| 100.0E-9                               |                        | 93.14    |
| 1.0E-6                                 |                        | 94.50    |
| 10.0E-6                                |                        | 84.69    |
| <b>ANHIDROBRAZILIC ACID</b>            |                        |          |
| 10.0E-9                                |                        | 119.35   |
| 100.0E-9                               |                        | 141.33   |
| 1.0E-6                                 |                        | 121.55   |
| 10.0E-6                                |                        | 128.18   |
| <b>ANIRACETAM</b>                      |                        |          |
| 10.0E-9                                |                        | 115.00   |
| 100.0E-9                               |                        | 107.20   |
| 1.0E-6                                 |                        | 99.30    |
| 10.0E-6                                |                        | 94.28    |
| <b>ANISODAMINE HYDROBROMIDE</b>        |                        |          |
| 10.0E-9                                |                        | 106.58   |
| 100.0E-9                               |                        | 111.87   |
| 1.0E-6                                 |                        | 101.44   |
| 10.0E-6                                |                        | 98.42    |
| <b>ANISOMYCIN</b>                      |                        |          |
| 10.0E-9                                |                        | 91.05    |
| 100.0E-9                               |                        | 46.46    |
| 1.0E-6                                 |                        | 0.20     |
| 10.0E-6                                |                        | 0.11     |
| <b>ANTAZOLINE PHOSPHATE</b>            |                        |          |
| 10.0E-9                                |                        | 101.89   |
| 100.0E-9                               |                        | 113.10   |
| 1.0E-6                                 |                        | 116.71   |
| 10.0E-6                                |                        | 93.17    |
| <b>ANTHOTHECOL</b>                     |                        |          |
| 10.0E-9                                |                        | 120.49   |
| 100.0E-9                               |                        | 134.40   |
| 1.0E-6                                 |                        | 1.49     |
| 10.0E-6                                |                        | -0.03    |
| <b>ANTHRALIN</b>                       |                        |          |
| 10.0E-9                                |                        | 122.87   |
| 100.0E-9                               |                        | 126.95   |
| 1.0E-6                                 |                        | 116.44   |
| 10.0E-6                                |                        | 100.07   |

| Compounds and Final Concentrations (M) | Average of % Viability | Hits (✓) |
|----------------------------------------|------------------------|----------|
| <b>ANTHRAQUINONE</b>                   |                        |          |
| 10.0E-9                                |                        | 112.14   |
| 100.0E-9                               |                        | 119.80   |
| 1.0E-6                                 |                        | 106.49   |
| 10.0E-6                                |                        | 109.61   |
| <b>ANTIAROL</b>                        |                        |          |
| 10.0E-9                                |                        | 125.54   |
| 100.0E-9                               |                        | 116.71   |
| 1.0E-6                                 |                        | 91.19    |
| 10.0E-6                                |                        | 30.32    |
| <b>ANTIMYCIN A (A1 shown)</b>          |                        |          |
| 10.0E-9                                |                        | 102.51   |
| 100.0E-9                               |                        | 62.63    |
| 1.0E-6                                 |                        | 3.62     |
| 10.0E-6                                |                        | 2.48     |
| <b>ANTIPYRINE</b>                      |                        |          |
| 10.0E-9                                |                        | 113.53   |
| 100.0E-9                               |                        | 117.23   |
| 1.0E-6                                 |                        | 113.95   |
| 10.0E-6                                |                        | 106.51   |
| <b>APHYLIC ACID</b>                    |                        |          |
| 10.0E-9                                |                        | 104.47   |
| 100.0E-9                               |                        | 105.04   |
| 1.0E-6                                 |                        | 108.68   |
| 10.0E-6                                |                        | 104.17   |
| <b>APIGENIN</b>                        |                        |          |
| 10.0E-9                                |                        | 126.66   |
| 100.0E-9                               |                        | 157.01   |
| 1.0E-6                                 |                        | 115.25   |
| 10.0E-6                                |                        | 111.54   |
| <b>APIGENIN DIMETHYL ETHER</b>         |                        |          |
| 10.0E-9                                |                        | 112.26   |
| 100.0E-9                               |                        | 120.06   |
| 1.0E-6                                 |                        | 114.32   |
| 10.0E-6                                |                        | 98.80    |
| <b>APIIN</b>                           |                        |          |
| 10.0E-9                                |                        | 131.85   |
| 100.0E-9                               |                        | 144.25   |
| 1.0E-6                                 |                        | 117.79   |
| 10.0E-6                                |                        | 123.47   |
| <b>APIOLE</b>                          |                        |          |
| 10.0E-9                                |                        | 108.19   |
| 100.0E-9                               |                        | 118.75   |
| 1.0E-6                                 |                        | 109.83   |
| 10.0E-6                                |                        | 84.77    |
| <b>APOMORPHINE HYDROCHLORIDE</b>       |                        |          |
| 10.0E-9                                |                        | 118.72   |
| 100.0E-9                               |                        | 119.10   |
| 1.0E-6                                 |                        | 115.68   |
| 10.0E-6                                |                        | 55.91    |
| <b>APOTOXICAROL</b>                    |                        |          |
| 10.0E-9                                |                        | 121.05   |
| 100.0E-9                               |                        | 141.72   |
| 1.0E-6                                 |                        | 111.44   |
| 10.0E-6                                |                        | 120.57   |
| <b>APRAMYCIN</b>                       |                        |          |
| 10.0E-9                                |                        | 117.15   |
| 100.0E-9                               |                        | 106.62   |
| 1.0E-6                                 |                        | 106.73   |
| 10.0E-6                                |                        | 102.17   |
| <b>ARABITOL(D)</b>                     |                        |          |
| 10.0E-9                                |                        | 118.96   |
| 100.0E-9                               |                        | 138.77   |
| 1.0E-6                                 |                        | 115.98   |
| 10.0E-6                                |                        | 109.81   |
| <b>ARBUTIN</b>                         |                        |          |
| 10.0E-9                                |                        | 112.39   |
| 100.0E-9                               |                        | 118.23   |
| 1.0E-6                                 |                        | 102.54   |
| 10.0E-6                                |                        | 91.72    |
| <b>ARCAINE SULFATE</b>                 |                        |          |
| 10.0E-9                                |                        | 112.95   |
| 100.0E-9                               |                        | 128.34   |
| 1.0E-6                                 |                        | 102.63   |
| 10.0E-6                                |                        | 100.04   |
| <b>ARGININE HYDROCHLORIDE</b>          |                        |          |
| 10.0E-9                                |                        | 110.87   |
| 100.0E-9                               |                        | 98.99    |
| 1.0E-6                                 |                        | 97.99    |
| 10.0E-6                                |                        | 93.60    |

| Compounds and Final Concentrations (M) | Average of % Viability | Hits (✓) |
|----------------------------------------|------------------------|----------|
| <b>ARIPIPRAZOLE</b>                    |                        |          |
| 10.0E-9                                |                        | 115.28   |
| 100.0E-9                               |                        | 117.92   |
| 1.0E-6                                 |                        | 119.59   |
| 10.0E-6                                |                        | 79.28    |
| <b>ARMODAFINIL</b>                     |                        |          |
| 10.0E-9                                |                        | 107.42   |
| 100.0E-9                               |                        | 93.77    |
| 1.0E-6                                 |                        | 112.43   |
| 10.0E-6                                |                        | 91.25    |
| <b>ARSANILIC ACID</b>                  |                        |          |
| 10.0E-9                                |                        | 123.07   |
| 100.0E-9                               |                        | 115.29   |
| 1.0E-6                                 |                        | 107.06   |
| 10.0E-6                                |                        | 103.45   |
| <b>ARSENIC TRIOXIDE</b>                |                        |          |
| 10.0E-9                                |                        | 117.43   |
| 100.0E-9                               |                        | 107.78   |
| 1.0E-6                                 |                        | 96.67    |
| 10.0E-6                                |                        | 60.95    |
| <b>ARTEMISIN</b>                       |                        |          |
| 10.0E-9                                |                        | 116.92   |
| 100.0E-9                               |                        | 104.46   |
| 1.0E-6                                 |                        | 105.45   |
| 10.0E-6                                |                        | 97.24    |
| <b>ARTEMISININ</b>                     |                        |          |
| 10.0E-9                                |                        | 111.43   |
| 100.0E-9                               |                        | 85.04    |
| 1.0E-6                                 |                        | 85.21    |
| 10.0E-6                                |                        | 52.31    |
| <b>ARTENIMOL</b>                       |                        |          |
| 10.0E-9                                |                        | 100.86   |
| 100.0E-9                               |                        | 115.74   |
| 1.0E-6                                 |                        | 119.97   |
| 10.0E-6                                |                        | 103.69   |
| <b>ARTHONIOIC ACID</b>                 |                        |          |
| 10.0E-9                                |                        | 122.31   |
| 100.0E-9                               |                        | 119.69   |
| 1.0E-6                                 |                        | 107.47   |
| 10.0E-6                                |                        | 82.39    |
| <b>ASARININ (-)</b>                    |                        |          |
| 10.0E-9                                |                        | 104.97   |
| 100.0E-9                               |                        | 114.69   |
| 1.0E-6                                 |                        | 114.01   |
| 10.0E-6                                |                        | 102.30   |
| <b>ASARYLALDEHYDE</b>                  |                        |          |
| 10.0E-9                                |                        | 111.15   |
| 100.0E-9                               |                        | 118.05   |
| 1.0E-6                                 |                        | 100.09   |
| 10.0E-6                                |                        | 81.44    |
| <b>ASCORBIC ACID</b>                   |                        |          |
| 10.0E-9                                |                        | 122.09   |
| 100.0E-9                               |                        | 101.26   |
| 1.0E-6                                 |                        | 122.09   |
| 10.0E-6                                |                        | 108.33   |
| <b>ASCORBYL PALMITATE</b>              |                        |          |
| 10.0E-9                                |                        | 85.41    |
| 100.0E-9                               |                        | 93.40    |
| 1.0E-6                                 |                        | 97.02    |
| 10.0E-6                                |                        | 51.97    |
| <b>ASIATIC ACID</b>                    |                        |          |
| 10.0E-9                                |                        | 117.50   |
| 100.0E-9                               |                        | 122.98   |
| 1.0E-6                                 |                        | 120.57   |
| 10.0E-6                                |                        | 106.07   |
| <b>ASPARTAME</b>                       |                        |          |
| 10.0E-9                                |                        | 109.14   |
| 100.0E-9                               |                        | 101.21   |
| 1.0E-6                                 |                        | 106.99   |
| 10.0E-6                                |                        | 102.31   |
| <b>ASPIRIN</b>                         |                        |          |
| 10.0E-9                                |                        | 98.60    |
| 100.0E-9                               |                        | 104.63   |
| 1.0E-6                                 |                        | 102.08   |
| 10.0E-6                                |                        | 113.38   |
| <b>ASTAXANTHIN</b>                     |                        |          |
| 10.0E-9                                |                        | 137.51   |
| 100.0E-9                               |                        | 122.51   |
| 1.0E-6                                 |                        | 100.97   |
| 10.0E-6                                |                        | 114.10   |

| Compounds and Final Concentrations (M) | Average of % Viability | Hits (✓) |
|----------------------------------------|------------------------|----------|
| <b>ASTEMIZOLE</b>                      |                        |          |
| 10.0E-9                                |                        | 120.67   |
| 100.0E-9                               |                        | 112.34   |
| 1.0E-6                                 |                        | 103.09   |
| 10.0E-6                                |                        | 78.42    |
| <b>ASTRAGALOSIDE IV</b>                |                        |          |
| 10.0E-9                                |                        | 96.16    |
| 100.0E-9                               |                        | 106.09   |
| 1.0E-6                                 |                        | 122.26   |
| 10.0E-6                                |                        | 117.22   |
| <b>ATENOLOL</b>                        |                        |          |
| 10.0E-9                                |                        | 93.09    |
| 100.0E-9                               |                        | 96.37    |
| 1.0E-6                                 |                        | 90.25    |
| 10.0E-6                                |                        | 97.81    |
| <b>ATOMOXETINE HYDROCHLORIDE</b>       |                        |          |
| 10.0E-9                                |                        | 105.10   |
| 100.0E-9                               |                        | 110.58   |
| 1.0E-6                                 |                        | 103.17   |
| 10.0E-6                                |                        | 99.38    |
| <b>ATORVASTATIN CALCIUM</b>            |                        |          |
| 10.0E-9                                |                        | 119.28   |
| 100.0E-9                               |                        | 112.72   |
| 1.0E-6                                 |                        | 109.70   |
| 10.0E-6                                |                        | 69.00    |
| <b>ATOVAQUONE</b>                      |                        |          |
| 10.0E-9                                |                        | 100.35   |
| 100.0E-9                               |                        | 120.24   |
| 1.0E-6                                 |                        | 108.28   |
| 10.0E-6                                |                        | 120.49   |
| <b>ATRANORIN</b>                       |                        |          |
| 10.0E-9                                |                        | 108.11   |
| 100.0E-9                               |                        | 116.04   |
| 1.0E-6                                 |                        | 114.76   |
| 10.0E-6                                |                        | 112.64   |
| <b>ATROPINE OXIDE</b>                  |                        |          |
| 10.0E-9                                |                        | 112.74   |
| 100.0E-9                               |                        | 119.99   |
| 1.0E-6                                 |                        | 126.62   |
| 10.0E-6                                |                        | 102.38   |
| <b>ATROPINE SULFATE</b>                |                        |          |
| 10.0E-9                                |                        | 88.44    |
| 100.0E-9                               |                        | 99.10    |
| 1.0E-6                                 |                        | 97.91    |
| 10.0E-6                                |                        | 87.39    |
| <b>AURAPTENE</b>                       |                        |          |
| 10.0E-9                                |                        | 120.17   |
| 100.0E-9                               |                        | 102.04   |
| 1.0E-6                                 |                        | 115.52   |
| 10.0E-6                                |                        | 114.37   |
| <b>AURIN TRICARBOXYLIC ACID</b>        |                        |          |
| 10.0E-9                                |                        | 104.21   |
| 100.0E-9                               |                        | 116.98   |
| 1.0E-6                                 |                        | 146.48   |
| 10.0E-6                                |                        | 112.39   |
| <b>AVOBENZONE</b>                      |                        |          |
| 10.0E-9                                |                        | 98.60    |
| 100.0E-9                               |                        | 111.73   |
| 1.0E-6                                 |                        | 110.95   |
| 10.0E-6                                |                        | 127.41   |
| <b>AVOCADANOFURAN</b>                  |                        |          |
| 10.0E-9                                |                        | 115.79   |
| 100.0E-9                               |                        | 109.94   |
| 1.0E-6                                 |                        | 105.71   |
| 10.0E-6                                |                        | 111.45   |
| <b>AVOCADENOFURAN</b>                  |                        |          |
| 10.0E-9                                |                        | 107.82   |
| 100.0E-9                               |                        | 114.78   |
| 1.0E-6                                 |                        | 116.98   |
| 10.0E-6                                |                        | 108.22   |
| <b>AVOCADYNE ACETATE</b>               |                        |          |
| 10.0E-9                                |                        | 106.90   |
| 100.0E-9                               |                        | 120.61   |
| 1.0E-6                                 |                        | 108.91   |
| 10.0E-6                                |                        | 100.33   |
| <b>AVOCATIN A</b>                      |                        |          |
| 10.0E-9                                |                        | 129.90   |
| 100.0E-9                               |                        | 117.79   |
| 1.0E-6                                 |                        | 118.67   |
| 10.0E-6                                |                        | 90.77    |

| Compounds and Final Concentrations (M) | Average of % Viability | Hits (✓) |
|----------------------------------------|------------------------|----------|
| <b>AVOCATIN B</b>                      |                        |          |
| 10.0E-9                                |                        | 139.93   |
| 100.0E-9                               |                        | 140.84   |
| 1.0E-6                                 |                        | 117.26   |
| 10.0E-6                                |                        | 107.19   |
| <b>AZACITIDINE</b>                     |                        |          |
| 10.0E-9                                |                        | 119.77   |
| 100.0E-9                               |                        | 8.56     |
| 1.0E-6                                 |                        | 1.91     |
| 10.0E-6                                |                        | 1.95     |
| <b>AZADIRACHTIN</b>                    |                        |          |
| 10.0E-9                                |                        | 109.98   |
| 100.0E-9                               |                        | 111.40   |
| 1.0E-6                                 |                        | 116.68   |
| 10.0E-6                                |                        | 110.97   |
| <b>AZAPERONE</b>                       |                        |          |
| 10.0E-9                                |                        | 113.32   |
| 100.0E-9                               |                        | 102.78   |
| 1.0E-6                                 |                        | 109.08   |
| 10.0E-6                                |                        | 87.82    |
| <b>AZASERINE</b>                       |                        |          |
| 10.0E-9                                |                        | 113.57   |
| 100.0E-9                               |                        | 119.03   |
| 1.0E-6                                 |                        | 107.14   |
| 10.0E-6                                |                        | 113.79   |
| <b>AZATHIOPRINE</b>                    |                        |          |
| 10.0E-9                                |                        | 113.08   |
| 100.0E-9                               |                        | 111.50   |
| 1.0E-6                                 |                        | 86.45    |
| 10.0E-6                                |                        | 83.27    |
| <b>AZELAIC ACID</b>                    |                        |          |
| 10.0E-9                                |                        | 123.15   |
| 100.0E-9                               |                        | 80.49    |
| 1.0E-6                                 |                        | 100.40   |
| 10.0E-6                                |                        | 107.27   |
| <b>AZELASTINE HYDROCHLORIDE</b>        |                        |          |
| 10.0E-9                                |                        | 118.56   |
| 100.0E-9                               |                        | 103.84   |
| 1.0E-6                                 |                        | 97.59    |
| 10.0E-6                                |                        | 77.85    |
| <b>AZITHROMYCIN</b>                    |                        |          |
| 10.0E-9                                |                        | 121.26   |
| 100.0E-9                               |                        | 110.13   |
| 1.0E-6                                 |                        | 113.21   |
| 10.0E-6                                |                        | 105.80   |
| <b>AZLOCILLIN SODIUM</b>               |                        |          |
| 10.0E-9                                |                        | 116.37   |
| 100.0E-9                               |                        | 102.34   |
| 1.0E-6                                 |                        | 124.21   |
| 10.0E-6                                |                        | 112.33   |
| <b>AZOBEZENE</b>                       |                        |          |
| 10.0E-9                                |                        | 124.74   |
| 100.0E-9                               |                        | 115.59   |
| 1.0E-6                                 |                        | 111.32   |
| 10.0E-6                                |                        | 102.14   |
| <b>AZTREONAM</b>                       |                        |          |
| 10.0E-9                                |                        | 89.05    |
| 100.0E-9                               |                        | 89.01    |
| 1.0E-6                                 |                        | 92.12    |
| 10.0E-6                                |                        | 96.86    |
| <b>BACAMPICILLIN HYDROCHLORIDE</b>     |                        |          |
| 10.0E-9                                |                        | 111.39   |
| 100.0E-9                               |                        | 102.66   |
| 1.0E-6                                 |                        | 105.72   |
| 10.0E-6                                |                        | 110.53   |
| <b>BACCATIN III</b>                    |                        |          |
| 10.0E-9                                |                        | 116.38   |
| 100.0E-9                               |                        | 118.15   |
| 1.0E-6                                 |                        | 101.69   |
| 10.0E-6                                |                        | 89.72    |
| <b>BACITRACIN</b>                      |                        |          |
| 10.0E-9                                |                        | 108.05   |
| 100.0E-9                               |                        | 112.49   |
| 1.0E-6                                 |                        | 95.90    |
| 10.0E-6                                |                        | 107.96   |
| <b>BACLOFEN</b>                        |                        |          |
| 10.0E-9                                |                        | 110.79   |
| 100.0E-9                               |                        | 117.36   |
| 1.0E-6                                 |                        | 105.65   |
| 10.0E-6                                |                        | 118.73   |

| Compounds and Final Concentrations (M) | Average of % Viability | Hits (✓) |
|----------------------------------------|------------------------|----------|
| <b>BAICALEIN</b>                       |                        |          |
| 10.0E-9                                |                        | 115.25   |
| 100.0E-9                               |                        | 126.79   |
| 1.0E-6                                 |                        | 106.87   |
| 10.0E-6                                |                        | 29.21    |
| <b>BAMBUTEROL HYDROCHLORIDE</b>        |                        |          |
| 10.0E-9                                |                        | 115.54   |
| 100.0E-9                               |                        | 109.35   |
| 1.0E-6                                 |                        | 112.78   |
| 10.0E-6                                |                        | 102.53   |
| <b>BARBITAL</b>                        |                        |          |
| 10.0E-9                                |                        | 119.09   |
| 100.0E-9                               |                        | 114.23   |
| 1.0E-6                                 |                        | 111.39   |
| 10.0E-6                                |                        | 84.25    |
| <b>BATYL ALCOHOL</b>                   |                        |          |
| 10.0E-9                                |                        | 118.00   |
| 100.0E-9                               |                        | 119.22   |
| 1.0E-6                                 |                        | 109.00   |
| 10.0E-6                                |                        | 111.29   |
| <b>BECLAMIDE</b>                       |                        |          |
| 10.0E-9                                |                        | 129.97   |
| 100.0E-9                               |                        | 116.32   |
| 1.0E-6                                 |                        | 109.79   |
| 10.0E-6                                |                        | 112.78   |
| <b>BECLOMETHASONE DIPROPIONATE</b>     |                        |          |
| 10.0E-9                                |                        | 118.73   |
| 100.0E-9                               |                        | 125.70   |
| 1.0E-6                                 |                        | 113.92   |
| 10.0E-6                                |                        | 102.91   |
| <b>BEKANAMYCIN SULFATE</b>             |                        |          |
| 10.0E-9                                |                        | 133.82   |
| 100.0E-9                               |                        | 84.86    |
| 1.0E-6                                 |                        | 115.37   |
| 10.0E-6                                |                        | 113.51   |
| <b>BENZAEPRILOL HYDROCHLORIDE</b>      |                        |          |
| 10.0E-9                                |                        | 100.73   |
| 100.0E-9                               |                        | 110.08   |
| 1.0E-6                                 |                        | 96.24    |
| 10.0E-6                                |                        | 102.37   |
| <b>BENDROFLUMETHIAZIDE</b>             |                        |          |
| 10.0E-9                                |                        | 111.17   |
| 100.0E-9                               |                        | 113.36   |
| 1.0E-6                                 |                        | 105.80   |
| 10.0E-6                                |                        | 44.62    |
| <b>BENFLUOREX HYDROCHLORIDE</b>        |                        |          |
| 10.0E-9                                |                        | 131.84   |
| 100.0E-9                               |                        | 116.16   |
| 1.0E-6                                 |                        | 112.53   |
| 10.0E-6                                |                        | 113.79   |
| <b>BENFOTIAMINE</b>                    |                        |          |
| 10.0E-9                                |                        | 103.71   |
| 100.0E-9                               |                        | 97.33    |
| 1.0E-6                                 |                        | 101.73   |
| 10.0E-6                                |                        | 97.40    |
| <b>BENSERAZIDE HYDROCHLORIDE</b>       |                        |          |
| 10.0E-9                                |                        | 113.53   |
| 100.0E-9                               |                        | 112.58   |
| 1.0E-6                                 |                        | 111.98   |
| 10.0E-6                                |                        | 91.23    |
| <b>BENURESTAT</b>                      |                        |          |
| 10.0E-9                                |                        | 81.04    |
| 100.0E-9                               |                        | 91.67    |
| 1.0E-6                                 |                        | 80.81    |
| 10.0E-6                                |                        | 80.85    |
| <b>BENZALKONIUM CHLORIDE</b>           |                        |          |
| 10.0E-9                                |                        | 119.36   |
| 100.0E-9                               |                        | 119.97   |
| 1.0E-6                                 |                        | 52.34    |
| 10.0E-6                                |                        | 7.12     |
| <b>BENZBROMARONE</b>                   |                        |          |
| 10.0E-9                                |                        | 115.41   |
| 100.0E-9                               |                        | 113.07   |
| 1.0E-6                                 |                        | 114.86   |
| 10.0E-6                                |                        | 114.24   |
| <b>BENZETHONIUM CHLORIDE</b>           |                        |          |
| 10.0E-9                                |                        | 121.48   |
| 100.0E-9                               |                        | 125.26   |
| 1.0E-6                                 |                        | 113.01   |
| 10.0E-6                                |                        | 3.40     |

| Compounds and Final Concentrations (M) | Average of % Viability | Hits (✓) |
|----------------------------------------|------------------------|----------|
| <b>BENZOCAINE</b>                      |                        |          |
| 10.0E-9                                |                        | 110.32   |
| 100.0E-9                               |                        | 126.37   |
| 1.0E-6                                 |                        | 119.68   |
| 10.0E-6                                |                        | 102.58   |
| <b>BENZOIC ACID</b>                    |                        |          |
| 10.0E-9                                |                        | 120.40   |
| 100.0E-9                               |                        | 98.42    |
| 1.0E-6                                 |                        | 112.56   |
| 10.0E-6                                |                        | 119.01   |
| <b>BENZOIQUINE</b>                     |                        |          |
| 10.0E-9                                |                        | 90.47    |
| 100.0E-9                               |                        | 75.99    |
| 1.0E-6                                 |                        | 91.32    |
| 10.0E-6                                |                        | 79.50    |
| <b>BENZOYL PEROXIDE</b>                |                        |          |
| 10.0E-9                                |                        | 123.30   |
| 100.0E-9                               |                        | 97.96    |
| 1.0E-6                                 |                        | 110.99   |
| 10.0E-6                                |                        | 106.92   |
| <b>BENZOYLPAS</b>                      |                        |          |
| 10.0E-9                                |                        | 105.04   |
| 100.0E-9                               |                        | 113.43   |
| 1.0E-6                                 |                        | 108.08   |
| 10.0E-6                                |                        | 104.89   |
| <b>BENZTHIAZIDE</b>                    |                        |          |
| 10.0E-9                                |                        | 107.75   |
| 100.0E-9                               |                        | 94.77    |
| 1.0E-6                                 |                        | 121.31   |
| 10.0E-6                                |                        | 101.88   |
| <b>BENZYDAMINE HYDROCHLORIDE</b>       |                        |          |
| 10.0E-9                                |                        | 121.44   |
| 100.0E-9                               |                        | 130.42   |
| 1.0E-6                                 |                        | 121.22   |
| 10.0E-6                                |                        | 94.60    |
| <b>BENZYL BENZOATE</b>                 |                        |          |
| 10.0E-9                                |                        | 118.69   |
| 100.0E-9                               |                        | 92.05    |
| 1.0E-6                                 |                        | 108.68   |
| 10.0E-6                                |                        | 104.92   |
| <b>BENZYL ISOTHIOCYANATE</b>           |                        |          |
| 10.0E-9                                |                        | 101.41   |
| 100.0E-9                               |                        | 99.97    |
| 1.0E-6                                 |                        | 97.02    |
| 10.0E-6                                |                        | 68.81    |
| <b>BEPHENIUM HYDROXYNAPHTHOATE</b>     |                        |          |
| 10.0E-9                                |                        | 95.90    |
| 100.0E-9                               |                        | 102.79   |
| 1.0E-6                                 |                        | 114.67   |
| 10.0E-6                                |                        | 89.36    |
| <b>BEPRIDIL HYDROCHLORIDE</b>          |                        |          |
| 10.0E-9                                |                        | 124.06   |
| 100.0E-9                               |                        | 125.45   |
| 1.0E-6                                 |                        | 114.54   |
| 10.0E-6                                |                        | 112.43   |
| <b>BERBAMINE HYDROCHLORIDE</b>         |                        |          |
| 10.0E-9                                |                        | 112.87   |
| 100.0E-9                               |                        | 111.38   |
| 1.0E-6                                 |                        | 88.37    |
| 10.0E-6                                |                        | 71.23    |
| <b>BERBERINE CHLORIDE</b>              |                        |          |
| 10.0E-9                                |                        | 93.85    |
| 100.0E-9                               |                        | 113.50   |
| 1.0E-6                                 |                        | 52.17    |
| 10.0E-6                                |                        | 3.36     |
| <b>BERGENIN</b>                        |                        |          |
| 10.0E-9                                |                        | 118.03   |
| 100.0E-9                               |                        | 141.25   |
| 1.0E-6                                 |                        | 116.28   |
| 10.0E-6                                |                        | 115.46   |
| <b>beta-AMYRIN</b>                     |                        |          |
| 10.0E-9                                |                        | 122.18   |
| 100.0E-9                               |                        | 125.81   |
| 1.0E-6                                 |                        | 117.92   |
| 10.0E-6                                |                        | 131.33   |
| <b>beta-AMYRIN ACETATE</b>             |                        |          |
| 10.0E-9                                |                        | 104.28   |
| 100.0E-9                               |                        | 102.97   |
| 1.0E-6                                 |                        | 104.49   |
| 10.0E-6                                |                        | 105.09   |



| Compounds and Final Concentrations (M)  | Average of % Viability | Hits (✓) |
|-----------------------------------------|------------------------|----------|
| <b>beta-CAROTENE</b>                    |                        |          |
| 10.0E-9                                 |                        | 101.08   |
| 100.0E-9                                |                        | 97.38    |
| 1.0E-6                                  |                        | 96.40    |
| 10.0E-6                                 |                        | 88.17    |
| <b>beta-CARYOPHYLLENE ALCOHOL</b>       |                        |          |
| 10.0E-9                                 |                        | 124.78   |
| 100.0E-9                                |                        | 121.82   |
| 1.0E-6                                  |                        | 120.44   |
| 10.0E-6                                 |                        | 126.83   |
| <b>beta-ESCIN</b>                       |                        |          |
| 10.0E-9                                 |                        | 128.34   |
| 100.0E-9                                |                        | 133.65   |
| 1.0E-6                                  |                        | 116.30   |
| 10.0E-6                                 |                        | 117.09   |
| <b>BETAHISTINE HYDROCHLORIDE</b>        |                        |          |
| 10.0E-9                                 |                        | 125.17   |
| 100.0E-9                                |                        | 118.98   |
| 1.0E-6                                  |                        | 100.21   |
| 10.0E-6                                 |                        | 107.90   |
| <b>BETAINE HYDROCHLORIDE</b>            |                        |          |
| 10.0E-9                                 |                        | 101.18   |
| 100.0E-9                                |                        | 96.19    |
| 1.0E-6                                  |                        | 100.45   |
| 10.0E-6                                 |                        | 107.13   |
| <b>BETAMETHASONE</b>                    |                        |          |
| 10.0E-9                                 |                        | 114.31   |
| 100.0E-9                                |                        | 105.69   |
| 1.0E-6                                  |                        | 96.30    |
| 10.0E-6                                 |                        | 102.08   |
| <b>BETAMETHASONE 17,21-DIPROPIONATE</b> |                        |          |
| 10.0E-9                                 |                        | 102.44   |
| 100.0E-9                                |                        | 104.28   |
| 1.0E-6                                  |                        | 99.13    |
| 10.0E-6                                 |                        | 86.33    |
| <b>BETAMETHASONE ACETATE</b>            |                        |          |
| 10.0E-9                                 |                        | 82.56    |
| 100.0E-9                                |                        | 87.46    |
| 1.0E-6                                  |                        | 87.82    |
| 10.0E-6                                 |                        | 80.23    |
| <b>BETAMETHASONE VALERATE</b>           |                        |          |
| 10.0E-9                                 |                        | 96.49    |
| 100.0E-9                                |                        | 102.95   |
| 1.0E-6                                  |                        | 102.66   |
| 10.0E-6                                 |                        | 96.67    |
| <b>BETAMETHAZONE SODIUM PHOSPHATE</b>   |                        |          |
| 10.0E-9                                 |                        | 92.60    |
| 100.0E-9                                |                        | 104.92   |
| 1.0E-6                                  |                        | 109.13   |
| 10.0E-6                                 |                        | 105.00   |
| <b>BETAMIPRON</b>                       |                        |          |
| 10.0E-9                                 |                        | 117.59   |
| 100.0E-9                                |                        | 109.67   |
| 1.0E-6                                  |                        | 116.70   |
| 10.0E-6                                 |                        | 118.93   |
| <b>beta-NAPHTHOL</b>                    |                        |          |
| 10.0E-9                                 |                        | 115.17   |
| 100.0E-9                                |                        | 102.26   |
| 1.0E-6                                  |                        | 101.80   |
| 10.0E-6                                 |                        | 97.19    |
| <b>beta-PELTATIN</b>                    |                        |          |
| 10.0E-9                                 |                        | 118.48   |
| 100.0E-9                                |                        | 108.62   |
| 1.0E-6                                  |                        | 1.82     |
| 10.0E-6                                 |                        | 2.88     |
| <b>BETA-PROPIOLACTONE</b>               |                        |          |
| 10.0E-9                                 |                        | 97.78    |
| 100.0E-9                                |                        | 83.43    |
| 1.0E-6                                  |                        | 99.75    |
| 10.0E-6                                 |                        | 60.45    |
| <b>beta-TOXICAROL</b>                   |                        |          |
| 10.0E-9                                 |                        | 114.89   |
| 100.0E-9                                |                        | 114.49   |
| 1.0E-6                                  |                        | 23.49    |
| 10.0E-6                                 |                        | 12.54    |
| <b>BETHANECHOL CHLORIDE</b>             |                        |          |
| 10.0E-9                                 |                        | 109.28   |
| 100.0E-9                                |                        | 110.15   |
| 1.0E-6                                  |                        | 110.86   |
| 10.0E-6                                 |                        | 101.57   |

| Compounds and Final Concentrations (M) | Average of % Viability | Hits (✓) |
|----------------------------------------|------------------------|----------|
| <b>BETULIN</b>                         |                        |          |
| 10.0E-9                                |                        | 95.46    |
| 100.0E-9                               |                        | 93.46    |
| 1.0E-6                                 |                        | 92.23    |
| 10.0E-6                                |                        | 79.30    |
| <b>BETULINIC ACID</b>                  |                        |          |
| 10.0E-9                                |                        | 104.97   |
| 100.0E-9                               |                        | 102.88   |
| 1.0E-6                                 |                        | 112.66   |
| 10.0E-6                                |                        | 85.51    |
| <b>BEZAFIBRATE</b>                     |                        |          |
| 10.0E-9                                |                        | 110.76   |
| 100.0E-9                               |                        | 109.10   |
| 1.0E-6                                 |                        | 106.65   |
| 10.0E-6                                |                        | 110.16   |
| <b>BICUCULLINE (+)</b>                 |                        |          |
| 10.0E-9                                |                        | 86.42    |
| 100.0E-9                               |                        | 81.33    |
| 1.0E-6                                 |                        | 90.85    |
| 10.0E-6                                |                        | 84.05    |
| <b>BICUCULLINE(-) METHIODIDE</b>       |                        |          |
| 10.0E-9                                |                        | 119.81   |
| 100.0E-9                               |                        | 113.13   |
| 1.0E-6                                 |                        | 125.58   |
| 10.0E-6                                |                        | 107.96   |
| <b>BIFONAZOLE</b>                      |                        |          |
| 10.0E-9                                |                        | 110.04   |
| 100.0E-9                               |                        | 100.88   |
| 1.0E-6                                 |                        | 97.22    |
| 10.0E-6                                |                        | 76.10    |
| <b>BILIRUBIN</b>                       |                        |          |
| 10.0E-9                                |                        | 90.76    |
| 100.0E-9                               |                        | 99.14    |
| 1.0E-6                                 |                        | 96.89    |
| 10.0E-6                                |                        | 84.30    |
| <b>BIOCHANIN A</b>                     |                        |          |
| 10.0E-9                                |                        | 114.21   |
| 100.0E-9                               |                        | 143.58   |
| 1.0E-6                                 |                        | 105.41   |
| 10.0E-6                                |                        | 81.02    |
| <b>BIOTIN</b>                          |                        |          |
| 10.0E-9                                |                        | 92.46    |
| 100.0E-9                               |                        | 89.84    |
| 1.0E-6                                 |                        | 82.36    |
| 10.0E-6                                |                        | 85.41    |
| <b>BIPERIDEN</b>                       |                        |          |
| 10.0E-9                                |                        | 127.23   |
| 100.0E-9                               |                        | 107.83   |
| 1.0E-6                                 |                        | 107.79   |
| 10.0E-6                                |                        | 109.54   |
| <b>BISACODYL</b>                       |                        |          |
| 10.0E-9                                |                        | 108.59   |
| 100.0E-9                               |                        | 113.96   |
| 1.0E-6                                 |                        | 104.66   |
| 10.0E-6                                |                        | 99.73    |
| <b>BISANHYDRORUTILANTINONE</b>         |                        |          |
| 10.0E-9                                |                        | 110.92   |
| 100.0E-9                               |                        | 110.59   |
| 1.0E-6                                 |                        | 109.00   |
| 10.0E-6                                |                        | 99.02    |
| <b>BISMUTH SUBSALICYLATE</b>           |                        |          |
| 10.0E-9                                |                        | 91.09    |
| 100.0E-9                               |                        | 107.55   |
| 1.0E-6                                 |                        | 101.25   |
| 10.0E-6                                |                        | 89.98    |
| <b>BISOPROLOL FUMARATE</b>             |                        |          |
| 10.0E-9                                |                        | 115.13   |
| 100.0E-9                               |                        | 102.94   |
| 1.0E-6                                 |                        | 109.08   |
| 10.0E-6                                |                        | 105.41   |
| <b>BISPHENOL A</b>                     |                        |          |
| 10.0E-9                                |                        | 118.26   |
| 100.0E-9                               |                        | 123.09   |
| 1.0E-6                                 |                        | 119.21   |
| 10.0E-6                                |                        | 111.75   |
| <b>BISSALICYL FUMARATE</b>             |                        |          |
| 10.0E-9                                |                        | 119.71   |
| 100.0E-9                               |                        | 116.28   |
| 1.0E-6                                 |                        | 130.75   |
| 10.0E-6                                |                        | 118.26   |

| Compounds and Final Concentrations (M)                         | Average of % Viability | Hits (✓) |
|----------------------------------------------------------------|------------------------|----------|
| <b>BITHIONATE SODIUM</b>                                       |                        |          |
| 10.0E-9                                                        |                        | 113.56   |
| 100.0E-9                                                       |                        | 116.27   |
| 1.0E-6                                                         |                        | 105.32   |
| 10.0E-6                                                        |                        | 112.81   |
| <b>BITOSCANATE</b>                                             |                        |          |
| 10.0E-9                                                        |                        | 123.49   |
| 100.0E-9                                                       |                        | 116.19   |
| 1.0E-6                                                         |                        | 105.48   |
| 10.0E-6                                                        |                        | 122.52   |
| <b>BIXIN</b>                                                   |                        |          |
| 10.0E-9                                                        |                        | 112.93   |
| 100.0E-9                                                       |                        | 111.88   |
| 1.0E-6                                                         |                        | 111.06   |
| 10.0E-6                                                        |                        | 91.29    |
| <b>BLEOMYCIN (bleomycin B2 shown)</b>                          |                        |          |
| 10.0E-9                                                        |                        | 30.78    |
| 100.0E-9                                                       |                        | 1.85     |
| 1.0E-6                                                         |                        | 1.35     |
| 10.0E-6                                                        |                        | 1.49     |
| <b>BOLDINE</b>                                                 |                        |          |
| 10.0E-9                                                        |                        | 112.35   |
| 100.0E-9                                                       |                        | 118.40   |
| 1.0E-6                                                         |                        | 120.88   |
| 10.0E-6                                                        |                        | 118.15   |
| <b>BOVINOCIDIN (3-nitropropionic acid)</b>                     |                        |          |
| 10.0E-9                                                        |                        | 108.73   |
| 100.0E-9                                                       |                        | 117.50   |
| 1.0E-6                                                         |                        | 101.26   |
| 10.0E-6                                                        |                        | 48.11    |
| <b>BRAZILEIN</b>                                               |                        |          |
| 10.0E-9                                                        |                        | 142.52   |
| 100.0E-9                                                       |                        | 126.02   |
| 1.0E-6                                                         |                        | 126.04   |
| 10.0E-6                                                        |                        | 129.66   |
| <b>BRAZILIN</b>                                                |                        |          |
| 10.0E-9                                                        |                        | 139.11   |
| 100.0E-9                                                       |                        | 108.80   |
| 1.0E-6                                                         |                        | 101.51   |
| 10.0E-6                                                        |                        | 78.11    |
| <b>BRETYLIUM TOSYLATE</b>                                      |                        |          |
| 10.0E-9                                                        |                        | 105.53   |
| 100.0E-9                                                       |                        | 105.44   |
| 1.0E-6                                                         |                        | 99.14    |
| 10.0E-6                                                        |                        | 101.48   |
| <b>BROMHEXINE HYDROCHLORIDE</b>                                |                        |          |
| 10.0E-9                                                        |                        | 123.17   |
| 100.0E-9                                                       |                        | 112.94   |
| 1.0E-6                                                         |                        | 108.59   |
| 10.0E-6                                                        |                        | 95.64    |
| <b>BROMINDIONE</b>                                             |                        |          |
| 10.0E-9                                                        |                        | 98.60    |
| 100.0E-9                                                       |                        | 114.07   |
| 1.0E-6                                                         |                        | 118.68   |
| 10.0E-6                                                        |                        | 106.03   |
| <b>BROMO-3-HYDROXY-4-(SUCCIN-2-YL)-CARYOLANE gamma-LACTONE</b> |                        |          |
| 10.0E-9                                                        |                        | 94.69    |
| 100.0E-9                                                       |                        | 93.96    |
| 1.0E-6                                                         |                        | 91.87    |
| 10.0E-6                                                        |                        | 94.18    |
| <b>BROMOCRIPTINE MESYLATE</b>                                  |                        |          |
| 10.0E-9                                                        |                        | 98.91    |
| 100.0E-9                                                       |                        | 114.61   |
| 1.0E-6                                                         |                        | 113.30   |
| 10.0E-6                                                        |                        | 40.24    |
| <b>BROMOPRIDE</b>                                              |                        |          |
| 10.0E-9                                                        |                        | 108.48   |
| 100.0E-9                                                       |                        | 101.78   |
| 1.0E-6                                                         |                        | 94.59    |
| 10.0E-6                                                        |                        | 99.82    |
| <b>BROMPERIDOL</b>                                             |                        |          |
| 10.0E-9                                                        |                        | 111.05   |
| 100.0E-9                                                       |                        | 111.74   |
| 1.0E-6                                                         |                        | 103.78   |
| 10.0E-6                                                        |                        | 90.41    |
| <b>BROMPHENIRAMINE MALEATE</b>                                 |                        |          |
| 10.0E-9                                                        |                        | 103.21   |
| 100.0E-9                                                       |                        | 85.42    |
| 1.0E-6                                                         |                        | 51.36    |
| 10.0E-6                                                        |                        | 41.58    |

| Compounds and Final Concentrations (M) | Average of % Viability | Hits (✓) |
|----------------------------------------|------------------------|----------|
| <b>BROXYQUINOLINE</b>                  |                        |          |
| 10.0E-9                                |                        | 102.43   |
| 100.0E-9                               |                        | 104.25   |
| 1.0E-6                                 |                        | 113.11   |
| 10.0E-6                                |                        | 93.80    |
| <b>BRUCINE</b>                         |                        |          |
| 10.0E-9                                |                        | 123.00   |
| 100.0E-9                               |                        | 52.66    |
| 1.0E-6                                 |                        | 97.80    |
| 10.0E-6                                |                        | 45.36    |
| <b>BUCETIN</b>                         |                        |          |
| 10.0E-9                                |                        | 117.66   |
| 100.0E-9                               |                        | 114.80   |
| 1.0E-6                                 |                        | 112.38   |
| 10.0E-6                                |                        | 108.78   |
| <b>BUCLADESINE</b>                     |                        |          |
| 10.0E-9                                |                        | 115.53   |
| 100.0E-9                               |                        | 113.96   |
| 1.0E-6                                 |                        | 119.24   |
| 10.0E-6                                |                        | 106.83   |
| <b>BUDESONIDE</b>                      |                        |          |
| 10.0E-9                                |                        | 107.92   |
| 100.0E-9                               |                        | 59.48    |
| 1.0E-6                                 |                        | 113.43   |
| 10.0E-6                                |                        | 89.24    |
| <b>BUFEXAMAC</b>                       |                        |          |
| 10.0E-9                                |                        | 90.75    |
| 100.0E-9                               |                        | 84.87    |
| 1.0E-6                                 |                        | 82.67    |
| 10.0E-6                                |                        | 71.83    |
| <b>BUFLOMEDIL HYDROCHLORIDE</b>        |                        |          |
| 10.0E-9                                |                        | 130.13   |
| 100.0E-9                               |                        | 119.13   |
| 1.0E-6                                 |                        | 119.91   |
| 10.0E-6                                |                        | 71.34    |
| <b>BUMETANIDE</b>                      |                        |          |
| 10.0E-9                                |                        | 98.75    |
| 100.0E-9                               |                        | 110.75   |
| 1.0E-6                                 |                        | 104.67   |
| 10.0E-6                                |                        | 103.52   |
| <b>BUPIVACAINE HYDROCHLORIDE</b>       |                        |          |
| 10.0E-9                                |                        | 53.38    |
| 100.0E-9                               |                        | 102.06   |
| 1.0E-6                                 |                        | 102.18   |
| 10.0E-6                                |                        | 94.48    |
| <b>BUPROPION</b>                       |                        |          |
| 10.0E-9                                |                        | 91.19    |
| 100.0E-9                               |                        | 100.37   |
| 1.0E-6                                 |                        | 105.01   |
| 10.0E-6                                |                        | 108.05   |
| <b>BUSPIRONE HYDROCHLORIDE</b>         |                        |          |
| 10.0E-9                                |                        | 117.07   |
| 100.0E-9                               |                        | 112.90   |
| 1.0E-6                                 |                        | 111.75   |
| 10.0E-6                                |                        | 103.11   |
| <b>BUSSEIN</b>                         |                        |          |
| 10.0E-9                                |                        | 98.36    |
| 100.0E-9                               |                        | 100.09   |
| 1.0E-6                                 |                        | 98.55    |
| 10.0E-6                                |                        | 85.03    |
| <b>BUSULFAN</b>                        |                        |          |
| 10.0E-9                                |                        | 110.20   |
| 100.0E-9                               |                        | 119.10   |
| 1.0E-6                                 |                        | 85.86    |
| 10.0E-6                                |                        | 15.63    |
| <b>BUTACAINE</b>                       |                        |          |
| 10.0E-9                                |                        | 113.64   |
| 100.0E-9                               |                        | 99.05    |
| 1.0E-6                                 |                        | 92.37    |
| 10.0E-6                                |                        | 80.67    |
| <b>BUTAMBEN</b>                        |                        |          |
| 10.0E-9                                |                        | 108.13   |
| 100.0E-9                               |                        | 44.05    |
| 1.0E-6                                 |                        | 112.88   |
| 10.0E-6                                |                        | 61.06    |
| <b>BUTOCONAZOLE</b>                    |                        |          |
| 10.0E-9                                |                        | 115.35   |
| 100.0E-9                               |                        | 57.26    |
| 1.0E-6                                 |                        | 108.71   |
| 10.0E-6                                |                        | 97.38    |

| Compounds and Final Concentrations (M) | Average of % Viability | Hits (✓) |
|----------------------------------------|------------------------|----------|
| <b>BUTYL PARABEN</b>                   |                        |          |
| 10.0E-9                                |                        | 115.72   |
| 100.0E-9                               |                        | 113.54   |
| 1.0E-6                                 |                        | 110.10   |
| 10.0E-6                                |                        | 109.27   |
| <b>BUTYLATED HYDROXYTOLUENE</b>        |                        |          |
| 10.0E-9                                |                        | 113.43   |
| 100.0E-9                               |                        | 130.37   |
| 1.0E-6                                 |                        | 111.66   |
| 10.0E-6                                |                        | 112.26   |
| <b>CACODYLIC ACID</b>                  |                        |          |
| 10.0E-9                                |                        | 94.53    |
| 100.0E-9                               |                        | 92.31    |
| 1.0E-6                                 |                        | 93.66    |
| 10.0E-6                                |                        | 80.22    |
| <b>CADAVERINE TARTRATE</b>             |                        |          |
| 10.0E-9                                |                        | 119.27   |
| 100.0E-9                               |                        | 139.35   |
| 1.0E-6                                 |                        | 110.77   |
| 10.0E-6                                |                        | 114.32   |
| <b>CADIN-4-EN-10-OL</b>                |                        |          |
| 10.0E-9                                |                        | 139.97   |
| 100.0E-9                               |                        | 139.27   |
| 1.0E-6                                 |                        | 111.03   |
| 10.0E-6                                |                        | 108.71   |
| <b>CAFESTOL</b>                        |                        |          |
| 10.0E-9                                |                        | 115.84   |
| 100.0E-9                               |                        | 112.43   |
| 1.0E-6                                 |                        | 112.24   |
| 10.0E-6                                |                        | 111.06   |
| <b>CAFESTOL ACETATE</b>                |                        |          |
| 10.0E-9                                |                        | 119.76   |
| 100.0E-9                               |                        | 112.22   |
| 1.0E-6                                 |                        | 109.15   |
| 10.0E-6                                |                        | 92.38    |
| <b>CAFFEIC ACID</b>                    |                        |          |
| 10.0E-9                                |                        | 123.41   |
| 100.0E-9                               |                        | 114.49   |
| 1.0E-6                                 |                        | 106.95   |
| 10.0E-6                                |                        | 78.32    |
| <b>CAFFEINE</b>                        |                        |          |
| 10.0E-9                                |                        | 134.77   |
| 100.0E-9                               |                        | 124.26   |
| 1.0E-6                                 |                        | 120.90   |
| 10.0E-6                                |                        | 122.04   |
| <b>CALCIUM GLUCEPTATE</b>              |                        |          |
| 10.0E-9                                |                        | 112.48   |
| 100.0E-9                               |                        | 53.28    |
| 1.0E-6                                 |                        | 107.00   |
| 10.0E-6                                |                        | 104.01   |
| <b>CAMPHOR (1R)</b>                    |                        |          |
| 10.0E-9                                |                        | 104.27   |
| 100.0E-9                               |                        | 112.44   |
| 1.0E-6                                 |                        | 110.24   |
| 10.0E-6                                |                        | 103.79   |
| <b>CAMPTOTHECIN</b>                    |                        |          |
| 10.0E-9                                |                        | 81.39    |
| 100.0E-9                               |                        | 2.82     |
| 1.0E-6                                 |                        | 2.19     |
| 10.0E-6                                |                        | 0.92     |
| <b>CAMYLOFINE DIHYDROCHLORIDE</b>      |                        |          |
| 10.0E-9                                |                        | 130.67   |
| 100.0E-9                               |                        | 131.50   |
| 1.0E-6                                 |                        | 135.31   |
| 10.0E-6                                |                        | 98.46    |
| <b>CANAVANINE</b>                      |                        |          |
| 10.0E-9                                |                        | 118.80   |
| 100.0E-9                               |                        | 99.21    |
| 1.0E-6                                 |                        | 108.77   |
| 10.0E-6                                |                        | 101.34   |
| <b>CANDESARTAN CILEXTIL</b>            |                        |          |
| 10.0E-9                                |                        | 114.02   |
| 100.0E-9                               |                        | 121.37   |
| 1.0E-6                                 |                        | 129.11   |
| 10.0E-6                                |                        | 109.91   |
| <b>CANRENOIC ACID, POTASSIUM SALT</b>  |                        |          |
| 10.0E-9                                |                        | 93.28    |
| 100.0E-9                               |                        | 94.28    |
| 1.0E-6                                 |                        | 83.60    |
| 10.0E-6                                |                        | 85.90    |

| Compounds and Final Concentrations (M) | Average of % Viability | Hits (✓) |
|----------------------------------------|------------------------|----------|
| <b>CANRENONE</b>                       |                        |          |
| 10.0E-9                                |                        | 107.38   |
| 100.0E-9                               |                        | 128.05   |
| 1.0E-6                                 |                        | 111.57   |
| 10.0E-6                                |                        | 100.81   |
| <b>CANTHARIDIN</b>                     |                        |          |
| 10.0E-9                                |                        | 96.32    |
| 100.0E-9                               |                        | 91.96    |
| 1.0E-6                                 |                        | 91.32    |
| 10.0E-6                                |                        | 0.11     |
| <b>CANTHAXANTHIN (euglenanone)</b>     |                        |          |
| 10.0E-9                                |                        | 108.37   |
| 100.0E-9                               |                        | 108.42   |
| 1.0E-6                                 |                        | 30.93    |
| 10.0E-6                                |                        | 1.88     |
| <b>CAPERATIC ACID</b>                  |                        |          |
| 10.0E-9                                |                        | 121.77   |
| 100.0E-9                               |                        | 125.64   |
| 1.0E-6                                 |                        | 124.18   |
| 10.0E-6                                |                        | 122.80   |
| <b>CAPOBENIC ACID</b>                  |                        |          |
| 10.0E-9                                |                        | 100.08   |
| 100.0E-9                               |                        | 117.60   |
| 1.0E-6                                 |                        | 113.16   |
| 10.0E-6                                |                        | 120.14   |
| <b>CAPREOMYCIN SULFATE</b>             |                        |          |
| 10.0E-9                                |                        | 97.97    |
| 100.0E-9                               |                        | 90.61    |
| 1.0E-6                                 |                        | 109.24   |
| 10.0E-6                                |                        | 98.98    |
| <b>CAPSAICIN</b>                       |                        |          |
| 10.0E-9                                |                        | 93.54    |
| 100.0E-9                               |                        | 100.79   |
| 1.0E-6                                 |                        | 103.54   |
| 10.0E-6                                |                        | 93.76    |
| <b>CAPSANTHIN</b>                      |                        |          |
| 10.0E-9                                |                        | 111.63   |
| 100.0E-9                               |                        | 123.79   |
| 1.0E-6                                 |                        | 107.87   |
| 10.0E-6                                |                        | 99.45    |
| <b>CAPTOPRIL</b>                       |                        |          |
| 10.0E-9                                |                        | 119.67   |
| 100.0E-9                               |                        | 106.76   |
| 1.0E-6                                 |                        | 101.41   |
| 10.0E-6                                |                        | 109.76   |
| <b>CARAPIN</b>                         |                        |          |
| 10.0E-9                                |                        | 110.78   |
| 100.0E-9                               |                        | 122.01   |
| 1.0E-6                                 |                        | 113.13   |
| 10.0E-6                                |                        | 91.06    |
| <b>CARAPIN-8(9)-ENE</b>                |                        |          |
| 10.0E-9                                |                        | 115.29   |
| 100.0E-9                               |                        | 117.52   |
| 1.0E-6                                 |                        | 105.12   |
| 10.0E-6                                |                        | 93.61    |
| <b>CARBACHOL</b>                       |                        |          |
| 10.0E-9                                |                        | 67.75    |
| 100.0E-9                               |                        | 98.83    |
| 1.0E-6                                 |                        | 90.75    |
| 10.0E-6                                |                        | 90.28    |
| <b>CARBADOX</b>                        |                        |          |
| 10.0E-9                                |                        | 114.01   |
| 100.0E-9                               |                        | 103.53   |
| 1.0E-6                                 |                        | 96.90    |
| 10.0E-6                                |                        | 92.13    |
| <b>CARBAMAZEPINE</b>                   |                        |          |
| 10.0E-9                                |                        | 103.71   |
| 100.0E-9                               |                        | 97.80    |
| 1.0E-6                                 |                        | 98.10    |
| 10.0E-6                                |                        | 93.80    |
| <b>CARBENICILLIN DISODIUM</b>          |                        |          |
| 10.0E-9                                |                        | 110.47   |
| 100.0E-9                               |                        | 104.23   |
| 1.0E-6                                 |                        | 96.73    |
| 10.0E-6                                |                        | 107.66   |
| <b>CARBENOXOLONE SODIUM</b>            |                        |          |
| 10.0E-9                                |                        | 109.11   |
| 100.0E-9                               |                        | 109.18   |
| 1.0E-6                                 |                        | 111.86   |
| 10.0E-6                                |                        | 105.12   |

| Compounds and Final Concentrations (M) | Average of % Viability | Hits (✓) |
|----------------------------------------|------------------------|----------|
| <b>CARBIDOPA</b>                       |                        |          |
| 10.0E-9                                |                        | 119.61   |
| 100.0E-9                               |                        | 111.77   |
| 1.0E-6                                 |                        | 103.46   |
| 10.0E-6                                |                        | 54.48    |
| <b>CARBIMAZOLE</b>                     |                        |          |
| 10.0E-9                                |                        | 125.97   |
| 100.0E-9                               |                        | 113.71   |
| 1.0E-6                                 |                        | 115.94   |
| 10.0E-6                                |                        | 106.52   |
| <b>CARBINOXAMINE MALEATE</b>           |                        |          |
| 10.0E-9                                |                        | 105.36   |
| 100.0E-9                               |                        | 99.03    |
| 1.0E-6                                 |                        | 92.70    |
| 10.0E-6                                |                        | 97.09    |
| <b>CARBOPLATIN</b>                     |                        |          |
| 10.0E-9                                |                        | 83.43    |
| 100.0E-9                               |                        | 87.50    |
| 1.0E-6                                 |                        | 69.47    |
| 10.0E-6                                |                        | 4.21     |
| <b>CARISOPRODOL</b>                    |                        |          |
| 10.0E-9                                |                        | 101.48   |
| 100.0E-9                               |                        | 104.56   |
| 1.0E-6                                 |                        | 103.51   |
| 10.0E-6                                |                        | 90.96    |
| <b>CARMINIC ACID</b>                   |                        |          |
| 10.0E-9                                |                        | 94.90    |
| 100.0E-9                               |                        | 84.72    |
| 1.0E-6                                 |                        | 94.76    |
| 10.0E-6                                |                        | 61.37    |
| <b>CARMOFUR</b>                        |                        |          |
| 10.0E-9                                |                        | 116.57   |
| 100.0E-9                               |                        | 104.85   |
| 1.0E-6                                 |                        | 101.64   |
| 10.0E-6                                |                        | 1.96     |
| <b>CARMUSTINE</b>                      |                        |          |
| 10.0E-9                                |                        | 122.51   |
| 100.0E-9                               |                        | 112.11   |
| 1.0E-6                                 |                        | 104.43   |
| 10.0E-6                                |                        | 73.88    |
| <b>CARNITINE (dl) HYDROCHLORIDE</b>    |                        |          |
| 10.0E-9                                |                        | 129.24   |
| 100.0E-9                               |                        | 137.59   |
| 1.0E-6                                 |                        | 120.86   |
| 10.0E-6                                |                        | 100.19   |
| <b>CARNOSIC ACID</b>                   |                        |          |
| 10.0E-9                                |                        | 122.50   |
| 100.0E-9                               |                        | 115.51   |
| 1.0E-6                                 |                        | 94.96    |
| 10.0E-6                                |                        | 102.57   |
| <b>CARNOSINE</b>                       |                        |          |
| 10.0E-9                                |                        | 135.89   |
| 100.0E-9                               |                        | 140.83   |
| 1.0E-6                                 |                        | 124.45   |
| 10.0E-6                                |                        | 123.72   |
| <b>CARPROFEN</b>                       |                        |          |
| 10.0E-9                                |                        | 113.35   |
| 100.0E-9                               |                        | 117.12   |
| 1.0E-6                                 |                        | 107.13   |
| 10.0E-6                                |                        | 107.52   |
| <b>CARSALAM</b>                        |                        |          |
| 10.0E-9                                |                        | 126.45   |
| 100.0E-9                               |                        | 99.17    |
| 1.0E-6                                 |                        | 101.48   |
| 10.0E-6                                |                        | 91.06    |
| <b>CARVEDILOL</b>                      |                        |          |
| 10.0E-9                                |                        | 123.28   |
| 100.0E-9                               |                        | 111.38   |
| 1.0E-6                                 |                        | 117.90   |
| 10.0E-6                                |                        | 113.14   |
| <b>CARYLOPHYLLENE OXIDE</b>            |                        |          |
| 10.0E-9                                |                        | 96.06    |
| 100.0E-9                               |                        | 96.27    |
| 1.0E-6                                 |                        | 121.67   |
| 10.0E-6                                |                        | 108.55   |
| <b>CARYOPHYLLENE [(-)]</b>             |                        |          |
| 10.0E-9                                |                        | 109.00   |
| 100.0E-9                               |                        | 113.43   |
| 1.0E-6                                 |                        | 107.94   |
| 10.0E-6                                |                        | 112.25   |

| Compounds and Final Concentrations (M) | Average of % Viability | Hits (✓) |
|----------------------------------------|------------------------|----------|
| <b>CARZENIDE</b>                       |                        |          |
| 10.0E-9                                |                        | 87.36    |
| 100.0E-9                               |                        | 85.72    |
| 1.0E-6                                 |                        | 95.61    |
| 10.0E-6                                |                        | 89.35    |
| <b>CATECHIN PENTAACETATE</b>           |                        |          |
| 10.0E-9                                |                        | 121.25   |
| 100.0E-9                               |                        | 136.05   |
| 1.0E-6                                 |                        | 123.79   |
| 10.0E-6                                |                        | 111.43   |
| <b>CATECHIN TETRAMETHYLETHER</b>       |                        |          |
| 10.0E-9                                |                        | 113.13   |
| 100.0E-9                               |                        | 132.43   |
| 1.0E-6                                 |                        | 120.01   |
| 10.0E-6                                |                        | 103.08   |
| <b>CEDRELONE</b>                       |                        |          |
| 10.0E-9                                |                        | 103.52   |
| 100.0E-9                               |                        | 123.29   |
| 1.0E-6                                 |                        | 96.17    |
| 10.0E-6                                |                        | 1.18     |
| <b>CEDROL</b>                          |                        |          |
| 10.0E-9                                |                        | 105.22   |
| 100.0E-9                               |                        | 109.65   |
| 1.0E-6                                 |                        | 105.78   |
| 10.0E-6                                |                        | 106.78   |
| <b>CEDRYL ACETATE</b>                  |                        |          |
| 10.0E-9                                |                        | 124.47   |
| 100.0E-9                               |                        | 131.36   |
| 1.0E-6                                 |                        | 123.45   |
| 10.0E-6                                |                        | 122.68   |
| <b>CEFACTOR</b>                        |                        |          |
| 10.0E-9                                |                        | 102.58   |
| 100.0E-9                               |                        | 90.48    |
| 1.0E-6                                 |                        | 85.80    |
| 10.0E-6                                |                        | 66.25    |
| <b>CEFADROXIL</b>                      |                        |          |
| 10.0E-9                                |                        | 98.29    |
| 100.0E-9                               |                        | 102.78   |
| 1.0E-6                                 |                        | 101.66   |
| 10.0E-6                                |                        | 93.93    |
| <b>CEFAMANDOLE NAFATE</b>              |                        |          |
| 10.0E-9                                |                        | 110.61   |
| 100.0E-9                               |                        | 104.73   |
| 1.0E-6                                 |                        | 105.57   |
| 10.0E-6                                |                        | 114.67   |
| <b>CEFAMANDOLE SODIUM</b>              |                        |          |
| 10.0E-9                                |                        | 104.66   |
| 100.0E-9                               |                        | 113.07   |
| 1.0E-6                                 |                        | 105.67   |
| 10.0E-6                                |                        | 97.55    |
| <b>CEFAZOLIN SODIUM</b>                |                        |          |
| 10.0E-9                                |                        | 115.84   |
| 100.0E-9                               |                        | 121.59   |
| 1.0E-6                                 |                        | 107.98   |
| 10.0E-6                                |                        | 99.21    |
| <b>CEFDINIR</b>                        |                        |          |
| 10.0E-9                                |                        | 112.74   |
| 100.0E-9                               |                        | 113.71   |
| 1.0E-6                                 |                        | 101.60   |
| 10.0E-6                                |                        | 107.43   |
| <b>CEFDITORIN PIVOXIL</b>              |                        |          |
| 10.0E-9                                |                        | 91.30    |
| 100.0E-9                               |                        | 84.93    |
| 1.0E-6                                 |                        | 86.98    |
| 10.0E-6                                |                        | 87.40    |
| <b>CEFMETAZOLE SODIUM</b>              |                        |          |
| 10.0E-9                                |                        | 94.12    |
| 100.0E-9                               |                        | 107.03   |
| 1.0E-6                                 |                        | 107.46   |
| 10.0E-6                                |                        | 111.36   |
| <b>CEFONICID SODIUM</b>                |                        |          |
| 10.0E-9                                |                        | 114.97   |
| 100.0E-9                               |                        | 124.53   |
| 1.0E-6                                 |                        | 113.53   |
| 10.0E-6                                |                        | 117.37   |
| <b>CEFOPERAZONE SODIUM</b>             |                        |          |
| 10.0E-9                                |                        | 119.91   |
| 100.0E-9                               |                        | 119.89   |
| 1.0E-6                                 |                        | 106.49   |
| 10.0E-6                                |                        | 104.86   |



| Compounds and Final Concentrations (M) | Average of % Viability | Hits (✓) |
|----------------------------------------|------------------------|----------|
| <b>CEFOTAXIME SODIUM</b>               |                        |          |
| 10.0E-9                                |                        | 102.85   |
| 100.0E-9                               |                        | 107.96   |
| 1.0E-6                                 |                        | 96.93    |
| 10.0E-6                                |                        | 103.91   |
| <b>CEFOXITIN SODIUM</b>                |                        |          |
| 10.0E-9                                |                        | 111.64   |
| 100.0E-9                               |                        | 105.52   |
| 1.0E-6                                 |                        | 113.28   |
| 10.0E-6                                |                        | 105.16   |
| <b>CEFPODOXIME PROXETIL</b>            |                        |          |
| 10.0E-9                                |                        | 124.22   |
| 100.0E-9                               |                        | 121.14   |
| 1.0E-6                                 |                        | 109.08   |
| 10.0E-6                                |                        | 104.05   |
| <b>CEFPROZIL</b>                       |                        |          |
| 10.0E-9                                |                        | 98.22    |
| 100.0E-9                               |                        | 99.54    |
| 1.0E-6                                 |                        | 90.51    |
| 10.0E-6                                |                        | 82.99    |
| <b>CEFSULODIN SODIUM</b>               |                        |          |
| 10.0E-9                                |                        | 114.00   |
| 100.0E-9                               |                        | 111.11   |
| 1.0E-6                                 |                        | 103.42   |
| 10.0E-6                                |                        | 115.08   |
| <b>CEFTAZIDIME</b>                     |                        |          |
| 10.0E-9                                |                        | 112.85   |
| 100.0E-9                               |                        | 114.02   |
| 1.0E-6                                 |                        | 107.45   |
| 10.0E-6                                |                        | 109.76   |
| <b>CEFTIBUTEN</b>                      |                        |          |
| 10.0E-9                                |                        | 109.60   |
| 100.0E-9                               |                        | 105.99   |
| 1.0E-6                                 |                        | 96.98    |
| 10.0E-6                                |                        | 107.17   |
| <b>CEFTRIAZONE SODIUM TRIHYDRATE</b>   |                        |          |
| 10.0E-9                                |                        | 116.36   |
| 100.0E-9                               |                        | 113.26   |
| 1.0E-6                                 |                        | 101.44   |
| 10.0E-6                                |                        | 105.97   |
| <b>CEFUROXIME AXETIL</b>               |                        |          |
| 10.0E-9                                |                        | 98.45    |
| 100.0E-9                               |                        | 116.27   |
| 1.0E-6                                 |                        | 119.85   |
| 10.0E-6                                |                        | 111.15   |
| <b>CEFUROXIME SODIUM</b>               |                        |          |
| 10.0E-9                                |                        | 111.32   |
| 100.0E-9                               |                        | 125.13   |
| 1.0E-6                                 |                        | 100.96   |
| 10.0E-6                                |                        | 103.08   |
| <b>CELASTROL</b>                       |                        |          |
| 10.0E-9                                |                        | 126.22   |
| 100.0E-9                               |                        | 111.08   |
| 1.0E-6                                 |                        | 110.95   |
| 10.0E-6                                |                        | 0.03     |
| <b>CELECOXIB</b>                       |                        |          |
| 10.0E-9                                |                        | 117.66   |
| 100.0E-9                               |                        | 117.43   |
| 1.0E-6                                 |                        | 104.63   |
| 10.0E-6                                |                        | 107.94   |
| <b>CELLOBIOSE (D[+])</b>               |                        |          |
| 10.0E-9                                |                        | 110.39   |
| 100.0E-9                               |                        | 115.43   |
| 1.0E-6                                 |                        | 108.06   |
| 10.0E-6                                |                        | 111.00   |
| <b>CEPHALEXIN</b>                      |                        |          |
| 10.0E-9                                |                        | 124.56   |
| 100.0E-9                               |                        | 120.98   |
| 1.0E-6                                 |                        | 119.65   |
| 10.0E-6                                |                        | 111.14   |
| <b>CEPHALOSPORIN C SODIUM</b>          |                        |          |
| 10.0E-9                                |                        | 103.12   |
| 100.0E-9                               |                        | 111.08   |
| 1.0E-6                                 |                        | 103.42   |
| 10.0E-6                                |                        | 115.26   |
| <b>CEPHALOTHIN SODIUM</b>              |                        |          |
| 10.0E-9                                |                        | 114.95   |
| 100.0E-9                               |                        | 114.03   |
| 1.0E-6                                 |                        | 109.43   |
| 10.0E-6                                |                        | 103.39   |

| Compounds and Final Concentrations (M) | Average of % Viability | Hits (✓) |
|----------------------------------------|------------------------|----------|
| <b>CEPHAPIRIN SODIUM</b>               |                        |          |
| 10.0E-9                                |                        | 113.62   |
| 100.0E-9                               |                        | 108.71   |
| 1.0E-6                                 |                        | 97.39    |
| 10.0E-6                                |                        | 99.09    |
| <b>CEPHRADINE</b>                      |                        |          |
| 10.0E-9                                |                        | 109.78   |
| 100.0E-9                               |                        | 89.05    |
| 1.0E-6                                 |                        | 105.68   |
| 10.0E-6                                |                        | 94.91    |
| <b>CETIRIZINE HYDROCHLORIDE</b>        |                        |          |
| 10.0E-9                                |                        | 1.94     |
| 100.0E-9                               |                        | 101.80   |
| 1.0E-6                                 |                        | 100.07   |
| 10.0E-6                                |                        | 45.26    |
| <b>CETRIMONIUM BROMIDE</b>             |                        |          |
| 10.0E-9                                |                        | 121.62   |
| 100.0E-9                               |                        | 108.77   |
| 1.0E-6                                 |                        | 86.47    |
| 10.0E-6                                |                        | 1.10     |
| <b>CETYLPYRIDINIUM CHLORIDE</b>        |                        |          |
| 10.0E-9                                |                        | 82.28    |
| 100.0E-9                               |                        | 81.12    |
| 1.0E-6                                 |                        | 53.26    |
| 10.0E-6                                |                        | 1.05     |
| <b>CEVADINE</b>                        |                        |          |
| 10.0E-9                                |                        | 129.40   |
| 100.0E-9                               |                        | 131.24   |
| 1.0E-6                                 |                        | 122.80   |
| 10.0E-6                                |                        | 124.60   |
| <b>CHAULMOOGRIC ACID</b>               |                        |          |
| 10.0E-9                                |                        | 93.49    |
| 100.0E-9                               |                        | 95.27    |
| 1.0E-6                                 |                        | 95.14    |
| 10.0E-6                                |                        | 98.44    |
| <b>CHAULMOSULFONE</b>                  |                        |          |
| 10.0E-9                                |                        | 132.30   |
| 100.0E-9                               |                        | 111.64   |
| 1.0E-6                                 |                        | 102.89   |
| 10.0E-6                                |                        | 105.81   |
| <b>CHENODIOL</b>                       |                        |          |
| 10.0E-9                                |                        | 112.60   |
| 100.0E-9                               |                        | 102.38   |
| 1.0E-6                                 |                        | 94.79    |
| 10.0E-6                                |                        | 88.87    |
| <b>CHICAGO SKY BLUE</b>                |                        |          |
| 10.0E-9                                |                        | 120.25   |
| 100.0E-9                               |                        | 111.91   |
| 1.0E-6                                 |                        | 115.20   |
| 10.0E-6                                |                        | 92.20    |
| <b>CHINIOFON</b>                       |                        |          |
| 10.0E-9                                |                        | 97.78    |
| 100.0E-9                               |                        | 109.61   |
| 1.0E-6                                 |                        | 103.05   |
| 10.0E-6                                |                        | 98.84    |
| <b>CHLORALOSE</b>                      |                        |          |
| 10.0E-9                                |                        | 86.41    |
| 100.0E-9                               |                        | 83.66    |
| 1.0E-6                                 |                        | 77.84    |
| 10.0E-6                                |                        | 75.39    |
| <b>CHLORAMBUCIL</b>                    |                        |          |
| 10.0E-9                                |                        | 83.15    |
| 100.0E-9                               |                        | 86.74    |
| 1.0E-6                                 |                        | 54.13    |
| 10.0E-6                                |                        | 2.50     |
| <b>CHLORAMPHENICOL</b>                 |                        |          |
| 10.0E-9                                |                        | 80.96    |
| 100.0E-9                               |                        | 92.82    |
| 1.0E-6                                 |                        | 86.02    |
| 10.0E-6                                |                        | 60.40    |
| <b>CHLORAMPHENICOL HEMISUCCINATE</b>   |                        |          |
| 10.0E-9                                |                        | 81.85    |
| 100.0E-9                               |                        | 82.06    |
| 1.0E-6                                 |                        | 89.86    |
| 10.0E-6                                |                        | 72.57    |
| <b>CHLORAMPHENICOL PALMITATE</b>       |                        |          |
| 10.0E-9                                |                        | 81.58    |
| 100.0E-9                               |                        | 98.41    |
| 1.0E-6                                 |                        | 80.42    |
| 10.0E-6                                |                        | 77.77    |

| Compounds and Final Concentrations (M)   | Average of % Viability | Hits (✓) |
|------------------------------------------|------------------------|----------|
| <b>CHLORANIL</b>                         |                        |          |
| 10.0E-9                                  |                        | 122.20   |
| 100.0E-9                                 |                        | 141.21   |
| 1.0E-6                                   |                        | 124.25   |
| 10.0E-6                                  |                        | 127.34   |
| <b>CHLORCYCLIZINE HYDROCHLORIDE</b>      |                        |          |
| 10.0E-9                                  |                        | 76.79    |
| 100.0E-9                                 |                        | 83.17    |
| 1.0E-6                                   |                        | 80.49    |
| 10.0E-6                                  |                        | 66.14    |
| <b>CHLORHEXIDINE</b>                     |                        |          |
| 10.0E-9                                  |                        | 89.75    |
| 100.0E-9                                 |                        | 86.70    |
| 1.0E-6                                   |                        | 81.65    |
| 10.0E-6                                  |                        | 67.65    |
| <b>CHLORINDIONE</b>                      |                        |          |
| 10.0E-9                                  |                        | 96.20    |
| 100.0E-9                                 |                        | 103.78   |
| 1.0E-6                                   |                        | 119.97   |
| 10.0E-6                                  |                        | 105.69   |
| <b>CHLORMADINONE ACETATE</b>             |                        |          |
| 10.0E-9                                  |                        | 116.48   |
| 100.0E-9                                 |                        | 100.39   |
| 1.0E-6                                   |                        | 103.34   |
| 10.0E-6                                  |                        | 76.15    |
| <b>CHLORMEZANONE</b>                     |                        |          |
| 10.0E-9                                  |                        | 112.03   |
| 100.0E-9                                 |                        | 119.52   |
| 1.0E-6                                   |                        | 107.81   |
| 10.0E-6                                  |                        | 111.41   |
| <b>CHLOROACETOXYQUINOLINE</b>            |                        |          |
| 10.0E-9                                  |                        | 122.48   |
| 100.0E-9                                 |                        | 125.00   |
| 1.0E-6                                   |                        | 99.55    |
| 10.0E-6                                  |                        | 1.79     |
| <b>CHLOROCRESOL</b>                      |                        |          |
| 10.0E-9                                  |                        | 92.73    |
| 100.0E-9                                 |                        | 96.28    |
| 1.0E-6                                   |                        | 88.08    |
| 10.0E-6                                  |                        | 84.75    |
| <b>CHLOROGUANIDE HYDROCHLORIDE</b>       |                        |          |
| 10.0E-9                                  |                        | 104.72   |
| 100.0E-9                                 |                        | 110.13   |
| 1.0E-6                                   |                        | 100.07   |
| 10.0E-6                                  |                        | 56.13    |
| <b>CHLOROPHYLLIDE Cu COMPLEX Na SALT</b> |                        |          |
| 10.0E-9                                  |                        | 100.08   |
| 100.0E-9                                 |                        | 98.70    |
| 1.0E-6                                   |                        | 93.55    |
| 10.0E-6                                  |                        | 90.57    |
| <b>CHLOROPYRAMINE HYDROCHLORIDE</b>      |                        |          |
| 10.0E-9                                  |                        | 122.36   |
| 100.0E-9                                 |                        | 116.84   |
| 1.0E-6                                   |                        | 117.80   |
| 10.0E-6                                  |                        | 100.71   |
| <b>CHLOROQUINE DIPHOSPHATE</b>           |                        |          |
| 10.0E-9                                  |                        | 90.20    |
| 100.0E-9                                 |                        | 98.63    |
| 1.0E-6                                   |                        | 85.65    |
| 10.0E-6                                  |                        | 76.57    |
| <b>CHLOROTHIAZIDE</b>                    |                        |          |
| 10.0E-9                                  |                        | 83.95    |
| 100.0E-9                                 |                        | 84.08    |
| 1.0E-6                                   |                        | 93.97    |
| 10.0E-6                                  |                        | 98.00    |
| <b>CHLOROXINE</b>                        |                        |          |
| 10.0E-9                                  |                        | 130.12   |
| 100.0E-9                                 |                        | 101.94   |
| 1.0E-6                                   |                        | 100.94   |
| 10.0E-6                                  |                        | 85.23    |
| <b>CHLOROXYLENOL</b>                     |                        |          |
| 10.0E-9                                  |                        | 89.94    |
| 100.0E-9                                 |                        | 93.19    |
| 1.0E-6                                   |                        | 94.13    |
| 10.0E-6                                  |                        | 106.48   |
| <b>CHLORPHENIRAMINE (S) MALEATE</b>      |                        |          |
| 10.0E-9                                  |                        | 78.67    |
| 100.0E-9                                 |                        | 85.33    |
| 1.0E-6                                   |                        | 91.78    |
| 10.0E-6                                  |                        | 93.53    |

| Compounds and Final Concentrations (M) | Average of % Viability | Hits (✓) |
|----------------------------------------|------------------------|----------|
| <b>CHLORPROMAZINE</b>                  |                        |          |
| 10.0E-9                                |                        | 87.08    |
| 100.0E-9                               |                        | 91.32    |
| 1.0E-6                                 |                        | 102.72   |
| 10.0E-6                                |                        | 98.71    |
| <b>CHLORPROPAMIDE</b>                  |                        |          |
| 10.0E-9                                |                        | 95.54    |
| 100.0E-9                               |                        | 93.30    |
| 1.0E-6                                 |                        | 101.97   |
| 10.0E-6                                |                        | 102.88   |
| <b>CHLORPROTHIXENE HYDROCHLORIDE</b>   |                        |          |
| 10.0E-9                                |                        | 113.64   |
| 100.0E-9                               |                        | 107.82   |
| 1.0E-6                                 |                        | 98.98    |
| 10.0E-6                                |                        | 98.09    |
| <b>CHLORPYRIFOS</b>                    |                        |          |
| 10.0E-9                                |                        | 131.00   |
| 100.0E-9                               |                        | 117.72   |
| 1.0E-6                                 |                        | 122.48   |
| 10.0E-6                                |                        | 123.49   |
| <b>CHLORQUINALDOL</b>                  |                        |          |
| 10.0E-9                                |                        | 128.30   |
| 100.0E-9                               |                        | 136.86   |
| 1.0E-6                                 |                        | 125.99   |
| 10.0E-6                                |                        | 122.06   |
| <b>CHLORTETRACYCLINE HYDROCHLORIDE</b> |                        |          |
| 10.0E-9                                |                        | 88.59    |
| 100.0E-9                               |                        | 92.17    |
| 1.0E-6                                 |                        | 99.71    |
| 10.0E-6                                |                        | 83.69    |
| <b>CHLORTHALIDONE</b>                  |                        |          |
| 10.0E-9                                |                        | 83.56    |
| 100.0E-9                               |                        | 96.18    |
| 1.0E-6                                 |                        | 98.02    |
| 10.0E-6                                |                        | 102.23   |
| <b>CHLORZOXAZONE</b>                   |                        |          |
| 10.0E-9                                |                        | 90.85    |
| 100.0E-9                               |                        | 92.97    |
| 1.0E-6                                 |                        | 107.14   |
| 10.0E-6                                |                        | 102.83   |
| <b>CHOL-11-ENIC ACID</b>               |                        |          |
| 10.0E-9                                |                        | 103.76   |
| 100.0E-9                               |                        | 94.63    |
| 1.0E-6                                 |                        | 104.83   |
| 10.0E-6                                |                        | 108.41   |
| <b>CHOLECALCIFEROL</b>                 |                        |          |
| 10.0E-9                                |                        | 111.35   |
| 100.0E-9                               |                        | 95.57    |
| 1.0E-6                                 |                        | 88.50    |
| 10.0E-6                                |                        | 63.59    |
| <b>CHOLEST-4,6-DIEN-3-ONE</b>          |                        |          |
| 10.0E-9                                |                        | 93.30    |
| 100.0E-9                               |                        | 102.55   |
| 1.0E-6                                 |                        | 110.49   |
| 10.0E-6                                |                        | 52.42    |
| <b>CHOLEST-5-EN-3-ONE</b>              |                        |          |
| 10.0E-9                                |                        | 97.16    |
| 100.0E-9                               |                        | 105.62   |
| 1.0E-6                                 |                        | 120.62   |
| 10.0E-6                                |                        | 112.91   |
| <b>CHOLESTAN-3-ONE</b>                 |                        |          |
| 10.0E-9                                |                        | 135.98   |
| 100.0E-9                               |                        | 122.92   |
| 1.0E-6                                 |                        | 115.33   |
| 10.0E-6                                |                        | 119.17   |
| <b>CHOLESTANE</b>                      |                        |          |
| 10.0E-9                                |                        | 111.55   |
| 100.0E-9                               |                        | 121.53   |
| 1.0E-6                                 |                        | 127.29   |
| 10.0E-6                                |                        | 110.17   |
| <b>CHOLESTEROL</b>                     |                        |          |
| 10.0E-9                                |                        | 115.37   |
| 100.0E-9                               |                        | 105.02   |
| 1.0E-6                                 |                        | 89.62    |
| 10.0E-6                                |                        | 103.49   |
| <b>CHOLIC ACID</b>                     |                        |          |
| 10.0E-9                                |                        | 108.49   |
| 100.0E-9                               |                        | 117.81   |
| 1.0E-6                                 |                        | 121.56   |
| 10.0E-6                                |                        | 113.55   |

| Compounds and Final Concentrations (M) | Average of % Viability | Hits (✓) |
|----------------------------------------|------------------------|----------|
| <b>CHOLIC ACID, METHYL ESTER</b>       |                        |          |
| 10.0E-9                                |                        | 98.59    |
| 100.0E-9                               |                        | 99.22    |
| 1.0E-6                                 |                        | 109.18   |
| 10.0E-6                                |                        | 108.34   |
| <b>CHOLINE CHLORIDE</b>                |                        |          |
| 10.0E-9                                |                        | 111.76   |
| 100.0E-9                               |                        | 121.64   |
| 1.0E-6                                 |                        | 119.43   |
| 10.0E-6                                |                        | 101.51   |
| <b>CHROMOCARB</b>                      |                        |          |
| 10.0E-9                                |                        | 85.63    |
| 100.0E-9                               |                        | 77.31    |
| 1.0E-6                                 |                        | 86.73    |
| 10.0E-6                                |                        | 75.68    |
| <b>CHRYSANTHEMIC ACID</b>              |                        |          |
| 10.0E-9                                |                        | 99.46    |
| 100.0E-9                               |                        | 111.01   |
| 1.0E-6                                 |                        | 104.82   |
| 10.0E-6                                |                        | 106.02   |
| <b>CHRYSANTHEMIC ACID, ETHYL ESTER</b> |                        |          |
| 10.0E-9                                |                        | 115.92   |
| 100.0E-9                               |                        | 134.40   |
| 1.0E-6                                 |                        | 109.71   |
| 10.0E-6                                |                        | 111.63   |
| <b>CHRYSANTHEMYL ALCOHOL</b>           |                        |          |
| 10.0E-9                                |                        | 105.20   |
| 100.0E-9                               |                        | 103.90   |
| 1.0E-6                                 |                        | 91.40    |
| 10.0E-6                                |                        | 77.71    |
| <b>CHRYSAROBIN</b>                     |                        |          |
| 10.0E-9                                |                        | 94.73    |
| 100.0E-9                               |                        | 97.76    |
| 1.0E-6                                 |                        | 89.75    |
| 10.0E-6                                |                        | 93.79    |
| <b>CHRYSIN</b>                         |                        |          |
| 10.0E-9                                |                        | 101.69   |
| 100.0E-9                               |                        | 112.08   |
| 1.0E-6                                 |                        | 112.54   |
| 10.0E-6                                |                        | 96.70    |
| <b>CHRYSIN DIMETHYL ETHER</b>          |                        |          |
| 10.0E-9                                |                        | 124.12   |
| 100.0E-9                               |                        | 94.46    |
| 1.0E-6                                 |                        | 99.50    |
| 10.0E-6                                |                        | 72.49    |
| <b>CHRYSOPHANOL</b>                    |                        |          |
| 10.0E-9                                |                        | 119.42   |
| 100.0E-9                               |                        | 116.30   |
| 1.0E-6                                 |                        | 116.26   |
| 10.0E-6                                |                        | 115.43   |
| <b>CHUKRASIN METHYL ETHER</b>          |                        |          |
| 10.0E-9                                |                        | 91.40    |
| 100.0E-9                               |                        | 102.10   |
| 1.0E-6                                 |                        | 100.46   |
| 10.0E-6                                |                        | 71.26    |
| <b>CICLOPIROX OLAMINE</b>              |                        |          |
| 10.0E-9                                |                        | 94.00    |
| 100.0E-9                               |                        | 86.80    |
| 1.0E-6                                 |                        | 107.94   |
| 10.0E-6                                |                        | 0.63     |
| <b>CILOSTAZOL</b>                      |                        |          |
| 10.0E-9                                |                        | 112.44   |
| 100.0E-9                               |                        | 108.13   |
| 1.0E-6                                 |                        | 107.72   |
| 10.0E-6                                |                        | 91.93    |
| <b>CIMETIDINE</b>                      |                        |          |
| 10.0E-9                                |                        | 116.45   |
| 100.0E-9                               |                        | 114.34   |
| 1.0E-6                                 |                        | 96.68    |
| 10.0E-6                                |                        | 116.01   |
| <b>CINCHONIDINE</b>                    |                        |          |
| 10.0E-9                                |                        | 108.19   |
| 100.0E-9                               |                        | 94.55    |
| 1.0E-6                                 |                        | 85.25    |
| 10.0E-6                                |                        | 94.36    |
| <b>CINCHONINE</b>                      |                        |          |
| 10.0E-9                                |                        | 127.57   |
| 100.0E-9                               |                        | 100.19   |
| 1.0E-6                                 |                        | 89.84    |
| 10.0E-6                                |                        | 105.04   |

| Compounds and Final Concentrations (M) | Average of % Viability | Hits (✓) |
|----------------------------------------|------------------------|----------|
| <b>CINCHOPHEN</b>                      |                        |          |
| 10.0E-9                                |                        | 93.38    |
| 100.0E-9                               |                        | 80.50    |
| 1.0E-6                                 |                        | 88.94    |
| 10.0E-6                                |                        | 75.71    |
| <b>CINNARAZINE</b>                     |                        |          |
| 10.0E-9                                |                        | 117.09   |
| 100.0E-9                               |                        | 103.43   |
| 1.0E-6                                 |                        | 105.75   |
| 10.0E-6                                |                        | 95.63    |
| <b>CINOXACIN</b>                       |                        |          |
| 10.0E-9                                |                        | 89.54    |
| 100.0E-9                               |                        | 76.99    |
| 1.0E-6                                 |                        | 95.57    |
| 10.0E-6                                |                        | 95.51    |
| <b>CIPROFLOXACIN</b>                   |                        |          |
| 10.0E-9                                |                        | 121.52   |
| 100.0E-9                               |                        | 102.22   |
| 1.0E-6                                 |                        | 106.12   |
| 10.0E-6                                |                        | 112.32   |
| <b>CISPLATIN</b>                       |                        |          |
| 10.0E-9                                |                        | 109.92   |
| 100.0E-9                               |                        | 110.75   |
| 1.0E-6                                 |                        | 106.04   |
| 10.0E-6                                |                        | 90.66    |
| <b>CITALOPRAM</b>                      |                        |          |
| 10.0E-9                                |                        | 93.54    |
| 100.0E-9                               |                        | 101.23   |
| 1.0E-6                                 |                        | 88.85    |
| 10.0E-6                                |                        | 68.10    |
| <b>CITICOLINE</b>                      |                        |          |
| 10.0E-9                                |                        | 115.47   |
| 100.0E-9                               |                        | 106.60   |
| 1.0E-6                                 |                        | 102.46   |
| 10.0E-6                                |                        | 107.42   |
| <b>CITIOLONE</b>                       |                        |          |
| 10.0E-9                                |                        | 132.14   |
| 100.0E-9                               |                        | 124.18   |
| 1.0E-6                                 |                        | 105.94   |
| 10.0E-6                                |                        | 112.49   |
| <b>CITRININ</b>                        |                        |          |
| 10.0E-9                                |                        | 128.80   |
| 100.0E-9                               |                        | 128.95   |
| 1.0E-6                                 |                        | 119.32   |
| 10.0E-6                                |                        | 112.45   |
| <b>CITROPTEN</b>                       |                        |          |
| 10.0E-9                                |                        | 115.53   |
| 100.0E-9                               |                        | 119.66   |
| 1.0E-6                                 |                        | 116.50   |
| 10.0E-6                                |                        | 99.18    |
| <b>CITRULLINE</b>                      |                        |          |
| 10.0E-9                                |                        | 101.74   |
| 100.0E-9                               |                        | 108.74   |
| 1.0E-6                                 |                        | 115.33   |
| 10.0E-6                                |                        | 106.33   |
| <b>CLARITHROMYCIN</b>                  |                        |          |
| 10.0E-9                                |                        | 106.54   |
| 100.0E-9                               |                        | 104.89   |
| 1.0E-6                                 |                        | 105.21   |
| 10.0E-6                                |                        | 90.58    |
| <b>CLAVULANATE LITHIUM</b>             |                        |          |
| 10.0E-9                                |                        | 117.49   |
| 100.0E-9                               |                        | 111.39   |
| 1.0E-6                                 |                        | 105.67   |
| 10.0E-6                                |                        | 114.33   |
| <b>CLEMASTINE</b>                      |                        |          |
| 10.0E-9                                |                        | 82.04    |
| 100.0E-9                               |                        | 86.21    |
| 1.0E-6                                 |                        | 77.98    |
| 10.0E-6                                |                        | 80.42    |
| <b>CLEMIZOLE HYDROCHLORIDE</b>         |                        |          |
| 10.0E-9                                |                        | 84.68    |
| 100.0E-9                               |                        | 98.80    |
| 1.0E-6                                 |                        | 99.64    |
| 10.0E-6                                |                        | 90.53    |
| <b>CLENBUTEROL HYDROCHLORIDE</b>       |                        |          |
| 10.0E-9                                |                        | 110.34   |
| 100.0E-9                               |                        | 114.11   |
| 1.0E-6                                 |                        | 111.54   |
| 10.0E-6                                |                        | 104.24   |

| Compounds and Final Concentrations (M)     | Average of % Viability | Hits (✓) |
|--------------------------------------------|------------------------|----------|
| <b>CLIDINIUM BROMIDE</b>                   |                        |          |
| 10.0E-9                                    |                        | 104.30   |
| 100.0E-9                                   |                        | 110.00   |
| 1.0E-6                                     |                        | 96.01    |
| 10.0E-6                                    |                        | 112.29   |
| <b>CLINDAMYCIN HYDROCHLORIDE</b>           |                        |          |
| 10.0E-9                                    |                        | 107.69   |
| 100.0E-9                                   |                        | 101.12   |
| 1.0E-6                                     |                        | 96.20    |
| 10.0E-6                                    |                        | 97.34    |
| <b>CLINDAMYCIN PALMITATE HYDROCHLORIDE</b> |                        |          |
| 10.0E-9                                    |                        | 135.30   |
| 100.0E-9                                   |                        | 136.03   |
| 1.0E-6                                     |                        | 113.26   |
| 10.0E-6                                    |                        | 122.00   |
| <b>CLOQUINOL</b>                           |                        |          |
| 10.0E-9                                    |                        | 103.82   |
| 100.0E-9                                   |                        | 113.15   |
| 1.0E-6                                     |                        | 111.25   |
| 10.0E-6                                    |                        | 98.08    |
| <b>CLOBETASOL PROPIONATE</b>               |                        |          |
| 10.0E-9                                    |                        | 111.23   |
| 100.0E-9                                   |                        | 102.11   |
| 1.0E-6                                     |                        | 105.94   |
| 10.0E-6                                    |                        | 80.57    |
| <b>CLOFAZIMINE</b>                         |                        |          |
| 10.0E-9                                    |                        | 99.16    |
| 100.0E-9                                   |                        | 98.44    |
| 1.0E-6                                     |                        | 61.70    |
| 10.0E-6                                    |                        | 52.72    |
| <b>CLOFIBRATE</b>                          |                        |          |
| 10.0E-9                                    |                        | 128.50   |
| 100.0E-9                                   |                        | 116.73   |
| 1.0E-6                                     |                        | 117.61   |
| 10.0E-6                                    |                        | 109.38   |
| <b>CLOFIBRIC ACID</b>                      |                        |          |
| 10.0E-9                                    |                        | 97.96    |
| 100.0E-9                                   |                        | 101.02   |
| 1.0E-6                                     |                        | 55.66    |
| 10.0E-6                                    |                        | 1.74     |
| <b>CLOFOCTOL</b>                           |                        |          |
| 10.0E-9                                    |                        | 103.06   |
| 100.0E-9                                   |                        | 103.12   |
| 1.0E-6                                     |                        | 98.08    |
| 10.0E-6                                    |                        | 11.72    |
| <b>CLOMIPHENE CITRATE</b>                  |                        |          |
| 10.0E-9                                    |                        | 116.54   |
| 100.0E-9                                   |                        | 113.01   |
| 1.0E-6                                     |                        | 95.76    |
| 10.0E-6                                    |                        | 73.72    |
| <b>CLOMIPRAMINE HYDROCHLORIDE</b>          |                        |          |
| 10.0E-9                                    |                        | 113.28   |
| 100.0E-9                                   |                        | 91.38    |
| 1.0E-6                                     |                        | 104.33   |
| 10.0E-6                                    |                        | 77.63    |
| <b>CLONIDINE HYDROCHLORIDE</b>             |                        |          |
| 10.0E-9                                    |                        | 114.70   |
| 100.0E-9                                   |                        | 103.25   |
| 1.0E-6                                     |                        | 99.87    |
| 10.0E-6                                    |                        | 99.48    |
| <b>CLOPERASTINE HYDROCHLORIDE</b>          |                        |          |
| 10.0E-9                                    |                        | 111.09   |
| 100.0E-9                                   |                        | 112.69   |
| 1.0E-6                                     |                        | 114.45   |
| 10.0E-6                                    |                        | 97.18    |
| <b>CLOPIDOGREL SULFATE</b>                 |                        |          |
| 10.0E-9                                    |                        | 129.41   |
| 100.0E-9                                   |                        | 125.57   |
| 1.0E-6                                     |                        | 107.30   |
| 10.0E-6                                    |                        | 107.42   |
| <b>CLOPIDOL</b>                            |                        |          |
| 10.0E-9                                    |                        | 121.45   |
| 100.0E-9                                   |                        | 98.68    |
| 1.0E-6                                     |                        | 98.57    |
| 10.0E-6                                    |                        | 90.96    |
| <b>CLORGILINE HYDROCHLORIDE</b>            |                        |          |
| 10.0E-9                                    |                        | 93.08    |
| 100.0E-9                                   |                        | 90.77    |
| 1.0E-6                                     |                        | 87.23    |
| 10.0E-6                                    |                        | 85.95    |

| Compounds and Final Concentrations (M)                            | Average of % Viability | Hits (✓) |
|-------------------------------------------------------------------|------------------------|----------|
| <b>CLORSULON</b>                                                  |                        |          |
| 10.0E-9                                                           |                        | 121.38   |
| 100.0E-9                                                          |                        | 115.44   |
| 1.0E-6                                                            |                        | 115.07   |
| 10.0E-6                                                           |                        | 117.59   |
| <b>CLOTRIMAZOLE</b>                                               |                        |          |
| 10.0E-9                                                           |                        | 97.77    |
| 100.0E-9                                                          |                        | 98.49    |
| 1.0E-6                                                            |                        | 97.00    |
| 10.0E-6                                                           |                        | 93.52    |
| <b>CLOVANEDIOL DIACETATE</b>                                      |                        |          |
| 10.0E-9                                                           |                        | 133.65   |
| 100.0E-9                                                          |                        | 122.33   |
| 1.0E-6                                                            |                        | 102.76   |
| 10.0E-6                                                           |                        | 77.37    |
| <b>CLOXACILLIN SODIUM</b>                                         |                        |          |
| 10.0E-9                                                           |                        | 105.41   |
| 100.0E-9                                                          |                        | 99.34    |
| 1.0E-6                                                            |                        | 101.33   |
| 10.0E-6                                                           |                        | 105.45   |
| <b>CLOXYQUIN</b>                                                  |                        |          |
| 10.0E-9                                                           |                        | 102.42   |
| 100.0E-9                                                          |                        | 90.64    |
| 1.0E-6                                                            |                        | 102.98   |
| 10.0E-6                                                           |                        | 95.06    |
| <b>CLOZAPINE</b>                                                  |                        |          |
| 10.0E-9                                                           |                        | 117.80   |
| 100.0E-9                                                          |                        | 102.12   |
| 1.0E-6                                                            |                        | 103.88   |
| 10.0E-6                                                           |                        | 118.16   |
| <b>COENZYME B12</b>                                               |                        |          |
| 10.0E-9                                                           |                        | 121.99   |
| 100.0E-9                                                          |                        | 100.63   |
| 1.0E-6                                                            |                        | 56.74    |
| 10.0E-6                                                           |                        | 7.86     |
| <b>COLCHICINE</b>                                                 |                        |          |
| 10.0E-9                                                           |                        | 104.62   |
| 100.0E-9                                                          |                        | 1.56     |
| 1.0E-6                                                            |                        | 3.00     |
| 10.0E-6                                                           |                        | 3.81     |
| <b>COLESEVALAM HYDROCHLORIDE (high mol wt copolymer @10mg/ml)</b> |                        |          |
| 10.0E-9                                                           |                        | 114.69   |
| 100.0E-9                                                          |                        | 95.87    |
| 1.0E-6                                                            |                        | 103.68   |
| 10.0E-6                                                           |                        | 97.15    |
| <b>COLFORSIN</b>                                                  |                        |          |
| 10.0E-9                                                           |                        | 117.02   |
| 100.0E-9                                                          |                        | 111.23   |
| 1.0E-6                                                            |                        | 109.48   |
| 10.0E-6                                                           |                        | 116.59   |
| <b>COLISTIMETHATE SODIUM</b>                                      |                        |          |
| 10.0E-9                                                           |                        | 103.87   |
| 100.0E-9                                                          |                        | 76.19    |
| 1.0E-6                                                            |                        | 120.07   |
| 10.0E-6                                                           |                        | 112.59   |
| <b>COLISTIN SULFATE</b>                                           |                        |          |
| 10.0E-9                                                           |                        | 118.42   |
| 100.0E-9                                                          |                        | 124.70   |
| 1.0E-6                                                            |                        | 114.48   |
| 10.0E-6                                                           |                        | 114.04   |
| <b>CONESSINE</b>                                                  |                        |          |
| 10.0E-9                                                           |                        | 97.20    |
| 100.0E-9                                                          |                        | 96.11    |
| 1.0E-6                                                            |                        | 91.63    |
| 10.0E-6                                                           |                        | 57.28    |
| <b>CONVALLATOXIN</b>                                              |                        |          |
| 10.0E-9                                                           |                        | 120.47   |
| 100.0E-9                                                          |                        | 1.60     |
| 1.0E-6                                                            |                        | 2.03     |
| 10.0E-6                                                           |                        | 2.01     |
| <b>CORALYNE CHLORIDE</b>                                          |                        |          |
| 10.0E-9                                                           |                        | 104.46   |
| 100.0E-9                                                          |                        | 109.26   |
| 1.0E-6                                                            |                        | 108.64   |
| 10.0E-6                                                           |                        | 61.67    |
| <b>CORTISONE</b>                                                  |                        |          |
| 10.0E-9                                                           |                        | 126.87   |
| 100.0E-9                                                          |                        | 101.78   |
| 1.0E-6                                                            |                        | 111.57   |
| 10.0E-6                                                           |                        | 100.93   |



| Compounds and Final Concentrations (M) | Average of % Viability | Hits (✓) |
|----------------------------------------|------------------------|----------|
| <b>CORTISONE ACETATE</b>               |                        |          |
| 10.0E-9                                |                        | 109.64   |
| 100.0E-9                               |                        | 109.98   |
| 1.0E-6                                 |                        | 75.86    |
| 10.0E-6                                |                        | 84.59    |
| <b>CORYNANTHINE</b>                    |                        |          |
| 10.0E-9                                |                        | 113.41   |
| 100.0E-9                               |                        | 111.88   |
| 1.0E-6                                 |                        | 107.87   |
| 10.0E-6                                |                        | 109.32   |
| <b>COTARNINE CHLORIDE</b>              |                        |          |
| 10.0E-9                                |                        | 127.81   |
| 100.0E-9                               |                        | 131.11   |
| 1.0E-6                                 |                        | 109.51   |
| 10.0E-6                                |                        | 111.48   |
| <b>COTININE</b>                        |                        |          |
| 10.0E-9                                |                        | 113.58   |
| 100.0E-9                               |                        | 106.13   |
| 1.0E-6                                 |                        | 99.54    |
| 10.0E-6                                |                        | 99.33    |
| <b>COUMARIN</b>                        |                        |          |
| 10.0E-9                                |                        | 112.46   |
| 100.0E-9                               |                        | 127.14   |
| 1.0E-6                                 |                        | 122.06   |
| 10.0E-6                                |                        | 96.01    |
| <b>CREATININE</b>                      |                        |          |
| 10.0E-9                                |                        | 119.34   |
| 100.0E-9                               |                        | 133.97   |
| 1.0E-6                                 |                        | 113.39   |
| 10.0E-6                                |                        | 121.77   |
| <b>CRESOL</b>                          |                        |          |
| 10.0E-9                                |                        | 109.08   |
| 100.0E-9                               |                        | 99.83    |
| 1.0E-6                                 |                        | 91.30    |
| 10.0E-6                                |                        | 59.62    |
| <b>CRESOPIRINE</b>                     |                        |          |
| 10.0E-9                                |                        | 128.75   |
| 100.0E-9                               |                        | 117.35   |
| 1.0E-6                                 |                        | 103.96   |
| 10.0E-6                                |                        | 105.54   |
| <b>CROMOLYN SODIUM</b>                 |                        |          |
| 10.0E-9                                |                        | 124.89   |
| 100.0E-9                               |                        | 99.75    |
| 1.0E-6                                 |                        | 97.06    |
| 10.0E-6                                |                        | 98.61    |
| <b>CROTAMITON</b>                      |                        |          |
| 10.0E-9                                |                        | 104.71   |
| 100.0E-9                               |                        | 100.82   |
| 1.0E-6                                 |                        | 93.41    |
| 10.0E-6                                |                        | 75.40    |
| <b>CRUSTECDYSONE</b>                   |                        |          |
| 10.0E-9                                |                        | 111.14   |
| 100.0E-9                               |                        | 120.93   |
| 1.0E-6                                 |                        | 161.96   |
| 10.0E-6                                |                        | 138.66   |
| <b>CRYPTOTANSHINONE</b>                |                        |          |
| 10.0E-9                                |                        | 110.27   |
| 100.0E-9                               |                        | 114.70   |
| 1.0E-6                                 |                        | 111.80   |
| 10.0E-6                                |                        | 77.55    |
| <b>CURCUMIN</b>                        |                        |          |
| 10.0E-9                                |                        | 114.96   |
| 100.0E-9                               |                        | 115.05   |
| 1.0E-6                                 |                        | 105.46   |
| 10.0E-6                                |                        | 40.97    |
| <b>CYCLANDELATE</b>                    |                        |          |
| 10.0E-9                                |                        | 122.98   |
| 100.0E-9                               |                        | 123.41   |
| 1.0E-6                                 |                        | 111.68   |
| 10.0E-6                                |                        | 94.67    |
| <b>CYCLIZINE</b>                       |                        |          |
| 10.0E-9                                |                        | 127.41   |
| 100.0E-9                               |                        | 110.02   |
| 1.0E-6                                 |                        | 87.88    |
| 10.0E-6                                |                        | 95.84    |
| <b>CYCLOBENZAPRINE HYDROCHLORIDE</b>   |                        |          |
| 10.0E-9                                |                        | 105.51   |
| 100.0E-9                               |                        | 98.65    |
| 1.0E-6                                 |                        | 88.13    |
| 10.0E-6                                |                        | 99.97    |

| Compounds and Final Concentrations (M) | Average of % Viability | Hits (✓) |
|----------------------------------------|------------------------|----------|
| <b>CYCLOCREATINE</b>                   |                        |          |
| 10.0E-9                                |                        | 121.72   |
| 100.0E-9                               |                        | 117.58   |
| 1.0E-6                                 |                        | 118.38   |
| 10.0E-6                                |                        | 115.07   |
| <b>CYCLOHEXIMIDE</b>                   |                        |          |
| 10.0E-9                                |                        | 112.87   |
| 100.0E-9                               |                        | 113.00   |
| 1.0E-6                                 |                        | 100.74   |
| 10.0E-6                                |                        | 11.16    |
| <b>CYCLOLEUCINE</b>                    |                        |          |
| 10.0E-9                                |                        | 125.40   |
| 100.0E-9                               |                        | 127.76   |
| 1.0E-6                                 |                        | 118.55   |
| 10.0E-6                                |                        | 120.07   |
| <b>CYCLOPENTOLATE HYDROCHLORIDE</b>    |                        |          |
| 10.0E-9                                |                        | 112.53   |
| 100.0E-9                               |                        | 104.32   |
| 1.0E-6                                 |                        | 99.31    |
| 10.0E-6                                |                        | 109.98   |
| <b>CYCLOPHOSPHAMIDE HYDRATE</b>        |                        |          |
| 10.0E-9                                |                        | 109.04   |
| 100.0E-9                               |                        | 121.43   |
| 1.0E-6                                 |                        | 104.85   |
| 10.0E-6                                |                        | 106.25   |
| <b>CYCLOSERINE</b>                     |                        |          |
| 10.0E-9                                |                        | 108.12   |
| 100.0E-9                               |                        | 86.83    |
| 1.0E-6                                 |                        | 93.40    |
| 10.0E-6                                |                        | 106.04   |
| <b>CYCLOSPORINE</b>                    |                        |          |
| 10.0E-9                                |                        | 95.81    |
| 100.0E-9                               |                        | 81.47    |
| 1.0E-6                                 |                        | 62.00    |
| 10.0E-6                                |                        | 27.25    |
| <b>CYCLOTHIAZIDE</b>                   |                        |          |
| 10.0E-9                                |                        | 105.82   |
| 100.0E-9                               |                        | 104.94   |
| 1.0E-6                                 |                        | 114.21   |
| 10.0E-6                                |                        | 114.53   |
| <b>CYCLOVERATRYLENE</b>                |                        |          |
| 10.0E-9                                |                        | 127.84   |
| 100.0E-9                               |                        | 134.80   |
| 1.0E-6                                 |                        | 124.33   |
| 10.0E-6                                |                        | 120.52   |
| <b>CYPERMETHRIN</b>                    |                        |          |
| 10.0E-9                                |                        | 119.36   |
| 100.0E-9                               |                        | 118.96   |
| 1.0E-6                                 |                        | 108.77   |
| 10.0E-6                                |                        | 108.17   |
| <b>CYPROHEPTADINE HYDROCHLORIDE</b>    |                        |          |
| 10.0E-9                                |                        | 109.56   |
| 100.0E-9                               |                        | 101.26   |
| 1.0E-6                                 |                        | 100.10   |
| 10.0E-6                                |                        | 94.87    |
| <b>CYPROTERONE ACETATE</b>             |                        |          |
| 10.0E-9                                |                        | 110.80   |
| 100.0E-9                               |                        | 88.48    |
| 1.0E-6                                 |                        | 91.18    |
| 10.0E-6                                |                        | 103.49   |
| <b>CYSTEAMINE HYDROCHLORIDE</b>        |                        |          |
| 10.0E-9                                |                        | 105.38   |
| 100.0E-9                               |                        | 107.73   |
| 1.0E-6                                 |                        | 110.06   |
| 10.0E-6                                |                        | 93.24    |
| <b>CYSTEINE HYDROCHLORIDE</b>          |                        |          |
| 10.0E-9                                |                        | 133.32   |
| 100.0E-9                               |                        | 118.22   |
| 1.0E-6                                 |                        | 99.50    |
| 10.0E-6                                |                        | 98.72    |
| <b>CYSTINE</b>                         |                        |          |
| 10.0E-9                                |                        | 79.32    |
| 100.0E-9                               |                        | 87.97    |
| 1.0E-6                                 |                        | 76.98    |
| 10.0E-6                                |                        | 75.76    |
| <b>CYTARABINE</b>                      |                        |          |
| 10.0E-9                                |                        | 100.89   |
| 100.0E-9                               |                        | 8.21     |
| 1.0E-6                                 |                        | 1.88     |
| 10.0E-6                                |                        | 1.74     |

| Compounds and Final Concentrations (M)    | Average of % Viability | Hits (✓) |
|-------------------------------------------|------------------------|----------|
| <b>CYTIDINE</b>                           |                        |          |
| 10.0E-9                                   |                        | 94.36    |
| 100.0E-9                                  |                        | 97.19    |
| 1.0E-6                                    |                        | 100.97   |
| 10.0E-6                                   |                        | 78.43    |
| <b>CYTISINE</b>                           |                        |          |
| 10.0E-9                                   |                        | 113.71   |
| 100.0E-9                                  |                        | 112.47   |
| 1.0E-6                                    |                        | 101.90   |
| 10.0E-6                                   |                        | 105.49   |
| <b>d,l-threo-3-HYDROXYASPARTIC ACID</b>   |                        |          |
| 10.0E-9                                   |                        | 109.00   |
| 100.0E-9                                  |                        | 131.22   |
| 1.0E-6                                    |                        | 113.60   |
| 10.0E-6                                   |                        | 115.18   |
| <b>DACARBAZINE</b>                        |                        |          |
| 10.0E-9                                   |                        | 116.94   |
| 100.0E-9                                  |                        | 106.34   |
| 1.0E-6                                    |                        | 83.59    |
| 10.0E-6                                   |                        | 85.98    |
| <b>DACTINOMYCIN</b>                       |                        |          |
| 10.0E-9                                   |                        | 20.26    |
| 100.0E-9                                  |                        | 1.32     |
| 1.0E-6                                    |                        | 0.36     |
| 10.0E-6                                   |                        | 0.07     |
| <b>DALBERGIONE</b>                        |                        |          |
| 10.0E-9                                   |                        | 128.22   |
| 100.0E-9                                  |                        | 121.62   |
| 1.0E-6                                    |                        | 110.04   |
| 10.0E-6                                   |                        | 3.43     |
| <b>DALBERGIONE, 4-METHOXY-4'-HYDROXY-</b> |                        |          |
| 10.0E-9                                   |                        | 123.63   |
| 100.0E-9                                  |                        | 124.74   |
| 1.0E-6                                    |                        | 113.72   |
| 10.0E-6                                   |                        | 6.06     |
| <b>DANAZOL</b>                            |                        |          |
| 10.0E-9                                   |                        | 130.26   |
| 100.0E-9                                  |                        | 107.58   |
| 1.0E-6                                    |                        | 106.01   |
| 10.0E-6                                   |                        | 88.12    |
| <b>DANTHRON</b>                           |                        |          |
| 10.0E-9                                   |                        | 100.35   |
| 100.0E-9                                  |                        | 101.00   |
| 1.0E-6                                    |                        | 100.86   |
| 10.0E-6                                   |                        | 77.61    |
| <b>DANTROLENE SODIUM</b>                  |                        |          |
| 10.0E-9                                   |                        | 106.79   |
| 100.0E-9                                  |                        | 113.65   |
| 1.0E-6                                    |                        | 107.59   |
| 10.0E-6                                   |                        | 102.84   |
| <b>DAPSONE</b>                            |                        |          |
| 10.0E-9                                   |                        | 118.49   |
| 100.0E-9                                  |                        | 102.75   |
| 1.0E-6                                    |                        | 88.11    |
| 10.0E-6                                   |                        | 92.23    |
| <b>DAUNORUBICIN</b>                       |                        |          |
| 10.0E-9                                   |                        | 90.52    |
| 100.0E-9                                  |                        | 2.81     |
| 1.0E-6                                    |                        | 1.44     |
| 10.0E-6                                   |                        | 0.10     |
| <b>DEACETOXY(7)-7-OXOKHIVORINIC ACID</b>  |                        |          |
| 10.0E-9                                   |                        | 116.37   |
| 100.0E-9                                  |                        | 118.89   |
| 1.0E-6                                    |                        | 116.92   |
| 10.0E-6                                   |                        | 123.45   |
| <b>DEACETOXY-7-OXOGEDUNIN</b>             |                        |          |
| 10.0E-9                                   |                        | 123.09   |
| 100.0E-9                                  |                        | 144.52   |
| 1.0E-6                                    |                        | 103.81   |
| 10.0E-6                                   |                        | 23.25    |
| <b>DEACETYLGEDUNIN</b>                    |                        |          |
| 10.0E-9                                   |                        | 109.37   |
| 100.0E-9                                  |                        | 117.01   |
| 1.0E-6                                    |                        | 107.47   |
| 10.0E-6                                   |                        | 49.46    |
| <b>DEBRISOQUIN SULFATE</b>                |                        |          |
| 10.0E-9                                   |                        | 106.83   |
| 100.0E-9                                  |                        | 100.83   |
| 1.0E-6                                    |                        | 98.24    |
| 10.0E-6                                   |                        | 98.58    |

| Compounds and Final Concentrations (M) | Average of % Viability | Hits (✓) |
|----------------------------------------|------------------------|----------|
| <b>DECAHYDROGAMBOGIC ACID</b>          |                        |          |
| 10.0E-9                                |                        | 95.04    |
| 100.0E-9                               |                        | 98.18    |
| 1.0E-6                                 |                        | 99.47    |
| 10.0E-6                                |                        | 42.87    |
| <b>DECAMETHONIUM BROMIDE</b>           |                        |          |
| 10.0E-9                                |                        | 115.95   |
| 100.0E-9                               |                        | 114.78   |
| 1.0E-6                                 |                        | 104.52   |
| 10.0E-6                                |                        | 105.69   |
| <b>DECOQUINATE</b>                     |                        |          |
| 10.0E-9                                |                        | 80.56    |
| 100.0E-9                               |                        | 89.18    |
| 1.0E-6                                 |                        | 82.10    |
| 10.0E-6                                |                        | 72.93    |
| <b>DEFERIPRONE</b>                     |                        |          |
| 10.0E-9                                |                        | 118.14   |
| 100.0E-9                               |                        | 99.66    |
| 1.0E-6                                 |                        | 100.60   |
| 10.0E-6                                |                        | 80.57    |
| <b>DEFEROXAMINE MESYLATE</b>           |                        |          |
| 10.0E-9                                |                        | 90.90    |
| 100.0E-9                               |                        | 72.54    |
| 1.0E-6                                 |                        | 102.12   |
| 10.0E-6                                |                        | 77.92    |
| <b>DEGUELIN(-)</b>                     |                        |          |
| 10.0E-9                                |                        | 122.50   |
| 100.0E-9                               |                        | 75.52    |
| 1.0E-6                                 |                        | 17.07    |
| 10.0E-6                                |                        | 7.58     |
| <b>DEHYDROBIETAMIDE</b>                |                        |          |
| 10.0E-9                                |                        | 116.58   |
| 100.0E-9                               |                        | 114.44   |
| 1.0E-6                                 |                        | 103.19   |
| 10.0E-6                                |                        | 96.29    |
| <b>DEHYDROCHOLIC ACID</b>              |                        |          |
| 10.0E-9                                |                        | 98.01    |
| 100.0E-9                               |                        | 40.20    |
| 1.0E-6                                 |                        | 108.04   |
| 10.0E-6                                |                        | 101.77   |
| <b>DEHYDRODIHYDROROTENONE</b>          |                        |          |
| 10.0E-9                                |                        | 145.59   |
| 100.0E-9                               |                        | 147.87   |
| 1.0E-6                                 |                        | 114.84   |
| 10.0E-6                                |                        | 120.51   |
| <b>DEHYDROROTENONE</b>                 |                        |          |
| 10.0E-9                                |                        | 118.85   |
| 100.0E-9                               |                        | 145.71   |
| 1.0E-6                                 |                        | 117.14   |
| 10.0E-6                                |                        | 121.43   |
| <b>DEHYDROVARIABILIN</b>               |                        |          |
| 10.0E-9                                |                        | 115.10   |
| 100.0E-9                               |                        | 132.89   |
| 1.0E-6                                 |                        | 112.42   |
| 10.0E-6                                |                        | 119.41   |
| <b>DEMECLOCYCLINE HYDROCHLORIDE</b>    |                        |          |
| 10.0E-9                                |                        | 114.23   |
| 100.0E-9                               |                        | 104.18   |
| 1.0E-6                                 |                        | 104.12   |
| 10.0E-6                                |                        | 77.51    |
| <b>DEMETHYLNIBLETIN</b>                |                        |          |
| 10.0E-9                                |                        | 114.20   |
| 100.0E-9                               |                        | 112.02   |
| 1.0E-6                                 |                        | 112.22   |
| 10.0E-6                                |                        | 116.66   |
| <b>DENATONIUM BENZOATE</b>             |                        |          |
| 10.0E-9                                |                        | 101.91   |
| 100.0E-9                               |                        | 95.28    |
| 1.0E-6                                 |                        | 96.44    |
| 10.0E-6                                |                        | 93.70    |
| <b>DEOXYADENOSINE</b>                  |                        |          |
| 10.0E-9                                |                        | 108.33   |
| 100.0E-9                               |                        | 103.79   |
| 1.0E-6                                 |                        | 103.78   |
| 10.0E-6                                |                        | 103.30   |
| <b>DEOXYCHOLIC ACID</b>                |                        |          |
| 10.0E-9                                |                        | 107.62   |
| 100.0E-9                               |                        | 123.38   |
| 1.0E-6                                 |                        | 122.55   |
| 10.0E-6                                |                        | 114.73   |

| Compounds and Final Concentrations (M)             | Average of % Viability | Hits (✓) |
|----------------------------------------------------|------------------------|----------|
| <b>DEOXYGEDUNIN</b>                                |                        |          |
| 10.0E-9                                            |                        | 142.61   |
| 100.0E-9                                           |                        | 131.15   |
| 1.0E-6                                             |                        | 102.62   |
| 10.0E-6                                            |                        | 16.56    |
| <b>DEOXYKHIVORIN</b>                               |                        |          |
| 10.0E-9                                            |                        | 129.01   |
| 100.0E-9                                           |                        | 145.86   |
| 1.0E-6                                             |                        | 119.40   |
| 10.0E-6                                            |                        | 104.66   |
| <b>DEOXSAPPANONE B 7,3'-DIMETHYL ETHER</b>         |                        |          |
| 10.0E-9                                            |                        | 107.76   |
| 100.0E-9                                           |                        | 135.30   |
| 1.0E-6                                             |                        | 111.61   |
| 10.0E-6                                            |                        | 109.88   |
| <b>DEOXSAPPANONE B 7,3'-DIMETHYL ETHER ACETATE</b> |                        |          |
| 10.0E-9                                            |                        | 126.00   |
| 100.0E-9                                           |                        | 130.83   |
| 1.0E-6                                             |                        | 120.01   |
| 10.0E-6                                            |                        | 1.46     |
| <b>DEOXSAPPANONE B 7,4'-DIMETHYL ETHER</b>         |                        |          |
| 10.0E-9                                            |                        | 117.79   |
| 100.0E-9                                           |                        | 135.76   |
| 1.0E-6                                             |                        | 17.93    |
| 10.0E-6                                            |                        | 1.00     |
| <b>DEOXSAPPANONE B TRIMETHYL ETHER</b>             |                        |          |
| 10.0E-9                                            |                        | 115.83   |
| 100.0E-9                                           |                        | 136.92   |
| 1.0E-6                                             |                        | 110.80   |
| 10.0E-6                                            |                        | 95.47    |
| <b>DEQUALINIUM CHLORIDE</b>                        |                        |          |
| 10.0E-9                                            |                        | 109.91   |
| 100.0E-9                                           |                        | 114.65   |
| 1.0E-6                                             |                        | 67.52    |
| 10.0E-6                                            |                        | 1.88     |
| <b>DERACOXIB</b>                                   |                        |          |
| 10.0E-9                                            |                        | 113.64   |
| 100.0E-9                                           |                        | 110.55   |
| 1.0E-6                                             |                        | 113.18   |
| 10.0E-6                                            |                        | 106.25   |
| <b>DERRUSNIN</b>                                   |                        |          |
| 10.0E-9                                            |                        | 133.54   |
| 100.0E-9                                           |                        | 133.57   |
| 1.0E-6                                             |                        | 121.73   |
| 10.0E-6                                            |                        | 98.70    |
| <b>DERRUSTONE</b>                                  |                        |          |
| 10.0E-9                                            |                        | 142.95   |
| 100.0E-9                                           |                        | 131.08   |
| 1.0E-6                                             |                        | 122.92   |
| 10.0E-6                                            |                        | 110.75   |
| <b>DESACETYL (7)KHIVORINIC ACID, METHYL ESTER</b>  |                        |          |
| 10.0E-9                                            |                        | 141.89   |
| 100.0E-9                                           |                        | 148.81   |
| 1.0E-6                                             |                        | 111.74   |
| 10.0E-6                                            |                        | 112.68   |
| <b>DESACETYLCOLFORSIN</b>                          |                        |          |
| 10.0E-9                                            |                        | 122.13   |
| 100.0E-9                                           |                        | 117.63   |
| 1.0E-6                                             |                        | 114.46   |
| 10.0E-6                                            |                        | 115.05   |
| <b>DESIPRAMINE HYDROCHLORIDE</b>                   |                        |          |
| 10.0E-9                                            |                        | 107.13   |
| 100.0E-9                                           |                        | 111.40   |
| 1.0E-6                                             |                        | 98.59    |
| 10.0E-6                                            |                        | 99.70    |
| <b>DESONIDE</b>                                    |                        |          |
| 10.0E-9                                            |                        | 91.21    |
| 100.0E-9                                           |                        | 94.74    |
| 1.0E-6                                             |                        | 102.27   |
| 10.0E-6                                            |                        | 101.19   |
| <b>DESOXYCORTICOSTERONE ACETATE</b>                |                        |          |
| 10.0E-9                                            |                        | 115.37   |
| 100.0E-9                                           |                        | 107.59   |
| 1.0E-6                                             |                        | 105.97   |
| 10.0E-6                                            |                        | 91.41    |
| <b>DESOXYMETASONE</b>                              |                        |          |
| 10.0E-9                                            |                        | 100.98   |
| 100.0E-9                                           |                        | 91.14    |
| 1.0E-6                                             |                        | 88.74    |
| 10.0E-6                                            |                        | 90.52    |

| Compounds and Final Concentrations (M) | Average of % Viability | Hits (✓) |
|----------------------------------------|------------------------|----------|
| <b>DESOXYPEGANINE HYDROCHLORIDE</b>    |                        |          |
| 10.0E-9                                |                        | 121.18   |
| 100.0E-9                               |                        | 127.31   |
| 1.0E-6                                 |                        | 120.76   |
| 10.0E-6                                |                        | 112.34   |
| <b>DEXAMETHASONE</b>                   |                        |          |
| 10.0E-9                                |                        | 121.07   |
| 100.0E-9                               |                        | 97.02    |
| 1.0E-6                                 |                        | 92.91    |
| 10.0E-6                                |                        | 97.00    |
| <b>DEXAMETHASONE ACETATE</b>           |                        |          |
| 10.0E-9                                |                        | 113.79   |
| 100.0E-9                               |                        | 92.28    |
| 1.0E-6                                 |                        | 105.90   |
| 10.0E-6                                |                        | 102.85   |
| <b>DEXAMETHASONE SODIUM PHOSPHATE</b>  |                        |          |
| 10.0E-9                                |                        | 90.91    |
| 100.0E-9                               |                        | 95.33    |
| 1.0E-6                                 |                        | 83.25    |
| 10.0E-6                                |                        | 81.38    |
| <b>DEXCHLORPHENIRAMINE MALEATE</b>     |                        |          |
| 10.0E-9                                |                        | 139.43   |
| 100.0E-9                               |                        | 116.03   |
| 1.0E-6                                 |                        | 113.86   |
| 10.0E-6                                |                        | 119.69   |
| <b>DEXLANSOPRAZOLE</b>                 |                        |          |
| 10.0E-9                                |                        | 126.77   |
| 100.0E-9                               |                        | 112.90   |
| 1.0E-6                                 |                        | 88.00    |
| 10.0E-6                                |                        | 104.37   |
| <b>DEXPANTHENOL</b>                    |                        |          |
| 10.0E-9                                |                        | 90.52    |
| 100.0E-9                               |                        | 80.96    |
| 1.0E-6                                 |                        | 70.64    |
| 10.0E-6                                |                        | 76.86    |
| <b>DEXPROPRANOLOL HYDROCHLORIDE</b>    |                        |          |
| 10.0E-9                                |                        | 110.75   |
| 100.0E-9                               |                        | 126.22   |
| 1.0E-6                                 |                        | 105.13   |
| 10.0E-6                                |                        | 113.19   |
| <b>DEXTROMETHORPHAN HYDROBROMIDE</b>   |                        |          |
| 10.0E-9                                |                        | 114.96   |
| 100.0E-9                               |                        | 108.88   |
| 1.0E-6                                 |                        | 97.60    |
| 10.0E-6                                |                        | 99.82    |
| <b>DIACERIN</b>                        |                        |          |
| 10.0E-9                                |                        | 111.35   |
| 100.0E-9                               |                        | 109.68   |
| 1.0E-6                                 |                        | 108.06   |
| 10.0E-6                                |                        | 113.73   |
| <b>DIACETAMATE</b>                     |                        |          |
| 10.0E-9                                |                        | 118.71   |
| 100.0E-9                               |                        | 118.57   |
| 1.0E-6                                 |                        | 100.14   |
| 10.0E-6                                |                        | 1.00     |
| <b>DIALLYL SULFIDE</b>                 |                        |          |
| 10.0E-9                                |                        | 119.60   |
| 100.0E-9                               |                        | 116.99   |
| 1.0E-6                                 |                        | 107.82   |
| 10.0E-6                                |                        | 114.60   |
| <b>DIALLYL TRISULFIDE</b>              |                        |          |
| 10.0E-9                                |                        | 114.75   |
| 100.0E-9                               |                        | 122.28   |
| 1.0E-6                                 |                        | 103.87   |
| 10.0E-6                                |                        | 50.57    |
| <b>DIATRIZOIC ACID</b>                 |                        |          |
| 10.0E-9                                |                        | 99.58    |
| 100.0E-9                               |                        | 95.52    |
| 1.0E-6                                 |                        | 107.72   |
| 10.0E-6                                |                        | 98.92    |
| <b>DIAZOXIDE</b>                       |                        |          |
| 10.0E-9                                |                        | 127.74   |
| 100.0E-9                               |                        | 126.47   |
| 1.0E-6                                 |                        | 122.31   |
| 10.0E-6                                |                        | 120.62   |
| <b>DIBEKACIN</b>                       |                        |          |
| 10.0E-9                                |                        | 113.94   |
| 100.0E-9                               |                        | 111.67   |
| 1.0E-6                                 |                        | 114.59   |
| 10.0E-6                                |                        | 118.27   |

| Compounds and Final Concentrations (M) | Average of % Viability | Hits (✓) |
|----------------------------------------|------------------------|----------|
| <b>DIBENZOTHIOPHENE</b>                |                        |          |
| 10.0E-9                                |                        | 116.22   |
| 100.0E-9                               |                        | 111.12   |
| 1.0E-6                                 |                        | 105.53   |
| 10.0E-6                                |                        | 96.60    |
| <b>DIBUCAINE HYDROCHLORIDE</b>         |                        |          |
| 10.0E-9                                |                        | 109.28   |
| 100.0E-9                               |                        | 113.07   |
| 1.0E-6                                 |                        | 105.12   |
| 10.0E-6                                |                        | 98.25    |
| <b>DIBUTYL PHTHALATE</b>               |                        |          |
| 10.0E-9                                |                        | 112.80   |
| 100.0E-9                               |                        | 117.76   |
| 1.0E-6                                 |                        | 112.88   |
| 10.0E-6                                |                        | 107.17   |
| <b>DICHLORISONE ACETATE</b>            |                        |          |
| 10.0E-9                                |                        | 111.87   |
| 100.0E-9                               |                        | 118.34   |
| 1.0E-6                                 |                        | 114.82   |
| 10.0E-6                                |                        | 114.57   |
| <b>DICHLOROPHENE</b>                   |                        |          |
| 10.0E-9                                |                        | 113.64   |
| 100.0E-9                               |                        | 114.29   |
| 1.0E-6                                 |                        | 118.14   |
| 10.0E-6                                |                        | 108.06   |
| <b>DICHLORVOS</b>                      |                        |          |
| 10.0E-9                                |                        | 115.53   |
| 100.0E-9                               |                        | 128.07   |
| 1.0E-6                                 |                        | 121.42   |
| 10.0E-6                                |                        | 117.22   |
| <b>DICLOFENAC SODIUM</b>               |                        |          |
| 10.0E-9                                |                        | 124.70   |
| 100.0E-9                               |                        | 126.79   |
| 1.0E-6                                 |                        | 104.83   |
| 10.0E-6                                |                        | 113.26   |
| <b>DICLOXACILLIN SODIUM</b>            |                        |          |
| 10.0E-9                                |                        | 107.36   |
| 100.0E-9                               |                        | 105.95   |
| 1.0E-6                                 |                        | 105.15   |
| 10.0E-6                                |                        | 104.48   |
| <b>DICTAMNINE</b>                      |                        |          |
| 10.0E-9                                |                        | 109.69   |
| 100.0E-9                               |                        | 114.13   |
| 1.0E-6                                 |                        | 124.20   |
| 10.0E-6                                |                        | 99.74    |
| <b>DICUMAROL</b>                       |                        |          |
| 10.0E-9                                |                        | 109.36   |
| 100.0E-9                               |                        | 110.18   |
| 1.0E-6                                 |                        | 102.48   |
| 10.0E-6                                |                        | 100.30   |
| <b>DICYCLOMINE HYDROCHLORIDE</b>       |                        |          |
| 10.0E-9                                |                        | 108.35   |
| 100.0E-9                               |                        | 106.06   |
| 1.0E-6                                 |                        | 105.16   |
| 10.0E-6                                |                        | 104.93   |
| <b>DIENESTROL</b>                      |                        |          |
| 10.0E-9                                |                        | 111.87   |
| 100.0E-9                               |                        | 93.17    |
| 1.0E-6                                 |                        | 100.56   |
| 10.0E-6                                |                        | 96.03    |
| <b>DIETHYLCARBAMAZINE CITRATE</b>      |                        |          |
| 10.0E-9                                |                        | 120.41   |
| 100.0E-9                               |                        | 69.90    |
| 1.0E-6                                 |                        | 105.67   |
| 10.0E-6                                |                        | 106.11   |
| <b>DIETHYLSTILBESTROL</b>              |                        |          |
| 10.0E-9                                |                        | 91.22    |
| 100.0E-9                               |                        | 100.10   |
| 1.0E-6                                 |                        | 83.91    |
| 10.0E-6                                |                        | 93.11    |
| <b>DIETHYLTOLUAMIDE</b>                |                        |          |
| 10.0E-9                                |                        | 97.84    |
| 100.0E-9                               |                        | 94.86    |
| 1.0E-6                                 |                        | 88.88    |
| 10.0E-6                                |                        | 91.80    |
| <b>DIFFRACTAIC ACID</b>                |                        |          |
| 10.0E-9                                |                        | 94.10    |
| 100.0E-9                               |                        | 111.25   |
| 1.0E-6                                 |                        | 120.92   |
| 10.0E-6                                |                        | 98.94    |

| Compounds and Final Concentrations (M)   | Average of % Viability | Hits (✓) |
|------------------------------------------|------------------------|----------|
| <b>DIFLORASONE DIACETATE</b>             |                        |          |
| 10.0E-9                                  |                        | 133.56   |
| 100.0E-9                                 |                        | 130.75   |
| 1.0E-6                                   |                        | 148.43   |
| 10.0E-6                                  |                        | 111.59   |
| <b>DIFLUNISAL</b>                        |                        |          |
| 10.0E-9                                  |                        | 109.85   |
| 100.0E-9                                 |                        | 102.48   |
| 1.0E-6                                   |                        | 96.51    |
| 10.0E-6                                  |                        | 104.08   |
| <b>DIFUCOL HEXAMETHYL ETHER</b>          |                        |          |
| 10.0E-9                                  |                        | 115.57   |
| 100.0E-9                                 |                        | 134.72   |
| 1.0E-6                                   |                        | 120.18   |
| 10.0E-6                                  |                        | 112.69   |
| <b>DIGITONIN</b>                         |                        |          |
| 10.0E-9                                  |                        | 95.58    |
| 100.0E-9                                 |                        | 92.45    |
| 1.0E-6                                   |                        | 69.75    |
| 10.0E-6                                  |                        | 0.22     |
| <b>DIGITOXIN</b>                         |                        |          |
| 10.0E-9                                  |                        | 97.99    |
| 100.0E-9                                 |                        | 91.99    |
| 1.0E-6                                   |                        | 1.61     |
| 10.0E-6                                  |                        | 2.08     |
| <b>DIGOXIGENIN</b>                       |                        |          |
| 10.0E-9                                  |                        | 116.02   |
| 100.0E-9                                 |                        | 129.90   |
| 1.0E-6                                   |                        | 1.93     |
| 10.0E-6                                  |                        | 1.88     |
| <b>DIGOXIN</b>                           |                        |          |
| 10.0E-9                                  |                        | 110.55   |
| 100.0E-9                                 |                        | 20.79    |
| 1.0E-6                                   |                        | 2.04     |
| 10.0E-6                                  |                        | 2.11     |
| <b>DIHYDROCELASTROL</b>                  |                        |          |
| 10.0E-9                                  |                        | 84.23    |
| 100.0E-9                                 |                        | 81.13    |
| 1.0E-6                                   |                        | 66.10    |
| 10.0E-6                                  |                        | 3.44     |
| <b>DIHYDROCELASTRYL DIACETATE</b>        |                        |          |
| 10.0E-9                                  |                        | 119.37   |
| 100.0E-9                                 |                        | 104.30   |
| 1.0E-6                                   |                        | 89.84    |
| 10.0E-6                                  |                        | 1.12     |
| <b>DIHYDROERGOTAMINE MESYLATE</b>        |                        |          |
| 10.0E-9                                  |                        | 122.14   |
| 100.0E-9                                 |                        | 110.37   |
| 1.0E-6                                   |                        | 108.87   |
| 10.0E-6                                  |                        | 109.61   |
| <b>DIHYDROFISSINOLIDE</b>                |                        |          |
| 10.0E-9                                  |                        | 124.29   |
| 100.0E-9                                 |                        | 114.93   |
| 1.0E-6                                   |                        | 110.51   |
| 10.0E-6                                  |                        | 109.68   |
| <b>DIHYDROFOLIC ACID</b>                 |                        |          |
| 10.0E-9                                  |                        | 78.61    |
| 100.0E-9                                 |                        | 71.85    |
| 1.0E-6                                   |                        | 83.01    |
| 10.0E-6                                  |                        | 77.14    |
| <b>DIHYDROGEDUNIC ACID, METHYL ESTER</b> |                        |          |
| 10.0E-9                                  |                        | 117.21   |
| 100.0E-9                                 |                        | 107.86   |
| 1.0E-6                                   |                        | 115.75   |
| 10.0E-6                                  |                        | 101.27   |
| <b>DIHYDROGEDUNIN</b>                    |                        |          |
| 10.0E-9                                  |                        | 124.43   |
| 100.0E-9                                 |                        | 110.36   |
| 1.0E-6                                   |                        | 92.87    |
| 10.0E-6                                  |                        | 77.03    |
| <b>DIHYDROJASMONIC ACID</b>              |                        |          |
| 10.0E-9                                  |                        | 109.83   |
| 100.0E-9                                 |                        | 120.80   |
| 1.0E-6                                   |                        | 120.16   |
| 10.0E-6                                  |                        | 115.17   |
| <b>DIHYDROMYRISTICIN</b>                 |                        |          |
| 10.0E-9                                  |                        | 117.64   |
| 100.0E-9                                 |                        | 129.80   |
| 1.0E-6                                   |                        | 123.89   |
| 10.0E-6                                  |                        | 121.77   |



| Compounds and Final Concentrations (M)              | Average of % Viability | Hits (✓) |
|-----------------------------------------------------|------------------------|----------|
| <b>DIHYDROSTREPTOMYCIN SULFATE</b>                  |                        |          |
| 10.0E-9                                             |                        | 125.45   |
| 100.0E-9                                            |                        | 112.82   |
| 1.0E-6                                              |                        | 104.94   |
| 10.0E-6                                             |                        | 103.89   |
| <b>DIHYDROTANSHINONE I</b>                          |                        |          |
| 10.0E-9                                             |                        | 123.21   |
| 100.0E-9                                            |                        | 126.79   |
| 1.0E-6                                              |                        | 116.25   |
| 10.0E-6                                             |                        | 71.75    |
| <b>DIHYDROXY (3alpha,12alpha)PREGNAN-20-ONE</b>     |                        |          |
| 10.0E-9                                             |                        | 129.50   |
| 100.0E-9                                            |                        | 130.57   |
| 1.0E-6                                              |                        | 119.72   |
| 10.0E-6                                             |                        | 103.68   |
| <b>DILOXANIDE FUROATE</b>                           |                        |          |
| 10.0E-9                                             |                        | 124.01   |
| 100.0E-9                                            |                        | 111.48   |
| 1.0E-6                                              |                        | 102.13   |
| 10.0E-6                                             |                        | 109.58   |
| <b>DILTIAZEM HYDROCHLORIDE</b>                      |                        |          |
| 10.0E-9                                             |                        | 129.19   |
| 100.0E-9                                            |                        | 120.57   |
| 1.0E-6                                              |                        | 112.69   |
| 10.0E-6                                             |                        | 105.99   |
| <b>DIMENHYDRINATE</b>                               |                        |          |
| 10.0E-9                                             |                        | 102.47   |
| 100.0E-9                                            |                        | 106.52   |
| 1.0E-6                                              |                        | 91.80    |
| 10.0E-6                                             |                        | 102.04   |
| <b>DIMERCAPROL</b>                                  |                        |          |
| 10.0E-9                                             |                        | 114.45   |
| 100.0E-9                                            |                        | 106.11   |
| 1.0E-6                                              |                        | 80.71    |
| 10.0E-6                                             |                        | 12.53    |
| <b>DIMETHADIONE</b>                                 |                        |          |
| 10.0E-9                                             |                        | 111.10   |
| 100.0E-9                                            |                        | 91.84    |
| 1.0E-6                                              |                        | 97.22    |
| 10.0E-6                                             |                        | 97.40    |
| <b>DIMETHYL 4,4-o-PHENYLENE-BIS (3-THIOPHANATE)</b> |                        |          |
| 10.0E-9                                             |                        | 122.16   |
| 100.0E-9                                            |                        | 113.17   |
| 1.0E-6                                              |                        | 109.90   |
| 10.0E-6                                             |                        | 122.53   |
| <b>DIMETHYLCAFFEIC ACID</b>                         |                        |          |
| 10.0E-9                                             |                        | 121.50   |
| 100.0E-9                                            |                        | 116.69   |
| 1.0E-6                                              |                        | 125.51   |
| 10.0E-6                                             |                        | 123.19   |
| <b>DINITOLMIDE</b>                                  |                        |          |
| 10.0E-9                                             |                        | 118.54   |
| 100.0E-9                                            |                        | 129.99   |
| 1.0E-6                                              |                        | 109.58   |
| 10.0E-6                                             |                        | 113.09   |
| <b>DIOSGENIN</b>                                    |                        |          |
| 10.0E-9                                             |                        | 97.22    |
| 100.0E-9                                            |                        | 111.82   |
| 1.0E-6                                              |                        | 109.41   |
| 10.0E-6                                             |                        | 42.95    |
| <b>DIOSMETIN</b>                                    |                        |          |
| 10.0E-9                                             |                        | 98.97    |
| 100.0E-9                                            |                        | 97.34    |
| 1.0E-6                                              |                        | 95.79    |
| 10.0E-6                                             |                        | 93.85    |
| <b>DIOSMIN</b>                                      |                        |          |
| 10.0E-9                                             |                        | 97.69    |
| 100.0E-9                                            |                        | 109.99   |
| 1.0E-6                                              |                        | 95.14    |
| 10.0E-6                                             |                        | 89.47    |
| <b>DIOXYBENZONE</b>                                 |                        |          |
| 10.0E-9                                             |                        | 110.45   |
| 100.0E-9                                            |                        | 85.29    |
| 1.0E-6                                              |                        | 95.18    |
| 10.0E-6                                             |                        | 104.94   |
| <b>DIPERODON HYDROCHLORIDE</b>                      |                        |          |
| 10.0E-9                                             |                        | 91.39    |
| 100.0E-9                                            |                        | 110.16   |
| 1.0E-6                                              |                        | 103.01   |
| 10.0E-6                                             |                        | 97.88    |

| Compounds and Final Concentrations (M) | Average of % Viability | Hits (✓) |
|----------------------------------------|------------------------|----------|
| <b>DIPHENHYDRAMINE HYDROCHLORIDE</b>   |                        |          |
| 10.0E-9                                |                        | 106.44   |
| 100.0E-9                               |                        | 69.26    |
| 1.0E-6                                 |                        | 99.08    |
| 10.0E-6                                |                        | 101.01   |
| <b>DIPHENYLPYRALINE HYDROCHLORIDE</b>  |                        |          |
| 10.0E-9                                |                        | 91.37    |
| 100.0E-9                               |                        | 86.68    |
| 1.0E-6                                 |                        | 73.21    |
| 10.0E-6                                |                        | 73.26    |
| <b>DIPLOSALSALATE</b>                  |                        |          |
| 10.0E-9                                |                        | 93.26    |
| 100.0E-9                               |                        | 87.51    |
| 1.0E-6                                 |                        | 102.35   |
| 10.0E-6                                |                        | 105.54   |
| <b>DIPTERYXIN</b>                      |                        |          |
| 10.0E-9                                |                        | 120.24   |
| 100.0E-9                               |                        | 138.39   |
| 1.0E-6                                 |                        | 93.29    |
| 10.0E-6                                |                        | 80.97    |
| <b>DIPYRIDAMOLE</b>                    |                        |          |
| 10.0E-9                                |                        | 102.43   |
| 100.0E-9                               |                        | 100.83   |
| 1.0E-6                                 |                        | 89.76    |
| 10.0E-6                                |                        | 93.13    |
| <b>DIPYROCETYL</b>                     |                        |          |
| 10.0E-9                                |                        | 92.27    |
| 100.0E-9                               |                        | 84.19    |
| 1.0E-6                                 |                        | 108.86   |
| 10.0E-6                                |                        | 104.85   |
| <b>DIPYRONE</b>                        |                        |          |
| 10.0E-9                                |                        | 111.54   |
| 100.0E-9                               |                        | 109.17   |
| 1.0E-6                                 |                        | 106.78   |
| 10.0E-6                                |                        | 89.15    |
| <b>DIRITHROMYCIN</b>                   |                        |          |
| 10.0E-9                                |                        | 121.00   |
| 100.0E-9                               |                        | 124.94   |
| 1.0E-6                                 |                        | 139.19   |
| 10.0E-6                                |                        | 118.68   |
| <b>DISOPYRAMIDE PHOSPHATE</b>          |                        |          |
| 10.0E-9                                |                        | 107.44   |
| 100.0E-9                               |                        | 106.02   |
| 1.0E-6                                 |                        | 92.46    |
| 10.0E-6                                |                        | 97.31    |
| <b>DISULFIRAM</b>                      |                        |          |
| 10.0E-9                                |                        | 119.37   |
| 100.0E-9                               |                        | 108.54   |
| 1.0E-6                                 |                        | -0.02    |
| 10.0E-6                                |                        | 0.03     |
| <b>DJENKOLIC ACID</b>                  |                        |          |
| 10.0E-9                                |                        | 105.40   |
| 100.0E-9                               |                        | 123.33   |
| 1.0E-6                                 |                        | 104.30   |
| 10.0E-6                                |                        | 118.89   |
| <b>D-LACTITOL MONOHYDRATE</b>          |                        |          |
| 10.0E-9                                |                        | 100.02   |
| 100.0E-9                               |                        | 104.03   |
| 1.0E-6                                 |                        | 97.31    |
| 10.0E-6                                |                        | 101.22   |
| <b>DOBUTAMINE HYDROCHLORIDE</b>        |                        |          |
| 10.0E-9                                |                        | 71.53    |
| 100.0E-9                               |                        | 73.11    |
| 1.0E-6                                 |                        | 76.41    |
| 10.0E-6                                |                        | 60.29    |
| <b>DOCOSANOL</b>                       |                        |          |
| 10.0E-9                                |                        | 104.44   |
| 100.0E-9                               |                        | 95.40    |
| 1.0E-6                                 |                        | 96.95    |
| 10.0E-6                                |                        | 2.70     |
| <b>DOMPERIDONE</b>                     |                        |          |
| 10.0E-9                                |                        | 135.52   |
| 100.0E-9                               |                        | 89.18    |
| 1.0E-6                                 |                        | 113.55   |
| 10.0E-6                                |                        | 111.56   |
| <b>DONEPEZIL HYDROCHLORIDE</b>         |                        |          |
| 10.0E-9                                |                        | 98.02    |
| 100.0E-9                               |                        | 107.30   |
| 1.0E-6                                 |                        | 102.83   |
| 10.0E-6                                |                        | 97.72    |

| Compounds and Final Concentrations (M) | Average of % Viability | Hits (✓) |
|----------------------------------------|------------------------|----------|
| <b>DOPAMINE HYDROCHLORIDE</b>          |                        |          |
| 10.0E-9                                |                        | 124.10   |
| 100.0E-9                               |                        | 101.96   |
| 1.0E-6                                 |                        | 107.33   |
| 10.0E-6                                |                        | 100.55   |
| <b>DOXAZOSIN MESYLATE</b>              |                        |          |
| 10.0E-9                                |                        | 116.91   |
| 100.0E-9                               |                        | 114.95   |
| 1.0E-6                                 |                        | 116.46   |
| 10.0E-6                                |                        | 120.12   |
| <b>DOXEPIN HYDROCHLORIDE</b>           |                        |          |
| 10.0E-9                                |                        | 112.80   |
| 100.0E-9                               |                        | 107.63   |
| 1.0E-6                                 |                        | 92.91    |
| 10.0E-6                                |                        | 93.36    |
| <b>DOXIFLURIDINE</b>                   |                        |          |
| 10.0E-9                                |                        | 113.63   |
| 100.0E-9                               |                        | 116.16   |
| 1.0E-6                                 |                        | 115.10   |
| 10.0E-6                                |                        | 2.14     |
| <b>DOXORUBICIN</b>                     |                        |          |
| 10.0E-9                                |                        | 115.65   |
| 100.0E-9                               |                        | 79.43    |
| 1.0E-6                                 |                        | 2.30     |
| 10.0E-6                                |                        | 0.09     |
| <b>DOXYCYCLINE HYDROCHLORIDE</b>       |                        |          |
| 10.0E-9                                |                        | 106.23   |
| 100.0E-9                               |                        | 92.91    |
| 1.0E-6                                 |                        | 89.48    |
| 10.0E-6                                |                        | 60.57    |
| <b>DOXYLAMINE SUCCINATE</b>            |                        |          |
| 10.0E-9                                |                        | 100.20   |
| 100.0E-9                               |                        | 71.88    |
| 1.0E-6                                 |                        | 94.97    |
| 10.0E-6                                |                        | 96.40    |
| <b>D-PHENYLALANINE</b>                 |                        |          |
| 10.0E-9                                |                        | 111.55   |
| 100.0E-9                               |                        | 122.71   |
| 1.0E-6                                 |                        | 105.30   |
| 10.0E-6                                |                        | 115.06   |
| <b>DROFENINE HYDROCHLORIDE</b>         |                        |          |
| 10.0E-9                                |                        | 104.49   |
| 100.0E-9                               |                        | 114.05   |
| 1.0E-6                                 |                        | 126.22   |
| 10.0E-6                                |                        | 103.19   |
| <b>DROPERIDOL</b>                      |                        |          |
| 10.0E-9                                |                        | 87.88    |
| 100.0E-9                               |                        | 88.83    |
| 1.0E-6                                 |                        | 82.34    |
| 10.0E-6                                |                        | 75.89    |
| <b>DROPROPIZINE</b>                    |                        |          |
| 10.0E-9                                |                        | 124.53   |
| 100.0E-9                               |                        | 105.01   |
| 1.0E-6                                 |                        | 107.50   |
| 10.0E-6                                |                        | 111.88   |
| <b>DUARTIN (-)</b>                     |                        |          |
| 10.0E-9                                |                        | 124.08   |
| 100.0E-9                               |                        | 135.40   |
| 1.0E-6                                 |                        | 110.99   |
| 10.0E-6                                |                        | 39.44    |
| <b>DUARTIN, DIMETHYL ETHER</b>         |                        |          |
| 10.0E-9                                |                        | 107.87   |
| 100.0E-9                               |                        | 130.56   |
| 1.0E-6                                 |                        | 106.42   |
| 10.0E-6                                |                        | 97.97    |
| <b>DULOXTINE HYDROCHLORIDE</b>         |                        |          |
| 10.0E-9                                |                        | 94.00    |
| 100.0E-9                               |                        | 92.85    |
| 1.0E-6                                 |                        | 89.96    |
| 10.0E-6                                |                        | 43.00    |
| <b>DYCLONINE HYDROCHLORIDE</b>         |                        |          |
| 10.0E-9                                |                        | 100.60   |
| 100.0E-9                               |                        | 62.74    |
| 1.0E-6                                 |                        | 85.35    |
| 10.0E-6                                |                        | 85.67    |
| <b>DYPHYLLINE</b>                      |                        |          |
| 10.0E-9                                |                        | 73.31    |
| 100.0E-9                               |                        | 92.26    |
| 1.0E-6                                 |                        | 64.07    |
| 10.0E-6                                |                        | 37.30    |

| Compounds and Final Concentrations (M)             | Average of % Viability | Hits (✓) |
|----------------------------------------------------|------------------------|----------|
| <b>EBSELEN</b>                                     |                        |          |
| 10.0E-9                                            |                        | 118.59   |
| 100.0E-9                                           |                        | 125.41   |
| 1.0E-6                                             |                        | 107.08   |
| 10.0E-6                                            |                        | 88.14    |
| <b>ECONAZOLE NITRATE</b>                           |                        |          |
| 10.0E-9                                            |                        | 114.17   |
| 100.0E-9                                           |                        | 105.72   |
| 1.0E-6                                             |                        | 42.88    |
| 10.0E-6                                            |                        | 2.02     |
| <b>EDOXUDINE</b>                                   |                        |          |
| 10.0E-9                                            |                        | 107.48   |
| 100.0E-9                                           |                        | 98.51    |
| 1.0E-6                                             |                        | 92.53    |
| 10.0E-6                                            |                        | 89.28    |
| <b>EDROPHONIUM CHLORIDE</b>                        |                        |          |
| 10.0E-9                                            |                        | 65.36    |
| 100.0E-9                                           |                        | 88.31    |
| 1.0E-6                                             |                        | 89.71    |
| 10.0E-6                                            |                        | 86.26    |
| <b>EFAROXAN HYDROCHLORIDE</b>                      |                        |          |
| 10.0E-9                                            |                        | 91.40    |
| 100.0E-9                                           |                        | 89.38    |
| 1.0E-6                                             |                        | 80.55    |
| 10.0E-6                                            |                        | 79.66    |
| <b>EFLOXATE</b>                                    |                        |          |
| 10.0E-9                                            |                        | 113.39   |
| 100.0E-9                                           |                        | 117.77   |
| 1.0E-6                                             |                        | 106.65   |
| 10.0E-6                                            |                        | 122.13   |
| <b>ELAIDYLPHOSPHOCHOLINE</b>                       |                        |          |
| 10.0E-9                                            |                        | 139.92   |
| 100.0E-9                                           |                        | 128.89   |
| 1.0E-6                                             |                        | 130.31   |
| 10.0E-6                                            |                        | 39.53    |
| <b>ELETRIPTAN HYDROBROMIDE</b>                     |                        |          |
| 10.0E-9                                            |                        | 120.51   |
| 100.0E-9                                           |                        | 112.55   |
| 1.0E-6                                             |                        | 119.21   |
| 10.0E-6                                            |                        | 126.41   |
| <b>ELLAGIC ACID</b>                                |                        |          |
| 10.0E-9                                            |                        | 119.69   |
| 100.0E-9                                           |                        | 113.48   |
| 1.0E-6                                             |                        | 115.09   |
| 10.0E-6                                            |                        | 101.85   |
| <b>EMETINE</b>                                     |                        |          |
| 10.0E-9                                            |                        | 88.03    |
| 100.0E-9                                           |                        | 91.08    |
| 1.0E-6                                             |                        | 69.12    |
| 10.0E-6                                            |                        | 0.10     |
| <b>EMODIN</b>                                      |                        |          |
| 10.0E-9                                            |                        | 109.33   |
| 100.0E-9                                           |                        | 114.51   |
| 1.0E-6                                             |                        | 111.15   |
| 10.0E-6                                            |                        | 98.18    |
| <b>ENALAPRIL MALEATE</b>                           |                        |          |
| 10.0E-9                                            |                        | 109.99   |
| 100.0E-9                                           |                        | 112.73   |
| 1.0E-6                                             |                        | 107.16   |
| 10.0E-6                                            |                        | 101.44   |
| <b>ENILCONAZOLE</b>                                |                        |          |
| 10.0E-9                                            |                        | 79.84    |
| 100.0E-9                                           |                        | 95.30    |
| 1.0E-6                                             |                        | 82.01    |
| 10.0E-6                                            |                        | 53.10    |
| <b>ENOXACIN</b>                                    |                        |          |
| 10.0E-9                                            |                        | 95.15    |
| 100.0E-9                                           |                        | 91.78    |
| 1.0E-6                                             |                        | 88.01    |
| 10.0E-6                                            |                        | 1.74     |
| <b>ENOXAPARIN SODIUM (1% wt/vol in 10%aq DMSO)</b> |                        |          |
| 10.0E-9                                            |                        | 117.71   |
| 100.0E-9                                           |                        | 136.10   |
| 1.0E-6                                             |                        | 92.41    |
| 10.0E-6                                            |                        | 44.96    |
| <b>ENOXOLONE</b>                                   |                        |          |
| 10.0E-9                                            |                        | 116.73   |
| 100.0E-9                                           |                        | 123.81   |
| 1.0E-6                                             |                        | 113.61   |
| 10.0E-6                                            |                        | 126.11   |

| Compounds and Final Concentrations (M)      | Average of % Viability | Hits (✓) |
|---------------------------------------------|------------------------|----------|
| <b>ENROFLOXACIN</b>                         |                        |          |
| 10.0E-9                                     |                        | 94.32    |
| 100.0E-9                                    |                        | 101.16   |
| 1.0E-6                                      |                        | 91.56    |
| 10.0E-6                                     |                        | 85.84    |
| <b>ENTANDROPHRAGMIN</b>                     |                        |          |
| 10.0E-9                                     |                        | 147.50   |
| 100.0E-9                                    |                        | 140.50   |
| 1.0E-6                                      |                        | 111.98   |
| 10.0E-6                                     |                        | 60.01    |
| <b>EPI(13)TORULOSOL</b>                     |                        |          |
| 10.0E-9                                     |                        | 134.37   |
| 100.0E-9                                    |                        | 141.14   |
| 1.0E-6                                      |                        | 112.49   |
| 10.0E-6                                     |                        | 84.98    |
| <b>EPIAFZELECHIN (2R,3R)(-)</b>             |                        |          |
| 10.0E-9                                     |                        | 126.39   |
| 100.0E-9                                    |                        | 132.96   |
| 1.0E-6                                      |                        | 113.88   |
| 10.0E-6                                     |                        | 105.53   |
| <b>EPIAFZELECHIN TRIMETHYL ETHER</b>        |                        |          |
| 10.0E-9                                     |                        | 121.21   |
| 100.0E-9                                    |                        | 148.58   |
| 1.0E-6                                      |                        | 101.21   |
| 10.0E-6                                     |                        | 118.21   |
| <b>EPIANDROSTERONE</b>                      |                        |          |
| 10.0E-9                                     |                        | 119.27   |
| 100.0E-9                                    |                        | 129.88   |
| 1.0E-6                                      |                        | 111.29   |
| 10.0E-6                                     |                        | 93.59    |
| <b>EPICATECHIN</b>                          |                        |          |
| 10.0E-9                                     |                        | 104.30   |
| 100.0E-9                                    |                        | 129.67   |
| 1.0E-6                                      |                        | 114.55   |
| 10.0E-6                                     |                        | 101.81   |
| <b>EPICATECHIN MONOGALLATE</b>              |                        |          |
| 10.0E-9                                     |                        | 97.12    |
| 100.0E-9                                    |                        | 111.54   |
| 1.0E-6                                      |                        | 111.35   |
| 10.0E-6                                     |                        | 110.93   |
| <b>EPICATECHIN PENTAACETATE</b>             |                        |          |
| 10.0E-9                                     |                        | 116.38   |
| 100.0E-9                                    |                        | 141.69   |
| 1.0E-6                                      |                        | 114.35   |
| 10.0E-6                                     |                        | 27.49    |
| <b>EPIESTRIOL</b>                           |                        |          |
| 10.0E-9                                     |                        | 91.80    |
| 100.0E-9                                    |                        | 80.24    |
| 1.0E-6                                      |                        | 72.64    |
| 10.0E-6                                     |                        | 84.33    |
| <b>EPIGALLOCATECHIN</b>                     |                        |          |
| 10.0E-9                                     |                        | 111.82   |
| 100.0E-9                                    |                        | 133.67   |
| 1.0E-6                                      |                        | 123.58   |
| 10.0E-6                                     |                        | 95.27    |
| <b>EPIGALLOCATECHIN 3,5-DIGALLATE</b>       |                        |          |
| 10.0E-9                                     |                        | 112.40   |
| 100.0E-9                                    |                        | 127.93   |
| 1.0E-6                                      |                        | 118.85   |
| 10.0E-6                                     |                        | 2.34     |
| <b>EPIGALLOCATECHIN-3-MONOGALLATE</b>       |                        |          |
| 10.0E-9                                     |                        | 114.53   |
| 100.0E-9                                    |                        | 143.15   |
| 1.0E-6                                      |                        | 129.63   |
| 10.0E-6                                     |                        | 111.49   |
| <b>EPIRUBICIN HYDROCHLORIDE</b>             |                        |          |
| 10.0E-9                                     |                        | 74.98    |
| 100.0E-9                                    |                        | 57.07    |
| 1.0E-6                                      |                        | 2.96     |
| 10.0E-6                                     |                        | 0.47     |
| <b>EPITESTOSTERONE</b>                      |                        |          |
| 10.0E-9                                     |                        | 126.33   |
| 100.0E-9                                    |                        | 112.16   |
| 1.0E-6                                      |                        | 106.20   |
| 10.0E-6                                     |                        | 66.95    |
| <b>EPOXY (4,5alpha)-4,5-DIHYDROSANTONIN</b> |                        |          |
| 10.0E-9                                     |                        | 123.79   |
| 100.0E-9                                    |                        | 113.30   |
| 1.0E-6                                      |                        | 89.75    |
| 10.0E-6                                     |                        | 2.01     |

| Compounds and Final Concentrations (M) | Average of % Viability | Hits (✓) |
|----------------------------------------|------------------------|----------|
| <b>EPOXYGEDUNIN</b>                    |                        |          |
| 10.0E-9                                |                        | 123.61   |
| 100.0E-9                               |                        | 133.03   |
| 1.0E-6                                 |                        | 110.60   |
| 10.0E-6                                |                        | 82.76    |
| <b>EQUILIN</b>                         |                        |          |
| 10.0E-9                                |                        | 100.14   |
| 100.0E-9                               |                        | 95.99    |
| 1.0E-6                                 |                        | 84.72    |
| 10.0E-6                                |                        | 90.44    |
| <b>ERGOCALCIFEROL</b>                  |                        |          |
| 10.0E-9                                |                        | 95.45    |
| 100.0E-9                               |                        | 87.52    |
| 1.0E-6                                 |                        | 86.31    |
| 10.0E-6                                |                        | 70.74    |
| <b>ERGONOVINE MALEATE</b>              |                        |          |
| 10.0E-9                                |                        | 93.83    |
| 100.0E-9                               |                        | 84.29    |
| 1.0E-6                                 |                        | 84.94    |
| 10.0E-6                                |                        | 94.86    |
| <b>ERGOSTEROL</b>                      |                        |          |
| 10.0E-9                                |                        | 106.82   |
| 100.0E-9                               |                        | 130.29   |
| 1.0E-6                                 |                        | 119.48   |
| 10.0E-6                                |                        | 131.65   |
| <b>ERGOSTEROL ACETATE</b>              |                        |          |
| 10.0E-9                                |                        | 109.13   |
| 100.0E-9                               |                        | 125.01   |
| 1.0E-6                                 |                        | 120.54   |
| 10.0E-6                                |                        | 82.09    |
| <b>ERGOTAMINE TARTRATE</b>             |                        |          |
| 10.0E-9                                |                        | 122.26   |
| 100.0E-9                               |                        | 125.85   |
| 1.0E-6                                 |                        | 114.96   |
| 10.0E-6                                |                        | 100.97   |
| <b>ERYTHROMYCIN</b>                    |                        |          |
| 10.0E-9                                |                        | 103.67   |
| 100.0E-9                               |                        | 100.63   |
| 1.0E-6                                 |                        | 110.86   |
| 10.0E-6                                |                        | 91.08    |
| <b>ERYTHROMYCIN ESTOLATE</b>           |                        |          |
| 10.0E-9                                |                        | 91.15    |
| 100.0E-9                               |                        | 106.61   |
| 1.0E-6                                 |                        | 100.51   |
| 10.0E-6                                |                        | 87.75    |
| <b>ERYTHROMYCIN ETHYLSUCCINATE</b>     |                        |          |
| 10.0E-9                                |                        | 96.78    |
| 100.0E-9                               |                        | 78.32    |
| 1.0E-6                                 |                        | 91.67    |
| 10.0E-6                                |                        | 93.57    |
| <b>ERYTHROMYCIN STEARATE</b>           |                        |          |
| 10.0E-9                                |                        | 96.06    |
| 100.0E-9                               |                        | 96.00    |
| 1.0E-6                                 |                        | 117.56   |
| 10.0E-6                                |                        | 100.41   |
| <b>ERYTHROSE</b>                       |                        |          |
| 10.0E-9                                |                        | 119.53   |
| 100.0E-9                               |                        | 110.41   |
| 1.0E-6                                 |                        | 109.64   |
| 10.0E-6                                |                        | 111.40   |
| <b>ERYTHROSINE SODIUM</b>              |                        |          |
| 10.0E-9                                |                        | 83.19    |
| 100.0E-9                               |                        | 68.41    |
| 1.0E-6                                 |                        | 91.22    |
| 10.0E-6                                |                        | 62.94    |
| <b>ESCITALOPRAM OXALATE</b>            |                        |          |
| 10.0E-9                                |                        | 119.90   |
| 100.0E-9                               |                        | 118.15   |
| 1.0E-6                                 |                        | 121.98   |
| 10.0E-6                                |                        | 108.19   |
| <b>ESCULETIN</b>                       |                        |          |
| 10.0E-9                                |                        | 112.68   |
| 100.0E-9                               |                        | 128.62   |
| 1.0E-6                                 |                        | 124.87   |
| 10.0E-6                                |                        | 30.73    |
| <b>ESEROLINE FUMARATE</b>              |                        |          |
| 10.0E-9                                |                        | 119.51   |
| 100.0E-9                               |                        | 128.29   |
| 1.0E-6                                 |                        | 110.04   |
| 10.0E-6                                |                        | 4.48     |

| Compounds and Final Concentrations (M)  | Average of % Viability | Hits (✓) |
|-----------------------------------------|------------------------|----------|
| <b>ESTRADIOL</b>                        |                        |          |
| 10.0E-9                                 |                        | 96.94    |
| 100.0E-9                                |                        | 74.92    |
| 1.0E-6                                  |                        | 90.69    |
| 10.0E-6                                 |                        | 85.41    |
| <b>ESTRADIOL ACETATE</b>                |                        |          |
| 10.0E-9                                 |                        | 78.63    |
| 100.0E-9                                |                        | 95.84    |
| 1.0E-6                                  |                        | 97.67    |
| 10.0E-6                                 |                        | 93.18    |
| <b>ESTRADIOL BENZOATE</b>               |                        |          |
| 10.0E-9                                 |                        | 90.15    |
| 100.0E-9                                |                        | 112.43   |
| 1.0E-6                                  |                        | 90.78    |
| 10.0E-6                                 |                        | 77.72    |
| <b>ESTRADIOL CYPIONATE</b>              |                        |          |
| 10.0E-9                                 |                        | 92.48    |
| 100.0E-9                                |                        | 61.48    |
| 1.0E-6                                  |                        | 90.94    |
| 10.0E-6                                 |                        | 80.56    |
| <b>ESTRADIOL METHYL ETHER</b>           |                        |          |
| 10.0E-9                                 |                        | 112.07   |
| 100.0E-9                                |                        | 118.36   |
| 1.0E-6                                  |                        | 119.19   |
| 10.0E-6                                 |                        | 106.36   |
| <b>ESTRADIOL VALERATE</b>               |                        |          |
| 10.0E-9                                 |                        | 83.15    |
| 100.0E-9                                |                        | 86.74    |
| 1.0E-6                                  |                        | 94.20    |
| 10.0E-6                                 |                        | 93.38    |
| <b>ESTRADIOL-3-SULFATE, SODIUM SALT</b> |                        |          |
| 10.0E-9                                 |                        | 125.83   |
| 100.0E-9                                |                        | 122.56   |
| 1.0E-6                                  |                        | 114.25   |
| 10.0E-6                                 |                        | 119.40   |
| <b>ESTRAGOLE</b>                        |                        |          |
| 10.0E-9                                 |                        | 93.84    |
| 100.0E-9                                |                        | 105.24   |
| 1.0E-6                                  |                        | 102.45   |
| 10.0E-6                                 |                        | 98.05    |
| <b>ESTRIOL</b>                          |                        |          |
| 10.0E-9                                 |                        | 88.92    |
| 100.0E-9                                |                        | 101.28   |
| 1.0E-6                                  |                        | 105.70   |
| 10.0E-6                                 |                        | 98.00    |
| <b>ESTRONE</b>                          |                        |          |
| 10.0E-9                                 |                        | 83.66    |
| 100.0E-9                                |                        | 85.05    |
| 1.0E-6                                  |                        | 94.25    |
| 10.0E-6                                 |                        | 100.12   |
| <b>ESTRONE BENZOATE</b>                 |                        |          |
| 10.0E-9                                 |                        | 92.73    |
| 100.0E-9                                |                        | 97.30    |
| 1.0E-6                                  |                        | 34.19    |
| 10.0E-6                                 |                        | 1.67     |
| <b>ESTROPIPATE</b>                      |                        |          |
| 10.0E-9                                 |                        | 115.05   |
| 100.0E-9                                |                        | 99.56    |
| 1.0E-6                                  |                        | 101.48   |
| 10.0E-6                                 |                        | 103.68   |
| <b>ETHACRIDINE LACTATE</b>              |                        |          |
| 10.0E-9                                 |                        | 122.52   |
| 100.0E-9                                |                        | 105.96   |
| 1.0E-6                                  |                        | 113.34   |
| 10.0E-6                                 |                        | 4.34     |
| <b>ETHACRYNIC ACID</b>                  |                        |          |
| 10.0E-9                                 |                        | 89.69    |
| 100.0E-9                                |                        | 86.56    |
| 1.0E-6                                  |                        | 95.99    |
| 10.0E-6                                 |                        | 78.97    |
| <b>ETHAMBUTOL HYDROCHLORIDE</b>         |                        |          |
| 10.0E-9                                 |                        | 83.32    |
| 100.0E-9                                |                        | 86.12    |
| 1.0E-6                                  |                        | 100.24   |
| 10.0E-6                                 |                        | 104.73   |
| <b>ETHAMIVAN</b>                        |                        |          |
| 10.0E-9                                 |                        | 115.12   |
| 100.0E-9                                |                        | 112.70   |
| 1.0E-6                                  |                        | 110.91   |
| 10.0E-6                                 |                        | 121.57   |

| Compounds and Final Concentrations (M)   | Average of % Viability | Hits (✓) |
|------------------------------------------|------------------------|----------|
| <b>ETHAVERINE HYDROCHLORIDE</b>          |                        |          |
| 10.0E-9                                  |                        | 106.42   |
| 100.0E-9                                 |                        | 119.91   |
| 1.0E-6                                   |                        | 118.93   |
| 10.0E-6                                  |                        | 39.33    |
| <b>ETHINYL ESTRADIOL</b>                 |                        |          |
| 10.0E-9                                  |                        | 82.86    |
| 100.0E-9                                 |                        | 82.52    |
| 1.0E-6                                   |                        | 106.70   |
| 10.0E-6                                  |                        | 89.01    |
| <b>ETHIONAMIDE</b>                       |                        |          |
| 10.0E-9                                  |                        | 90.78    |
| 100.0E-9                                 |                        | 90.78    |
| 1.0E-6                                   |                        | 105.17   |
| 10.0E-6                                  |                        | 102.89   |
| <b>ETHIONINE</b>                         |                        |          |
| 10.0E-9                                  |                        | 120.76   |
| 100.0E-9                                 |                        | 114.99   |
| 1.0E-6                                   |                        | 133.13   |
| 10.0E-6                                  |                        | 122.19   |
| <b>ETHOPROPAZINE HYDROCHLORIDE</b>       |                        |          |
| 10.0E-9                                  |                        | 91.77    |
| 100.0E-9                                 |                        | 73.54    |
| 1.0E-6                                   |                        | 118.98   |
| 10.0E-6                                  |                        | 101.46   |
| <b>ETHOSUXIMIDE</b>                      |                        |          |
| 10.0E-9                                  |                        | 105.15   |
| 100.0E-9                                 |                        | 115.91   |
| 1.0E-6                                   |                        | 110.12   |
| 10.0E-6                                  |                        | 106.91   |
| <b>ETHOXYQUIN</b>                        |                        |          |
| 10.0E-9                                  |                        | 98.65    |
| 100.0E-9                                 |                        | 103.66   |
| 1.0E-6                                   |                        | 117.19   |
| 10.0E-6                                  |                        | 38.71    |
| <b>ETHOXZOLAMIDE</b>                     |                        |          |
| 10.0E-9                                  |                        | 98.65    |
| 100.0E-9                                 |                        | 113.21   |
| 1.0E-6                                   |                        | 95.18    |
| 10.0E-6                                  |                        | 1.89     |
| <b>ETHYL PARABEN</b>                     |                        |          |
| 10.0E-9                                  |                        | 119.49   |
| 100.0E-9                                 |                        | 112.45   |
| 1.0E-6                                   |                        | 126.88   |
| 10.0E-6                                  |                        | 100.08   |
| <b>ETHYLNOREPINEPHRINE HYDROCHLORIDE</b> |                        |          |
| 10.0E-9                                  |                        | 101.58   |
| 100.0E-9                                 |                        | 85.06    |
| 1.0E-6                                   |                        | 94.08    |
| 10.0E-6                                  |                        | 66.26    |
| <b>ETHYNODIOL DIACETATE</b>              |                        |          |
| 10.0E-9                                  |                        | 122.85   |
| 100.0E-9                                 |                        | 123.08   |
| 1.0E-6                                   |                        | 112.98   |
| 10.0E-6                                  |                        | 101.32   |
| <b>ETICLOPRIDE HYDROCHLORIDE</b>         |                        |          |
| 10.0E-9                                  |                        | 124.24   |
| 100.0E-9                                 |                        | 114.10   |
| 1.0E-6                                   |                        | 106.43   |
| 10.0E-6                                  |                        | 84.83    |
| <b>ETIDRONATE DISODIUM</b>               |                        |          |
| 10.0E-9                                  |                        | 121.76   |
| 100.0E-9                                 |                        | 109.68   |
| 1.0E-6                                   |                        | 121.60   |
| 10.0E-6                                  |                        | 113.55   |
| <b>ETODOLAC</b>                          |                        |          |
| 10.0E-9                                  |                        | 90.16    |
| 100.0E-9                                 |                        | 97.33    |
| 1.0E-6                                   |                        | 87.60    |
| 10.0E-6                                  |                        | 84.05    |
| <b>ETOMIDATE</b>                         |                        |          |
| 10.0E-9                                  |                        | 127.05   |
| 100.0E-9                                 |                        | 121.39   |
| 1.0E-6                                   |                        | 104.90   |
| 10.0E-6                                  |                        | 107.45   |
| <b>ETOPOSIDE</b>                         |                        |          |
| 10.0E-9                                  |                        | 112.75   |
| 100.0E-9                                 |                        | 66.17    |
| 1.0E-6                                   |                        | 1.76     |
| 10.0E-6                                  |                        | 1.94     |



| Compounds and Final Concentrations (M) | Average of % Viability | Hits (✓) |
|----------------------------------------|------------------------|----------|
| <b>EUCATROPINE HYDROCHLORIDE</b>       |                        |          |
| 10.0E-9                                |                        | 89.86    |
| 100.0E-9                               |                        | 76.06    |
| 1.0E-6                                 |                        | 98.63    |
| 10.0E-6                                |                        | 105.93   |
| <b>EUGENOL</b>                         |                        |          |
| 10.0E-9                                |                        | 87.89    |
| 100.0E-9                               |                        | 70.45    |
| 1.0E-6                                 |                        | 100.45   |
| 10.0E-6                                |                        | 102.45   |
| <b>EUPARIN</b>                         |                        |          |
| 10.0E-9                                |                        | 117.30   |
| 100.0E-9                               |                        | 123.80   |
| 1.0E-6                                 |                        | 118.69   |
| 10.0E-6                                |                        | 113.35   |
| <b>EUPHOL</b>                          |                        |          |
| 10.0E-9                                |                        | 124.11   |
| 100.0E-9                               |                        | 117.94   |
| 1.0E-6                                 |                        | 109.59   |
| 10.0E-6                                |                        | 55.26    |
| <b>EUPHOL ACETATE</b>                  |                        |          |
| 10.0E-9                                |                        | 128.14   |
| 100.0E-9                               |                        | 120.18   |
| 1.0E-6                                 |                        | 106.74   |
| 10.0E-6                                |                        | 94.53    |
| <b>EUPHORBIASTEROID</b>                |                        |          |
| 10.0E-9                                |                        | 115.68   |
| 100.0E-9                               |                        | 121.69   |
| 1.0E-6                                 |                        | 112.59   |
| 10.0E-6                                |                        | 120.23   |
| <b>EVANS BLUE</b>                      |                        |          |
| 10.0E-9                                |                        | 117.82   |
| 100.0E-9                               |                        | 102.23   |
| 1.0E-6                                 |                        | 89.33    |
| 10.0E-6                                |                        | 83.50    |
| <b>EVERNIC ACID</b>                    |                        |          |
| 10.0E-9                                |                        | 126.92   |
| 100.0E-9                               |                        | 137.53   |
| 1.0E-6                                 |                        | 111.73   |
| 10.0E-6                                |                        | 96.36    |
| <b>EVOXINE</b>                         |                        |          |
| 10.0E-9                                |                        | 113.94   |
| 100.0E-9                               |                        | 105.04   |
| 1.0E-6                                 |                        | 100.74   |
| 10.0E-6                                |                        | 93.73    |
| <b>EXALAMIDE</b>                       |                        |          |
| 10.0E-9                                |                        | 122.25   |
| 100.0E-9                               |                        | 120.41   |
| 1.0E-6                                 |                        | 106.75   |
| 10.0E-6                                |                        | 93.80    |
| <b>EXEMESTANE</b>                      |                        |          |
| 10.0E-9                                |                        | 121.81   |
| 100.0E-9                               |                        | 109.79   |
| 1.0E-6                                 |                        | 107.11   |
| 10.0E-6                                |                        | 102.62   |
| <b>EZETIMIBE</b>                       |                        |          |
| 10.0E-9                                |                        | 109.70   |
| 100.0E-9                               |                        | 112.68   |
| 1.0E-6                                 |                        | 98.70    |
| 10.0E-6                                |                        | 95.54    |
| <b>FAMCICLOVIR</b>                     |                        |          |
| 10.0E-9                                |                        | 128.67   |
| 100.0E-9                               |                        | 109.19   |
| 1.0E-6                                 |                        | 105.05   |
| 10.0E-6                                |                        | 106.32   |
| <b>FAMOTIDINE</b>                      |                        |          |
| 10.0E-9                                |                        | 88.23    |
| 100.0E-9                               |                        | 89.30    |
| 1.0E-6                                 |                        | 78.24    |
| 10.0E-6                                |                        | 91.96    |
| <b>FAMPRIDINE</b>                      |                        |          |
| 10.0E-9                                |                        | 84.54    |
| 100.0E-9                               |                        | 99.44    |
| 1.0E-6                                 |                        | 93.86    |
| 10.0E-6                                |                        | 93.55    |
| <b>FAMPROFAZONE</b>                    |                        |          |
| 10.0E-9                                |                        | 120.01   |
| 100.0E-9                               |                        | 117.08   |
| 1.0E-6                                 |                        | 115.48   |
| 10.0E-6                                |                        | 117.14   |

| Compounds and Final Concentrations (M) | Average of % Viability | Hits (✓) |
|----------------------------------------|------------------------|----------|
| <b>FARNESOL</b>                        |                        |          |
| 10.0E-9                                |                        | 85.07    |
| 100.0E-9                               |                        | 100.33   |
| 1.0E-6                                 |                        | 88.75    |
| 10.0E-6                                |                        | 80.38    |
| <b>FEBUXOSTAT</b>                      |                        |          |
| 10.0E-9                                |                        | 113.90   |
| 100.0E-9                               |                        | 114.95   |
| 1.0E-6                                 |                        | 100.93   |
| 10.0E-6                                |                        | 72.46    |
| <b>FENBENDAZOLE</b>                    |                        |          |
| 10.0E-9                                |                        | 105.18   |
| 100.0E-9                               |                        | 112.97   |
| 1.0E-6                                 |                        | 100.79   |
| 10.0E-6                                |                        | 1.19     |
| <b>FENBUFEN</b>                        |                        |          |
| 10.0E-9                                |                        | 89.71    |
| 100.0E-9                               |                        | 60.21    |
| 1.0E-6                                 |                        | 80.23    |
| 10.0E-6                                |                        | 85.80    |
| <b>FENBUTYRAMIDE</b>                   |                        |          |
| 10.0E-9                                |                        | 113.98   |
| 100.0E-9                               |                        | 121.64   |
| 1.0E-6                                 |                        | 129.78   |
| 10.0E-6                                |                        | 125.91   |
| <b>FENDILINE HYDROCHLORIDE</b>         |                        |          |
| 10.0E-9                                |                        | 114.27   |
| 100.0E-9                               |                        | 123.75   |
| 1.0E-6                                 |                        | 119.24   |
| 10.0E-6                                |                        | 89.53    |
| <b>FENOFIBRATE</b>                     |                        |          |
| 10.0E-9                                |                        | 109.71   |
| 100.0E-9                               |                        | 104.27   |
| 1.0E-6                                 |                        | 97.25    |
| 10.0E-6                                |                        | 85.11    |
| <b>FENOPROFEN</b>                      |                        |          |
| 10.0E-9                                |                        | 102.13   |
| 100.0E-9                               |                        | 97.73    |
| 1.0E-6                                 |                        | 94.08    |
| 10.0E-6                                |                        | 99.75    |
| <b>FENOTEROL HYDROBROMIDE</b>          |                        |          |
| 10.0E-9                                |                        | 97.47    |
| 100.0E-9                               |                        | 71.22    |
| 1.0E-6                                 |                        | 92.29    |
| 10.0E-6                                |                        | 85.10    |
| <b>FENRETINIDE</b>                     |                        |          |
| 10.0E-9                                |                        | 99.00    |
| 100.0E-9                               |                        | 99.10    |
| 1.0E-6                                 |                        | 89.92    |
| 10.0E-6                                |                        | 55.37    |
| <b>FENSPIRIDE HYDROCHLORIDE</b>        |                        |          |
| 10.0E-9                                |                        | 78.41    |
| 100.0E-9                               |                        | 89.56    |
| 1.0E-6                                 |                        | 89.38    |
| 10.0E-6                                |                        | 87.41    |
| <b>FERULIC ACID</b>                    |                        |          |
| 10.0E-9                                |                        | 105.83   |
| 100.0E-9                               |                        | 104.81   |
| 1.0E-6                                 |                        | 105.79   |
| 10.0E-6                                |                        | 111.84   |
| <b>FEXOFENADINE HYDROCHLORIDE</b>      |                        |          |
| 10.0E-9                                |                        | 98.62    |
| 100.0E-9                               |                        | 114.49   |
| 1.0E-6                                 |                        | 116.01   |
| 10.0E-6                                |                        | 106.37   |
| <b>FINASTERIDE</b>                     |                        |          |
| 10.0E-9                                |                        | 104.95   |
| 100.0E-9                               |                        | 98.02    |
| 1.0E-6                                 |                        | 85.38    |
| 10.0E-6                                |                        | 92.24    |
| <b>FIPEXIDE HYDROCHLORIDE</b>          |                        |          |
| 10.0E-9                                |                        | 106.17   |
| 100.0E-9                               |                        | 102.34   |
| 1.0E-6                                 |                        | 105.44   |
| 10.0E-6                                |                        | 111.15   |
| <b>FIPRONIL</b>                        |                        |          |
| 10.0E-9                                |                        | 81.02    |
| 100.0E-9                               |                        | 75.94    |
| 1.0E-6                                 |                        | 85.85    |
| 10.0E-6                                |                        | 75.83    |

| Compounds and Final Concentrations (M) | Average of % Viability | Hits (✓) |
|----------------------------------------|------------------------|----------|
| <b>FIROCOXIB</b>                       |                        |          |
| 10.0E-9                                |                        | 87.83    |
| 100.0E-9                               |                        | 95.74    |
| 1.0E-6                                 |                        | 82.81    |
| 10.0E-6                                |                        | 72.78    |
| <b>FISETIN</b>                         |                        |          |
| 10.0E-9                                |                        | 124.37   |
| 100.0E-9                               |                        | 126.88   |
| 1.0E-6                                 |                        | 113.49   |
| 10.0E-6                                |                        | 107.78   |
| <b>FISSINOLIDE</b>                     |                        |          |
| 10.0E-9                                |                        | 127.50   |
| 100.0E-9                               |                        | 125.12   |
| 1.0E-6                                 |                        | 109.95   |
| 10.0E-6                                |                        | 93.51    |
| <b>FLOPROPIONE</b>                     |                        |          |
| 10.0E-9                                |                        | 121.40   |
| 100.0E-9                               |                        | 115.63   |
| 1.0E-6                                 |                        | 113.45   |
| 10.0E-6                                |                        | 109.38   |
| <b>FLORFENICOL</b>                     |                        |          |
| 10.0E-9                                |                        | 112.29   |
| 100.0E-9                               |                        | 116.05   |
| 1.0E-6                                 |                        | 92.12    |
| 10.0E-6                                |                        | 66.10    |
| <b>FLOXURIDINE</b>                     |                        |          |
| 10.0E-9                                |                        | 123.46   |
| 100.0E-9                               |                        | 106.03   |
| 1.0E-6                                 |                        | 112.28   |
| 10.0E-6                                |                        | 101.35   |
| <b>FLUCONAZOLE</b>                     |                        |          |
| 10.0E-9                                |                        | 120.99   |
| 100.0E-9                               |                        | 120.47   |
| 1.0E-6                                 |                        | 122.97   |
| 10.0E-6                                |                        | 106.83   |
| <b>FLUCYTOSINE</b>                     |                        |          |
| 10.0E-9                                |                        | 106.76   |
| 100.0E-9                               |                        | 107.24   |
| 1.0E-6                                 |                        | 107.29   |
| 10.0E-6                                |                        | 64.27    |
| <b>FLUDARABINE PHOSPHATE</b>           |                        |          |
| 10.0E-9                                |                        | 120.22   |
| 100.0E-9                               |                        | 115.92   |
| 1.0E-6                                 |                        | 101.22   |
| 10.0E-6                                |                        | 89.41    |
| <b>FLUDROCORTISONE ACETATE</b>         |                        |          |
| 10.0E-9                                |                        | 92.41    |
| 100.0E-9                               |                        | 99.58    |
| 1.0E-6                                 |                        | 99.92    |
| 10.0E-6                                |                        | 91.97    |
| <b>FLUFENAMIC ACID</b>                 |                        |          |
| 10.0E-9                                |                        | 103.52   |
| 100.0E-9                               |                        | 104.39   |
| 1.0E-6                                 |                        | 97.12    |
| 10.0E-6                                |                        | 97.02    |
| <b>FLUMEQUINE</b>                      |                        |          |
| 10.0E-9                                |                        | 81.38    |
| 100.0E-9                               |                        | 91.37    |
| 1.0E-6                                 |                        | 72.25    |
| 10.0E-6                                |                        | 12.05    |
| <b>FLUMETHASONE</b>                    |                        |          |
| 10.0E-9                                |                        | 97.26    |
| 100.0E-9                               |                        | 121.73   |
| 1.0E-6                                 |                        | 114.88   |
| 10.0E-6                                |                        | 100.88   |
| <b>FLUMETHAZONE PIVALATE</b>           |                        |          |
| 10.0E-9                                |                        | 119.86   |
| 100.0E-9                               |                        | 105.81   |
| 1.0E-6                                 |                        | 96.48    |
| 10.0E-6                                |                        | 103.50   |
| <b>FLUNARIZINE HYDROCHLORIDE</b>       |                        |          |
| 10.0E-9                                |                        | 83.32    |
| 100.0E-9                               |                        | 83.15    |
| 1.0E-6                                 |                        | 67.10    |
| 10.0E-6                                |                        | 72.98    |
| <b>FLUNISOLIDE</b>                     |                        |          |
| 10.0E-9                                |                        | 116.36   |
| 100.0E-9                               |                        | 111.08   |
| 1.0E-6                                 |                        | 107.43   |
| 10.0E-6                                |                        | 94.77    |

| Compounds and Final Concentrations (M) | Average of % Viability | Hits (✓) |
|----------------------------------------|------------------------|----------|
| <b>FLUNIXIN MEGLUMINE</b>              |                        |          |
| 10.0E-9                                |                        | 120.00   |
| 100.0E-9                               |                        | 109.80   |
| 1.0E-6                                 |                        | 119.24   |
| 10.0E-6                                |                        | 101.97   |
| <b>FLUOCINOLONE ACETONIDE</b>          |                        |          |
| 10.0E-9                                |                        | 110.41   |
| 100.0E-9                               |                        | 101.33   |
| 1.0E-6                                 |                        | 94.28    |
| 10.0E-6                                |                        | 114.51   |
| <b>FLUOCINONIDE</b>                    |                        |          |
| 10.0E-9                                |                        | 101.48   |
| 100.0E-9                               |                        | 119.47   |
| 1.0E-6                                 |                        | 106.21   |
| 10.0E-6                                |                        | 106.62   |
| <b>FLUORESCEIN</b>                     |                        |          |
| 10.0E-9                                |                        | 107.59   |
| 100.0E-9                               |                        | 120.85   |
| 1.0E-6                                 |                        | 108.08   |
| 10.0E-6                                |                        | 108.25   |
| <b>FLUOROMETHOLONE</b>                 |                        |          |
| 10.0E-9                                |                        | 102.83   |
| 100.0E-9                               |                        | 104.06   |
| 1.0E-6                                 |                        | 96.93    |
| 10.0E-6                                |                        | 98.44    |
| <b>FLUOROURACIL</b>                    |                        |          |
| 10.0E-9                                |                        | 89.93    |
| 100.0E-9                               |                        | 100.63   |
| 1.0E-6                                 |                        | 21.32    |
| 10.0E-6                                |                        | 3.04     |
| <b>FLUOXETINE</b>                      |                        |          |
| 10.0E-9                                |                        | 84.99    |
| 100.0E-9                               |                        | 94.00    |
| 1.0E-6                                 |                        | 90.89    |
| 10.0E-6                                |                        | 73.20    |
| <b>FLUPHENAZINE HYDROCHLORIDE</b>      |                        |          |
| 10.0E-9                                |                        | 92.44    |
| 100.0E-9                               |                        | 85.88    |
| 1.0E-6                                 |                        | 71.32    |
| 10.0E-6                                |                        | 63.67    |
| <b>FLURANDRENOLIDE</b>                 |                        |          |
| 10.0E-9                                |                        | 97.24    |
| 100.0E-9                               |                        | 103.77   |
| 1.0E-6                                 |                        | 119.98   |
| 10.0E-6                                |                        | 99.77    |
| <b>FLURBIPROFEN</b>                    |                        |          |
| 10.0E-9                                |                        | 110.39   |
| 100.0E-9                               |                        | 100.81   |
| 1.0E-6                                 |                        | 114.17   |
| 10.0E-6                                |                        | 106.81   |
| <b>FLUROTHYL</b>                       |                        |          |
| 10.0E-9                                |                        | 123.23   |
| 100.0E-9                               |                        | 120.78   |
| 1.0E-6                                 |                        | 104.21   |
| 10.0E-6                                |                        | 111.71   |
| <b>FLUTAMIDE</b>                       |                        |          |
| 10.0E-9                                |                        | 86.33    |
| 100.0E-9                               |                        | 88.31    |
| 1.0E-6                                 |                        | 78.42    |
| 10.0E-6                                |                        | 81.93    |
| <b>FLUVASTATIN</b>                     |                        |          |
| 10.0E-9                                |                        | 118.14   |
| 100.0E-9                               |                        | 120.61   |
| 1.0E-6                                 |                        | 99.65    |
| 10.0E-6                                |                        | 86.29    |
| <b>FOLIC ACID</b>                      |                        |          |
| 10.0E-9                                |                        | 107.15   |
| 100.0E-9                               |                        | 102.82   |
| 1.0E-6                                 |                        | 114.55   |
| 10.0E-6                                |                        | 101.20   |
| <b>FOMEPIZOLE HYDROCHLORIDE</b>        |                        |          |
| 10.0E-9                                |                        | 118.01   |
| 100.0E-9                               |                        | 124.25   |
| 1.0E-6                                 |                        | 118.06   |
| 10.0E-6                                |                        | 133.27   |
| <b>FORMESTANE</b>                      |                        |          |
| 10.0E-9                                |                        | 114.83   |
| 100.0E-9                               |                        | 100.07   |
| 1.0E-6                                 |                        | 104.85   |
| 10.0E-6                                |                        | 93.18    |

| Compounds and Final Concentrations (M) | Average of % Viability | Hits (✓) |
|----------------------------------------|------------------------|----------|
| <b>FORMONONETIN</b>                    |                        |          |
| 10.0E-9                                |                        | 124.80   |
| 100.0E-9                               |                        | 134.04   |
| 1.0E-6                                 |                        | 113.95   |
| 10.0E-6                                |                        | 118.07   |
| <b>FOSCARNET SODIUM</b>                |                        |          |
| 10.0E-9                                |                        | 109.03   |
| 100.0E-9                               |                        | 117.64   |
| 1.0E-6                                 |                        | 115.00   |
| 10.0E-6                                |                        | 99.03    |
| <b>FOSFOMYCIN CALCIUM</b>              |                        |          |
| 10.0E-9                                |                        | 107.06   |
| 100.0E-9                               |                        | 106.92   |
| 1.0E-6                                 |                        | 114.42   |
| 10.0E-6                                |                        | 123.36   |
| <b>FOSFOSAL</b>                        |                        |          |
| 10.0E-9                                |                        | 102.06   |
| 100.0E-9                               |                        | 120.95   |
| 1.0E-6                                 |                        | 105.29   |
| 10.0E-6                                |                        | 116.95   |
| <b>FRIEDELIN</b>                       |                        |          |
| 10.0E-9                                |                        | 123.03   |
| 100.0E-9                               |                        | 118.08   |
| 1.0E-6                                 |                        | 109.65   |
| 10.0E-6                                |                        | 112.55   |
| <b>FTAXILIDE</b>                       |                        |          |
| 10.0E-9                                |                        | 92.24    |
| 100.0E-9                               |                        | 91.44    |
| 1.0E-6                                 |                        | 102.51   |
| 10.0E-6                                |                        | 94.01    |
| <b>FUCOSTANOL</b>                      |                        |          |
| 10.0E-9                                |                        | 105.94   |
| 100.0E-9                               |                        | 97.02    |
| 1.0E-6                                 |                        | 98.23    |
| 10.0E-6                                |                        | 57.12    |
| <b>FUMARPROTOCETRARIC ACID</b>         |                        |          |
| 10.0E-9                                |                        | 127.73   |
| 100.0E-9                               |                        | 105.31   |
| 1.0E-6                                 |                        | 74.33    |
| 10.0E-6                                |                        | 52.77    |
| <b>FUMAZENIL</b>                       |                        |          |
| 10.0E-9                                |                        | 108.31   |
| 100.0E-9                               |                        | 102.81   |
| 1.0E-6                                 |                        | 98.95    |
| 10.0E-6                                |                        | 94.14    |
| <b>FURALTADONE</b>                     |                        |          |
| 10.0E-9                                |                        | 106.28   |
| 100.0E-9                               |                        | 101.64   |
| 1.0E-6                                 |                        | 96.23    |
| 10.0E-6                                |                        | 80.29    |
| <b>FURAZOLIDONE</b>                    |                        |          |
| 10.0E-9                                |                        | 112.68   |
| 100.0E-9                               |                        | 101.71   |
| 1.0E-6                                 |                        | 108.44   |
| 10.0E-6                                |                        | 74.26    |
| <b>FUROSEMIDE</b>                      |                        |          |
| 10.0E-9                                |                        | 102.73   |
| 100.0E-9                               |                        | 84.56    |
| 1.0E-6                                 |                        | 110.31   |
| 10.0E-6                                |                        | 103.40   |
| <b>FUSARIC ACID</b>                    |                        |          |
| 10.0E-9                                |                        | 114.00   |
| 100.0E-9                               |                        | 118.49   |
| 1.0E-6                                 |                        | 119.52   |
| 10.0E-6                                |                        | 110.45   |
| <b>FUSIDIC ACID</b>                    |                        |          |
| 10.0E-9                                |                        | 100.58   |
| 100.0E-9                               |                        | 73.40    |
| 1.0E-6                                 |                        | 115.08   |
| 10.0E-6                                |                        | 107.56   |
| <b>GABAPENTIN</b>                      |                        |          |
| 10.0E-9                                |                        | 115.46   |
| 100.0E-9                               |                        | 111.02   |
| 1.0E-6                                 |                        | 113.95   |
| 10.0E-6                                |                        | 118.72   |
| <b>GALANGIN</b>                        |                        |          |
| 10.0E-9                                |                        | 109.85   |
| 100.0E-9                               |                        | 110.43   |
| 1.0E-6                                 |                        | 106.00   |
| 10.0E-6                                |                        | 106.40   |

| Compounds and Final Concentrations (M) | Average of % Viability | Hits (✓) |
|----------------------------------------|------------------------|----------|
| <b>GALANTHAMINE HYDROBROMIDE</b>       |                        |          |
| 10.0E-9                                |                        | 107.35   |
| 100.0E-9                               |                        | 108.26   |
| 1.0E-6                                 |                        | 107.20   |
| 10.0E-6                                |                        | 105.86   |
| <b>GALLAMINE TRIETHIODIDE</b>          |                        |          |
| 10.0E-9                                |                        | 89.80    |
| 100.0E-9                               |                        | 97.57    |
| 1.0E-6                                 |                        | 83.34    |
| 10.0E-6                                |                        | 92.89    |
| <b>GALLIC ACID</b>                     |                        |          |
| 10.0E-9                                |                        | 121.86   |
| 100.0E-9                               |                        | 110.98   |
| 1.0E-6                                 |                        | 102.54   |
| 10.0E-6                                |                        | 108.51   |
| <b>GAMBOGIC ACID</b>                   |                        |          |
| 10.0E-9                                |                        | 110.39   |
| 100.0E-9                               |                        | 115.92   |
| 1.0E-6                                 |                        | 0.00 ✓   |
| 10.0E-6                                |                        | -0.06    |
| <b>gamma-AMINOBUTYRIC ACID</b>         |                        |          |
| 10.0E-9                                |                        | 113.44   |
| 100.0E-9                               |                        | 121.01   |
| 1.0E-6                                 |                        | 112.78   |
| 10.0E-6                                |                        | 107.28   |
| <b>GANGALEOIDIN</b>                    |                        |          |
| 10.0E-9                                |                        | 126.77   |
| 100.0E-9                               |                        | 110.95   |
| 1.0E-6                                 |                        | 94.47    |
| 10.0E-6                                |                        | 87.21    |
| <b>GARCINOLIC ACID</b>                 |                        |          |
| 10.0E-9                                |                        | 102.58   |
| 100.0E-9                               |                        | 125.12   |
| 1.0E-6                                 |                        | 109.42   |
| 10.0E-6                                |                        | 108.05   |
| <b>GARLICIN</b>                        |                        |          |
| 10.0E-9                                |                        | 118.66   |
| 100.0E-9                               |                        | 117.16   |
| 1.0E-6                                 |                        | 121.60   |
| 10.0E-6                                |                        | 107.39   |
| <b>GATIFLOXACIN</b>                    |                        |          |
| 10.0E-9                                |                        | 122.72   |
| 100.0E-9                               |                        | 122.63   |
| 1.0E-6                                 |                        | 121.26   |
| 10.0E-6                                |                        | 102.64   |
| <b>GEDUNIN</b>                         |                        |          |
| 10.0E-9                                |                        | 126.35   |
| 100.0E-9                               |                        | 150.09   |
| 1.0E-6                                 |                        | 112.30 ✓ |
| 10.0E-6                                |                        | 44.67    |
| <b>GEDUNOL</b>                         |                        |          |
| 10.0E-9                                |                        | 102.11   |
| 100.0E-9                               |                        | 103.17   |
| 1.0E-6                                 |                        | 87.38    |
| 10.0E-6                                |                        | 69.90    |
| <b>GEMFIBROZIL</b>                     |                        |          |
| 10.0E-9                                |                        | 130.61   |
| 100.0E-9                               |                        | 107.85   |
| 1.0E-6                                 |                        | 103.58   |
| 10.0E-6                                |                        | 72.84    |
| <b>GEMIFLOXACIN MESYLATE</b>           |                        |          |
| 10.0E-9                                |                        | 122.33   |
| 100.0E-9                               |                        | 128.93   |
| 1.0E-6                                 |                        | 113.78   |
| 10.0E-6                                |                        | 91.39    |
| <b>GENETICIN</b>                       |                        |          |
| 10.0E-9                                |                        | 112.68   |
| 100.0E-9                               |                        | 114.95   |
| 1.0E-6                                 |                        | 104.73   |
| 10.0E-6                                |                        | 105.11   |
| <b>GENISTEIN</b>                       |                        |          |
| 10.0E-9                                |                        | 124.88   |
| 100.0E-9                               |                        | 141.88   |
| 1.0E-6                                 |                        | 108.84   |
| 10.0E-6                                |                        | 109.72   |
| <b>GENTAMICIN SULFATE</b>              |                        |          |
| 10.0E-9                                |                        | 106.71   |
| 100.0E-9                               |                        | 110.04   |
| 1.0E-6                                 |                        | 91.44    |
| 10.0E-6                                |                        | 93.98    |

| Compounds and Final Concentrations (M) | Average of % Viability | Hits (✓) |
|----------------------------------------|------------------------|----------|
| <b>GENTIAN VIOLET</b>                  |                        |          |
| 10.0E-9                                |                        | 112.08   |
| 100.0E-9                               |                        | 108.56   |
| 1.0E-6                                 |                        | 105.81   |
| 10.0E-6                                |                        | 0.63     |
| <b>GIBBERELIC ACID</b>                 |                        |          |
| 10.0E-9                                |                        | 112.33   |
| 100.0E-9                               |                        | 133.70   |
| 1.0E-6                                 |                        | 97.82    |
| 10.0E-6                                |                        | 118.52   |
| <b>GINKGOLIDE A</b>                    |                        |          |
| 10.0E-9                                |                        | 119.41   |
| 100.0E-9                               |                        | 134.05   |
| 1.0E-6                                 |                        | 116.51   |
| 10.0E-6                                |                        | 122.62   |
| <b>GITOXIGENIN DIACETATE</b>           |                        |          |
| 10.0E-9                                |                        | 106.44   |
| 100.0E-9                               |                        | 96.78    |
| 1.0E-6                                 |                        | 2.07     |
| 10.0E-6                                |                        | 1.93     |
| <b>GITOXIN</b>                         |                        |          |
| 10.0E-9                                |                        | 125.39   |
| 100.0E-9                               |                        | 118.70   |
| 1.0E-6                                 |                        | 1.77     |
| 10.0E-6                                |                        | 2.23     |
| <b>GLAFENINE</b>                       |                        |          |
| 10.0E-9                                |                        | 117.71   |
| 100.0E-9                               |                        | 124.24   |
| 1.0E-6                                 |                        | 120.30   |
| 10.0E-6                                |                        | 1.76     |
| <b>GLICLAZIDE</b>                      |                        |          |
| 10.0E-9                                |                        | 94.98    |
| 100.0E-9                               |                        | 100.85   |
| 1.0E-6                                 |                        | 109.53   |
| 10.0E-6                                |                        | 106.67   |
| <b>GLIPIZIDE</b>                       |                        |          |
| 10.0E-9                                |                        | 101.34   |
| 100.0E-9                               |                        | 117.79   |
| 1.0E-6                                 |                        | 119.46   |
| 10.0E-6                                |                        | 110.60   |
| <b>GLUCITOL-4-GUCOPYANOSIDE</b>        |                        |          |
| 10.0E-9                                |                        | 128.94   |
| 100.0E-9                               |                        | 109.17   |
| 1.0E-6                                 |                        | 98.60    |
| 10.0E-6                                |                        | 99.71    |
| <b>GLUCONOLACTONE</b>                  |                        |          |
| 10.0E-9                                |                        | 112.68   |
| 100.0E-9                               |                        | 112.08   |
| 1.0E-6                                 |                        | 117.39   |
| 10.0E-6                                |                        | 90.95    |
| <b>GLUCOSAMINE HYDROCHLORIDE</b>       |                        |          |
| 10.0E-9                                |                        | 107.20   |
| 100.0E-9                               |                        | 101.52   |
| 1.0E-6                                 |                        | 96.53    |
| 10.0E-6                                |                        | 107.26   |
| <b>GLUCOSAMINIC ACID</b>               |                        |          |
| 10.0E-9                                |                        | 135.52   |
| 100.0E-9                               |                        | 133.14   |
| 1.0E-6                                 |                        | 121.64   |
| 10.0E-6                                |                        | 112.18   |
| <b>GLUTAMINE (D)</b>                   |                        |          |
| 10.0E-9                                |                        | 126.27   |
| 100.0E-9                               |                        | 128.07   |
| 1.0E-6                                 |                        | 114.73   |
| 10.0E-6                                |                        | 122.09   |
| <b>GLUTAMINE (L)</b>                   |                        |          |
| 10.0E-9                                |                        | 100.22   |
| 100.0E-9                               |                        | 74.18    |
| 1.0E-6                                 |                        | 91.69    |
| 10.0E-6                                |                        | 84.95    |
| <b>GLUTATHIONE</b>                     |                        |          |
| 10.0E-9                                |                        | 93.80    |
| 100.0E-9                               |                        | 113.20   |
| 1.0E-6                                 |                        | 102.47   |
| 10.0E-6                                |                        | 111.87   |
| <b>GLYBURIDE</b>                       |                        |          |
| 10.0E-9                                |                        | 68.69    |
| 100.0E-9                               |                        | 81.93    |
| 1.0E-6                                 |                        | 75.06    |
| 10.0E-6                                |                        | 81.28    |

| Compounds and Final Concentrations (M)  | Average of % Viability | Hits (✓) |
|-----------------------------------------|------------------------|----------|
| <b>GLYCOCHOLIC ACID</b>                 |                        |          |
| 10.0E-9                                 |                        | 89.88    |
| 100.0E-9                                |                        | 90.39    |
| 1.0E-6                                  |                        | 100.57   |
| 10.0E-6                                 |                        | 84.03    |
| <b>GLYCOPYRROLATE</b>                   |                        |          |
| 10.0E-9                                 |                        | 98.66    |
| 100.0E-9                                |                        | 93.96    |
| 1.0E-6                                  |                        | 87.37    |
| 10.0E-6                                 |                        | 93.24    |
| <b>GLYCYRRHIZIC ACID, AMMONIUM SALT</b> |                        |          |
| 10.0E-9                                 |                        | 105.15   |
| 100.0E-9                                |                        | 110.87   |
| 1.0E-6                                  |                        | 108.34   |
| 10.0E-6                                 |                        | 118.87   |
| <b>GOSSYPETIN</b>                       |                        |          |
| 10.0E-9                                 |                        | 114.73   |
| 100.0E-9                                |                        | 109.66   |
| 1.0E-6                                  |                        | 108.79   |
| 10.0E-6                                 |                        | 71.61    |
| <b>GOSSYPIN</b>                         |                        |          |
| 10.0E-9                                 |                        | 115.32   |
| 100.0E-9                                |                        | 117.65   |
| 1.0E-6                                  |                        | 115.82   |
| 10.0E-6                                 |                        | 116.33   |
| <b>GOSSYPOL</b>                         |                        |          |
| 10.0E-9                                 |                        | 108.86   |
| 100.0E-9                                |                        | 116.13   |
| 1.0E-6                                  |                        | 116.52   |
| 10.0E-6                                 |                        | 83.79    |
| <b>GRAMICIDIN</b>                       |                        |          |
| 10.0E-9                                 |                        | 102.29   |
| 100.0E-9                                |                        | 113.75   |
| 1.0E-6                                  |                        | 1.98     |
| 10.0E-6                                 |                        | 2.17     |
| <b>GRAMINE</b>                          |                        |          |
| 10.0E-9                                 |                        | 124.28   |
| 100.0E-9                                |                        | 123.84   |
| 1.0E-6                                  |                        | 109.24   |
| 10.0E-6                                 |                        | 95.53    |
| <b>GRISEOFULVIN</b>                     |                        |          |
| 10.0E-9                                 |                        | 105.00   |
| 100.0E-9                                |                        | 118.90   |
| 1.0E-6                                  |                        | 107.24   |
| 10.0E-6                                 |                        | 79.93    |
| <b>GUAIFENESIN</b>                      |                        |          |
| 10.0E-9                                 |                        | 105.05   |
| 100.0E-9                                |                        | 104.22   |
| 1.0E-6                                  |                        | 97.04    |
| 10.0E-6                                 |                        | 96.83    |
| <b>GUAJOL(-)</b>                        |                        |          |
| 10.0E-9                                 |                        | 120.65   |
| 100.0E-9                                |                        | 117.29   |
| 1.0E-6                                  |                        | 116.41   |
| 10.0E-6                                 |                        | 116.06   |
| <b>GUANABENZ ACETATE</b>                |                        |          |
| 10.0E-9                                 |                        | 110.97   |
| 100.0E-9                                |                        | 87.44    |
| 1.0E-6                                  |                        | 96.19    |
| 10.0E-6                                 |                        | 110.70   |
| <b>GUANETHIDINE SULFATE</b>             |                        |          |
| 10.0E-9                                 |                        | 119.60   |
| 100.0E-9                                |                        | 78.22    |
| 1.0E-6                                  |                        | 104.64   |
| 10.0E-6                                 |                        | 116.11   |
| <b>GUANFACINE</b>                       |                        |          |
| 10.0E-9                                 |                        | 99.17    |
| 100.0E-9                                |                        | 96.65    |
| 1.0E-6                                  |                        | 107.10   |
| 10.0E-6                                 |                        | 121.83   |
| <b>GYROMITRIN</b>                       |                        |          |
| 10.0E-9                                 |                        | 93.68    |
| 100.0E-9                                |                        | 107.35   |
| 1.0E-6                                  |                        | 110.09   |
| 10.0E-6                                 |                        | 109.44   |
| <b>HAEMATOMMIC ACID</b>                 |                        |          |
| 10.0E-9                                 |                        | 130.58   |
| 100.0E-9                                |                        | 138.80   |
| 1.0E-6                                  |                        | 115.20   |
| 10.0E-6                                 |                        | 107.17   |



| Compounds and Final Concentrations (M) | Average of % Viability | Hits (✓) |
|----------------------------------------|------------------------|----------|
| <b>HAEMATOMIC ACID, ETHYL ESTER</b>    |                        |          |
| 10.0E-9                                |                        | 102.81   |
| 100.0E-9                               |                        | 126.01   |
| 1.0E-6                                 |                        | 121.75   |
| 10.0E-6                                |                        | 100.74   |
| <b>HAEMATOPORPHYRIN</b>                |                        |          |
| 10.0E-9                                |                        | 99.97    |
| 100.0E-9                               |                        | 104.34   |
| 1.0E-6                                 |                        | 109.48   |
| 10.0E-6                                |                        | 111.38   |
| <b>HAEMATOXYLIN</b>                    |                        |          |
| 10.0E-9                                |                        | 97.34    |
| 100.0E-9                               |                        | 104.76   |
| 1.0E-6                                 |                        | 98.72    |
| 10.0E-6                                |                        | 73.51    |
| <b>HAEMATOXYLIN PENTAACETATE</b>       |                        |          |
| 10.0E-9                                |                        | 132.03   |
| 100.0E-9                               |                        | 113.60   |
| 1.0E-6                                 |                        | 108.14   |
| 10.0E-6                                |                        | 98.29    |
| <b>HALAZONE</b>                        |                        |          |
| 10.0E-9                                |                        | 110.61   |
| 100.0E-9                               |                        | 70.89    |
| 1.0E-6                                 |                        | 98.35    |
| 10.0E-6                                |                        | 95.32    |
| <b>HALCINONIDE</b>                     |                        |          |
| 10.0E-9                                |                        | 96.27    |
| 100.0E-9                               |                        | 94.10    |
| 1.0E-6                                 |                        | 97.08    |
| 10.0E-6                                |                        | 78.87    |
| <b>HALOPERIDOL</b>                     |                        |          |
| 10.0E-9                                |                        | 127.04   |
| 100.0E-9                               |                        | 103.43   |
| 1.0E-6                                 |                        | 79.11    |
| 10.0E-6                                |                        | 80.81    |
| <b>HALOTHANE</b>                       |                        |          |
| 10.0E-9                                |                        | 95.91    |
| 100.0E-9                               |                        | 104.56   |
| 1.0E-6                                 |                        | 102.28   |
| 10.0E-6                                |                        | 96.40    |
| <b>HARMALINE</b>                       |                        |          |
| 10.0E-9                                |                        | 124.41   |
| 100.0E-9                               |                        | 118.68   |
| 1.0E-6                                 |                        | 61.18    |
| 10.0E-6                                |                        | 2.84     |
| <b>HARMALOL HYDROCHLORIDE</b>          |                        |          |
| 10.0E-9                                |                        | 116.02   |
| 100.0E-9                               |                        | 96.22    |
| 1.0E-6                                 |                        | 111.72   |
| 10.0E-6                                |                        | 108.65   |
| <b>HARMANE</b>                         |                        |          |
| 10.0E-9                                |                        | 112.51   |
| 100.0E-9                               |                        | 123.10   |
| 1.0E-6                                 |                        | 117.83   |
| 10.0E-6                                |                        | 121.66   |
| <b>HARMINE</b>                         |                        |          |
| 10.0E-9                                |                        | 119.71   |
| 100.0E-9                               |                        | 141.43   |
| 1.0E-6                                 |                        | 103.04   |
| 10.0E-6                                |                        | 65.30    |
| <b>HARMOL HYDROCHLORIDE</b>            |                        |          |
| 10.0E-9                                |                        | 120.51   |
| 100.0E-9                               |                        | 111.73   |
| 1.0E-6                                 |                        | 101.16   |
| 10.0E-6                                |                        | 102.63   |
| <b>HARPAGOSIDE</b>                     |                        |          |
| 10.0E-9                                |                        | 122.19   |
| 100.0E-9                               |                        | 120.37   |
| 1.0E-6                                 |                        | 116.77   |
| 10.0E-6                                |                        | 108.14   |
| <b>HECOGENIN</b>                       |                        |          |
| 10.0E-9                                |                        | 81.14    |
| 100.0E-9                               |                        | 46.75    |
| 1.0E-6                                 |                        | 9.96     |
| 10.0E-6                                |                        | 1.87     |
| <b>HECOGENIN ACETATE</b>               |                        |          |
| 10.0E-9                                |                        | 92.34    |
| 100.0E-9                               |                        | 89.89    |
| 1.0E-6                                 |                        | 87.81    |
| 10.0E-6                                |                        | 77.95    |

| Compounds and Final Concentrations (M) | Average of % Viability | Hits (✓) |
|----------------------------------------|------------------------|----------|
| <b>HEDERACOSIDE C</b>                  |                        |          |
| 10.0E-9                                |                        | 112.31   |
| 100.0E-9                               |                        | 108.69   |
| 1.0E-6                                 |                        | 94.50    |
| 10.0E-6                                |                        | 112.78   |
| <b>HEDERAGENIN</b>                     |                        |          |
| 10.0E-9                                |                        | 112.96   |
| 100.0E-9                               |                        | 112.55   |
| 1.0E-6                                 |                        | 106.07   |
| 10.0E-6                                |                        | 107.87   |
| <b>HELENINE</b>                        |                        |          |
| 10.0E-9                                |                        | 116.97   |
| 100.0E-9                               |                        | 127.46   |
| 1.0E-6                                 |                        | 92.28    |
| 10.0E-6                                |                        | 0.63     |
| <b>HELICIN</b>                         |                        |          |
| 10.0E-9                                |                        | 99.24    |
| 100.0E-9                               |                        | 96.66    |
| 1.0E-6                                 |                        | 95.93    |
| 10.0E-6                                |                        | 93.67    |
| <b>HEMATEIN</b>                        |                        |          |
| 10.0E-9                                |                        | 125.03   |
| 100.0E-9                               |                        | 126.76   |
| 1.0E-6                                 |                        | 107.20   |
| 10.0E-6                                |                        | 82.94    |
| <b>HEMICHOLINIUM BROMIDE</b>           |                        |          |
| 10.0E-9                                |                        | 113.49   |
| 100.0E-9                               |                        | 124.14   |
| 1.0E-6                                 |                        | 118.20   |
| 10.0E-6                                |                        | 119.95   |
| <b>HEPTAMINOL HYDROCHLORIDE</b>        |                        |          |
| 10.0E-9                                |                        | 137.13   |
| 100.0E-9                               |                        | 122.31   |
| 1.0E-6                                 |                        | 128.13   |
| 10.0E-6                                |                        | 121.69   |
| <b>HESPERETIN</b>                      |                        |          |
| 10.0E-9                                |                        | 124.76   |
| 100.0E-9                               |                        | 132.81   |
| 1.0E-6                                 |                        | 115.91   |
| 10.0E-6                                |                        | 108.16   |
| <b>HESPERIDIN</b>                      |                        |          |
| 10.0E-9                                |                        | 112.32   |
| 100.0E-9                               |                        | 136.77   |
| 1.0E-6                                 |                        | 112.43   |
| 10.0E-6                                |                        | 119.01   |
| <b>HETACILLIN POTASSIUM</b>            |                        |          |
| 10.0E-9                                |                        | 123.54   |
| 100.0E-9                               |                        | 108.64   |
| 1.0E-6                                 |                        | 100.37   |
| 10.0E-6                                |                        | 99.90    |
| <b>HETEROPEUCENIN, METHYL ETHER</b>    |                        |          |
| 10.0E-9                                |                        | 127.81   |
| 100.0E-9                               |                        | 127.41   |
| 1.0E-6                                 |                        | 111.39   |
| 10.0E-6                                |                        | 71.75    |
| <b>HEXACHLOROPHENE</b>                 |                        |          |
| 10.0E-9                                |                        | 117.81   |
| 100.0E-9                               |                        | 100.48   |
| 1.0E-6                                 |                        | 97.16    |
| 10.0E-6                                |                        | 94.11    |
| <b>HEXAMETHONIUM BROMIDE</b>           |                        |          |
| 10.0E-9                                |                        | 116.77   |
| 100.0E-9                               |                        | 106.26   |
| 1.0E-6                                 |                        | 104.60   |
| 10.0E-6                                |                        | 111.06   |
| <b>HEXAMETHYLQUERCETAGETIN</b>         |                        |          |
| 10.0E-9                                |                        | 100.62   |
| 100.0E-9                               |                        | 93.68    |
| 1.0E-6                                 |                        | 91.70    |
| 10.0E-6                                |                        | 87.53    |
| <b>HEXESTROL</b>                       |                        |          |
| 10.0E-9                                |                        | 92.30    |
| 100.0E-9                               |                        | 104.79   |
| 1.0E-6                                 |                        | 103.21   |
| 10.0E-6                                |                        | 108.78   |
| <b>HEXETIDINE</b>                      |                        |          |
| 10.0E-9                                |                        | 119.44   |
| 100.0E-9                               |                        | 113.89   |
| 1.0E-6                                 |                        | 111.01   |
| 10.0E-6                                |                        | 38.13    |

| Compounds and Final Concentrations (M) | Average of % Viability | Hits (✓) |
|----------------------------------------|------------------------|----------|
| <b>HEXYLRESORCINOL</b>                 |                        |          |
| 10.0E-9                                |                        | 109.43   |
| 100.0E-9                               |                        | 116.69   |
| 1.0E-6                                 |                        | 101.59   |
| 10.0E-6                                |                        | 93.01    |
| <b>HIERACIN</b>                        |                        |          |
| 10.0E-9                                |                        | 100.80   |
| 100.0E-9                               |                        | 97.35    |
| 1.0E-6                                 |                        | 106.23   |
| 10.0E-6                                |                        | 64.45    |
| <b>HISTAMINE DIHYDROCHLORIDE</b>       |                        |          |
| 10.0E-9                                |                        | 104.59   |
| 100.0E-9                               |                        | 110.60   |
| 1.0E-6                                 |                        | 108.26   |
| 10.0E-6                                |                        | 104.32   |
| <b>HOMATROPINE BROMIDE</b>             |                        |          |
| 10.0E-9                                |                        | 109.60   |
| 100.0E-9                               |                        | 104.80   |
| 1.0E-6                                 |                        | 95.07    |
| 10.0E-6                                |                        | 99.73    |
| <b>HOMATROPINE METHYLBROMIDE</b>       |                        |          |
| 10.0E-9                                |                        | 112.34   |
| 100.0E-9                               |                        | 102.34   |
| 1.0E-6                                 |                        | 93.98    |
| 10.0E-6                                |                        | 99.53    |
| <b>HOMIDIUM BROMIDE</b>                |                        |          |
| 10.0E-9                                |                        | 110.29   |
| 100.0E-9                               |                        | 76.65    |
| 1.0E-6                                 |                        | 17.94    |
| 10.0E-6                                |                        | 0.82     |
| <b>HOMOPTEROCARPIN</b>                 |                        |          |
| 10.0E-9                                |                        | 122.23   |
| 100.0E-9                               |                        | 119.18   |
| 1.0E-6                                 |                        | 117.75   |
| 10.0E-6                                |                        | 108.27   |
| <b>HOMOSALATE</b>                      |                        |          |
| 10.0E-9                                |                        | 119.89   |
| 100.0E-9                               |                        | 120.23   |
| 1.0E-6                                 |                        | 121.89   |
| 10.0E-6                                |                        | 109.94   |
| <b>HUMULENE (alpha)</b>                |                        |          |
| 10.0E-9                                |                        | 121.16   |
| 100.0E-9                               |                        | 139.81   |
| 1.0E-6                                 |                        | 129.91   |
| 10.0E-6                                |                        | 94.02    |
| <b>HUPERZINE A</b>                     |                        |          |
| 10.0E-9                                |                        | 106.78   |
| 100.0E-9                               |                        | 108.90   |
| 1.0E-6                                 |                        | 96.46    |
| 10.0E-6                                |                        | 107.47   |
| <b>HYCANTHONE</b>                      |                        |          |
| 10.0E-9                                |                        | 91.06    |
| 100.0E-9                               |                        | 89.78    |
| 1.0E-6                                 |                        | 86.23    |
| 10.0E-6                                |                        | 7.08     |
| <b>HYDRALAZINE HYDROCHLORIDE</b>       |                        |          |
| 10.0E-9                                |                        | 117.95   |
| 100.0E-9                               |                        | 100.99   |
| 1.0E-6                                 |                        | 116.28   |
| 10.0E-6                                |                        | 89.30    |
| <b>HYDRASTINE (1R, 9S)</b>             |                        |          |
| 10.0E-9                                |                        | 118.25   |
| 100.0E-9                               |                        | 106.12   |
| 1.0E-6                                 |                        | 103.66   |
| 10.0E-6                                |                        | 95.56    |
| <b>HYDRASTININE HYDROCHLORIDE</b>      |                        |          |
| 10.0E-9                                |                        | 101.67   |
| 100.0E-9                               |                        | 107.65   |
| 1.0E-6                                 |                        | 101.28   |
| 10.0E-6                                |                        | 98.27    |
| <b>HYDRINDANTIN HYDRATE</b>            |                        |          |
| 10.0E-9                                |                        | 92.46    |
| 100.0E-9                               |                        | 113.51   |
| 1.0E-6                                 |                        | 105.44   |
| 10.0E-6                                |                        | 4.23     |
| <b>HYDROCHLOROTHIAZIDE</b>             |                        |          |
| 10.0E-9                                |                        | 116.40   |
| 100.0E-9                               |                        | 89.00    |
| 1.0E-6                                 |                        | 104.66   |
| 10.0E-6                                |                        | 120.23   |

| Compounds and Final Concentrations (M)        | Average of % Viability | Hits (✓) |
|-----------------------------------------------|------------------------|----------|
| <b>HYDROCORTISONE</b>                         |                        |          |
| 10.0E-9                                       |                        | 114.12   |
| 100.0E-9                                      |                        | 111.03   |
| 1.0E-6                                        |                        | 107.78   |
| 10.0E-6                                       |                        | 97.14    |
| <b>HYDROCORTISONE ACETATE</b>                 |                        |          |
| 10.0E-9                                       |                        | 118.43   |
| 100.0E-9                                      |                        | 66.39    |
| 1.0E-6                                        |                        | 109.10   |
| 10.0E-6                                       |                        | 106.95   |
| <b>HYDROCORTISONE BUTYRATE</b>                |                        |          |
| 10.0E-9                                       |                        | 100.41   |
| 100.0E-9                                      |                        | 97.79    |
| 1.0E-6                                        |                        | 115.65   |
| 10.0E-6                                       |                        | 105.42   |
| <b>HYDROCORTISONE HEMISUCCINATE</b>           |                        |          |
| 10.0E-9                                       |                        | 95.08    |
| 100.0E-9                                      |                        | 93.51    |
| 1.0E-6                                        |                        | 91.65    |
| 10.0E-6                                       |                        | 101.31   |
| <b>HYDROCORTISONE PHOSPHATE TRIETHYLAMINE</b> |                        |          |
| 10.0E-9                                       |                        | 122.50   |
| 100.0E-9                                      |                        | 108.94   |
| 1.0E-6                                        |                        | 99.87    |
| 10.0E-6                                       |                        | 107.63   |
| <b>HYDROCORTISONE VALERATE</b>                |                        |          |
| 10.0E-9                                       |                        | 95.71    |
| 100.0E-9                                      |                        | 81.63    |
| 1.0E-6                                        |                        | 94.28    |
| 10.0E-6                                       |                        | 85.75    |
| <b>HYDROFLUMETHIAZIDE</b>                     |                        |          |
| 10.0E-9                                       |                        | 107.92   |
| 100.0E-9                                      |                        | 105.38   |
| 1.0E-6                                        |                        | 106.50   |
| 10.0E-6                                       |                        | 109.75   |
| <b>HYDROLYSIS PRODUCT OF BUSSEIN</b>          |                        |          |
| 10.0E-9                                       |                        | 116.26   |
| 100.0E-9                                      |                        | 130.55   |
| 1.0E-6                                        |                        | 115.68   |
| 10.0E-6                                       |                        | 114.87   |
| <b>HYDROQUINIDINE</b>                         |                        |          |
| 10.0E-9                                       |                        | 110.58   |
| 100.0E-9                                      |                        | 116.00   |
| 1.0E-6                                        |                        | 109.85   |
| 10.0E-6                                       |                        | 95.09    |
| <b>HYDROQUININE HYDROBROMIDE HYDRATE</b>      |                        |          |
| 10.0E-9                                       |                        | 73.60    |
| 100.0E-9                                      |                        | 97.33    |
| 1.0E-6                                        |                        | 108.86   |
| 10.0E-6                                       |                        | 90.62    |
| <b>HYDROQUINONE</b>                           |                        |          |
| 10.0E-9                                       |                        | 108.25   |
| 100.0E-9                                      |                        | 115.53   |
| 1.0E-6                                        |                        | 105.41   |
| 10.0E-6                                       |                        | 13.83    |
| <b>HYDROXYCHLOROQUINE SULFATE</b>             |                        |          |
| 10.0E-9                                       |                        | 102.43   |
| 100.0E-9                                      |                        | 111.13   |
| 1.0E-6                                        |                        | 133.02   |
| 10.0E-6                                       |                        | 83.57    |
| <b>HYDROXYPROGESTERONE</b>                    |                        |          |
| 10.0E-9                                       |                        | 115.10   |
| 100.0E-9                                      |                        | 132.78   |
| 1.0E-6                                        |                        | 121.13   |
| 10.0E-6                                       |                        | 106.78   |
| <b>HYDROXYTOLUIC ACID</b>                     |                        |          |
| 10.0E-9                                       |                        | 121.19   |
| 100.0E-9                                      |                        | 119.76   |
| 1.0E-6                                        |                        | 114.30   |
| 10.0E-6                                       |                        | 108.14   |
| <b>HYDROXYUREA</b>                            |                        |          |
| 10.0E-9                                       |                        | 26.72    |
| 100.0E-9                                      |                        | 107.46   |
| 1.0E-6                                        |                        | 102.68   |
| 10.0E-6                                       |                        | 96.62    |
| <b>HYDROXYZINE PAMOATE</b>                    |                        |          |
| 10.0E-9                                       |                        | 107.70   |
| 100.0E-9                                      |                        | 101.16   |
| 1.0E-6                                        |                        | 102.17   |
| 10.0E-6                                       |                        | 89.08    |

| Compounds and Final Concentrations (M)      | Average of % Viability | Hits (✓) |
|---------------------------------------------|------------------------|----------|
| <b>HYMECROMONE METHYL ETHER</b>             |                        |          |
| 10.0E-9                                     |                        | 110.98   |
| 100.0E-9                                    |                        | 94.60    |
| 1.0E-6                                      |                        | 93.61    |
| 10.0E-6                                     |                        | 91.34    |
| <b>HYOSCYAMINE</b>                          |                        |          |
| 10.0E-9                                     |                        | 111.65   |
| 100.0E-9                                    |                        | 102.35   |
| 1.0E-6                                      |                        | 100.86   |
| 10.0E-6                                     |                        | 102.84   |
| <b>HYPOXANTHINE</b>                         |                        |          |
| 10.0E-9                                     |                        | 112.03   |
| 100.0E-9                                    |                        | 115.91   |
| 1.0E-6                                      |                        | 120.23   |
| 10.0E-6                                     |                        | 117.60   |
| <b>IBANDRONATE SODIUM</b>                   |                        |          |
| 10.0E-9                                     |                        | 124.36   |
| 100.0E-9                                    |                        | 129.25   |
| 1.0E-6                                      |                        | 108.47   |
| 10.0E-6                                     |                        | 120.16   |
| <b>IBUPROFEN</b>                            |                        |          |
| 10.0E-9                                     |                        | 116.64   |
| 100.0E-9                                    |                        | 99.45    |
| 1.0E-6                                      |                        | 102.43   |
| 10.0E-6                                     |                        | 101.16   |
| <b>ICARIIN</b>                              |                        |          |
| 10.0E-9                                     |                        | 127.15   |
| 100.0E-9                                    |                        | 115.34   |
| 1.0E-6                                      |                        | 113.07   |
| 10.0E-6                                     |                        | 114.83   |
| <b>IDAZOXAN HYDROCHLORIDE</b>               |                        |          |
| 10.0E-9                                     |                        | 108.69   |
| 100.0E-9                                    |                        | 121.57   |
| 1.0E-6                                      |                        | 98.42    |
| 10.0E-6                                     |                        | 5.62     |
| <b>IDEBENONE</b>                            |                        |          |
| 10.0E-9                                     |                        | 119.24   |
| 100.0E-9                                    |                        | 120.37   |
| 1.0E-6                                      |                        | 111.04   |
| 10.0E-6                                     |                        | 97.43    |
| <b>IFOSFAMIDE</b>                           |                        |          |
| 10.0E-9                                     |                        | 116.13   |
| 100.0E-9                                    |                        | 112.44   |
| 1.0E-6                                      |                        | 120.66   |
| 10.0E-6                                     |                        | 106.87   |
| <b>IMIDAZOL-4-YLACETIC ACID SODIUM SALT</b> |                        |          |
| 10.0E-9                                     |                        | 122.84   |
| 100.0E-9                                    |                        | 128.92   |
| 1.0E-6                                      |                        | 120.72   |
| 10.0E-6                                     |                        | 118.20   |
| <b>IMIPRAMINE HYDROCHLORIDE</b>             |                        |          |
| 10.0E-9                                     |                        | 107.04   |
| 100.0E-9                                    |                        | 78.22    |
| 1.0E-6                                      |                        | 108.40   |
| 10.0E-6                                     |                        | 87.59    |
| <b>INDAPAMIDE</b>                           |                        |          |
| 10.0E-9                                     |                        | 50.19    |
| 100.0E-9                                    |                        | 68.35    |
| 1.0E-6                                      |                        | 62.76    |
| 10.0E-6                                     |                        | 44.39    |
| <b>INDOLE-3-CARBINOL</b>                    |                        |          |
| 10.0E-9                                     |                        | 118.79   |
| 100.0E-9                                    |                        | 109.01   |
| 1.0E-6                                      |                        | 98.47    |
| 10.0E-6                                     |                        | 72.95    |
| <b>INDOMETHACIN</b>                         |                        |          |
| 10.0E-9                                     |                        | 106.42   |
| 100.0E-9                                    |                        | 97.19    |
| 1.0E-6                                      |                        | 79.85    |
| 10.0E-6                                     |                        | 96.04    |
| <b>INDOPROFEN</b>                           |                        |          |
| 10.0E-9                                     |                        | 130.92   |
| 100.0E-9                                    |                        | 119.94   |
| 1.0E-6                                      |                        | 98.22    |
| 10.0E-6                                     |                        | 93.69    |
| <b>INOSITOL</b>                             |                        |          |
| 10.0E-9                                     |                        | 112.55   |
| 100.0E-9                                    |                        | 88.78    |
| 1.0E-6                                      |                        | 98.69    |
| 10.0E-6                                     |                        | 106.64   |

| Compounds and Final Concentrations (M) | Average of % Viability                                                                | Hits (✓) |
|----------------------------------------|---------------------------------------------------------------------------------------|----------|
| <b>IODIPAMIDE</b>                      |                                                                                       |          |
| 10.0E-9                                |    | 107.72   |
| 100.0E-9                               |    | 98.02    |
| 1.0E-6                                 |    | 97.68    |
| 10.0E-6                                |    | 100.42   |
| <b>ODOQUINOL</b>                       |                                                                                       |          |
| 10.0E-9                                |    | 101.05   |
| 100.0E-9                               |    | 97.62    |
| 1.0E-6                                 |    | 98.21    |
| 10.0E-6                                |    | 97.17    |
| <b>IOPANIC ACID</b>                    |                                                                                       |          |
| 10.0E-9                                |    | 107.85   |
| 100.0E-9                               |    | 104.32   |
| 1.0E-6                                 |    | 106.69   |
| 10.0E-6                                |    | 93.52    |
| <b>IPRATROPIUM BROMIDE</b>             |                                                                                       |          |
| 10.0E-9                                |    | 100.36   |
| 100.0E-9                               |    | 98.88    |
| 1.0E-6                                 |    | 102.71   |
| 10.0E-6                                |    | 106.98   |
| <b>IPRIFLAVONE</b>                     |                                                                                       |          |
| 10.0E-9                                |    | 122.53   |
| 100.0E-9                               |    | 108.95   |
| 1.0E-6                                 |    | 109.21   |
| 10.0E-6                                |    | 108.51   |
| <b>IPRONIAZID SULFATE</b>              |                                                                                       |          |
| 10.0E-9                                |    | 131.58   |
| 100.0E-9                               |    | 126.84   |
| 1.0E-6                                 |    | 113.57   |
| 10.0E-6                                |    | 119.74   |
| <b>IRBESARTAN</b>                      |                                                                                       |          |
| 10.0E-9                                |    | 133.08   |
| 100.0E-9                               |    | 123.57   |
| 1.0E-6                                 |    | 107.94   |
| 10.0E-6                                |    | 113.35   |
| <b>IRETOL</b>                          |                                                                                       |          |
| 10.0E-9                                |   | 112.30   |
| 100.0E-9                               |  | 136.71   |
| 1.0E-6                                 |  | 128.65   |
| 10.0E-6                                |  | 108.67   |
| <b>IRIDIN</b>                          |                                                                                       |          |
| 10.0E-9                                |  | 111.83   |
| 100.0E-9                               |  | 128.33   |
| 1.0E-6                                 |  | 124.89   |
| 10.0E-6                                |  | 116.99   |
| <b>IRIGENIN</b>                        |                                                                                       |          |
| 10.0E-9                                |  | 122.85   |
| 100.0E-9                               |  | 109.49   |
| 1.0E-6                                 |  | 86.16    |
| 10.0E-6                                |  | 56.33    |
| <b>IRIGENIN TRIMETHYL ETHER</b>        |                                                                                       |          |
| 10.0E-9                                |  | 116.67   |
| 100.0E-9                               |  | 130.03   |
| 1.0E-6                                 |  | 124.75   |
| 10.0E-6                                |  | 110.05   |
| <b>IRIGENIN, 7-BENZYL ETHER</b>        |                                                                                       |          |
| 10.0E-9                                |  | 144.09   |
| 100.0E-9                               |  | 123.60   |
| 1.0E-6                                 |  | 126.44   |
| 10.0E-6                                |  | 103.91   |
| <b>IRIGENIN, DIBENZYL ETHER</b>        |                                                                                       |          |
| 10.0E-9                                |  | 124.59   |
| 100.0E-9                               |  | 143.42   |
| 1.0E-6                                 |  | 117.80   |
| 10.0E-6                                |  | 87.05    |
| <b>IRIGENOL</b>                        |                                                                                       |          |
| 10.0E-9                                |  | 124.76   |
| 100.0E-9                               |  | 117.10   |
| 1.0E-6                                 |  | 119.03   |
| 10.0E-6                                |  | 65.27    |
| <b>IRIGINOL HEXAACEATATE</b>           |                                                                                       |          |
| 10.0E-9                                |  | 113.67   |
| 100.0E-9                               |  | 120.99   |
| 1.0E-6                                 |  | 106.80   |
| 10.0E-6                                |  | 93.82    |
| <b>ISAXONINE</b>                       |                                                                                       |          |
| 10.0E-9                                |  | 101.20   |
| 100.0E-9                               |  | 114.51   |
| 1.0E-6                                 |  | 91.54    |
| 10.0E-6                                |  | 1.40     |

| Compounds and Final Concentrations (M) | Average of % Viability | Hits (✓) |
|----------------------------------------|------------------------|----------|
| <b>ISOBERGAPTENE</b>                   |                        |          |
| 10.0E-9                                |                        | 119.76   |
| 100.0E-9                               |                        | 126.50   |
| 1.0E-6                                 |                        | 118.03   |
| 10.0E-6                                |                        | 123.63   |
| <b>ISOETHARINE MESYLATE</b>            |                        |          |
| 10.0E-9                                |                        | 116.60   |
| 100.0E-9                               |                        | 110.87   |
| 1.0E-6                                 |                        | 31.08    |
| 10.0E-6                                |                        | 1.89     |
| <b>ISOFLUPREDNONE ACETATE</b>          |                        |          |
| 10.0E-9                                |                        | 83.90    |
| 100.0E-9                               |                        | 87.05    |
| 1.0E-6                                 |                        | 89.83    |
| 10.0E-6                                |                        | 81.51    |
| <b>ISOGUVACINE HYDROCHLORIDE</b>       |                        |          |
| 10.0E-9                                |                        | 129.65   |
| 100.0E-9                               |                        | 130.99   |
| 1.0E-6                                 |                        | 116.63   |
| 10.0E-6                                |                        | 117.42   |
| <b>ISOKOBUSONE</b>                     |                        |          |
| 10.0E-9                                |                        | 119.37   |
| 100.0E-9                               |                        | 136.83   |
| 1.0E-6                                 |                        | 121.07   |
| 10.0E-6                                |                        | 92.98    |
| <b>ISOLIQUIRITIGENIN</b>               |                        |          |
| 10.0E-9                                |                        | 101.85   |
| 100.0E-9                               |                        | 115.18   |
| 1.0E-6                                 |                        | 112.90   |
| 10.0E-6                                |                        | 93.44    |
| <b>ISONIAZID</b>                       |                        |          |
| 10.0E-9                                |                        | 108.92   |
| 100.0E-9                               |                        | 96.06    |
| 1.0E-6                                 |                        | 106.68   |
| 10.0E-6                                |                        | 99.38    |
| <b>ISOPEONOL</b>                       |                        |          |
| 10.0E-9                                |                        | 118.38   |
| 100.0E-9                               |                        | 129.78   |
| 1.0E-6                                 |                        | 110.56   |
| 10.0E-6                                |                        | 105.18   |
| <b>ISOPIMPINELLIN</b>                  |                        |          |
| 10.0E-9                                |                        | 117.55   |
| 100.0E-9                               |                        | 130.09   |
| 1.0E-6                                 |                        | 118.07   |
| 10.0E-6                                |                        | 125.89   |
| <b>ISOPROPAMIDE IODIDE</b>             |                        |          |
| 10.0E-9                                |                        | 120.17   |
| 100.0E-9                               |                        | 116.50   |
| 1.0E-6                                 |                        | 112.94   |
| 10.0E-6                                |                        | 99.77    |
| <b>ISOPROTERENOL HYDROCHLORIDE</b>     |                        |          |
| 10.0E-9                                |                        | 122.76   |
| 100.0E-9                               |                        | 88.80    |
| 1.0E-6                                 |                        | 92.24    |
| 10.0E-6                                |                        | 103.11   |
| <b>ISOROTENONE</b>                     |                        |          |
| 10.0E-9                                |                        | 115.25   |
| 100.0E-9                               |                        | 114.53   |
| 1.0E-6                                 |                        | 121.69   |
| 10.0E-6                                |                        | 36.89    |
| <b>ISOSAFROLE</b>                      |                        |          |
| 10.0E-9                                |                        | 115.44   |
| 100.0E-9                               |                        | 108.92   |
| 1.0E-6                                 |                        | 97.42    |
| 10.0E-6                                |                        | 104.46   |
| <b>ISOSORBIDE DINITRATE</b>            |                        |          |
| 10.0E-9                                |                        | 37.92    |
| 100.0E-9                               |                        | 67.33    |
| 1.0E-6                                 |                        | 95.57    |
| 10.0E-6                                |                        | 97.59    |
| <b>ISOSORBIDE MONONITRATE</b>          |                        |          |
| 10.0E-9                                |                        | 121.54   |
| 100.0E-9                               |                        | 119.20   |
| 1.0E-6                                 |                        | 102.28   |
| 10.0E-6                                |                        | 100.35   |
| <b>ISOTECTORIGENIN, 7-METHYL ETHER</b> |                        |          |
| 10.0E-9                                |                        | 126.29   |
| 100.0E-9                               |                        | 133.21   |
| 1.0E-6                                 |                        | 112.75   |
| 10.0E-6                                |                        | 116.16   |

| Compounds and Final Concentrations (M) | Average of % Viability | Hits (✓) |
|----------------------------------------|------------------------|----------|
| <b>ISOTRETINON</b>                     |                        |          |
| 10.0E-9                                |                        | 93.96    |
| 100.0E-9                               |                        | 117.15   |
| 1.0E-6                                 |                        | 137.49   |
| 10.0E-6                                |                        | 115.30   |
| <b>ISOXICAM</b>                        |                        |          |
| 10.0E-9                                |                        | 76.26    |
| 100.0E-9                               |                        | 102.29   |
| 1.0E-6                                 |                        | 95.40    |
| 10.0E-6                                |                        | 82.10    |
| <b>ISOXSUPRINE HYDROCHLORIDE</b>       |                        |          |
| 10.0E-9                                |                        | 116.92   |
| 100.0E-9                               |                        | 73.20    |
| 1.0E-6                                 |                        | 102.07   |
| 10.0E-6                                |                        | 107.99   |
| <b>ITRACONAZOLE</b>                    |                        |          |
| 10.0E-9                                |                        | 112.53   |
| 100.0E-9                               |                        | 104.96   |
| 1.0E-6                                 |                        | 95.47    |
| 10.0E-6                                |                        | 66.64    |
| <b>IVERMECTIN</b>                      |                        |          |
| 10.0E-9                                |                        | 103.77   |
| 100.0E-9                               |                        | 92.84    |
| 1.0E-6                                 |                        | 84.65    |
| 10.0E-6                                |                        | -0.03    |
| <b>JUAREZIC ACID</b>                   |                        |          |
| 10.0E-9                                |                        | 116.36   |
| 100.0E-9                               |                        | 124.70   |
| 1.0E-6                                 |                        | 105.62   |
| 10.0E-6                                |                        | 102.99   |
| <b>JUGLONE</b>                         |                        |          |
| 10.0E-9                                |                        | 122.97   |
| 100.0E-9                               |                        | 128.32   |
| 1.0E-6                                 |                        | 100.42   |
| 10.0E-6                                |                        | 65.39    |
| <b>KAEMPFEROL</b>                      |                        |          |
| 10.0E-9                                |                        | 111.73   |
| 100.0E-9                               |                        | 105.87   |
| 1.0E-6                                 |                        | 114.60   |
| 10.0E-6                                |                        | 85.89    |
| <b>KAINIC ACID</b>                     |                        |          |
| 10.0E-9                                |                        | 119.39   |
| 100.0E-9                               |                        | 124.54   |
| 1.0E-6                                 |                        | 111.16   |
| 10.0E-6                                |                        | 122.75   |
| <b>KANAMYCIN A SULFATE</b>             |                        |          |
| 10.0E-9                                |                        | 78.68    |
| 100.0E-9                               |                        | 79.95    |
| 1.0E-6                                 |                        | 89.09    |
| 10.0E-6                                |                        | 88.28    |
| <b>KARANJIN</b>                        |                        |          |
| 10.0E-9                                |                        | 121.20   |
| 100.0E-9                               |                        | 121.10   |
| 1.0E-6                                 |                        | 124.55   |
| 10.0E-6                                |                        | 123.53   |
| <b>KASUGAMYCIN HYDROCHLORIDE</b>       |                        |          |
| 10.0E-9                                |                        | 95.45    |
| 100.0E-9                               |                        | 97.62    |
| 1.0E-6                                 |                        | 107.96   |
| 10.0E-6                                |                        | 101.01   |
| <b>KAWAIN</b>                          |                        |          |
| 10.0E-9                                |                        | 101.18   |
| 100.0E-9                               |                        | 115.26   |
| 1.0E-6                                 |                        | 114.42   |
| 10.0E-6                                |                        | 98.02    |
| <b>KETANSERIN TARTRATE</b>             |                        |          |
| 10.0E-9                                |                        | 111.87   |
| 100.0E-9                               |                        | 118.21   |
| 1.0E-6                                 |                        | 107.62   |
| 10.0E-6                                |                        | 118.34   |
| <b>KETOCONAZOLE</b>                    |                        |          |
| 10.0E-9                                |                        | 113.95   |
| 100.0E-9                               |                        | 98.49    |
| 1.0E-6                                 |                        | 92.62    |
| 10.0E-6                                |                        | 27.65    |
| <b>KETOPROFEN</b>                      |                        |          |
| 10.0E-9                                |                        | 99.92    |
| 100.0E-9                               |                        | 106.38   |
| 1.0E-6                                 |                        | 103.94   |
| 10.0E-6                                |                        | 96.19    |



| Compounds and Final Concentrations (M) | Average of % Viability | Hits (✓) |
|----------------------------------------|------------------------|----------|
| <b>KETOROLAC TROMETHAMINE</b>          |                        |          |
| 10.0E-9                                |                        | 112.43   |
| 100.0E-9                               |                        | 86.80    |
| 1.0E-6                                 |                        | 98.22    |
| 10.0E-6                                |                        | 91.44    |
| <b>KETOTIFEN FUMARATE</b>              |                        |          |
| 10.0E-9                                |                        | 132.08   |
| 100.0E-9                               |                        | 98.28    |
| 1.0E-6                                 |                        | 104.36   |
| 10.0E-6                                |                        | 103.89   |
| <b>KHAYANTHONE</b>                     |                        |          |
| 10.0E-9                                |                        | 108.74   |
| 100.0E-9                               |                        | 108.00   |
| 1.0E-6                                 |                        | 98.08    |
| 10.0E-6                                |                        | 81.61    |
| <b>KHIVORIN</b>                        |                        |          |
| 10.0E-9                                |                        | 115.55   |
| 100.0E-9                               |                        | 129.38   |
| 1.0E-6                                 |                        | 109.04   |
| 10.0E-6                                |                        | 66.80    |
| <b>KINETIN</b>                         |                        |          |
| 10.0E-9                                |                        | 101.44   |
| 100.0E-9                               |                        | 91.98    |
| 1.0E-6                                 |                        | 96.47    |
| 10.0E-6                                |                        | 80.02    |
| <b>KINETIN RIBOSIDE</b>                |                        |          |
| 10.0E-9                                |                        | 127.45   |
| 100.0E-9                               |                        | 138.15   |
| 1.0E-6                                 |                        | 17.76    |
| 10.0E-6                                |                        | 0.00     |
| <b>KOBUSONE</b>                        |                        |          |
| 10.0E-9                                |                        | 127.78   |
| 100.0E-9                               |                        | 131.35   |
| 1.0E-6                                 |                        | 121.40   |
| 10.0E-6                                |                        | 121.95   |
| <b>KOJIC ACID</b>                      |                        |          |
| 10.0E-9                                |                        | 103.23   |
| 100.0E-9                               |                        | 105.90   |
| 1.0E-6                                 |                        | 104.47   |
| 10.0E-6                                |                        | 108.66   |
| <b>KOPARIN</b>                         |                        |          |
| 10.0E-9                                |                        | 131.73   |
| 100.0E-9                               |                        | 126.37   |
| 1.0E-6                                 |                        | 111.21   |
| 10.0E-6                                |                        | 87.21    |
| <b>KUHLMANNIN</b>                      |                        |          |
| 10.0E-9                                |                        | 126.19   |
| 100.0E-9                               |                        | 121.32   |
| 1.0E-6                                 |                        | 119.18   |
| 10.0E-6                                |                        | 110.53   |
| <b>KYNURENINE</b>                      |                        |          |
| 10.0E-9                                |                        | 94.54    |
| 100.0E-9                               |                        | 100.42   |
| 1.0E-6                                 |                        | 89.71    |
| 10.0E-6                                |                        | 94.29    |
| <b>L(+/-)-ALLIIN</b>                   |                        |          |
| 10.0E-9                                |                        | 132.67   |
| 100.0E-9                               |                        | 116.02   |
| 1.0E-6                                 |                        | 116.98   |
| 10.0E-6                                |                        | 77.94    |
| <b>LABETALOL HYDROCHLORIDE</b>         |                        |          |
| 10.0E-9                                |                        | 94.52    |
| 100.0E-9                               |                        | 109.71   |
| 1.0E-6                                 |                        | 96.52    |
| 10.0E-6                                |                        | 71.62    |
| <b>LACCAIC ACID A</b>                  |                        |          |
| 10.0E-9                                |                        | 114.99   |
| 100.0E-9                               |                        | 111.55   |
| 1.0E-6                                 |                        | 114.95   |
| 10.0E-6                                |                        | 103.70   |
| <b>LACTOBIONIC ACID</b>                |                        |          |
| 10.0E-9                                |                        | 105.96   |
| 100.0E-9                               |                        | 113.95   |
| 1.0E-6                                 |                        | 111.78   |
| 10.0E-6                                |                        | 95.25    |
| <b>LACTULOSE</b>                       |                        |          |
| 10.0E-9                                |                        | 108.07   |
| 100.0E-9                               |                        | 95.85    |
| 1.0E-6                                 |                        | 91.38    |
| 10.0E-6                                |                        | 93.14    |

| Compounds and Final Concentrations (M) | Average of % Viability | Hits (✓) |
|----------------------------------------|------------------------|----------|
| <b>LAGOCHILIN</b>                      |                        |          |
| 10.0E-9                                |                        | 104.91   |
| 100.0E-9                               |                        | 111.79   |
| 1.0E-6                                 |                        | 104.85   |
| 10.0E-6                                |                        | 103.30   |
| <b>LAMOTRIGINE</b>                     |                        |          |
| 10.0E-9                                |                        | 122.55   |
| 100.0E-9                               |                        | 119.40   |
| 1.0E-6                                 |                        | 114.19   |
| 10.0E-6                                |                        | 113.38   |
| <b>LANATOSIDE C</b>                    |                        |          |
| 10.0E-9                                |                        | 117.95   |
| 100.0E-9                               |                        | 119.10   |
| 1.0E-6                                 |                        | 11.37    |
| 10.0E-6                                |                        | 1.95     |
| <b>LANSOPRAZOLE</b>                    |                        |          |
| 10.0E-9                                |                        | 122.97   |
| 100.0E-9                               |                        | 104.87   |
| 1.0E-6                                 |                        | 100.91   |
| 10.0E-6                                |                        | 95.12    |
| <b>LAPACHOL</b>                        |                        |          |
| 10.0E-9                                |                        | 120.62   |
| 100.0E-9                               |                        | 133.81   |
| 1.0E-6                                 |                        | 107.58   |
| 10.0E-6                                |                        | 103.60   |
| <b>LAPPACONITINE</b>                   |                        |          |
| 10.0E-9                                |                        | 137.75   |
| 100.0E-9                               |                        | 129.20   |
| 1.0E-6                                 |                        | 52.68    |
| 10.0E-6                                |                        | 1.97     |
| <b>LARIXINIC ACID</b>                  |                        |          |
| 10.0E-9                                |                        | 116.29   |
| 100.0E-9                               |                        | 137.11   |
| 1.0E-6                                 |                        | 117.60   |
| 10.0E-6                                |                        | 98.37    |
| <b>LARIXOL</b>                         |                        |          |
| 10.0E-9                                |                        | 115.23   |
| 100.0E-9                               |                        | 129.18   |
| 1.0E-6                                 |                        | 104.58   |
| 10.0E-6                                |                        | 86.05    |
| <b>LARIXOL ACETATE</b>                 |                        |          |
| 10.0E-9                                |                        | 123.85   |
| 100.0E-9                               |                        | 125.79   |
| 1.0E-6                                 |                        | 108.73   |
| 10.0E-6                                |                        | 60.08    |
| <b>LATHOSTEROL</b>                     |                        |          |
| 10.0E-9                                |                        | 118.46   |
| 100.0E-9                               |                        | 107.20   |
| 1.0E-6                                 |                        | 101.15   |
| 10.0E-6                                |                        | 102.86   |
| <b>L-BUTHIONINE SULFOXIMINE</b>        |                        |          |
| 10.0E-9                                |                        | 107.18   |
| 100.0E-9                               |                        | 98.48    |
| 1.0E-6                                 |                        | 110.15   |
| 10.0E-6                                |                        | 105.43   |
| <b>L-DEOXYALLIIN</b>                   |                        |          |
| 10.0E-9                                |                        | 119.65   |
| 100.0E-9                               |                        | 119.94   |
| 1.0E-6                                 |                        | 103.47   |
| 10.0E-6                                |                        | 108.76   |
| <b>LECANORIC ACID</b>                  |                        |          |
| 10.0E-9                                |                        | 121.73   |
| 100.0E-9                               |                        | 104.81   |
| 1.0E-6                                 |                        | 98.53    |
| 10.0E-6                                |                        | 93.07    |
| <b>LEODIN</b>                          |                        |          |
| 10.0E-9                                |                        | 136.31   |
| 100.0E-9                               |                        | 146.45   |
| 1.0E-6                                 |                        | 126.65   |
| 10.0E-6                                |                        | 119.33   |
| <b>LEUCODIN</b>                        |                        |          |
| 10.0E-9                                |                        | 104.81   |
| 100.0E-9                               |                        | 98.94    |
| 1.0E-6                                 |                        | 112.71   |
| 10.0E-6                                |                        | 108.56   |
| <b>LEUCOVORIN CALCIUM</b>              |                        |          |
| 10.0E-9                                |                        | 103.18   |
| 100.0E-9                               |                        | 109.87   |
| 1.0E-6                                 |                        | 84.12    |
| 10.0E-6                                |                        | 89.26    |

| Compounds and Final Concentrations (M)        | Average of % Viability | Hits (✓) |
|-----------------------------------------------|------------------------|----------|
| <b>LEVALBUTEROL HYDROCHLORIDE</b>             |                        |          |
| 10.0E-9                                       |                        | 94.30    |
| 100.0E-9                                      |                        | 97.81    |
| 1.0E-6                                        |                        | 89.55    |
| 10.0E-6                                       |                        | 94.41    |
| <b>LEVAMISOLE HYDROCHLORIDE</b>               |                        |          |
| 10.0E-9                                       |                        | 83.41    |
| 100.0E-9                                      |                        | 103.73   |
| 1.0E-6                                        |                        | 103.55   |
| 10.0E-6                                       |                        | 98.70    |
| <b>LEVOCARNITINE</b>                          |                        |          |
| 10.0E-9                                       |                        | 114.73   |
| 100.0E-9                                      |                        | 108.80   |
| 1.0E-6                                        |                        | 121.87   |
| 10.0E-6                                       |                        | 109.72   |
| <b>LEVOCARNITINE PROPIONATE HYDROCHLORIDE</b> |                        |          |
| 10.0E-9                                       |                        | 101.81   |
| 100.0E-9                                      |                        | 96.53    |
| 1.0E-6                                        |                        | 96.61    |
| 10.0E-6                                       |                        | 93.19    |
| <b>LEVODOPA</b>                               |                        |          |
| 10.0E-9                                       |                        | 73.73    |
| 100.0E-9                                      |                        | 78.75    |
| 1.0E-6                                        |                        | 79.32    |
| 10.0E-6                                       |                        | 1.51     |
| <b>LEVOFLOXACIN</b>                           |                        |          |
| 10.0E-9                                       |                        | 114.55   |
| 100.0E-9                                      |                        | 124.12   |
| 1.0E-6                                        |                        | 104.73   |
| 10.0E-6                                       |                        | 105.82   |
| <b>LEVONORDEFRIN</b>                          |                        |          |
| 10.0E-9                                       |                        | 105.41   |
| 100.0E-9                                      |                        | 91.00    |
| 1.0E-6                                        |                        | 91.88    |
| 10.0E-6                                       |                        | 88.13    |
| <b>LEVULINIC ACID, 3-BENZYLIDENYL-</b>        |                        |          |
| 10.0E-9                                       |                        | 97.02    |
| 100.0E-9                                      |                        | 94.69    |
| 1.0E-6                                        |                        | 99.49    |
| 10.0E-6                                       |                        | 74.44    |
| <b>LIDOCAINE HYDROCHLORIDE</b>                |                        |          |
| 10.0E-9                                       |                        | 130.08   |
| 100.0E-9                                      |                        | 98.89    |
| 1.0E-6                                        |                        | 107.26   |
| 10.0E-6                                       |                        | 112.96   |
| <b>LIGUSTILIDE</b>                            |                        |          |
| 10.0E-9                                       |                        | 135.20   |
| 100.0E-9                                      |                        | 112.93   |
| 1.0E-6                                        |                        | 113.79   |
| 10.0E-6                                       |                        | 107.05   |
| <b>LIMONIN</b>                                |                        |          |
| 10.0E-9                                       |                        | 102.01   |
| 100.0E-9                                      |                        | 117.69   |
| 1.0E-6                                        |                        | 120.52   |
| 10.0E-6                                       |                        | 130.58   |
| <b>LINALOOL (+)</b>                           |                        |          |
| 10.0E-9                                       |                        | 122.12   |
| 100.0E-9                                      |                        | 118.89   |
| 1.0E-6                                        |                        | 102.76   |
| 10.0E-6                                       |                        | 3.95     |
| <b>LINAMARIN</b>                              |                        |          |
| 10.0E-9                                       |                        | 99.79    |
| 100.0E-9                                      |                        | 93.95    |
| 1.0E-6                                        |                        | 104.85   |
| 10.0E-6                                       |                        | 47.73    |
| <b>LINCOMYCIN HYDROCHLORIDE</b>               |                        |          |
| 10.0E-9                                       |                        | 114.54   |
| 100.0E-9                                      |                        | 90.35    |
| 1.0E-6                                        |                        | 96.31    |
| 10.0E-6                                       |                        | 107.00   |
| <b>LINDANE</b>                                |                        |          |
| 10.0E-9                                       |                        | 81.45    |
| 100.0E-9                                      |                        | 101.25   |
| 1.0E-6                                        |                        | 91.02    |
| 10.0E-6                                       |                        | 81.26    |
| <b>LIOTHYRONINE</b>                           |                        |          |
| 10.0E-9                                       |                        | 125.56   |
| 100.0E-9                                      |                        | 105.66   |
| 1.0E-6                                        |                        | 104.21   |
| 10.0E-6                                       |                        | 123.96   |

| Compounds and Final Concentrations (M) | Average of % Viability | Hits (✓) |
|----------------------------------------|------------------------|----------|
| <b>LIOTHYRONINE (L- isomer) SODIUM</b> |                        |          |
| 10.0E-9                                |                        | 108.23   |
| 100.0E-9                               |                        | 112.96   |
| 1.0E-6                                 |                        | 107.76   |
| 10.0E-6                                |                        | 116.25   |
| <b>LIPOAMIDE</b>                       |                        |          |
| 10.0E-9                                |                        | 111.41   |
| 100.0E-9                               |                        | 111.76   |
| 1.0E-6                                 |                        | 112.68   |
| 10.0E-6                                |                        | 98.45    |
| <b>LISINAPRIL</b>                      |                        |          |
| 10.0E-9                                |                        | 102.05   |
| 100.0E-9                               |                        | 102.38   |
| 1.0E-6                                 |                        | 105.91   |
| 10.0E-6                                |                        | 104.78   |
| <b>LITHIUM CITRATE</b>                 |                        |          |
| 10.0E-9                                |                        | 119.19   |
| 100.0E-9                               |                        | 123.97   |
| 1.0E-6                                 |                        | 107.01   |
| 10.0E-6                                |                        | 119.80   |
| <b>LITHOCHOL-11-ENIC ACID</b>          |                        |          |
| 10.0E-9                                |                        | 88.25    |
| 100.0E-9                               |                        | 93.57    |
| 1.0E-6                                 |                        | 102.42   |
| 10.0E-6                                |                        | 86.24    |
| <b>LITHOCHOLIC ACID</b>                |                        |          |
| 10.0E-9                                |                        | 101.10   |
| 100.0E-9                               |                        | 123.66   |
| 1.0E-6                                 |                        | 120.23   |
| 10.0E-6                                |                        | 105.64   |
| <b>L-LEUCYL-L-ALANINE</b>              |                        |          |
| 10.0E-9                                |                        | 133.03   |
| 100.0E-9                               |                        | 130.67   |
| 1.0E-6                                 |                        | 134.27   |
| 10.0E-6                                |                        | 106.04   |
| <b>LOBARIC ACID</b>                    |                        |          |
| 10.0E-9                                |                        | 119.67   |
| 100.0E-9                               |                        | 116.41   |
| 1.0E-6                                 |                        | 126.31   |
| 10.0E-6                                |                        | 111.09   |
| <b>LOBELINE HYDROCHLORIDE</b>          |                        |          |
| 10.0E-9                                |                        | 127.14   |
| 100.0E-9                               |                        | 108.90   |
| 1.0E-6                                 |                        | 100.49   |
| 10.0E-6                                |                        | 35.26    |
| <b>LOBENDAZOLE</b>                     |                        |          |
| 10.0E-9                                |                        | 122.50   |
| 100.0E-9                               |                        | 120.32   |
| 1.0E-6                                 |                        | 108.53   |
| 10.0E-6                                |                        | 110.87   |
| <b>LOMEFLOXACIN HYDROCHLORIDE</b>      |                        |          |
| 10.0E-9                                |                        | 109.24   |
| 100.0E-9                               |                        | 108.88   |
| 1.0E-6                                 |                        | 113.93   |
| 10.0E-6                                |                        | 107.34   |
| <b>LOPERAMIDE HYDROCHLORIDE</b>        |                        |          |
| 10.0E-9                                |                        | 108.85   |
| 100.0E-9                               |                        | 114.37   |
| 1.0E-6                                 |                        | 100.84   |
| 10.0E-6                                |                        | 75.64    |
| <b>LORATADINE</b>                      |                        |          |
| 10.0E-9                                |                        | 115.04   |
| 100.0E-9                               |                        | 119.02   |
| 1.0E-6                                 |                        | 106.99   |
| 10.0E-6                                |                        | 104.81   |
| <b>LOSARTAN</b>                        |                        |          |
| 10.0E-9                                |                        | 110.80   |
| 100.0E-9                               |                        | 122.36   |
| 1.0E-6                                 |                        | 124.37   |
| 10.0E-6                                |                        | 109.46   |
| <b>LOVASTATIN</b>                      |                        |          |
| 10.0E-9                                |                        | 123.13   |
| 100.0E-9                               |                        | 111.91   |
| 1.0E-6                                 |                        | 120.31   |
| 10.0E-6                                |                        | 83.19    |
| <b>LOXAPINE SUCCINATE</b>              |                        |          |
| 10.0E-9                                |                        | 117.79   |
| 100.0E-9                               |                        | 120.03   |
| 1.0E-6                                 |                        | 110.94   |
| 10.0E-6                                |                        | 126.37   |

| Compounds and Final Concentrations (M)                      | Average of % Viability | Hits (✓) |
|-------------------------------------------------------------|------------------------|----------|
| <b>L-PHENYLALANINOL</b>                                     |                        |          |
| 10.0E-9                                                     |                        | 131.78   |
| 100.0E-9                                                    |                        | 128.41   |
| 1.0E-6                                                      |                        | 139.96   |
| 10.0E-6                                                     |                        | 130.16   |
| <b>LUFENURON</b>                                            |                        |          |
| 10.0E-9                                                     |                        | 123.23   |
| 100.0E-9                                                    |                        | 121.96   |
| 1.0E-6                                                      |                        | 104.73   |
| 10.0E-6                                                     |                        | 71.36    |
| <b>LUNARINE</b>                                             |                        |          |
| 10.0E-9                                                     |                        | 109.01   |
| 100.0E-9                                                    |                        | 133.66   |
| 1.0E-6                                                      |                        | 119.69   |
| 10.0E-6                                                     |                        | 107.51   |
| <b>LUPANINE PERCHLORATE</b>                                 |                        |          |
| 10.0E-9                                                     |                        | 124.87   |
| 100.0E-9                                                    |                        | 128.51   |
| 1.0E-6                                                      |                        | 105.25   |
| 10.0E-6                                                     |                        | 118.26   |
| <b>LUPANYL ACID HYDROCHLORIDE</b>                           |                        |          |
| 10.0E-9                                                     |                        | 138.61   |
| 100.0E-9                                                    |                        | 140.92   |
| 1.0E-6                                                      |                        | 122.61   |
| 10.0E-6                                                     |                        | 119.34   |
| <b>LUPEOL</b>                                               |                        |          |
| 10.0E-9                                                     |                        | 103.98   |
| 100.0E-9                                                    |                        | 128.55   |
| 1.0E-6                                                      |                        | 96.16    |
| 10.0E-6                                                     |                        | 109.66   |
| <b>LUPININE</b>                                             |                        |          |
| 10.0E-9                                                     |                        | 122.85   |
| 100.0E-9                                                    |                        | 133.00   |
| 1.0E-6                                                      |                        | 113.15   |
| 10.0E-6                                                     |                        | 119.19   |
| <b>MADECASSIC ACID</b>                                      |                        |          |
| 10.0E-9                                                     |                        | 129.76   |
| 100.0E-9                                                    |                        | 138.91   |
| 1.0E-6                                                      |                        | 137.98   |
| 10.0E-6                                                     |                        | 117.02   |
| <b>MAFENIDE HYDROCHLORIDE</b>                               |                        |          |
| 10.0E-9                                                     |                        | 76.30    |
| 100.0E-9                                                    |                        | 75.46    |
| 1.0E-6                                                      |                        | 81.23    |
| 10.0E-6                                                     |                        | 78.42    |
| <b>MALATHION</b>                                            |                        |          |
| 10.0E-9                                                     |                        | 113.38   |
| 100.0E-9                                                    |                        | 117.69   |
| 1.0E-6                                                      |                        | 105.84   |
| 10.0E-6                                                     |                        | 81.12    |
| <b>MANDELIC ACID, METHYL ESTER</b>                          |                        |          |
| 10.0E-9                                                     |                        | 116.04   |
| 100.0E-9                                                    |                        | 119.54   |
| 1.0E-6                                                      |                        | 114.30   |
| 10.0E-6                                                     |                        | 124.40   |
| <b>MANGANESE TETRAKIS(4-CARBOXYPHENYL)PORPHYRIN CHLORDE</b> |                        |          |
| 10.0E-9                                                     |                        | 123.83   |
| 100.0E-9                                                    |                        | 116.26   |
| 1.0E-6                                                      |                        | 127.93   |
| 10.0E-6                                                     |                        | 116.58   |
| <b>MANGIFERIN</b>                                           |                        |          |
| 10.0E-9                                                     |                        | 128.65   |
| 100.0E-9                                                    |                        | 113.08   |
| 1.0E-6                                                      |                        | 110.05   |
| 10.0E-6                                                     |                        | 111.17   |
| <b>MANGOSTIN TRIMETHYL ETHER</b>                            |                        |          |
| 10.0E-9                                                     |                        | 122.43   |
| 100.0E-9                                                    |                        | 121.80   |
| 1.0E-6                                                      |                        | 114.19   |
| 10.0E-6                                                     |                        | 101.83   |
| <b>MANNITOL</b>                                             |                        |          |
| 10.0E-9                                                     |                        | 122.85   |
| 100.0E-9                                                    |                        | 112.74   |
| 1.0E-6                                                      |                        | 121.05   |
| 10.0E-6                                                     |                        | 108.59   |
| <b>MAPROTILINE HYDROCHLORIDE</b>                            |                        |          |
| 10.0E-9                                                     |                        | 80.51    |
| 100.0E-9                                                    |                        | 87.09    |
| 1.0E-6                                                      |                        | 98.17    |
| 10.0E-6                                                     |                        | 77.56    |

| Compounds and Final Concentrations (M)  | Average of % Viability | Hits (✓) |   |
|-----------------------------------------|------------------------|----------|---|
| <b>MEBENDAZOLE</b>                      |                        |          |   |
| 10.0E-9                                 |                        | 99.58    |   |
| 100.0E-9                                |                        | 96.56    |   |
| 1.0E-6                                  |                        | 4.90     | ✓ |
| 10.0E-6                                 |                        | 0.92     |   |
| <b>MEBEVERINE HYDROCHLORIDE</b>         |                        |          |   |
| 10.0E-9                                 |                        | 82.48    |   |
| 100.0E-9                                |                        | 44.34    |   |
| 1.0E-6                                  |                        | 86.12    |   |
| 10.0E-6                                 |                        | 75.64    |   |
| <b>MEBHYDROLIN NAPHTHALENESULFONATE</b> |                        |          |   |
| 10.0E-9                                 |                        | 116.44   |   |
| 100.0E-9                                |                        | 121.05   |   |
| 1.0E-6                                  |                        | 111.16   |   |
| 10.0E-6                                 |                        | 113.18   |   |
| <b>MECHLORETHAMINE</b>                  |                        |          |   |
| 10.0E-9                                 |                        | 89.13    |   |
| 100.0E-9                                |                        | 85.00    |   |
| 1.0E-6                                  |                        | 45.67    | ✓ |
| 10.0E-6                                 |                        | 2.64     |   |
| <b>MECLIZINE HYDROCHLORIDE</b>          |                        |          |   |
| 10.0E-9                                 |                        | 91.70    |   |
| 100.0E-9                                |                        | 95.68    |   |
| 1.0E-6                                  |                        | 77.86    | ✓ |
| 10.0E-6                                 |                        | 13.72    |   |
| <b>MECLOCYCLINE SULFOSALICYLATE</b>     |                        |          |   |
| 10.0E-9                                 |                        | 118.89   |   |
| 100.0E-9                                |                        | 120.06   |   |
| 1.0E-6                                  |                        | 95.50    |   |
| 10.0E-6                                 |                        | 30.51    |   |
| <b>MECLOFENAMATE SODIUM</b>             |                        |          |   |
| 10.0E-9                                 |                        | 87.40    |   |
| 100.0E-9                                |                        | 96.05    |   |
| 1.0E-6                                  |                        | 94.99    |   |
| 10.0E-6                                 |                        | 101.80   |   |
| <b>MECYSTEINE HYDROCHLORIDE</b>         |                        |          |   |
| 10.0E-9                                 |                        | 123.00   |   |
| 100.0E-9                                |                        | 119.66   |   |
| 1.0E-6                                  |                        | 124.88   |   |
| 10.0E-6                                 |                        | 98.20    |   |
| <b>MEDROXYPROGESTERONE ACETATE</b>      |                        |          |   |
| 10.0E-9                                 |                        | 111.38   |   |
| 100.0E-9                                |                        | 50.46    |   |
| 1.0E-6                                  |                        | 1.03     | ✓ |
| 10.0E-6                                 |                        | 1.63     |   |
| <b>MEDRYSONE</b>                        |                        |          |   |
| 10.0E-9                                 |                        | 74.51    |   |
| 100.0E-9                                |                        | 89.59    |   |
| 1.0E-6                                  |                        | 104.45   |   |
| 10.0E-6                                 |                        | 94.45    |   |
| <b>MEFENAMIC ACID</b>                   |                        |          |   |
| 10.0E-9                                 |                        | 104.35   |   |
| 100.0E-9                                |                        | 111.22   |   |
| 1.0E-6                                  |                        | 100.40   |   |
| 10.0E-6                                 |                        | 95.09    |   |
| <b>MEFEXAMIDE</b>                       |                        |          |   |
| 10.0E-9                                 |                        | 90.41    |   |
| 100.0E-9                                |                        | 106.91   |   |
| 1.0E-6                                  |                        | 95.74    |   |
| 10.0E-6                                 |                        | 99.75    |   |
| <b>MEFLOQUINE</b>                       |                        |          |   |
| 10.0E-9                                 |                        | 125.78   |   |
| 100.0E-9                                |                        | 115.34   |   |
| 1.0E-6                                  |                        | 110.87   |   |
| 10.0E-6                                 |                        | 103.72   |   |
| <b>MEGESTROL ACETATE</b>                |                        |          |   |
| 10.0E-9                                 |                        | 90.03    |   |
| 100.0E-9                                |                        | 92.41    |   |
| 1.0E-6                                  |                        | 100.00   |   |
| 10.0E-6                                 |                        | 88.22    |   |
| <b>MEGLUMINE</b>                        |                        |          |   |
| 10.0E-9                                 |                        | 86.43    |   |
| 100.0E-9                                |                        | 73.87    |   |
| 1.0E-6                                  |                        | 72.99    |   |
| 10.0E-6                                 |                        | 2.34     |   |
| <b>MELATONIN</b>                        |                        |          |   |
| 10.0E-9                                 |                        | 116.51   |   |
| 100.0E-9                                |                        | 119.11   |   |
| 1.0E-6                                  |                        | 106.31   |   |
| 10.0E-6                                 |                        | 109.60   |   |

| Compounds and Final Concentrations (M) | Average of % Viability | Hits (✓) |
|----------------------------------------|------------------------|----------|
| <b>MELENGESTROL ACETATE</b>            |                        |          |
| 10.0E-9                                |                        | 82.98    |
| 100.0E-9                               |                        | 90.39    |
| 1.0E-6                                 |                        | 89.47    |
| 10.0E-6                                |                        | 54.04    |
| <b>MELEZITOSE</b>                      |                        |          |
| 10.0E-9                                |                        | 117.84   |
| 100.0E-9                               |                        | 116.02   |
| 1.0E-6                                 |                        | 103.39   |
| 10.0E-6                                |                        | 117.01   |
| <b>MELIBIOSE</b>                       |                        |          |
| 10.0E-9                                |                        | 96.60    |
| 100.0E-9                               |                        | 96.64    |
| 1.0E-6                                 |                        | 100.54   |
| 10.0E-6                                |                        | 84.86    |
| <b>MELOXICAM SODIUM</b>                |                        |          |
| 10.0E-9                                |                        | 117.66   |
| 100.0E-9                               |                        | 112.50   |
| 1.0E-6                                 |                        | 107.98   |
| 10.0E-6                                |                        | 110.99   |
| <b>MELPHALAN</b>                       |                        |          |
| 10.0E-9                                |                        | 99.12    |
| 100.0E-9                               |                        | 75.40    |
| 1.0E-6                                 |                        | 4.17     |
| 10.0E-6                                |                        | 3.28     |
| <b>MEMANTINE HYDROCHLORIDE</b>         |                        |          |
| 10.0E-9                                |                        | 95.88    |
| 100.0E-9                               |                        | 89.30    |
| 1.0E-6                                 |                        | 91.57    |
| 10.0E-6                                |                        | 79.47    |
| <b>MENADIONE</b>                       |                        |          |
| 10.0E-9                                |                        | 121.49   |
| 100.0E-9                               |                        | 108.22   |
| 1.0E-6                                 |                        | 97.24    |
| 10.0E-6                                |                        | 93.43    |
| <b>MENAQUINONE-4</b>                   |                        |          |
| 10.0E-9                                |                        | 127.63   |
| 100.0E-9                               |                        | 145.61   |
| 1.0E-6                                 |                        | 117.32   |
| 10.0E-6                                |                        | 83.83    |
| <b>MENTHOL(-)</b>                      |                        |          |
| 10.0E-9                                |                        | 119.94   |
| 100.0E-9                               |                        | 113.45   |
| 1.0E-6                                 |                        | 102.42   |
| 10.0E-6                                |                        | 95.75    |
| <b>MENTHONE</b>                        |                        |          |
| 10.0E-9                                |                        | 93.26    |
| 100.0E-9                               |                        | 86.54    |
| 1.0E-6                                 |                        | 92.52    |
| 10.0E-6                                |                        | 85.15    |
| <b>MENTHYL BENZOATE</b>                |                        |          |
| 10.0E-9                                |                        | 116.55   |
| 100.0E-9                               |                        | 118.10   |
| 1.0E-6                                 |                        | 122.05   |
| 10.0E-6                                |                        | 108.94   |
| <b>MEPENZOATE BROMIDE</b>              |                        |          |
| 10.0E-9                                |                        | 110.04   |
| 100.0E-9                               |                        | 88.71    |
| 1.0E-6                                 |                        | 89.58    |
| 10.0E-6                                |                        | 103.45   |
| <b>MEPHENTERMINE SULFATE</b>           |                        |          |
| 10.0E-9                                |                        | 90.92    |
| 100.0E-9                               |                        | 102.81   |
| 1.0E-6                                 |                        | 98.74    |
| 10.0E-6                                |                        | 109.38   |
| <b>MEPIROXOL</b>                       |                        |          |
| 10.0E-9                                |                        | 101.47   |
| 100.0E-9                               |                        | 97.95    |
| 1.0E-6                                 |                        | 98.98    |
| 10.0E-6                                |                        | 98.73    |
| <b>MEPIVACAINE HYDROCHLORIDE</b>       |                        |          |
| 10.0E-9                                |                        | 111.47   |
| 100.0E-9                               |                        | 114.88   |
| 1.0E-6                                 |                        | 107.04   |
| 10.0E-6                                |                        | 103.09   |
| <b>MERCAPTOPYRINE</b>                  |                        |          |
| 10.0E-9                                |                        | 110.59   |
| 100.0E-9                               |                        | 77.88    |
| 1.0E-6                                 |                        | 95.09    |
| 10.0E-6                                |                        | 85.32    |

| Compounds and Final Concentrations (M) | Average of % Viability | Hits (✓) |
|----------------------------------------|------------------------|----------|
| <b>MEROGEDUNIN</b>                     |                        |          |
| 10.0E-9                                |                        | 146.30   |
| 100.0E-9                               |                        | 129.89   |
| 1.0E-6                                 |                        | 126.87   |
| 10.0E-6                                |                        | 116.90   |
| <b>MESALAMINE</b>                      |                        |          |
| 10.0E-9                                |                        | 116.88   |
| 100.0E-9                               |                        | 123.64   |
| 1.0E-6                                 |                        | 109.52   |
| 10.0E-6                                |                        | 114.55   |
| <b>MESNA</b>                           |                        |          |
| 10.0E-9                                |                        | 87.39    |
| 100.0E-9                               |                        | 89.72    |
| 1.0E-6                                 |                        | 90.75    |
| 10.0E-6                                |                        | 97.88    |
| <b>MESTRANOL</b>                       |                        |          |
| 10.0E-9                                |                        | 94.30    |
| 100.0E-9                               |                        | 84.81    |
| 1.0E-6                                 |                        | 93.37    |
| 10.0E-6                                |                        | 97.44    |
| <b>METACETAMOL</b>                     |                        |          |
| 10.0E-9                                |                        | 129.29   |
| 100.0E-9                               |                        | 128.87   |
| 1.0E-6                                 |                        | 115.63   |
| 10.0E-6                                |                        | 127.81   |
| <b>METAMECONINE</b>                    |                        |          |
| 10.0E-9                                |                        | 117.39   |
| 100.0E-9                               |                        | 114.61   |
| 1.0E-6                                 |                        | 112.48   |
| 10.0E-6                                |                        | 116.27   |
| <b>METAMPICILLIN SODIUM</b>            |                        |          |
| 10.0E-9                                |                        | 110.80   |
| 100.0E-9                               |                        | 98.03    |
| 1.0E-6                                 |                        | 99.67    |
| 10.0E-6                                |                        | 72.13    |
| <b>METAPROTERENOL</b>                  |                        |          |
| 10.0E-9                                |                        | 99.35    |
| 100.0E-9                               |                        | 95.68    |
| 1.0E-6                                 |                        | 102.31   |
| 10.0E-6                                |                        | 86.26    |
| <b>METARAMINOL BITARTRATE</b>          |                        |          |
| 10.0E-9                                |                        | 84.92    |
| 100.0E-9                               |                        | 106.61   |
| 1.0E-6                                 |                        | 104.89   |
| 10.0E-6                                |                        | 107.73   |
| <b>METAXALONE</b>                      |                        |          |
| 10.0E-9                                |                        | 103.84   |
| 100.0E-9                               |                        | 110.77   |
| 1.0E-6                                 |                        | 120.23   |
| 10.0E-6                                |                        | 110.29   |
| <b>METERGOLINE</b>                     |                        |          |
| 10.0E-9                                |                        | 113.05   |
| 100.0E-9                               |                        | 104.66   |
| 1.0E-6                                 |                        | 116.58   |
| 10.0E-6                                |                        | 97.57    |
| <b>METFORMIN HYDROCHLORIDE</b>         |                        |          |
| 10.0E-9                                |                        | 105.27   |
| 100.0E-9                               |                        | 98.03    |
| 1.0E-6                                 |                        | 92.30    |
| 10.0E-6                                |                        | 80.85    |
| <b>METHACHOLINE CHLORIDE</b>           |                        |          |
| 10.0E-9                                |                        | 112.16   |
| 100.0E-9                               |                        | 113.57   |
| 1.0E-6                                 |                        | 131.06   |
| 10.0E-6                                |                        | 107.37   |
| <b>METHACYCLINE HYDROCHLORIDE</b>      |                        |          |
| 10.0E-9                                |                        | 103.33   |
| 100.0E-9                               |                        | 104.69   |
| 1.0E-6                                 |                        | 97.47    |
| 10.0E-6                                |                        | 80.72    |
| <b>METHAPYRILENE HYDROCHLORIDE</b>     |                        |          |
| 10.0E-9                                |                        | 98.68    |
| 100.0E-9                               |                        | 95.12    |
| 1.0E-6                                 |                        | 98.09    |
| 10.0E-6                                |                        | 95.54    |
| <b>METHAZOLAMIDE</b>                   |                        |          |
| 10.0E-9                                |                        | 84.36    |
| 100.0E-9                               |                        | 102.13   |
| 1.0E-6                                 |                        | 108.25   |
| 10.0E-6                                |                        | 119.01   |



| Compounds and Final Concentrations (M)             | Average of % Viability | Hits (✓) |
|----------------------------------------------------|------------------------|----------|
| <b>METHENAMINE</b>                                 |                        |          |
| 10.0E-9                                            |                        | 92.56    |
| 100.0E-9                                           |                        | 66.47    |
| 1.0E-6                                             |                        | 97.69    |
| 10.0E-6                                            |                        | 95.49    |
| <b>METHICILLIN SODIUM</b>                          |                        |          |
| 10.0E-9                                            |                        | 89.45    |
| 100.0E-9                                           |                        | 92.97    |
| 1.0E-6                                             |                        | 82.74    |
| 10.0E-6                                            |                        | 88.98    |
| <b>METHIMAZOLE</b>                                 |                        |          |
| 10.0E-9                                            |                        | 95.75    |
| 100.0E-9                                           |                        | 97.84    |
| 1.0E-6                                             |                        | 105.93   |
| 10.0E-6                                            |                        | 94.95    |
| <b>METHIONINE SULFOXIMINE (L)</b>                  |                        |          |
| 10.0E-9                                            |                        | 99.79    |
| 100.0E-9                                           |                        | 95.55    |
| 1.0E-6                                             |                        | 99.62    |
| 10.0E-6                                            |                        | 98.11    |
| <b>METHOCARBAMOL</b>                               |                        |          |
| 10.0E-9                                            |                        | 100.04   |
| 100.0E-9                                           |                        | 111.86   |
| 1.0E-6                                             |                        | 129.63   |
| 10.0E-6                                            |                        | 86.60    |
| <b>METHOPRENE (S)</b>                              |                        |          |
| 10.0E-9                                            |                        | 116.44   |
| 100.0E-9                                           |                        | 112.45   |
| 1.0E-6                                             |                        | 110.22   |
| 10.0E-6                                            |                        | 107.99   |
| <b>METHOTREXATE(+/-)</b>                           |                        |          |
| 10.0E-9                                            |                        | 103.33   |
| 100.0E-9                                           |                        | 75.85    |
| 1.0E-6                                             |                        | 38.86    |
| 10.0E-6                                            |                        | 50.15    |
| <b>METHOXAMINE HYDROCHLORIDE</b>                   |                        |          |
| 10.0E-9                                            |                        | 103.22   |
| 100.0E-9                                           |                        | 107.88   |
| 1.0E-6                                             |                        | 111.04   |
| 10.0E-6                                            |                        | 112.78   |
| <b>METHOXSALEN</b>                                 |                        |          |
| 10.0E-9                                            |                        | 103.39   |
| 100.0E-9                                           |                        | 101.40   |
| 1.0E-6                                             |                        | 85.24    |
| 10.0E-6                                            |                        | 80.67    |
| <b>METHOXYAMINE HYDROCHLORIDE</b>                  |                        |          |
| 10.0E-9                                            |                        | 89.30    |
| 100.0E-9                                           |                        | 93.07    |
| 1.0E-6                                             |                        | 97.86    |
| 10.0E-6                                            |                        | 88.87    |
| <b>METHOXYVONE</b>                                 |                        |          |
| 10.0E-9                                            |                        | 117.85   |
| 100.0E-9                                           |                        | 113.02   |
| 1.0E-6                                             |                        | 131.71   |
| 10.0E-6                                            |                        | 111.51   |
| <b>METHSCOPOLAMINE BROMIDE</b>                     |                        |          |
| 10.0E-9                                            |                        | 105.92   |
| 100.0E-9                                           |                        | 101.59   |
| 1.0E-6                                             |                        | 104.59   |
| 10.0E-6                                            |                        | 109.22   |
| <b>METHYL 7-DESHYDROXYPYRGOALLIN-4-CARBOXYLATE</b> |                        |          |
| 10.0E-9                                            |                        | 116.10   |
| 100.0E-9                                           |                        | 104.15   |
| 1.0E-6                                             |                        | 99.25    |
| 10.0E-6                                            |                        | 101.41   |
| <b>METHYL DEOXYCHOLATE</b>                         |                        |          |
| 10.0E-9                                            |                        | 115.36   |
| 100.0E-9                                           |                        | 130.33   |
| 1.0E-6                                             |                        | 97.47    |
| 10.0E-6                                            |                        | 91.63    |
| <b>METHYL ORSELLINATE</b>                          |                        |          |
| 10.0E-9                                            |                        | 109.71   |
| 100.0E-9                                           |                        | 120.88   |
| 1.0E-6                                             |                        | 111.26   |
| 10.0E-6                                            |                        | 117.80   |
| <b>METHYL ROBUSTONE</b>                            |                        |          |
| 10.0E-9                                            |                        | 125.14   |
| 100.0E-9                                           |                        | 135.48   |
| 1.0E-6                                             |                        | 110.01   |
| 10.0E-6                                            |                        | 116.05   |

| Compounds and Final Concentrations (M)     | Average of % Viability | Hits (✓) |
|--------------------------------------------|------------------------|----------|
| <b>METHYLATROPINE NITRATE</b>              |                        |          |
| 10.0E-9                                    |                        | 111.35   |
| 100.0E-9                                   |                        | 119.60   |
| 1.0E-6                                     |                        | 114.70   |
| 10.0E-6                                    |                        | 121.29   |
| <b>METHYLBENZETHONIUM CHLORIDE</b>         |                        |          |
| 10.0E-9                                    |                        | 97.43    |
| 100.0E-9                                   |                        | 99.36    |
| 1.0E-6                                     |                        | 70.36    |
| 10.0E-6                                    |                        | 2.73     |
| <b>METHYLDOPA</b>                          |                        |          |
| 10.0E-9                                    |                        | 112.46   |
| 100.0E-9                                   |                        | 107.17   |
| 1.0E-6                                     |                        | 119.15   |
| 10.0E-6                                    |                        | 107.03   |
| <b>METHYLENE BLUE</b>                      |                        |          |
| 10.0E-9                                    |                        | 115.84   |
| 100.0E-9                                   |                        | 99.76    |
| 1.0E-6                                     |                        | 66.79    |
| 10.0E-6                                    |                        | 1.16     |
| <b>METHYLERGONOVINE MALEATE</b>            |                        |          |
| 10.0E-9                                    |                        | 81.94    |
| 100.0E-9                                   |                        | 90.46    |
| 1.0E-6                                     |                        | 90.74    |
| 10.0E-6                                    |                        | 77.43    |
| <b>METHYLPHENIDATE HYDROCHLORIDE</b>       |                        |          |
| 10.0E-9                                    |                        | 97.05    |
| 100.0E-9                                   |                        | 100.62   |
| 1.0E-6                                     |                        | 93.22    |
| 10.0E-6                                    |                        | 97.12    |
| <b>METHYLPREDNISOLONE</b>                  |                        |          |
| 10.0E-9                                    |                        | 95.76    |
| 100.0E-9                                   |                        | 108.22   |
| 1.0E-6                                     |                        | 116.28   |
| 10.0E-6                                    |                        | 79.73    |
| <b>METHYLPREDNISOLONE SODIUM SUCCINATE</b> |                        |          |
| 10.0E-9                                    |                        | 82.97    |
| 100.0E-9                                   |                        | 104.81   |
| 1.0E-6                                     |                        | 104.31   |
| 10.0E-6                                    |                        | 107.70   |
| <b>METHYLTHIOURACIL</b>                    |                        |          |
| 10.0E-9                                    |                        | 93.55    |
| 100.0E-9                                   |                        | 93.54    |
| 1.0E-6                                     |                        | 84.08    |
| 10.0E-6                                    |                        | 96.61    |
| <b>METHYLXANTHOXYLIN</b>                   |                        |          |
| 10.0E-9                                    |                        | 117.60   |
| 100.0E-9                                   |                        | 155.16   |
| 1.0E-6                                     |                        | 116.25   |
| 10.0E-6                                    |                        | 137.14   |
| <b>METHYSERGIDE MALEATE</b>                |                        |          |
| 10.0E-9                                    |                        | 120.75   |
| 100.0E-9                                   |                        | 115.31   |
| 1.0E-6                                     |                        | 111.14   |
| 10.0E-6                                    |                        | 112.36   |
| <b>METICRANE</b>                           |                        |          |
| 10.0E-9                                    |                        | 110.73   |
| 100.0E-9                                   |                        | 118.82   |
| 1.0E-6                                     |                        | 115.37   |
| 10.0E-6                                    |                        | 124.17   |
| <b>METITEPINE MALEATE</b>                  |                        |          |
| 10.0E-9                                    |                        | 136.83   |
| 100.0E-9                                   |                        | 117.43   |
| 1.0E-6                                     |                        | 112.49   |
| 10.0E-6                                    |                        | 97.10    |
| <b>METOCLOPRAMIDE HYDROCHLORIDE</b>        |                        |          |
| 10.0E-9                                    |                        | 102.90   |
| 100.0E-9                                   |                        | 107.39   |
| 1.0E-6                                     |                        | 114.94   |
| 10.0E-6                                    |                        | 108.73   |
| <b>METOLAZONE</b>                          |                        |          |
| 10.0E-9                                    |                        | 129.06   |
| 100.0E-9                                   |                        | 117.17   |
| 1.0E-6                                     |                        | 99.26    |
| 10.0E-6                                    |                        | 105.68   |
| <b>METOPROLOL TARTRATE</b>                 |                        |          |
| 10.0E-9                                    |                        | 97.81    |
| 100.0E-9                                   |                        | 107.63   |
| 1.0E-6                                     |                        | 100.23   |
| 10.0E-6                                    |                        | 109.81   |

| Compounds and Final Concentrations (M) | Average of % Viability | Hits (✓) |
|----------------------------------------|------------------------|----------|
| <b>METRONIDAZOLE</b>                   |                        |          |
| 10.0E-9                                |                        | 90.09    |
| 100.0E-9                               |                        | 106.05   |
| 1.0E-6                                 |                        | 93.44    |
| 10.0E-6                                |                        | 86.96    |
| <b>MEVALONIC ACID LACTONE</b>          |                        |          |
| 10.0E-9                                |                        | 109.59   |
| 100.0E-9                               |                        | 112.73   |
| 1.0E-6                                 |                        | 117.04   |
| 10.0E-6                                |                        | 125.60   |
| <b>MEVASTATIN</b>                      |                        |          |
| 10.0E-9                                |                        | 125.08   |
| 100.0E-9                               |                        | 128.20   |
| 1.0E-6                                 |                        | 108.86   |
| 10.0E-6                                |                        | 88.81    |
| <b>MEXAMINE</b>                        |                        |          |
| 10.0E-9                                |                        | 115.43   |
| 100.0E-9                               |                        | 113.70   |
| 1.0E-6                                 |                        | 119.65   |
| 10.0E-6                                |                        | 116.10   |
| <b>MEXICANOLIDE</b>                    |                        |          |
| 10.0E-9                                |                        | 115.85   |
| 100.0E-9                               |                        | 118.71   |
| 1.0E-6                                 |                        | 111.04   |
| 10.0E-6                                |                        | 112.47   |
| <b>MEXILETINE HYDROCHLORIDE</b>        |                        |          |
| 10.0E-9                                |                        | 119.17   |
| 100.0E-9                               |                        | 106.96   |
| 1.0E-6                                 |                        | 26.76    |
| 10.0E-6                                |                        | 1.61     |
| <b>MICONAZOLE NITRATE</b>              |                        |          |
| 10.0E-9                                |                        | 88.31    |
| 100.0E-9                               |                        | 91.42    |
| 1.0E-6                                 |                        | 82.91    |
| 10.0E-6                                |                        | 12.38    |
| <b>MIDODRINE HYDROCHLORIDE</b>         |                        |          |
| 10.0E-9                                |                        | 115.49   |
| 100.0E-9                               |                        | 117.46   |
| 1.0E-6                                 |                        | 109.17   |
| 10.0E-6                                |                        | 105.51   |
| <b>MIGLITOL</b>                        |                        |          |
| 10.0E-9                                |                        | 127.64   |
| 100.0E-9                               |                        | 116.51   |
| 1.0E-6                                 |                        | 123.42   |
| 10.0E-6                                |                        | 112.84   |
| <b>MIMOSINE</b>                        |                        |          |
| 10.0E-9                                |                        | 112.09   |
| 100.0E-9                               |                        | 119.35   |
| 1.0E-6                                 |                        | 124.16   |
| 10.0E-6                                |                        | 109.80   |
| <b>MINAPRINE HYDROCHLORIDE</b>         |                        |          |
| 10.0E-9                                |                        | 103.67   |
| 100.0E-9                               |                        | 107.95   |
| 1.0E-6                                 |                        | 87.75    |
| 10.0E-6                                |                        | 92.54    |
| <b>MINOCYCLINE HYDROCHLORIDE</b>       |                        |          |
| 10.0E-9                                |                        | 106.77   |
| 100.0E-9                               |                        | 111.91   |
| 1.0E-6                                 |                        | 102.78   |
| 10.0E-6                                |                        | 53.28    |
| <b>MINOXIDIL</b>                       |                        |          |
| 10.0E-9                                |                        | 93.40    |
| 100.0E-9                               |                        | 3.57     |
| 1.0E-6                                 |                        | 0.79     |
| 10.0E-6                                |                        | 52.10    |
| <b>MITOMYCIN C</b>                     |                        |          |
| 10.0E-9                                |                        | 38.16    |
| 100.0E-9                               |                        | 5.61     |
| 1.0E-6                                 |                        | 29.66    |
| 10.0E-6                                |                        | 0.10     |
| <b>MITOTANE</b>                        |                        |          |
| 10.0E-9                                |                        | 102.39   |
| 100.0E-9                               |                        | 77.58    |
| 1.0E-6                                 |                        | 118.09   |
| 10.0E-6                                |                        | 87.27    |
| <b>MITOXANTRONE HYDROCHLORIDE</b>      |                        |          |
| 10.0E-9                                |                        | 88.00    |
| 100.0E-9                               |                        | 1.25     |
| 1.0E-6                                 |                        | 1.22     |
| 10.0E-6                                |                        | 0.93     |

| Compounds and Final Concentrations (M)       | Average of % Viability | Hits (✓) |
|----------------------------------------------|------------------------|----------|
| <b>MODAFINIL</b>                             |                        |          |
| 10.0E-9                                      |                        | 118.50   |
| 100.0E-9                                     |                        | 125.93   |
| 1.0E-6                                       |                        | 112.67   |
| 10.0E-6                                      |                        | 111.35   |
| <b>MOLSIDOMINE</b>                           |                        |          |
| 10.0E-9                                      |                        | 105.80   |
| 100.0E-9                                     |                        | 97.65    |
| 1.0E-6                                       |                        | 100.25   |
| 10.0E-6                                      |                        | 97.91    |
| <b>MONENSIN SODIUM (monensin A is shown)</b> |                        |          |
| 10.0E-9                                      |                        | 117.49   |
| 100.0E-9                                     |                        | 110.63   |
| 1.0E-6                                       |                        | 72.60    |
| 10.0E-6                                      |                        | 32.85    |
| <b>MONOBENZONE</b>                           |                        |          |
| 10.0E-9                                      |                        | 122.68   |
| 100.0E-9                                     |                        | 101.90   |
| 1.0E-6                                       |                        | 96.65    |
| 10.0E-6                                      |                        | 96.23    |
| <b>MONOCROTALINE</b>                         |                        |          |
| 10.0E-9                                      |                        | 139.24   |
| 100.0E-9                                     |                        | 124.50   |
| 1.0E-6                                       |                        | 95.58    |
| 10.0E-6                                      |                        | 92.29    |
| <b>MONTELUKAST SODIUM</b>                    |                        |          |
| 10.0E-9                                      |                        | 91.90    |
| 100.0E-9                                     |                        | 89.68    |
| 1.0E-6                                       |                        | 89.43    |
| 10.0E-6                                      |                        | 87.61    |
| <b>MORANTEL CITRATE</b>                      |                        |          |
| 10.0E-9                                      |                        | 122.91   |
| 100.0E-9                                     |                        | 100.34   |
| 1.0E-6                                       |                        | 102.58   |
| 10.0E-6                                      |                        | 95.07    |
| <b>MORIN</b>                                 |                        |          |
| 10.0E-9                                      |                        | 113.21   |
| 100.0E-9                                     |                        | 114.67   |
| 1.0E-6                                       |                        | 103.10   |
| 10.0E-6                                      |                        | 99.91    |
| <b>MOROXYDINE HYDROCHLORIDE</b>              |                        |          |
| 10.0E-9                                      |                        | 126.04   |
| 100.0E-9                                     |                        | 127.82   |
| 1.0E-6                                       |                        | 130.67   |
| 10.0E-6                                      |                        | 123.20   |
| <b>MOXALACTAM DISODIUM</b>                   |                        |          |
| 10.0E-9                                      |                        | 111.06   |
| 100.0E-9                                     |                        | 100.31   |
| 1.0E-6                                       |                        | 118.08   |
| 10.0E-6                                      |                        | 102.62   |
| <b>MOXIFLOXACIN HYDROCHLORIDE</b>            |                        |          |
| 10.0E-9                                      |                        | 112.42   |
| 100.0E-9                                     |                        | 116.01   |
| 1.0E-6                                       |                        | 97.60    |
| 10.0E-6                                      |                        | 3.35     |
| <b>MOXISLYTE HYDROCHORIDE</b>                |                        |          |
| 10.0E-9                                      |                        | 113.27   |
| 100.0E-9                                     |                        | 124.42   |
| 1.0E-6                                       |                        | 120.80   |
| 10.0E-6                                      |                        | 133.92   |
| <b>MUNDOSERONE</b>                           |                        |          |
| 10.0E-9                                      |                        | 132.84   |
| 100.0E-9                                     |                        | 143.39   |
| 1.0E-6                                       |                        | 104.50   |
| 10.0E-6                                      |                        | 23.16    |
| <b>MUNDULONE</b>                             |                        |          |
| 10.0E-9                                      |                        | 117.71   |
| 100.0E-9                                     |                        | 110.78   |
| 1.0E-6                                       |                        | 81.79    |
| 10.0E-6                                      |                        | 4.71     |
| <b>MUNDULONE ACETATE</b>                     |                        |          |
| 10.0E-9                                      |                        | 110.36   |
| 100.0E-9                                     |                        | 106.16   |
| 1.0E-6                                       |                        | 100.17   |
| 10.0E-6                                      |                        | 44.03    |
| <b>MUPIROCIN</b>                             |                        |          |
| 10.0E-9                                      |                        | 106.01   |
| 100.0E-9                                     |                        | 111.95   |
| 1.0E-6                                       |                        | 101.89   |
| 10.0E-6                                      |                        | 60.10    |

| Compounds and Final Concentrations (M)          | Average of % Viability | Hits (✓) |
|-------------------------------------------------|------------------------|----------|
| <b>MUUROLLADIE-3-ONE</b>                        |                        |          |
| 10.0E-9                                         |                        | 129.68   |
| 100.0E-9                                        |                        | 124.31   |
| 1.0E-6                                          |                        | 119.53   |
| 10.0E-6                                         |                        | 104.89   |
| <b>MYCOPHENOLATE MOFETIL</b>                    |                        |          |
| 10.0E-9                                         |                        | 90.93    |
| 100.0E-9                                        |                        | 90.24    |
| 1.0E-6                                          |                        | 52.92    |
| 10.0E-6                                         |                        | 2.17     |
| <b>MYCOPHENOLIC ACID</b>                        |                        |          |
| 10.0E-9                                         |                        | 110.04   |
| 100.0E-9                                        |                        | 76.58    |
| 1.0E-6                                          |                        | 22.25    |
| 10.0E-6                                         |                        | 1.61     |
| <b>MYOSMINE</b>                                 |                        |          |
| 10.0E-9                                         |                        | 111.72   |
| 100.0E-9                                        |                        | 124.82   |
| 1.0E-6                                          |                        | 119.49   |
| 10.0E-6                                         |                        | 124.26   |
| <b>MYRICETIN</b>                                |                        |          |
| 10.0E-9                                         |                        | 96.60    |
| 100.0E-9                                        |                        | 64.09    |
| 1.0E-6                                          |                        | 37.13    |
| 10.0E-6                                         |                        | 2.64     |
| <b>N-(9-FLUORENYLMETHOXYCARBONYL)-L-LEUCINE</b> |                        |          |
| 10.0E-9                                         |                        | 125.15   |
| 100.0E-9                                        |                        | 116.05   |
| 1.0E-6                                          |                        | 107.38   |
| 10.0E-6                                         |                        | 108.81   |
| <b>N,N-HEXAMETHYLENAMILORIDE</b>                |                        |          |
| 10.0E-9                                         |                        | 102.34   |
| 100.0E-9                                        |                        | 111.09   |
| 1.0E-6                                          |                        | 113.81   |
| 10.0E-6                                         |                        | 94.40    |
| <b>NABUMETONE</b>                               |                        |          |
| 10.0E-9                                         |                        | 110.43   |
| 100.0E-9                                        |                        | 102.97   |
| 1.0E-6                                          |                        | 94.04    |
| 10.0E-6                                         |                        | 105.36   |
| <b>N-ACETYLMURAMIC ACID</b>                     |                        |          |
| 10.0E-9                                         |                        | 104.84   |
| 100.0E-9                                        |                        | 116.20   |
| 1.0E-6                                          |                        | 116.45   |
| 10.0E-6                                         |                        | 122.66   |
| <b>N-ACETYLNEURAMIC ACID</b>                    |                        |          |
| 10.0E-9                                         |                        | 2.09     |
| 100.0E-9                                        |                        | 111.19   |
| 1.0E-6                                          |                        | 101.65   |
| 10.0E-6                                         |                        | 114.09   |
| <b>N-ACETYLPROLINE</b>                          |                        |          |
| 10.0E-9                                         |                        | 103.05   |
| 100.0E-9                                        |                        | 100.84   |
| 1.0E-6                                          |                        | 100.37   |
| 10.0E-6                                         |                        | 99.44    |
| <b>NADIDE</b>                                   |                        |          |
| 10.0E-9                                         |                        | 114.60   |
| 100.0E-9                                        |                        | 125.67   |
| 1.0E-6                                          |                        | 97.56    |
| 10.0E-6                                         |                        | 94.69    |
| <b>NADOLOL</b>                                  |                        |          |
| 10.0E-9                                         |                        | 116.12   |
| 100.0E-9                                        |                        | 116.48   |
| 1.0E-6                                          |                        | 104.46   |
| 10.0E-6                                         |                        | 108.48   |
| <b>NAFCILLIN SODIUM</b>                         |                        |          |
| 10.0E-9                                         |                        | 108.87   |
| 100.0E-9                                        |                        | 113.21   |
| 1.0E-6                                          |                        | 115.41   |
| 10.0E-6                                         |                        | 107.46   |
| <b>NAFRONYL OXALATE</b>                         |                        |          |
| 10.0E-9                                         |                        | 123.49   |
| 100.0E-9                                        |                        | 111.21   |
| 1.0E-6                                          |                        | 99.21    |
| 10.0E-6                                         |                        | 77.88    |
| <b>NAFTOPIDIL DIHYDROCHLORIDE</b>               |                        |          |
| 10.0E-9                                         |                        | 116.43   |
| 100.0E-9                                        |                        | 132.10   |
| 1.0E-6                                          |                        | 120.78   |
| 10.0E-6                                         |                        | 112.52   |

| Compounds and Final Concentrations (M) | Average of % Viability | Hits (✓) |
|----------------------------------------|------------------------|----------|
| <b>NALBUPHINE HYDROCHLORIDE</b>        |                        |          |
| 10.0E-9                                |                        | 86.86    |
| 100.0E-9                               |                        | 93.46    |
| 1.0E-6                                 |                        | 94.02    |
| 10.0E-6                                |                        | 97.66    |
| <b>NALIDIXIC ACID</b>                  |                        |          |
| 10.0E-9                                |                        | 112.03   |
| 100.0E-9                               |                        | 114.56   |
| 1.0E-6                                 |                        | 109.34   |
| 10.0E-6                                |                        | 104.50   |
| <b>NALOXONE HYDROCHLORIDE</b>          |                        |          |
| 10.0E-9                                |                        | 102.32   |
| 100.0E-9                               |                        | 113.24   |
| 1.0E-6                                 |                        | 104.55   |
| 10.0E-6                                |                        | 105.59   |
| <b>NALTREXONE HYDROCHLORIDE</b>        |                        |          |
| 10.0E-9                                |                        | 98.11    |
| 100.0E-9                               |                        | 116.83   |
| 1.0E-6                                 |                        | 117.28   |
| 10.0E-6                                |                        | 85.96    |
| <b>NAPHAZOLINE HYDROCHLORIDE</b>       |                        |          |
| 10.0E-9                                |                        | 100.57   |
| 100.0E-9                               |                        | 114.69   |
| 1.0E-6                                 |                        | 111.00   |
| 10.0E-6                                |                        | 106.25   |
| <b>NAPROXEN(+)</b>                     |                        |          |
| 10.0E-9                                |                        | 110.96   |
| 100.0E-9                               |                        | 113.82   |
| 1.0E-6                                 |                        | 104.24   |
| 10.0E-6                                |                        | 111.07   |
| <b>NAPROXOL</b>                        |                        |          |
| 10.0E-9                                |                        | 106.78   |
| 100.0E-9                               |                        | 118.59   |
| 1.0E-6                                 |                        | 93.60    |
| 10.0E-6                                |                        | 100.69   |
| <b>NARINGENIN</b>                      |                        |          |
| 10.0E-9                                |                        | 99.70    |
| 100.0E-9                               |                        | 92.61    |
| 1.0E-6                                 |                        | 99.05    |
| 10.0E-6                                |                        | 79.66    |
| <b>NARINGIN</b>                        |                        |          |
| 10.0E-9                                |                        | 107.69   |
| 100.0E-9                               |                        | 102.72   |
| 1.0E-6                                 |                        | 92.84    |
| 10.0E-6                                |                        | 91.47    |
| <b>NATAMYCIN</b>                       |                        |          |
| 10.0E-9                                |                        | 107.92   |
| 100.0E-9                               |                        | 105.20   |
| 1.0E-6                                 |                        | 111.85   |
| 10.0E-6                                |                        | 99.10    |
| <b>NATEGLINIDE</b>                     |                        |          |
| 10.0E-9                                |                        | 104.32   |
| 100.0E-9                               |                        | 116.83   |
| 1.0E-6                                 |                        | 113.33   |
| 10.0E-6                                |                        | 96.25    |
| <b>NEFOPAM</b>                         |                        |          |
| 10.0E-9                                |                        | 80.31    |
| 100.0E-9                               |                        | 88.82    |
| 1.0E-6                                 |                        | 99.95    |
| 10.0E-6                                |                        | 96.38    |
| <b>NEOMYCIN SULFATE</b>                |                        |          |
| 10.0E-9                                |                        | 91.63    |
| 100.0E-9                               |                        | 85.98    |
| 1.0E-6                                 |                        | 89.68    |
| 10.0E-6                                |                        | 88.94    |
| <b>NEOSTIGMINE BROMIDE</b>             |                        |          |
| 10.0E-9                                |                        | 106.74   |
| 100.0E-9                               |                        | 109.89   |
| 1.0E-6                                 |                        | 99.91    |
| 10.0E-6                                |                        | 96.95    |
| <b>NEROL</b>                           |                        |          |
| 10.0E-9                                |                        | 97.55    |
| 100.0E-9                               |                        | 100.00   |
| 1.0E-6                                 |                        | 94.92    |
| 10.0E-6                                |                        | 76.09    |
| <b>NETILMICIN SULFATE</b>              |                        |          |
| 10.0E-9                                |                        | 110.21   |
| 100.0E-9                               |                        | 96.14    |
| 1.0E-6                                 |                        | 100.28   |
| 10.0E-6                                |                        | 94.16    |

| Compounds and Final Concentrations (M) | Average of % Viability | Hits (✓) |
|----------------------------------------|------------------------|----------|
| <b>NIACIN</b>                          |                        |          |
| 10.0E-9                                |                        | 94.09    |
| 100.0E-9                               |                        | 104.03   |
| 1.0E-6                                 |                        | 96.53    |
| 10.0E-6                                |                        | 91.70    |
| <b>NIACINAMIDE</b>                     |                        |          |
| 10.0E-9                                |                        | 121.40   |
| 100.0E-9                               |                        | 115.02   |
| 1.0E-6                                 |                        | 105.95   |
| 10.0E-6                                |                        | 115.37   |
| <b>NIALAMIDE</b>                       |                        |          |
| 10.0E-9                                |                        | 134.24   |
| 100.0E-9                               |                        | 120.81   |
| 1.0E-6                                 |                        | 149.14   |
| 10.0E-6                                |                        | 116.81   |
| <b>NICARDIPINE HYDROCHLORIDE</b>       |                        |          |
| 10.0E-9                                |                        | 90.37    |
| 100.0E-9                               |                        | 99.47    |
| 1.0E-6                                 |                        | 80.06    |
| 10.0E-6                                |                        | 62.74    |
| <b>NICERGOLINE</b>                     |                        |          |
| 10.0E-9                                |                        | 89.85    |
| 100.0E-9                               |                        | 104.16   |
| 1.0E-6                                 |                        | 112.23   |
| 10.0E-6                                |                        | 96.06    |
| <b>NICLOSAMIDE</b>                     |                        |          |
| 10.0E-9                                |                        | 110.17   |
| 100.0E-9                               |                        | 110.26   |
| 1.0E-6                                 |                        | 113.69   |
| 10.0E-6                                |                        | 103.24   |
| <b>NICOTINE DITARTRATE</b>             |                        |          |
| 10.0E-9                                |                        | 123.63   |
| 100.0E-9                               |                        | 118.98   |
| 1.0E-6                                 |                        | 98.03    |
| 10.0E-6                                |                        | 106.41   |
| <b>NICOTINYL ALCOHOL TARTRATE</b>      |                        |          |
| 10.0E-9                                |                        | 100.04   |
| 100.0E-9                               |                        | 116.03   |
| 1.0E-6                                 |                        | 103.22   |
| 10.0E-6                                |                        | 94.40    |
| <b>NIFEDIPINE</b>                      |                        |          |
| 10.0E-9                                |                        | 106.34   |
| 100.0E-9                               |                        | 110.68   |
| 1.0E-6                                 |                        | 119.00   |
| 10.0E-6                                |                        | 19.50    |
| <b>NIFENAZONE</b>                      |                        |          |
| 10.0E-9                                |                        | 120.51   |
| 100.0E-9                               |                        | 112.39   |
| 1.0E-6                                 |                        | 107.50   |
| 10.0E-6                                |                        | 113.19   |
| <b>NIFLUMIC ACID</b>                   |                        |          |
| 10.0E-9                                |                        | 109.00   |
| 100.0E-9                               |                        | 126.14   |
| 1.0E-6                                 |                        | 117.15   |
| 10.0E-6                                |                        | 118.56   |
| <b>NIFUROXAZIDE</b>                    |                        |          |
| 10.0E-9                                |                        | 123.95   |
| 100.0E-9                               |                        | 103.23   |
| 1.0E-6                                 |                        | 91.59    |
| 10.0E-6                                |                        | 1.35     |
| <b>NILUTAMIDE</b>                      |                        |          |
| 10.0E-9                                |                        | 106.19   |
| 100.0E-9                               |                        | 126.04   |
| 1.0E-6                                 |                        | 129.69   |
| 10.0E-6                                |                        | 88.54    |
| <b>NIMESULIDE</b>                      |                        |          |
| 10.0E-9                                |                        | 116.07   |
| 100.0E-9                               |                        | 118.16   |
| 1.0E-6                                 |                        | 111.39   |
| 10.0E-6                                |                        | 111.06   |
| <b>NIMODIPINE</b>                      |                        |          |
| 10.0E-9                                |                        | 103.02   |
| 100.0E-9                               |                        | 96.88    |
| 1.0E-6                                 |                        | 90.94    |
| 10.0E-6                                |                        | 93.72    |
| <b>NIMUSTINE</b>                       |                        |          |
| 10.0E-9                                |                        | 94.54    |
| 100.0E-9                               |                        | 104.67   |
| 1.0E-6                                 |                        | 96.62    |
| 10.0E-6                                |                        | 19.10    |

| Compounds and Final Concentrations (M)   | Average of % Viability | Hits (✓) |
|------------------------------------------|------------------------|----------|
| <b>NIPECOTIC ACID</b>                    |                        |          |
| 10.0E-9                                  |                        | 127.00   |
| 100.0E-9                                 |                        | 112.62   |
| 1.0E-6                                   |                        | 108.30   |
| 10.0E-6                                  |                        | 115.75   |
| <b>NISOLDIPINE</b>                       |                        |          |
| 10.0E-9                                  |                        | 86.86    |
| 100.0E-9                                 |                        | 84.80    |
| 1.0E-6                                   |                        | 85.53    |
| 10.0E-6                                  |                        | 43.04    |
| <b>NITHIAMIDE</b>                        |                        |          |
| 10.0E-9                                  |                        | 111.82   |
| 100.0E-9                                 |                        | 121.07   |
| 1.0E-6                                   |                        | 115.55   |
| 10.0E-6                                  |                        | 113.42   |
| <b>NITRENDIPINE</b>                      |                        |          |
| 10.0E-9                                  |                        | 105.79   |
| 100.0E-9                                 |                        | 104.18   |
| 1.0E-6                                   |                        | 111.56   |
| 10.0E-6                                  |                        | 81.69    |
| <b>NITROFURANTOIN</b>                    |                        |          |
| 10.0E-9                                  |                        | 101.52   |
| 100.0E-9                                 |                        | 108.73   |
| 1.0E-6                                   |                        | 105.57   |
| 10.0E-6                                  |                        | 19.44    |
| <b>NITROFURAZONE</b>                     |                        |          |
| 10.0E-9                                  |                        | 103.56   |
| 100.0E-9                                 |                        | 95.68    |
| 1.0E-6                                   |                        | 90.35    |
| 10.0E-6                                  |                        | 31.68    |
| <b>NITROMIDE</b>                         |                        |          |
| 10.0E-9                                  |                        | 99.98    |
| 100.0E-9                                 |                        | 76.85    |
| 1.0E-6                                   |                        | 82.62    |
| 10.0E-6                                  |                        | 54.03    |
| <b>NIZATIDINE</b>                        |                        |          |
| 10.0E-9                                  |                        | 115.33   |
| 100.0E-9                                 |                        | 98.04    |
| 1.0E-6                                   |                        | 97.50    |
| 10.0E-6                                  |                        | 99.71    |
| <b>N-METHYLANTHRANILIC ACID</b>          |                        |          |
| 10.0E-9                                  |                        | 116.40   |
| 100.0E-9                                 |                        | 148.88   |
| 1.0E-6                                   |                        | 115.97   |
| 10.0E-6                                  |                        | 118.94   |
| <b>N-METHYLBENZYLAMINE HYDROCHLORIDE</b> |                        |          |
| 10.0E-9                                  |                        | 138.99   |
| 100.0E-9                                 |                        | 129.51   |
| 1.0E-6                                   |                        | 129.00   |
| 10.0E-6                                  |                        | 100.13   |
| <b>N-METHYL-D-ASPARTIC ACID (NMDA)</b>   |                        |          |
| 10.0E-9                                  |                        | 96.04    |
| 100.0E-9                                 |                        | 88.62    |
| 1.0E-6                                   |                        | 93.88    |
| 10.0E-6                                  |                        | 2.46     |
| <b>N-METHYLISOLEUCINE</b>                |                        |          |
| 10.0E-9                                  |                        | 115.31   |
| 100.0E-9                                 |                        | 144.70   |
| 1.0E-6                                   |                        | 121.49   |
| 10.0E-6                                  |                        | 110.51   |
| <b>NOBILETIN</b>                         |                        |          |
| 10.0E-9                                  |                        | 132.66   |
| 100.0E-9                                 |                        | 121.50   |
| 1.0E-6                                   |                        | 114.02   |
| 10.0E-6                                  |                        | 99.38    |
| <b>NOCODAZOLE</b>                        |                        |          |
| 10.0E-9                                  |                        | 120.57   |
| 100.0E-9                                 |                        | 113.26   |
| 1.0E-6                                   |                        | 111.21   |
| 10.0E-6                                  |                        | 1.67     |
| <b>NOMIFENSINE MALEATE</b>               |                        |          |
| 10.0E-9                                  |                        | 105.62   |
| 100.0E-9                                 |                        | 107.88   |
| 1.0E-6                                   |                        | 108.00   |
| 10.0E-6                                  |                        | 119.44   |
| <b>NONIC ACID</b>                        |                        |          |
| 10.0E-9                                  |                        | 128.91   |
| 100.0E-9                                 |                        | 123.38   |
| 1.0E-6                                   |                        | 110.78   |
| 10.0E-6                                  |                        | 99.77    |



| Compounds and Final Concentrations (M) | Average of % Viability | Hits (✓) |
|----------------------------------------|------------------------|----------|
| <b>NONOXYNOL-9</b>                     |                        |          |
| 10.0E-9                                |                        | 104.51   |
| 100.0E-9                               |                        | 103.39   |
| 1.0E-6                                 |                        | 90.77    |
| 10.0E-6                                |                        | 32.56    |
| <b>NORCANTHARIDIN</b>                  |                        |          |
| 10.0E-9                                |                        | 95.15    |
| 100.0E-9                               |                        | 100.45   |
| 1.0E-6                                 |                        | 103.02   |
| 10.0E-6                                |                        | 12.07    |
| <b>NOREPINEPHRINE</b>                  |                        |          |
| 10.0E-9                                |                        | 101.66   |
| 100.0E-9                               |                        | 110.86   |
| 1.0E-6                                 |                        | 94.69    |
| 10.0E-6                                |                        | 96.91    |
| <b>NORETHINDRONE</b>                   |                        |          |
| 10.0E-9                                |                        | 108.92   |
| 100.0E-9                               |                        | 112.21   |
| 1.0E-6                                 |                        | 102.24   |
| 10.0E-6                                |                        | 78.89    |
| <b>NORETHINDRONE ACETATE</b>           |                        |          |
| 10.0E-9                                |                        | 83.26    |
| 100.0E-9                               |                        | 65.56    |
| 1.0E-6                                 |                        | 92.59    |
| 10.0E-6                                |                        | 83.48    |
| <b>NORETHYNODREL</b>                   |                        |          |
| 10.0E-9                                |                        | 107.47   |
| 100.0E-9                               |                        | 113.73   |
| 1.0E-6                                 |                        | 103.43   |
| 10.0E-6                                |                        | 69.48    |
| <b>NORFLOXACIN</b>                     |                        |          |
| 10.0E-9                                |                        | 99.43    |
| 100.0E-9                               |                        | 112.81   |
| 1.0E-6                                 |                        | 100.91   |
| 10.0E-6                                |                        | 102.13   |
| <b>NORGESTIMATE</b>                    |                        |          |
| 10.0E-9                                |                        | 112.86   |
| 100.0E-9                               |                        | 100.92   |
| 1.0E-6                                 |                        | 98.47    |
| 10.0E-6                                |                        | 33.25    |
| <b>NORGESTREL</b>                      |                        |          |
| 10.0E-9                                |                        | 115.16   |
| 100.0E-9                               |                        | 114.27   |
| 1.0E-6                                 |                        | 107.53   |
| 10.0E-6                                |                        | 111.06   |
| <b>NORHARMAN</b>                       |                        |          |
| 10.0E-9                                |                        | 103.64   |
| 100.0E-9                               |                        | 107.20   |
| 1.0E-6                                 |                        | 120.09   |
| 10.0E-6                                |                        | 110.44   |
| <b>NORSTICTIC ACID</b>                 |                        |          |
| 10.0E-9                                |                        | 100.41   |
| 100.0E-9                               |                        | 85.06    |
| 1.0E-6                                 |                        | 85.34    |
| 10.0E-6                                |                        | 87.97    |
| <b>NORSTICTIC ACID PENTAACETATE</b>    |                        |          |
| 10.0E-9                                |                        | 102.99   |
| 100.0E-9                               |                        | 128.31   |
| 1.0E-6                                 |                        | 114.60   |
| 10.0E-6                                |                        | 117.48   |
| <b>NORTRIPTYLINE</b>                   |                        |          |
| 10.0E-9                                |                        | 97.79    |
| 100.0E-9                               |                        | 110.39   |
| 1.0E-6                                 |                        | 99.95    |
| 10.0E-6                                |                        | 81.73    |
| <b>NOSCAPINE HYDROCHLORIDE</b>         |                        |          |
| 10.0E-9                                |                        | 99.00    |
| 100.0E-9                               |                        | 107.72   |
| 1.0E-6                                 |                        | 93.21    |
| 10.0E-6                                |                        | 82.78    |
| <b>NOVOBIOCIN SODIUM</b>               |                        |          |
| 10.0E-9                                |                        | 110.69   |
| 100.0E-9                               |                        | 109.25   |
| 1.0E-6                                 |                        | 102.64   |
| 10.0E-6                                |                        | 102.04   |
| <b>N-PHENYLANTHRANILIC ACID</b>        |                        |          |
| 10.0E-9                                |                        | 105.45   |
| 100.0E-9                               |                        | 94.60    |
| 1.0E-6                                 |                        | 97.89    |
| 10.0E-6                                |                        | 103.09   |

| Compounds and Final Concentrations (M) | Average of % Viability                                                                | Hits (✓) |
|----------------------------------------|---------------------------------------------------------------------------------------|----------|
| <b>NYLIDRIN HYDROCHLORIDE</b>          |                                                                                       |          |
| 10.0E-9                                |    | 117.97   |
| 100.0E-9                               |    | 114.08   |
| 1.0E-6                                 |    | 86.40    |
| 10.0E-6                                |    | 95.36    |
| <b>NYSTATIN</b>                        |                                                                                       |          |
| 10.0E-9                                |    | 112.63   |
| 100.0E-9                               |    | 107.53   |
| 1.0E-6                                 |    | 102.84   |
| 10.0E-6                                |    | 107.22   |
| <b>O-BENZYL-L-SERINE</b>               |                                                                                       |          |
| 10.0E-9                                |    | 108.33   |
| 100.0E-9                               |    | 102.04   |
| 1.0E-6                                 |    | 111.18   |
| 10.0E-6                                |    | 102.47   |
| <b>OBLIQUIN</b>                        |                                                                                       |          |
| 10.0E-9                                |    | 108.90   |
| 100.0E-9                               |    | 109.80   |
| 1.0E-6                                 |    | 111.04   |
| 10.0E-6                                |    | 52.30    |
| <b>OBTUSAQUINONE</b>                   |                                                                                       |          |
| 10.0E-9                                |    | 128.21   |
| 100.0E-9                               |    | 119.06   |
| 1.0E-6                                 |    | 106.41   |
| 10.0E-6                                |    | 53.40    |
| <b>OCTISALATE</b>                      |                                                                                       |          |
| 10.0E-9                                |    | 106.65   |
| 100.0E-9                               |    | 112.91   |
| 1.0E-6                                 |    | 114.08   |
| 10.0E-6                                |    | 109.07   |
| <b>OCTODRINE</b>                       |                                                                                       |          |
| 10.0E-9                                |    | 120.71   |
| 100.0E-9                               |    | 100.21   |
| 1.0E-6                                 |    | 112.91   |
| 10.0E-6                                |    | 104.17   |
| <b>OCTOPAMINE HYDROCHLORIDE</b>        |                                                                                       |          |
| 10.0E-9                                |   | 110.25   |
| 100.0E-9                               |  | 100.90   |
| 1.0E-6                                 |  | 109.17   |
| 10.0E-6                                |  | 86.53    |
| <b>OFLOXACIN</b>                       |                                                                                       |          |
| 10.0E-9                                |  | 110.35   |
| 100.0E-9                               |  | 110.45   |
| 1.0E-6                                 |  | 104.73   |
| 10.0E-6                                |  | 100.61   |
| <b>OLEANOIC ACID</b>                   |                                                                                       |          |
| 10.0E-9                                |  | 136.55   |
| 100.0E-9                               |  | 117.74   |
| 1.0E-6                                 |  | 111.09   |
| 10.0E-6                                |  | 103.14   |
| <b>OLEANOLIC ACID ACETATE</b>          |                                                                                       |          |
| 10.0E-9                                |  | 111.56   |
| 100.0E-9                               |  | 115.98   |
| 1.0E-6                                 |  | 97.72    |
| 10.0E-6                                |  | 102.57   |
| <b>OLMESARTAN MEDOXOMIL</b>            |                                                                                       |          |
| 10.0E-9                                |  | 121.71   |
| 100.0E-9                               |  | 103.47   |
| 1.0E-6                                 |  | 105.89   |
| 10.0E-6                                |  | 102.45   |
| <b>OLSELTAMIVIR PHOSPHATE</b>          |                                                                                       |          |
| 10.0E-9                                |  | 130.67   |
| 100.0E-9                               |  | 118.18   |
| 1.0E-6                                 |  | 103.20   |
| 10.0E-6                                |  | 105.13   |
| <b>OMEGA-3-ACID ESTERS (EPA shown)</b> |                                                                                       |          |
| 10.0E-9                                |  | 122.01   |
| 100.0E-9                               |  | 122.57   |
| 1.0E-6                                 |  | 102.27   |
| 10.0E-6                                |  | 64.36    |
| <b>OMEPRAZOLE</b>                      |                                                                                       |          |
| 10.0E-9                                |  | 104.41   |
| 100.0E-9                               |  | 113.81   |
| 1.0E-6                                 |  | 104.47   |
| 10.0E-6                                |  | 99.30    |
| <b>ONONETIN</b>                        |                                                                                       |          |
| 10.0E-9                                |  | 136.02   |
| 100.0E-9                               |  | 111.63   |
| 1.0E-6                                 |  | 119.22   |
| 10.0E-6                                |  | 115.97   |

| Compounds and Final Concentrations (M) | Average of % Viability | Hits (✓) |
|----------------------------------------|------------------------|----------|
| <b>ORBIFLOXACIN</b>                    |                        |          |
| 10.0E-9                                |                        | 118.35   |
| 100.0E-9                               |                        | 122.64   |
| 1.0E-6                                 |                        | 105.14   |
| 10.0E-6                                |                        | 110.78   |
| <b>ORLISTAT</b>                        |                        |          |
| 10.0E-9                                |                        | 99.85    |
| 100.0E-9                               |                        | 113.66   |
| 1.0E-6                                 |                        | 93.46    |
| 10.0E-6                                |                        | 55.29    |
| <b>ORNIDAZOLE</b>                      |                        |          |
| 10.0E-9                                |                        | 120.44   |
| 100.0E-9                               |                        | 124.63   |
| 1.0E-6                                 |                        | 103.39   |
| 10.0E-6                                |                        | 113.55   |
| <b>ORNITHINE</b>                       |                        |          |
| 10.0E-9                                |                        | 111.90   |
| 100.0E-9                               |                        | 143.99   |
| 1.0E-6                                 |                        | 108.99   |
| 10.0E-6                                |                        | 106.85   |
| <b>OTROTIC ACID</b>                    |                        |          |
| 10.0E-9                                |                        | 111.13   |
| 100.0E-9                               |                        | 123.42   |
| 1.0E-6                                 |                        | 107.62   |
| 10.0E-6                                |                        | 111.75   |
| <b>ORPHENADRINE CITRATE</b>            |                        |          |
| 10.0E-9                                |                        | 121.91   |
| 100.0E-9                               |                        | 117.79   |
| 1.0E-6                                 |                        | 120.83   |
| 10.0E-6                                |                        | 114.19   |
| <b>ORSELLINIC ACID</b>                 |                        |          |
| 10.0E-9                                |                        | 143.21   |
| 100.0E-9                               |                        | 144.77   |
| 1.0E-6                                 |                        | 125.41   |
| 10.0E-6                                |                        | 109.85   |
| <b>ORSELLINIC ACID, ETHYL ESTER</b>    |                        |          |
| 10.0E-9                                |                        | 113.62   |
| 100.0E-9                               |                        | 111.16   |
| 1.0E-6                                 |                        | 127.34   |
| 10.0E-6                                |                        | 109.90   |
| <b>OSAJIN</b>                          |                        |          |
| 10.0E-9                                |                        | 125.43   |
| 100.0E-9                               |                        | 109.35   |
| 1.0E-6                                 |                        | 124.28   |
| 10.0E-6                                |                        | 89.59    |
| <b>OUABAIN</b>                         |                        |          |
| 10.0E-9                                |                        | 96.39    |
| 100.0E-9                               |                        | 93.97    |
| 1.0E-6                                 |                        | 1.63     |
| 10.0E-6                                |                        | 1.90     |
| <b>OXACILLIN SODIUM</b>                |                        |          |
| 10.0E-9                                |                        | 104.61   |
| 100.0E-9                               |                        | 104.90   |
| 1.0E-6                                 |                        | 108.57   |
| 10.0E-6                                |                        | 106.94   |
| <b>OXALAMINE CITRATE</b>               |                        |          |
| 10.0E-9                                |                        | 92.17    |
| 100.0E-9                               |                        | 82.57    |
| 1.0E-6                                 |                        | 83.38    |
| 10.0E-6                                |                        | 63.97    |
| <b>OXANTEL PAMOATE</b>                 |                        |          |
| 10.0E-9                                |                        | 122.01   |
| 100.0E-9                               |                        | 115.32   |
| 1.0E-6                                 |                        | 108.05   |
| 10.0E-6                                |                        | 107.32   |
| <b>OXAPROZIN</b>                       |                        |          |
| 10.0E-9                                |                        | 118.00   |
| 100.0E-9                               |                        | 108.11   |
| 1.0E-6                                 |                        | 117.49   |
| 10.0E-6                                |                        | 109.47   |
| <b>OXCARBAZEPINE</b>                   |                        |          |
| 10.0E-9                                |                        | 115.02   |
| 100.0E-9                               |                        | 113.52   |
| 1.0E-6                                 |                        | 109.56   |
| 10.0E-6                                |                        | 109.59   |
| <b>OXEDRINE</b>                        |                        |          |
| 10.0E-9                                |                        | 113.26   |
| 100.0E-9                               |                        | 117.38   |
| 1.0E-6                                 |                        | 112.79   |
| 10.0E-6                                |                        | 121.12   |

| Compounds and Final Concentrations (M) | Average of % Viability | Hits (✓) |
|----------------------------------------|------------------------|----------|
| <b>OXELAIDIN CITRATE</b>               |                        |          |
| 10.0E-9                                |                        | 112.33   |
| 100.0E-9                               |                        | 99.23    |
| 1.0E-6                                 |                        | 107.72   |
| 10.0E-6                                |                        | 82.66    |
| <b>OXETHAZAINE</b>                     |                        |          |
| 10.0E-9                                |                        | 115.55   |
| 100.0E-9                               |                        | 108.63   |
| 1.0E-6                                 |                        | 115.49   |
| 10.0E-6                                |                        | 97.01    |
| <b>OXFENDAZOLE</b>                     |                        |          |
| 10.0E-9                                |                        | 132.41   |
| 100.0E-9                               |                        | 116.39   |
| 1.0E-6                                 |                        | 89.18    |
| 10.0E-6                                |                        | 110.78   |
| <b>OXIBENDAZOLE</b>                    |                        |          |
| 10.0E-9                                |                        | 123.76   |
| 100.0E-9                               |                        | 104.73   |
| 1.0E-6                                 |                        | 38.29    |
| 10.0E-6                                |                        | 0.79     |
| <b>OXICONAZOLE NITRATE</b>             |                        |          |
| 10.0E-9                                |                        | 112.26   |
| 100.0E-9                               |                        | 103.11   |
| 1.0E-6                                 |                        | 104.75   |
| 10.0E-6                                |                        | 85.51    |
| <b>OXIDOPAMINE HYDROCHLORIDE</b>       |                        |          |
| 10.0E-9                                |                        | 92.27    |
| 100.0E-9                               |                        | 61.44    |
| 1.0E-6                                 |                        | 100.33   |
| 10.0E-6                                |                        | 84.71    |
| <b>OXIGLUTATIONE DISODIUM SALT</b>     |                        |          |
| 10.0E-9                                |                        | 101.59   |
| 100.0E-9                               |                        | 105.06   |
| 1.0E-6                                 |                        | 93.31    |
| 10.0E-6                                |                        | 97.56    |
| <b>OXOLINIC ACID</b>                   |                        |          |
| 10.0E-9                                |                        | 112.29   |
| 100.0E-9                               |                        | 119.69   |
| 1.0E-6                                 |                        | 110.57   |
| 10.0E-6                                |                        | 108.22   |
| <b>OXONITINE</b>                       |                        |          |
| 10.0E-9                                |                        | 114.04   |
| 100.0E-9                               |                        | 117.77   |
| 1.0E-6                                 |                        | 110.17   |
| 10.0E-6                                |                        | 89.57    |
| <b>OXYBENZONE</b>                      |                        |          |
| 10.0E-9                                |                        | 104.15   |
| 100.0E-9                               |                        | 119.10   |
| 1.0E-6                                 |                        | 104.43   |
| 10.0E-6                                |                        | 95.19    |
| <b>OXYBUTYNIN CHLORIDE</b>             |                        |          |
| 10.0E-9                                |                        | 110.76   |
| 100.0E-9                               |                        | 114.89   |
| 1.0E-6                                 |                        | 109.88   |
| 10.0E-6                                |                        | 71.44    |
| <b>OXYMETAZOLINE HYDROCHLORIDE</b>     |                        |          |
| 10.0E-9                                |                        | 110.75   |
| 100.0E-9                               |                        | 116.47   |
| 1.0E-6                                 |                        | 112.04   |
| 10.0E-6                                |                        | 104.52   |
| <b>OXYPHENBUTAZONE</b>                 |                        |          |
| 10.0E-9                                |                        | 109.56   |
| 100.0E-9                               |                        | 121.59   |
| 1.0E-6                                 |                        | 74.29    |
| 10.0E-6                                |                        | 10.92    |
| <b>OXYPHENCYCLIMINE HYDROCHLORIDE</b>  |                        |          |
| 10.0E-9                                |                        | 115.02   |
| 100.0E-9                               |                        | 116.47   |
| 1.0E-6                                 |                        | 112.99   |
| 10.0E-6                                |                        | 107.34   |
| <b>OXYPHENONIUM BROMIDE</b>            |                        |          |
| 10.0E-9                                |                        | 123.95   |
| 100.0E-9                               |                        | 111.43   |
| 1.0E-6                                 |                        | 102.03   |
| 10.0E-6                                |                        | 111.49   |
| <b>OXYQUINOLINE HEMISULFATE</b>        |                        |          |
| 10.0E-9                                |                        | 96.12    |
| 100.0E-9                               |                        | 99.51    |
| 1.0E-6                                 |                        | 100.58   |
| 10.0E-6                                |                        | -0.06    |

| Compounds and Final Concentrations (M)    | Average of % Viability | Hits (✓) |
|-------------------------------------------|------------------------|----------|
| <b>OXYTETRACYCLINE</b>                    |                        |          |
| 10.0E-9                                   |                        | 116.71   |
| 100.0E-9                                  |                        | 111.36   |
| 1.0E-6                                    |                        | 100.10   |
| 10.0E-6                                   |                        | 86.09    |
| <b>OXYTHIAMINE CHLORIDE HYDROCHLORIDE</b> |                        |          |
| 10.0E-9                                   |                        | 108.01   |
| 100.0E-9                                  |                        | 100.85   |
| 1.0E-6                                    |                        | 97.70    |
| 10.0E-6                                   |                        | 109.58   |
| <b>PACHYRRHIZIN</b>                       |                        |          |
| 10.0E-9                                   |                        | 137.26   |
| 100.0E-9                                  |                        | 124.12   |
| 1.0E-6                                    |                        | 109.94   |
| 10.0E-6                                   |                        | 82.00    |
| <b>PACLITAXEL</b>                         |                        |          |
| 10.0E-9                                   |                        | 1.70     |
| 100.0E-9                                  |                        | 1.92     |
| 1.0E-6                                    |                        | 1.40     |
| 10.0E-6                                   |                        | 1.33     |
| <b>PAEONOL</b>                            |                        |          |
| 10.0E-9                                   |                        | 125.83   |
| 100.0E-9                                  |                        | 113.15   |
| 1.0E-6                                    |                        | 114.51   |
| 10.0E-6                                   |                        | 99.97    |
| <b>PALMATINE</b>                          |                        |          |
| 10.0E-9                                   |                        | 120.06   |
| 100.0E-9                                  |                        | 112.60   |
| 1.0E-6                                    |                        | 91.71    |
| 10.0E-6                                   |                        | 29.00    |
| <b>PALMATINE CHLORIDE</b>                 |                        |          |
| 10.0E-9                                   |                        | 110.05   |
| 100.0E-9                                  |                        | 110.69   |
| 1.0E-6                                    |                        | 105.88   |
| 10.0E-6                                   |                        | 40.74    |
| <b>PANCURONIUM BROMIDE</b>                |                        |          |
| 10.0E-9                                   |                        | 109.86   |
| 100.0E-9                                  |                        | 102.61   |
| 1.0E-6                                    |                        | 95.64    |
| 10.0E-6                                   |                        | 94.55    |
| <b>PANGAMIC ACID SODIUM</b>               |                        |          |
| 10.0E-9                                   |                        | 113.65   |
| 100.0E-9                                  |                        | 124.27   |
| 1.0E-6                                    |                        | 121.38   |
| 10.0E-6                                   |                        | 130.46   |
| <b>PANTETHINE</b>                         |                        |          |
| 10.0E-9                                   |                        | 115.94   |
| 100.0E-9                                  |                        | 132.22   |
| 1.0E-6                                    |                        | 97.70    |
| 10.0E-6                                   |                        | 27.55    |
| <b>PANTOPRAZOLE</b>                       |                        |          |
| 10.0E-9                                   |                        | 106.56   |
| 100.0E-9                                  |                        | 114.24   |
| 1.0E-6                                    |                        | 100.18   |
| 10.0E-6                                   |                        | 90.64    |
| <b>PANTOTHENIC ACID(d) Na salt</b>        |                        |          |
| 10.0E-9                                   |                        | 99.79    |
| 100.0E-9                                  |                        | 105.74   |
| 1.0E-6                                    |                        | 114.64   |
| 10.0E-6                                   |                        | 94.71    |
| <b>PAPAVERINE HYDROCHLORIDE</b>           |                        |          |
| 10.0E-9                                   |                        | 105.06   |
| 100.0E-9                                  |                        | 98.44    |
| 1.0E-6                                    |                        | 78.84    |
| 10.0E-6                                   |                        | 39.16    |
| <b>PARACHLOROPHENOL</b>                   |                        |          |
| 10.0E-9                                   |                        | 106.35   |
| 100.0E-9                                  |                        | 113.45   |
| 1.0E-6                                    |                        | 106.42   |
| 10.0E-6                                   |                        | 30.79    |
| <b>PARAMETHADIONE</b>                     |                        |          |
| 10.0E-9                                   |                        | 120.15   |
| 100.0E-9                                  |                        | 115.97   |
| 1.0E-6                                    |                        | 108.17   |
| 10.0E-6                                   |                        | 109.05   |
| <b>PARAROSANILINE PAMOATE</b>             |                        |          |
| 10.0E-9                                   |                        | 90.38    |
| 100.0E-9                                  |                        | 91.05    |
| 1.0E-6                                    |                        | 65.60    |
| 10.0E-6                                   |                        | 0.74     |

| Compounds and Final Concentrations (M) | Average of % Viability | Hits (✓) |
|----------------------------------------|------------------------|----------|
| <b>PARAXANTHINE</b>                    |                        |          |
| 10.0E-9                                |                        | 108.72   |
| 100.0E-9                               |                        | 105.05   |
| 1.0E-6                                 |                        | 112.75   |
| 10.0E-6                                |                        | 107.25   |
| <b>PARGYLINE HYDROCHLORIDE</b>         |                        |          |
| 10.0E-9                                |                        | 106.38   |
| 100.0E-9                               |                        | 106.40   |
| 1.0E-6                                 |                        | 99.75    |
| 10.0E-6                                |                        | 105.51   |
| <b>PAROMOMYCIN SULFATE</b>             |                        |          |
| 10.0E-9                                |                        | 105.55   |
| 100.0E-9                               |                        | 85.31    |
| 1.0E-6                                 |                        | 85.85    |
| 10.0E-6                                |                        | 90.90    |
| <b>PAROXETINE HYDROCHLORIDE</b>        |                        |          |
| 10.0E-9                                |                        | 98.72    |
| 100.0E-9                               |                        | 85.48    |
| 1.0E-6                                 |                        | 90.86    |
| 10.0E-6                                |                        | 68.95    |
| <b>PARTHENOLIDE</b>                    |                        |          |
| 10.0E-9                                |                        | 126.23   |
| 100.0E-9                               |                        | 123.08   |
| 1.0E-6                                 |                        | 120.96   |
| 10.0E-6                                |                        | 2.64     |
| <b>PASINIAZID</b>                      |                        |          |
| 10.0E-9                                |                        | 123.12   |
| 100.0E-9                               |                        | 130.03   |
| 1.0E-6                                 |                        | 117.94   |
| 10.0E-6                                |                        | 104.87   |
| <b>PATULIN</b>                         |                        |          |
| 10.0E-9                                |                        | 131.04   |
| 100.0E-9                               |                        | 97.17    |
| 1.0E-6                                 |                        | 1.30     |
| 10.0E-6                                |                        | -0.03    |
| <b>p-CHLOROPHENYLALANINE</b>           |                        |          |
| 10.0E-9                                |                        | 118.68   |
| 100.0E-9                               |                        | 121.42   |
| 1.0E-6                                 |                        | 116.37   |
| 10.0E-6                                |                        | 116.19   |
| <b>PECTOLINARIN</b>                    |                        |          |
| 10.0E-9                                |                        | 139.36   |
| 100.0E-9                               |                        | 136.71   |
| 1.0E-6                                 |                        | 111.60   |
| 10.0E-6                                |                        | 113.86   |
| <b>PEFLOXACINE MESYLATE</b>            |                        |          |
| 10.0E-9                                |                        | 119.99   |
| 100.0E-9                               |                        | 116.52   |
| 1.0E-6                                 |                        | 107.40   |
| 10.0E-6                                |                        | 105.38   |
| <b>PELLETIERINE HYDROCHLORIDE</b>      |                        |          |
| 10.0E-9                                |                        | 98.27    |
| 100.0E-9                               |                        | 81.58    |
| 1.0E-6                                 |                        | 84.73    |
| 10.0E-6                                |                        | 78.02    |
| <b>PEMPIDINE TARTRATE</b>              |                        |          |
| 10.0E-9                                |                        | 130.22   |
| 100.0E-9                               |                        | 111.45   |
| 1.0E-6                                 |                        | 110.33   |
| 10.0E-6                                |                        | 117.22   |
| <b>PENFLURIDOL</b>                     |                        |          |
| 10.0E-9                                |                        | 104.71   |
| 100.0E-9                               |                        | 103.12   |
| 1.0E-6                                 |                        | 101.57   |
| 10.0E-6                                |                        | 0.31     |
| <b>PENICILLAMINE</b>                   |                        |          |
| 10.0E-9                                |                        | 107.20   |
| 100.0E-9                               |                        | 113.94   |
| 1.0E-6                                 |                        | 111.15   |
| 10.0E-6                                |                        | 94.41    |
| <b>PENICILLIN G POTASSIUM</b>          |                        |          |
| 10.0E-9                                |                        | 95.80    |
| 100.0E-9                               |                        | 97.80    |
| 1.0E-6                                 |                        | 101.99   |
| 10.0E-6                                |                        | 106.36   |
| <b>PENICILLIN V POTASSIUM</b>          |                        |          |
| 10.0E-9                                |                        | 91.33    |
| 100.0E-9                               |                        | 109.96   |
| 1.0E-6                                 |                        | 108.80   |
| 10.0E-6                                |                        | 111.22   |

| Compounds and Final Concentrations (M) | Average of % Viability | Hits (✓) |
|----------------------------------------|------------------------|----------|
| <b>PENTACHLOROPHENOL</b>               |                        |          |
| 10.0E-9                                |                        | 115.48   |
| 100.0E-9                               |                        | 115.79   |
| 1.0E-6                                 |                        | 113.79   |
| 10.0E-6                                |                        | 106.62   |
| <b>PENTAMIDINE ISETHIONATE</b>         |                        |          |
| 10.0E-9                                |                        | 115.85   |
| 100.0E-9                               |                        | 108.82   |
| 1.0E-6                                 |                        | 112.58   |
| 10.0E-6                                |                        | 9.04     |
| <b>PENTETIC ACID</b>                   |                        |          |
| 10.0E-9                                |                        | 89.79    |
| 100.0E-9                               |                        | 91.13    |
| 1.0E-6                                 |                        | 83.68    |
| 10.0E-6                                |                        | 17.92    |
| <b>PENTOXIFYLLINE</b>                  |                        |          |
| 10.0E-9                                |                        | 109.88   |
| 100.0E-9                               |                        | 96.70    |
| 1.0E-6                                 |                        | 88.47    |
| 10.0E-6                                |                        | 91.18    |
| <b>PENTYLENETETRAZOL</b>               |                        |          |
| 10.0E-9                                |                        | 96.87    |
| 100.0E-9                               |                        | 89.67    |
| 1.0E-6                                 |                        | 89.33    |
| 10.0E-6                                |                        | 76.13    |
| <b>PEONIFLORIN</b>                     |                        |          |
| 10.0E-9                                |                        | 110.57   |
| 100.0E-9                               |                        | 119.50   |
| 1.0E-6                                 |                        | 108.20   |
| 10.0E-6                                |                        | 110.62   |
| <b>PERGOLIDE MESYLATE</b>              |                        |          |
| 10.0E-9                                |                        | 122.35   |
| 100.0E-9                               |                        | 113.57   |
| 1.0E-6                                 |                        | 122.59   |
| 10.0E-6                                |                        | 111.63   |
| <b>PERHEXILINE MALEATE</b>             |                        |          |
| 10.0E-9                                |                        | 95.09    |
| 100.0E-9                               |                        | 90.45    |
| 1.0E-6                                 |                        | 88.05    |
| 10.0E-6                                |                        | 83.39    |
| <b>PERICIAZINE</b>                     |                        |          |
| 10.0E-9                                |                        | 94.00    |
| 100.0E-9                               |                        | 93.69    |
| 1.0E-6                                 |                        | 91.98    |
| 10.0E-6                                |                        | 84.33    |
| <b>PERILLIC ACID (-)</b>               |                        |          |
| 10.0E-9                                |                        | 91.26    |
| 100.0E-9                               |                        | 87.74    |
| 1.0E-6                                 |                        | 98.50    |
| 10.0E-6                                |                        | 88.81    |
| <b>PERILLYL ALCOHOL</b>                |                        |          |
| 10.0E-9                                |                        | 113.63   |
| 100.0E-9                               |                        | 101.91   |
| 1.0E-6                                 |                        | 105.12   |
| 10.0E-6                                |                        | 93.17    |
| <b>PERINDOPRIL ERBUMINE</b>            |                        |          |
| 10.0E-9                                |                        | 129.33   |
| 100.0E-9                               |                        | 126.78   |
| 1.0E-6                                 |                        | 111.19   |
| 10.0E-6                                |                        | 110.72   |
| <b>PERPHENAZINE</b>                    |                        |          |
| 10.0E-9                                |                        | 116.37   |
| 100.0E-9                               |                        | 107.62   |
| 1.0E-6                                 |                        | 91.76    |
| 10.0E-6                                |                        | 80.15    |
| <b>PERSEITOL</b>                       |                        |          |
| 10.0E-9                                |                        | 122.35   |
| 100.0E-9                               |                        | 132.69   |
| 1.0E-6                                 |                        | 113.92   |
| 10.0E-6                                |                        | 123.19   |
| <b>PERSEITOL HEPTAACETATE</b>          |                        |          |
| 10.0E-9                                |                        | 130.36   |
| 100.0E-9                               |                        | 133.77   |
| 1.0E-6                                 |                        | 111.54   |
| 10.0E-6                                |                        | 109.66   |
| <b>PERUVOSIDE</b>                      |                        |          |
| 10.0E-9                                |                        | 101.41   |
| 100.0E-9                               |                        | 1.78     |
| 1.0E-6                                 |                        | 2.44     |
| 10.0E-6                                |                        | 2.61     |

| Compounds and Final Concentrations (M) | Average of % Viability | Hits (✓) |
|----------------------------------------|------------------------|----------|
| <b>PEUCENIN</b>                        |                        |          |
| 10.0E-9                                |                        | 122.45   |
| 100.0E-9                               |                        | 114.28   |
| 1.0E-6                                 |                        | 98.32    |
| 10.0E-6                                |                        | 99.37    |
| <b>p-FLUOROPHENYLALANINE</b>           |                        |          |
| 10.0E-9                                |                        | 114.06   |
| 100.0E-9                               |                        | 114.42   |
| 1.0E-6                                 |                        | 106.28   |
| 10.0E-6                                |                        | 105.04   |
| <b>PHENACEMIDE</b>                     |                        |          |
| 10.0E-9                                |                        | 116.33   |
| 100.0E-9                               |                        | 129.62   |
| 1.0E-6                                 |                        | 118.93   |
| 10.0E-6                                |                        | 108.00   |
| <b>PHENACETIN</b>                      |                        |          |
| 10.0E-9                                |                        | 124.70   |
| 100.0E-9                               |                        | 109.65   |
| 1.0E-6                                 |                        | 99.31    |
| 10.0E-6                                |                        | 103.06   |
| <b>PHENACYLAMINE HYDROCHLORIDE</b>     |                        |          |
| 10.0E-9                                |                        | 124.98   |
| 100.0E-9                               |                        | 135.21   |
| 1.0E-6                                 |                        | 121.94   |
| 10.0E-6                                |                        | 112.89   |
| <b>PHENAZOPYRIDINE HYDROCHLORIDE</b>   |                        |          |
| 10.0E-9                                |                        | 120.39   |
| 100.0E-9                               |                        | 123.89   |
| 1.0E-6                                 |                        | 101.99   |
| 10.0E-6                                |                        | 74.56    |
| <b>PHENELZINE SULFATE</b>              |                        |          |
| 10.0E-9                                |                        | 109.26   |
| 100.0E-9                               |                        | 108.49   |
| 1.0E-6                                 |                        | 99.28    |
| 10.0E-6                                |                        | 102.86   |
| <b>PHENETHYL CAFFEATE (CAPE)</b>       |                        |          |
| 10.0E-9                                |                        | 128.69   |
| 100.0E-9                               |                        | 112.54   |
| 1.0E-6                                 |                        | 1.79     |
| 10.0E-6                                |                        | 0.69     |
| <b>PHENFORMIN HYDROCHLORIDE</b>        |                        |          |
| 10.0E-9                                |                        | 111.49   |
| 100.0E-9                               |                        | 108.37   |
| 1.0E-6                                 |                        | 84.38    |
| 10.0E-6                                |                        | 18.62    |
| <b>PHENINDIONE</b>                     |                        |          |
| 10.0E-9                                |                        | 115.94   |
| 100.0E-9                               |                        | 108.17   |
| 1.0E-6                                 |                        | 108.74   |
| 10.0E-6                                |                        | 106.79   |
| <b>PHENIRAMINE MALEATE</b>             |                        |          |
| 10.0E-9                                |                        | 114.49   |
| 100.0E-9                               |                        | 114.41   |
| 1.0E-6                                 |                        | 101.44   |
| 10.0E-6                                |                        | 99.98    |
| <b>PHENOLPHTHALEIN</b>                 |                        |          |
| 10.0E-9                                |                        | 103.55   |
| 100.0E-9                               |                        | 103.43   |
| 1.0E-6                                 |                        | 97.83    |
| 10.0E-6                                |                        | 108.65   |
| <b>PHENOTHRIN</b>                      |                        |          |
| 10.0E-9                                |                        | 113.25   |
| 100.0E-9                               |                        | 106.68   |
| 1.0E-6                                 |                        | 107.76   |
| 10.0E-6                                |                        | 111.65   |
| <b>PHENOXYBENZAMINE HYDROCHLORIDE</b>  |                        |          |
| 10.0E-9                                |                        | 93.90    |
| 100.0E-9                               |                        | 100.64   |
| 1.0E-6                                 |                        | 96.90    |
| 10.0E-6                                |                        | 93.17    |
| <b>PHENTERMINE</b>                     |                        |          |
| 10.0E-9                                |                        | 125.50   |
| 100.0E-9                               |                        | 102.59   |
| 1.0E-6                                 |                        | 108.35   |
| 10.0E-6                                |                        | 114.76   |
| <b>PHENTOLAMINE HYDROCHLORIDE</b>      |                        |          |
| 10.0E-9                                |                        | 112.04   |
| 100.0E-9                               |                        | 79.80    |
| 1.0E-6                                 |                        | 104.52   |
| 10.0E-6                                |                        | 94.70    |



| Compounds and Final Concentrations (M)   | Average of % Viability | Hits (✓) |
|------------------------------------------|------------------------|----------|
| <b>PHENYL AMINOSALICYLATE</b>            |                        |          |
| 10.0E-9                                  |                        | 89.79    |
| 100.0E-9                                 |                        | 93.52    |
| 1.0E-6                                   |                        | 108.76   |
| 10.0E-6                                  |                        | 90.54    |
| <b>PHENYLBUTAZONE</b>                    |                        |          |
| 10.0E-9                                  |                        | 107.79   |
| 100.0E-9                                 |                        | 107.78   |
| 1.0E-6                                   |                        | 94.80    |
| 10.0E-6                                  |                        | 98.37    |
| <b>PHENYLBUTYRATE SODIUM</b>             |                        |          |
| 10.0E-9                                  |                        | 93.15    |
| 100.0E-9                                 |                        | 100.62   |
| 1.0E-6                                   |                        | 125.03   |
| 10.0E-6                                  |                        | 103.22   |
| <b>PHENYLEPHRINE HYDROCHLORIDE</b>       |                        |          |
| 10.0E-9                                  |                        | 125.49   |
| 100.0E-9                                 |                        | 105.59   |
| 1.0E-6                                   |                        | 86.93    |
| 10.0E-6                                  |                        | 110.83   |
| <b>PHENYLETHYL ALCOHOL</b>               |                        |          |
| 10.0E-9                                  |                        | 106.65   |
| 100.0E-9                                 |                        | 105.38   |
| 1.0E-6                                   |                        | 98.67    |
| 10.0E-6                                  |                        | 105.21   |
| <b>PHENYLMERCURIC ACETATE</b>            |                        |          |
| 10.0E-9                                  |                        | 119.66   |
| 100.0E-9                                 |                        | 62.00    |
| 1.0E-6                                   |                        | 1.88     |
| 10.0E-6                                  |                        | -0.01    |
| <b>PHENYLPROPANOLAMINE HYDROCHLORIDE</b> |                        |          |
| 10.0E-9                                  |                        | 118.50   |
| 100.0E-9                                 |                        | 108.13   |
| 1.0E-6                                   |                        | 114.81   |
| 10.0E-6                                  |                        | 127.52   |
| <b>PHENYTOIN SODIUM</b>                  |                        |          |
| 10.0E-9                                  |                        | 82.36    |
| 100.0E-9                                 |                        | 93.08    |
| 1.0E-6                                   |                        | 77.18    |
| 10.0E-6                                  |                        | 83.88    |
| <b>PHLORACETOPHENONE</b>                 |                        |          |
| 10.0E-9                                  |                        | 133.21   |
| 100.0E-9                                 |                        | 123.51   |
| 1.0E-6                                   |                        | 112.98   |
| 10.0E-6                                  |                        | 96.86    |
| <b>PHLORETIN</b>                         |                        |          |
| 10.0E-9                                  |                        | 102.20   |
| 100.0E-9                                 |                        | 99.40    |
| 1.0E-6                                   |                        | 93.52    |
| 10.0E-6                                  |                        | 89.62    |
| <b>PHLORIDZIN</b>                        |                        |          |
| 10.0E-9                                  |                        | 107.60   |
| 100.0E-9                                 |                        | 84.71    |
| 1.0E-6                                   |                        | 92.64    |
| 10.0E-6                                  |                        | 97.74    |
| <b>PHTHALYLSULFATHIAZOLE</b>             |                        |          |
| 10.0E-9                                  |                        | 103.98   |
| 100.0E-9                                 |                        | 107.48   |
| 1.0E-6                                   |                        | 102.16   |
| 10.0E-6                                  |                        | 108.40   |
| <b>PHYSCION</b>                          |                        |          |
| 10.0E-9                                  |                        | 112.03   |
| 100.0E-9                                 |                        | 120.39   |
| 1.0E-6                                   |                        | 108.96   |
| 10.0E-6                                  |                        | 113.40   |
| <b>PHYSOSTIGMINE SALICYLATE</b>          |                        |          |
| 10.0E-9                                  |                        | 113.97   |
| 100.0E-9                                 |                        | 112.34   |
| 1.0E-6                                   |                        | 106.73   |
| 10.0E-6                                  |                        | 121.96   |
| <b>PHYTOL</b>                            |                        |          |
| 10.0E-9                                  |                        | 104.13   |
| 100.0E-9                                 |                        | 113.70   |
| 1.0E-6                                   |                        | 113.35   |
| 10.0E-6                                  |                        | 100.95   |
| <b>PHYTONADIONE</b>                      |                        |          |
| 10.0E-9                                  |                        | 110.09   |
| 100.0E-9                                 |                        | 107.30   |
| 1.0E-6                                   |                        | 100.86   |
| 10.0E-6                                  |                        | 103.81   |

| Compounds and Final Concentrations (M) | Average of % Viability | Hits (✓) |
|----------------------------------------|------------------------|----------|
| <b>PICROPODOPHYLLIN</b>                |                        |          |
| 10.0E-9                                |                        | 111.97   |
| 100.0E-9                               |                        | 115.04   |
| 1.0E-6                                 |                        | 2.07     |
| 10.0E-6                                |                        | 1.72     |
| <b>PICROTIN</b>                        |                        |          |
| 10.0E-9                                |                        | 114.03   |
| 100.0E-9                               |                        | 142.36   |
| 1.0E-6                                 |                        | 128.26   |
| 10.0E-6                                |                        | 112.04   |
| <b>PICROTOXININ</b>                    |                        |          |
| 10.0E-9                                |                        | 119.69   |
| 100.0E-9                               |                        | 111.22   |
| 1.0E-6                                 |                        | 105.64   |
| 10.0E-6                                |                        | 118.07   |
| <b>PILOCARPINE NITRATE</b>             |                        |          |
| 10.0E-9                                |                        | 116.08   |
| 100.0E-9                               |                        | 112.26   |
| 1.0E-6                                 |                        | 119.98   |
| 10.0E-6                                |                        | 125.73   |
| <b>PIMETHIXENE MALEATE</b>             |                        |          |
| 10.0E-9                                |                        | 108.65   |
| 100.0E-9                               |                        | 114.09   |
| 1.0E-6                                 |                        | 122.31   |
| 10.0E-6                                |                        | 122.15   |
| <b>PIMOZIDE</b>                        |                        |          |
| 10.0E-9                                |                        | 102.20   |
| 100.0E-9                               |                        | 102.30   |
| 1.0E-6                                 |                        | 85.74    |
| 10.0E-6                                |                        | 37.65    |
| <b>PIMPINELLIN</b>                     |                        |          |
| 10.0E-9                                |                        | 110.43   |
| 100.0E-9                               |                        | 129.42   |
| 1.0E-6                                 |                        | 118.75   |
| 10.0E-6                                |                        | 120.54   |
| <b>PINACIDIL</b>                       |                        |          |
| 10.0E-9                                |                        | 112.96   |
| 100.0E-9                               |                        | 101.38   |
| 1.0E-6                                 |                        | 107.89   |
| 10.0E-6                                |                        | 100.47   |
| <b>PINDOLOL</b>                        |                        |          |
| 10.0E-9                                |                        | 111.05   |
| 100.0E-9                               |                        | 73.88    |
| 1.0E-6                                 |                        | 109.85   |
| 10.0E-6                                |                        | 1.49     |
| <b>PIOGLITAZONE HYDROCHLORIDE</b>      |                        |          |
| 10.0E-9                                |                        | 117.37   |
| 100.0E-9                               |                        | 116.03   |
| 1.0E-6                                 |                        | 99.52    |
| 10.0E-6                                |                        | 95.31    |
| <b>PIPAMPERONE</b>                     |                        |          |
| 10.0E-9                                |                        | 106.26   |
| 100.0E-9                               |                        | 106.71   |
| 1.0E-6                                 |                        | 96.49    |
| 10.0E-6                                |                        | 95.36    |
| <b>PIPEMIDIC ACID</b>                  |                        |          |
| 10.0E-9                                |                        | 90.48    |
| 100.0E-9                               |                        | 87.42    |
| 1.0E-6                                 |                        | 85.61    |
| 10.0E-6                                |                        | 82.38    |
| <b>PIPENZOLATE BROMIDE</b>             |                        |          |
| 10.0E-9                                |                        | 119.05   |
| 100.0E-9                               |                        | 121.12   |
| 1.0E-6                                 |                        | 116.19   |
| 10.0E-6                                |                        | 118.72   |
| <b>PIPERACILLIN SODIUM</b>             |                        |          |
| 10.0E-9                                |                        | 98.82    |
| 100.0E-9                               |                        | 76.35    |
| 1.0E-6                                 |                        | 109.89   |
| 10.0E-6                                |                        | 115.19   |
| <b>PIPERAZINE</b>                      |                        |          |
| 10.0E-9                                |                        | 121.13   |
| 100.0E-9                               |                        | 109.79   |
| 1.0E-6                                 |                        | 94.69    |
| 10.0E-6                                |                        | 103.98   |
| <b>PIPERIC ACID</b>                    |                        |          |
| 10.0E-9                                |                        | 117.51   |
| 100.0E-9                               |                        | 127.65   |
| 1.0E-6                                 |                        | 111.22   |
| 10.0E-6                                |                        | 118.71   |

| Compounds and Final Concentrations (M) | Average of % Viability | Hits (✓) |
|----------------------------------------|------------------------|----------|
| <b>PIPERIDOLATE HYDROCHLORIDE</b>      |                        |          |
| 10.0E-9                                |                        | 112.53   |
| 100.0E-9                               |                        | 113.71   |
| 1.0E-6                                 |                        | 118.01   |
| 10.0E-6                                |                        | 98.61    |
| <b>PIPERINE</b>                        |                        |          |
| 10.0E-9                                |                        | 118.87   |
| 100.0E-9                               |                        | 79.56    |
| 1.0E-6                                 |                        | 100.08   |
| 10.0E-6                                |                        | 105.15   |
| <b>PIPERONYLIC ACID</b>                |                        |          |
| 10.0E-9                                |                        | 127.55   |
| 100.0E-9                               |                        | 138.09   |
| 1.0E-6                                 |                        | 126.16   |
| 10.0E-6                                |                        | 117.37   |
| <b>PIPLARTINE</b>                      |                        |          |
| 10.0E-9                                |                        | 126.61   |
| 100.0E-9                               |                        | 116.88   |
| 1.0E-6                                 |                        | 27.41    |
| 10.0E-6                                |                        | 1.72     |
| <b>PIPOBROMAN</b>                      |                        |          |
| 10.0E-9                                |                        | 113.95   |
| 100.0E-9                               |                        | 109.65   |
| 1.0E-6                                 |                        | 105.15   |
| 10.0E-6                                |                        | 62.17    |
| <b>PIRACETAM</b>                       |                        |          |
| 10.0E-9                                |                        | 121.07   |
| 100.0E-9                               |                        | 102.95   |
| 1.0E-6                                 |                        | 122.78   |
| 10.0E-6                                |                        | 113.60   |
| <b>PIRENPERONE</b>                     |                        |          |
| 10.0E-9                                |                        | 107.39   |
| 100.0E-9                               |                        | 116.07   |
| 1.0E-6                                 |                        | 108.18   |
| 10.0E-6                                |                        | 110.44   |
| <b>PIRENZEPINE HYDROCHLORIDE</b>       |                        |          |
| 10.0E-9                                |                        | 98.28    |
| 100.0E-9                               |                        | 94.21    |
| 1.0E-6                                 |                        | 111.27   |
| 10.0E-6                                |                        | 94.10    |
| <b>PIRIBEDIL HYDROCHLORIDE</b>         |                        |          |
| 10.0E-9                                |                        | 106.82   |
| 100.0E-9                               |                        | 118.26   |
| 1.0E-6                                 |                        | 124.55   |
| 10.0E-6                                |                        | 107.96   |
| <b>PIROMIDIC ACID</b>                  |                        |          |
| 10.0E-9                                |                        | 109.63   |
| 100.0E-9                               |                        | 105.64   |
| 1.0E-6                                 |                        | 102.20   |
| 10.0E-6                                |                        | 105.25   |
| <b>PIROXICAM</b>                       |                        |          |
| 10.0E-9                                |                        | 115.95   |
| 100.0E-9                               |                        | 104.51   |
| 1.0E-6                                 |                        | 100.06   |
| 10.0E-6                                |                        | 110.01   |
| <b>PISCIDIC ACID</b>                   |                        |          |
| 10.0E-9                                |                        | 116.39   |
| 100.0E-9                               |                        | 107.87   |
| 1.0E-6                                 |                        | 103.25   |
| 10.0E-6                                |                        | 1.23     |
| <b>PIZOTYLIN MALATE</b>                |                        |          |
| 10.0E-9                                |                        | 125.79   |
| 100.0E-9                               |                        | 130.72   |
| 1.0E-6                                 |                        | 116.15   |
| 10.0E-6                                |                        | 115.76   |
| <b>PLUMBAGIN</b>                       |                        |          |
| 10.0E-9                                |                        | 131.61   |
| 100.0E-9                               |                        | 125.85   |
| 1.0E-6                                 |                        | 16.79    |
| 10.0E-6                                |                        | 0.12     |
| <b>PODOFILOX</b>                       |                        |          |
| 10.0E-9                                |                        | 109.15   |
| 100.0E-9                               |                        | 1.64     |
| 1.0E-6                                 |                        | 2.70     |
| 10.0E-6                                |                        | 2.42     |
| <b>PODOPHYLLIN ACETATE</b>             |                        |          |
| 10.0E-9                                |                        | 125.94   |
| 100.0E-9                               |                        | 2.28     |
| 1.0E-6                                 |                        | 3.99     |
| 10.0E-6                                |                        | 4.01     |

| Compounds and Final Concentrations (M) | Average of % Viability | Hits (✓) |
|----------------------------------------|------------------------|----------|
| <b>PODOTOTARIN</b>                     |                        |          |
| 10.0E-9                                |                        | 114.88   |
| 100.0E-9                               |                        | 126.31   |
| 1.0E-6                                 |                        | 115.44   |
| 10.0E-6                                |                        | 112.19   |
| <b>POLYMYXIN B SULFATE</b>             |                        |          |
| 10.0E-9                                |                        | 109.21   |
| 100.0E-9                               |                        | 117.02   |
| 1.0E-6                                 |                        | 107.27   |
| 10.0E-6                                |                        | 113.58   |
| <b>POMIFERIN</b>                       |                        |          |
| 10.0E-9                                |                        | 101.54   |
| 100.0E-9                               |                        | 101.55   |
| 1.0E-6                                 |                        | 96.96    |
| 10.0E-6                                |                        | 79.90    |
| <b>POTASSIUM p-AMINOBENZOATE</b>       |                        |          |
| 10.0E-9                                |                        | 108.35   |
| 100.0E-9                               |                        | 104.15   |
| 1.0E-6                                 |                        | 114.98   |
| 10.0E-6                                |                        | 104.81   |
| <b>PRALIDOXIME CHLORIDE</b>            |                        |          |
| 10.0E-9                                |                        | 122.80   |
| 100.0E-9                               |                        | 129.92   |
| 1.0E-6                                 |                        | 112.16   |
| 10.0E-6                                |                        | 112.57   |
| <b>PRAMOXINE HYDROCHLORIDE</b>         |                        |          |
| 10.0E-9                                |                        | 84.43    |
| 100.0E-9                               |                        | 83.34    |
| 1.0E-6                                 |                        | 90.12    |
| 10.0E-6                                |                        | 55.34    |
| <b>PRASTERONE</b>                      |                        |          |
| 10.0E-9                                |                        | 125.85   |
| 100.0E-9                               |                        | 115.01   |
| 1.0E-6                                 |                        | 128.42   |
| 10.0E-6                                |                        | 110.77   |
| <b>PRASTERONE ACETATE</b>              |                        |          |
| 10.0E-9                                |                        | 96.59    |
| 100.0E-9                               |                        | 101.10   |
| 1.0E-6                                 |                        | 106.69   |
| 10.0E-6                                |                        | 67.11    |
| <b>PRAVASTATIN SODIUM</b>              |                        |          |
| 10.0E-9                                |                        | 108.62   |
| 100.0E-9                               |                        | 110.54   |
| 1.0E-6                                 |                        | 108.32   |
| 10.0E-6                                |                        | 95.36    |
| <b>PRAZIQUANTEL</b>                    |                        |          |
| 10.0E-9                                |                        | 118.06   |
| 100.0E-9                               |                        | 97.27    |
| 1.0E-6                                 |                        | 99.11    |
| 10.0E-6                                |                        | 100.03   |
| <b>PRAZOSIN HYDROCHLORIDE</b>          |                        |          |
| 10.0E-9                                |                        | 139.23   |
| 100.0E-9                               |                        | 111.12   |
| 1.0E-6                                 |                        | 106.29   |
| 10.0E-6                                |                        | 54.65    |
| <b>PREDNISOLONE</b>                    |                        |          |
| 10.0E-9                                |                        | 127.07   |
| 100.0E-9                               |                        | 115.49   |
| 1.0E-6                                 |                        | 113.82   |
| 10.0E-6                                |                        | 116.84   |
| <b>PREDNISOLONE ACETATE</b>            |                        |          |
| 10.0E-9                                |                        | 128.51   |
| 100.0E-9                               |                        | 113.44   |
| 1.0E-6                                 |                        | 108.59   |
| 10.0E-6                                |                        | 109.56   |
| <b>PREDNISOLONE HEMISUCCINATE</b>      |                        |          |
| 10.0E-9                                |                        | 114.89   |
| 100.0E-9                               |                        | 127.79   |
| 1.0E-6                                 |                        | 114.75   |
| 10.0E-6                                |                        | 121.42   |
| <b>PREDNISOLONE SODIUM PHOSPHATE</b>   |                        |          |
| 10.0E-9                                |                        | 82.79    |
| 100.0E-9                               |                        | 90.59    |
| 1.0E-6                                 |                        | 93.35    |
| 10.0E-6                                |                        | 76.59    |
| <b>PREDNISON</b>                       |                        |          |
| 10.0E-9                                |                        | 133.45   |
| 100.0E-9                               |                        | 116.63   |
| 1.0E-6                                 |                        | 101.93   |
| 10.0E-6                                |                        | 109.50   |

| Compounds and Final Concentrations (M) | Average of % Viability | Hits (✓) |
|----------------------------------------|------------------------|----------|
| <b>PREGABALIN</b>                      |                        |          |
| 10.0E-9                                |                        | 102.40   |
| 100.0E-9                               |                        | 101.72   |
| 1.0E-6                                 |                        | 91.39    |
| 10.0E-6                                |                        | 88.71    |
| <b>PREGNENOLONE</b>                    |                        |          |
| 10.0E-9                                |                        | 121.68   |
| 100.0E-9                               |                        | 120.20   |
| 1.0E-6                                 |                        | 106.71   |
| 10.0E-6                                |                        | 124.72   |
| <b>PREGNENOLONE SUCCINATE</b>          |                        |          |
| 10.0E-9                                |                        | 73.59    |
| 100.0E-9                               |                        | 95.69    |
| 1.0E-6                                 |                        | 90.30    |
| 10.0E-6                                |                        | 90.95    |
| <b>PRENYLETIN</b>                      |                        |          |
| 10.0E-9                                |                        | 119.69   |
| 100.0E-9                               |                        | 124.50   |
| 1.0E-6                                 |                        | 114.24   |
| 10.0E-6                                |                        | 109.00   |
| <b>PRIDINOL METHANESULFONATE</b>       |                        |          |
| 10.0E-9                                |                        | 94.47    |
| 100.0E-9                               |                        | 101.45   |
| 1.0E-6                                 |                        | 108.88   |
| 10.0E-6                                |                        | 89.27    |
| <b>PRILOCAINE HYDROCHLORIDE</b>        |                        |          |
| 10.0E-9                                |                        | 108.93   |
| 100.0E-9                               |                        | 81.06    |
| 1.0E-6                                 |                        | 108.72   |
| 10.0E-6                                |                        | 114.37   |
| <b>PRIMAQUINE DIPHOSPHATE</b>          |                        |          |
| 10.0E-9                                |                        | 121.30   |
| 100.0E-9                               |                        | 86.78    |
| 1.0E-6                                 |                        | 103.86   |
| 10.0E-6                                |                        | 84.89    |
| <b>PRIMIDONE</b>                       |                        |          |
| 10.0E-9                                |                        | 113.94   |
| 100.0E-9                               |                        | 77.02    |
| 1.0E-6                                 |                        | 106.75   |
| 10.0E-6                                |                        | 104.65   |
| <b>PRIMULETIN</b>                      |                        |          |
| 10.0E-9                                |                        | 103.40   |
| 100.0E-9                               |                        | 104.94   |
| 1.0E-6                                 |                        | 110.69   |
| 10.0E-6                                |                        | 89.68    |
| <b>PRISTIMERIN</b>                     |                        |          |
| 10.0E-9                                |                        | 128.80   |
| 100.0E-9                               |                        | 113.75   |
| 1.0E-6                                 |                        | 52.03    |
| 10.0E-6                                |                        | 0.00     |
| <b>PROADIFEN HYDROCHLORIDE</b>         |                        |          |
| 10.0E-9                                |                        | 103.21   |
| 100.0E-9                               |                        | 117.93   |
| 1.0E-6                                 |                        | 107.42   |
| 10.0E-6                                |                        | 108.18   |
| <b>PROBENECID</b>                      |                        |          |
| 10.0E-9                                |                        | 126.06   |
| 100.0E-9                               |                        | 108.86   |
| 1.0E-6                                 |                        | 92.93    |
| 10.0E-6                                |                        | 99.32    |
| <b>PROBUCOL</b>                        |                        |          |
| 10.0E-9                                |                        | 96.81    |
| 100.0E-9                               |                        | 101.56   |
| 1.0E-6                                 |                        | 95.21    |
| 10.0E-6                                |                        | 94.36    |
| <b>PROCAINAMIDE HYDROCHLORIDE</b>      |                        |          |
| 10.0E-9                                |                        | 113.38   |
| 100.0E-9                               |                        | 103.73   |
| 1.0E-6                                 |                        | 70.96    |
| 10.0E-6                                |                        | 1.97     |
| <b>PROCAINE HYDROCHLORIDE</b>          |                        |          |
| 10.0E-9                                |                        | 141.58   |
| 100.0E-9                               |                        | 109.44   |
| 1.0E-6                                 |                        | 108.69   |
| 10.0E-6                                |                        | 103.63   |
| <b>PROCHLORPERAZINE EDISYLATE</b>      |                        |          |
| 10.0E-9                                |                        | 141.80   |
| 100.0E-9                               |                        | 110.38   |
| 1.0E-6                                 |                        | 94.76    |
| 10.0E-6                                |                        | 79.08    |

| Compounds and Final Concentrations (M) | Average of % Viability                                                                | Hits (✓) |
|----------------------------------------|---------------------------------------------------------------------------------------|----------|
| <b>PROCYCLIDINE HYDROCHLORIDE</b>      |                                                                                       |          |
| 10.0E-9                                |    | 137.70   |
| 100.0E-9                               |    | 110.45   |
| 1.0E-6                                 |    | 90.47    |
| 10.0E-6                                |    | 90.99    |
| <b>PROGESTERONE</b>                    |                                                                                       |          |
| 10.0E-9                                |    | 121.10   |
| 100.0E-9                               |    | 112.82   |
| 1.0E-6                                 |    | 111.83   |
| 10.0E-6                                |    | 78.94    |
| <b>PROGLUMIDE</b>                      |                                                                                       |          |
| 10.0E-9                                |    | 97.20    |
| 100.0E-9                               |    | 100.44   |
| 1.0E-6                                 |    | 86.55    |
| 10.0E-6                                |    | 92.92    |
| <b>PROMAZINE HYDROCHLORIDE</b>         |                                                                                       |          |
| 10.0E-9                                |    | 139.92   |
| 100.0E-9                               |    | 116.56   |
| 1.0E-6                                 |    | 113.50   |
| 10.0E-6                                |    | 112.22   |
| <b>PROMETHAZINE HYDROCHLORIDE</b>      |                                                                                       |          |
| 10.0E-9                                |    | 104.60   |
| 100.0E-9                               |    | 108.43   |
| 1.0E-6                                 |    | 111.23   |
| 10.0E-6                                |    | 73.93    |
| <b>PRONETALOL HYDROCHLORIDE</b>        |                                                                                       |          |
| 10.0E-9                                |    | 127.71   |
| 100.0E-9                               |    | 130.57   |
| 1.0E-6                                 |    | 110.04   |
| 10.0E-6                                |    | 127.00   |
| <b>PROPAFENONE HYDROCHLORIDE</b>       |                                                                                       |          |
| 10.0E-9                                |    | 117.97   |
| 100.0E-9                               |    | 112.22   |
| 1.0E-6                                 |    | 110.65   |
| 10.0E-6                                |    | 109.86   |
| <b>PROPANTHELINE BROMIDE</b>           |                                                                                       |          |
| 10.0E-9                                |   | 125.57   |
| 100.0E-9                               |  | 95.29    |
| 1.0E-6                                 |  | 85.44    |
| 10.0E-6                                |  | 108.05   |
| <b>PROPENTOFYLLINE</b>                 |                                                                                       |          |
| 10.0E-9                                |  | 130.13   |
| 100.0E-9                               |  | 114.52   |
| 1.0E-6                                 |  | 120.27   |
| 10.0E-6                                |  | 114.80   |
| <b>PROPOFOL</b>                        |                                                                                       |          |
| 10.0E-9                                |  | 103.10   |
| 100.0E-9                               |  | 110.31   |
| 1.0E-6                                 |  | 100.79   |
| 10.0E-6                                |  | 103.96   |
| <b>PROPRANOLOL HYDROCHLORIDE (+/-)</b> |                                                                                       |          |
| 10.0E-9                                |  | 60.90    |
| 100.0E-9                               |  | 101.42   |
| 1.0E-6                                 |  | 94.87    |
| 10.0E-6                                |  | 89.73    |
| <b>PROPYLTHIOURACIL</b>                |                                                                                       |          |
| 10.0E-9                                |  | 133.32   |
| 100.0E-9                               |  | 79.69    |
| 1.0E-6                                 |  | 121.07   |
| 10.0E-6                                |  | 107.02   |
| <b>PROTIONAMIDE</b>                    |                                                                                       |          |
| 10.0E-9                                |  | 116.40   |
| 100.0E-9                               |  | 119.53   |
| 1.0E-6                                 |  | 126.39   |
| 10.0E-6                                |  | 117.08   |
| <b>PROTOPORPHYRIN IX</b>               |                                                                                       |          |
| 10.0E-9                                |  | 118.94   |
| 100.0E-9                               |  | 106.73   |
| 1.0E-6                                 |  | 111.04   |
| 10.0E-6                                |  | 53.14    |
| <b>PROTOVERATRINE A</b>                |                                                                                       |          |
| 10.0E-9                                |  | 118.46   |
| 100.0E-9                               |  | 122.62   |
| 1.0E-6                                 |  | 119.76   |
| 10.0E-6                                |  | 109.34   |
| <b>PROTOVERATRINE B</b>                |                                                                                       |          |
| 10.0E-9                                |  | 105.82   |
| 100.0E-9                               |  | 126.65   |
| 1.0E-6                                 |  | 118.73   |
| 10.0E-6                                |  | 119.08   |

| Compounds and Final Concentrations (M) | Average of % Viability | Hits (✓) |
|----------------------------------------|------------------------|----------|
| <b>PROTRYPYLINE HYDROCHLORIDE</b>      |                        |          |
| 10.0E-9                                |                        | 130.54   |
| 100.0E-9                               |                        | 119.56   |
| 1.0E-6                                 |                        | 106.61   |
| 10.0E-6                                |                        | 105.18   |
| <b>PROXYPHYLLINE</b>                   |                        |          |
| 10.0E-9                                |                        | 108.15   |
| 100.0E-9                               |                        | 106.93   |
| 1.0E-6                                 |                        | 126.58   |
| 10.0E-6                                |                        | 100.46   |
| <b>PSEUDO-ANISATIN</b>                 |                        |          |
| 10.0E-9                                |                        | 119.50   |
| 100.0E-9                               |                        | 128.57   |
| 1.0E-6                                 |                        | 110.34   |
| 10.0E-6                                |                        | 113.94   |
| <b>PSEUDOEPHEDRINE HYDROCHLORIDE</b>   |                        |          |
| 10.0E-9                                |                        | 123.05   |
| 100.0E-9                               |                        | 76.58    |
| 1.0E-6                                 |                        | 104.65   |
| 10.0E-6                                |                        | 119.82   |
| <b>PTAEROXYLIN</b>                     |                        |          |
| 10.0E-9                                |                        | 107.49   |
| 100.0E-9                               |                        | 124.07   |
| 1.0E-6                                 |                        | 108.32   |
| 10.0E-6                                |                        | 92.65    |
| <b>PUERARIN</b>                        |                        |          |
| 10.0E-9                                |                        | 115.28   |
| 100.0E-9                               |                        | 117.85   |
| 1.0E-6                                 |                        | 126.63   |
| 10.0E-6                                |                        | 119.74   |
| <b>PUNCTAPORONIN B</b>                 |                        |          |
| 10.0E-9                                |                        | 82.46    |
| 100.0E-9                               |                        | 84.45    |
| 1.0E-6                                 |                        | 80.10    |
| 10.0E-6                                |                        | 86.30    |
| <b>PUROMYCIN HYDROCHLORIDE</b>         |                        |          |
| 10.0E-9                                |                        | 81.88    |
| 100.0E-9                               |                        | 40.84    |
| 1.0E-6                                 |                        | 0.69     |
| 10.0E-6                                |                        | 0.00     |
| <b>PURPURIN</b>                        |                        |          |
| 10.0E-9                                |                        | 115.65   |
| 100.0E-9                               |                        | 97.33    |
| 1.0E-6                                 |                        | 102.12   |
| 10.0E-6                                |                        | 94.15    |
| <b>PURPUROGALLIN</b>                   |                        |          |
| 10.0E-9                                |                        | 122.08   |
| 100.0E-9                               |                        | 134.73   |
| 1.0E-6                                 |                        | 119.54   |
| 10.0E-6                                |                        | 30.10    |
| <b>PURPUROGALLIN-4-CARBOXYLIC ACID</b> |                        |          |
| 10.0E-9                                |                        | 133.46   |
| 100.0E-9                               |                        | 113.75   |
| 1.0E-6                                 |                        | 119.89   |
| 10.0E-6                                |                        | 64.03    |
| <b>PYRANTEL PAMOATE</b>                |                        |          |
| 10.0E-9                                |                        | 117.25   |
| 100.0E-9                               |                        | 100.77   |
| 1.0E-6                                 |                        | 89.41    |
| 10.0E-6                                |                        | 92.08    |
| <b>PYRAZINAMIDE</b>                    |                        |          |
| 10.0E-9                                |                        | 110.34   |
| 100.0E-9                               |                        | 101.05   |
| 1.0E-6                                 |                        | 89.23    |
| 10.0E-6                                |                        | 104.47   |
| <b>PYRIDOSTIGMINE BROMIDE</b>          |                        |          |
| 10.0E-9                                |                        | 99.62    |
| 100.0E-9                               |                        | 110.46   |
| 1.0E-6                                 |                        | 90.50    |
| 10.0E-6                                |                        | 102.97   |
| <b>PYRIDOXINE</b>                      |                        |          |
| 10.0E-9                                |                        | 118.73   |
| 100.0E-9                               |                        | 115.03   |
| 1.0E-6                                 |                        | 112.35   |
| 10.0E-6                                |                        | 111.32   |
| <b>PYRILAMINE MALEATE</b>              |                        |          |
| 10.0E-9                                |                        | 132.49   |
| 100.0E-9                               |                        | 99.20    |
| 1.0E-6                                 |                        | 93.25    |
| 10.0E-6                                |                        | 90.68    |

| Compounds and Final Concentrations (M) | Average of % Viability | Hits (✓) |
|----------------------------------------|------------------------|----------|
| <b>PYRIMETHAMINE</b>                   |                        |          |
| 10.0E-9                                |                        | 138.13   |
| 100.0E-9                               |                        | 103.93   |
| 1.0E-6                                 |                        | 99.71    |
| 10.0E-6                                |                        | 96.78    |
| <b>PYRITHIONE ZINC</b>                 |                        |          |
| 10.0E-9                                |                        | 97.43    |
| 100.0E-9                               |                        | 41.48    |
| 1.0E-6                                 |                        | 0.05     |
| 10.0E-6                                |                        | 0.08     |
| <b>PYRITHYLDIONE</b>                   |                        |          |
| 10.0E-9                                |                        | 116.80   |
| 100.0E-9                               |                        | 105.45   |
| 1.0E-6                                 |                        | 121.56   |
| 10.0E-6                                |                        | 115.54   |
| <b>PYRITINOL</b>                       |                        |          |
| 10.0E-9                                |                        | 132.31   |
| 100.0E-9                               |                        | 111.68   |
| 1.0E-6                                 |                        | 118.15   |
| 10.0E-6                                |                        | 113.43   |
| <b>PYROCATECHUIC ACID</b>              |                        |          |
| 10.0E-9                                |                        | 120.74   |
| 100.0E-9                               |                        | 116.02   |
| 1.0E-6                                 |                        | 111.47   |
| 10.0E-6                                |                        | 102.70   |
| <b>PYROGALLIN</b>                      |                        |          |
| 10.0E-9                                |                        | 118.50   |
| 100.0E-9                               |                        | 116.30   |
| 1.0E-6                                 |                        | 92.56    |
| 10.0E-6                                |                        | 50.19    |
| <b>PYROMYCIN</b>                       |                        |          |
| 10.0E-9                                |                        | 125.05   |
| 100.0E-9                               |                        | 122.50   |
| 1.0E-6                                 |                        | 129.70   |
| 10.0E-6                                |                        | 3.62     |
| <b>PYRVINIUM PAMOATE</b>               |                        |          |
| 10.0E-9                                |                        | 131.04   |
| 100.0E-9                               |                        | 114.64   |
| 1.0E-6                                 |                        | 4.24     |
| 10.0E-6                                |                        | 0.84     |
| <b>QUASSIN</b>                         |                        |          |
| 10.0E-9                                |                        | 118.93   |
| 100.0E-9                               |                        | 145.24   |
| 1.0E-6                                 |                        | 114.89   |
| 10.0E-6                                |                        | 2.00     |
| <b>QUEBRACHITOL</b>                    |                        |          |
| 10.0E-9                                |                        | 118.36   |
| 100.0E-9                               |                        | 119.51   |
| 1.0E-6                                 |                        | 113.15   |
| 10.0E-6                                |                        | 124.16   |
| <b>QUERCETIN</b>                       |                        |          |
| 10.0E-9                                |                        | 122.68   |
| 100.0E-9                               |                        | 124.84   |
| 1.0E-6                                 |                        | 97.34    |
| 10.0E-6                                |                        | 43.44    |
| <b>QUERCITRIN</b>                      |                        |          |
| 10.0E-9                                |                        | 105.70   |
| 100.0E-9                               |                        | 96.64    |
| 1.0E-6                                 |                        | 87.50    |
| 10.0E-6                                |                        | 82.13    |
| <b>QUETIAPINE</b>                      |                        |          |
| 10.0E-9                                |                        | 127.94   |
| 100.0E-9                               |                        | 108.81   |
| 1.0E-6                                 |                        | 109.68   |
| 10.0E-6                                |                        | 88.87    |
| <b>QUINACRINE HYDROCHLORIDE</b>        |                        |          |
| 10.0E-9                                |                        | 134.65   |
| 100.0E-9                               |                        | 117.23   |
| 1.0E-6                                 |                        | 92.61    |
| 10.0E-6                                |                        | -0.01    |
| <b>QUINAPRIL HYDROCHLORIDE</b>         |                        |          |
| 10.0E-9                                |                        | 122.61   |
| 100.0E-9                               |                        | 119.50   |
| 1.0E-6                                 |                        | 115.04   |
| 10.0E-6                                |                        | 106.22   |
| <b>QUINIC ACID</b>                     |                        |          |
| 10.0E-9                                |                        | 116.33   |
| 100.0E-9                               |                        | 123.67   |
| 1.0E-6                                 |                        | 117.69   |
| 10.0E-6                                |                        | 119.97   |



| Compounds and Final Concentrations (M) | Average of % Viability | Hits (✓) |
|----------------------------------------|------------------------|----------|
| <b>QUINIDINE GLUCONATE</b>             |                        |          |
| 10.0E-9                                |                        | 119.04   |
| 100.0E-9                               |                        | 106.64   |
| 1.0E-6                                 |                        | 105.67   |
| 10.0E-6                                |                        | 112.27   |
| <b>QUININE ETHYL CARBONATE</b>         |                        |          |
| 10.0E-9                                |                        | 118.54   |
| 100.0E-9                               |                        | 106.35   |
| 1.0E-6                                 |                        | 105.77   |
| 10.0E-6                                |                        | 102.19   |
| <b>QUININE SULFATE</b>                 |                        |          |
| 10.0E-9                                |                        | 115.38   |
| 100.0E-9                               |                        | 98.58    |
| 1.0E-6                                 |                        | 110.32   |
| 10.0E-6                                |                        | 109.44   |
| <b>QUINOLINIC ACID</b>                 |                        |          |
| 10.0E-9                                |                        | 131.60   |
| 100.0E-9                               |                        | 129.12   |
| 1.0E-6                                 |                        | 111.75   |
| 10.0E-6                                |                        | 116.88   |
| <b>QUIPAZINE MALEATE</b>               |                        |          |
| 10.0E-9                                |                        | 105.37   |
| 100.0E-9                               |                        | 95.66    |
| 1.0E-6                                 |                        | 110.98   |
| 10.0E-6                                |                        | 94.96    |
| <b>RABEPRAZOLE SODIUM</b>              |                        |          |
| 10.0E-9                                |                        | 120.42   |
| 100.0E-9                               |                        | 122.42   |
| 1.0E-6                                 |                        | 115.34   |
| 10.0E-6                                |                        | 105.97   |
| <b>RACEPHEDRINE HYDROCHLORIDE</b>      |                        |          |
| 10.0E-9                                |                        | 126.11   |
| 100.0E-9                               |                        | 100.40   |
| 1.0E-6                                 |                        | 113.40   |
| 10.0E-6                                |                        | 103.66   |
| <b>RALOXIFENE HYDROCHLORIDE</b>        |                        |          |
| 10.0E-9                                |                        | 136.28   |
| 100.0E-9                               |                        | 125.10   |
| 1.0E-6                                 |                        | 116.48   |
| 10.0E-6                                |                        | 95.18    |
| <b>RAMIFENAZONE</b>                    |                        |          |
| 10.0E-9                                |                        | 118.23   |
| 100.0E-9                               |                        | 122.33   |
| 1.0E-6                                 |                        | 121.62   |
| 10.0E-6                                |                        | 124.61   |
| <b>RAMIPRIL</b>                        |                        |          |
| 10.0E-9                                |                        | 80.68    |
| 100.0E-9                               |                        | 66.55    |
| 1.0E-6                                 |                        | 80.24    |
| 10.0E-6                                |                        | 56.50    |
| <b>RANITIDINE</b>                      |                        |          |
| 10.0E-9                                |                        | 111.76   |
| 100.0E-9                               |                        | 99.58    |
| 1.0E-6                                 |                        | 121.14   |
| 10.0E-6                                |                        | 107.16   |
| <b>RANOLAZINE</b>                      |                        |          |
| 10.0E-9                                |                        | 118.27   |
| 100.0E-9                               |                        | 106.09   |
| 1.0E-6                                 |                        | 92.41    |
| 10.0E-6                                |                        | 99.22    |
| <b>RAUWOLSCINE HYDROCHLORIDE</b>       |                        |          |
| 10.0E-9                                |                        | 116.69   |
| 100.0E-9                               |                        | 108.23   |
| 1.0E-6                                 |                        | 103.17   |
| 10.0E-6                                |                        | 107.97   |
| <b>REBAMIPIDE</b>                      |                        |          |
| 10.0E-9                                |                        | 124.20   |
| 100.0E-9                               |                        | 121.74   |
| 1.0E-6                                 |                        | 121.41   |
| 10.0E-6                                |                        | 119.93   |
| <b>RESERPINE</b>                       |                        |          |
| 10.0E-9                                |                        | 103.52   |
| 100.0E-9                               |                        | 76.49    |
| 1.0E-6                                 |                        | 102.54   |
| 10.0E-6                                |                        | 90.00    |
| <b>RESORCINOL</b>                      |                        |          |
| 10.0E-9                                |                        | 101.88   |
| 100.0E-9                               |                        | 100.06   |
| 1.0E-6                                 |                        | 89.24    |
| 10.0E-6                                |                        | 94.62    |

| Compounds and Final Concentrations (M) | Average of % Viability | Hits (✓) |
|----------------------------------------|------------------------|----------|
| <b>RESORCINOL MONOACETATE</b>          |                        |          |
| 10.0E-9                                |                        | 103.77   |
| 100.0E-9                               |                        | 97.98    |
| 1.0E-6                                 |                        | 116.89   |
| 10.0E-6                                |                        | 112.54   |
| <b>RESVERATROL</b>                     |                        |          |
| 10.0E-9                                |                        | 126.15   |
| 100.0E-9                               |                        | 124.16   |
| 1.0E-6                                 |                        | 110.28   |
| 10.0E-6                                |                        | 118.11   |
| <b>RESVERATROL 4'-METHYL ETHER</b>     |                        |          |
| 10.0E-9                                |                        | 85.68    |
| 100.0E-9                               |                        | 81.41    |
| 1.0E-6                                 |                        | 75.75    |
| 10.0E-6                                |                        | 61.22    |
| <b>RETINOL</b>                         |                        |          |
| 10.0E-9                                |                        | 101.67   |
| 100.0E-9                               |                        | 98.01    |
| 1.0E-6                                 |                        | 101.42   |
| 10.0E-6                                |                        | 76.75    |
| <b>RETINYL ACETATE</b>                 |                        |          |
| 10.0E-9                                |                        | 87.62    |
| 100.0E-9                               |                        | 95.93    |
| 1.0E-6                                 |                        | 90.99    |
| 10.0E-6                                |                        | 52.43    |
| <b>RETINYL PALMITATE</b>               |                        |          |
| 10.0E-9                                |                        | 115.21   |
| 100.0E-9                               |                        | 104.11   |
| 1.0E-6                                 |                        | 108.43   |
| 10.0E-6                                |                        | 97.44    |
| <b>RETUSIN</b>                         |                        |          |
| 10.0E-9                                |                        | 148.53   |
| 100.0E-9                               |                        | 157.95   |
| 1.0E-6                                 |                        | 128.58   |
| 10.0E-6                                |                        | 132.71   |
| <b>RETUSIN 7-METHYL ETHER</b>          |                        |          |
| 10.0E-9                                |                        | 126.24   |
| 100.0E-9                               |                        | 117.74   |
| 1.0E-6                                 |                        | 118.19   |
| 10.0E-6                                |                        | 121.75   |
| <b>RHETSININE</b>                      |                        |          |
| 10.0E-9                                |                        | 115.76   |
| 100.0E-9                               |                        | 119.94   |
| 1.0E-6                                 |                        | 112.87   |
| 10.0E-6                                |                        | 96.15    |
| <b>RHIZOCARPIC ACID</b>                |                        |          |
| 10.0E-9                                |                        | 117.08   |
| 100.0E-9                               |                        | 108.82   |
| 1.0E-6                                 |                        | 97.53    |
| 10.0E-6                                |                        | 94.29    |
| <b>RHODINYL ACETATE</b>                |                        |          |
| 10.0E-9                                |                        | 110.83   |
| 100.0E-9                               |                        | 127.54   |
| 1.0E-6                                 |                        | 111.13   |
| 10.0E-6                                |                        | 122.01   |
| <b>RHODOCLADONIC ACID</b>              |                        |          |
| 10.0E-9                                |                        | 104.04   |
| 100.0E-9                               |                        | 102.50   |
| 1.0E-6                                 |                        | 37.22    |
| 10.0E-6                                |                        | 101.19   |
| <b>RHOIFOLIN</b>                       |                        |          |
| 10.0E-9                                |                        | 96.84    |
| 100.0E-9                               |                        | 100.36   |
| 1.0E-6                                 |                        | 93.10    |
| 10.0E-6                                |                        | 93.13    |
| <b>RIBAVIRIN</b>                       |                        |          |
| 10.0E-9                                |                        | 104.96   |
| 100.0E-9                               |                        | 105.88   |
| 1.0E-6                                 |                        | 101.09   |
| 10.0E-6                                |                        | 94.60    |
| <b>RIBOFLAVIN</b>                      |                        |          |
| 10.0E-9                                |                        | 111.60   |
| 100.0E-9                               |                        | 101.37   |
| 1.0E-6                                 |                        | 103.88   |
| 10.0E-6                                |                        | 102.60   |
| <b>RIBOFLAVIN 5-PHOSPHATE SODIUM</b>   |                        |          |
| 10.0E-9                                |                        | 108.69   |
| 100.0E-9                               |                        | 115.12   |
| 1.0E-6                                 |                        | 115.46   |
| 10.0E-6                                |                        | 113.14   |

| Compounds and Final Concentrations (M) | Average of % Viability | Hits (✓) |
|----------------------------------------|------------------------|----------|
| <b>RIFAMPIN</b>                        |                        |          |
| 10.0E-9                                |                        | 119.96   |
| 100.0E-9                               |                        | 95.91    |
| 1.0E-6                                 |                        | 97.84    |
| 10.0E-6                                |                        | 88.37    |
| <b>RIFAXIMIN</b>                       |                        |          |
| 10.0E-9                                |                        | 108.45   |
| 100.0E-9                               |                        | 113.03   |
| 1.0E-6                                 |                        | 123.59   |
| 10.0E-6                                |                        | 88.55    |
| <b>RIMANTADINE HYDROCHLORIDE</b>       |                        |          |
| 10.0E-9                                |                        | 105.17   |
| 100.0E-9                               |                        | 108.42   |
| 1.0E-6                                 |                        | 107.55   |
| 10.0E-6                                |                        | 110.22   |
| <b>RISEDRONATE SODIUM HYDRATE</b>      |                        |          |
| 10.0E-9                                |                        | 106.96   |
| 100.0E-9                               |                        | 108.94   |
| 1.0E-6                                 |                        | 111.10   |
| 10.0E-6                                |                        | 110.06   |
| <b>RITANSERIN</b>                      |                        |          |
| 10.0E-9                                |                        | 109.03   |
| 100.0E-9                               |                        | 89.84    |
| 1.0E-6                                 |                        | 110.09   |
| 10.0E-6                                |                        | 99.13    |
| <b>RITODRINE HYDROCHLORIDE</b>         |                        |          |
| 10.0E-9                                |                        | 88.41    |
| 100.0E-9                               |                        | 82.29    |
| 1.0E-6                                 |                        | 99.34    |
| 10.0E-6                                |                        | 100.50   |
| <b>RIZATRIPTAN BENZOATE</b>            |                        |          |
| 10.0E-9                                |                        | 123.02   |
| 100.0E-9                               |                        | 106.90   |
| 1.0E-6                                 |                        | 115.35   |
| 10.0E-6                                |                        | 116.89   |
| <b>ROBUSTIC ACID</b>                   |                        |          |
| 10.0E-9                                |                        | 119.71   |
| 100.0E-9                               |                        | 130.30   |
| 1.0E-6                                 |                        | 112.69   |
| 10.0E-6                                |                        | 122.80   |
| <b>ROCCELIC ACID</b>                   |                        |          |
| 10.0E-9                                |                        | 120.90   |
| 100.0E-9                               |                        | 138.99   |
| 1.0E-6                                 |                        | 131.23   |
| 10.0E-6                                |                        | 124.62   |
| <b>ROFECOXIB</b>                       |                        |          |
| 10.0E-9                                |                        | 110.40   |
| 100.0E-9                               |                        | 110.36   |
| 1.0E-6                                 |                        | 100.97   |
| 10.0E-6                                |                        | 112.38   |
| <b>ROLIPRAM</b>                        |                        |          |
| 10.0E-9                                |                        | 98.29    |
| 100.0E-9                               |                        | 100.62   |
| 1.0E-6                                 |                        | 103.71   |
| 10.0E-6                                |                        | 86.90    |
| <b>ROLITETRACYCLINE</b>                |                        |          |
| 10.0E-9                                |                        | 114.12   |
| 100.0E-9                               |                        | 98.06    |
| 1.0E-6                                 |                        | 102.57   |
| 10.0E-6                                |                        | 90.73    |
| <b>RONIDAZOLE</b>                      |                        |          |
| 10.0E-9                                |                        | 102.64   |
| 100.0E-9                               |                        | 108.12   |
| 1.0E-6                                 |                        | 117.53   |
| 10.0E-6                                |                        | 98.28    |
| <b>ROPINIROLE</b>                      |                        |          |
| 10.0E-9                                |                        | 126.58   |
| 100.0E-9                               |                        | 118.25   |
| 1.0E-6                                 |                        | 106.83   |
| 10.0E-6                                |                        | 121.37   |
| <b>ROSIGLITAZONE</b>                   |                        |          |
| 10.0E-9                                |                        | 112.29   |
| 100.0E-9                               |                        | 111.43   |
| 1.0E-6                                 |                        | 112.72   |
| 10.0E-6                                |                        | 107.98   |
| <b>ROSMARINIC ACID</b>                 |                        |          |
| 10.0E-9                                |                        | 91.14    |
| 100.0E-9                               |                        | 96.73    |
| 1.0E-6                                 |                        | 88.54    |
| 10.0E-6                                |                        | 57.34    |

| Compounds and Final Concentrations (M) | Average of % Viability | Hits (✓) |
|----------------------------------------|------------------------|----------|
| <b>ROSOLIC ACID</b>                    |                        |          |
| 10.0E-9                                |                        | 112.87   |
| 100.0E-9                               |                        | 100.92   |
| 1.0E-6                                 |                        | 103.54   |
| 10.0E-6                                |                        | 22.06    |
| <b>ROSUVASTATIN CALCIUM</b>            |                        |          |
| 10.0E-9                                |                        | 117.66   |
| 100.0E-9                               |                        | 123.59   |
| 1.0E-6                                 |                        | 106.72   |
| 10.0E-6                                |                        | 92.17    |
| <b>ROTENONE</b>                        |                        |          |
| 10.0E-9                                |                        | 101.31   |
| 100.0E-9                               |                        | 89.54    |
| 1.0E-6                                 |                        | 4.54     |
| 10.0E-6                                |                        | 1.61     |
| <b>ROXARSONE</b>                       |                        |          |
| 10.0E-9                                |                        | 105.13   |
| 100.0E-9                               |                        | 108.79   |
| 1.0E-6                                 |                        | 87.94    |
| 10.0E-6                                |                        | 96.72    |
| <b>ROXITHROMYCIN</b>                   |                        |          |
| 10.0E-9                                |                        | 89.27    |
| 100.0E-9                               |                        | 85.31    |
| 1.0E-6                                 |                        | 95.08    |
| 10.0E-6                                |                        | 95.65    |
| <b>RUTILANTINONE</b>                   |                        |          |
| 10.0E-9                                |                        | 93.85    |
| 100.0E-9                               |                        | 100.19   |
| 1.0E-6                                 |                        | 101.47   |
| 10.0E-6                                |                        | 87.15    |
| <b>RUTOSIDE (rutin)</b>                |                        |          |
| 10.0E-9                                |                        | 76.12    |
| 100.0E-9                               |                        | 88.65    |
| 1.0E-6                                 |                        | 79.54    |
| 10.0E-6                                |                        | 67.12    |
| <b>SACCHARIN</b>                       |                        |          |
| 10.0E-9                                |                        | 117.30   |
| 100.0E-9                               |                        | 111.07   |
| 1.0E-6                                 |                        | 114.02   |
| 10.0E-6                                |                        | 116.92   |
| <b>SAFROLE</b>                         |                        |          |
| 10.0E-9                                |                        | 116.48   |
| 100.0E-9                               |                        | 102.80   |
| 1.0E-6                                 |                        | 99.49    |
| 10.0E-6                                |                        | 111.36   |
| <b>SALICIN</b>                         |                        |          |
| 10.0E-9                                |                        | 117.42   |
| 100.0E-9                               |                        | 101.33   |
| 1.0E-6                                 |                        | 3.24     |
| 10.0E-6                                |                        | 1.39     |
| <b>SALICYL ALCOHOL</b>                 |                        |          |
| 10.0E-9                                |                        | 122.18   |
| 100.0E-9                               |                        | 102.29   |
| 1.0E-6                                 |                        | 89.75    |
| 10.0E-6                                |                        | 89.24    |
| <b>SALICYLAMIDE</b>                    |                        |          |
| 10.0E-9                                |                        | 108.13   |
| 100.0E-9                               |                        | 100.86   |
| 1.0E-6                                 |                        | 95.85    |
| 10.0E-6                                |                        | 83.28    |
| <b>SALICYLANILIDE</b>                  |                        |          |
| 10.0E-9                                |                        | 106.24   |
| 100.0E-9                               |                        | 117.33   |
| 1.0E-6                                 |                        | 104.42   |
| 10.0E-6                                |                        | 111.28   |
| <b>SALIDROSIDE</b>                     |                        |          |
| 10.0E-9                                |                        | 144.14   |
| 100.0E-9                               |                        | 122.53   |
| 1.0E-6                                 |                        | 99.93    |
| 10.0E-6                                |                        | 97.70    |
| <b>SALINOMYCIN, SODIUM</b>             |                        |          |
| 10.0E-9                                |                        | 96.97    |
| 100.0E-9                               |                        | 107.50   |
| 1.0E-6                                 |                        | 84.83    |
| 10.0E-6                                |                        | 5.34     |
| <b>SALSALATE</b>                       |                        |          |
| 10.0E-9                                |                        | 114.26   |
| 100.0E-9                               |                        | 115.39   |
| 1.0E-6                                 |                        | 114.58   |
| 10.0E-6                                |                        | 109.08   |

| Compounds and Final Concentrations (M) | Average of % Viability | Hits (✓) |
|----------------------------------------|------------------------|----------|
| <b>SALSOLIDINE</b>                     |                        |          |
| 10.0E-9                                |                        | 108.90   |
| 100.0E-9                               |                        | 94.99    |
| 1.0E-6                                 |                        | 97.46    |
| 10.0E-6                                |                        | 91.32    |
| <b>SALSOLINE</b>                       |                        |          |
| 10.0E-9                                |                        | 97.28    |
| 100.0E-9                               |                        | 95.00    |
| 1.0E-6                                 |                        | 96.67    |
| 10.0E-6                                |                        | 99.58    |
| <b>SALSOLINOL HYDROBROMIDE</b>         |                        |          |
| 10.0E-9                                |                        | 128.40   |
| 100.0E-9                               |                        | 116.51   |
| 1.0E-6                                 |                        | 103.73   |
| 10.0E-6                                |                        | 3.35     |
| <b>SALVINORIN A</b>                    |                        |          |
| 10.0E-9                                |                        | 114.10   |
| 100.0E-9                               |                        | 123.72   |
| 1.0E-6                                 |                        | 120.96   |
| 10.0E-6                                |                        | 103.50   |
| <b>SANGUINARINE SULFATE</b>            |                        |          |
| 10.0E-9                                |                        | 97.99    |
| 100.0E-9                               |                        | 103.39   |
| 1.0E-6                                 |                        | 86.97    |
| 10.0E-6                                |                        | 0.17     |
| <b>SANTONIN</b>                        |                        |          |
| 10.0E-9                                |                        | 105.74   |
| 100.0E-9                               |                        | 97.32    |
| 1.0E-6                                 |                        | 86.36    |
| 10.0E-6                                |                        | 76.00    |
| <b>SAPPANONE A DIMETHYL ETHER</b>      |                        |          |
| 10.0E-9                                |                        | 114.60   |
| 100.0E-9                               |                        | 142.72   |
| 1.0E-6                                 |                        | 109.81   |
| 10.0E-6                                |                        | 17.98    |
| <b>SARAFLOXACIN HYDROCHLORIDE</b>      |                        |          |
| 10.0E-9                                |                        | 103.04   |
| 100.0E-9                               |                        | 96.28    |
| 1.0E-6                                 |                        | 82.35    |
| 10.0E-6                                |                        | 26.45    |
| <b>SARMENTOSIDE B</b>                  |                        |          |
| 10.0E-9                                |                        | 129.32   |
| 100.0E-9                               |                        | 111.40   |
| 1.0E-6                                 |                        | 118.73   |
| 10.0E-6                                |                        | 85.62    |
| <b>SCOPOLAMINE HYDROBROMIDE</b>        |                        |          |
| 10.0E-9                                |                        | 101.82   |
| 100.0E-9                               |                        | 104.93   |
| 1.0E-6                                 |                        | 106.64   |
| 10.0E-6                                |                        | 103.65   |
| <b>SCOPOLETIN</b>                      |                        |          |
| 10.0E-9                                |                        | 128.84   |
| 100.0E-9                               |                        | 129.04   |
| 1.0E-6                                 |                        | 127.33   |
| 10.0E-6                                |                        | 117.09   |
| <b>SECNIDAZOLE</b>                     |                        |          |
| 10.0E-9                                |                        | 116.61   |
| 100.0E-9                               |                        | 105.47   |
| 1.0E-6                                 |                        | 125.53   |
| 10.0E-6                                |                        | 115.63   |
| <b>SECURININE</b>                      |                        |          |
| 10.0E-9                                |                        | 112.09   |
| 100.0E-9                               |                        | 107.11   |
| 1.0E-6                                 |                        | 77.56    |
| 10.0E-6                                |                        | 1.38     |
| <b>SELAMECTIN</b>                      |                        |          |
| 10.0E-9                                |                        | 111.68   |
| 100.0E-9                               |                        | 107.86   |
| 1.0E-6                                 |                        | 102.51   |
| 10.0E-6                                |                        | 0.35     |
| <b>SELEGILINE HYDROCHLORIDE</b>        |                        |          |
| 10.0E-9                                |                        | 119.84   |
| 100.0E-9                               |                        | 118.56   |
| 1.0E-6                                 |                        | 120.44   |
| 10.0E-6                                |                        | 109.23   |
| <b>SEMUSTINE</b>                       |                        |          |
| 10.0E-9                                |                        | 118.81   |
| 100.0E-9                               |                        | 94.75    |
| 1.0E-6                                 |                        | 95.37    |
| 10.0E-6                                |                        | 83.26    |

| Compounds and Final Concentrations (M) | Average of % Viability | Hits (✓) |
|----------------------------------------|------------------------|----------|
| <b>SENNOSIDE A</b>                     |                        |          |
| 10.0E-9                                |                        | 107.98   |
| 100.0E-9                               |                        | 112.42   |
| 1.0E-6                                 |                        | 114.81   |
| 10.0E-6                                |                        | 108.19   |
| <b>SEROTONIN HYDROCHLORIDE</b>         |                        |          |
| 10.0E-9                                |                        | 107.25   |
| 100.0E-9                               |                        | 101.21   |
| 1.0E-6                                 |                        | 103.92   |
| 10.0E-6                                |                        | 96.08    |
| <b>SERTRALINE HYDROCHLORIDE</b>        |                        |          |
| 10.0E-9                                |                        | 115.03   |
| 100.0E-9                               |                        | 103.03   |
| 1.0E-6                                 |                        | 102.81   |
| 10.0E-6                                |                        | 89.55    |
| <b>SHIKIMIC ACID</b>                   |                        |          |
| 10.0E-9                                |                        | 116.55   |
| 100.0E-9                               |                        | 147.42   |
| 1.0E-6                                 |                        | 115.70   |
| 10.0E-6                                |                        | 110.57   |
| <b>SIBUTRAMINE HYDROCHLORIDE</b>       |                        |          |
| 10.0E-9                                |                        | 121.79   |
| 100.0E-9                               |                        | 115.18   |
| 1.0E-6                                 |                        | 109.64   |
| 10.0E-6                                |                        | 100.48   |
| <b>SILDENAFIL CITRATE</b>              |                        |          |
| 10.0E-9                                |                        | 123.97   |
| 100.0E-9                               |                        | 112.85   |
| 1.0E-6                                 |                        | 104.76   |
| 10.0E-6                                |                        | 108.59   |
| <b>SILIBININ</b>                       |                        |          |
| 10.0E-9                                |                        | 121.00   |
| 100.0E-9                               |                        | 110.24   |
| 1.0E-6                                 |                        | 100.67   |
| 10.0E-6                                |                        | 87.06    |
| <b>SIMVASTATIN</b>                     |                        |          |
| 10.0E-9                                |                        | 112.40   |
| 100.0E-9                               |                        | 114.04   |
| 1.0E-6                                 |                        | 94.02    |
| 10.0E-6                                |                        | 80.32    |
| <b>SINENSETIN</b>                      |                        |          |
| 10.0E-9                                |                        | 112.06   |
| 100.0E-9                               |                        | 101.01   |
| 1.0E-6                                 |                        | 102.31   |
| 10.0E-6                                |                        | 101.58   |
| <b>SINOMENINE</b>                      |                        |          |
| 10.0E-9                                |                        | 115.54   |
| 100.0E-9                               |                        | 106.57   |
| 1.0E-6                                 |                        | 108.11   |
| 10.0E-6                                |                        | 98.97    |
| <b>SIROLIMUS</b>                       |                        |          |
| 10.0E-9                                |                        | 53.04    |
| 100.0E-9                               |                        | 38.69    |
| 1.0E-6                                 |                        | 41.99    |
| 10.0E-6                                |                        | 24.05    |
| <b>S-ISOCORYDINE (+)</b>               |                        |          |
| 10.0E-9                                |                        | 117.45   |
| 100.0E-9                               |                        | 129.41   |
| 1.0E-6                                 |                        | 130.22   |
| 10.0E-6                                |                        | 141.48   |
| <b>SISOMICIN SULFATE</b>               |                        |          |
| 10.0E-9                                |                        | 123.77   |
| 100.0E-9                               |                        | 100.55   |
| 1.0E-6                                 |                        | 104.43   |
| 10.0E-6                                |                        | 105.68   |
| <b>SITOSTERYL ACETATE</b>              |                        |          |
| 10.0E-9                                |                        | 110.35   |
| 100.0E-9                               |                        | 113.19   |
| 1.0E-6                                 |                        | 115.72   |
| 10.0E-6                                |                        | 110.68   |
| <b>SKATOLE</b>                         |                        |          |
| 10.0E-9                                |                        | 109.71   |
| 100.0E-9                               |                        | 103.36   |
| 1.0E-6                                 |                        | 95.96    |
| 10.0E-6                                |                        | 29.33    |
| <b>SMILAGENIN</b>                      |                        |          |
| 10.0E-9                                |                        | 114.06   |
| 100.0E-9                               |                        | 122.12   |
| 1.0E-6                                 |                        | 113.69   |
| 10.0E-6                                |                        | 93.82    |

| Compounds and Final Concentrations (M) | Average of % Viability | Hits (✓) |
|----------------------------------------|------------------------|----------|
| <b>SMILAGENIN ACETATE</b>              |                        |          |
| 10.0E-9                                |                        | 128.40   |
| 100.0E-9                               |                        | 138.54   |
| 1.0E-6                                 |                        | 115.23   |
| 10.0E-6                                |                        | 111.40   |
| <b>SODIUM DEHYDROCHOLATE</b>           |                        |          |
| 10.0E-9                                |                        | 108.59   |
| 100.0E-9                               |                        | 105.49   |
| 1.0E-6                                 |                        | 92.17    |
| 10.0E-6                                |                        | 103.86   |
| <b>SODIUM DEOXYCHOLATE</b>             |                        |          |
| 10.0E-9                                |                        | 102.48   |
| 100.0E-9                               |                        | 95.31    |
| 1.0E-6                                 |                        | 104.77   |
| 10.0E-6                                |                        | 86.85    |
| <b>SODIUM FLUOROACETATE</b>            |                        |          |
| 10.0E-9                                |                        | 130.54   |
| 100.0E-9                               |                        | 120.83   |
| 1.0E-6                                 |                        | 107.60   |
| 10.0E-6                                |                        | 108.74   |
| <b>SODIUM NITROPRUSSIDE</b>            |                        |          |
| 10.0E-9                                |                        | 113.62   |
| 100.0E-9                               |                        | 111.77   |
| 1.0E-6                                 |                        | 119.00   |
| 10.0E-6                                |                        | 103.59   |
| <b>SODIUM OXYBATE</b>                  |                        |          |
| 10.0E-9                                |                        | 120.44   |
| 100.0E-9                               |                        | 116.80   |
| 1.0E-6                                 |                        | 120.76   |
| 10.0E-6                                |                        | 97.83    |
| <b>SODIUM PHENYLACETATE</b>            |                        |          |
| 10.0E-9                                |                        | 108.78   |
| 100.0E-9                               |                        | 103.69   |
| 1.0E-6                                 |                        | 101.58   |
| 10.0E-6                                |                        | 70.52    |
| <b>SODIUM SALICYLATE</b>               |                        |          |
| 10.0E-9                                |                        | 120.16   |
| 100.0E-9                               |                        | 106.16   |
| 1.0E-6                                 |                        | 95.34    |
| 10.0E-6                                |                        | 107.25   |
| <b>SODIUM TETRADECYL SULFATE</b>       |                        |          |
| 10.0E-9                                |                        | 125.55   |
| 100.0E-9                               |                        | 108.84   |
| 1.0E-6                                 |                        | 2.14     |
| 10.0E-6                                |                        | 2.26     |
| <b>SODIUM THIOGLYCOLATE</b>            |                        |          |
| 10.0E-9                                |                        | 94.24    |
| 100.0E-9                               |                        | 102.31   |
| 1.0E-6                                 |                        | 102.91   |
| 10.0E-6                                |                        | 103.93   |
| <b>SOLANESOL</b>                       |                        |          |
| 10.0E-9                                |                        | 116.64   |
| 100.0E-9                               |                        | 112.35   |
| 1.0E-6                                 |                        | 121.45   |
| 10.0E-6                                |                        | 115.52   |
| <b>SOLANESYL ACETATE</b>               |                        |          |
| 10.0E-9                                |                        | 92.07    |
| 100.0E-9                               |                        | 50.86    |
| 1.0E-6                                 |                        | 96.38    |
| 10.0E-6                                |                        | 51.12    |
| <b>SOLASODINE</b>                      |                        |          |
| 10.0E-9                                |                        | 113.98   |
| 100.0E-9                               |                        | 123.42   |
| 1.0E-6                                 |                        | 129.68   |
| 10.0E-6                                |                        | 116.24   |
| <b>SOLIDAGENONE</b>                    |                        |          |
| 10.0E-9                                |                        | 151.33   |
| 100.0E-9                               |                        | 138.76   |
| 1.0E-6                                 |                        | 118.87   |
| 10.0E-6                                |                        | 85.31    |
| <b>SOLIFENACIN SUCCINATE</b>           |                        |          |
| 10.0E-9                                |                        | 95.77    |
| 100.0E-9                               |                        | 102.55   |
| 1.0E-6                                 |                        | 93.73    |
| 10.0E-6                                |                        | 89.77    |
| <b>SORBITOL</b>                        |                        |          |
| 10.0E-9                                |                        | 118.88   |
| 100.0E-9                               |                        | 120.85   |
| 1.0E-6                                 |                        | 114.21   |
| 10.0E-6                                |                        | 118.25   |

| Compounds and Final Concentrations (M)       | Average of % Viability | Hits (✓) |
|----------------------------------------------|------------------------|----------|
| <b>SOTALOL HYDROCHLORIDE</b>                 |                        |          |
| 10.0E-9                                      |                        | 131.12   |
| 100.0E-9                                     |                        | 125.92   |
| 1.0E-6                                       |                        | 107.17   |
| 10.0E-6                                      |                        | 116.99   |
| <b>SPARTEINE SULFATE</b>                     |                        |          |
| 10.0E-9                                      |                        | 77.34    |
| 100.0E-9                                     |                        | 89.31    |
| 1.0E-6                                       |                        | 77.34    |
| 10.0E-6                                      |                        | 69.35    |
| <b>SPECTINOMYCIN HYDROCHLORIDE</b>           |                        |          |
| 10.0E-9                                      |                        | 118.93   |
| 100.0E-9                                     |                        | 94.45    |
| 1.0E-6                                       |                        | 100.81   |
| 10.0E-6                                      |                        | 110.30   |
| <b>SPERMINE</b>                              |                        |          |
| 10.0E-9                                      |                        | 145.15   |
| 100.0E-9                                     |                        | 140.86   |
| 1.0E-6                                       |                        | 129.10   |
| 10.0E-6                                      |                        | 129.02   |
| <b>SPHONDIN</b>                              |                        |          |
| 10.0E-9                                      |                        | 130.02   |
| 100.0E-9                                     |                        | 125.74   |
| 1.0E-6                                       |                        | 129.22   |
| 10.0E-6                                      |                        | 121.34   |
| <b>SPIPERONE</b>                             |                        |          |
| 10.0E-9                                      |                        | 95.86    |
| 100.0E-9                                     |                        | 109.52   |
| 1.0E-6                                       |                        | 101.14   |
| 10.0E-6                                      |                        | 109.96   |
| <b>SPIRAMYCIN</b>                            |                        |          |
| 10.0E-9                                      |                        | 90.38    |
| 100.0E-9                                     |                        | 112.13   |
| 1.0E-6                                       |                        | 98.42    |
| 10.0E-6                                      |                        | 106.29   |
| <b>SPIRONOLACTONE</b>                        |                        |          |
| 10.0E-9                                      |                        | 120.79   |
| 100.0E-9                                     |                        | 84.50    |
| 1.0E-6                                       |                        | 100.52   |
| 10.0E-6                                      |                        | 103.82   |
| <b>SR-2640</b>                               |                        |          |
| 10.0E-9                                      |                        | 123.38   |
| 100.0E-9                                     |                        | 105.99   |
| 1.0E-6                                       |                        | 118.93   |
| 10.0E-6                                      |                        | 103.76   |
| <b>STICTIC ACID</b>                          |                        |          |
| 10.0E-9                                      |                        | 129.92   |
| 100.0E-9                                     |                        | 115.47   |
| 1.0E-6                                       |                        | 105.03   |
| 10.0E-6                                      |                        | 105.84   |
| <b>STIGMASTA-4,22-DIEN-3-ONE</b>             |                        |          |
| 10.0E-9                                      |                        | 110.42   |
| 100.0E-9                                     |                        | 103.61   |
| 1.0E-6                                       |                        | 118.43   |
| 10.0E-6                                      |                        | 98.68    |
| <b>STIGMASTEROL</b>                          |                        |          |
| 10.0E-9                                      |                        | 124.07   |
| 100.0E-9                                     |                        | 129.30   |
| 1.0E-6                                       |                        | 110.80   |
| 10.0E-6                                      |                        | 104.64   |
| <b>STREPTOMYCIN SULFATE</b>                  |                        |          |
| 10.0E-9                                      |                        | 116.93   |
| 100.0E-9                                     |                        | 62.92    |
| 1.0E-6                                       |                        | 97.57    |
| 10.0E-6                                      |                        | 103.99   |
| <b>STREPTOZOSIN</b>                          |                        |          |
| 10.0E-9                                      |                        | 112.31   |
| 100.0E-9                                     |                        | 108.52   |
| 1.0E-6                                       |                        | 96.58    |
| 10.0E-6                                      |                        | 91.86    |
| <b>STROPHANTHIDIN</b>                        |                        |          |
| 10.0E-9                                      |                        | 118.69   |
| 100.0E-9                                     |                        | 104.33   |
| 1.0E-6                                       |                        | 1.92     |
| 10.0E-6                                      |                        | 2.40     |
| <b>STROPHANTHIDINIC ACID LACTONE ACETATE</b> |                        |          |
| 10.0E-9                                      |                        | 110.17   |
| 100.0E-9                                     |                        | 102.65   |
| 1.0E-6                                       |                        | 65.48    |
| 10.0E-6                                      |                        | 1.76     |



| Compounds and Final Concentrations (M)     | Average of % Viability | Hits (✓) |
|--------------------------------------------|------------------------|----------|
| <b>STRYCHNINE</b>                          |                        |          |
| 10.0E-9                                    |                        | 133.73   |
| 100.0E-9                                   |                        | 99.79    |
| 1.0E-6                                     |                        | 87.63    |
| 10.0E-6                                    |                        | 101.54   |
| <b>STRYCHNINE METHIODIDE</b>               |                        |          |
| 10.0E-9                                    |                        | 107.09   |
| 100.0E-9                                   |                        | 116.51   |
| 1.0E-6                                     |                        | 120.43   |
| 10.0E-6                                    |                        | 121.08   |
| <b>SUCCINYL SULFATHIAZOLE</b>              |                        |          |
| 10.0E-9                                    |                        | 113.51   |
| 100.0E-9                                   |                        | 111.44   |
| 1.0E-6                                     |                        | 100.92   |
| 10.0E-6                                    |                        | 105.26   |
| <b>SUCRALFATE SODIUM (10% w/v in DMSO)</b> |                        |          |
| 10.0E-9                                    |                        | 95.26    |
| 100.0E-9                                   |                        | 105.87   |
| 1.0E-6                                     |                        | 113.60   |
| 10.0E-6                                    |                        | 110.86   |
| <b>SUCRALOSE</b>                           |                        |          |
| 10.0E-9                                    |                        | 110.74   |
| 100.0E-9                                   |                        | 110.86   |
| 1.0E-6                                     |                        | 106.96   |
| 10.0E-6                                    |                        | 67.35    |
| <b>SULCONAZOLE NITRATE</b>                 |                        |          |
| 10.0E-9                                    |                        | 88.37    |
| 100.0E-9                                   |                        | 84.51    |
| 1.0E-6                                     |                        | 86.66    |
| 10.0E-6                                    |                        | 2.66     |
| <b>SULFABENZAMIDE</b>                      |                        |          |
| 10.0E-9                                    |                        | 115.25   |
| 100.0E-9                                   |                        | 96.89    |
| 1.0E-6                                     |                        | 105.96   |
| 10.0E-6                                    |                        | 103.39   |
| <b>SULFACETAMIDE</b>                       |                        |          |
| 10.0E-9                                    |                        | 105.34   |
| 100.0E-9                                   |                        | 100.24   |
| 1.0E-6                                     |                        | 108.11   |
| 10.0E-6                                    |                        | 104.32   |
| <b>SULFACHLORPYRIDAZINE</b>                |                        |          |
| 10.0E-9                                    |                        | 78.32    |
| 100.0E-9                                   |                        | 84.23    |
| 1.0E-6                                     |                        | 97.03    |
| 10.0E-6                                    |                        | 105.38   |
| <b>SULFADIAZINE</b>                        |                        |          |
| 10.0E-9                                    |                        | 109.04   |
| 100.0E-9                                   |                        | 97.02    |
| 1.0E-6                                     |                        | 91.97    |
| 10.0E-6                                    |                        | 101.10   |
| <b>SULFADIMETHOXINE</b>                    |                        |          |
| 10.0E-9                                    |                        | 88.66    |
| 100.0E-9                                   |                        | 84.97    |
| 1.0E-6                                     |                        | 94.15    |
| 10.0E-6                                    |                        | 99.70    |
| <b>SULFADOXINE</b>                         |                        |          |
| 10.0E-9                                    |                        | 91.22    |
| 100.0E-9                                   |                        | 90.36    |
| 1.0E-6                                     |                        | 84.77    |
| 10.0E-6                                    |                        | 88.11    |
| <b>SULFAMERAZINE</b>                       |                        |          |
| 10.0E-9                                    |                        | 122.87   |
| 100.0E-9                                   |                        | 110.11   |
| 1.0E-6                                     |                        | 102.79   |
| 10.0E-6                                    |                        | 104.07   |
| <b>SULFAMETER</b>                          |                        |          |
| 10.0E-9                                    |                        | 109.20   |
| 100.0E-9                                   |                        | 111.61   |
| 1.0E-6                                     |                        | 116.98   |
| 10.0E-6                                    |                        | 111.91   |
| <b>SULFAMETHAZINE</b>                      |                        |          |
| 10.0E-9                                    |                        | 110.94   |
| 100.0E-9                                   |                        | 116.23   |
| 1.0E-6                                     |                        | 103.34   |
| 10.0E-6                                    |                        | 112.30   |
| <b>SULFAMETHIZOLE</b>                      |                        |          |
| 10.0E-9                                    |                        | 107.09   |
| 100.0E-9                                   |                        | 106.88   |
| 1.0E-6                                     |                        | 93.25    |
| 10.0E-6                                    |                        | 113.08   |

| Compounds and Final Concentrations (M) | Average of % Viability | Hits (✓) |
|----------------------------------------|------------------------|----------|
| <b>SULFAMETHOXAZOLE</b>                |                        |          |
| 10.0E-9                                |                        | 119.27   |
| 100.0E-9                               |                        | 94.71    |
| 1.0E-6                                 |                        | 98.31    |
| 10.0E-6                                |                        | 110.61   |
| <b>SULFAMETHOXYPYRIDAZINE</b>          |                        |          |
| 10.0E-9                                |                        | 97.65    |
| 100.0E-9                               |                        | 113.74   |
| 1.0E-6                                 |                        | 107.17   |
| 10.0E-6                                |                        | 99.79    |
| <b>SULFAMONOMETHOXINE</b>              |                        |          |
| 10.0E-9                                |                        | 95.98    |
| 100.0E-9                               |                        | 96.64    |
| 1.0E-6                                 |                        | 117.28   |
| 10.0E-6                                |                        | 102.73   |
| <b>SULFANILATE ZINC</b>                |                        |          |
| 10.0E-9                                |                        | 98.80    |
| 100.0E-9                               |                        | 106.19   |
| 1.0E-6                                 |                        | 105.15   |
| 10.0E-6                                |                        | 105.84   |
| <b>SULFANITRAN</b>                     |                        |          |
| 10.0E-9                                |                        | 103.66   |
| 100.0E-9                               |                        | 109.18   |
| 1.0E-6                                 |                        | 107.53   |
| 10.0E-6                                |                        | 100.10   |
| <b>SULFAPHENAZOLE</b>                  |                        |          |
| 10.0E-9                                |                        | 130.77   |
| 100.0E-9                               |                        | 126.95   |
| 1.0E-6                                 |                        | 113.37   |
| 10.0E-6                                |                        | 124.78   |
| <b>SULFAPYRIDINE</b>                   |                        |          |
| 10.0E-9                                |                        | 119.98   |
| 100.0E-9                               |                        | 95.25    |
| 1.0E-6                                 |                        | 109.31   |
| 10.0E-6                                |                        | 117.67   |
| <b>SULFAQUINOXALINE SODIUM</b>         |                        |          |
| 10.0E-9                                |                        | 94.91    |
| 100.0E-9                               |                        | 99.18    |
| 1.0E-6                                 |                        | 95.66    |
| 10.0E-6                                |                        | 93.74    |
| <b>SULFASALAZINE</b>                   |                        |          |
| 10.0E-9                                |                        | 126.23   |
| 100.0E-9                               |                        | 70.60    |
| 1.0E-6                                 |                        | 109.10   |
| 10.0E-6                                |                        | 107.87   |
| <b>SULFATHIAZOLE</b>                   |                        |          |
| 10.0E-9                                |                        | 99.28    |
| 100.0E-9                               |                        | 95.30    |
| 1.0E-6                                 |                        | 85.37    |
| 10.0E-6                                |                        | 84.67    |
| <b>SULFINPYRAZONE</b>                  |                        |          |
| 10.0E-9                                |                        | 111.25   |
| 100.0E-9                               |                        | 90.86    |
| 1.0E-6                                 |                        | 82.56    |
| 10.0E-6                                |                        | 91.27    |
| <b>SULFISOXAZOLE</b>                   |                        |          |
| 10.0E-9                                |                        | 113.77   |
| 100.0E-9                               |                        | 93.94    |
| 1.0E-6                                 |                        | 89.83    |
| 10.0E-6                                |                        | 91.33    |
| <b>SULFISOXAZOLE ACETYL</b>            |                        |          |
| 10.0E-9                                |                        | 95.43    |
| 100.0E-9                               |                        | 96.98    |
| 1.0E-6                                 |                        | 83.24    |
| 10.0E-6                                |                        | 93.07    |
| <b>SULINDAC</b>                        |                        |          |
| 10.0E-9                                |                        | 108.38   |
| 100.0E-9                               |                        | 91.80    |
| 1.0E-6                                 |                        | 27.40    |
| 10.0E-6                                |                        | 2.21     |
| <b>SULMAZOLE</b>                       |                        |          |
| 10.0E-9                                |                        | 104.27   |
| 100.0E-9                               |                        | 108.90   |
| 1.0E-6                                 |                        | 123.09   |
| 10.0E-6                                |                        | 121.09   |
| <b>SULOCTIDIL</b>                      |                        |          |
| 10.0E-9                                |                        | 113.27   |
| 100.0E-9                               |                        | 101.58   |
| 1.0E-6                                 |                        | 118.19   |
| 10.0E-6                                |                        | 40.10    |

| Compounds and Final Concentrations (M) | Average of % Viability | Hits (✓) |
|----------------------------------------|------------------------|----------|
| <b>SULPIRIDE</b>                       |                        |          |
| 10.0E-9                                |                        | 94.10    |
| 100.0E-9                               |                        | 102.38   |
| 1.0E-6                                 |                        | 117.34   |
| 10.0E-6                                |                        | 100.97   |
| <b>SUPROFEN</b>                        |                        |          |
| 10.0E-9                                |                        | 107.87   |
| 100.0E-9                               |                        | 117.26   |
| 1.0E-6                                 |                        | 107.39   |
| 10.0E-6                                |                        | 112.62   |
| <b>SURAMIN</b>                         |                        |          |
| 10.0E-9                                |                        | 92.39    |
| 100.0E-9                               |                        | 100.06   |
| 1.0E-6                                 |                        | 106.50   |
| 10.0E-6                                |                        | 96.67    |
| <b>SUXIBUZONE</b>                      |                        |          |
| 10.0E-9                                |                        | 119.61   |
| 100.0E-9                               |                        | 121.05   |
| 1.0E-6                                 |                        | 121.05   |
| 10.0E-6                                |                        | 112.16   |
| <b>SYRINGIC ACID</b>                   |                        |          |
| 10.0E-9                                |                        | 108.23   |
| 100.0E-9                               |                        | 96.07    |
| 1.0E-6                                 |                        | 104.65   |
| 10.0E-6                                |                        | 97.08    |
| <b>TACRINE HYDROCHLORIDE</b>           |                        |          |
| 10.0E-9                                |                        | 108.85   |
| 100.0E-9                               |                        | 103.22   |
| 1.0E-6                                 |                        | 102.33   |
| 10.0E-6                                |                        | 104.54   |
| <b>TACROLIMUS</b>                      |                        |          |
| 10.0E-9                                |                        | 91.02    |
| 100.0E-9                               |                        | 81.50    |
| 1.0E-6                                 |                        | 88.29    |
| 10.0E-6                                |                        | 46.43    |
| <b>TADALAFIL</b>                       |                        |          |
| 10.0E-9                                |                        | 109.90   |
| 100.0E-9                               |                        | 105.60   |
| 1.0E-6                                 |                        | 115.70   |
| 10.0E-6                                |                        | 106.00   |
| <b>TAMOXIFEN CITRATE</b>               |                        |          |
| 10.0E-9                                |                        | 127.43   |
| 100.0E-9                               |                        | 94.94    |
| 1.0E-6                                 |                        | 74.25    |
| 10.0E-6                                |                        | 80.50    |
| <b>TANGERITIN</b>                      |                        |          |
| 10.0E-9                                |                        | 122.33   |
| 100.0E-9                               |                        | 107.44   |
| 1.0E-6                                 |                        | 123.37   |
| 10.0E-6                                |                        | 104.11   |
| <b>TANNIC ACID</b>                     |                        |          |
| 10.0E-9                                |                        | 97.20    |
| 100.0E-9                               |                        | 102.05   |
| 1.0E-6                                 |                        | 83.81    |
| 10.0E-6                                |                        | 3.51     |
| <b>TANSHINONE IIA</b>                  |                        |          |
| 10.0E-9                                |                        | 121.84   |
| 100.0E-9                               |                        | 134.42   |
| 1.0E-6                                 |                        | 102.19   |
| 10.0E-6                                |                        | 92.46    |
| <b>TANSHINONE IIA SULFONATE SODIUM</b> |                        |          |
| 10.0E-9                                |                        | 101.80   |
| 100.0E-9                               |                        | 92.66    |
| 1.0E-6                                 |                        | 102.97   |
| 10.0E-6                                |                        | 96.50    |
| <b>TAPENTADOL HYDROCHLORIDE</b>        |                        |          |
| 10.0E-9                                |                        | 116.84   |
| 100.0E-9                               |                        | 118.84   |
| 1.0E-6                                 |                        | 127.43   |
| 10.0E-6                                |                        | 109.32   |
| <b>TARTARIC ACID</b>                   |                        |          |
| 10.0E-9                                |                        | 122.92   |
| 100.0E-9                               |                        | 117.51   |
| 1.0E-6                                 |                        | 115.84   |
| 10.0E-6                                |                        | 118.96   |
| <b>TAURINE</b>                         |                        |          |
| 10.0E-9                                |                        | 115.51   |
| 100.0E-9                               |                        | 105.83   |
| 1.0E-6                                 |                        | 107.53   |
| 10.0E-6                                |                        | 116.50   |

| Compounds and Final Concentrations (M) | Average of % Viability | Hits (✓) |
|----------------------------------------|------------------------|----------|
| <b>TEICOPLANIN [A(2-1) shown]</b>      |                        |          |
| 10.0E-9                                |                        | 98.29    |
| 100.0E-9                               |                        | 93.22    |
| 1.0E-6                                 |                        | 104.36   |
| 10.0E-6                                |                        | 111.15   |
| <b>TELENZEPINE HYDROCHLORIDE</b>       |                        |          |
| 10.0E-9                                |                        | 126.58   |
| 100.0E-9                               |                        | 133.53   |
| 1.0E-6                                 |                        | 111.92   |
| 10.0E-6                                |                        | 113.57   |
| <b>TELITHROMYCIN</b>                   |                        |          |
| 10.0E-9                                |                        | 126.16   |
| 100.0E-9                               |                        | 118.70   |
| 1.0E-6                                 |                        | 108.40   |
| 10.0E-6                                |                        | 107.48   |
| <b>TEMEFOS</b>                         |                        |          |
| 10.0E-9                                |                        | 102.74   |
| 100.0E-9                               |                        | 114.06   |
| 1.0E-6                                 |                        | 124.51   |
| 10.0E-6                                |                        | 103.86   |
| <b>TENIPOSIDE</b>                      |                        |          |
| 10.0E-9                                |                        | 98.10    |
| 100.0E-9                               |                        | 6.47     |
| 1.0E-6                                 |                        | 1.90     |
| 10.0E-6                                |                        | 0.99     |
| <b>TENOXCAM</b>                        |                        |          |
| 10.0E-9                                |                        | 124.55   |
| 100.0E-9                               |                        | 106.76   |
| 1.0E-6                                 |                        | 96.33    |
| 10.0E-6                                |                        | 35.13    |
| <b>TERAZOSIN HYDROCHLORIDE</b>         |                        |          |
| 10.0E-9                                |                        | 121.39   |
| 100.0E-9                               |                        | 104.37   |
| 1.0E-6                                 |                        | 99.89    |
| 10.0E-6                                |                        | 93.98    |
| <b>TERBINAFINE HYDROCHLORIDE</b>       |                        |          |
| 10.0E-9                                |                        | 106.56   |
| 100.0E-9                               |                        | 101.61   |
| 1.0E-6                                 |                        | 108.85   |
| 10.0E-6                                |                        | 106.29   |
| <b>TERBUTALINE HEMISULFATE</b>         |                        |          |
| 10.0E-9                                |                        | 114.57   |
| 100.0E-9                               |                        | 103.31   |
| 1.0E-6                                 |                        | 100.17   |
| 10.0E-6                                |                        | 104.82   |
| <b>TERFENADINE</b>                     |                        |          |
| 10.0E-9                                |                        | 118.10   |
| 100.0E-9                               |                        | 105.06   |
| 1.0E-6                                 |                        | 105.16   |
| 10.0E-6                                |                        | 89.08    |
| <b>TESTOSTERONE</b>                    |                        |          |
| 10.0E-9                                |                        | 101.73   |
| 100.0E-9                               |                        | 94.27    |
| 1.0E-6                                 |                        | 104.82   |
| 10.0E-6                                |                        | 91.98    |
| <b>TESTOSTERONE PROPIONATE</b>         |                        |          |
| 10.0E-9                                |                        | 78.82    |
| 100.0E-9                               |                        | 87.16    |
| 1.0E-6                                 |                        | 79.33    |
| 10.0E-6                                |                        | 70.08    |
| <b>TETRACAINE HYDROCHLORIDE</b>        |                        |          |
| 10.0E-9                                |                        | 114.34   |
| 100.0E-9                               |                        | 98.49    |
| 1.0E-6                                 |                        | 96.60    |
| 10.0E-6                                |                        | 96.12    |
| <b>TETRACHLOROISOPHTHALONITRILE</b>    |                        |          |
| 10.0E-9                                |                        | 97.22    |
| 100.0E-9                               |                        | 4.71     |
| 1.0E-6                                 |                        | 5.67     |
| 10.0E-6                                |                        | 0.75     |
| <b>TETRACYCLINE HYDROCHLORIDE</b>      |                        |          |
| 10.0E-9                                |                        | 118.35   |
| 100.0E-9                               |                        | 93.92    |
| 1.0E-6                                 |                        | 92.55    |
| 10.0E-6                                |                        | 57.66    |
| <b>TETRAHYDROGAMBOGIC ACID</b>         |                        |          |
| 10.0E-9                                |                        | 119.75   |
| 100.0E-9                               |                        | 118.58   |
| 1.0E-6                                 |                        | 126.78   |
| 10.0E-6                                |                        | 84.73    |

| Compounds and Final Concentrations (M)       | Average of % Viability | Hits (✓) |
|----------------------------------------------|------------------------|----------|
| <b>TETRAHYDROSAPPANONE A TRIMETHYL ETHER</b> |                        |          |
| 10.0E-9                                      |                        | 107.04   |
| 100.0E-9                                     |                        | 129.47   |
| 1.0E-6                                       |                        | 105.50   |
| 10.0E-6                                      |                        | 78.82    |
| <b>TETRAHYDROZOLINE HYDROCHLORIDE</b>        |                        |          |
| 10.0E-9                                      |                        | 115.15   |
| 100.0E-9                                     |                        | 76.31    |
| 1.0E-6                                       |                        | 99.58    |
| 10.0E-6                                      |                        | 101.33   |
| <b>TETRAMIZOLE HYDROCHLORIDE</b>             |                        |          |
| 10.0E-9                                      |                        | 139.91   |
| 100.0E-9                                     |                        | 132.18   |
| 1.0E-6                                       |                        | 119.76   |
| 10.0E-6                                      |                        | 111.99   |
| <b>TETRANDRINE</b>                           |                        |          |
| 10.0E-9                                      |                        | 106.02   |
| 100.0E-9                                     |                        | 113.61   |
| 1.0E-6                                       |                        | 94.74    |
| 10.0E-6                                      |                        | -0.06    |
| <b>TETROQUINONE</b>                          |                        |          |
| 10.0E-9                                      |                        | 115.28   |
| 100.0E-9                                     |                        | 113.60   |
| 1.0E-6                                       |                        | 112.24   |
| 10.0E-6                                      |                        | 102.64   |
| <b>THALIDOMIDE</b>                           |                        |          |
| 10.0E-9                                      |                        | 119.14   |
| 100.0E-9                                     |                        | 104.73   |
| 1.0E-6                                       |                        | 107.03   |
| 10.0E-6                                      |                        | 106.57   |
| <b>THEAFLAVIN</b>                            |                        |          |
| 10.0E-9                                      |                        | 111.51   |
| 100.0E-9                                     |                        | 107.41   |
| 1.0E-6                                       |                        | 99.01    |
| 10.0E-6                                      |                        | 117.55   |
| <b>THEAFLAVIN DIGALLATE</b>                  |                        |          |
| 10.0E-9                                      |                        | 112.03   |
| 100.0E-9                                     |                        | 119.86   |
| 1.0E-6                                       |                        | 112.31   |
| 10.0E-6                                      |                        | 98.42    |
| <b>THEAFLAVIN MONOGALLATES</b>               |                        |          |
| 10.0E-9                                      |                        | 113.77   |
| 100.0E-9                                     |                        | 121.54   |
| 1.0E-6                                       |                        | 120.68   |
| 10.0E-6                                      |                        | 73.25    |
| <b>THEANINE</b>                              |                        |          |
| 10.0E-9                                      |                        | 130.04   |
| 100.0E-9                                     |                        | 112.82   |
| 1.0E-6                                       |                        | 123.21   |
| 10.0E-6                                      |                        | 121.37   |
| <b>THEOPHYLLINE</b>                          |                        |          |
| 10.0E-9                                      |                        | 102.09   |
| 100.0E-9                                     |                        | 115.80   |
| 1.0E-6                                       |                        | 124.18   |
| 10.0E-6                                      |                        | 124.27   |
| <b>THERMOPSINE PERCHLORATE</b>               |                        |          |
| 10.0E-9                                      |                        | 102.24   |
| 100.0E-9                                     |                        | 109.15   |
| 1.0E-6                                       |                        | 100.59   |
| 10.0E-6                                      |                        | 95.85    |
| <b>THIABENZAZOLE</b>                         |                        |          |
| 10.0E-9                                      |                        | 109.75   |
| 100.0E-9                                     |                        | 62.26    |
| 1.0E-6                                       |                        | 89.74    |
| 10.0E-6                                      |                        | 17.64    |
| <b>THIAMINE</b>                              |                        |          |
| 10.0E-9                                      |                        | 118.42   |
| 100.0E-9                                     |                        | 108.47   |
| 1.0E-6                                       |                        | 108.82   |
| 10.0E-6                                      |                        | 109.60   |
| <b>THIAMPHENICOL</b>                         |                        |          |
| 10.0E-9                                      |                        | 124.31   |
| 100.0E-9                                     |                        | 103.50   |
| 1.0E-6                                       |                        | 104.00   |
| 10.0E-6                                      |                        | 65.23    |
| <b>THIAMYLAL SODIUM</b>                      |                        |          |
| 10.0E-9                                      |                        | 128.03   |
| 100.0E-9                                     |                        | 135.03   |
| 1.0E-6                                       |                        | 111.81   |
| 10.0E-6                                      |                        | 110.67   |

| Compounds and Final Concentrations (M) | Average of % Viability | Hits (✓) |
|----------------------------------------|------------------------|----------|
| <b>THIMEROSAL</b>                      |                        |          |
| 10.0E-9                                |                        | 79.70    |
| 100.0E-9                               |                        | 26.22    |
| 1.0E-6                                 |                        | 0.88     |
| 10.0E-6                                |                        | 0.06     |
| <b>THIOCTIC ACID</b>                   |                        |          |
| 10.0E-9                                |                        | 90.36    |
| 100.0E-9                               |                        | 96.46    |
| 1.0E-6                                 |                        | 101.08   |
| 10.0E-6                                |                        | 78.39    |
| <b>THIOGUANINE</b>                     |                        |          |
| 10.0E-9                                |                        | 83.79    |
| 100.0E-9                               |                        | 83.86    |
| 1.0E-6                                 |                        | 78.47    |
| 10.0E-6                                |                        | 6.31     |
| <b>THIOGUANOSINE</b>                   |                        |          |
| 10.0E-9                                |                        | 113.69   |
| 100.0E-9                               |                        | 101.03   |
| 1.0E-6                                 |                        | 111.50   |
| 10.0E-6                                |                        | 11.91    |
| <b>THIOPENTAL SODIUM</b>               |                        |          |
| 10.0E-9                                |                        | 109.16   |
| 100.0E-9                               |                        | 109.91   |
| 1.0E-6                                 |                        | 93.28    |
| 10.0E-6                                |                        | 86.67    |
| <b>THIORIDAZINE HYDROCHLORIDE</b>      |                        |          |
| 10.0E-9                                |                        | 88.33    |
| 100.0E-9                               |                        | 83.32    |
| 1.0E-6                                 |                        | 83.41    |
| 10.0E-6                                |                        | 81.99    |
| <b>THIOTEPA</b>                        |                        |          |
| 10.0E-9                                |                        | 121.64   |
| 100.0E-9                               |                        | 115.58   |
| 1.0E-6                                 |                        | 44.93    |
| 10.0E-6                                |                        | 4.13     |
| <b>THIOTHIXENE</b>                     |                        |          |
| 10.0E-9                                |                        | 93.67    |
| 100.0E-9                               |                        | 85.04    |
| 1.0E-6                                 |                        | 84.11    |
| 10.0E-6                                |                        | 48.75    |
| <b>THIRAM</b>                          |                        |          |
| 10.0E-9                                |                        | 111.14   |
| 100.0E-9                               |                        | 95.55    |
| 1.0E-6                                 |                        | -0.04    |
| 10.0E-6                                |                        | 0.00     |
| <b>THONZYLAMINE HYDROCHLORIDE</b>      |                        |          |
| 10.0E-9                                |                        | 103.39   |
| 100.0E-9                               |                        | 88.98    |
| 1.0E-6                                 |                        | 97.25    |
| 10.0E-6                                |                        | 7.00     |
| <b>THYMOQUINONE</b>                    |                        |          |
| 10.0E-9                                |                        | 120.26   |
| 100.0E-9                               |                        | 136.29   |
| 1.0E-6                                 |                        | 81.23    |
| 10.0E-6                                |                        | 0.23     |
| <b>TIAPRIDE HYDROCHLORIDE</b>          |                        |          |
| 10.0E-9                                |                        | 118.18   |
| 100.0E-9                               |                        | 114.96   |
| 1.0E-6                                 |                        | 105.63   |
| 10.0E-6                                |                        | 102.10   |
| <b>TICARCILLIN DISODIUM</b>            |                        |          |
| 10.0E-9                                |                        | 131.64   |
| 100.0E-9                               |                        | 113.68   |
| 1.0E-6                                 |                        | 116.31   |
| 10.0E-6                                |                        | 106.45   |
| <b>TICLOPIDINE HYDROCHLORIDE</b>       |                        |          |
| 10.0E-9                                |                        | 128.27   |
| 100.0E-9                               |                        | 118.71   |
| 1.0E-6                                 |                        | 104.00   |
| 10.0E-6                                |                        | 100.15   |
| <b>TIGOGENIN</b>                       |                        |          |
| 10.0E-9                                |                        | 113.22   |
| 100.0E-9                               |                        | 121.23   |
| 1.0E-6                                 |                        | 108.32   |
| 10.0E-6                                |                        | 110.83   |
| <b>TILMICOSIN</b>                      |                        |          |
| 10.0E-9                                |                        | 124.71   |
| 100.0E-9                               |                        | 136.71   |
| 1.0E-6                                 |                        | 116.07   |
| 10.0E-6                                |                        | 117.63   |

| Compounds and Final Concentrations (M) | Average of % Viability | Hits (✓) |
|----------------------------------------|------------------------|----------|
| <b>TILORONE</b>                        |                        |          |
| 10.0E-9                                |                        | 102.53   |
| 100.0E-9                               |                        | 106.93   |
| 1.0E-6                                 |                        | 93.38    |
| 10.0E-6                                |                        | 1.02     |
| <b>TIMOLOL MALEATE</b>                 |                        |          |
| 10.0E-9                                |                        | 93.18    |
| 100.0E-9                               |                        | 91.40    |
| 1.0E-6                                 |                        | 77.52    |
| 10.0E-6                                |                        | 78.63    |
| <b>TIMONACIC</b>                       |                        |          |
| 10.0E-9                                |                        | 118.76   |
| 100.0E-9                               |                        | 125.61   |
| 1.0E-6                                 |                        | 114.77   |
| 10.0E-6                                |                        | 117.34   |
| <b>TINDAZOLE</b>                       |                        |          |
| 10.0E-9                                |                        | 118.92   |
| 100.0E-9                               |                        | 117.98   |
| 1.0E-6                                 |                        | 115.44   |
| 10.0E-6                                |                        | 106.50   |
| <b>TIOCONAZOLE</b>                     |                        |          |
| 10.0E-9                                |                        | 114.69   |
| 100.0E-9                               |                        | 121.32   |
| 1.0E-6                                 |                        | 94.87    |
| 10.0E-6                                |                        | 39.44    |
| <b>TIOXOLONE</b>                       |                        |          |
| 10.0E-9                                |                        | 118.35   |
| 100.0E-9                               |                        | 125.49   |
| 1.0E-6                                 |                        | 121.35   |
| 10.0E-6                                |                        | 115.70   |
| <b>TIRATRICOL</b>                      |                        |          |
| 10.0E-9                                |                        | 130.15   |
| 100.0E-9                               |                        | 114.13   |
| 1.0E-6                                 |                        | 115.03   |
| 10.0E-6                                |                        | 106.98   |
| <b>TOBRAMYCIN</b>                      |                        |          |
| 10.0E-9                                |                        | 91.93    |
| 100.0E-9                               |                        | 100.68   |
| 1.0E-6                                 |                        | 82.80    |
| 10.0E-6                                |                        | 89.54    |
| <b>TODRALAZINE HYDROCHLORIDE</b>       |                        |          |
| 10.0E-9                                |                        | 108.46   |
| 100.0E-9                               |                        | 108.85   |
| 1.0E-6                                 |                        | 107.74   |
| 10.0E-6                                |                        | 99.53    |
| <b>TOLAZAMIDE</b>                      |                        |          |
| 10.0E-9                                |                        | 109.49   |
| 100.0E-9                               |                        | 108.65   |
| 1.0E-6                                 |                        | 102.31   |
| 10.0E-6                                |                        | 95.73    |
| <b>TOLAZOLINE HYDROCHLORIDE</b>        |                        |          |
| 10.0E-9                                |                        | 85.82    |
| 100.0E-9                               |                        | 89.08    |
| 1.0E-6                                 |                        | 72.08    |
| 10.0E-6                                |                        | 89.59    |
| <b>TOLBUTAMIDE</b>                     |                        |          |
| 10.0E-9                                |                        | 94.81    |
| 100.0E-9                               |                        | 84.20    |
| 1.0E-6                                 |                        | 86.63    |
| 10.0E-6                                |                        | 88.88    |
| <b>TOLFENAMIC ACID</b>                 |                        |          |
| 10.0E-9                                |                        | 122.52   |
| 100.0E-9                               |                        | 115.20   |
| 1.0E-6                                 |                        | 129.92   |
| 10.0E-6                                |                        | 119.18   |
| <b>TOLMETIN SODIUM</b>                 |                        |          |
| 10.0E-9                                |                        | 90.56    |
| 100.0E-9                               |                        | 81.22    |
| 1.0E-6                                 |                        | 86.50    |
| 10.0E-6                                |                        | 81.49    |
| <b>TOLNAFTATE</b>                      |                        |          |
| 10.0E-9                                |                        | 97.47    |
| 100.0E-9                               |                        | 116.69   |
| 1.0E-6                                 |                        | 116.06   |
| 10.0E-6                                |                        | 112.38   |
| <b>TOLPERISONE HYDROCHLORIDE</b>       |                        |          |
| 10.0E-9                                |                        | 86.85    |
| 100.0E-9                               |                        | 80.55    |
| 1.0E-6                                 |                        | 54.90    |
| 10.0E-6                                |                        | 2.83     |

| Compounds and Final Concentrations (M)          | Average of % Viability | Hits (✓) |
|-------------------------------------------------|------------------------|----------|
| <b>TOLTRAZURIL</b>                              |                        |          |
| 10.0E-9                                         |                        | 122.13   |
| 100.0E-9                                        |                        | 112.19   |
| 1.0E-6                                          |                        | 114.94   |
| 10.0E-6                                         |                        | 103.79   |
| <b>TOMATINE</b>                                 |                        |          |
| 10.0E-9                                         |                        | 104.96   |
| 100.0E-9                                        |                        | 104.33   |
| 1.0E-6                                          |                        | 106.44   |
| 10.0E-6                                         |                        | 0.29     |
| <b>TOPIRAMATE</b>                               |                        |          |
| 10.0E-9                                         |                        | 112.85   |
| 100.0E-9                                        |                        | 131.03   |
| 1.0E-6                                          |                        | 110.40   |
| 10.0E-6                                         |                        | 111.05   |
| <b>TOPOTECAN HYDROCHLORIDE</b>                  |                        |          |
| 10.0E-9                                         |                        | 68.24    |
| 100.0E-9                                        |                        | 2.20     |
| 1.0E-6                                          |                        | 2.40     |
| 10.0E-6                                         |                        | 1.32     |
| <b>TOREMIPHENE CITRATE</b>                      |                        |          |
| 10.0E-9                                         |                        | 112.31   |
| 100.0E-9                                        |                        | 111.33   |
| 1.0E-6                                          |                        | 105.06   |
| 10.0E-6                                         |                        | 63.75    |
| <b>TOSYLCHLORAMIDE SODIUM</b>                   |                        |          |
| 10.0E-9                                         |                        | 91.99    |
| 100.0E-9                                        |                        | 84.82    |
| 1.0E-6                                          |                        | 87.49    |
| 10.0E-6                                         |                        | 92.22    |
| <b>TOTAROL</b>                                  |                        |          |
| 10.0E-9                                         |                        | 160.30   |
| 100.0E-9                                        |                        | 141.40   |
| 1.0E-6                                          |                        | 128.55   |
| 10.0E-6                                         |                        | 64.62    |
| <b>TOTAROL ACETATE</b>                          |                        |          |
| 10.0E-9                                         |                        | 123.73   |
| 100.0E-9                                        |                        | 139.24   |
| 1.0E-6                                          |                        | 72.90    |
| 10.0E-6                                         |                        | 2.05     |
| <b>TOTAROL-19-CARBOXYLIC ACID, METHYL ESTER</b> |                        |          |
| 10.0E-9                                         |                        | 93.30    |
| 100.0E-9                                        |                        | 85.27    |
| 1.0E-6                                          |                        | 83.92    |
| 10.0E-6                                         |                        | 59.93    |
| <b>TRAMADOL HYDROCHLORIDE</b>                   |                        |          |
| 10.0E-9                                         |                        | 124.51   |
| 100.0E-9                                        |                        | 116.75   |
| 1.0E-6                                          |                        | 110.47   |
| 10.0E-6                                         |                        | 110.19   |
| <b>TRANEXAMIC ACID</b>                          |                        |          |
| 10.0E-9                                         |                        | 108.85   |
| 100.0E-9                                        |                        | 105.54   |
| 1.0E-6                                          |                        | 95.28    |
| 10.0E-6                                         |                        | 104.78   |
| <b>TRANLYCPROMINE SULFATE</b>                   |                        |          |
| 10.0E-9                                         |                        | 97.29    |
| 100.0E-9                                        |                        | 71.73    |
| 1.0E-6                                          |                        | 89.54    |
| 10.0E-6                                         |                        | 92.15    |
| <b>TRAZODONE HYDROCHLORIDE</b>                  |                        |          |
| 10.0E-9                                         |                        | 96.55    |
| 100.0E-9                                        |                        | 83.43    |
| 1.0E-6                                          |                        | 86.66    |
| 10.0E-6                                         |                        | 69.69    |
| <b>TRETINON</b>                                 |                        |          |
| 10.0E-9                                         |                        | 112.75   |
| 100.0E-9                                        |                        | 135.00   |
| 1.0E-6                                          |                        | 151.57   |
| 10.0E-6                                         |                        | 162.32   |
| <b>TRIA CETIN</b>                               |                        |          |
| 10.0E-9                                         |                        | 83.98    |
| 100.0E-9                                        |                        | 55.62    |
| 1.0E-6                                          |                        | 94.56    |
| 10.0E-6                                         |                        | 105.76   |
| <b>TRIACETYLRRESVERATROL</b>                    |                        |          |
| 10.0E-9                                         |                        | 99.78    |
| 100.0E-9                                        |                        | 91.05    |
| 1.0E-6                                          |                        | 97.08    |
| 10.0E-6                                         |                        | 57.90    |



| Compounds and Final Concentrations (M) | Average of % Viability | Hits (✓) |
|----------------------------------------|------------------------|----------|
| <b>TRIAMCINOLONE</b>                   |                        |          |
| 10.0E-9                                |                        | 95.68    |
| 100.0E-9                               |                        | 100.43   |
| 1.0E-6                                 |                        | 97.38    |
| 10.0E-6                                |                        | 104.94   |
| <b>TRIAMCINOLONE ACETONIDE</b>         |                        |          |
| 10.0E-9                                |                        | 99.23    |
| 100.0E-9                               |                        | 92.78    |
| 1.0E-6                                 |                        | 107.69   |
| 10.0E-6                                |                        | 105.67   |
| <b>TRIAMCINOLONE DIACETATE</b>         |                        |          |
| 10.0E-9                                |                        | 102.12   |
| 100.0E-9                               |                        | 104.89   |
| 1.0E-6                                 |                        | 119.05   |
| 10.0E-6                                |                        | 116.85   |
| <b>TRIAMTERENE</b>                     |                        |          |
| 10.0E-9                                |                        | 113.76   |
| 100.0E-9                               |                        | 103.23   |
| 1.0E-6                                 |                        | 106.89   |
| 10.0E-6                                |                        | 128.55   |
| <b>TRICHLORFON</b>                     |                        |          |
| 10.0E-9                                |                        | 100.26   |
| 100.0E-9                               |                        | 111.06   |
| 1.0E-6                                 |                        | 111.05   |
| 10.0E-6                                |                        | 101.73   |
| <b>TRICHLORMETHIAZIDE</b>              |                        |          |
| 10.0E-9                                |                        | 120.48   |
| 100.0E-9                               |                        | 103.31   |
| 1.0E-6                                 |                        | 108.91   |
| 10.0E-6                                |                        | 90.85    |
| <b>TRICHLORMETHINE</b>                 |                        |          |
| 10.0E-9                                |                        | 97.24    |
| 100.0E-9                               |                        | 95.57    |
| 1.0E-6                                 |                        | 92.17    |
| 10.0E-6                                |                        | 2.28     |
| <b>TRICLABENDAZOLE</b>                 |                        |          |
| 10.0E-9                                |                        | 113.53   |
| 100.0E-9                               |                        | 112.07   |
| 1.0E-6                                 |                        | 90.99    |
| 10.0E-6                                |                        | 70.64    |
| <b>TRICLOSAN</b>                       |                        |          |
| 10.0E-9                                |                        | 109.77   |
| 100.0E-9                               |                        | 108.85   |
| 1.0E-6                                 |                        | 105.17   |
| 10.0E-6                                |                        | 105.25   |
| <b>TRIDESACETOXYKHIVORIN</b>           |                        |          |
| 10.0E-9                                |                        | 124.07   |
| 100.0E-9                               |                        | 130.18   |
| 1.0E-6                                 |                        | 124.17   |
| 10.0E-6                                |                        | 113.38   |
| <b>TRIENTINE HYDROCHLORIDE</b>         |                        |          |
| 10.0E-9                                |                        | 133.62   |
| 100.0E-9                               |                        | 115.46   |
| 1.0E-6                                 |                        | 105.65   |
| 10.0E-6                                |                        | 103.75   |
| <b>TRIFLUOPERAZINE HYDROCHLORIDE</b>   |                        |          |
| 10.0E-9                                |                        | 105.92   |
| 100.0E-9                               |                        | 100.08   |
| 1.0E-6                                 |                        | 7.99     |
| 10.0E-6                                |                        | 0.67     |
| <b>TRIFLUPROMAZINE HYDROCHLORIDE</b>   |                        |          |
| 10.0E-9                                |                        | 101.87   |
| 100.0E-9                               |                        | 103.04   |
| 1.0E-6                                 |                        | 102.82   |
| 10.0E-6                                |                        | 93.05    |
| <b>TRIFLURIDINE</b>                    |                        |          |
| 10.0E-9                                |                        | 101.16   |
| 100.0E-9                               |                        | 112.12   |
| 1.0E-6                                 |                        | 109.33   |
| 10.0E-6                                |                        | 3.36     |
| <b>TRIGONELLINE</b>                    |                        |          |
| 10.0E-9                                |                        | 109.79   |
| 100.0E-9                               |                        | 107.78   |
| 1.0E-6                                 |                        | 106.22   |
| 10.0E-6                                |                        | 62.03    |
| <b>TRIHENYPHENIDYL HYDROCHLORIDE</b>   |                        |          |
| 10.0E-9                                |                        | 114.48   |
| 100.0E-9                               |                        | 108.02   |
| 1.0E-6                                 |                        | 98.44    |
| 10.0E-6                                |                        | 12.15    |

| Compounds and Final Concentrations (M)       | Average of % Viability | Hits (✓) |
|----------------------------------------------|------------------------|----------|
| <b>TRILOSTANE</b>                            |                        |          |
| 10.0E-9                                      |                        | 104.05   |
| 100.0E-9                                     |                        | 92.61    |
| 1.0E-6                                       |                        | 101.98   |
| 10.0E-6                                      |                        | 87.84    |
| <b>TRIMEBUTINE MALEATE</b>                   |                        |          |
| 10.0E-9                                      |                        | 108.04   |
| 100.0E-9                                     |                        | 106.78   |
| 1.0E-6                                       |                        | 108.51   |
| 10.0E-6                                      |                        | 53.77    |
| <b>TRIMEDLURE</b>                            |                        |          |
| 10.0E-9                                      |                        | 73.17    |
| 100.0E-9                                     |                        | 87.47    |
| 1.0E-6                                       |                        | 96.96    |
| 10.0E-6                                      |                        | 86.60    |
| <b>TRIMEPAZINE TARTRATE</b>                  |                        |          |
| 10.0E-9                                      |                        | 113.73   |
| 100.0E-9                                     |                        | 102.55   |
| 1.0E-6                                       |                        | 107.07   |
| 10.0E-6                                      |                        | 107.69   |
| <b>TRIMETAZIDINE DIHYDROCHLORIDE</b>         |                        |          |
| 10.0E-9                                      |                        | 118.83   |
| 100.0E-9                                     |                        | 107.49   |
| 1.0E-6                                       |                        | 125.27   |
| 10.0E-6                                      |                        | 114.05   |
| <b>TRIMETHADIONE</b>                         |                        |          |
| 10.0E-9                                      |                        | 117.24   |
| 100.0E-9                                     |                        | 113.75   |
| 1.0E-6                                       |                        | 109.94   |
| 10.0E-6                                      |                        | 108.75   |
| <b>TRIMETHOBENZAMIDE HYDROCHLORIDE</b>       |                        |          |
| 10.0E-9                                      |                        | 101.12   |
| 100.0E-9                                     |                        | 122.95   |
| 1.0E-6                                       |                        | 119.38   |
| 10.0E-6                                      |                        | 121.76   |
| <b>TRIMETHOPRIM</b>                          |                        |          |
| 10.0E-9                                      |                        | 106.92   |
| 100.0E-9                                     |                        | 84.75    |
| 1.0E-6                                       |                        | 113.67   |
| 10.0E-6                                      |                        | 120.18   |
| <b>TRIMETHYLCOLCHICINIC ACID</b>             |                        |          |
| 10.0E-9                                      |                        | 109.45   |
| 100.0E-9                                     |                        | 110.70   |
| 1.0E-6                                       |                        | 127.19   |
| 10.0E-6                                      |                        | 112.71   |
| <b>TRIMETOZINE</b>                           |                        |          |
| 10.0E-9                                      |                        | 97.65    |
| 100.0E-9                                     |                        | 108.67   |
| 1.0E-6                                       |                        | 107.85   |
| 10.0E-6                                      |                        | 123.26   |
| <b>TRIMIPRAMINE MALEATE</b>                  |                        |          |
| 10.0E-9                                      |                        | 114.82   |
| 100.0E-9                                     |                        | 124.78   |
| 1.0E-6                                       |                        | 106.68   |
| 10.0E-6                                      |                        | 95.13    |
| <b>TRIOXSALEN</b>                            |                        |          |
| 10.0E-9                                      |                        | 98.67    |
| 100.0E-9                                     |                        | 42.50    |
| 1.0E-6                                       |                        | 113.44   |
| 10.0E-6                                      |                        | 108.68   |
| <b>TRIPLENNAMINE CITRATE</b>                 |                        |          |
| 10.0E-9                                      |                        | 116.55   |
| 100.0E-9                                     |                        | 94.51    |
| 1.0E-6                                       |                        | 87.79    |
| 10.0E-6                                      |                        | 109.70   |
| <b>TRIPROLIDINE HYDROCHLORIDE</b>            |                        |          |
| 10.0E-9                                      |                        | 121.88   |
| 100.0E-9                                     |                        | 104.24   |
| 1.0E-6                                       |                        | 98.66    |
| 10.0E-6                                      |                        | 102.60   |
| <b>TRIPTOPHENOLIDE</b>                       |                        |          |
| 10.0E-9                                      |                        | 128.34   |
| 100.0E-9                                     |                        | 117.40   |
| 1.0E-6                                       |                        | 108.08   |
| 10.0E-6                                      |                        | 78.21    |
| <b>TRISODIUM ETHYLENEDIAMINE TETRACETATE</b> |                        |          |
| 10.0E-9                                      |                        | 95.84    |
| 100.0E-9                                     |                        | 91.65    |
| 1.0E-6                                       |                        | 84.64    |
| 10.0E-6                                      |                        | 92.70    |

| Compounds and Final Concentrations (M) | Average of % Viability | Hits (✓) |
|----------------------------------------|------------------------|----------|
| <b>TROLOX</b>                          |                        |          |
| 10.0E-9                                |                        | 113.97   |
| 100.0E-9                               |                        | 128.19   |
| 1.0E-6                                 |                        | 106.30   |
| 10.0E-6                                |                        | 114.36   |
| <b>TROPICAMIDE</b>                     |                        |          |
| 10.0E-9                                |                        | 119.60   |
| 100.0E-9                               |                        | 108.83   |
| 1.0E-6                                 |                        | 94.42    |
| 10.0E-6                                |                        | 109.09   |
| <b>TROXERUTIN</b>                      |                        |          |
| 10.0E-9                                |                        | 124.61   |
| 100.0E-9                               |                        | 126.77   |
| 1.0E-6                                 |                        | 109.96   |
| 10.0E-6                                |                        | 113.19   |
| <b>TRYPTAMINE</b>                      |                        |          |
| 10.0E-9                                |                        | 128.07   |
| 100.0E-9                               |                        | 127.76   |
| 1.0E-6                                 |                        | 122.00   |
| 10.0E-6                                |                        | 114.03   |
| <b>TRYPTOPHAN</b>                      |                        |          |
| 10.0E-9                                |                        | 128.41   |
| 100.0E-9                               |                        | 102.27   |
| 1.0E-6                                 |                        | 94.50    |
| 10.0E-6                                |                        | 119.04   |
| <b>TUAMINOHEPTANE SULFATE</b>          |                        |          |
| 10.0E-9                                |                        | 122.43   |
| 100.0E-9                               |                        | 112.63   |
| 1.0E-6                                 |                        | 99.73    |
| 10.0E-6                                |                        | 112.65   |
| <b>TUBOCURARINE CHLORIDE</b>           |                        |          |
| 10.0E-9                                |                        | 97.46    |
| 100.0E-9                               |                        | 92.87    |
| 1.0E-6                                 |                        | 101.37   |
| 10.0E-6                                |                        | 86.70    |
| <b>TULOButEROL</b>                     |                        |          |
| 10.0E-9                                |                        | 84.45    |
| 100.0E-9                               |                        | 82.02    |
| 1.0E-6                                 |                        | 91.92    |
| 10.0E-6                                |                        | 84.43    |
| <b>TYLOSIN TARTRATE</b>                |                        |          |
| 10.0E-9                                |                        | 116.86   |
| 100.0E-9                               |                        | 101.99   |
| 1.0E-6                                 |                        | 94.91    |
| 10.0E-6                                |                        | 85.56    |
| <b>TYLOXAPOL</b>                       |                        |          |
| 10.0E-9                                |                        | 120.01   |
| 100.0E-9                               |                        | 116.37   |
| 1.0E-6                                 |                        | 106.79   |
| 10.0E-6                                |                        | 102.28   |
| <b>TYROSINE</b>                        |                        |          |
| 10.0E-9                                |                        | 118.66   |
| 100.0E-9                               |                        | 117.10   |
| 1.0E-6                                 |                        | 107.14   |
| 10.0E-6                                |                        | 111.16   |
| <b>TYROTHRICIN</b>                     |                        |          |
| 10.0E-9                                |                        | 122.90   |
| 100.0E-9                               |                        | 103.38   |
| 1.0E-6                                 |                        | 33.67    |
| 10.0E-6                                |                        | 0.44     |
| <b>UBIDECARENONE</b>                   |                        |          |
| 10.0E-9                                |                        | 135.80   |
| 100.0E-9                               |                        | 120.71   |
| 1.0E-6                                 |                        | 106.39   |
| 10.0E-6                                |                        | 117.47   |
| <b>UMBELLIFERONE</b>                   |                        |          |
| 10.0E-9                                |                        | 133.41   |
| 100.0E-9                               |                        | 120.18   |
| 1.0E-6                                 |                        | 116.54   |
| 10.0E-6                                |                        | 121.86   |
| <b>UNDECYLENIC ACID</b>                |                        |          |
| 10.0E-9                                |                        | 116.41   |
| 100.0E-9                               |                        | 122.46   |
| 1.0E-6                                 |                        | 111.44   |
| 10.0E-6                                |                        | 0.18     |
| <b>URAPIDIL HYDROCHLORIDE</b>          |                        |          |
| 10.0E-9                                |                        | 95.88    |
| 100.0E-9                               |                        | 88.34    |
| 1.0E-6                                 |                        | 81.21    |
| 10.0E-6                                |                        | 83.09    |

| Compounds and Final Concentrations (M) | Average of % Viability | Hits (✓) |
|----------------------------------------|------------------------|----------|
| <b>UREA</b>                            |                        |          |
| 10.0E-9                                |                        | 138.82   |
| 100.0E-9                               |                        | 107.18   |
| 1.0E-6                                 |                        | 99.14    |
| 10.0E-6                                |                        | 102.15   |
| <b>URIDINE TRIPHOSPHATE TRISODIUM</b>  |                        |          |
| 10.0E-9                                |                        | 133.43   |
| 100.0E-9                               |                        | 114.43   |
| 1.0E-6                                 |                        | 107.44   |
| 10.0E-6                                |                        | 116.30   |
| <b>URSINOIC ACID</b>                   |                        |          |
| 10.0E-9                                |                        | 106.31   |
| 100.0E-9                               |                        | 112.17   |
| 1.0E-6                                 |                        | 110.68   |
| 10.0E-6                                |                        | 69.50    |
| <b>URSOCHOLANIC ACID</b>               |                        |          |
| 10.0E-9                                |                        | 93.92    |
| 100.0E-9                               |                        | 99.68    |
| 1.0E-6                                 |                        | 110.59   |
| 10.0E-6                                |                        | 115.61   |
| <b>URSODIOL</b>                        |                        |          |
| 10.0E-9                                |                        | 134.91   |
| 100.0E-9                               |                        | 113.06   |
| 1.0E-6                                 |                        | 109.62   |
| 10.0E-6                                |                        | 109.94   |
| <b>URSOLIC ACID</b>                    |                        |          |
| 10.0E-9                                |                        | 125.03   |
| 100.0E-9                               |                        | 117.21   |
| 1.0E-6                                 |                        | 114.82   |
| 10.0E-6                                |                        | 100.22   |
| <b>UTILIN</b>                          |                        |          |
| 10.0E-9                                |                        | 108.93   |
| 100.0E-9                               |                        | 117.14   |
| 1.0E-6                                 |                        | 102.24   |
| 10.0E-6                                |                        | 98.12    |
| <b>VALACYCLOVIR HYDROCHLORIDE</b>      |                        |          |
| 10.0E-9                                |                        | 84.33    |
| 100.0E-9                               |                        | 84.86    |
| 1.0E-6                                 |                        | 78.39    |
| 10.0E-6                                |                        | 75.21    |
| <b>VALERYL SALYCLATE</b>               |                        |          |
| 10.0E-9                                |                        | 120.24   |
| 100.0E-9                               |                        | 127.68   |
| 1.0E-6                                 |                        | 128.88   |
| 10.0E-6                                |                        | 123.80   |
| <b>VALINOMYCIN</b>                     |                        |          |
| 10.0E-9                                |                        | 0.91     |
| 100.0E-9                               |                        | 1.30     |
| 1.0E-6                                 |                        | 1.06     |
| 10.0E-6                                |                        | 1.10     |
| <b>VALPROATE SODIUM</b>                |                        |          |
| 10.0E-9                                |                        | 104.29   |
| 100.0E-9                               |                        | 80.13    |
| 1.0E-6                                 |                        | 106.76   |
| 10.0E-6                                |                        | 101.30   |
| <b>VALSARTAN</b>                       |                        |          |
| 10.0E-9                                |                        | 97.80    |
| 100.0E-9                               |                        | 111.01   |
| 1.0E-6                                 |                        | 108.04   |
| 10.0E-6                                |                        | 106.58   |
| <b>VANCOMYCIN HYDROCHLORIDE</b>        |                        |          |
| 10.0E-9                                |                        | 97.05    |
| 100.0E-9                               |                        | 55.18    |
| 1.0E-6                                 |                        | 109.93   |
| 10.0E-6                                |                        | 106.31   |
| <b>VARDENAFIL HYDROCHLORIDE</b>        |                        |          |
| 10.0E-9                                |                        | 111.27   |
| 100.0E-9                               |                        | 115.64   |
| 1.0E-6                                 |                        | 107.03   |
| 10.0E-6                                |                        | 104.76   |
| <b>VECURONIUM BROMIDE</b>              |                        |          |
| 10.0E-9                                |                        | 81.98    |
| 100.0E-9                               |                        | 77.35    |
| 1.0E-6                                 |                        | 87.43    |
| 10.0E-6                                |                        | 87.51    |
| <b>VENLAFAXINE</b>                     |                        |          |
| 10.0E-9                                |                        | 102.12   |
| 100.0E-9                               |                        | 87.89    |
| 1.0E-6                                 |                        | 94.65    |
| 10.0E-6                                |                        | 97.51    |

| Compounds and Final Concentrations (M) | Average of % Viability | Hits (✓) |
|----------------------------------------|------------------------|----------|
| <b>VERAPAMIL HYDROCHLORIDE</b>         |                        |          |
| 10.0E-9                                |                        | 99.72    |
| 100.0E-9                               |                        | 106.92   |
| 1.0E-6                                 |                        | 106.36   |
| 10.0E-6                                |                        | 103.78   |
| <b>VERATRINE SULFATE</b>               |                        |          |
| 10.0E-9                                |                        | 126.71   |
| 100.0E-9                               |                        | 128.79   |
| 1.0E-6                                 |                        | 122.38   |
| 10.0E-6                                |                        | 105.73   |
| <b>VESAMICOL HYDROCHLORIDE</b>         |                        |          |
| 10.0E-9                                |                        | 115.80   |
| 100.0E-9                               |                        | 119.65   |
| 1.0E-6                                 |                        | 99.38    |
| 10.0E-6                                |                        | 94.36    |
| <b>VIDARABINE</b>                      |                        |          |
| 10.0E-9                                |                        | 108.87   |
| 100.0E-9                               |                        | 104.44   |
| 1.0E-6                                 |                        | 96.61    |
| 10.0E-6                                |                        | 90.98    |
| <b>VIGABATRIN</b>                      |                        |          |
| 10.0E-9                                |                        | 96.64    |
| 100.0E-9                               |                        | 101.37   |
| 1.0E-6                                 |                        | 108.41   |
| 10.0E-6                                |                        | 111.57   |
| <b>VINBLASTINE SULFATE</b>             |                        |          |
| 10.0E-9                                |                        | 105.26   |
| 100.0E-9                               |                        | 29.88    |
| 1.0E-6                                 |                        | 1.25     |
| 10.0E-6                                |                        | 3.11     |
| <b>VINCAMINE</b>                       |                        |          |
| 10.0E-9                                |                        | 104.24   |
| 100.0E-9                               |                        | 107.64   |
| 1.0E-6                                 |                        | 107.50   |
| 10.0E-6                                |                        | 119.72   |
| <b>VINCRIStINE SULFATE</b>             |                        |          |
| 10.0E-9                                |                        | 1.54     |
| 100.0E-9                               |                        | 1.55     |
| 1.0E-6                                 |                        | 2.21     |
| 10.0E-6                                |                        | 3.31     |
| <b>VIOLASTYRENE</b>                    |                        |          |
| 10.0E-9                                |                        | 114.58   |
| 100.0E-9                               |                        | 128.51   |
| 1.0E-6                                 |                        | 115.19   |
| 10.0E-6                                |                        | 113.16   |
| <b>VISNAGIN</b>                        |                        |          |
| 10.0E-9                                |                        | 125.65   |
| 100.0E-9                               |                        | 132.44   |
| 1.0E-6                                 |                        | 115.05   |
| 10.0E-6                                |                        | 107.74   |
| <b>VULPINIC ACID</b>                   |                        |          |
| 10.0E-9                                |                        | 132.96   |
| 100.0E-9                               |                        | 130.09   |
| 1.0E-6                                 |                        | 111.76   |
| 10.0E-6                                |                        | 109.28   |
| <b>WARFARIN</b>                        |                        |          |
| 10.0E-9                                |                        | 122.92   |
| 100.0E-9                               |                        | 116.98   |
| 1.0E-6                                 |                        | 107.50   |
| 10.0E-6                                |                        | 104.16   |
| <b>XANTHONE</b>                        |                        |          |
| 10.0E-9                                |                        | 110.65   |
| 100.0E-9                               |                        | 131.90   |
| 1.0E-6                                 |                        | 122.55   |
| 10.0E-6                                |                        | 122.25   |
| <b>XANTHOPTERIN</b>                    |                        |          |
| 10.0E-9                                |                        | 112.40   |
| 100.0E-9                               |                        | 100.61   |
| 1.0E-6                                 |                        | 95.48    |
| 10.0E-6                                |                        | 88.14    |
| <b>XANTHOXYLIN</b>                     |                        |          |
| 10.0E-9                                |                        | 122.87   |
| 100.0E-9                               |                        | 116.83   |
| 1.0E-6                                 |                        | 114.90   |
| 10.0E-6                                |                        | 67.91    |
| <b>XANTHURENIC ACID</b>                |                        |          |
| 10.0E-9                                |                        | 110.12   |
| 100.0E-9                               |                        | 118.09   |
| 1.0E-6                                 |                        | 116.20   |
| 10.0E-6                                |                        | 103.46   |

| Compounds and Final Concentrations (M) | Average of % Viability | Hits (✓)      |
|----------------------------------------|------------------------|---------------|
| <b>XANTHYLETIN</b>                     |                        |               |
| 10.0E-9                                |                        | 107.09        |
| 100.0E-9                               |                        | 95.67         |
| 1.0E-6                                 |                        | 96.32         |
| 10.0E-6                                |                        | 76.40         |
| <b>XYLAZINE</b>                        |                        |               |
| 10.0E-9                                |                        | 104.58        |
| 100.0E-9                               |                        | 103.60        |
| 1.0E-6                                 |                        | 102.57        |
| 10.0E-6                                |                        | 103.11        |
| <b>XYLOCARPUS A</b>                    |                        |               |
| 10.0E-9                                |                        | 121.79        |
| 100.0E-9                               |                        | 120.71        |
| 1.0E-6                                 |                        | 116.06        |
| 10.0E-6                                |                        | 31.10         |
| <b>XYLOMETAZOLINE HYDROCHLORIDE</b>    |                        |               |
| 10.0E-9                                |                        | 136.57        |
| 100.0E-9                               |                        | 111.22        |
| 1.0E-6                                 |                        | 108.84        |
| 10.0E-6                                |                        | 104.85        |
| <b>XYLOSE</b>                          |                        |               |
| 10.0E-9                                |                        | 110.47        |
| 100.0E-9                               |                        | 99.22         |
| 1.0E-6                                 |                        | 105.27        |
| 10.0E-6                                |                        | 100.08        |
| <b>YOHIMBIC ACID HYDRATE</b>           |                        |               |
| 10.0E-9                                |                        | 114.84        |
| 100.0E-9                               |                        | 114.15        |
| 1.0E-6                                 |                        | 110.31        |
| 10.0E-6                                |                        | 62.45         |
| <b>YOHIMBINE HYDROCHLORIDE</b>         |                        |               |
| 10.0E-9                                |                        | 133.83        |
| 100.0E-9                               |                        | 91.79         |
| 1.0E-6                                 |                        | 112.18        |
| 10.0E-6                                |                        | 106.60        |
| <b>ZAPRINAST</b>                       |                        |               |
| 10.0E-9                                |                        | 111.66        |
| 100.0E-9                               |                        | 109.77        |
| 1.0E-6                                 |                        | 102.91        |
| 10.0E-6                                |                        | 48.70         |
| <b>ZIDOVUDINE [AZT]</b>                |                        |               |
| 10.0E-9                                |                        | 98.13         |
| 100.0E-9                               |                        | 101.30        |
| 1.0E-6                                 |                        | 103.14        |
| 10.0E-6                                |                        | 100.24        |
| <b>ZILEUTON</b>                        |                        |               |
| 10.0E-9                                |                        | 99.84         |
| 100.0E-9                               |                        | 116.98        |
| 1.0E-6                                 |                        | 120.36        |
| 10.0E-6                                |                        | 112.15        |
| <b>ZINC UNDECYLENATE</b>               |                        |               |
| 10.0E-9                                |                        | 113.55        |
| 100.0E-9                               |                        | 111.28        |
| 1.0E-6                                 |                        | 115.88        |
| 10.0E-6                                |                        | 104.01        |
| <b>ZOLMITRIPTAN</b>                    |                        |               |
| 10.0E-9                                |                        | 115.97        |
| 100.0E-9                               |                        | 106.91        |
| 1.0E-6                                 |                        | 104.39        |
| 10.0E-6                                |                        | 107.25        |
| <b>ZOMEPIRAC SODIUM</b>                |                        |               |
| 10.0E-9                                |                        | 88.16         |
| 100.0E-9                               |                        | 83.60         |
| 1.0E-6                                 |                        | 82.31         |
| 10.0E-6                                |                        | 84.84         |
| <b>ZOPICLONE</b>                       |                        |               |
| 10.0E-9                                |                        | 121.08        |
| 100.0E-9                               |                        | 106.88        |
| 1.0E-6                                 |                        | 104.28        |
| 10.0E-6                                |                        | 98.17         |
| <b>ZOXAZOLAMINE</b>                    |                        |               |
| 10.0E-9                                |                        | 101.55        |
| 100.0E-9                               |                        | 108.20        |
| 1.0E-6                                 |                        | 113.82        |
| 10.0E-6                                |                        | 28.25         |
| <b>Grand Total</b>                     |                        | <b>101.74</b> |

Number of preliminary "Hits" 134
